# Supplementary material for: Circular RNA profiling in the oocyte and cumulus cells reveals that circARMC4 is essential for porcine oocyte maturation
Source: Aging (Albany NY). 2019 Sep 28;11(18):8015–34. doi: 10.18632/aging.102315 (PMC6781969; doi:10.18632/aging.102315)
Supplement: Supplementary Table 3 [file aging-11-102315-s008.xlsx]

## Sheet: Sheet1
Supplementary Table 3. List of all circRNAs expressed in cumulus cells and oocytes.
Accession	MCC1_MCC_count	MCC2_MCC_count	MCC3_MCC_count	MII_oocyte1_MII_CC_count	MII_oocyte2_MII_CC_count	MII_oocyte3_MII_CC_count	GV_oocyte1_COC_count	GV_oocyte2_COC_count	GV_oocyte3_COC_count	GCC1_GCC_count	GCC2_GCC_count	GCC3_GCC_count	MCC1_MCC_fpkm	MCC2_MCC_fpkm	MCC3_MCC_fpkm	MII_oocyte1_MII_CC_fpkm	MII_oocyte2_MII_CC_fpkm	MII_oocyte3_MII_CC_fpkm	GV_oocyte1_COC_fpkm	GV_oocyte2_COC_fpkm	GV_oocyte3_COC_fpkm	GCC1_GCC_fpkm	GCC2_GCC_fpkm	GCC3_GCC_fpkm	chr	start	end	strand	exon Count	circType	circRNA category	isoformName	geneName	hosting gene type	flankIntron	gene Discription	GO	KEGG
ciRNA1	3	5	1.5	11	4	2	10.5	33.5	9	41	46	9	0.460124	0.738972	0.219326	1.67754	0.651501	0.336574	1.76307	3.90421	1.41158	4.12383	4.46836	0.963161	chr7	80963958	80964232	-	1	ciRNA	-	ENSSSCT00000002260	PPP1R3E	mRNA	chr7:80963930-80964232	protein phosphatase 1 regulatory subunit 3E [Source:HGNC Symbol;Acc:HGNC:14943]	NA	NA
ciRNA10	22	1	10	0	3	16	4	11	8	0	0	29	3.5282	0.154538	1.52889	0	0.510921	2.81545	0.702292	1.34047	1.31199	0	0	3.24513	chr3	42877346	42877608	-	1	ciRNA	-	ENSSSCT00000022926	ENSSSCG00000029921	mRNA	chr3:42877343-42877608	NA	GO:0006468(protein phosphorylation);GO:0005524(ATP binding);GO:0004672(protein kinase activity)	NA
ciRNA100	360.167	311	290.5	240.5	205.5	222.5	140.5	185.5	128	145	191	96	43.4032	36.1146	33.3741	28.8177	26.2985	29.4202	18.5362	16.9862	15.7738	11.4591	14.5777	8.07221	chr12	1163312	1163661	+	1	ciRNA	-	ENSSSCT00000025260	ACTG1	mRNA	chr12:1163311-1163686	actin gamma 1 [Source:HGNC Symbol;Acc:HGNC:144]	GO:0097433(dense body);GO:0072562(blood microparticle);GO:0070062(extracellular exosome);GO:0043209(myelin sheath);GO:0031941(filamentous actin);GO:0031012(extracellular matrix);GO:0030016(myofibril);GO:0016020(membrane);GO:0015629(actin cytoskeleton);GO:0005925(focal adhesion);GO:0005886(plasma membrane);GO:0005856(cytoskeleton);GO:0005634(nucleus);GO:0005615(extracellular space);GO:0070527(plat…	04015(Rap1 signaling pathway);04390(Hippo signaling pathway);04145(Phagosome);04810(Regulation of actin cytoskeleton);04510(Focal adhesion);04520(Adherens junction);04530(Tight junction);04611(Platelet activation);04670(Leukocyte transendothelial migration);04921(Oxytocin signaling pathway);04919(Thyroid hormone signaling pathway);05205(Proteoglycans in cancer);05410(Hypertrophic cardiomyopathy (…
ciRNA101	14	14	26	0	6	0	10	15	11	0	0	0	1.64942	1.58941	2.92026	0	0.750682	0	1.28982	1.34286	1.32527	0	0	0	chr12	1446545	1446902	+	1	ciRNA	-	ENSSSCT00000018663	CEP131	mRNA	chr12:1446544-1446925	centrosomal protein 131 [Source:HGNC Symbol;Acc:HGNC:29511]	GO:0045171(intercellular bridge);GO:0043231(intracellular membrane-bounded organelle);GO:0035869(ciliary transition zone);GO:0034451(centriolar satellite);GO:0015630(microtubule cytoskeleton);GO:0005815(microtubule organizing center);GO:0005813(centrosome);GO:0090316(positive regulation of intracellular protein transport);GO:0071539(protein localization to centrosome);GO:0060271(cilium assembly);…	NA
ciRNA102	1	2	1	14	1	5	4	4	16	7	0	6	0.266949	0.514474	0.254492	3.71607	0.283485	1.46452	1.169	0.81138	4.36775	1.22543	0	1.11759	chr12	2390290	2390447	-	1	ciRNA	-	ENSSSCT00000018680	ENSSSCG00000017156	mRNA	chr12:2390265-2390447	NA	GO:0008152(metabolic process);GO:0005975(carbohydrate metabolic process);GO:0030246(carbohydrate binding);GO:0016798(hydrolase activity, acting on glycosyl bonds);GO:0016787(hydrolase activity);GO:0004553(hydrolase activity, hydrolyzing O-glycosyl compounds);GO:0003824(catalytic activity)	00052(Galactose metabolism);00500(Starch and sucrose metabolism);04142(Lysosome)
ciRNA103	27	16	4	0	31	10	10	17	20	24	0	0	5.81024	3.31783	0.820607	0	7.08424	2.36117	2.3559	2.77981	4.40118	3.38692	0	0	chr12	5008338	5008533	+	1	ciRNA	-	ENSSSCT00000032146	UBE2O	mRNA	chr12:5008337-5008556	ubiquitin conjugating enzyme E2 O [Source:HGNC Symbol;Acc:HGNC:29554]	GO:0016604(nuclear body);GO:0005829(cytosol);GO:0005737(cytoplasm);GO:0005634(nucleus);GO:0070534(protein K63-linked ubiquitination);GO:0042147(retrograde transport, endosome to Golgi);GO:0030513(positive regulation of BMP signaling pathway);GO:0006513(protein monoubiquitination);GO:0061631(ubiquitin conjugating enzyme activity);GO:0061630(ubiquitin protein ligase activity);GO:0031625(ubiquitin p…	04120(Ubiquitin mediated proteolysis)
ciRNA104	7	1.5	3.5	6	7	12.5	1	10.5	8.5	25.5	17.5	26	1.85689	0.383429	0.88512	1.58258	1.97192	3.63828	0.290413	2.11648	2.30577	4.43601	2.94011	4.81244	chr12	49604113	49604271	-	1	ciRNA	-	ENSSSCT00000030204	ENSSSCG00000030707	mRNA	chr12:49604091-49604271	NA	GO:0046856(phosphatidylinositol dephosphorylation);GO:0016787(hydrolase activity)	00562(Inositol phosphate metabolism);04070(Phosphatidylinositol signaling system)
ciRNA105	7	1.5	3.5	6	7	12.5	1	9.5	8.5	25.5	16.5	26	1.86865	0.385856	0.890722	1.5926	1.9844	3.66131	0.292251	1.92703	2.32037	4.46408	2.78965	4.8429	chr12	49604114	49604271	-	1	ciRNA	-	ENSSSCT00000030204	ENSSSCG00000030707	mRNA	chr12:49604091-49604271	NA	GO:0046856(phosphatidylinositol dephosphorylation);GO:0016787(hydrolase activity)	00562(Inositol phosphate metabolism);04070(Phosphatidylinositol signaling system)
ciRNA106	4.5	13	1	18	0.5	8.5	10.5	8.5	8	0	10.5	0	0.250067	0.696133	0.0529773	0.994588	0.0295064	0.518276	0.638794	0.358921	0.454614	0	0.369548	0	chr12	56027502	56028260	-	1	ciRNA	-	ENSSSCT00000024076	RPL26	mRNA	chr12:56026758-56028260	ribosomal protein L26 [Source:HGNC Symbol;Acc:HGNC:10327]	GO:0070062(extracellular exosome);GO:0022625(cytosolic large ribosomal subunit);GO:0016020(membrane);GO:0015934(large ribosomal subunit);GO:0005840(ribosome);GO:0005622(intracellular);GO:0042273(ribosomal large subunit biogenesis);GO:0006412(translation);GO:0006364(rRNA processing);GO:0003735(structural constituent of ribosome);GO:0003723(RNA binding)	03010(Ribosome)
ciRNA107	20	10	29	0	10	0	9	14	4	0	0	3	6.15737	2.96668	8.51155	0	3.26939	0	3.03344	3.27513	1.25931	0	0	0.644451	chr17	37442546	37442682	+	1	ciRNA	-	ENSSSCT00000029302	NOP56	mRNA	chr17:37442545-37442701	NA	GO:0032040(small-subunit processome);GO:0031428(box C/D snoRNP complex);GO:0000154(rRNA modification);GO:0030515(snoRNA binding)	03008(Ribosome biogenesis in eukaryotes)
ciRNA108	161	157	133	97	116	36	116	234	130	205	211	235	21.7649	20.452	17.1407	13.0386	16.653	5.33988	17.1679	24.0371	17.9715	18.1739	18.0655	22.1668	chr16	55769468	55769779	+	1	ciRNA	-	ENSSSCT00000018501	DUSP1	mRNA	chr16:55769467-55769808	dual specificity phosphatase 1 [Source:HGNC Symbol;Acc:HGNC:3064]	GO:0005737(cytoplasm);GO:0005634(nucleus);GO:0043407(negative regulation of MAP kinase activity);GO:0042981(regulation of apoptotic process);GO:0035335(peptidyl-tyrosine dephosphorylation);GO:0016311(dephosphorylation);GO:0006470(protein dephosphorylation);GO:0001706(endoderm formation);GO:0000188(inactivation of MAPK activity);GO:0017017(MAP kinase tyrosine/serine/threonine phosphatase activity)…	04010(MAPK signaling pathway)
ciRNA109	25	39	15	43	43	53	4	20	20	9	0	2	3.59881	5.40988	2.05852	6.15479	6.57338	8.37128	0.630385	2.18768	2.94413	0.849619	0	0.200887	chr15	147909817	147910109	+	1	ciRNA	-	ENSSSCT00000010339	ENSSSCG00000009432	mRNA	chr15:147909816-147910127	NA	GO:0005622(intracellular);GO:0035556(intracellular signal transduction);GO:0016310(phosphorylation);GO:0016301(kinase activity)	00561(Glycerolipid metabolism);00564(Glycerophospholipid metabolism);04070(Phosphatidylinositol signaling system);05231(Choline metabolism in cancer)
ciRNA11	54	142	183	67	98	62	108	113	140	20	27	62	0.617741	1.56533	1.99576	0.762104	1.19053	0.77822	1.35258	0.982261	1.63776	0.15004	0.19562	0.494889	chr2	2989071	2992757	-	1	ciRNA	-	ENSSSCT00000014085	PPP6R3	mRNA	chr2:2989055-2992757	protein phosphatase 6 regulatory subunit 3 [Source:HGNC Symbol;Acc:HGNC:1173]	GO:0005886(plasma membrane);GO:0005829(cytosol);GO:0005654(nucleoplasm);GO:0043666(regulation of phosphoprotein phosphatase activity);GO:0019903(protein phosphatase binding)	NA
ciRNA110	0	0	0	0	2.5	0	0	0	0	0	0	0	0	0	0	0	0.210483	0	0	0	0	0	0	0	chr14	120438333	120438864	+	1	ciRNA	-	ENSSSCT00000011534	ABCC2	mRNA	chr14:120438332-120438899	ATP binding cassette subfamily C member 2 [Source:HGNC Symbol;Acc:HGNC:53]	GO:0046581(intercellular canaliculus);GO:0016324(apical plasma membrane);GO:0016021(integral component of membrane);GO:0016020(membrane);GO:0009986(cell surface);GO:0005887(integral component of plasma membrane);GO:0055085(transmembrane transport);GO:0032870(cellular response to hormone stimulus);GO:0015711(organic anion transport);GO:0006810(transport);GO:0042626(ATPase activity, coupled to tran…	02010(ABC transporters);04976(Bile secretion)
ciRNA111	0	3	0	6	11	0	4	17	11	49	10	30	0	0.338696	0	0.698974	1.3686	0	0.513063	1.51345	1.31791	3.76481	0.742028	2.45249	chrX	65862801	65863160	-	1	ciRNA	-	ENSSSCT00000013564	RPS4X	mRNA	chrX:65862800-65863160	ribosomal protein S4, X-linked [Source:HGNC Symbol;Acc:HGNC:10424]	GO:0070062(extracellular exosome);GO:0036464(cytoplasmic ribonucleoprotein granule);GO:0031012(extracellular matrix);GO:0030529(intracellular ribonucleoprotein complex);GO:0022627(cytosolic small ribosomal subunit);GO:0016020(membrane);GO:0015935(small ribosomal subunit);GO:0005925(focal adhesion);GO:0005844(polysome);GO:0005840(ribosome);GO:0005622(intracellular);GO:0045727(positive regulation o…	03010(Ribosome)
ciRNA112	34	44	34	140	134	159	148	221	152	0	0	0	5.03176	6.27478	4.79695	20.6013	21.0595	25.8188	23.979	24.8524	23.0035	0	0	0	chr7	53460776	53461060	+	1	ciRNA	-	ENSSSCT00000001974	ADAMTS7	mRNA	chr7:53460775-53461085	ADAM metallopeptidase with thrombospondin type 1 motif 7 [Source:HGNC Symbol;Acc:HGNC:223]	GO:0031012(extracellular matrix);GO:0009986(cell surface);GO:0005615(extracellular space);GO:0005578(proteinaceous extracellular matrix);GO:0071773(cellular response to BMP stimulus);GO:0071356(cellular response to tumor necrosis factor);GO:0071347(cellular response to interleukin-1);GO:0051603(proteolysis involved in cellular protein catabolic process);GO:0032331(negative regulation of chondrocy…	NA
ciRNA113	1	11	6.5	8	8.5	18	1	4	3	7.5	22.5	9	0.184991	1.96087	1.14633	1.47152	1.66983	3.6536	0.202525	0.562272	0.56752	0.909862	2.63615	1.16171	chr6	181324	181551	+	1	ciRNA	-	ENSSSCT00000027926	ENSSSCG00000029761	mRNA	chr6:181323-181573	NA	GO:0005739(mitochondrion);GO:0006144(purine nucleobase metabolic process);GO:0033971(hydroxyisourate hydrolase activity);GO:0016787(hydrolase activity)	00230(Purine metabolism)
ciRNA114	1	0	1	28.5	13.5	28	23	61.3333	35.5	7	12.5	0	0.187458	0	0.17871	5.3122	2.68744	5.75916	4.72018	8.73646	6.8052	0.860528	1.48406	0	chr6	397293	397517	+	1	ciRNA	-	ENSSSCT00000031647	FANCA	mRNA	chr6:397292-397543	Fanconi anemia complementation group A [Source:HGNC Symbol;Acc:HGNC:3582]	GO:0043240(Fanconi anaemia nuclear complex);GO:0005634(nucleus);GO:2000348(regulation of CD40 signaling pathway);GO:0051090(regulation of sequence-specific DNA binding transcription factor activity);GO:0050727(regulation of inflammatory response);GO:0045589(regulation of regulatory T cell differentiation);GO:0042127(regulation of cell proliferation);GO:0008585(female gonad development);GO:0008584…	03460(Fanconi anemia pathway)
ciRNA115	1.5	5.5	12	4	3.5	7.5	5	10.5	10.5	0	4.5	0	0.238743	0.843544	1.82082	0.633033	0.591575	1.30978	0.871239	1.26989	1.70899	0	0.453617	0	chr6	13295219	13295483	-	1	ciRNA	-	ENSSSCT00000024246	ENSSSCG00000025121	mRNA	chr6:13295191-13295483	NA	GO:0005759(mitochondrial matrix);GO:0055114(oxidation-reduction process);GO:0016491(oxidoreductase activity)	NA
ciRNA116	30.6667	26.3333	36.6667	31	25.3333	32	16	19.3333	32.6667	72.6667	59.6667	41.3333	4.60306	3.80882	5.24682	4.62666	4.03807	5.2702	2.62922	2.20507	5.0141	7.15283	5.67216	4.32896	chr6	47654993	47655273	+	1	ciRNA	-	ENSSSCT00000003437	PPP5C	mRNA	chr6:47654992-47655293	protein phosphatase 5 catalytic subunit [Source:HGNC Symbol;Acc:HGNC:9322]	GO:0043234(protein complex);GO:0043231(intracellular membrane-bounded organelle);GO:0005829(cytosol);GO:0043278(response to morphine);GO:0043123(positive regulation of I-kappaB kinase/NF-kappaB signaling);GO:0007165(signal transduction);GO:0006470(protein dephosphorylation);GO:0043531(ADP binding);GO:0042802(identical protein binding);GO:0016787(hydrolase activity);GO:0005524(ATP binding);GO:0004…	04010(MAPK signaling pathway)
ciRNA117	0	4	3	9	2	5	0	0.5	5	0	0	0	0	0.829459	0.615455	1.92575	0.457048	1.18059	0	0.081759	1.10029	0	0	0	chr5	19138887	19139082	-	1	ciRNA	-	ENSSSCT00000000295	MAP3K12	mRNA	chr5:19138881-19139082	mitogen-activated protein kinase kinase kinase 12 [Source:HGNC Symbol;Acc:HGNC:6851]	GO:0030426(growth cone);GO:0030424(axon);GO:0005886(plasma membrane);GO:0005829(cytosol);GO:0005737(cytoplasm);GO:2000672(negative regulation of motor neuron apoptotic process);GO:0046777(protein autophosphorylation);GO:0018107(peptidyl-threonine phosphorylation);GO:0018105(peptidyl-serine phosphorylation);GO:0016572(histone phosphorylation);GO:0016310(phosphorylation);GO:0007254(JNK cascade);GO:…	04010(MAPK signaling pathway)
ciRNA118	0	0	12	35	25	17	29	14	32	0	0	0	0	0	1.61377	4.90918	3.74504	2.63125	4.47858	1.50065	4.61608	0	0	0	chr5	69619846	69620144	+	1	ciRNA	-	ENSSSCT00000000809	ENSSSCG00000000745	mRNA	chr5:69619845-69620167	NA	GO:0005634(nucleus);GO:0006139(nucleobase-containing compound metabolic process);GO:0016818(hydrolase activity, acting on acid anhydrides, in phosphorus-containing anhydrides);GO:0016787(hydrolase activity);GO:0008026(ATP-dependent helicase activity);GO:0005524(ATP binding);GO:0004386(helicase activity);GO:0004003(ATP-dependent DNA helicase activity);GO:0003677(DNA binding);GO:0003676(nucleic aci…	NA
ciRNA119	52	66	19	33	10	32	7	34	43	147	34	103	3.1422	3.84308	1.09453	1.98276	0.641701	2.12167	0.46308	1.56115	2.6571	5.8252	1.30121	4.34281	chr5	81690837	81691534	+	1	ciRNA	-	ENSSSCT00000029955	PFKM	mRNA	chr5:81690836-81691571	phosphofructokinase, muscle [Source:HGNC Symbol;Acc:HGNC:8877]	GO:0097228(sperm principal piece);GO:0070062(extracellular exosome);GO:0016324(apical plasma membrane);GO:0005945(6-phosphofructokinase complex);GO:0005829(cytosol);GO:0005737(cytoplasm);GO:0093001(glycolysis from storage polysaccharide through glucose-1-phosphate);GO:0061621(canonical glycolysis);GO:0061615(glycolytic process through fructose-6-phosphate);GO:0051259(protein oligomerization);GO:0…	01200(Carbon metabolism);01230(Biosynthesis of amino acids);00010(Glycolysis / Gluconeogenesis);00030(Pentose phosphate pathway);00051(Fructose and mannose metabolism);00052(Galactose metabolism);03018(RNA degradation);04152(AMPK signaling pathway);05230(Central carbon metabolism in cancer)
ciRNA12	19.0833	15	31.3333	35.6667	24.3333	23.6667	19.3333	49.3333	35.6667	163.667	159	126.667	3.94557	2.98849	6.17601	7.33238	5.34268	5.36896	4.37613	7.75054	7.54097	22.1911	20.8204	18.2735	chr2	9251570	9251773	-	1	ciRNA	-	ENSSSCT00000014288	FADS1	mRNA	chr2:9251549-9251773	fatty acid desaturase 1 [Source:RefSeq peptide;Acc:NP_001106512]	GO:0016021(integral component of membrane);GO:0016020(membrane);GO:0055114(oxidation-reduction process);GO:0006629(lipid metabolic process);GO:0016491(oxidoreductase activity)	01212(Fatty acid metabolism);01040(Biosynthesis of unsaturated fatty acids)
ciRNA120	5	2	17	4	5	8	10	1	3	0	0	0	0.933142	0.359677	3.02463	0.742274	0.990945	1.63819	2.04317	0.141812	0.572542	0	0	0	chr3	19641068	19641293	+	1	ciRNA	-	ENSSSCT00000008564	GTF3C1	mRNA	chr3:19641067-19641312	general transcription factor IIIC subunit 1 [Source:HGNC Symbol;Acc:HGNC:4664]	GO:0030529(intracellular ribonucleoprotein complex);GO:0016020(membrane);GO:0005730(nucleolus);GO:0005634(nucleus);GO:0000127(transcription factor TFIIIC complex);GO:0042791(5S class rRNA transcription from RNA polymerase III type 1 promoter);GO:0009304(tRNA transcription);GO:0006384(transcription initiation from RNA polymerase III promoter);GO:0006359(regulation of transcription from RNA polymer…	NA
ciRNA121	69	64	91	105	46	91	49	0	23	62	26	0	1.88003	1.68035	2.36375	2.84466	1.33099	2.72053	1.46163	0	0.640843	1.10782	0.448668	0	chr3	19849723	19851270	-	1	ciRNA	-	ENSSSCT00000008566	IL4R	mRNA	chr3:19849701-19851270	interleukin-4 receptor subunit alpha precursor [Source:RefSeq peptide;Acc:NP_999505]	GO:0016021(integral component of membrane);GO:0016020(membrane);GO:0019221(cytokine-mediated signaling pathway);GO:0002532(production of molecular mediator involved in inflammatory response);GO:0004896(cytokine receptor activity);GO:0043235(receptor complex);GO:1901741(positive regulation of myoblast fusion);GO:0090197(positive regulation of chemokine secretion);GO:0045630(positive regulation of …	04630(Jak-STAT signaling pathway);04151(PI3K-Akt signaling pathway);04060(Cytokine-cytokine receptor interaction);04640(Hematopoietic cell lineage);05321(Inflammatiory bowel disease (IBD))
ciRNA122	3	12	0	0	0	7	1	0	3	0	2	0	0.655617	2.52706	0	0	0	1.67851	0.239252	0	0.670438	0	0.276819	0	chr9	49624390	49624582	+	1	ciRNA	-	ENSSSCT00000016440	SIDT2	mRNA	chr9:49624389-49624602	SID1 transmembrane family member 2 [Source:HGNC Symbol;Acc:HGNC:24272]	GO:0016021(integral component of membrane);GO:0016020(membrane);GO:0005765(lysosomal membrane);GO:0061178(regulation of insulin secretion involved in cellular response to glucose stimulus);GO:0044342(type B pancreatic cell proliferation);GO:0042593(glucose homeostasis);GO:0033227(dsRNA transport);GO:0009749(response to glucose);GO:0003323(type B pancreatic cell development);GO:0000902(cell morpho…	NA
ciRNA123	77	33	24	59	75	68	22	7	11	0	0	0	6.07048	2.50698	1.8038	4.62499	6.27907	5.88219	1.89881	0.419339	0.886816	0	0	0	chr9	50267294	50267828	-	1	ciRNA	-	ENSSSCT00000016449	FXYD6	mRNA	chr9:50267268-50267828	FXYD domain containing ion transport regulator 6 [Source:HGNC Symbol;Acc:HGNC:4030]	GO:0016021(integral component of membrane);GO:0016020(membrane);GO:0005887(integral component of plasma membrane);GO:0005886(plasma membrane);GO:2000649(regulation of sodium ion transmembrane transporter activity);GO:0034220(ion transmembrane transport);GO:0006811(ion transport);GO:0017080(sodium channel regulator activity);GO:0005216(ion channel activity)	NA
ciRNA124	181	216	136	107	164	89	298	388	314	43	109	108	2.72359	3.132	1.95095	1.60093	2.62065	1.46944	4.90915	4.43639	4.83172	0.424321	1.03879	1.13394	chr12	90272	93074	+	1	ciRNA	-	ENSSSCT00000018644	NARF	mRNA	chr12:90271-93101	nuclear prelamin A recognition factor [Source:HGNC Symbol;Acc:HGNC:29916]	GO:0031981(nuclear lumen);GO:0005730(nucleolus);GO:0005638(lamin filament);GO:0005634(nucleus);GO:0005521(lamin binding)	NA
ciRNA125	28.2	38	89	34	26	95	18.5	57	28	0	54	14	0.585056	0.759691	1.76029	0.701381	0.572827	2.16257	0.420192	0.898585	0.59404	0	0.709544	0.202666	chr12	1203729	1205761	-	1	ciRNA	-	ENSSSCT00000023942	BAHCC1	mRNA	chr12:1203708-1205761	BAH domain and coiled-coil containing 1 [Source:HGNC Symbol;Acc:HGNC:29279]	GO:0005677(chromatin silencing complex);GO:0000785(chromatin);GO:0031507(heterochromatin assembly);GO:0006342(chromatin silencing);GO:0003682(chromatin binding);GO:0000976(transcription regulatory region sequence-specific DNA binding)	NA
ciRNA126	1949.33	1663	1406	631.5	661	700	935	2072	659	895	554	479	174.934	143.809	120.287	56.3492	62.9929	68.9261	91.8602	141.291	60.4759	52.6713	31.4873	29.9935	chr12	5578854	5579323	+	1	ciRNA	-	ENSSSCT00000018727	H3F3A	mRNA	chr12:5578853-5579323	H3 histone family member 3A [Source:HGNC Symbol;Acc:HGNC:4764]	GO:0070062(extracellular exosome);GO:0043234(protein complex);GO:0005694(chromosome);GO:0005634(nucleus);GO:0001740(Barr body);GO:0000788(nuclear nucleosome);GO:0000786(nucleosome);GO:0000784(nuclear chromosome, telomeric region);GO:0000228(nuclear chromosome);GO:1902340(negative regulation of chromosome condensation);GO:0090230(regulation of centromere complex assembly);GO:0048477(oogenesis);GO:…	05202(Transcriptional misregulation in cancers);05322(Systemic lupus erythematosus);05034(Alcoholism)
ciRNA127	13	2	0	41	18	30	50	25.3333	54	0	0	0	1.64166	0.243374	0	5.14813	2.41387	4.15679	6.91253	2.4309	6.97336	0	0	0	chr12	22891428	22891761	+	1	ciRNA	-	ENSSSCT00000029526	ENSSSCG00000021018	mRNA	chr12:22891427-22891797	NA	NA	NA
ciRNA128	0	0	0	2	2	9	0	0	6	0	14	0	0	0	0	0.366275	0.391185	1.81882	0	0	1.13008	0	1.63311	0	chrX	58591315	58591543	+	1	ciRNA	-	ENSSSCT00000013522	MSN	mRNA	chrX:58591314-58591572	moesin [Source:HGNC Symbol;Acc:HGNC:7373]	GO:0072562(blood microparticle);GO:0071944(cell periphery);GO:0070062(extracellular exosome);GO:0048471(perinuclear region of cytoplasm);GO:0045177(apical part of cell);GO:0043209(myelin sheath);GO:0031982(vesicle);GO:0031143(pseudopodium);GO:0030175(filopodium);GO:0019898(extrinsic component of membrane);GO:0016324(apical plasma membrane);GO:0016323(basolateral plasma membrane);GO:0005925(focal …	04810(Regulation of actin cytoskeleton);04670(Leukocyte transendothelial migration);05205(Proteoglycans in cancer);05162(Measles)
ciRNA129	5	15	11	29	21	39	34	24	51	64.5	44	46	0.656978	1.89923	1.3779	3.78883	2.93023	5.62268	4.89088	2.39623	6.85267	5.55781	3.6616	4.21737	chrX	140190024	140190344	-	1	ciRNA	-	ENSSSCT00000013934	ENSSSCG00000012745	mRNA	chrX:140189996-140190344	NA	GO:0005634(nucleus);GO:0032392(DNA geometric change);GO:0008301(DNA binding, bending);GO:0003677(DNA binding);GO:0000400(four-way junction DNA binding)	NA
ciRNA13	50	39	29.5	56.5	58.5	55.5	57.5	106	50.5	202	115.5	145.5	7.19761	5.40988	4.04842	8.08711	8.94285	8.76615	9.06178	11.5947	7.43393	19.0692	10.5302	14.6145	chr2	149484428	149484720	-	1	ciRNA	-	ENSSSCT00000015725	HDAC3	mRNA	chr2:149484408-149484720	histone deacetylase 3 [Source:HGNC Symbol;Acc:HGNC:4854]	GO:0017053(transcriptional repressor complex);GO:0005886(plasma membrane);GO:0005876(spindle microtubule);GO:0005829(cytosol);GO:0005794(Golgi apparatus);GO:0005737(cytoplasm);GO:0005654(nucleoplasm);GO:0005634(nucleus);GO:0071498(cellular response to fluid shear stress);GO:0070932(histone H3 deacetylation);GO:0051225(spindle assembly);GO:0046329(negative regulation of JNK cascade);GO:0045944(pos…	04919(Thyroid hormone signaling pathway);05203(Viral carcinogenesis);05034(Alcoholism)
ciRNA130	18	16	12	12	16	6	54	62	44	0	19	11	3.53118	3.02463	2.24427	2.34075	3.33326	1.29151	11.5976	9.24219	8.82692	0	2.36069	1.50572	chr7	43555334	43555548	-	1	ciRNA	-	ENSSSCT00000001847	CUL7	mRNA	chr7:43555275-43555548	cullin 7 [Source:HGNC Symbol;Acc:HGNC:21024]	GO:1990393(3M complex);GO:0048471(perinuclear region of cytoplasm);GO:0031467(Cul7-RING ubiquitin ligase complex);GO:0005813(centrosome);GO:0005794(Golgi apparatus);GO:0005737(cytoplasm);GO:0050775(positive regulation of dendrite morphogenesis);GO:0016567(protein ubiquitination);GO:0007088(regulation of mitotic nuclear division);GO:0006511(ubiquitin-dependent protein catabolic process);GO:0001890…	NA
ciRNA131	6	0	0	0	0	0	3	0	2	49	0	0	0.769204	0	0	0	0	0	0.421055	0	0.262198	4.11955	0	0	chr7	80355331	80355659	+	1	ciRNA	-	ENSSSCT00000002235	ENSSSCG00000001997	mRNA	chr7:80355330-80355659	NA	GO:0016311(dephosphorylation);GO:0016791(phosphatase activity)	NA
ciRNA132	1.5	7	6	0.5	1	13.5	23	40	58	100.5	14	4	0.442427	1.98954	1.68712	0.146638	0.313222	4.36899	7.42686	8.9649	17.4939	19.4392	2.61526	0.823215	chr7	104474373	104474515	+	1	ciRNA	-	ENSSSCT00000022285	ENSSSCG00000021606	mRNA	chr7:104474372-104474538	NA	GO:0016021(integral component of membrane);GO:0016020(membrane);GO:0055085(transmembrane transport)	NA
ciRNA133	1.5	2	2	0.5	1	9.5	22	52	25	30.5	0	4	0.442427	0.56844	0.562374	0.146638	0.313222	3.07448	7.10395	11.6544	7.54048	5.89947	0	0.823215	chr7	104611785	104611927	-	1	ciRNA	-	ENSSSCT00000030716	ENSSSCG00000024255	mRNA	chr7:104611761-104611927	NA	GO:0016021(integral component of membrane);GO:0016020(membrane)	NA
ciRNA134	0	0	0	23	17	33	16	24	33	0	0	0	0	0	0	1.84433	1.45591	2.92009	1.41264	1.47072	2.72149	0	0	0	chr6	55510628	55511150	+	1	ciRNA	-	ENSSSCT00000003679	NLRP8	mRNA	chr6:55510627-55511176	NLR family pyrin domain containing 8 [Source:HGNC Symbol;Acc:HGNC:22940]	GO:0070997(neuron death);GO:0005524(ATP binding);GO:0000166(nucleotide binding)	NA
ciRNA135	74	49	54	82	71	48	54	85	44	29	4	19	7.20825	4.59938	5.01461	7.94216	7.34443	5.13023	5.75863	6.29148	4.38288	1.8525	0.246772	1.29138	chr6	58097466	58097898	-	1	ciRNA	-	ENSSSCT00000003708	INTS11	mRNA	chr6:58097431-58097898	integrator complex subunit 11 [Source:HGNC Symbol;Acc:HGNC:26052]	GO:0072562(blood microparticle);GO:0032039(integrator complex);GO:0005829(cytosol);GO:0005654(nucleoplasm);GO:0016180(snRNA processing)	NA
ciRNA136	0	0	0	0	0	0	6	0	0	0	0	0	0	0	0	0	0	0	1.60147	0	0	0	0	0	chr6	96884311	96884483	-	1	ciRNA	-	ENSSSCT00000025549	ENSSSCG00000023052	mRNA	chr6:96881580-96884483	NA	GO:0005694(chromosome);GO:0051276(chromosome organization);GO:0005524(ATP binding)	NA
ciRNA137	0	0	6	2	19	11	21	22	7	61	4	0	0	0	0.806885	0.280525	2.84623	1.70257	3.24311	2.35816	1.00977	5.64297	0.357365	0	chr5	23515660	23515958	+	1	ciRNA	-	ENSSSCT00000000434	RBMS2	mRNA	chr5:23515659-23515990	RNA binding motif single stranded interacting protein 2 [Source:HGNC Symbol;Acc:HGNC:9909]	GO:0003723(RNA binding);GO:0003676(nucleic acid binding);GO:0000166(nucleotide binding)	NA
ciRNA138	16	22	66	4	14	29	305	501	355.5	54	185	218	2.67797	3.54824	10.5311	0.66569	2.48837	5.32575	55.8872	63.7175	60.8463	5.9271	19.6107	25.4592	chr5	84017100	84017351	-	1	ciRNA	-	ENSSSCT00000000926	HSP90B1	mRNA	chr5:84017083-84017351	endoplasmin precursor [Source:RefSeq peptide;Acc:NP_999268]	GO:0070062(extracellular exosome);GO:0048471(perinuclear region of cytoplasm);GO:0034663(endoplasmic reticulum chaperone complex);GO:0031012(extracellular matrix);GO:0030496(midbody);GO:0016020(membrane);GO:0005925(focal adhesion);GO:0005886(plasma membrane);GO:0005829(cytosol);GO:0005789(endoplasmic reticulum membrane);GO:0005788(endoplasmic reticulum lumen);GO:0005783(endoplasmic reticulum);GO:…	NA
ciRNA139	9	10	0	16	8.5	10	15	20	4	0	0	0	1.43789	1.53953	0	2.54172	1.44212	1.75299	2.62362	2.42799	0.653508	0	0	0	chr4	121285503	121285766	+	1	ciRNA	-	ENSSSCT00000007482	SORT1	mRNA	chr4:121285502-121285791	sortilin 1 [Source:HGNC Symbol;Acc:HGNC:11186]	GO:0048471(perinuclear region of cytoplasm);GO:0031410(cytoplasmic vesicle);GO:0030659(cytoplasmic vesicle membrane);GO:0030140(trans-Golgi network transport vesicle);GO:0030136(clathrin-coated vesicle);GO:0016021(integral component of membrane);GO:0016020(membrane);GO:0009986(cell surface);GO:0005905(clathrin-coated pit);GO:0005886(plasma membrane);GO:0005829(cytosol);GO:0005794(Golgi apparatus)…	NA
ciRNA14	178	191	194	182	141	83	25	25	20	27	137	6	32.2218	33.3172	33.4794	32.7588	27.1051	16.4856	4.95447	3.43879	3.70228	3.20521	15.7068	0.757852	chr1	146922224	146922456	-	1	ciRNA	-	ENSSSCT00000005288	THBS1	mRNA	chr1:146922197-146922456	thrombospondin 1 [Source:HGNC Symbol;Acc:HGNC:11785]	GO:0070062(extracellular exosome);GO:0031091(platelet alpha granule);GO:0031012(extracellular matrix);GO:0030141(secretory granule);GO:0009986(cell surface);GO:0009897(external side of plasma membrane);GO:0005615(extracellular space);GO:0005577(fibrinogen complex);GO:0005576(extracellular region);GO:2001027(negative regulation of endothelial cell chemotaxis);GO:2000379(positive regulation of reac…	04015(Rap1 signaling pathway);04350(TGF-beta signaling pathway);04151(PI3K-Akt signaling pathway);04512(ECM-receptor interaction);04145(Phagosome);04115(p53 signaling pathway);04510(Focal adhesion);05206(MicroRNAs in cancer);05205(Proteoglycans in cancer);05219(Bladder cancer);05144(Malaria)
ciRNA140	43	38	20	33	21	4	207	137.333	130	106	236	130	2.86065	2.43604	1.26845	2.18292	1.4836	0.291981	15.0763	6.94238	8.844	4.62451	9.94365	6.03453	chr3	16408486	16409119	+	1	ciRNA	-	ENSSSCT00000008477	SBDS	mRNA	chr3:16408485-16409126	Shwachman-Bodian-Diamond syndrome [Source:HGNC Symbol;Acc:HGNC:19440]	GO:0005829(cytosol);GO:0005737(cytoplasm);GO:0005730(nucleolus);GO:0005634(nucleus);GO:0000922(spindle pole);GO:0048539(bone marrow development);GO:0042256(mature ribosome assembly);GO:0042254(ribosome biogenesis);GO:0030595(leukocyte chemotaxis);GO:0030282(bone mineralization);GO:0008283(cell proliferation);GO:0007052(mitotic spindle organization);GO:0006364(rRNA processing);GO:0001833(inner cel…	03008(Ribosome biogenesis in eukaryotes)
ciRNA141	5	13	0	11	7	0	16	3	16	60	10	8	0.893602	2.23884	0	1.95476	1.32854	0	3.13056	0.407409	2.92417	7.03216	1.13191	0.997625	chr3	58279371	58279606	-	1	ciRNA	-	ENSSSCT00000008969	INPP4A	mRNA	chr3:58279329-58279606	type I inositol-3,4-bisphosphate 4-phosphatase [Source:RefSeq peptide;Acc:NP_001137402]	GO:0005737(cytoplasm);GO:0036092(phosphatidylinositol-3-phosphate biosynthetic process);GO:0007165(signal transduction);GO:0016316(phosphatidylinositol-3,4-bisphosphate 4-phosphatase activity)	00562(Inositol phosphate metabolism);04070(Phosphatidylinositol signaling system)
ciRNA142	1	0	0	0	0	0	1	0	4	0	0	0	0.204748	0	0	0	0	0	0.224154	0	0.837505	0	0	0	chr2	2781912	2782117	+	1	ciRNA	-	ENSSSCT00000014077	MRPL21	mRNA	chr2:2781911-2784123	mitochondrial ribosomal protein L21 [Source:HGNC Symbol;Acc:HGNC:14479]	GO:0005840(ribosome);GO:0005762(mitochondrial large ribosomal subunit);GO:0005739(mitochondrion);GO:0005622(intracellular);GO:0006412(translation);GO:0003735(structural constituent of ribosome);GO:0003723(RNA binding)	NA
ciRNA143	15	6	0	0	0	0	24	9	3	0	22	4	4.1351	1.59386	0	0	0	0	7.24325	1.88527	0.845716	0	3.84109	0.76941	chr2	8279617	8279769	+	1	ciRNA	-	ENSSSCT00000027556	WDR74	mRNA	chr2:8279616-8280525	WD repeat domain 74 [Source:HGNC Symbol;Acc:HGNC:25529]	GO:0030687(preribosome, large subunit precursor);GO:0005730(nucleolus);GO:0005634(nucleus);GO:0042273(ribosomal large subunit biogenesis)	NA
ciRNA144	6.5	2.5	7	5	3	5.5	6	15	4	0	1	4	0.50304	0.186438	0.516456	0.384756	0.246554	0.467035	0.508356	0.882097	0.316562	0	0.0490147	0.216	chr2	16501299	16501843	+	1	ciRNA	-	ENSSSCT00000029405	ENSSSCG00000025402	mRNA	chr2:16501298-16502143	NA	GO:0043547(positive regulation of GTPase activity);GO:0017112(Rab guanyl-nucleotide exchange factor activity)	NA
ciRNA145	81	35	43	80	58	78	120	184	110	275	212	251	5.34651	2.22617	2.70582	5.25051	4.06551	5.64907	8.67149	9.22866	7.42483	11.9037	8.86254	11.5601	chr2	59462696	59463334	-	1	ciRNA	-	ENSSSCT00000015175	RPL18A	mRNA	chr2:59462692-59463334	ribosomal protein L18a [Source:HGNC Symbol;Acc:HGNC:10311]	GO:0022625(cytosolic large ribosomal subunit);GO:0016020(membrane);GO:0005840(ribosome);GO:0006412(translation);GO:0003735(structural constituent of ribosome);GO:0003723(RNA binding)	NA
ciRNA146	12	3	0	12	0	3	4	0	6	70	26	17	2.17226	0.523306	0	2.15992	0	0.595866	0.792716	0	1.11068	8.30981	2.98085	2.14725	chr2	60664230	60664462	+	1	ciRNA	-	ENSSSCT00000015139	CHERP	mRNA	chr2:60664229-60664508	calcium homeostasis endoplasmic reticulum protein [Source:HGNC Symbol;Acc:HGNC:16930]	GO:0048471(perinuclear region of cytoplasm);GO:0016020(membrane);GO:0005737(cytoplasm);GO:0051533(positive regulation of NFAT protein import into nucleus);GO:0051209(release of sequestered calcium ion into cytosol);GO:0008285(negative regulation of cell proliferation);GO:0006874(cellular calcium ion homeostasis);GO:0006396(RNA processing);GO:0044325(ion channel binding);GO:0003723(RNA binding);GO…	NA
ciRNA147	8.08333	3.66667	0	6.16667	2.33333	9.33333	7.53333	7.25	24.4	0	8.66667	0.333333	1.17972	0.515661	0	0.894881	0.361632	1.49459	1.20366	0.80401	3.64155	0	0.801083	0.0339446	chr1	9361455	9361743	-	1	ciRNA	-	ENSSSCT00000004474	PNLDC1	mRNA	chr1:9361435-9361743	PARN like, ribonuclease domain containing 1 [Source:HGNC Symbol;Acc:HGNC:21185]	GO:0005783(endoplasmic reticulum);GO:0090503(RNA phosphodiester bond hydrolysis, exonucleolytic);GO:0000289(nuclear-transcribed mRNA poly(A) tail shortening);GO:0004535(poly(A)-specific ribonuclease activity);GO:0003676(nucleic acid binding)	NA
ciRNA148	0	0	3.33333	2	3.33333	0	2	1.33333	4.66667	0	0	2.66667	0	0	0.7245	0.453389	0.80704	0	0.499197	0.230988	1.088	0	0	0.424215	chr1	264044238	264044422	+	1	ciRNA	-	ENSSSCT00000005846	RUSC2	mRNA	chr1:264044237-264044447	RUN and SH3 domain containing 2 [Source:HGNC Symbol;Acc:HGNC:23625]	GO:0070062(extracellular exosome);GO:0031410(cytoplasmic vesicle);GO:0017137(Rab GTPase binding)	NA
ciRNA149	0	3	22	2	6	11	43	62	44	122	45	23	0	0.516654	3.74837	0.355411	1.13875	2.15707	8.41337	8.41979	8.04147	14.2987	5.09358	2.86817	chr1	264111965	264112200	-	1	ciRNA	-	ENSSSCT00000005852	ARHGEF39	mRNA	chr1:264111930-264112200	Rho guanine nucleotide exchange factor 39 [Source:HGNC Symbol;Acc:HGNC:25909]	GO:0005886(plasma membrane);GO:0043547(positive regulation of GTPase activity);GO:0035023(regulation of Rho protein signal transduction);GO:0030335(positive regulation of cell migration);GO:0005089(Rho guanyl-nucleotide exchange factor activity)	NA
ciRNA15	26	55	14	43	29	38	9	2	24	0	0	0	2.96386	6.0416	1.52145	4.87393	3.51062	4.75297	1.12319	0.173241	2.79772	0	0	0	chr1	205491657	205492026	+	1	ciRNA	-	ENSSSCT00000005577	KTN1	mRNA	chr1:205491656-205492066	kinectin 1 (kinesin receptor) [Source:RefSeq peptide;Acc:NP_001245232]	GO:0016021(integral component of membrane);GO:0016020(membrane);GO:0005783(endoplasmic reticulum);GO:0007018(microtubule-based movement);GO:0045296(cadherin binding);GO:0019894(kinesin binding);GO:0003723(RNA binding)	NA
ciRNA150	47	91	49	64	84	71	76	62	52	43	51	46	12.9566	24.1736	12.8776	17.5429	24.591	21.4759	22.9369	12.9874	14.6591	7.77367	8.90434	8.84822	chr10	73710599	73710751	+	1	ciRNA	-	ENSSSCT00000012219	PITRM1	mRNA	chr10:73710598-73710781	pitrilysin metallopeptidase 1 [Source:HGNC Symbol;Acc:HGNC:17663]	GO:0005759(mitochondrial matrix);GO:0005739(mitochondrion);GO:0006508(proteolysis);GO:0046872(metal ion binding);GO:0004222(metalloendopeptidase activity);GO:0003824(catalytic activity)	NA
ciRNA151	13	3	11	12	15	29	27	39	17	15	0	0	2.52679	0.561891	2.03828	2.31918	3.09613	6.18475	5.74536	5.76005	3.37897	1.91197	0	0	chr14	42036538	42036754	+	1	ciRNA	-	ENSSSCT00000010835	ENSSSCG00000009885	mRNA	chr14:42036537-42036777	NA	GO:0016567(protein ubiquitination);GO:0016740(transferase activity);GO:0004842(ubiquitin-protein transferase activity)	NA
ciRNA152	41	27.5	28.5	74.5	70.5	56.5	37.5	85	79.6667	44	68.5	18	6.06771	3.92174	4.02098	10.9629	11.0798	9.1746	6.07575	9.55863	12.0566	4.27029	6.4205	1.85873	chr14	80636711	80636995	-	1	ciRNA	-	ENSSSCT00000011253	PSAP	mRNA	chr14:80636688-80636995	prosaposin [Source:HGNC Symbol;Acc:HGNC:9498]	GO:0070062(extracellular exosome);GO:0043231(intracellular membrane-bounded organelle);GO:0005764(lysosome);GO:0005739(mitochondrion);GO:0005615(extracellular space);GO:1903206(negative regulation of hydrogen peroxide-induced cell death);GO:0071310(cellular response to organic substance);GO:0060742(epithelial cell differentiation involved in prostate gland development);GO:0060736(prostate gland g…	04142(Lysosome)
ciRNA153	0	9	10	9	2	14	18	21	25	0	20	35	0	1.61855	1.77919	1.67012	0.396378	2.86684	3.67771	2.97805	4.77119	0	2.36398	4.55773	chr6	25085762	25085987	-	1	ciRNA	-	ENSSSCT00000033715	HSF4	mRNA	chr6:25085761-25085987	heat shock transcription factor 4 [Source:HGNC Symbol;Acc:HGNC:5227]	GO:0005634(nucleus);GO:0006357(regulation of transcription from RNA polymerase II promoter);GO:0006355(regulation of transcription, DNA-templated);GO:0043565(sequence-specific DNA binding);GO:0003700(transcription factor activity, sequence-specific DNA binding);GO:0003677(DNA binding);GO:0016607(nuclear speck);GO:0070207(protein homotrimerization);GO:0048468(cell development);GO:0045944(positive …	NA
ciRNA154	179	133	81	712.333	690	770	1399	1786	1445.25	57	86	86	13.2454	9.48348	5.71402	52.4108	54.2203	62.5172	113.333	100.422	109.361	2.76598	4.03039	4.44031	chr6	45235479	45236048	-	1	ciRNA	-	ENSSSCT00000003340	ENSSSCG00000003007	mRNA	chr6:45235453-45236048	NA	GO:0055114(oxidation-reduction process);GO:0008152(metabolic process);GO:0016624(oxidoreductase activity, acting on the aldehyde or oxo group of donors, disulfide as acceptor)	NA
ciRNA155	64	6	34	57	14	33	65	199	74	70	108	30	8.17998	0.738972	4.14282	7.24391	1.90021	4.6279	9.09521	19.3268	9.67192	5.86723	8.74244	2.67545	chr6	50096548	50096877	-	1	ciRNA	-	ENSSSCT00000003500	FTL	mRNA	chr6:50096523-50096877	NA	GO:0005623(cell);GO:0006879(cellular iron ion homeostasis);GO:0006826(iron ion transport);GO:0046872(metal ion binding);GO:0008199(ferric iron binding)	04978(Mineral absorption)
ciRNA156	12	47	4	8	23	11	5	63	12	0	0	22	1.75742	6.63279	0.558469	1.16496	3.57703	1.7676	0.801661	7.01083	1.79715	0	0	2.24812	chr6	155191396	155191683	-	1	ciRNA	-	ENSSSCT00000004359	SZT2	mRNA	chr6:155191249-155191683	seizure threshold 2 homolog (mouse) [Source:HGNC Symbol;Acc:HGNC:29040]	GO:0070062(extracellular exosome);GO:0005777(peroxisome);GO:0021540(corpus callosum morphogenesis)	NA
ciRNA157	83	146	171	196	142	117	78	123	77	252	255	192	7.21809	12.2349	14.177	16.9483	13.114	11.1642	7.42619	8.12802	6.84769	14.3717	14.045	11.6506	chr5	24347487	24347971	+	1	ciRNA	-	ENSSSCT00000000457	ENSSSCG00000000423	mRNA	chr5:24347486-24347990	NA	GO:0016021(integral component of membrane);GO:0016020(membrane);GO:0005509(calcium ion binding)	NA
ciRNA158	25	9	0	77	46	70	57	167	125	0	7	0	3.48003	1.20723	0	10.6576	6.79991	10.6915	8.68652	17.6643	17.7935	0	0.617133	0	chr5	69626783	69627085	+	1	ciRNA	-	ENSSSCT00000000809	ENSSSCG00000000745	mRNA	chr5:69626782-69627109	NA	GO:0005634(nucleus);GO:0006139(nucleobase-containing compound metabolic process);GO:0016818(hydrolase activity, acting on acid anhydrides, in phosphorus-containing anhydrides);GO:0016787(hydrolase activity);GO:0008026(ATP-dependent helicase activity);GO:0005524(ATP binding);GO:0004386(helicase activity);GO:0004003(ATP-dependent DNA helicase activity);GO:0003677(DNA binding);GO:0003676(nucleic aci…	NA
ciRNA159	219	39	300	128	56	49	2445	4453	2403	2420	1983	1904.5	9.60185	1.64771	12.5394	5.58017	2.60736	2.35724	117.359	148.354	107.739	69.5808	55.0644	58.2633	chr5	84082909	84083870	-	1	ciRNA	-	ENSSSCT00000000926	HSP90B1	mRNA	chr5:84082879-84083870	endoplasmin precursor [Source:RefSeq peptide;Acc:NP_999268]	GO:0070062(extracellular exosome);GO:0048471(perinuclear region of cytoplasm);GO:0034663(endoplasmic reticulum chaperone complex);GO:0031012(extracellular matrix);GO:0030496(midbody);GO:0016020(membrane);GO:0005925(focal adhesion);GO:0005886(plasma membrane);GO:0005829(cytosol);GO:0005789(endoplasmic reticulum membrane);GO:0005788(endoplasmic reticulum lumen);GO:0005783(endoplasmic reticulum);GO:…	NA
ciRNA16	3.5	11	0	3	5.5	0	12	14.5	6.5	0	0	4	0.806683	2.44305	0	0.687516	1.34617	0	3.02791	2.53944	1.53199	0	0	0.643277	chr1	264295582	264295764	+	1	ciRNA	-	ENSSSCT00000005864	ENSSSCG00000005325	mRNA	chr1:264295581-264295796	NA	GO:0016021(integral component of membrane);GO:0016020(membrane);GO:0005886(plasma membrane)	NA
ciRNA160	1	1	0	56	48	105	116	161	101	0	5	0	0.111878	0.107808	0	6.22958	5.70279	12.8894	14.2079	13.6869	11.5551	0	0.354284	0	chr5	110741792	110742168	-	1	ciRNA	-	ENSSSCT00000001066	MOV10L1	mRNA	chr5:110741769-110742168	Mov10 RISC complex RNA helicase like 1 [Source:HGNC Symbol;Acc:HGNC:7201]	GO:0007283(spermatogenesis);GO:0007281(germ cell development)	NA
ciRNA161	0	0	0	11	2	4	12	39	10	0	0	0	0	0	0	2.68211	0.520822	1.07625	3.22156	7.26704	2.50765	0	0	0	chr4	106522183	106522354	-	1	ciRNA	-	ENSSSCT00000024550	ENSSSCG00000026844	mRNA	chr4:106521783-106522354	NA	NA	NA
ciRNA162	7	0	0	15	13	10	2	1	1	0	0	3	1.72659	0	0	3.67881	3.40514	2.70637	0.540067	0.187424	0.252231	0	0	0.516315	chr2	3972239	3972409	-	1	ciRNA	-	ENSSSCT00000026537	SSH3	mRNA	chr2:3972216-3972409	slingshot protein phosphatase 3 [Source:HGNC Symbol;Acc:HGNC:30581]	GO:0005856(cytoskeleton);GO:0005737(cytoplasm);GO:0050770(regulation of axonogenesis);GO:0035335(peptidyl-tyrosine dephosphorylation);GO:0016311(dephosphorylation);GO:0010591(regulation of lamellipodium assembly);GO:0008064(regulation of actin polymerization or depolymerization);GO:0006470(protein dephosphorylation);GO:0016791(phosphatase activity);GO:0008138(protein tyrosine/serine/threonine pho…	NA
ciRNA163	13.5	18	6.5	16	17.5	8	34	56.5	42.5	5	0.5	0	1.67471	2.15171	0.768716	1.97357	2.3054	1.08892	4.61757	5.32588	5.39144	0.406762	0.0392839	0	chr2	69312926	69313265	-	1	ciRNA	-	ENSSSCT00000014923	DNMT1	mRNA	chr2:69312895-69313265	DNA methyltransferase 1 [Source:HGNC Symbol;Acc:HGNC:2976]	GO:0005721(pericentric heterochromatin);GO:0005657(replication fork);GO:0005634(nucleus);GO:0000792(heterochromatin);GO:0090309(positive regulation of methylation-dependent chromatin silencing);GO:0090116(C-5 methylation of cytosine);GO:0071230(cellular response to amino acid stimulus);GO:0051573(negative regulation of histone H3-K9 methylation);GO:0051571(positive regulation of histone H3-K4 met…	00270(Cysteine and methionine metabolism);05206(MicroRNAs in cancer)
ciRNA164	8.08333	3.66667	0	6.16667	2.33333	9.33333	7.53333	7.25	24.4	0	8.66667	0.333333	1.21331	0.530342	0	0.920358	0.371928	1.53714	1.23792	0.8269	3.74523	0	0.823889	0.034911	chr1	9361463	9361743	-	1	ciRNA	-	ENSSSCT00000004474	PNLDC1	mRNA	chr1:9361435-9361743	PARN like, ribonuclease domain containing 1 [Source:HGNC Symbol;Acc:HGNC:21185]	GO:0005783(endoplasmic reticulum);GO:0090503(RNA phosphodiester bond hydrolysis, exonucleolytic);GO:0000289(nuclear-transcribed mRNA poly(A) tail shortening);GO:0004535(poly(A)-specific ribonuclease activity);GO:0003676(nucleic acid binding)	NA
ciRNA165	0	0	0	0	0	0	0	8	0	0	0	0	0	0	0	0	0	0	0	1.16016	0	0	0	0	chr1	118506275	118506495	-	1	ciRNA	-	ENSSSCT00000005031	ENSSSCG00000004554	mRNA	chr1:118506246-118506495	NA	GO:0051726(regulation of cell cycle);GO:0006974(cellular response to DNA damage stimulus)	NA
ciRNA166	20	14	4	37	25	12	116	152	60	68	65	20	1.89139	1.2758	0.360626	3.4792	2.51069	1.24517	12.0098	10.9227	5.80245	4.21719	3.89315	1.31973	chr8	297603	298048	-	1	ciRNA	-	ENSSSCT00000009494	TACC3	mRNA	chr8:297567-298048	transforming acidic coiled-coil containing protein 3 [Source:HGNC Symbol;Acc:HGNC:11524]	GO:0015630(microtubule cytoskeleton);GO:0005737(cytoplasm);GO:1902850(microtubule cytoskeleton organization involved in mitosis);GO:0060236(regulation of mitotic spindle organization);GO:0021987(cerebral cortex development);GO:0008283(cell proliferation);GO:0007091(metaphase/anaphase transition of mitotic cell cycle);GO:0000226(microtubule cytoskeleton organization)	03013(RNA transport)
ciRNA167	139	34	53	35	14	38	34	48	61	90	207	76	5.08477	1.19851	1.84832	1.27307	0.543859	1.52524	1.36164	1.33424	2.28189	2.15905	4.79583	1.93987	chr13	38423823	38424975	-	1	ciRNA	-	ENSSSCT00000025213	TKT	mRNA	chr13:38423786-38424975	transketolase [Source:HGNC Symbol;Acc:HGNC:11834]	GO:0070062(extracellular exosome);GO:0043209(myelin sheath);GO:0031982(vesicle);GO:0016607(nuclear speck);GO:0016604(nuclear body);GO:0005654(nucleoplasm);GO:0046166(glyceraldehyde-3-phosphate biosynthetic process);GO:0040008(regulation of growth);GO:0008152(metabolic process);GO:0048037(cofactor binding);GO:0046872(metal ion binding);GO:0042803(protein homodimerization activity);GO:0016740(trans…	01200(Carbon metabolism);01230(Biosynthesis of amino acids);00030(Pentose phosphate pathway);00900(Terpenoid backbone biosynthesis)
ciRNA168	0	0	0	0	0	1	0	3.33333	0.666667	0	0	0	0	0	0	0	0	0.251516	0	0.580607	0.156274	0	0	0	chr13	78380412	78380595	+	1	ciRNA	-	ENSSSCT00000024978	ENSSSCG00000028031	mRNA	chr13:78380411-78380623	NA	GO:0016787(hydrolase activity)	NA
ciRNA169	0	0	0	0	0	1	0	3.33333	0.666667	0	0	0	0	0	0	0	0	0.251516	0	0.580607	0.156274	0	0	0	chr13	78560499	78560682	-	1	ciRNA	-	ENSSSCT00000012705	ENSSSCG00000011608	mRNA	chr13:78560470-78560682	NA	GO:0016787(hydrolase activity)	NA
ciRNA17	47	24	19	47	39	29	121	177	124	0	0	54	4.14721	2.04068	1.5983	4.12366	3.65447	2.80772	11.6888	11.8677	11.1889	0	0	3.32472	chr9	7355578	7356055	-	1	ciRNA	-	ENSSSCT00000016153	NUMA1	mRNA	chr9:7355557-7356055	nuclear mitotic apparatus protein 1 [Source:HGNC Symbol;Acc:HGNC:8059]	GO:0097431(mitotic spindle pole);GO:0072686(mitotic spindle);GO:0070062(extracellular exosome);GO:0061673(mitotic spindle astral microtubule);GO:0045177(apical part of cell);GO:0016363(nuclear matrix);GO:0005938(cell cortex);GO:0005876(spindle microtubule);GO:0005829(cytosol);GO:0005813(centrosome);GO:0005654(nucleoplasm);GO:0005634(nucleus);GO:0000922(spindle pole);GO:0000139(Golgi membrane);GO:…	NA
ciRNA170	29	50	10	27	58	60	119	247	185	338	163	205.5	0.832083	1.38243	0.273536	0.770298	1.76725	1.88894	3.73803	5.38519	5.42812	6.35988	2.96206	4.11418	chr12	5514638	5516107	+	1	ciRNA	-	ENSSSCT00000030348	WBP2	mRNA	chr12:5514637-5516134	WW domain binding protein 2 [Source:HGNC Symbol;Acc:HGNC:12738]	GO:0000790(nuclear chromatin);GO:0071442(positive regulation of histone H3-K14 acetylation);GO:0071391(cellular response to estrogen stimulus);GO:0045944(positive regulation of transcription from RNA polymerase II promoter);GO:0045815(positive regulation of gene expression, epigenetic);GO:0045184(establishment of protein localization);GO:0031490(chromatin DNA binding);GO:0001105(RNA polymerase II…	NA
ciRNA171	25	19	54	23	35	28	61	98	53	0	75	6	5.92388	4.33835	12.1985	5.41901	8.80716	7.27984	15.8243	17.6452	12.8425	0	11.2555	0.99202	chr12	55842947	55843124	-	1	ciRNA	-	ENSSSCT00000019569	PER1	mRNA	chr12:55842922-55843124	period circadian clock 1 [Source:HGNC Symbol;Acc:HGNC:8845]	GO:0005829(cytosol);GO:0005737(cytoplasm);GO:0005654(nucleoplasm);GO:0005634(nucleus);GO:2000323(negative regulation of glucocorticoid receptor signaling pathway);GO:0097167(circadian regulation of translation);GO:0070932(histone H3 deacetylation);GO:0051591(response to cAMP);GO:0045944(positive regulation of transcription from RNA polymerase II promoter);GO:0045892(negative regulation of transcr…	04710(Circadian rhythm);04713(Circadian entrainment);05168(Herpes simplex infection)
ciRNA172	7	21	9	19	22	9	39	117	64	15	68	58	1.44728	4.18389	1.77396	3.90603	4.83037	2.04172	8.82771	18.3813	13.5315	2.03381	8.90434	8.36733	chr11	7646780	7646983	-	1	ciRNA	-	ENSSSCT00000010229	HSPH1	mRNA	chr11:7646751-7646983	heat shock protein 105 kDa [Source:RefSeq peptide;Acc:NP_001090973]	GO:0070062(extracellular exosome);GO:0005874(microtubule);GO:0005829(cytosol);GO:0005737(cytoplasm);GO:0005654(nucleoplasm);GO:0005634(nucleus);GO:2001234(negative regulation of apoptotic signaling pathway);GO:1903753(negative regulation of p38MAPK cascade);GO:1903751(negative regulation of intrinsic apoptotic signaling pathway in response to hydrogen peroxide);GO:1903748(negative regulation of e…	04141(Protein processing in endoplasmic reticulum)
ciRNA173	36	80	18	46	41	34	93	112	58	47	81	72	1.82941	3.91744	0.872019	2.3243	2.21255	1.89576	5.1739	4.32475	3.01401	1.56628	2.60693	2.55296	chr14	6719476	6720305	+	1	ciRNA	-	ENSSSCT00000010534	XPO7	mRNA	chr14:6719475-6720332	exportin 7 [Source:HGNC Symbol;Acc:HGNC:14108]	GO:0005737(cytoplasm);GO:0005643(nuclear pore);GO:0005634(nucleus);GO:0006886(intracellular protein transport);GO:0006611(protein export from nucleus);GO:0008536(Ran GTPase binding);GO:0005049(nuclear export signal receptor activity);GO:0005622(intracellular)	NA
ciRNA174	0	0	9	0	0	0	0	7	4	0	0	0	0	0	1.09332	0	0	0	0	0.677784	0.521227	0	0	0	chr14	60202438	60202768	+	1	ciRNA	-	ENSSSCT00000011121	RBM34	mRNA	chr14:60202437-60206126	RNA binding motif protein 34 [Source:HGNC Symbol;Acc:HGNC:28965]	GO:0005730(nucleolus);GO:0005634(nucleus);GO:0003723(RNA binding);GO:0003676(nucleic acid binding);GO:0000166(nucleotide binding)	NA
ciRNA175	41	27.5	28.5	74.5	70.5	52.5	37.5	85	79.6667	44	68.5	18	6.17607	3.99177	4.09278	11.1586	11.2777	8.6773	6.18424	9.72932	12.2719	4.34654	6.53515	1.89192	chr14	80636716	80636995	-	1	ciRNA	-	ENSSSCT00000011253	PSAP	mRNA	chr14:80636688-80636995	prosaposin [Source:HGNC Symbol;Acc:HGNC:9498]	GO:0070062(extracellular exosome);GO:0043231(intracellular membrane-bounded organelle);GO:0005764(lysosome);GO:0005739(mitochondrion);GO:0005615(extracellular space);GO:1903206(negative regulation of hydrogen peroxide-induced cell death);GO:0071310(cellular response to organic substance);GO:0060742(epithelial cell differentiation involved in prostate gland development);GO:0060736(prostate gland g…	04142(Lysosome)
ciRNA176	17.5	23	23	26.5	12.5	26	37.5	31	28	10	34	25	3.22321	4.0821	4.03853	4.85314	2.44491	5.25438	7.56152	4.33858	5.27372	1.20785	3.96613	3.21287	chrX	50891350	50891578	+	1	ciRNA	-	ENSSSCT00000013470	MAGED4B	mRNA	chrX:50891349-50891761	NA	NA	NA
ciRNA177	10	32	10	2	8	3	8	12	13	0	0	0	0.631407	1.94699	0.601942	0.125564	0.536416	0.20784	0.553002	0.57574	0.839386	0	0	0	chr7	25235699	25236366	+	1	ciRNA	-	ENSSSCT00000034718	GABBR1	mRNA	chr7:25235698-25236384	gamma-aminobutyric acid type B receptor subunit 1 [Source:HGNC Symbol;Acc:HGNC:4070]	GO:0098793(presynapse);GO:0045211(postsynaptic membrane);GO:0042734(presynaptic membrane);GO:0038039(G-protein coupled receptor heterodimeric complex);GO:0038037(G-protein coupled receptor dimeric complex);GO:0016021(integral component of membrane);GO:0016020(membrane);GO:0005887(integral component of plasma membrane);GO:0005737(cytoplasm);GO:0007214(gamma-aminobutyric acid signaling pathway);GO:…	04024(cAMP signaling pathway);04080(Neuroactive ligand-receptor interaction);04915(Estrogen signaling pathway);04727(GABAergic synapse);05032(Morphine addiction)
ciRNA178	0	0	2	8	6	10	22	17	14	0	0	0	0	0	0.231756	0.966881	0.774479	1.33369	2.92757	1.57015	1.74018	0	0	0	chr7	34501973	34502319	+	1	ciRNA	-	ENSSSCT00000001691	ITPR3	mRNA	chr7:34501972-34502345	inositol 1,4,5-trisphosphate receptor type 3 [Source:HGNC Symbol;Acc:HGNC:6182]	GO:0043235(receptor complex);GO:0016021(integral component of membrane);GO:0016020(membrane);GO:0005887(integral component of plasma membrane);GO:0005886(plasma membrane);GO:0005789(endoplasmic reticulum membrane);GO:0005783(endoplasmic reticulum);GO:0005737(cytoplasm);GO:0005730(nucleolus);GO:0005654(nucleoplasm);GO:0005634(nucleus);GO:0070588(calcium ion transmembrane transport);GO:0060402(calc…	04020(Calcium signaling pathway);04070(Phosphatidylinositol signaling system);04022(cGMP - PKG signaling pathway);04114(Oocyte meiosis);04540(Gap junction);04611(Platelet activation);04911(Insulin secretion);04922(Glucagon signaling pathway);04912(GnRH signaling pathway);04915(Estrogen signaling pathway);04921(Oxytocin signaling pathway);04918(Thyroid hormone synthesis);04270(Vascular smooth musc…
ciRNA179	8	6	27	42	29	51	25	22	33	145	39	35	1.2008	0.867832	3.86357	6.26838	4.62253	8.39938	4.10816	2.50921	5.06527	14.2729	3.7075	3.66565	chr7	43762209	43762489	+	1	ciRNA	-	ENSSSCT00000030706	CUL9	mRNA	chr7:43762208-43762515	cullin 9 [Source:HGNC Symbol;Acc:HGNC:15982]	GO:0031461(cullin-RING ubiquitin ligase complex);GO:0005829(cytosol);GO:0016567(protein ubiquitination);GO:0007088(regulation of mitotic nuclear division);GO:0006511(ubiquitin-dependent protein catabolic process);GO:0000226(microtubule cytoskeleton organization);GO:0046872(metal ion binding);GO:0031625(ubiquitin protein ligase binding);GO:0008270(zinc ion binding)	NA
ciRNA18	11	5	5.5	2	0.5	0	0	4.5	3.5	0	0	2.5	0.985049	0.431459	0.469541	0.178083	0.0475485	0	0	0.306206	0.32051	0	0	0.15621	chr13	100731326	100731796	+	1	ciRNA	-	ENSSSCT00000012830	MBNL1	mRNA	chr13:100731325-100732013	muscleblind like splicing regulator 1 [Source:HGNC Symbol;Acc:HGNC:6923]	GO:0010494(cytoplasmic stress granule);GO:0005829(cytosol);GO:0005813(centrosome);GO:0005737(cytoplasm);GO:0005654(nucleoplasm);GO:0005634(nucleus);GO:0043484(regulation of RNA splicing);GO:0008380(RNA splicing);GO:0046872(metal ion binding);GO:0003725(double-stranded RNA binding);GO:0003723(RNA binding)	NA
ciRNA180	0	0	1	0	0	0	16	1	23	57	0	17	0	0	0.0286803	0	0	0	0.526969	0.0228599	0.707579	1.12454	0	0.356854	chr7	52538634	52540035	-	1	ciRNA	-	ENSSSCT00000031013	MCM3	mRNA	chr7:52538602-52540035	minichromosome maintenance complex component 3 [Source:HGNC Symbol;Acc:HGNC:6945]	GO:0048471(perinuclear region of cytoplasm);GO:0042555(MCM complex);GO:0016020(membrane);GO:0005813(centrosome);GO:0005737(cytoplasm);GO:0005654(nucleoplasm);GO:0005634(nucleus);GO:0000784(nuclear chromosome, telomeric region);GO:0032508(DNA duplex unwinding);GO:0006270(DNA replication initiation);GO:0006260(DNA replication);GO:0016787(hydrolase activity);GO:0005524(ATP binding);GO:0004386(helica…	03030(DNA replication);04110(Cell cycle)
ciRNA181	0	0	1	0	2	0	16	0	13	0	0	0	0	0	0.164121	0	0.365638	0	3.01556	0	2.28861	0	0	0	chr7	58511854	58512098	+	1	ciRNA	-	ENSSSCT00000002037	FES	mRNA	chr7:58511853-58512180	FES proto-oncogene, tyrosine kinase [Source:HGNC Symbol;Acc:HGNC:3657]	GO:0031410(cytoplasmic vesicle);GO:0031234(extrinsic component of cytoplasmic side of plasma membrane);GO:0015630(microtubule cytoskeleton);GO:0005925(focal adhesion);GO:0005856(cytoskeleton);GO:0005737(cytoplasm);GO:2000251(positive regulation of actin cytoskeleton reorganization);GO:2000145(regulation of cell motility);GO:0051297(centrosome organization);GO:0046777(protein autophosphorylation);…	04360(Axon guidance)
ciRNA182	868.5	821	521.5	975.5	703	482.5	366.5	452	435	1196	1187	897	53.3211	48.571	30.5231	59.5502	45.8339	32.5031	24.6338	21.0864	27.3104	48.153	46.1548	38.426	chr7	65565442	65566128	+	1	ciRNA	-	ENSSSCT00000002159	PKM	mRNA	chr7:65565441-65566155	pyruvate kinase, muscle [Source:HGNC Symbol;Acc:HGNC:9021]	GO:1903561(extracellular vesicle);GO:0070062(extracellular exosome);GO:0043209(myelin sheath);GO:0031982(vesicle);GO:0031012(extracellular matrix);GO:0005929(cilium);GO:0005829(cytosol);GO:0005739(mitochondrion);GO:0005737(cytoplasm);GO:0005634(nucleus);GO:0032869(cellular response to insulin stimulus);GO:0016310(phosphorylation);GO:0012501(programmed cell death);GO:0006096(glycolytic process);GO…	01200(Carbon metabolism);01230(Biosynthesis of amino acids);00010(Glycolysis / Gluconeogenesis);00620(Pyruvate metabolism);00230(Purine metabolism);04922(Glucagon signaling pathway);05230(Central carbon metabolism in cancer);05203(Viral carcinogenesis);04930(Type II diabetes mellitus)
ciRNA183	868.5	821	521.5	975.5	703	482.5	366.5	452	435	1196	1187	897	53.0893	48.3598	30.3904	59.2912	45.6346	32.3617	24.5267	20.9948	27.1916	47.9437	45.9541	38.2589	chr7	65565442	65566131	+	1	ciRNA	-	ENSSSCT00000002159	PKM	mRNA	chr7:65565441-65566155	pyruvate kinase, muscle [Source:HGNC Symbol;Acc:HGNC:9021]	GO:1903561(extracellular vesicle);GO:0070062(extracellular exosome);GO:0043209(myelin sheath);GO:0031982(vesicle);GO:0031012(extracellular matrix);GO:0005929(cilium);GO:0005829(cytosol);GO:0005739(mitochondrion);GO:0005737(cytoplasm);GO:0005634(nucleus);GO:0032869(cellular response to insulin stimulus);GO:0016310(phosphorylation);GO:0012501(programmed cell death);GO:0006096(glycolytic process);GO…	01200(Carbon metabolism);01230(Biosynthesis of amino acids);00010(Glycolysis / Gluconeogenesis);00620(Pyruvate metabolism);00230(Purine metabolism);04922(Glucagon signaling pathway);05230(Central carbon metabolism in cancer);05203(Viral carcinogenesis);04930(Type II diabetes mellitus)
ciRNA184	345	311	281	209	274	283	450	756	606.45	995	535	510	31.2934	27.1831	24.2988	18.8498	26.3928	28.1655	44.6862	52.1063	56.2519	59.1861	30.7343	32.278	chr6	4217613	4218077	-	1	ciRNA	-	ENSSSCT00000002958	ZDHHC7	mRNA	chr6:4217588-4218077	zinc finger DHHC-type containing 7 [Source:HGNC Symbol;Acc:HGNC:18459]	GO:0016021(integral component of membrane);GO:0016020(membrane);GO:0005794(Golgi apparatus);GO:0018345(protein palmitoylation);GO:0018230(peptidyl-L-cysteine S-palmitoylation);GO:0019706(protein-cysteine S-palmitoyltransferase activity);GO:0016746(transferase activity, transferring acyl groups);GO:0016740(transferase activity);GO:0016409(palmitoyltransferase activity);GO:0008270(zinc ion binding)	NA
ciRNA185	0	9	10	6	0	0	0	0	1	0	0	0	0	1.99886	2.19725	1.37503	0	0	0	0	0.235691	0	0	0	chr6	18440544	18440726	+	1	ciRNA	-	ENSSSCT00000003099	CNOT1	mRNA	chr6:18440543-18440767	CCR4-NOT transcription complex subunit 1 [Source:HGNC Symbol;Acc:HGNC:7877]	GO:0030015(CCR4-NOT core complex);GO:0030014(CCR4-NOT complex);GO:0016020(membrane);GO:0005829(cytosol);GO:0005615(extracellular space);GO:0000932(P-body);GO:2000036(regulation of stem cell population maintenance);GO:1900153(positive regulation of nuclear-transcribed mRNA catabolic process, deadenylation-dependent decay);GO:0090503(RNA phosphodiester bond hydrolysis, exonucleolytic);GO:0061014(po…	03018(RNA degradation)
ciRNA186	26	1	9	9	12	6	4	8	17	38	67	51	3.93057	0.145676	1.29709	1.35285	1.92648	0.995246	0.662017	0.918983	2.62809	3.76729	6.41495	5.37967	chr6	26420926	26421204	+	1	ciRNA	-	ENSSSCT00000029059	MT2A	mRNA	chr6:26420925-26421204	metallothionein 2A [Source:HGNC Symbol;Acc:HGNC:7406]	GO:0048471(perinuclear region of cytoplasm);GO:0005737(cytoplasm);GO:0005634(nucleus);GO:0071294(cellular response to zinc ion);GO:0045926(negative regulation of growth);GO:0036018(cellular response to erythropoietin);GO:0036016(cellular response to interleukin-3);GO:0035690(cellular response to drug);GO:0046872(metal ion binding);GO:0008270(zinc ion binding);GO:0008144(drug binding)	04978(Mineral absorption)
ciRNA187	11	7	0	2	4	0	18	38	27	5	47	26	1.61658	0.991304	0	0.292254	0.624261	0	2.89604	4.24349	4.05767	0.481878	4.37461	2.66613	chr6	47217616	47217902	+	1	ciRNA	-	ENSSSCT00000003429	NECTIN2	mRNA	chr6:47217615-47227821	nectin cell adhesion molecule 2 [Source:HGNC Symbol;Acc:HGNC:9707]	GO:0016021(integral component of membrane);GO:0016020(membrane);GO:0005911(cell-cell junction);GO:0046718(viral entry into host cell);GO:0007286(spermatid development);GO:0007155(cell adhesion);GO:0050839(cell adhesion molecule binding);GO:0046982(protein heterodimerization activity);GO:0042803(protein homodimerization activity);GO:0070062(extracellular exosome);GO:0044291(cell-cell contact zone)…	04514(Cell adhesion molecules (CAMs));04520(Adherens junction);05168(Herpes simplex infection)
ciRNA188	0	0	0	0	7	1	6	0	5	0	0	0	0	0	0	0	1.24419	0.183647	1.09942	0	0.855784	0	0	0	chr6	52416041	52416292	-	1	ciRNA	-	ENSSSCT00000003610	ENSSSCG00000003250	mRNA	chr6:52416019-52416292	NA	GO:0016021(integral component of membrane);GO:0016020(membrane);GO:0006865(amino acid transport);GO:0003333(amino acid transmembrane transport);GO:0015171(amino acid transmembrane transporter activity)	NA
ciRNA189	4.5	10	3.5	4	5.5	0	1.5	4.5	2.5	0	25.5	2.5	0.392963	0.84148	0.291375	0.347316	0.510039	0	0.143403	0.298598	0.223248	0	1.41031	0.152329	chr5	23614832	23615314	-	1	ciRNA	-	ENSSSCT00000032195	BAZ2A	mRNA	chr5:23614688-23615314	bromodomain adjacent to zinc finger domain 2A [Source:HGNC Symbol;Acc:HGNC:962]	GO:0016607(nuclear speck);GO:0005829(cytosol);GO:0005634(nucleus);GO:0046872(metal ion binding);GO:0042393(histone binding);GO:0008270(zinc ion binding);GO:0003677(DNA binding);GO:0001164(RNA polymerase I CORE element sequence-specific DNA binding)	NA
ciRNA19	343.167	311	283.5	236.5	202.5	222.5	137.5	185.5	128	145	191	96	41.5922	36.3222	32.7571	28.5013	26.0636	29.5893	18.2447	17.0839	15.8645	11.5249	14.6615	8.1186	chr12	1163312	1163659	+	1	ciRNA	-	ENSSSCT00000025260	ACTG1	mRNA	chr12:1163311-1163686	actin gamma 1 [Source:HGNC Symbol;Acc:HGNC:144]	GO:0097433(dense body);GO:0072562(blood microparticle);GO:0070062(extracellular exosome);GO:0043209(myelin sheath);GO:0031941(filamentous actin);GO:0031012(extracellular matrix);GO:0030016(myofibril);GO:0016020(membrane);GO:0015629(actin cytoskeleton);GO:0005925(focal adhesion);GO:0005886(plasma membrane);GO:0005856(cytoskeleton);GO:0005634(nucleus);GO:0005615(extracellular space);GO:0070527(plat…	04015(Rap1 signaling pathway);04390(Hippo signaling pathway);04145(Phagosome);04810(Regulation of actin cytoskeleton);04510(Focal adhesion);04520(Adherens junction);04530(Tight junction);04611(Platelet activation);04670(Leukocyte transendothelial migration);04921(Oxytocin signaling pathway);04919(Thyroid hormone signaling pathway);05205(Proteoglycans in cancer);05410(Hypertrophic cardiomyopathy (…
ciRNA190	0	20	21	9	1	0	8	20	4	0	0	0	0	3.67814	3.82084	1.7079	0.202673	0	1.67152	2.90041	0.780661	0	0	0	chr5	23664661	23664881	-	1	ciRNA	-	ENSSSCT00000033906	ATP5B	mRNA	chr5:23664610-23664881	ATP synthase, H+ transporting, mitochondrial F1 complex, beta polypeptide [Source:HGNC Symbol;Acc:HGNC:830]	GO:0045261(proton-transporting ATP synthase complex, catalytic core F(1));GO:0099132(ATP hydrolysis coupled cation transmembrane transport);GO:0046034(ATP metabolic process);GO:0015992(proton transport);GO:0015986(ATP synthesis coupled proton transport);GO:0006754(ATP biosynthetic process);GO:0046933(proton-transporting ATP synthase activity, rotational mechanism);GO:0005524(ATP binding);GO:00001…	00190(Oxidative phosphorylation);05010(Alzheimer's disease);05012(Parkinson's disease);05016(Huntington's disease)
ciRNA191	0	4	0	43	31	39	83	148	77	0	0	0	0	0.426703	0	4.73321	3.64439	4.73722	10.0593	12.4497	8.71687	0	0	0	chr4	103701956	103702336	+	1	ciRNA	-	ENSSSCT00000007166	KCNN3	mRNA	chr4:103701955-103752545	potassium calcium-activated channel subfamily N member 3 [Source:HGNC Symbol;Acc:HGNC:6292]	GO:0016021(integral component of membrane);GO:0016020(membrane);GO:0005886(plasma membrane);GO:0005737(cytoplasm);GO:0071805(potassium ion transmembrane transport);GO:0006813(potassium ion transport);GO:0016286(small conductance calcium-activated potassium channel activity);GO:0015269(calcium-activated potassium channel activity);GO:0005516(calmodulin binding)	NA
ciRNA192	0	8	1	6	9	39	117	167	105	133	72	104	0	1.10972	0.137235	0.858808	1.37582	6.16	18.4388	18.2671	15.4567	12.5555	6.56429	10.4461	chr4	116705836	116706128	-	1	ciRNA	-	ENSSSCT00000007404	OLFML3	mRNA	chr4:116705804-116706128	olfactomedin like 3 [Source:HGNC Symbol;Acc:HGNC:24956]	GO:1903561(extracellular vesicle);GO:0055114(oxidation-reduction process);GO:0006086(acetyl-CoA biosynthetic process from pyruvate);GO:0019164(pyruvate synthase activity);GO:0016491(oxidoreductase activity)	NA
ciRNA193	0	0	0	7	1	11	5	13	6	0	0	11	0	0	0	0.906078	0.138243	1.5712	0.712588	1.28594	0.798732	0	0	0.999164	chr4	121299446	121299769	-	1	ciRNA	-	ENSSSCT00000007483	PSRC1	mRNA	chr4:121299416-121299769	proline and serine rich coiled-coil 1 [Source:HGNC Symbol;Acc:HGNC:24472]	GO:0030496(midbody);GO:0015630(microtubule cytoskeleton);GO:0005876(spindle microtubule);GO:0005829(cytosol);GO:0005819(spindle);GO:0005737(cytoplasm);GO:0005654(nucleoplasm);GO:0000922(spindle pole);GO:0060236(regulation of mitotic spindle organization);GO:0045893(positive regulation of transcription, DNA-templated);GO:0045737(positive regulation of cyclin-dependent protein serine/threonine kina…	NA
ciRNA194	16	27	12	18	7	12	3	77	30	0	82	37	3.35745	5.45957	2.40058	3.75568	1.55988	2.76292	0.689189	12.2777	6.43754	0	10.8978	5.41745	chr3	38522514	38522714	-	1	ciRNA	-	ENSSSCT00000008685	ENSSSCG00000007924	mRNA	chr3:38522458-38522714	NA	GO:0005634(nucleus);GO:0006325(chromatin organization)	NA
ciRNA195	4	0	33	32	37	22	26	61	28	0	0	0	0.617993	0	4.86052	4.91586	6.07053	3.72944	4.39768	7.16125	4.42375	0	0	0	chr3	40567011	40567283	+	1	ciRNA	-	ENSSSCT00000032217	MMP25	mRNA	chr3:40567010-40567317	matrix metallopeptidase 25 [Source:HGNC Symbol;Acc:HGNC:14246]	GO:0031012(extracellular matrix);GO:0016021(integral component of membrane);GO:0005886(plasma membrane);GO:0060022(hard palate development);GO:0006954(inflammatory response);GO:0006508(proteolysis);GO:0046872(metal ion binding);GO:0016787(hydrolase activity);GO:0008270(zinc ion binding);GO:0008237(metallopeptidase activity);GO:0008233(peptidase activity);GO:0005509(calcium ion binding);GO:0004222…	NA
ciRNA196	0	17	0	4	9	6	3	24	20	0	0	6	0	2.61719	0	0.635431	1.52696	1.05179	0.524724	2.91359	3.26754	0	0	0.668862	chr3	42313196	42313459	-	1	ciRNA	-	ENSSSCT00000008812	PKD1	mRNA	chr3:42313165-42313459	polycystin 1, transient receptor potential channel interacting [Source:HGNC Symbol;Acc:HGNC:9008]	GO:0070062(extracellular exosome);GO:0031514(motile cilium);GO:0016323(basolateral plasma membrane);GO:0016021(integral component of membrane);GO:0016020(membrane);GO:0009986(cell surface);GO:0005929(cilium);GO:0005886(plasma membrane);GO:0005737(cytoplasm);GO:0005634(nucleus);GO:0002133(polycystin complex);GO:0072287(metanephric distal tubule morphogenesis);GO:0072237(metanephric proximal tubule…	NA
ciRNA197	5	3	7	17	16	5	19	21	26	0	18	13	0.954254	0.551721	1.27361	3.22603	3.24277	1.04704	3.96986	3.04543	5.0743	0	2.17572	1.73117	chr3	42688102	42688322	+	1	ciRNA	-	ENSSSCT00000031486	ENSSSCG00000027098	mRNA	chr3:42688101-42688346	NA	NA	NA
ciRNA198	18	13	16	4	3	15	0	14	7	0	3	0	2.67325	1.86044	2.26534	0.590682	0.473141	2.44431	0	1.57991	1.0631	0	0.28218	0	chr3	90740443	90740726	+	1	ciRNA	-	ENSSSCT00000009201	MTIF2	mRNA	chr3:90740442-90740752	mitochondrial translational initiation factor 2 [Source:HGNC Symbol;Acc:HGNC:7441]	GO:0005739(mitochondrion);GO:0005654(nucleoplasm);GO:0005622(intracellular);GO:0006413(translational initiation);GO:0005525(GTP binding);GO:0003924(GTPase activity);GO:0003743(translation initiation factor activity);GO:0003723(RNA binding)	NA
ciRNA199	5	23	9	1	14	0	1	19	13	59	8	27	0.814247	3.60927	1.39725	0.161925	2.42112	0	0.178285	2.35112	2.1649	6.30088	0.825113	3.06799	chr2	3995677	3995935	-	1	ciRNA	-	ENSSSCT00000014121	ADRBK1	mRNA	chr2:3995655-3995935	adrenergic, beta, receptor kinase 1 [Source:RefSeq peptide;Acc:NP_001231807]	GO:0016020(membrane);GO:0005737(cytoplasm);GO:0060048(cardiac muscle contraction);GO:0046718(viral entry into host cell);GO:0045988(negative regulation of striated muscle contraction);GO:0031623(receptor internalization);GO:0019079(viral genome replication);GO:0018107(peptidyl-threonine phosphorylation);GO:0018105(peptidyl-serine phosphorylation);GO:0016310(phosphorylation);GO:0007507(heart devel…	04144(Endocytosis);04062(Chemokine signaling pathway);04724(Glutamatergic synapse);05032(Morphine addiction)
ciRNA2	19	0	13	14	16	29	43	25	18	0	13	38	2.25107	0	1.46833	1.64927	2.01307	3.76992	5.5774	2.25067	2.18081	0	0.975475	3.1414	chr6	421936	422291	+	1	ciRNA	-	ENSSSCT00000031647	FANCA	mRNA	chr6:421935-422316	Fanconi anemia complementation group A [Source:HGNC Symbol;Acc:HGNC:3582]	GO:0043240(Fanconi anaemia nuclear complex);GO:0005634(nucleus);GO:2000348(regulation of CD40 signaling pathway);GO:0051090(regulation of sequence-specific DNA binding transcription factor activity);GO:0050727(regulation of inflammatory response);GO:0045589(regulation of regulatory T cell differentiation);GO:0042127(regulation of cell proliferation);GO:0008585(female gonad development);GO:0008584…	03460(Fanconi anemia pathway)
ciRNA20	77	142	106	113	114.333	115	143	193	175	413	366.167	373.5	9.99294	17.7581	13.1146	14.5817	15.7571	16.3756	20.3173	19.0325	23.2247	35.1492	30.0967	33.8218	chr12	52869446	52869770	+	1	ciRNA	-	ENSSSCT00000019469	PITPNM3	mRNA	chr12:52869445-52869792	PITPNM family member 3 [Source:HGNC Symbol;Acc:HGNC:21043]	GO:0005622(intracellular);GO:0006810(transport);GO:0046872(metal ion binding)	NA
ciRNA200	4	25	14	35	17	14	110	42	33	23	25	0	0.811116	4.88503	2.70643	7.05695	3.66078	3.11493	24.4198	6.47154	6.84298	3.05854	3.2107	0	chr2	8318543	8318750	+	1	ciRNA	-	ENSSSCT00000029108	NXF1	mRNA	chr2:8318542-8318766	nuclear RNA export factor 1 [Source:HGNC Symbol;Acc:HGNC:8071]	GO:0042405(nuclear inclusion body);GO:0016607(nuclear speck);GO:0005737(cytoplasm);GO:0005654(nucleoplasm);GO:0005643(nuclear pore);GO:0005634(nucleus);GO:0005622(intracellular);GO:0000346(transcription export complex);GO:0051028(mRNA transport);GO:0016973(poly(A)+ mRNA export from nucleus);GO:0006810(transport);GO:0006406(mRNA export from nucleus);GO:0006405(RNA export from nucleus);GO:0005487(n…	03013(RNA transport);03015(mRNA surveillance pathway);03008(Ribosome biogenesis in eukaryotes);05164(Influenza A);05168(Herpes simplex infection)
ciRNA201	19.0833	15	31.3333	35.6667	24.3333	23.6667	19.3333	49.3333	36.6667	163.667	159	127.167	3.88839	2.94518	6.0865	7.22611	5.26525	5.29115	4.31271	7.63821	7.64005	21.8695	20.5187	18.0797	chr2	9251567	9251773	-	1	ciRNA	-	ENSSSCT00000014288	FADS1	mRNA	chr2:9251549-9251773	fatty acid desaturase 1 [Source:RefSeq peptide;Acc:NP_001106512]	GO:0016021(integral component of membrane);GO:0016020(membrane);GO:0055114(oxidation-reduction process);GO:0006629(lipid metabolic process);GO:0016491(oxidoreductase activity)	01212(Fatty acid metabolism);01040(Biosynthesis of unsaturated fatty acids)
ciRNA202	0	6	1	3	3.5	2.5	0	0	5	8	5	0	0	1.36235	0.224635	0.702879	0.875796	0.646354	0	0	1.20479	1.23619	0.746174	0	chr2	16211095	16211273	-	1	ciRNA	-	ENSSSCT00000014449	NDUFS3	mRNA	chr2:16211067-16211273	NADH:ubiquinone oxidoreductase core subunit S3 [Source:HGNC Symbol;Acc:HGNC:7710]	GO:0043209(myelin sheath);GO:0031966(mitochondrial membrane);GO:0016604(nuclear body);GO:0005747(mitochondrial respiratory chain complex I);GO:0005743(mitochondrial inner membrane);GO:0005739(mitochondrion);GO:2001243(negative regulation of intrinsic apoptotic signaling pathway);GO:0072593(reactive oxygen species metabolic process);GO:0055114(oxidation-reduction process);GO:0045333(cellular respi…	00190(Oxidative phosphorylation);05010(Alzheimer's disease);05012(Parkinson's disease);05016(Huntington's disease);04932(Non-alcoholic fatty liver disease (NAFLD))
ciRNA203	13.5	18	6.5	16	17.5	8	34	56.5	42.5	5	0.5	0	1.68462	2.16445	0.773264	1.98525	2.31905	1.09536	4.64489	5.35739	5.42334	0.409169	0.0395163	0	chr2	69312928	69313265	-	1	ciRNA	-	ENSSSCT00000014923	DNMT1	mRNA	chr2:69312895-69313265	DNA methyltransferase 1 [Source:HGNC Symbol;Acc:HGNC:2976]	GO:0005721(pericentric heterochromatin);GO:0005657(replication fork);GO:0005634(nucleus);GO:0000792(heterochromatin);GO:0090309(positive regulation of methylation-dependent chromatin silencing);GO:0090116(C-5 methylation of cytosine);GO:0071230(cellular response to amino acid stimulus);GO:0051573(negative regulation of histone H3-K9 methylation);GO:0051571(positive regulation of histone H3-K4 met…	00270(Cysteine and methionine metabolism);05206(MicroRNAs in cancer)
ciRNA204	8.08333	3.66667	0	6.16667	2.33333	9.33333	7.53333	7.25	24.4	0	8.66667	0.333333	1.209	0.528461	0	0.917094	0.370609	1.53169	1.23354	0.823968	3.73195	0	0.820968	0.0347872	chr1	9361462	9361743	-	1	ciRNA	-	ENSSSCT00000004474	PNLDC1	mRNA	chr1:9361435-9361743	PARN like, ribonuclease domain containing 1 [Source:HGNC Symbol;Acc:HGNC:21185]	GO:0005783(endoplasmic reticulum);GO:0090503(RNA phosphodiester bond hydrolysis, exonucleolytic);GO:0000289(nuclear-transcribed mRNA poly(A) tail shortening);GO:0004535(poly(A)-specific ribonuclease activity);GO:0003676(nucleic acid binding)	NA
ciRNA205	1	3	5	1	0	0	0	0	1	0	5	0	0.216297	0.625284	1.03102	0.215069	0	0	0	0	0.221187	0	0.684949	0	chr1	144960879	144961073	-	1	ciRNA	-	ENSSSCT00000005246	RTF1	mRNA	chr1:144960856-144961073	RTF1 homolog, Paf1/RNA polymerase II complex component [Source:HGNC Symbol;Acc:HGNC:28996]	GO:0016593(Cdc73/Paf1 complex);GO:0005730(nucleolus);GO:0080182(histone H3-K4 trimethylation);GO:0051571(positive regulation of histone H3-K4 methylation);GO:0045944(positive regulation of transcription from RNA polymerase II promoter);GO:0032968(positive regulation of transcription elongation from RNA polymerase II promoter);GO:0019827(stem cell population maintenance);GO:0016570(histone modific…	NA
ciRNA206	7	0	20	10	23	33	8	0	11	0	0	0	1.12261	0	3.05778	1.59462	3.91706	5.80687	1.40458	0	1.80398	0	0	0	chr1	301899598	301899860	+	1	ciRNA	-	ENSSSCT00000006172	ENSSSCG00000005613	mRNA	chr1:301899597-301899883	NA	GO:0005886(plasma membrane);GO:0005737(cytoplasm);GO:2000786(positive regulation of autophagosome assembly);GO:1904417(positive regulation of xenophagy);GO:0070086(ubiquitin-dependent endocytosis);GO:0016567(protein ubiquitination);GO:0007165(signal transduction);GO:0061630(ubiquitin protein ligase activity);GO:0008270(zinc ion binding)	NA
ciRNA207	165	100	119	122	88	105	1927	5160	1974.5	1964	1501	1096	11.9577	6.98341	8.22158	8.79122	6.77248	8.3493	152.888	284.15	146.329	93.34	68.8939	55.4213	chr18	3018983	3019564	-	1	ciRNA	-	ENSSSCT00000017880	INSIG1	mRNA	chr18:3018945-3019564	insulin induced gene 1 [Source:HGNC Symbol;Acc:HGNC:6083]	GO:0032937(SREBP-SCAP-Insig complex);GO:0016021(integral component of membrane);GO:0016020(membrane);GO:0005783(endoplasmic reticulum);GO:1901303(negative regulation of cargo loading into COPII-coated vesicle);GO:0060363(cranial suture morphogenesis);GO:0060021(palate development);GO:0045717(negative regulation of fatty acid biosynthetic process);GO:0045599(negative regulation of fat cell differe…	NA
ciRNA208	11	16	16	11	19	10	18	6	12	0	0	0	2.04387	2.86474	2.83417	2.03226	3.749	2.03872	3.66151	0.847124	2.28008	0	0	0	chr18	55506043	55506269	-	1	ciRNA	-	ENSSSCT00000018225	OGDH	mRNA	chr18:55506022-55506269	oxoglutarate dehydrogenase [Source:HGNC Symbol;Acc:HGNC:8124]	GO:0045252(oxoglutarate dehydrogenase complex);GO:0005739(mitochondrion);GO:0061034(olfactory bulb mitral cell layer development);GO:0055114(oxidation-reduction process);GO:0022028(tangential migration from the subventricular zone to the olfactory bulb);GO:0021860(pyramidal neuron development);GO:0021794(thalamus development);GO:0021766(hippocampus development);GO:0021756(striatum development);GO…	01200(Carbon metabolism);00020(Citrate cycle (TCA cycle));00310(Lysine degradation);00380(Tryptophan metabolism)
ciRNA209	26	4	19	25	5	5	24	34	18	2	15	0	3.56048	0.527837	2.48047	3.4041	0.727122	0.751282	3.59811	3.53793	2.52067	0.179609	1.30096	0	chr9	1503600	1503907	-	1	ciRNA	-	ENSSSCT00000015931	TUB	mRNA	chr9:1502927-1503907	tubby bipartite transcription factor [Source:HGNC Symbol;Acc:HGNC:12406]	GO:0005929(cilium);GO:0005829(cytosol);GO:0005576(extracellular region);GO:1903546(protein localization to photoreceptor outer segment);GO:0097500(receptor localization to non-motile cilium);GO:0060041(retina development in camera-type eye);GO:0050766(positive regulation of phagocytosis);GO:0045494(photoreceptor cell maintenance);GO:0007605(sensory perception of sound);GO:0006910(phagocytosis, re…	NA
ciRNA21	15057.7	22598.7	23077.3	12499.2	13316.8	18370.7	4767.5	6144.08	4769.2	2474.5	1923.58	1394.58	2.5541	3.69374	3.73172	2.10807	2.39873	3.41903	0.885312	0.791901	0.827242	0.275251	0.206646	0.165054	chr16	18898517	19147177	+	1	ciRNA	-	ENSSSCT00000036642	PDZD2	mRNA	chr16:18898516-19286747	NA	NA	NA
ciRNA210	13	11	8	17	15	21	27	70	58	168	39	14	2.07695	1.69348	1.21848	2.70058	2.54493	3.68128	4.72251	8.49798	9.47587	17.6017	3.94624	1.56068	chr9	7366910	7367173	-	1	ciRNA	-	ENSSSCT00000016153	NUMA1	mRNA	chr9:7366907-7367173	nuclear mitotic apparatus protein 1 [Source:HGNC Symbol;Acc:HGNC:8059]	GO:0097431(mitotic spindle pole);GO:0072686(mitotic spindle);GO:0070062(extracellular exosome);GO:0061673(mitotic spindle astral microtubule);GO:0045177(apical part of cell);GO:0016363(nuclear matrix);GO:0005938(cell cortex);GO:0005876(spindle microtubule);GO:0005829(cytosol);GO:0005813(centrosome);GO:0005654(nucleoplasm);GO:0005634(nucleus);GO:0000922(spindle pole);GO:0000139(Golgi membrane);GO:…	NA
ciRNA211	8	9	25	3	14	5	1	2	6	0	0	0	0.523138	0.567118	1.55852	0.195063	0.972201	0.358752	0.0715902	0.0993783	0.401224	0	0	0	chr9	142165573	142166217	-	1	ciRNA	-	ENSSSCT00000016976	SMYD2	mRNA	chr9:142165531-142166217	N-lysine methyltransferase SMYD2 [Source:RefSeq peptide;Acc:NP_001153563]	GO:0005829(cytosol);GO:0005737(cytoplasm);GO:0005634(nucleus);GO:0043516(regulation of DNA damage response, signal transduction by p53 class mediator);GO:0018027(peptidyl-lysine dimethylation);GO:0018026(peptidyl-lysine monomethylation);GO:0016571(histone methylation);GO:0010452(histone H3-K36 methylation);GO:0008285(negative regulation of cell proliferation);GO:0000122(negative regulation of tra…	NA
ciRNA212	262	239	151	187	141	131	46	106	73	38	190	76	9.95553	8.75116	5.46998	7.06531	5.68963	5.46175	1.91359	3.06058	2.83658	0.946913	4.5725	2.01502	chr8	55496635	55497744	+	1	ciRNA	-	ENSSSCT00000009733	TMA16	mRNA	chr8:55496634-55497786	translation machinery associated 16 homolog [Source:HGNC Symbol;Acc:HGNC:25638]	GO:0005730(nucleolus);GO:0005634(nucleus);GO:0005840(ribosome)	NA
ciRNA213	0	0	0	0	0	1	0	3.33333	0.666667	0	0	0	0	0	0	0	0	0.247481	0	0.571293	0.153767	0	0	0	chr13	78380412	78380598	+	1	ciRNA	-	ENSSSCT00000024978	ENSSSCG00000028031	mRNA	chr13:78380411-78380623	NA	GO:0016787(hydrolase activity)	NA
ciRNA214	11	5	9.5	2	0.5	0	0	4.5	3.5	0	0	2.5	0.958591	0.419871	0.789241	0.173299	0.0462714	0	0	0.297981	0.311902	0	0	0.152014	chr13	100731326	100731809	+	1	ciRNA	-	ENSSSCT00000012830	MBNL1	mRNA	chr13:100731325-100732013	muscleblind like splicing regulator 1 [Source:HGNC Symbol;Acc:HGNC:6923]	GO:0010494(cytoplasmic stress granule);GO:0005829(cytosol);GO:0005813(centrosome);GO:0005737(cytoplasm);GO:0005654(nucleoplasm);GO:0005634(nucleus);GO:0043484(regulation of RNA splicing);GO:0008380(RNA splicing);GO:0046872(metal ion binding);GO:0003725(double-stranded RNA binding);GO:0003723(RNA binding)	NA
ciRNA215	1251.17	1360.83	1329.33	754.667	872.667	1136.25	178.333	321.5	240.2	76.1667	99	36.3333	0.429587	0.450241	0.435126	0.257642	0.318189	0.428062	0.0670341	0.0838788	0.0843369	0.01715	0.0215282	0.00870451	chr13	138784782	138907624	-	1	ciRNA	-	ENSSSCT00000023418	FGF12	mRNA	chr13:138752693-138907624	fibroblast growth factor 12 [Source:HGNC Symbol;Acc:HGNC:3668]	GO:0005634(nucleus);GO:1905150(regulation of voltage-gated sodium channel activity);GO:0098908(regulation of neuronal action potential);GO:0050905(neuromuscular process);GO:0010765(positive regulation of sodium ion transport);GO:0008344(adult locomotory behavior);GO:0007268(chemical synaptic transmission);GO:0008083(growth factor activity)	NA
ciRNA216	1	28	1	9	7	27	43	29	65	8	93	0	0.137837	3.71901	0.131404	1.23348	1.02462	4.08344	6.48874	3.03737	9.16193	0.723132	8.11866	0	chr13	217065476	217065781	+	1	ciRNA	-	ENSSSCT00000025356	PFKL	mRNA	chr13:217065475-217065805	phosphofructokinase, liver type [Source:HGNC Symbol;Acc:HGNC:8876]	GO:0070062(extracellular exosome);GO:0016020(membrane);GO:0005945(6-phosphofructokinase complex);GO:0005829(cytosol);GO:0005737(cytoplasm);GO:0061615(glycolytic process through fructose-6-phosphate);GO:0051259(protein oligomerization);GO:0046676(negative regulation of insulin secretion);GO:0030388(fructose 1,6-bisphosphate metabolic process);GO:0016310(phosphorylation);GO:0009749(response to gluc…	01200(Carbon metabolism);01230(Biosynthesis of amino acids);00010(Glycolysis / Gluconeogenesis);00030(Pentose phosphate pathway);00051(Fructose and mannose metabolism);00052(Galactose metabolism);03018(RNA degradation);04152(AMPK signaling pathway);05230(Central carbon metabolism in cancer)
ciRNA217	154	143	220	167	124	187	102	280	127	286	248	161	22.1686	19.8362	30.1916	23.9035	18.9558	29.5364	16.0748	30.6275	18.6952	26.999	22.6103	16.1714	chr12	5253882	5254174	+	1	ciRNA	-	ENSSSCT00000018715	EXOC7	mRNA	chr12:5253881-5254198	exocyst complex component 7 [Source:HGNC Symbol;Acc:HGNC:23214]	GO:0034451(centriolar satellite);GO:0032584(growth cone membrane);GO:0016020(membrane);GO:0005815(microtubule organizing center);GO:0000145(exocyst);GO:2000535(regulation of entry of bacterium into host cell);GO:0006887(exocytosis)	04910(Insulin signaling pathway)
ciRNA218	75	64	86.3333	45	70	76	111	164	110.5	69	43	86	1.21714	1.00084	1.33568	0.726137	1.20637	1.35329	1.97211	2.02236	1.8338	0.734331	0.441962	0.973826	chr12	26599106	26601704	+	1	ciRNA	-	ENSSSCT00000023663	LRRC59	mRNA	chr12:26599105-26601731	leucine-rich repeat-containing protein 59 [Source:RefSeq peptide;Acc:NP_001231880]	NA	NA
ciRNA219	9	17	7	2	6	0	23	52	39	0	97	10	1.13995	2.07489	0.84525	0.251883	0.80704	0	3.18931	5.00473	5.05144	0	7.78127	0.883782	chr12	36049052	36049384	+	1	ciRNA	-	ENSSSCT00000019204	MTMR4	mRNA	chr12:36049051-36049406	myotubularin related protein 4 [Source:HGNC Symbol;Acc:HGNC:7452]	GO:0005615(extracellular space);GO:0035335(peptidyl-tyrosine dephosphorylation);GO:0016311(dephosphorylation);GO:0007179(transforming growth factor beta receptor signaling pathway);GO:0006470(protein dephosphorylation);GO:0046872(metal ion binding);GO:0016791(phosphatase activity);GO:0004725(protein tyrosine phosphatase activity);GO:0004722(protein serine/threonine phosphatase activity)	NA
ciRNA22	38	125	76	81	35	52	108	62	59	0	25	42	1.09778	3.47975	2.09311	2.32672	1.07375	1.64829	3.41574	1.36101	1.74299	0	0.457415	0.846615	chr7	43714579	43716038	+	1	ciRNA	-	ENSSSCT00000001852	SRF	mRNA	chr7:43714578-43716069	serum response factor [Source:HGNC Symbol;Acc:HGNC:11291]	GO:0005737(cytoplasm);GO:0005634(nucleus);GO:0000790(nuclear chromatin);GO:1902895(positive regulation of pri-miRNA transcription from RNA polymerase II promoter);GO:1902894(negative regulation of pri-miRNA transcription from RNA polymerase II promoter);GO:1900222(negative regulation of beta-amyloid clearance);GO:0090398(cellular senescence);GO:0090136(epithelial cell-cell adhesion);GO:0090009(pr…	04010(MAPK signaling pathway);04022(cGMP - PKG signaling pathway);05203(Viral carcinogenesis);05166(HTLV-I infection)
ciRNA220	0	2	0	7	10	10	6	44	26	80	129	81	0	0.486748	0	1.7579	2.68208	2.7712	1.65901	8.44418	6.71509	13.2502	20.6346	14.2744	chr12	46818103	46818269	-	1	ciRNA	-	ENSSSCT00000019329	SPAG5	mRNA	chr12:46818080-46818269	NA	GO:0072686(mitotic spindle);GO:0035371(microtubule plus-end);GO:0005876(spindle microtubule);GO:0005737(cytoplasm);GO:0000776(kinetochore);GO:0051988(regulation of attachment of spindle microtubules to kinetochore);GO:0051301(cell division);GO:0051294(establishment of spindle orientation);GO:0007051(spindle organization);GO:0000070(mitotic sister chromatid segregation)	NA
ciRNA221	26	3.5	16.5	3.5	3.5	7.5	3	17.5	9	13.5	1	30.5	4.6665	0.605328	2.82324	0.624615	0.667096	1.47699	0.589477	2.38667	1.65185	1.58897	0.113672	3.81963	chr12	55516516	55516750	+	1	ciRNA	-	ENSSSCT00000019548	CHD3	mRNA	chr12:55516515-55516789	chromodomain helicase DNA binding protein 3 [Source:HGNC Symbol;Acc:HGNC:1918]	GO:0016581(NuRD complex);GO:0005815(microtubule organizing center);GO:0005813(centrosome);GO:0005737(cytoplasm);GO:0005730(nucleolus);GO:0005634(nucleus);GO:0051297(centrosome organization);GO:0007051(spindle organization);GO:0006355(regulation of transcription, DNA-templated);GO:0006333(chromatin assembly or disassembly);GO:0006325(chromatin organization);GO:0046872(metal ion binding);GO:0016818…	NA
ciRNA222	2	0	0	2	8	0	2	0	5	0	9	4	0.42604	0	0	0.423621	1.80973	0	0.466421	0	1.08918	0	1.21423	0.594544	chr17	46294751	46294948	+	1	ciRNA	-	ENSSSCT00000024027	ENSSSCG00000021553	mRNA	chr17:46294750-46294989	NA	GO:0005681(spliceosomal complex)	03040(Spliceosome)
ciRNA223	14.5	9.5	0	0	0.5	0.5	7.5	12.5	5.5	0	11.5	6	1.63963	1.03516	0	0	0.0600412	0.0620361	0.928466	1.07405	0.635988	0	0.823592	0.473404	chr17	69015562	69015934	-	1	ciRNA	-	ENSSSCT00000031262	ENSSSCG00000024694	mRNA	chr17:69015538-69015934	NA	GO:0005669(transcription factor TFIID complex);GO:0051123(RNA polymerase II transcriptional preinitiation complex assembly);GO:0045944(positive regulation of transcription from RNA polymerase II promoter);GO:0006355(regulation of transcription, DNA-templated);GO:0006352(DNA-templated transcription, initiation);GO:0046982(protein heterodimerization activity);GO:0008134(transcription factor binding…	NA
ciRNA224	0	10	3	0	9	10	6	23	17	0	17	0	0	1.25831	0.373465	0	1.24804	1.43279	0.857753	2.28216	2.27008	0	1.40595	0	chr15	133815273	133815595	+	1	ciRNA	-	ENSSSCT00000017642	ENSSSCG00000016201	mRNA	chr15:133815272-133815626	NA	NA	NA
ciRNA225	3.5	0	11	4.5	4	14	6.5	28.5	8	0	9.5	1	0.502119	0	1.50445	0.641915	0.609397	2.20376	1.02089	3.10684	1.17365	0	0.863176	0.100102	chr14	49663272	49663565	-	1	ciRNA	-	ENSSSCT00000010945	NIPSNAP1	mRNA	chr14:49663247-49663565	nipsnap homolog 1 [Source:HGNC Symbol;Acc:HGNC:7827]	GO:0097060(synaptic membrane);GO:0016020(membrane);GO:0005743(mitochondrial inner membrane);GO:0005739(mitochondrion);GO:0019233(sensory perception of pain);GO:0042165(neurotransmitter binding)	NA
ciRNA226	0	0	0	0	3	2	0	0	2	0	0	0	0	0	0	0	0.503266	0.346659	0	0	0.323083	0	0	0	chr14	98126061	98126327	-	1	ciRNA	-	ENSSSCT00000011378	OGDHL	mRNA	chr14:98126057-98126327	oxoglutarate dehydrogenase-like [Source:HGNC Symbol;Acc:HGNC:25590]	GO:0045252(oxoglutarate dehydrogenase complex);GO:0005739(mitochondrion);GO:0055114(oxidation-reduction process);GO:0008152(metabolic process);GO:0006099(tricarboxylic acid cycle);GO:0030976(thiamine pyrophosphate binding);GO:0016624(oxidoreductase activity, acting on the aldehyde or oxo group of donors, disulfide as acceptor);GO:0004591(oxoglutarate dehydrogenase (succinyl-transferring) activity)	01200(Carbon metabolism);00020(Citrate cycle (TCA cycle));00310(Lysine degradation);00380(Tryptophan metabolism)
ciRNA227	11	9	34	16	23	2	287	375	223	131	129	199	1.8411	1.45155	5.42513	2.66276	4.08804	0.367293	52.589	47.6927	38.168	14.3787	13.6745	23.2403	chr14	152198497	152198748	-	1	ciRNA	-	ENSSSCT00000030128	BNIP3	mRNA	chr14:152198465-152198748	BCL2 interacting protein 3 [Source:HGNC Symbol;Acc:HGNC:1084]	GO:0031966(mitochondrial membrane);GO:0031307(integral component of mitochondrial outer membrane);GO:0016021(integral component of membrane);GO:0016020(membrane);GO:0014069(postsynaptic density);GO:0005783(endoplasmic reticulum);GO:0005741(mitochondrial outer membrane);GO:0005740(mitochondrial envelope);GO:0005739(mitochondrion);GO:0005635(nuclear envelope);GO:2000378(negative regulation of react…	04068(FoxO signaling pathway);05134(Legionellosis)
ciRNA228	30.6667	26.3333	36.6667	31	25.3333	32	16	19.3333	32.6667	72.6667	59.6667	41.3333	4.57053	3.7819	5.20974	4.59396	4.00953	5.23296	2.61064	2.18948	4.97867	7.10228	5.63207	4.29836	chr6	47654993	47655275	+	1	ciRNA	-	ENSSSCT00000003437	PPP5C	mRNA	chr6:47654992-47655293	protein phosphatase 5 catalytic subunit [Source:HGNC Symbol;Acc:HGNC:9322]	GO:0043234(protein complex);GO:0043231(intracellular membrane-bounded organelle);GO:0005829(cytosol);GO:0043278(response to morphine);GO:0043123(positive regulation of I-kappaB kinase/NF-kappaB signaling);GO:0007165(signal transduction);GO:0006470(protein dephosphorylation);GO:0043531(ADP binding);GO:0042802(identical protein binding);GO:0016787(hydrolase activity);GO:0005524(ATP binding);GO:0004…	04010(MAPK signaling pathway)
ciRNA229	0	0	0	0	0	0	11	5	0	12	0	0	0	0	0	0	0	0	1.28917	0.40672	0	0.842431	0	0	chr1	123223788	123224181	+	1	ciRNA	-	ENSSSCT00000005055	RORA	mRNA	chr1:123223787-123224211	RAR related orphan receptor A [Source:HGNC Symbol;Acc:HGNC:10258]	GO:0005634(nucleus);GO:2000188(regulation of cholesterol homeostasis);GO:0072539(T-helper 17 cell differentiation);GO:0071456(cellular response to hypoxia);GO:0071356(cellular response to tumor necrosis factor);GO:0071347(cellular response to interleukin-1);GO:0070328(triglyceride homeostasis);GO:0060850(regulation of transcription involved in cell fate commitment);GO:0050728(negative regulation …	NA
ciRNA23	9	13	3	10	11	18	2	16	8	0	25	0	1.25696	1.74955	0.399435	1.38869	1.63145	2.75835	0.305799	1.69799	1.14256	0	2.21134	0	chr7	58496049	58496350	+	1	ciRNA	-	ENSSSCT00000002036	FURIN	mRNA	chr7:58496048-58496371	furin, paired basic amino acid cleaving enzyme [Source:HGNC Symbol;Acc:HGNC:8568]	GO:0070062(extracellular exosome);GO:0045121(membrane raft);GO:0030140(trans-Golgi network transport vesicle);GO:0016021(integral component of membrane);GO:0016020(membrane);GO:0009986(cell surface);GO:0005802(trans-Golgi network);GO:0005783(endoplasmic reticulum);GO:0052548(regulation of endopeptidase activity);GO:0045714(regulation of low-density lipoprotein particle receptor biosynthetic proce…	05164(Influenza A)
ciRNA230	124	228	166	129	83	130	185	246	177	418	233	191	19.8862	35.2346	25.3795	20.5706	14.1355	22.8755	32.481	29.9779	29.0277	43.9612	23.6659	21.3731	chr12	5019770	5020032	-	1	ciRNA	-	ENSSSCT00000018703	SPHK1	mRNA	chr12:5019741-5020032	sphingosine kinase 1 [Source:HGNC Symbol;Acc:HGNC:11240]	GO:0005886(plasma membrane);GO:0005829(cytosol);GO:0005737(cytoplasm);GO:0051092(positive regulation of NF-kappaB transcription factor activity);GO:0048146(positive regulation of fibroblast proliferation);GO:0046834(lipid phosphorylation);GO:0046512(sphingosine biosynthetic process);GO:0045987(positive regulation of smooth muscle contraction);GO:0045931(positive regulation of mitotic cell cycle);…	00600(Sphingolipid metabolism);04370(VEGF signaling pathway);04020(Calcium signaling pathway);04071(Sphingolipid signaling pathway);04666(Fc gamma R-mediated phagocytosis);05152(Tuberculosis)
ciRNA231	1	11	6.5	8	8.5	18	1	4	3	7.5	22.5	9	0.186628	1.97822	1.15648	1.48455	1.68461	3.68593	0.204317	0.567248	0.572542	0.917914	2.65948	1.17199	chr6	181324	181549	+	1	ciRNA	-	ENSSSCT00000027926	ENSSSCG00000029761	mRNA	chr6:181323-181573	NA	GO:0005739(mitochondrion);GO:0006144(purine nucleobase metabolic process);GO:0033971(hydroxyisourate hydrolase activity);GO:0016787(hydrolase activity)	00230(Purine metabolism)
ciRNA232	0	0	0	0	4	0	0	0	0	0	29	0	0	0	0	0	0.609397	0	0	0	0	0	2.63496	0	chr6	25680144	25680437	+	1	ciRNA	-	ENSSSCT00000003066	CENPT	mRNA	chr6:25680143-25680439	centromere protein T [Source:HGNC Symbol;Acc:HGNC:25787]	GO:0016604(nuclear body);GO:0005634(nucleus);GO:0000788(nuclear nucleosome);GO:0000776(kinetochore);GO:0000775(chromosome, centromeric region);GO:1903394(protein localization to kinetochore involved in kinetochore assembly);GO:0051382(kinetochore assembly);GO:0051276(chromosome organization);GO:0007059(chromosome segregation);GO:0000278(mitotic cell cycle);GO:0046982(protein heterodimerization ac…	NA
ciRNA233	41	56	147	66	48	53	93	148	123	374	393	235	14.2917	18.8102	48.8499	22.8755	17.7682	20.2709	35.4904	39.2011	43.8444	85.494	86.7621	57.1573	chr6	39522018	39522138	-	1	ciRNA	-	ENSSSCT00000003175	GPI	mRNA	chr6:39521996-39522138	glucose-6-phosphate isomerase [Source:RefSeq peptide;Acc:NP_999495]	GO:0070062(extracellular exosome);GO:0060170(ciliary membrane);GO:0043209(myelin sheath);GO:0016020(membrane);GO:0005886(plasma membrane);GO:0005829(cytosol);GO:0005654(nucleoplasm);GO:0005615(extracellular space);GO:0042593(glucose homeostasis);GO:0034101(erythrocyte homeostasis);GO:0006096(glycolytic process);GO:0006094(gluconeogenesis);GO:0001707(mesoderm formation);GO:0001701(in utero embryon…	01200(Carbon metabolism);00010(Glycolysis / Gluconeogenesis);00030(Pentose phosphate pathway);00500(Starch and sucrose metabolism);00520(Amino sugar and nucleotide sugar metabolism)
ciRNA234	11	1	15	5	23	6	21	37	17	97	43	27	1.90929	0.167257	2.48208	0.862931	4.23945	1.14269	3.99049	4.87997	3.01743	11.0412	4.727	3.26999	chr4	104659681	104659923	+	1	ciRNA	-	ENSSSCT00000007196	DENND4B	mRNA	chr4:104659680-104659949	DENN domain containing 4B [Source:HGNC Symbol;Acc:HGNC:29044]	GO:0005794(Golgi apparatus);GO:0005634(nucleus);GO:0043547(positive regulation of GTPase activity);GO:0032483(regulation of Rab protein signal transduction);GO:0017112(Rab guanyl-nucleotide exchange factor activity)	NA
ciRNA235	0	2	0	1	6	5	11	0	1	0	12	0	0	0.412624	0	0.212886	1.36418	1.17459	2.57834	0	0.218942	0	1.62719	0	chr4	107511818	107512014	+	1	ciRNA	-	ENSSSCT00000007280	CERS2	mRNA	chr4:107511817-107512039	ceramide synthase 2 [Source:HGNC Symbol;Acc:HGNC:14076]	GO:0016021(integral component of membrane);GO:0016020(membrane);GO:0005783(endoplasmic reticulum);GO:0005634(nucleus);GO:0046513(ceramide biosynthetic process);GO:0030148(sphingolipid biosynthetic process);GO:0050291(sphingosine N-acyltransferase activity);GO:0003677(DNA binding)	00600(Sphingolipid metabolism);04071(Sphingolipid signaling pathway)
ciRNA236	19.0833	15	31.3333	35.6667	24.3333	23.6667	19.3333	49.3333	35.6667	163.667	159	127.167	3.92633	2.97391	6.14588	7.29661	5.31662	5.34277	4.35478	7.71273	7.50418	22.0829	20.7189	18.2561	chr2	9251569	9251773	-	1	ciRNA	-	ENSSSCT00000014288	FADS1	mRNA	chr2:9251549-9251773	fatty acid desaturase 1 [Source:RefSeq peptide;Acc:NP_001106512]	GO:0016021(integral component of membrane);GO:0016020(membrane);GO:0055114(oxidation-reduction process);GO:0006629(lipid metabolic process);GO:0016491(oxidoreductase activity)	01212(Fatty acid metabolism);01040(Biosynthesis of unsaturated fatty acids)
ciRNA237	209	153	206	179	210.333	179	315	274	368.5	174	194	249	12.4685	8.79555	11.716	10.6181	13.3253	11.717	20.5733	12.4209	22.4809	6.80737	7.33002	10.365	chr2	78363349	78364055	-	1	ciRNA	-	ENSSSCT00000014665	PTBP1	mRNA	chr2:78363022-78364055	polypyrimidine tract binding protein 1 [Source:HGNC Symbol;Acc:HGNC:9583]	GO:0070062(extracellular exosome);GO:0016020(membrane);GO:0005634(nucleus);GO:0075522(IRES-dependent viral translational initiation);GO:0051148(negative regulation of muscle cell differentiation);GO:0048025(negative regulation of mRNA splicing, via spliceosome);GO:0033119(negative regulation of RNA splicing);GO:0006397(mRNA processing);GO:0000381(regulation of alternative mRNA splicing, via splic…	NA
ciRNA238	6	0	12	2	12	0	8	0	1	0	24	0	0.110752	0	0.211167	0.0367076	0.235225	0	0.161665	0	0.0188759	0	0.280574	0	chr1	85019673	85021957	+	1	ciRNA	-	ENSSSCT00000030299	ENSSSCG00000022201	mRNA	chr1:85019672-85021957	polyphosphoinositide phosphatase [Source:RefSeq peptide;Acc:NP_001230179]	GO:0016021(integral component of membrane);GO:0016020(membrane);GO:0042578(phosphoric ester hydrolase activity)	NA
ciRNA239	23	8	4	6	6	1	51	25	22	0	25	4	0.0722495	0.024216	0.0119788	0.0187407	0.0200152	0.00344671	0.17539	0.0596736	0.0706706	0	0.0497375	0.00876739	chr1	275806148	275819574	-	1	ciRNA	-	ENSSSCT00000005966	ENSSSCG00000005423	mRNA	chr1:275806120-275819574	NA	GO:0016021(integral component of membrane);GO:0016020(membrane);GO:0006810(transport);GO:0016887(ATPase activity);GO:0005524(ATP binding);GO:0005215(transporter activity);GO:0000166(nucleotide binding)	02010(ABC transporters);04975(Fat digestion and absorption)
ciRNA24	72	101	53	155	62	92	50	49	36	68	76	127	14.5302	19.6411	10.1967	31.1027	13.2872	20.3716	11.0468	7.514	7.42935	8.99936	9.71383	17.8833	chr7	58562630	58562838	+	1	ciRNA	-	ENSSSCT00000002040	UNC45A	mRNA	chr7:58562629-58562862	unc-45 myosin chaperone A [Source:HGNC Symbol;Acc:HGNC:30594]	GO:0016607(nuclear speck);GO:0005829(cytosol);GO:0005794(Golgi apparatus);GO:0061077(chaperone-mediated protein folding);GO:0051879(Hsp90 protein binding);GO:0045296(cadherin binding)	NA
ciRNA240	0	0	0	0	1	0	9	0	2	0	4	0	0	0	0	0	0.288972	0	2.68117	0	0.556536	0	0.689368	0	chr17	65657415	65657569	-	1	ciRNA	-	ENSSSCT00000035324	PPP4R1L	mRNA	chr17:65656685-65657569	NA	GO:0005575(cellular_component);GO:0008150(biological_process);GO:0003674(molecular_function)	NA
ciRNA241	94	44	91	82	122	129	40	68	33	439	83	170	10.2448	4.62096	9.45501	8.88618	14.1201	15.4263	4.77268	5.63144	3.67788	31.3764	5.72915	12.9279	chr6	39471799	39472185	+	1	ciRNA	-	ENSSSCT00000003173	KIAA0355	mRNA	chr6:39471798-39472206	KIAA0355 [Source:HGNC Symbol;Acc:HGNC:29016]	NA	NA
ciRNA242	35	21.3333	117	32	58	23	536	1094	483	503	502	571	3.89507	2.28776	12.413	3.54098	6.85451	2.80849	65.3039	92.5123	54.9671	36.7095	35.3824	44.339	chr1	299757508	299757886	-	1	ciRNA	-	ENSSSCT00000006159	HSPA5	mRNA	chr1:299757487-299757886	heat shock protein family A (Hsp70) member 5 [Source:HGNC Symbol;Acc:HGNC:5238]	GO:0070062(extracellular exosome);GO:0043209(myelin sheath);GO:0034663(endoplasmic reticulum chaperone complex);GO:0031012(extracellular matrix);GO:0030496(midbody);GO:0030176(integral component of endoplasmic reticulum membrane);GO:0016020(membrane);GO:0009986(cell surface);GO:0008180(COP9 signalosome);GO:0005925(focal adhesion);GO:0005886(plasma membrane);GO:0005793(endoplasmic reticulum-Golgi …	03060(Protein export);04141(Protein processing in endoplasmic reticulum);04918(Thyroid hormone synthesis);05020(Prion diseases)
ciRNA243	17	43	25	49	76	48	49	33	72	26	83	78	4.16876	10.1609	5.84444	11.9476	19.7912	12.9151	13.1547	6.14904	18.0551	4.18113	12.8906	13.3461	chr9	3907855	3908026	-	1	ciRNA	-	ENSSSCT00000015974	ENSSSCG00000014623	mRNA	chr9:3907830-3908026	NA	GO:0042719(mitochondrial intermembrane space protein transporter complex);GO:0005739(mitochondrion);GO:0015031(protein transport);GO:0006810(transport);GO:0046872(metal ion binding)	NA
ciRNA244	252	173	133	202	164	141	338	309	221	482	459.5	360	10.5865	7.00331	5.32659	8.43782	7.31641	6.49934	15.5452	9.86385	9.49409	13.2789	12.2257	10.5526	chr13	27664959	27665962	+	1	ciRNA	-	ENSSSCT00000012342	CTNNB1	mRNA	chr13:27664958-27665963	catenin beta 1 [Source:HGNC Symbol;Acc:HGNC:2514]	GO:1990909(Wnt signalosome);GO:1990907(beta-catenin-TCF complex);GO:0071944(cell periphery);GO:0071664(catenin-TCF7L2 complex);GO:0070369(beta-catenin-TCF7L2 complex);GO:0070062(extracellular exosome);GO:0048471(perinuclear region of cytoplasm);GO:0045202(synapse);GO:0045177(apical part of cell);GO:0044798(nuclear transcription factor complex);GO:0043296(apical junction complex);GO:0043234(protei…	04015(Rap1 signaling pathway);04310(Wnt signaling pathway);04390(Hippo signaling pathway);04510(Focal adhesion);04520(Adherens junction);04530(Tight junction);04550(Signaling pathways regulating pluripotency of stem cells);04670(Leukocyte transendothelial migration);04919(Thyroid hormone signaling pathway);04916(Melanogenesis);05200(Pathways in cancer);05205(Proteoglycans in cancer);05210(Colorec…
ciRNA25	20	33	3	0	20	0	0	0	0	0	0	0	4.76588	7.5776	0.681521	0	5.0611	0	0	0	0	0	0	0	chr3	108957912	108958088	-	1	ciRNA	-	ENSSSCT00000023650	ENSSSCG00000021359	mRNA	chr3:108937431-108958088	NA	GO:0005886(plasma membrane);GO:0005737(cytoplasm);GO:0043547(positive regulation of GTPase activity);GO:0031274(positive regulation of pseudopodium assembly);GO:0030838(positive regulation of actin filament polymerization);GO:0008360(regulation of cell shape);GO:0007266(Rho protein signal transduction);GO:0017049(GTP-Rho binding);GO:0005096(GTPase activator activity)	NA
ciRNA26	32.3333	30	40	8	16	0	32	47	29	110	0	37	3.2704	2.92399	3.85705	0.804575	1.71859	0	3.54346	3.6123	2.99955	7.29635	0	2.61129	chr2	71193866	71194282	-	1	ciRNA	-	ENSSSCT00000014856	HNRNPM	mRNA	chr2:71193838-71194282	heterogeneous nuclear ribonucleoprotein M [Source:HGNC Symbol;Acc:HGNC:5046]	GO:0071013(catalytic step 2 spliceosome);GO:0070062(extracellular exosome);GO:0042382(paraspeckles);GO:0031012(extracellular matrix);GO:0016363(nuclear matrix);GO:0016020(membrane);GO:0005681(spliceosomal complex);GO:0005654(nucleoplasm);GO:0000398(mRNA splicing, via spliceosome);GO:0000380(alternative mRNA splicing, via spliceosome);GO:0019904(protein domain specific binding);GO:0003723(RNA bind…	03040(Spliceosome)
ciRNA27	16	29	12	3	17	22	37	59	30	0	71	21	4.62225	8.07302	3.30491	0.861749	5.21536	6.97354	11.7021	12.9515	8.86264	0	12.9906	4.23307	chr2	78157661	78157806	-	1	ciRNA	-	ENSSSCT00000014679	MBD3	mRNA	chr2:78157635-78157806	methyl-CpG binding domain protein 3 [Source:HGNC Symbol;Acc:HGNC:6918]	GO:0043234(protein complex);GO:0016581(NuRD complex);GO:0005737(cytoplasm);GO:0005634(nucleus);GO:0000792(heterochromatin);GO:0000790(nuclear chromatin);GO:0000785(chromatin);GO:0043044(ATP-dependent chromatin remodeling);GO:0016573(histone acetylation);GO:0009888(tissue development);GO:0006346(methylation-dependent chromatin silencing);GO:0001701(in utero embryonic development);GO:0000122(negati…	NA
ciRNA28	459	880	284	262	246	230	36	58	23.5	84	52	72	20.7056	38.2527	12.2134	11.7517	11.7845	11.3841	1.77789	1.9881	1.08405	2.48495	1.48564	2.26626	chr1	146908137	146909071	-	1	ciRNA	-	ENSSSCT00000005288	THBS1	mRNA	chr1:146908112-146909071	thrombospondin 1 [Source:HGNC Symbol;Acc:HGNC:11785]	GO:0070062(extracellular exosome);GO:0031091(platelet alpha granule);GO:0031012(extracellular matrix);GO:0030141(secretory granule);GO:0009986(cell surface);GO:0009897(external side of plasma membrane);GO:0005615(extracellular space);GO:0005577(fibrinogen complex);GO:0005576(extracellular region);GO:2001027(negative regulation of endothelial cell chemotaxis);GO:2000379(positive regulation of reac…	04015(Rap1 signaling pathway);04350(TGF-beta signaling pathway);04151(PI3K-Akt signaling pathway);04512(ECM-receptor interaction);04145(Phagosome);04115(p53 signaling pathway);04510(Focal adhesion);05206(MicroRNAs in cancer);05205(Proteoglycans in cancer);05219(Bladder cancer);05144(Malaria)
ciRNA29	9.33333	7.33333	2	1.66667	1.33333	0	9	6.66667	5.66667	36.6667	12.3333	3	0.429293	0.32503	0.0876985	0.076224	0.0651264	0	0.453197	0.233003	0.266534	1.10599	0.359281	0.0962811	chr9	72071037	72071953	-	1	ciRNA	-	ENSSSCT00000016657	DSTYK	mRNA	chr9:72071009-72071953	dual serine/threonine and tyrosine protein kinase [Source:HGNC Symbol;Acc:HGNC:29043]	GO:0016324(apical plasma membrane);GO:0016323(basolateral plasma membrane);GO:0005829(cytosol);GO:0005737(cytoplasm);GO:0070374(positive regulation of ERK1 and ERK2 cascade);GO:0045743(positive regulation of fibroblast growth factor receptor signaling pathway);GO:0044344(cellular response to fibroblast growth factor stimulus);GO:0035556(intracellular signal transduction);GO:0033674(positive regul…	NA
ciRNA3	30.6667	26.3333	36.6667	31	25.3333	32	16	19.3333	32.6667	72.6667	59.6667	41.3333	4.63605	3.83612	5.28444	4.65983	4.06702	5.30798	2.64807	2.22087	5.05005	7.20411	5.71282	4.35999	chr6	47654993	47655271	+	1	ciRNA	-	ENSSSCT00000003437	PPP5C	mRNA	chr6:47654992-47655293	protein phosphatase 5 catalytic subunit [Source:HGNC Symbol;Acc:HGNC:9322]	GO:0043234(protein complex);GO:0043231(intracellular membrane-bounded organelle);GO:0005829(cytosol);GO:0043278(response to morphine);GO:0043123(positive regulation of I-kappaB kinase/NF-kappaB signaling);GO:0007165(signal transduction);GO:0006470(protein dephosphorylation);GO:0043531(ADP binding);GO:0042802(identical protein binding);GO:0016787(hydrolase activity);GO:0005524(ATP binding);GO:0004…	04010(MAPK signaling pathway)
ciRNA30	26	111	53	29	29	10	20	15	17	0	40	2	1.3149	5.40938	2.5553	1.45829	1.55747	0.554904	1.10733	0.57643	0.87918	0	1.2812	0.0705754	chr13	22801030	22801863	+	1	ciRNA	-	ENSSSCT00000012305	ARPP21	mRNA	chr13:22801029-22801911	cAMP regulated phosphoprotein 21 [Source:HGNC Symbol;Acc:HGNC:16968]	GO:0034605(cellular response to heat);GO:0003676(nucleic acid binding)	NA
ciRNA31	2.33333	4.33333	3	2.33333	1.33333	1.33333	1	6.33333	6.66667	0	0	2.66667	0.25629	0.45865	0.314139	0.254834	0.155523	0.160691	0.120249	0.528594	0.748811	0	0	0.204375	chr12	1403301	1403684	+	1	ciRNA	-	ENSSSCT00000031734	SLC38A10	mRNA	chr12:1403300-1403708	solute carrier family 38 member 10 [Source:HGNC Symbol;Acc:HGNC:28237]	GO:0016021(integral component of membrane);GO:0016020(membrane);GO:0005794(Golgi apparatus);GO:0060348(bone development);GO:0003333(amino acid transmembrane transport);GO:0015171(amino acid transmembrane transporter activity)	NA
ciRNA32	18	74	43	31	20	7	3	0	6	0	0	0	2.23954	8.87203	5.10035	3.83508	2.64252	0.955613	0.408634	0	0.76339	0	0	0	chr16	34165012	34165350	+	1	ciRNA	-	ENSSSCT00000035637	ITGA2	mRNA	chr16:34165011-34191178	integrin subunit alpha 2 [Source:HGNC Symbol;Acc:HGNC:6137]	GO:0045178(basal part of cell);GO:0034666(integrin alpha2-beta1 complex);GO:0016021(integral component of membrane);GO:0016020(membrane);GO:0009986(cell surface);GO:0009897(external side of plasma membrane);GO:0008305(integrin complex);GO:0005925(focal adhesion);GO:0005886(plasma membrane);GO:0048333(mesodermal cell differentiation);GO:0038065(collagen-activated signaling pathway);GO:0033627(cell…	04151(PI3K-Akt signaling pathway);04512(ECM-receptor interaction);04145(Phagosome);04810(Regulation of actin cytoskeleton);04510(Focal adhesion);04640(Hematopoietic cell lineage);04611(Platelet activation);05200(Pathways in cancer);05205(Proteoglycans in cancer);05222(Small cell lung cancer);05410(Hypertrophic cardiomyopathy (HCM));05412(Arrhythmogenic right ventricular cardiomyopathy (ARVC));054…
ciRNA33	99	112	114	97	90	84	51	76	31	132	154	70	4.79406	5.22626	5.26281	4.67053	4.6282	4.46318	2.70374	2.79651	1.53511	4.19184	4.72308	2.36521	chr14	54269261	54270131	-	1	ciRNA	-	ENSSSCT00000028715	MED15	mRNA	chr14:54269200-54270131	mediator complex subunit 15 [Source:HGNC Symbol;Acc:HGNC:14248]	GO:0016592(mediator complex);GO:0016020(membrane);GO:0005634(nucleus);GO:0006357(regulation of transcription from RNA polymerase II promoter);GO:0001104(RNA polymerase II transcription cofactor activity)	NA
ciRNA34	65	34	25	58	39	101	70	64	79	37	5	34	7.92361	3.99387	2.90533	7.03015	5.04866	13.5092	9.3419	5.92823	9.84795	2.95784	0.386026	2.89196	chr14	55093635	55093980	+	1	ciRNA	-	ENSSSCT00000011095	TANGO2	mRNA	chr14:55093634-55094011	transport and golgi organization 2 homolog [Source:HGNC Symbol;Acc:HGNC:25439]	GO:0005794(Golgi apparatus)	NA
ciRNA35	12	21	7	16	14	35	31	0	8	99	27	28	2.48106	4.18389	1.37975	3.28929	3.07387	7.94002	7.01689	0	1.69143	13.4231	3.53555	4.0394	chr14	55130017	55130220	-	1	ciRNA	-	ENSSSCT00000011097	TRMT2A	mRNA	chr14:55129996-55130220	tRNA methyltransferase 2 homolog A [Source:HGNC Symbol;Acc:HGNC:24974]	GO:0032259(methylation);GO:0006396(RNA processing);GO:0001510(RNA methylation);GO:0016740(transferase activity);GO:0008173(RNA methyltransferase activity);GO:0008168(methyltransferase activity);GO:0003676(nucleic acid binding);GO:0000166(nucleotide binding)	NA
ciRNA36	34	22	41	7	19	38	3	1	0	2	7	0	0.655118	0.408477	0.753129	0.134111	0.388773	0.803381	0.0632833	0.0146412	0	0.0252716	0.0854231	0	chrX	124508876	124511064	-	1	ciRNA	-	ENSSSCT00000034072	MBNL3	mRNA	chrX:124508679-124511064	muscleblind like splicing regulator 3 [Source:HGNC Symbol;Acc:HGNC:20564]	GO:0046872(metal ion binding);GO:0045662(negative regulation of myoblast differentiation);GO:0043484(regulation of RNA splicing);GO:0003723(RNA binding)	NA
ciRNA37	0	0	11	0	3	13	9	0	0	0	0	0	0	0	2.55669	0	0.776717	3.47761	2.4022	0	0	0	0	0	chr6	50297003	50297175	+	1	ciRNA	-	ENSSSCT00000003516	ENSSSCG00000003166	mRNA	chr6:50297002-50297196	NA	GO:0030529(intracellular ribonucleoprotein complex);GO:0015934(large ribosomal subunit);GO:0005840(ribosome);GO:0006412(translation);GO:0003735(structural constituent of ribosome)	NA
ciRNA38	0	5	9	8	6	13	8	17	15	0	0	0	0	1.05842	1.88483	1.74744	1.39971	3.13347	1.92399	2.83772	3.36965	0	0	0	chr6	53232926	53233117	+	1	ciRNA	-	ENSSSCT00000003625	CNOT3	mRNA	chr6:53232925-53233144	CCR4-NOT transcription complex subunit 3 [Source:HGNC Symbol;Acc:HGNC:7879]	GO:0030015(CCR4-NOT core complex);GO:0030014(CCR4-NOT complex);GO:0005634(nucleus);GO:0000932(P-body);GO:2000036(regulation of stem cell population maintenance);GO:0017148(negative regulation of translation);GO:0006355(regulation of transcription, DNA-templated);GO:0001829(trophectodermal cell differentiation);GO:0000288(nuclear-transcribed mRNA catabolic process, deadenylation-dependent decay)	03018(RNA degradation)
ciRNA39	0	0	26	8	0	6	0	29	3	25	0	0	0	0	4.16515	1.33668	0	1.10627	0	3.70293	0.515516	2.75496	0	0	chr5	31816964	31817214	+	1	ciRNA	-	ENSSSCT00000025861	SRGAP1	mRNA	chr5:31816963-31819895	SLIT-ROBO Rho GTPase activating protein 1 [Source:HGNC Symbol;Acc:HGNC:17382]	GO:0005737(cytoplasm);GO:0043547(positive regulation of GTPase activity);GO:0030336(negative regulation of cell migration);GO:0007165(signal transduction);GO:0048365(Rac GTPase binding);GO:0005096(GTPase activator activity)	04360(Axon guidance)
ciRNA4	364.167	566.167	894.5	695.5	665.5	802.5	451.667	918.667	662.833	805	870.5	931.5	68.2659	102.271	159.856	129.636	132.481	165.062	92.6934	130.857	127.062	98.9607	103.35	121.84	chr6	54408323	54408547	+	1	ciRNA	-	ENSSSCT00000003665	PPP6R1	mRNA	chr6:54408322-54408568	protein phosphatase 6 regulatory subunit 1 [Source:HGNC Symbol;Acc:HGNC:29195]	GO:0005829(cytosol);GO:0043666(regulation of phosphoprotein phosphatase activity);GO:0019903(protein phosphatase binding)	NA
ciRNA40	8	1	13	27	5	0	11	53	34	0	0	7	2.2199	0.267391	3.43899	7.44959	1.47338	0	3.34166	11.1752	9.64784	0	0	1.35533	chr3	42366576	42366727	+	1	ciRNA	-	ENSSSCT00000008814	ENSSSCG00000008043	mRNA	chr3:42366575-42366795	NA	GO:0016567(protein ubiquitination);GO:0046872(metal ion binding);GO:0008270(zinc ion binding);GO:0004842(ubiquitin-protein transferase activity)	NA
ciRNA41	18	51	35	48	42	33	30	71	48	164	119	73	3.72159	10.1609	6.89873	9.86787	9.22161	7.4863	6.79054	11.1545	10.1486	22.2363	15.5826	10.5313	chr2	70490020	70490223	-	1	ciRNA	-	ENSSSCT00000014871	ZNF653	mRNA	chr2:70489998-70490223	zinc finger protein 653 [Source:HGNC Symbol;Acc:HGNC:25196]	GO:0046872(metal ion binding);GO:0003676(nucleic acid binding)	NA
ciRNA42	55	28	39	20	14	17	35	21	33	0	1	0	10.1301	4.96951	6.84795	3.66275	2.7383	3.43556	7.05742	2.93904	6.21546	0	0.116651	0	chr9	7568871	7569099	+	1	ciRNA	-	ENSSSCT00000016162	INPPL1	mRNA	chr9:7568870-7569123	inositol polyphosphate phosphatase like 1 [Source:HGNC Symbol;Acc:HGNC:6080]	GO:0005886(plasma membrane);GO:0005829(cytosol);GO:0005794(Golgi apparatus);GO:0005737(cytoplasm);GO:0097178(ruffle assembly);GO:0046856(phosphatidylinositol dephosphorylation);GO:0044255(cellular lipid metabolic process);GO:0032868(response to insulin);GO:0010629(negative regulation of gene expression);GO:0009791(post-embryonic development);GO:0008285(negative regulation of cell proliferation);G…	00562(Inositol phosphate metabolism);04070(Phosphatidylinositol signaling system);04662(B cell receptor signaling pathway);04666(Fc gamma R-mediated phagocytosis);04910(Insulin signaling pathway)
ciRNA43	26	3.5	16.5	3.5	3.5	7.5	3	17.5	9	13.5	1	30.5	4.40413	0.571294	2.6645	0.589496	0.629588	1.39394	0.556334	2.25248	1.55897	1.49963	0.107281	3.60487	chr12	55516516	55516764	+	1	ciRNA	-	ENSSSCT00000019548	CHD3	mRNA	chr12:55516515-55516789	chromodomain helicase DNA binding protein 3 [Source:HGNC Symbol;Acc:HGNC:1918]	GO:0016581(NuRD complex);GO:0005815(microtubule organizing center);GO:0005813(centrosome);GO:0005737(cytoplasm);GO:0005730(nucleolus);GO:0005634(nucleus);GO:0051297(centrosome organization);GO:0007051(spindle organization);GO:0006355(regulation of transcription, DNA-templated);GO:0006333(chromatin assembly or disassembly);GO:0006325(chromatin organization);GO:0046872(metal ion binding);GO:0016818…	NA
ciRNA44	70	97	143	122	72	48	94	207	98	270	235	270	5.43731	7.26044	10.5893	9.42264	5.9391	4.09096	7.99358	12.2178	7.78433	13.7535	11.5609	14.6337	chr10	35105743	35106285	+	1	ciRNA	-	ENSSSCT00000025854	ENSSSCG00000022760	mRNA	chr10:35105742-35106324	NA	GO:0006396(RNA processing);GO:0006366(transcription from RNA polymerase II promoter);GO:0006357(regulation of transcription from RNA polymerase II promoter);GO:0003723(RNA binding);GO:0003677(DNA binding);GO:0003676(nucleic acid binding)	03040(Spliceosome);05206(MicroRNAs in cancer);05203(Viral carcinogenesis);05168(Herpes simplex infection)
ciRNA45	52	46	17	33	19	32	16	16	12	0	0	0	23.8397	20.3217	7.43006	15.0431	9.25025	16.097	8.03056	5.57383	5.62585	0	0	0	chr15	87880544	87880635	+	1	ciRNA	-	ENSSSCT00000017372	ITGA6	mRNA	chr15:87880543-87881790	integrin subunit alpha 6 [Source:HGNC Symbol;Acc:HGNC:6142]	GO:0016021(integral component of membrane);GO:0016020(membrane);GO:0008305(integrin complex);GO:0007229(integrin-mediated signaling pathway);GO:0007155(cell adhesion);GO:0045178(basal part of cell);GO:0030056(hemidesmosome);GO:0016323(basolateral plasma membrane);GO:0009986(cell surface);GO:0009925(basal plasma membrane);GO:0009897(external side of plasma membrane);GO:0005925(focal adhesion);GO:0…	04151(PI3K-Akt signaling pathway);04512(ECM-receptor interaction);04514(Cell adhesion molecules (CAMs));04810(Regulation of actin cytoskeleton);04510(Focal adhesion);04640(Hematopoietic cell lineage);05200(Pathways in cancer);05222(Small cell lung cancer);05410(Hypertrophic cardiomyopathy (HCM));05412(Arrhythmogenic right ventricular cardiomyopathy (ARVC));05414(Dilated cardiomyopathy (DCM));0514…
ciRNA46	12	8	32	27	13	43	33	23	18	0	18	5	1.90277	1.22236	4.83726	4.25691	2.18902	7.48118	5.72856	2.7712	2.91867	0	1.80765	0.553194	chr14	54267975	54268240	-	1	ciRNA	-	ENSSSCT00000028715	MED15	mRNA	chr14:54267950-54268240	mediator complex subunit 15 [Source:HGNC Symbol;Acc:HGNC:14248]	GO:0016592(mediator complex);GO:0016020(membrane);GO:0005634(nucleus);GO:0006357(regulation of transcription from RNA polymerase II promoter);GO:0001104(RNA polymerase II transcription cofactor activity)	NA
ciRNA47	0	8	0	2	4	0	1	13	4	0	0	0	0	1.04549	0	0.269701	0.576086	0	0.148475	1.33969	0.554746	0	0	0	chr7	43203774	43204084	+	1	ciRNA	-	ENSSSCT00000001825	ENSSSCG00000001641	mRNA	chr7:43203773-43204084	NA	GO:0005737(cytoplasm);GO:0000151(ubiquitin ligase complex);GO:0071596(ubiquitin-dependent protein catabolic process via the N-end rule pathway);GO:0033522(histone H2A ubiquitination);GO:0030163(protein catabolic process);GO:0006342(chromatin silencing);GO:0061630(ubiquitin protein ligase activity);GO:0008270(zinc ion binding)	NA
ciRNA48	24	80	14	40	10	12	20	39	53	41	35	38	2.66387	8.55652	1.48141	4.41457	1.1787	1.46144	2.4303	3.28929	6.01571	2.98435	2.46041	2.94299	chr6	76818790	76819169	+	1	ciRNA	-	ENSSSCT00000003948	ENSSSCG00000003554	mRNA	chr6:76818789-76819173	NA	NA	NA
ciRNA49	268	265	194	240	177	201	52	80	77	47	82	29	13.1133	12.4948	9.04953	11.6766	9.19716	10.7913	2.78554	2.97443	3.85282	1.50813	2.54115	0.990102	chr6	83591159	83592020	+	1	ciRNA	-	ENSSSCT00000024539	ENSSSCG00000025344	mRNA	chr6:83591158-83592020	NA	GO:0005634(nucleus);GO:0008270(zinc ion binding)	NA
ciRNA5	0.5	0	0	7	2	0	0	0	0.5	0	0	0	0.0587437	0	0	0.817741	0.24953	0	0	0	0.0600718	0	0	0	chr6	85032674	85033032	-	1	ciRNA	-	ENSSSCT00000004023	ZMYM4	mRNA	chr6:85031914-85033032	zinc finger MYM-type containing 4 [Source:HGNC Symbol;Acc:HGNC:13055]	GO:0022604(regulation of cell morphogenesis);GO:0007010(cytoskeleton organization);GO:0008270(zinc ion binding)	NA
ciRNA50	0	4	3	8	2	4	0	0.5	5	0	0	0	0	0.928994	0.68931	1.91719	0.511894	1.0578	0	0.09157	1.23233	0	0	0	chr5	19138908	19139082	-	1	ciRNA	-	ENSSSCT00000000295	MAP3K12	mRNA	chr5:19138881-19139082	mitogen-activated protein kinase kinase kinase 12 [Source:HGNC Symbol;Acc:HGNC:6851]	GO:0030426(growth cone);GO:0030424(axon);GO:0005886(plasma membrane);GO:0005829(cytosol);GO:0005737(cytoplasm);GO:2000672(negative regulation of motor neuron apoptotic process);GO:0046777(protein autophosphorylation);GO:0018107(peptidyl-threonine phosphorylation);GO:0018105(peptidyl-serine phosphorylation);GO:0016572(histone phosphorylation);GO:0016310(phosphorylation);GO:0007254(JNK cascade);GO:…	04010(MAPK signaling pathway)
ciRNA51	0	0	3	7	2	0	3	12	1	0	0	0	0	0	0.600146	1.46054	0.445679	0	0.689189	1.9134	0.214585	0	0	0	chr5	110681176	110681376	+	1	ciRNA	-	ENSSSCT00000001062	TUBGCP6	mRNA	chr5:110681175-110681376	tubulin gamma complex associated protein 6 [Source:HGNC Symbol;Acc:HGNC:18127]	GO:0070062(extracellular exosome);GO:0016020(membrane);GO:0008274(gamma-tubulin ring complex);GO:0005815(microtubule organizing center);GO:0005813(centrosome);GO:0000923(equatorial microtubule organizing center);GO:0000922(spindle pole);GO:0090307(mitotic spindle assembly);GO:0051415(interphase microtubule nucleation by interphase microtubule organizing center);GO:0051298(centrosome duplication);…	NA
ciRNA52	8.83333	3	5	7.5	2	2.16667	2.16667	4.66667	3.83333	0	3	1.66667	1.49029	0.487722	0.804195	1.25815	0.358326	0.401084	0.400189	0.598258	0.66135	0	0.320556	0.1962	chr4	42011772	42012021	-	1	ciRNA	-	ENSSSCT00000006674	LAPTM4B	mRNA	chr4:42011654-42012021	lysosomal protein transmembrane 4 beta [Source:HGNC Symbol;Acc:HGNC:13646]	GO:0016021(integral component of membrane);GO:0016020(membrane)	NA
ciRNA53	0	0	0	61	45	6	60	150	61	0	0	26	0	0	0	5.34081	4.20789	0.579695	5.78401	10.0364	5.49274	0	0	1.59745	chr3	7325378	7325856	-	1	ciRNA	-	ENSSSCT00000008390	STAG3	mRNA	chr3:7325351-7325856	stromal antigen 3 [Source:HGNC Symbol;Acc:HGNC:11356]	GO:0034991(nuclear meiotic cohesin complex);GO:0030893(meiotic cohesin complex);GO:0001673(male germ cell nucleus);GO:0000802(transverse filament);GO:0000800(lateral element);GO:0000795(synaptonemal complex);GO:0000794(condensed nuclear chromosome);GO:0034502(protein localization to chromosome);GO:0007129(synapsis)	04114(Oocyte meiosis)
ciRNA54	7	5	1	94	75	84	85	256	138	148	221	164	0.831679	0.572443	0.113267	11.1048	9.46282	10.9505	11.0562	23.1118	16.7666	11.5314	16.6298	13.5958	chr3	38897456	38897810	-	1	ciRNA	-	ENSSSCT00000008704	HMOX2	mRNA	chr3:38897431-38897810	heme oxygenase 2 [Source:HGNC Symbol;Acc:HGNC:5014]	GO:0016021(integral component of membrane);GO:0016020(membrane);GO:0055114(oxidation-reduction process);GO:0055072(iron ion homeostasis);GO:0042167(heme catabolic process);GO:0006979(response to oxidative stress);GO:0006788(heme oxidation);GO:0020037(heme binding);GO:0004392(heme oxygenase (decyclizing) activity)	00860(Porphyrin and chlorophyll metabolism);04978(Mineral absorption)
ciRNA55	5.66667	14	9	5.66667	16	10.3333	4.33333	4.66667	7.33333	0	0	0	0.0694187	0.165265	0.105108	0.0690245	0.208147	0.138895	0.0581164	0.0434401	0.0918669	0	0	0	chr3	62647028	62650470	-	1	ciRNA	-	ENSSSCT00000009026	KCMF1	mRNA	chr3:62647008-62650470	potassium channel modulatory factor 1 [Source:HGNC Symbol;Acc:HGNC:20589]	GO:0046872(metal ion binding);GO:0008270(zinc ion binding)	NA
ciRNA56	0	2	0	1	4	0	2	3	4	25	0	0	0	0.5606	0	0.289231	1.23561	0	0.636906	0.663093	1.18984	4.76893	0	0	chr3	118746800	118746944	+	1	ciRNA	-	ENSSSCT00000024681	NRBP1	mRNA	chr3:118746799-118746945	nuclear receptor binding protein 1 [Source:HGNC Symbol;Acc:HGNC:7993]	GO:0048471(perinuclear region of cytoplasm);GO:0012505(endomembrane system);GO:0005829(cytosol);GO:0035556(intracellular signal transduction);GO:0006888(ER to Golgi vesicle-mediated transport);GO:0006468(protein phosphorylation);GO:0042803(protein homodimerization activity);GO:0042802(identical protein binding);GO:0005524(ATP binding);GO:0004674(protein serine/threonine kinase activity);GO:000467…	NA
ciRNA57	0	6	1	3	3.5	2.5	0	0	5	8	5	0	0	1.37	0.225897	0.706828	0.880716	0.649985	0	0	1.21156	1.24314	0.750366	0	chr2	16211096	16211273	-	1	ciRNA	-	ENSSSCT00000014449	NDUFS3	mRNA	chr2:16211067-16211273	NADH:ubiquinone oxidoreductase core subunit S3 [Source:HGNC Symbol;Acc:HGNC:7710]	GO:0043209(myelin sheath);GO:0031966(mitochondrial membrane);GO:0016604(nuclear body);GO:0005747(mitochondrial respiratory chain complex I);GO:0005743(mitochondrial inner membrane);GO:0005739(mitochondrion);GO:2001243(negative regulation of intrinsic apoptotic signaling pathway);GO:0072593(reactive oxygen species metabolic process);GO:0055114(oxidation-reduction process);GO:0045333(cellular respi…	00190(Oxidative phosphorylation);05010(Alzheimer's disease);05012(Parkinson's disease);05016(Huntington's disease);04932(Non-alcoholic fatty liver disease (NAFLD))
ciRNA58	6	19	2	24	16	3	20	21	34	62	62	111	0.660752	2.01626	0.209973	2.628	1.87115	0.362498	2.41126	1.75728	3.82891	4.47757	4.3243	8.5293	chr1	302615382	302615764	-	1	ciRNA	-	ENSSSCT00000006202	CIZ1	mRNA	chr1:302615354-302615764	CDKN1A interacting zinc finger protein 1 [Source:HGNC Symbol;Acc:HGNC:16744]	GO:0005886(plasma membrane);GO:0005654(nucleoplasm);GO:0005634(nucleus);GO:0051457(maintenance of protein location in nucleus);GO:0032298(positive regulation of DNA-dependent DNA replication initiation);GO:0046872(metal ion binding);GO:0030332(cyclin binding);GO:0008270(zinc ion binding);GO:0003676(nucleic acid binding)	NA
ciRNA59	196	145	107	111	125	139	33	69	71	5	54	47	13.9643	9.9549	7.26764	7.86346	9.4575	10.8662	2.57398	3.7355	5.17287	0.233613	2.43666	2.3365	chr1	303326534	303327125	+	1	ciRNA	-	ENSSSCT00000006230	NUP188	mRNA	chr1:303326533-303327125	nucleoporin 188 [Source:HGNC Symbol;Acc:HGNC:17859]	GO:0044611(nuclear pore inner ring);GO:0016020(membrane);GO:0090521(glomerular visceral epithelial cell migration);GO:0006606(protein import into nucleus);GO:0006405(RNA export from nucleus);GO:0017056(structural constituent of nuclear pore)	03013(RNA transport)
ciRNA6	16	9	0	7	5	5	10	45	30	33	0	0	1.45756	0.790046	0	0.634059	0.483701	0.499773	0.997315	3.11496	2.7947	1.97143	0	0	chr5	23137220	23137682	-	1	ciRNA	-	ENSSSCT00000032096	ENSSSCG00000022002	mRNA	chr5:23137213-23137682	NA	GO:0090544(BAF-type complex);GO:0005634(nucleus);GO:0006357(regulation of transcription from RNA polymerase II promoter);GO:0006338(chromatin remodeling);GO:0003677(DNA binding)	NA
ciRNA60	39	3	18	11	50	11	15	61	16	0	7	76	5.85389	0.433916	2.57571	1.64172	7.96988	1.81163	2.46489	6.95737	2.45589	0	0.665449	7.9597	chr9	49249249	49249529	-	1	ciRNA	-	ENSSSCT00000016432	ZPR1	mRNA	chr9:49249222-49249529	ZPR1 zinc finger [Source:HGNC Symbol;Acc:HGNC:13051]	GO:0097504(Gemini of coiled bodies);GO:0043204(perikaryon);GO:0043025(neuronal cell body);GO:0032797(SMN complex);GO:0030426(growth cone);GO:0030424(axon);GO:0015030(Cajal body);GO:0005737(cytoplasm);GO:0005730(nucleolus);GO:0005654(nucleoplasm);GO:0005634(nucleus);GO:2000672(negative regulation of motor neuron apoptotic process);GO:1990261(pre-mRNA catabolic process);GO:1902742(apoptotic process…	NA
ciRNA61	0	0	15	2	0	0	1	7	7	0	2	0	0	0	2.02398	0.281466	0	0	0.154952	0.752841	1.01316	0	0.179282	0	chr8	89346718	89347015	-	1	ciRNA	-	ENSSSCT00000009907	SMARCA5	mRNA	chr8:89346689-89347015	SWI/SNF related, matrix associated, actin dependent regulator of chromatin, subfamily a, member 5 [Source:HGNC Symbol;Acc:HGNC:11101]	GO:0043596(nuclear replication fork);GO:0031213(RSF complex);GO:0031010(ISWI-type complex);GO:0016589(NURF complex);GO:0005677(chromatin silencing complex);GO:0005634(nucleus);GO:0001650(fibrillar center);GO:0000793(condensed chromosome);GO:0045893(positive regulation of transcription, DNA-templated);GO:0043044(ATP-dependent chromatin remodeling);GO:0016584(nucleosome positioning);GO:0006352(DNA-…	NA
ciRNA62	0	0	0	5	4	8	22	29	18	0	6	0	0	0	0	1.21209	1.03562	2.14007	5.87205	5.37246	4.48767	0	0.926463	0	chr13	25168105	25168277	+	1	ciRNA	-	ENSSSCT00000012316	ENSSSCG00000011249	mRNA	chr13:25168104-25168315	NA	GO:0008285(negative regulation of cell proliferation)	NA
ciRNA63	22	16	15	67	33	55	49	75	65	0	16	12	3.83436	2.68717	2.49234	11.6111	6.10782	10.5179	9.34962	9.9327	11.5849	0	1.76615	1.45934	chr13	37851873	37852114	+	1	ciRNA	-	ENSSSCT00000012523	STAB1	mRNA	chr13:37851872-37852140	stabilin 1 [Source:HGNC Symbol;Acc:HGNC:18628]	GO:0016021(integral component of membrane);GO:0016020(membrane);GO:0005887(integral component of plasma membrane);GO:0042742(defense response to bacterium);GO:0016525(negative regulation of angiogenesis);GO:0007267(cell-cell signaling);GO:0007155(cell adhesion);GO:0006898(receptor-mediated endocytosis);GO:0030169(low-density lipoprotein particle binding);GO:0005540(hyaluronic acid binding);GO:000…	NA
ciRNA64	297	404.5	332	391	346	372	652	663	414	257	264	375	15.1474	19.8794	16.1422	19.8282	18.7395	20.8171	36.4045	25.6939	21.5918	8.59561	8.52749	13.3449	chr13	133973502	133974328	+	1	ciRNA	-	ENSSSCT00000012915	EIF4A2	mRNA	chr13:133973501-133974328	eukaryotic translation initiation factor 4A2 [Source:HGNC Symbol;Acc:HGNC:3284]	GO:0048471(perinuclear region of cytoplasm);GO:1900260(negative regulation of RNA-directed 5'-3' RNA polymerase activity);GO:0010501(RNA secondary structure unwinding);GO:0010468(regulation of gene expression);GO:0006413(translational initiation);GO:0016887(ATPase activity);GO:0016787(hydrolase activity);GO:0005524(ATP binding);GO:0004386(helicase activity);GO:0004004(ATP-dependent RNA helicase a…	03013(RNA transport)
ciRNA65	0	0	0	1	0	0	0	0	0	0	0	0	0	0	0	0.260487	0	0	0	0	0	0	0	0	chr12	55562448	55562608	+	1	ciRNA	-	ENSSSCT00000019553	CNTROB	mRNA	chr12:55562447-55562634	centrobin, centriole duplication and spindle assembly protein [Source:HGNC Symbol;Acc:HGNC:29616]	GO:0005829(cytosol);GO:0005814(centriole);GO:0005813(centrosome);GO:1902410(mitotic cytokinetic process);GO:0051299(centrosome separation);GO:0007099(centriole replication);GO:0019904(protein domain specific binding)	NA
ciRNA66	0	0	0	3.5	0.5	0	8	0	1	0	0	0	0	0	0	0.378311	0.05772	0	0.952076	0	0.111164	0	0	0	chr15	67054919	67055306	-	1	ciRNA	-	ENSSSCT00000017278	PRPF40A	mRNA	chr15:67053159-67055306	pre-mRNA processing factor 40 homolog A [Source:HGNC Symbol;Acc:HGNC:16463]	GO:0071004(U2-type prespliceosome);GO:0016607(nuclear speck);GO:0016363(nuclear matrix);GO:0016020(membrane);GO:0005829(cytosol);GO:0005685(U1 snRNP);GO:0005634(nucleus);GO:0032465(regulation of cytokinesis);GO:0016477(cell migration);GO:0008360(regulation of cell shape);GO:0007010(cytoskeleton organization);GO:0000398(mRNA splicing, via spliceosome);GO:0070064(proline-rich region binding);GO:000…	03040(Spliceosome)
ciRNA67	3.5	0	11	4.5	4	14	6.5	28.5	8	0	9.5	1	0.505558	0	1.51475	0.646312	0.613571	2.21885	1.02788	3.12812	1.18169	0	0.869088	0.100787	chr14	49663274	49663565	-	1	ciRNA	-	ENSSSCT00000010945	NIPSNAP1	mRNA	chr14:49663247-49663565	nipsnap homolog 1 [Source:HGNC Symbol;Acc:HGNC:7827]	GO:0097060(synaptic membrane);GO:0016020(membrane);GO:0005743(mitochondrial inner membrane);GO:0005739(mitochondrion);GO:0019233(sensory perception of pain);GO:0042165(neurotransmitter binding)	NA
ciRNA68	66	95.5	41	203	126	83	155	179	151	0	18	31	10.874	15.1619	6.43984	33.2559	22.0454	15.0045	27.9579	22.4096	25.4409	0	1.87826	3.56378	chr14	53079475	53079730	+	1	ciRNA	-	ENSSSCT00000032714	GGT1	mRNA	chr14:53079474-53079749	NA	GO:0031982(vesicle);GO:0050727(regulation of inflammatory response);GO:0019344(cysteine biosynthetic process);GO:0007283(spermatogenesis);GO:0006751(glutathione catabolic process);GO:0006750(glutathione biosynthetic process);GO:0006508(proteolysis);GO:0002682(regulation of immune system process);GO:0036374(glutathione hydrolase activity);GO:0016021(integral component of membrane);GO:0016020(membr…	00590(Arachidonic acid metabolism);00430(Taurine and hypotaurine metabolism);00460(Cyanoamino acid metabolism);00480(Glutathione metabolism)
ciRNA69	29	29	38	20	34	32	4	24	15	0	0	0	4.79671	4.6222	5.99204	3.28929	5.97209	5.80756	0.724325	3.01643	2.53715	0	0	0	chrX	46782033	46782287	-	1	ciRNA	-	ENSSSCT00000013417	UBA1	mRNA	chrX:46781989-46782287	ubiquitin like modifier activating enzyme 1 [Source:HGNC Symbol;Acc:HGNC:12469]	GO:0006464(cellular protein modification process);GO:0016874(ligase activity);GO:0008641(small protein activating enzyme activity);GO:0005524(ATP binding);GO:0000166(nucleotide binding);GO:0070062(extracellular exosome);GO:0030867(rough endoplasmic reticulum membrane);GO:0030057(desmosome);GO:0010008(endosome membrane);GO:0005829(cytosol);GO:0005765(lysosomal membrane);GO:0005739(mitochondrion);G…	04120(Ubiquitin mediated proteolysis);05012(Parkinson's disease)
ciRNA7	4.5	10	3.5	4	5.5	0	1.5	4.5	2.5	0	25.5	2.5	0.370705	0.793818	0.274871	0.327644	0.48115	0	0.13528	0.281685	0.210603	0	1.33043	0.143701	chr5	23614803	23615314	-	1	ciRNA	-	ENSSSCT00000032195	BAZ2A	mRNA	chr5:23614688-23615314	bromodomain adjacent to zinc finger domain 2A [Source:HGNC Symbol;Acc:HGNC:962]	GO:0016607(nuclear speck);GO:0005829(cytosol);GO:0005634(nucleus);GO:0046872(metal ion binding);GO:0042393(histone binding);GO:0008270(zinc ion binding);GO:0003677(DNA binding);GO:0001164(RNA polymerase I CORE element sequence-specific DNA binding)	NA
ciRNA70	26.5	23	29	43.5	20.5	26	45.5	47	33	10	34	25	2.88071	2.40928	3.00537	4.70186	2.36652	3.10117	5.41493	3.88229	3.6684	0.712882	2.34083	1.89626	chrX	50891350	50891737	+	1	ciRNA	-	ENSSSCT00000013470	MAGED4B	mRNA	chrX:50891349-50891761	NA	NA	NA
ciRNA71	3	5	1.5	11	4	2	10.5	33.5	9	41	46	9	0.445542	0.715554	0.212375	1.62438	0.630855	0.325908	1.7072	3.78049	1.36684	3.99314	4.32676	0.932639	chr7	80963949	80964232	-	1	ciRNA	-	ENSSSCT00000002260	PPP1R3E	mRNA	chr7:80963930-80964232	protein phosphatase 1 regulatory subunit 3E [Source:HGNC Symbol;Acc:HGNC:14943]	NA	NA
ciRNA72	1.5	5.5	12	4	3.5	7.5	5	10.5	10.5	0	4.5	0	0.239648	0.846739	1.82772	0.635431	0.593816	1.31474	0.87454	1.2747	1.71546	0	0.455336	0	chr6	13295220	13295483	-	1	ciRNA	-	ENSSSCT00000024246	ENSSSCG00000025121	mRNA	chr6:13295191-13295483	NA	GO:0005759(mitochondrial matrix);GO:0055114(oxidation-reduction process);GO:0016491(oxidoreductase activity)	NA
ciRNA73	364.167	566.167	894.5	695.5	665.5	802.5	451.667	918.667	662.833	805	870.5	931.5	68.8781	103.188	161.29	130.799	133.669	166.542	93.5248	132.031	128.202	99.8482	104.277	122.933	chr6	54408323	54408545	+	1	ciRNA	-	ENSSSCT00000003665	PPP6R1	mRNA	chr6:54408322-54408568	protein phosphatase 6 regulatory subunit 1 [Source:HGNC Symbol;Acc:HGNC:29195]	GO:0005829(cytosol);GO:0043666(regulation of phosphoprotein phosphatase activity);GO:0019903(protein phosphatase binding)	NA
ciRNA74	0	0	2	0	9	1	3	0	5	5	0	0	0	0	0.414534	0	2.07792	0.238551	0.714057	0	1.11164	0.712882	0	0	chr5	86389558	86389751	+	1	ciRNA	-	ENSSSCT00000028915	ENSSSCG00000000862	mRNA	chr5:86389557-86389792	NA	GO:0016021(integral component of membrane);GO:0016020(membrane);GO:0016772(transferase activity, transferring phosphorus-containing groups);GO:0005509(calcium ion binding)	04142(Lysosome)
ciRNA75	8	14	2	0	26	3	0	1	11	0	0	0	1.03504	1.74543	0.246686	0	3.57226	0.42588	0	0.0983114	1.45536	0	0	0	chr4	103042303	103042628	+	1	ciRNA	-	ENSSSCT00000007127	ENSSSCG00000006507	mRNA	chr4:103042302-103043157	NA	GO:0015935(small ribosomal subunit);GO:0005763(mitochondrial small ribosomal subunit);GO:0005761(mitochondrial ribosome);GO:0006915(apoptotic process);GO:0003735(structural constituent of ribosome)	NA
ciRNA76	13	5	0	16	1	0	5	8	3	0	0	0	2.46988	0.915393	0	3.02259	0.20176	0	1.03999	1.15494	0.582858	0	0	0	chr4	139780011	139780232	+	1	ciRNA	-	ENSSSCT00000007587	GTF2B	mRNA	chr4:139780010-139784355	general transcription factor IIB [Source:HGNC Symbol;Acc:HGNC:4648]	GO:0016604(nuclear body);GO:0005669(transcription factor TFIID complex);GO:0005634(nucleus);GO:0050434(positive regulation of viral transcription);GO:0006355(regulation of transcription, DNA-templated);GO:0006352(DNA-templated transcription, initiation);GO:0046966(thyroid hormone receptor binding);GO:0046872(metal ion binding);GO:0017025(TBP-class protein binding);GO:0008270(zinc ion binding);GO:…	03022(Basal transcription factors);05203(Viral carcinogenesis);05169(Epstein-Barr virus infection)
ciRNA77	15	32	42	123	161	145	120	319	158	10	0	17	1.50278	3.08929	4.01142	12.2528	17.129	15.9393	13.1617	24.2846	16.1871	0.657003	0	1.18838	chr3	39847477	39847897	+	1	ciRNA	-	ENSSSCT00000008715	TRAP1	mRNA	chr3:39847476-39847925	TNF receptor-associated protein 1 [Source:RefSeq peptide;Acc:NP_001230874]	GO:0070062(extracellular exosome);GO:0016020(membrane);GO:0005759(mitochondrial matrix);GO:0005743(mitochondrial inner membrane);GO:0005739(mitochondrion);GO:0005654(nucleoplasm);GO:1901856(negative regulation of cellular respiration);GO:0009386(translational attenuation);GO:0006950(response to stress);GO:0006457(protein folding);GO:0051082(unfolded protein binding);GO:0019901(protein kinase bind…	NA
ciRNA78	7	0	10	0	1.5	3	2	0	2.33333	13.5	0	0	1.92971	0	2.62809	0	0.439124	0.907431	0.603604	0	0.657779	2.44057	0	0	chr3	42989384	42989536	-	1	ciRNA	-	ENSSSCT00000008841	ENSSSCG00000008068	mRNA	chr3:42985848-42989536	NA	GO:0005737(cytoplasm);GO:0006450(regulation of translational fidelity);GO:0006428(isoleucyl-tRNA aminoacylation);GO:0006418(tRNA aminoacylation for protein translation);GO:0006412(translation);GO:0016874(ligase activity);GO:0005524(ATP binding);GO:0004822(isoleucine-tRNA ligase activity);GO:0004812(aminoacyl-tRNA ligase activity);GO:0002161(aminoacyl-tRNA editing activity);GO:0000166(nucleotide b…	00970(Aminoacyl-tRNA biosynthesis)
ciRNA79	1	2	3	8	2	2	3	0	3	0	7	0	0.26527	0.511239	0.758675	2.11011	0.563405	0.582125	0.871239	0	0.813802	0	1.17604	0	chr3	71687760	71687918	+	1	ciRNA	-	ENSSSCT00000009052	ENSSSCG00000008266	mRNA	chr3:71687759-71687942	NA	GO:0016020(membrane);GO:0055114(oxidation-reduction process);GO:0006898(receptor-mediated endocytosis);GO:0016641(oxidoreductase activity, acting on the CH-NH2 group of donors, oxygen as acceptor);GO:0005507(copper ion binding);GO:0005044(scavenger receptor activity)	NA
ciRNA8	524	694	606.667	483	503	448	631	661	582	250	572	237	13.46	17.1782	14.8562	12.3363	13.7209	12.6267	17.7447	12.9018	15.2878	4.2113	9.30563	4.2478	chr5	64079531	64081172	+	1	ciRNA	-	ENSSSCT00000000680	YBX3	mRNA	chr5:64079530-64081190	Y-box binding protein 3 [Source:HGNC Symbol;Acc:HGNC:2428]	GO:0030529(intracellular ribonucleoprotein complex);GO:0005844(polysome);GO:0005829(cytosol);GO:0005737(cytoplasm);GO:0005634(nucleus);GO:1902219(negative regulation of intrinsic apoptotic signaling pathway in response to osmotic stress);GO:0071474(cellular hyperosmotic response);GO:0071356(cellular response to tumor necrosis factor);GO:0060546(negative regulation of necroptotic process);GO:00486…	04530(Tight junction)
ciRNA80	14	7	1	6	7	27	10	12	14	0	44	10	1.80579	0.870044	0.122966	0.769513	0.958822	3.8212	1.4121	1.17613	1.84661	0	3.59441	0.899998	chr2	5830687	5831013	+	1	ciRNA	-	ENSSSCT00000014194	SCYL1	mRNA	chr2:5830686-5831035	SCY1 like pseudokinase 1 [Source:HGNC Symbol;Acc:HGNC:14372]	GO:0030126(COPI vesicle coat);GO:0016020(membrane);GO:0005829(cytosol);GO:0005801(cis-Golgi network);GO:0005794(Golgi apparatus);GO:0005793(endoplasmic reticulum-Golgi intermediate compartment);GO:0005737(cytoplasm);GO:0006890(retrograde vesicle-mediated transport, Golgi to ER);GO:0006468(protein phosphorylation);GO:0045296(cadherin binding);GO:0005524(ATP binding);GO:0004672(protein kinase activ…	NA
ciRNA81	67	32	21	43	31	41	23	112	23	105	95	77	10.8689	5.00227	3.24771	6.93598	5.34043	7.29784	4.08477	13.8059	3.81548	11.1703	9.76053	8.71579	chr2	8458776	8459035	+	1	ciRNA	-	ENSSSCT00000023479	GANAB	mRNA	chr2:8458775-8459056	glucosidase II alpha subunit [Source:HGNC Symbol;Acc:HGNC:4138]	GO:0070062(extracellular exosome);GO:0031012(extracellular matrix);GO:0017177(glucosidase II complex);GO:0016020(membrane);GO:0008152(metabolic process);GO:0005975(carbohydrate metabolic process);GO:0030246(carbohydrate binding);GO:0016798(hydrolase activity, acting on glycosyl bonds);GO:0016787(hydrolase activity);GO:0004553(hydrolase activity, hydrolyzing O-glycosyl compounds);GO:0003824(cataly…	00510(N-Glycan biosynthesis);04141(Protein processing in endoplasmic reticulum)
ciRNA82	4	4	19	0	11	13	15	15	3	0	6	12	0.672159	0.647705	3.04377	0	1.96294	2.39692	2.7595	1.91531	0.515516	0	0.638558	1.40701	chr2	16626909	16627159	-	1	ciRNA	-	ENSSSCT00000014466	ENSSSCG00000013246	mRNA	chr2:16626883-16627159	NA	NA	NA
ciRNA83	20	7	13.5	7	4.5	1	10.5	14	8.5	12.5	0	6.5	1.60068	0.539856	1.03004	0.557057	0.382463	0.0878159	0.920009	0.85141	0.69567	0.656068	0	0.362988	chr2	62009995	62010521	-	1	ciRNA	-	ENSSSCT00000015107	SYDE1	mRNA	chr2:62009963-62010521	synapse defective Rho GTPase homolog 1 [Source:HGNC Symbol;Acc:HGNC:25824]	GO:0005737(cytoplasm);GO:0043087(regulation of GTPase activity);GO:0007165(signal transduction)	NA
ciRNA84	20	8	3	21	5	6	33	71	77	112	46	30	2.04252	0.787283	0.292081	2.13246	0.54226	0.672334	3.68958	5.50972	8.04147	7.50097	2.9753	2.13777	chr2	77991968	77992380	-	1	ciRNA	-	ENSSSCT00000014670	MUM1	mRNA	chr2:77991965-77992380	melanoma associated antigen (mutated) 1 [Source:HGNC Symbol;Acc:HGNC:29641]	GO:0005634(nucleus);GO:0006325(chromatin organization);GO:0006281(DNA repair);GO:0031491(nucleosome binding);GO:0005829(cytosol)	NA
ciRNA85	0	0	0	1	7	0	0	9	2	0	0	0	0	0	0	0.310655	2.32248	0	0	2.13663	0.638986	0	0	0	chr2	148249070	148249204	+	1	ciRNA	-	ENSSSCT00000029343	EIF4EBP3	mRNA	chr2:148249069-148249225	eukaryotic translation initiation factor 4E binding protein 3 [Source:HGNC Symbol;Acc:HGNC:3290]	GO:0016020(membrane);GO:0005737(cytoplasm);GO:0045947(negative regulation of translational initiation);GO:0008190(eukaryotic initiation factor 4E binding)	03013(RNA transport)
ciRNA86	50	39	29.5	56.5	58.5	55.5	57.5	106	50.5	202	115.5	145.5	7.22226	5.42841	4.06229	8.1148	8.97348	8.79617	9.09282	11.6344	7.45939	19.1345	10.5663	14.6646	chr2	149484429	149484720	-	1	ciRNA	-	ENSSSCT00000015725	HDAC3	mRNA	chr2:149484408-149484720	histone deacetylase 3 [Source:HGNC Symbol;Acc:HGNC:4854]	GO:0017053(transcriptional repressor complex);GO:0005886(plasma membrane);GO:0005876(spindle microtubule);GO:0005829(cytosol);GO:0005794(Golgi apparatus);GO:0005737(cytoplasm);GO:0005654(nucleoplasm);GO:0005634(nucleus);GO:0071498(cellular response to fluid shear stress);GO:0070932(histone H3 deacetylation);GO:0051225(spindle assembly);GO:0046329(negative regulation of JNK cascade);GO:0045944(pos…	04919(Thyroid hormone signaling pathway);05203(Viral carcinogenesis);05034(Alcoholism)
ciRNA87	46	61	41	45	35	40	6	6	1	0	22	0	7.3492	9.3911	6.2447	7.1486	5.93816	7.01196	1.04945	0.728398	0.163377	0	2.22609	0	chr1	33252297	33252560	+	1	ciRNA	-	ENSSSCT00000027054	SGK1	mRNA	chr1:33252296-33252560	serum/glucocorticoid regulated kinase 1 [Source:HGNC Symbol;Acc:HGNC:10810]	GO:0016607(nuclear speck);GO:0005829(cytosol);GO:0005737(cytoplasm);GO:0005634(nucleus);GO:0048812(neuron projection morphogenesis);GO:0035556(intracellular signal transduction);GO:0018105(peptidyl-serine phosphorylation);GO:0016310(phosphorylation);GO:0006974(cellular response to DNA damage stimulus);GO:0006468(protein phosphorylation);GO:0016740(transferase activity);GO:0016301(kinase activity)…	04068(FoxO signaling pathway);04151(PI3K-Akt signaling pathway);04960(Aldosterone-regulated sodium reabsorption)
ciRNA88	0	0	3.33333	2	3.33333	0	2	1.33333	4.66667	0	0	2.66667	0	0	0.728438	0.455853	0.811426	0	0.50191	0.232243	1.09392	0	0	0.426521	chr1	264044238	264044421	+	1	ciRNA	-	ENSSSCT00000005846	RUSC2	mRNA	chr1:264044237-264044447	RUN and SH3 domain containing 2 [Source:HGNC Symbol;Acc:HGNC:23625]	GO:0070062(extracellular exosome);GO:0031410(cytoplasmic vesicle);GO:0017137(Rab GTPase binding)	NA
ciRNA89	0	0	3.33333	2	3.33333	0	2	1.33333	4.66667	0	0	2.66667	0	0	0.720605	0.450951	0.802701	0	0.496513	0.229746	1.08215	0	0	0.421935	chr1	264044238	264044423	+	1	ciRNA	-	ENSSSCT00000005846	RUSC2	mRNA	chr1:264044237-264044447	RUN and SH3 domain containing 2 [Source:HGNC Symbol;Acc:HGNC:23625]	GO:0070062(extracellular exosome);GO:0031410(cytoplasmic vesicle);GO:0017137(Rab GTPase binding)	NA
ciRNA9	309	455.5	338	439	335.5	164.5	159	244.5	153.5	257	306	268	47.3927	67.3204	49.4214	66.949	54.6447	27.6832	26.6979	28.4949	24.0752	25.8494	29.7243	28.6808	chr5	65803799	65804073	+	1	ciRNA	-	ENSSSCT00000027869	ENSSSCG00000022925	mRNA	chr5:65803798-65804103	NA	GO:0016021(integral component of membrane);GO:0016020(membrane);GO:0005886(plasma membrane);GO:0005737(cytoplasm);GO:0002080(acrosomal membrane);GO:1904659(glucose transmembrane transport);GO:0070837(dehydroascorbic acid transport);GO:0055085(transmembrane transport);GO:0015758(glucose transport);GO:0006810(transport);GO:0055056(D-glucose transmembrane transporter activity);GO:0033300(dehydroasco…	NA
ciRNA90	38	29	20	47	42	19	0	0	0	0	23	16	3.77121	2.77332	1.89222	4.6379	4.42637	2.06894	0	0	0	0	1.44565	1.10795	chr1	286044642	286045066	-	1	ciRNA	-	ENSSSCT00000028192	ENSSSCG00000023894	mRNA	chr1:286044622-286045066	NA	NA	NA
ciRNA91	15	0	0	0	2	0	0	0	0	0	0	0	3.65705	0	0	0	0.517812	0	0	0	0	0	0	0	chr1	307042934	307043106	-	1	ciRNA	-	ENSSSCT00000025107	SLC2A6	mRNA	chr1:307042906-307043106	solute carrier family 2 member 6 [Source:HGNC Symbol;Acc:HGNC:11011]	GO:0016021(integral component of membrane);GO:0016020(membrane);GO:1904659(glucose transmembrane transport);GO:0055085(transmembrane transport);GO:0046323(glucose import);GO:0035428(hexose transmembrane transport);GO:0015992(proton transport);GO:0006810(transport);GO:0022891(substrate-specific transmembrane transporter activity);GO:0022857(transmembrane transporter activity);GO:0005355(glucose tr…	NA
ciRNA92	0	13	12	138	330	289	561	706	591	0	0	0	0	1.79716	1.64121	19.6854	50.2753	45.4919	88.1108	76.9624	86.7032	0	0	0	chr18	8464158	8464451	-	1	ciRNA	-	ENSSSCT00000017953	WEE2	mRNA	chr18:8463820-8464451	WEE1 homolog 2 [Source:HGNC Symbol;Acc:HGNC:19684]	GO:0005829(cytosol);GO:0005737(cytoplasm);GO:0005654(nucleoplasm);GO:0005634(nucleus);GO:1904145(negative regulation of meiotic cell cycle process involved in oocyte maturation);GO:1900194(negative regulation of oocyte maturation);GO:0060631(regulation of meiosis I);GO:0060283(negative regulation of oocyte development);GO:0051321(meiotic cell cycle);GO:0045736(negative regulation of cyclin-depend…	04110(Cell cycle)
ciRNA93	11	10	0	4	14	23	0	2	4	0	0	0	1.92514	1.68645	0	0.696074	2.60195	4.41666	0	0.265971	0.715876	0	0	0	chr18	12328204	12328444	+	1	ciRNA	-	ENSSSCT00000017988	CREB3L2	mRNA	chr18:12328203-12328484	cAMP responsive element binding protein 3 like 2 [Source:HGNC Symbol;Acc:HGNC:23720]	GO:0005783(endoplasmic reticulum);GO:0005654(nucleoplasm);GO:0005634(nucleus);GO:0051216(cartilage development);GO:0045944(positive regulation of transcription from RNA polymerase II promoter);GO:0045893(positive regulation of transcription, DNA-templated);GO:0034976(response to endoplasmic reticulum stress);GO:0030968(endoplasmic reticulum unfolded protein response);GO:0006888(ER to Golgi vesicl…	04668(TNF signaling pathway);04024(cAMP signaling pathway);04022(cGMP - PKG signaling pathway);04151(PI3K-Akt signaling pathway);04152(AMPK signaling pathway);04911(Insulin secretion);04922(Glucagon signaling pathway);04915(Estrogen signaling pathway);04918(Thyroid hormone synthesis);04916(Melanogenesis);04261(Adrenergic signaling in cardiomyocytes);04962(Vasopressin-regulated water reabsorption)…
ciRNA94	0	4	0	0	5	0	2	0	0	0	0	0	0	0.671793	0	0	0.925428	0	0.381617	0	0	0	0	0	chr8	21088042	21088283	+	1	ciRNA	-	ENSSSCT00000009587	STIM2	mRNA	chr8:21088041-21088285	stromal interaction molecule 2 [Source:HGNC Symbol;Acc:HGNC:19205]	GO:0005886(plasma membrane);GO:0005783(endoplasmic reticulum);GO:0032237(activation of store-operated calcium channel activity);GO:0006874(cellular calcium ion homeostasis);GO:0002115(store-operated calcium entry);GO:0005509(calcium ion binding);GO:0005246(calcium channel regulator activity)	04020(Calcium signaling pathway)
ciRNA95	0	0	6	0	1	0	0	0	0	0	0	0	0	0	0.670163	0	0.124419	0	0	0	0	0	0	0	chr8	50645795	50646154	+	1	ciRNA	-	ENSSSCT00000009724	RAPGEF2	mRNA	chr8:50645794-50651504	Rap guanine nucleotide exchange factor 2 [Source:HGNC Symbol;Acc:HGNC:16854]	GO:0048471(perinuclear region of cytoplasm);GO:0030139(endocytic vesicle);GO:0016324(apical plasma membrane);GO:0016020(membrane);GO:0005923(bicellular tight junction);GO:0005829(cytosol);GO:0005770(late endosome);GO:0005737(cytoplasm);GO:2000670(positive regulation of dendritic cell apoptotic process);GO:2000481(positive regulation of cAMP-dependent protein kinase activity);GO:1901888(regulation…	04015(Rap1 signaling pathway);04010(MAPK signaling pathway)
ciRNA96	8	16	7	9	9	7	19	31	14	31	0	3	1.66219	3.20343	1.38654	1.85934	1.98579	1.59583	4.32186	4.89426	2.97459	4.22391	0	0.434925	chr13	35425002	35425204	+	1	ciRNA	-	ENSSSCT00000012465	ENSSSCG00000011387	mRNA	chr13:35425001-35425235	NA	GO:0046872(metal ion binding);GO:0008270(zinc ion binding)	NA
ciRNA97	53	44	92	30	50	60	168	136	126	19	154	85	10.958	8.76624	18.1338	6.16742	10.9781	13.6115	38.027	21.3663	26.6401	2.57616	20.1657	12.2625	chr13	35431168	35431371	-	1	ciRNA	-	ENSSSCT00000012467	GMPPB	mRNA	chr13:35431167-35431371	GDP-mannose pyrophosphorylase B [Source:HGNC Symbol;Acc:HGNC:22932]	GO:0070062(extracellular exosome);GO:0005739(mitochondrion);GO:0005737(cytoplasm);GO:0009058(biosynthetic process);GO:0016779(nucleotidyltransferase activity);GO:0016740(transferase activity)	00051(Fructose and mannose metabolism);00520(Amino sugar and nucleotide sugar metabolism)
ciRNA98	7	6	0	8	5.5	7	1	5	13	0	0	0	1.38613	1.14489	0	1.57515	1.15657	1.5209	0.216787	0.752336	2.63244	0	0	0	chr13	37610124	37610336	+	1	ciRNA	-	ENSSSCT00000012513	WDR82	mRNA	chr13:37610123-37610359	WD repeat domain 82 [Source:HGNC Symbol;Acc:HGNC:28826]	GO:0072357(PTW/PP1 phosphatase complex);GO:0048188(Set1C/COMPASS complex);GO:0035097(histone methyltransferase complex);GO:0005730(nucleolus);GO:0005634(nucleus);GO:0000785(chromatin);GO:0000784(nuclear chromosome, telomeric region);GO:0080182(histone H3-K4 trimethylation);GO:0051568(histone H3-K4 methylation);GO:0042800(histone methyltransferase activity (H3-K4 specific));GO:0003682(chromatin bi…	03015(mRNA surveillance pathway)
ciRNA99	1251.17	1360.83	1329.33	754.667	872.667	1136.25	178.333	321.5	240.2	76.1667	99	36.3333	0.429583	0.450238	0.435122	0.25764	0.318187	0.428059	0.0670335	0.0838781	0.0843362	0.0171498	0.021528	0.00870443	chr13	138784781	138907624	-	1	ciRNA	-	ENSSSCT00000023418	FGF12	mRNA	chr13:138752693-138907624	fibroblast growth factor 12 [Source:HGNC Symbol;Acc:HGNC:3668]	GO:0005634(nucleus);GO:1905150(regulation of voltage-gated sodium channel activity);GO:0098908(regulation of neuronal action potential);GO:0050905(neuromuscular process);GO:0010765(positive regulation of sodium ion transport);GO:0008344(adult locomotory behavior);GO:0007268(chemical synaptic transmission);GO:0008083(growth factor activity)	NA
circRNA1	64	71	77	64	98	118	207	315	205	194	83	36	10.4224	11.1416	11.9543	10.3632	16.9478	21.0846	36.9049	38.9791	34.1389	20.7182	8.56054	4.09065	chr7	2153664	2158879	-	2	circRNA	-	ENSSSCT00000001096	SLC22A23	mRNA	chr7:2092058-2153663|chr7:2158879-2193623	solute carrier family 22 member 23 [Source:HGNC Symbol;Acc:HGNC:21106]	GO:0016021(integral component of membrane);GO:0016020(membrane);GO:0055085(transmembrane transport);GO:0015711(organic anion transport);GO:0022857(transmembrane transporter activity);GO:0008514(organic anion transmembrane transporter activity)	NA
circRNA10	11.1667	1.33333	7.33333	11.75	6	12.6667	64.3333	62.0833	32.4167	0.666667	16.3333	9.66667	2.23217	0.256831	1.3975	2.33544	1.27367	2.7782	14.0788	9.43005	6.62645	0.0873928	2.06783	1.34829	chr7	60967186	60968464	+	2	circRNA	-	ENSSSCT00000002087	ETFA	mRNA	chr7:60962443-60967185|chr7:60968464-60969384	electron transfer flavoprotein alpha subunit [Source:HGNC Symbol;Acc:HGNC:3481]	GO:0070062(extracellular exosome);GO:0033539(fatty acid beta-oxidation using acyl-CoA dehydrogenase);GO:0050660(flavin adenine dinucleotide binding);GO:0016491(oxidoreductase activity);GO:0009055(electron carrier activity)	NA
circRNA100	298	261.5	323	215	236.5	244	288	452.5	325.5	123	197	109.5	8.28	7.00149	8.55583	5.9399	6.97826	7.43878	8.76061	9.55363	9.24856	2.24121	3.46671	2.12291	chr4	37544234	37556944	-	11	circRNA	-	ENSSSCT00000033532	CU459197.4	mRNA	chr4:37539603-37544233|chr4:37556944-37565200	NA	GO:0043130(ubiquitin binding)	NA
circRNA1000	50	48.8333	78	51	38.6667	31.5	60.5	91	87.6667	85.6667	51	58.3333	4.80387	4.52108	7.14433	4.87212	3.94512	3.3207	6.36362	6.64352	8.61321	5.39755	3.10334	3.91058	chr18	2767700	2773593	-	3	circRNA	-	ENSSSCT00000017876	RBM33	mRNA	chr18:2762648-2767699|chr18:2773593-2780223	RNA binding motif protein 33 [Source:HGNC Symbol;Acc:HGNC:27223]	GO:0003723(RNA binding);GO:0003676(nucleic acid binding);GO:0000166(nucleotide binding)	NA
circRNA1001	24	47	45	12	19.5	40.1667	45	67.3333	33.1667	63.5	145.333	19.1667	4.04909	7.64097	7.23776	2.01305	3.49367	7.43549	8.31162	8.632	5.72212	7.02559	15.5292	2.25629	chr18	53783597	53784629	+	3	circRNA	-	ENSSSCT00000018206	TNS3	mRNA	chr18:53779316-53783596|chr18:53784629-53797236	tensin 3 [Source:HGNC Symbol;Acc:HGNC:21616]	GO:0005925(focal adhesion);GO:0005829(cytosol);GO:0048286(lung alveolus development);GO:0016477(cell migration);GO:0008284(positive regulation of cell proliferation)	NA
circRNA1002	9.33333	7.33333	10.3333	12.3333	13.3333	14	12.0833	25.3333	16.3333	17.6667	0	6	0.946301	0.716471	0.9988	1.24337	1.4356	1.55746	1.34124	1.95173	1.69347	1.17466	0	0.42447	chr9	7140968	7143222	+	2	circRNA	-	ENSSSCT00000016145	NUP98	mRNA	chr9:7137030-7140967|chr9:7143222-7146871	nucleoporin 98 [Source:HGNC Symbol;Acc:HGNC:8068]	GO:0044615(nuclear pore nuclear basket);GO:0044614(nuclear pore cytoplasmic filaments);GO:0043231(intracellular membrane-bounded organelle);GO:0042405(nuclear inclusion body);GO:0034399(nuclear periphery);GO:0031965(nuclear membrane);GO:0031080(nuclear pore outer ring);GO:0005654(nucleoplasm);GO:0005643(nuclear pore);GO:0005635(nuclear envelope);GO:0000776(kinetochore);GO:0051292(nuclear pore com…	03013(RNA transport);05164(Influenza A)
circRNA1003	631	725	465	324	360	490	225	239	189	234	130	161	43.2753	47.913	30.4025	22.0944	26.2189	36.8727	16.8935	12.455	13.2551	10.5242	5.64665	7.70442	chr9	18942616	18948522	+	4	circRNA	-	ENSSSCT00000016254	PRCP	mRNA	chr9:18937658-18942615|chr9:18948522-18964038	prolylcarboxypeptidase [Source:HGNC Symbol;Acc:HGNC:9344]	GO:0070062(extracellular exosome);GO:0045178(basal part of cell);GO:2000377(regulation of reactive oxygen species metabolic process);GO:0097009(energy homeostasis);GO:0060055(angiogenesis involved in wound healing);GO:0043535(regulation of blood vessel endothelial cell migration);GO:0042593(glucose homeostasis);GO:0006508(proteolysis);GO:0003085(negative regulation of systemic arterial blood pres…	04974(Protein digestion and absorption)
circRNA1004	217	328	217	96	204	239.5	157	236	172	93	145	19	16.0855	23.4289	15.3348	7.07573	16.0585	19.4795	12.7409	13.2929	13.038	4.52085	6.80736	0.982722	chr9	22123762	22133076	-	7	circRNA	-	ENSSSCT00000016269	ENSSSCG00000014913	mRNA	chr9:22108992-22123761|chr9:22133076-22141006	phosphatidylinositol-binding clathrin assembly protein [Source:RefSeq peptide;Acc:NP_001233199]	GO:0030136(clathrin-coated vesicle);GO:0048268(clathrin coat assembly);GO:0006897(endocytosis);GO:0030276(clathrin binding);GO:0005545(1-phosphatidylinositol binding);GO:0005543(phospholipid binding)	NA
circRNA1005	41	82.5	56	76	23.5	57	218.5	274.5	203.5	79	219	101	7.26596	14.0886	9.46112	13.3921	4.42261	11.0836	42.3924	36.9647	36.8793	9.1812	24.5805	12.4892	chr9	22646535	22656477	-	2	circRNA	-	ENSSSCT00000016275	ME3	mRNA	chr9:22635202-22646534|chr9:22656477-22689055	malic enzyme 3 [Source:HGNC Symbol;Acc:HGNC:6985]	GO:0005739(mitochondrion);GO:0055114(oxidation-reduction process);GO:0006108(malate metabolic process);GO:0006090(pyruvate metabolic process);GO:0051287(NAD binding);GO:0046872(metal ion binding);GO:0004473(malate dehydrogenase (decarboxylating) (NADP+) activity);GO:0004471(malate dehydrogenase (decarboxylating) (NAD+) activity);GO:0004470(malic enzyme activity)	01200(Carbon metabolism);00620(Pyruvate metabolism)
circRNA1006	14	8.5	21.5	17	30	17.5	51	66.5	69	14	23.5	18	0.992424	0.580621	1.45296	1.19824	2.25835	1.36115	3.95792	3.582	5.00181	0.650819	1.05505	0.890317	chr9	29830958	29833681	+	4	circRNA	-	ENSSSCT00000016308	ENSSSCG00000014949	mRNA	chr9:29829797-29830957|chr9:29833681-29836165	NA	GO:0016592(mediator complex);GO:0019827(stem cell population maintenance);GO:0006357(regulation of transcription from RNA polymerase II promoter);GO:0001104(RNA polymerase II transcription cofactor activity)	04919(Thyroid hormone signaling pathway)
circRNA1007	7	6	3	1	2	6	8	6	0.333333	0	29	0	1.11414	0.92023	0.455205	0.158258	0.338043	1.04783	1.39398	0.725649	0.0542535	0	2.92331	0	chr9	40568081	40569423	+	2	circRNA	-	ENSSSCT00000029949	CUL5	mRNA	chr9:40557886-40568080|chr9:40569423-40572084	cullin 5 [Source:HGNC Symbol;Acc:HGNC:2556]	GO:0080008(Cul4-RING E3 ubiquitin ligase complex);GO:0031466(Cul5-RING ubiquitin ligase complex);GO:0031461(cullin-RING ubiquitin ligase complex);GO:0042787(protein ubiquitination involved in ubiquitin-dependent protein catabolic process);GO:0006974(cellular response to DNA damage stimulus);GO:0006511(ubiquitin-dependent protein catabolic process);GO:0031625(ubiquitin protein ligase binding);GO:0…	04120(Ubiquitin mediated proteolysis)
circRNA1008	137.333	192	125	192	186	210	402	388	341	270	238	170	10.8676	14.6408	9.43005	15.1073	15.6305	18.2337	34.8267	23.3306	27.5945	14.0115	11.9281	9.38666	chr9	44284359	44292473	-	4	circRNA	-	ENSSSCT00000032388	PPP2R1B	mRNA	chr9:44283513-44284358|chr9:44292473-44293354	protein phosphatase 2 scaffold subunit Abeta [Source:HGNC Symbol;Acc:HGNC:9303]	GO:0070062(extracellular exosome);GO:0045121(membrane raft);GO:2001241(positive regulation of extrinsic apoptotic signaling pathway in absence of ligand);GO:0060561(apoptotic process involved in morphogenesis)	03015(mRNA surveillance pathway);04350(TGF-beta signaling pathway);04390(Hippo signaling pathway);04071(Sphingolipid signaling pathway);04151(PI3K-Akt signaling pathway);04152(AMPK signaling pathway);04114(Oocyte meiosis);04530(Tight junction);04261(Adrenergic signaling in cardiomyocytes);04728(Dopaminergic synapse);04730(Long-term depression);05160(Hepatitis C);05142(Chagas disease (American try…
circRNA1009	33.5	44.5	91.5	45	63	63.5	111	137	149.5	75	24.5	41	4.49988	5.75998	11.7172	6.01029	8.98667	9.35896	16.3233	13.9834	20.5356	6.60664	2.0843	3.84276	chr9	50817859	50821523	-	2	circRNA	-	ENSSSCT00000028599	ARCN1	mRNA	chr9:50816031-50817858|chr9:50821523-50822571	archain 1 [Source:HGNC Symbol;Acc:HGNC:649]	GO:0030137(COPI-coated vesicle);GO:0030126(COPI vesicle coat);GO:0016020(membrane);GO:0005794(Golgi apparatus);GO:0005783(endoplasmic reticulum);GO:0048193(Golgi vesicle transport);GO:0043473(pigmentation);GO:0021691(cerebellar Purkinje cell layer maturation);GO:0015031(protein transport);GO:0008344(adult locomotory behavior);GO:0006890(retrograde vesicle-mediated transport, Golgi to ER);GO:00068…	NA
circRNA101	1.41667	1.41667	0	1.25	0.583333	3.5	158.683	169.95	142.6	100.15	60.1667	61.2833	0.206042	0.198546	0	0.180769	0.0900962	0.558539	25.2666	18.7821	21.2088	9.55217	5.54218	6.21919	chr4	39264389	39272615	+	3	circRNA	-	ENSSSCT00000006653	SNX31	mRNA	chr4:39249470-39264388|chr4:39272615-39276106	sorting nexin 31 [Source:HGNC Symbol;Acc:HGNC:28605]	GO:0043234(protein complex);GO:0005769(early endosome);GO:1990126(retrograde transport, endosome to plasma membrane);GO:0006886(intracellular protein transport);GO:0035091(phosphatidylinositol binding)	NA
circRNA1010	64	105	132	59	71	83	20	54	35	0	0	30	9.88788	15.6321	19.4421	9.06362	11.6489	14.0702	3.38283	6.33946	5.52968	0	0	3.23406	chr9	65398517	65404164	+	2	circRNA	-	ENSSSCT00000016622	NTM	mRNA	chr9:65396183-65398516|chr9:65404164-65418763	neurotrimin [Source:HGNC Symbol;Acc:HGNC:17941]	NA	NA
circRNA1011	20.8333	63.5	74.8333	59.1667	50.9667	74.1667	72	74.9	76.5	83.3333	27.6667	29	2.31239	6.79174	7.9185	6.52989	6.00745	9.03252	8.74908	6.31713	8.68306	6.06575	1.9449	2.24597	chr9	73323019	73336315	+	4	circRNA	-	ENSSSCT00000017041	ENSSSCG00000015645	mRNA	chr9:73315654-73323018|chr9:73336315-73347373	NA	GO:0045335(phagocytic vesicle);GO:0045211(postsynaptic membrane);GO:0014069(postsynaptic density);GO:0005886(plasma membrane);GO:0005829(cytosol);GO:0005743(mitochondrial inner membrane);GO:0005737(cytoplasm);GO:0060996(dendritic spine development);GO:0048812(neuron projection morphogenesis);GO:0046847(filopodium assembly);GO:0043547(positive regulation of GTPase activity);GO:0030336(negative reg…	04360(Axon guidance)
circRNA1012	12	36	26	10	10	15	8	22	21	65	13	16	2.4451	7.06843	5.0505	2.02601	2.1638	3.35355	1.78457	3.40623	4.37566	8.68545	1.67763	2.27478	chr9	78689139	78691918	+	2	circRNA	-	ENSSSCT00000016683	AKAP9	mRNA	chr9:78686596-78689138|chr9:78691918-78693458	A-kinase anchor protein 9 [Source:RefSeq peptide;Acc:NP_001240753]	GO:0007165(signal transduction);GO:0032947(protein complex scaffold);GO:0003677(DNA binding)	NA
circRNA1013	108	86.5	113	52	90	101.5	399	919	610.5	327.5	319.5	165.5	4.60124	3.55117	4.5896	2.20283	4.07188	4.74476	18.6102	29.751	26.5978	9.15009	8.62102	4.91985	chr9	78799545	78812309	-	7	circRNA	-	ENSSSCT00000016684	CYP51A1	mRNA	chr9:78798715-78799544|chr9:78812309-78814341	cytochrome P450 family 51 subfamily A member 1 [Source:HGNC Symbol;Acc:HGNC:2649]	GO:0043231(intracellular membrane-bounded organelle);GO:0031090(organelle membrane);GO:0016021(integral component of membrane);GO:0016020(membrane);GO:0005886(plasma membrane);GO:0005789(endoplasmic reticulum membrane);GO:0005783(endoplasmic reticulum);GO:0070988(demethylation);GO:0055114(oxidation-reduction process);GO:0033488(cholesterol biosynthetic process via 24,25-dihydrolanosterol);GO:0016…	00100(Steroid biosynthesis)
circRNA1014	9	0	5	0	0	0	7	0	11	0	2	6	1.67226	0	0.885677	0	0	0	1.42392	0	2.09007	0	0.235357	0.777884	chr9	100449434	100451791	-	2	circRNA	-	ENSSSCT00000016758	RAPGEF5	mRNA	chr9:100448233-100449433|chr9:100451791-100477905	Rap guanine nucleotide exchange factor 5 [Source:HGNC Symbol;Acc:HGNC:16862]	GO:0016604(nuclear body);GO:0005654(nucleoplasm);GO:0043547(positive regulation of GTPase activity);GO:0035556(intracellular signal transduction);GO:0007264(small GTPase mediated signal transduction);GO:0005085(guanyl-nucleotide exchange factor activity)	04014(Ras signaling pathway);04015(Rap1 signaling pathway)
circRNA1015	0	0	1	3	16	0	6	22	17	0	0	0	0	0	0.269864	0.844398	4.80974	0	1.85942	4.73214	4.92105	0	0	0	chr9	139975487	139975635	-	1	circRNA	-	ENSSSCT00000016969	TPR	mRNA	chr9:139974444-139975486|chr9:139975635-139975714	translocated promoter region, nuclear basket protein [Source:HGNC Symbol;Acc:HGNC:12017]	GO:0072686(mitotic spindle);GO:0044615(nuclear pore nuclear basket);GO:0042405(nuclear inclusion body);GO:0034399(nuclear periphery);GO:0031965(nuclear membrane);GO:0019898(extrinsic component of membrane);GO:0005868(cytoplasmic dynein complex);GO:0005737(cytoplasm);GO:0005643(nuclear pore);GO:0005635(nuclear envelope);GO:0005634(nucleus);GO:0000776(kinetochore);GO:1901673(regulation of mitotic s…	03013(RNA transport);05200(Pathways in cancer);05216(Thyroid cancer)
circRNA1016	52.3247	50.51	56.0992	31.3016	39.3462	68.2476	31.6962	39.0873	34.5732	12.0051	13.9141	28.4747	2.8367	2.63869	2.8994	1.68733	2.26522	4.05968	1.88123	1.61019	1.9167	0.426809	0.477749	1.07713	chr8	32724591	32737837	-	7	circRNA	-	ENSSSCT00000029818	PDS5A	mRNA	chr8:32717396-32724590|chr8:32737837-32743686	PDS5 cohesin associated factor A [Source:HGNC Symbol;Acc:HGNC:29088]	GO:0005886(plasma membrane);GO:0005654(nucleoplasm);GO:0005634(nucleus);GO:0000785(chromatin);GO:0008156(negative regulation of DNA replication);GO:0007064(mitotic sister chromatid cohesion);GO:0006281(DNA repair)	NA
circRNA1017	6.83333	31.5	31.5	11.3333	16	23.8333	4.33333	11	7	0	0	0	1.13471	5.04043	4.98664	1.87127	2.82146	4.34245	0.787774	1.38797	1.18866	0	0	0	chr8	39572078	39573240	-	2	circRNA	-	ENSSSCT00000009643	CORIN	mRNA	chr8:39562193-39572077|chr8:39573240-39577837	corin, serine peptidase [Source:HGNC Symbol;Acc:HGNC:19012]	GO:0016604(nuclear body);GO:0016021(integral component of membrane);GO:0016020(membrane);GO:0015629(actin cytoskeleton);GO:0009986(cell surface);GO:0005886(plasma membrane);GO:0035813(regulation of renal sodium excretion);GO:0016486(peptide hormone processing);GO:0008217(regulation of blood pressure);GO:0007565(female pregnancy);GO:0006508(proteolysis);GO:0003050(regulation of systemic arterial b…	NA
circRNA1018	3.5	17.25	9.75	4.25	1.5	13.75	3.5	4.5	4.75	14.5	0	0	0.548784	2.60632	1.45742	0.662596	0.249762	2.36556	0.600799	0.536144	0.761616	1.49096	0	0	chr8	40509466	40510800	-	2	circRNA	-	ENSSSCT00000009659	ENSSSCG00000008826	mRNA	chr8:40508311-40509465|chr8:40510800-40511655	NA	GO:0030427(site of polarized growth);GO:0005938(cell cortex);GO:0090527(actin filament reorganization);GO:0031175(neuron projection development);GO:0000902(cell morphogenesis)	NA
circRNA1019	285	345.083	428.75	252.417	238.817	336.917	131.167	215	146.083	127.833	63.3333	57.8333	42.3265	49.3852	60.704	37.2745	37.6647	54.9019	21.3264	24.2628	22.1859	12.4502	5.95713	5.99307	chr8	40509466	40645857	-	7	circRNA	-	ENSSSCT00000031947	ENSSSCG00000008826	mRNA	chr8:40508311-40509465|chr8:40645857-40646712	NA	GO:0030427(site of polarized growth);GO:0005938(cell cortex);GO:0090527(actin filament reorganization);GO:0031175(neuron projection development);GO:0000902(cell morphogenesis)	NA
circRNA102	9.5	0	14	2.5	11	17.5	5.5	25.5	6.5	38	32.5	24	1.20328	0	1.6905	0.314853	1.47957	2.43208	0.762662	2.45424	0.841907	3.15638	2.60713	2.12108	chr4	41114627	41115480	+	2	circRNA	-	ENSSSCT00000006665	STK3	mRNA	chr4:41090991-41114626|chr4:41115480-41190968	serine/threonine kinase 3 [Source:HGNC Symbol;Acc:HGNC:11406]	GO:0043234(protein complex);GO:0005737(cytoplasm);GO:1902043(positive regulation of extrinsic apoptotic signaling pathway via death domain receptors);GO:0097284(hepatocyte apoptotic process);GO:0090090(negative regulation of canonical Wnt signaling pathway);GO:0060800(regulation of cell differentiation involved in embryonic placenta development);GO:0060706(cell differentiation involved in embryon…	NA
circRNA1020	61.6667	84.6667	93	50.3333	46.6667	56.3333	15	21	18.3333	10	27.3333	5	5.29731	7.00845	7.6161	4.29919	4.25709	5.30967	1.41066	1.37075	1.61048	0.563336	1.48708	0.299694	chr8	40587742	40601513	-	4	circRNA	-	ENSSSCT00000009661	ENSSSCG00000008827	mRNA	chr8:40577131-40587741|chr8:40601513-40724888	NA	GO:0030427(site of polarized growth);GO:0005938(cell cortex);GO:0090527(actin filament reorganization);GO:0031175(neuron projection development);GO:0000902(cell morphogenesis)	NA
circRNA1021	0	0	1	0	0	0	15	6	2	0	0	0	0	0	0.111384	0	0	0	1.91866	0.532679	0.238956	0	0	0	chr8	76268268	76274203	-	2	circRNA	-	ENSSSCT00000009840	CCDC158	mRNA	chr8:76263753-76268267|chr8:76274203-76282972	coiled-coil domain containing 158 [Source:HGNC Symbol;Acc:HGNC:26374]	NA	NA
circRNA1022	14.5	22.5	42.3333	4.83333	18.5	16.8333	12.25	33.5	17	94.5	102	42.5	2.05229	3.06872	5.71212	0.68021	2.78063	2.61419	1.89816	3.60288	2.46052	8.77132	9.14338	4.19722	chr8	88019043	88023699	+	2	circRNA	-	ENSSSCT00000009897	ZNF827	mRNA	chr8:87993701-88019042|chr8:88023699-88039830	zinc finger protein 827 [Source:HGNC Symbol;Acc:HGNC:27193]	GO:0046872(metal ion binding);GO:0003676(nucleic acid binding)	NA
circRNA1023	7.91667	23.1667	14	42	17	8.5	357.5	444	327.167	638.667	173	143	1.11303	3.13858	1.87646	5.87138	2.53814	1.31124	55.026	47.4333	47.0373	58.8847	15.4045	14.0283	chr8	117532444	117557776	-	3	circRNA	-	ENSSSCT00000009992	ANK2	mRNA	chr8:117498361-117532443|chr8:117557776-117670997	ankyrin 2 [Source:HGNC Symbol;Acc:HGNC:493]	GO:0043034(costamere);GO:0016323(basolateral plasma membrane);GO:0005622(intracellular);GO:0098910(regulation of atrial cardiac muscle cell action potential);GO:0098907(regulation of SA node cell action potential);GO:0086091(regulation of heart rate by cardiac conduction);GO:0086070(SA node cell to atrial cardiac muscle cell communication);GO:0086014(atrial cardiac muscle cell action potential);G…	05205(Proteoglycans in cancer)
circRNA1024	8.33333	2.66667	2.66667	0	10.3333	9.66667	10	24	10.3333	46.6667	66.5	26.3333	0.920114	0.283724	0.280696	0	1.21162	1.17111	1.20879	2.01358	1.16673	3.37903	4.6503	2.02877	chr8	120767276	120768132	-	3	circRNA	-	ENSSSCT00000010010	SEC24B	mRNA	chr8:120764913-120767275|chr8:120768132-120770162	SEC24 homolog B, COPII coat complex component [Source:HGNC Symbol;Acc:HGNC:10704]	GO:0030127(COPII vesicle coat);GO:1901301(regulation of cargo loading into COPII-coated vesicle);GO:0090178(regulation of establishment of planar polarity involved in neural tube closure);GO:0072358(cardiovascular system development);GO:0061156(pulmonary artery morphogenesis);GO:0060982(coronary artery morphogenesis);GO:0060463(lung lobe morphogenesis);GO:0060425(lung morphogenesis);GO:0060088(au…	NA
circRNA1025	238	215	178	82	120.333	156	150	217	219.5	308	58	105	19.9174	17.338	14.2011	6.82332	10.6941	14.3244	13.7428	13.7991	18.7845	16.9032	3.07412	6.13124	chr8	122227452	122242394	-	4	circRNA	-	ENSSSCT00000010020	HADH	mRNA	chr8:122221778-122227451|chr8:122242394-122265611	Hydroxyacyl-coenzyme A dehydrogenase, mitochondrial [Source:UniProtKB/Swiss-Prot;Acc:P00348]	GO:0005759(mitochondrial matrix);GO:0005743(mitochondrial inner membrane);GO:0005739(mitochondrion);GO:0005737(cytoplasm);GO:0005654(nucleoplasm);GO:0055114(oxidation-reduction process);GO:0006635(fatty acid beta-oxidation);GO:0006631(fatty acid metabolic process);GO:0006629(lipid metabolic process);GO:0070403(NAD+ binding);GO:0016491(oxidoreductase activity);GO:0003857(3-hydroxyacyl-CoA dehydrog…	01212(Fatty acid metabolism);00650(Butanoate metabolism);00062(Fatty acid elongation);00071(Fatty acid degradation);00280(Valine, leucine and isoleucine degradation);00310(Lysine degradation);00380(Tryptophan metabolism)
circRNA1026	43	66	86	56.3333	41	77	14	25	21	5	0	25	3.60567	5.33294	6.87483	4.69688	3.65093	7.08445	1.28521	1.59292	1.80072	0.274948	0	1.46272	chr8	127091752	127097642	+	4	circRNA	-	ENSSSCT00000010034	SLC9B1	mRNA	chr8:127087433-127091751|chr8:127097642-127103230	solute carrier family 9 member B1 [Source:HGNC Symbol;Acc:HGNC:24244]	GO:0031966(mitochondrial membrane);GO:0016021(integral component of membrane);GO:0016020(membrane);GO:0005739(mitochondrion);GO:1902600(hydrogen ion transmembrane transport);GO:0055085(transmembrane transport);GO:0006814(sodium ion transport);GO:0006812(cation transport);GO:0015299(solute:proton antiporter activity)	NA
circRNA1027	38	19	29	9	33	58	1	14	15	0	37	0	4.27404	2.05927	3.10955	1.00652	3.94158	7.15781	0.123135	1.19652	1.72526	0	2.63568	0	chr8	144218585	144230263	-	4	circRNA	-	ENSSSCT00000010112	GPAT3	mRNA	chr8:144216910-144218584|chr8:144230263-144239389	glycerol-3-phosphate acyltransferase 3 [Source:HGNC Symbol;Acc:HGNC:28157]	GO:0016021(integral component of membrane);GO:0016020(membrane);GO:0005789(endoplasmic reticulum membrane);GO:0005783(endoplasmic reticulum);GO:0032006(regulation of TOR signaling);GO:0019432(triglyceride biosynthetic process);GO:0008152(metabolic process);GO:0016746(transferase activity, transferring acyl groups);GO:0004366(glycerol-3-phosphate O-acyltransferase activity)	00561(Glycerolipid metabolism);00564(Glycerophospholipid metabolism)
circRNA1028	35	15.5	39	29.5	28	18.5	33.5	57	27	26.5	78	26.5	4.34185	1.85286	4.6123	3.63878	3.68865	2.51812	4.54966	5.37301	3.42515	2.15584	6.12828	2.2938	chr8	146890664	146892955	+	4	circRNA	-	ENSSSCT00000010136	ANTXR2	mRNA	chr8:146875559-146890663|chr8:146892955-146911443	anthrax toxin receptor 2 [Source:HGNC Symbol;Acc:HGNC:21732]	GO:0016021(integral component of membrane);GO:0016020(membrane);GO:0009986(cell surface);GO:0009897(external side of plasma membrane);GO:1901998(toxin transport);GO:0022414(reproductive process);GO:0046872(metal ion binding);GO:0004872(receptor activity)	NA
circRNA1029	6.5	9.5	11	4.5	7	10.5	8.5	4	5.5	0	0	0	0.993323	1.39896	1.60256	0.683779	1.136	1.76061	1.42208	0.464486	0.859505	0	0	0	chr13	15502088	15502750	-	2	circRNA	-	ENSSSCT00000012285	SLC4A7	mRNA	chr13:15499281-15502087|chr13:15502750-15505191	solute carrier family 4 member 7 [Source:HGNC Symbol;Acc:HGNC:11033]	GO:0016021(integral component of membrane);GO:0016020(membrane);GO:0005887(integral component of plasma membrane);GO:0098656(anion transmembrane transport);GO:0060117(auditory receptor cell development);GO:0051453(regulation of intracellular pH);GO:0015701(bicarbonate transport);GO:0015698(inorganic anion transport);GO:0006820(anion transport);GO:0006811(ion transport);GO:0006810(transport);GO:00…	NA
circRNA103	486.683	504.267	484.467	275.9	286.85	401.067	260.883	393.033	294.467	449.667	351.933	244.817	52.3656	52.2835	49.6946	29.5174	32.7761	47.3494	30.7308	32.134	32.4	31.7288	23.9827	18.3799	chr4	42001869	42012095	-	4	circRNA	-	ENSSSCT00000006674	LAPTM4B	mRNA	chr4:41978419-42001868|chr4:42012095-42030159	lysosomal protein transmembrane 4 beta [Source:HGNC Symbol;Acc:HGNC:13646]	GO:0016021(integral component of membrane);GO:0016020(membrane)	NA
circRNA1030	149	148	106	109	135	208	228	205	162	86	142	280	16.4516	15.7467	11.1577	11.9667	15.8292	25.199	27.5604	17.1993	18.2914	6.22708	9.92997	21.5717	chr13	33772632	33774957	-	3	circRNA	-	ENSSSCT00000012417	ENSSSCG00000011340	mRNA	chr13:33764519-33772631|chr13:33774957-33777359	NA	GO:0016514(SWI/SNF complex);GO:0043044(ATP-dependent chromatin remodeling);GO:0003677(DNA binding)	NA
circRNA1031	218	228.5	212.667	173.917	147.75	162.5	352.667	425.083	267.25	311.167	255.333	306.5	6.16274	6.22455	5.73142	4.8886	4.43554	5.04044	10.9146	9.13118	7.7258	5.76864	4.57153	6.04576	chr13	34916547	34926774	-	4	circRNA	-	ENSSSCT00000012451	QRICH1	mRNA	chr13:34910378-34916546|chr13:34926774-34942343	glutamine rich 1 [Source:HGNC Symbol;Acc:HGNC:24713]	GO:0005737(cytoplasm);GO:0005654(nucleoplasm);GO:0022604(regulation of cell morphogenesis);GO:0007275(multicellular organism development);GO:0007010(cytoskeleton organization);GO:0006357(regulation of transcription from RNA polymerase II promoter);GO:0003677(DNA binding);GO:0000981(RNA polymerase II transcription factor activity, sequence-specific DNA binding)	NA
circRNA1032	419	639	932	311	481	642	907	977	824	349	389	671	45.4308	66.764	96.338	33.5292	55.3839	76.3781	107.664	80.4945	91.3634	24.8156	26.713	50.7647	chr13	43344526	43352176	-	4	circRNA	-	ENSSSCT00000012547	ARF4	mRNA	chr13:43342723-43344525|chr13:43352176-43361463	ADP ribosylation factor 4 [Source:HGNC Symbol;Acc:HGNC:655]	GO:0070062(extracellular exosome);GO:0043197(dendritic spine);GO:0032587(ruffle membrane);GO:0031012(extracellular matrix);GO:0016020(membrane);GO:0005886(plasma membrane);GO:0005829(cytosol);GO:0005794(Golgi apparatus);GO:0005737(cytoplasm);GO:0005622(intracellular);GO:2000377(regulation of reactive oxygen species metabolic process);GO:0061512(protein localization to cilium);GO:0060996(dendritic…	NA
circRNA1033	19	11	19	19	25	11	7	30	47	251	200	192	4.88648	2.72609	4.65845	4.85872	6.82785	3.10408	1.97091	5.86272	12.3609	42.333	32.5769	34.4546	chr13	43392088	43392355	-	2	circRNA	-	ENSSSCT00000012549	DENND6A	mRNA	chr13:43391194-43392087|chr13:43392355-43393873	DENN domain containing 6A [Source:HGNC Symbol;Acc:HGNC:26635]	GO:0055037(recycling endosome);GO:0043231(intracellular membrane-bounded organelle);GO:0005737(cytoplasm);GO:2000049(positive regulation of cell-cell adhesion mediated by cadherin);GO:0043547(positive regulation of GTPase activity);GO:0017112(Rab guanyl-nucleotide exchange factor activity)	NA
circRNA1034	29	33	42	32	38	39	20	105.5	48.5	8.5	54	41.5	3.21885	3.52956	4.44424	3.53166	4.47907	4.74968	2.4303	8.89796	5.50495	0.618706	3.79606	3.21406	chr13	43420849	43426130	-	4	circRNA	-	ENSSSCT00000012549	DENND6A	mRNA	chr13:43419245-43420848|chr13:43426130-43431187	DENN domain containing 6A [Source:HGNC Symbol;Acc:HGNC:26635]	GO:0055037(recycling endosome);GO:0043231(intracellular membrane-bounded organelle);GO:0005737(cytoplasm);GO:2000049(positive regulation of cell-cell adhesion mediated by cadherin);GO:0043547(positive regulation of GTPase activity);GO:0017112(Rab guanyl-nucleotide exchange factor activity)	NA
circRNA1035	7	5	14	27	16	29.5	37	55	45	43	17	17	2.12407	1.462	4.0499	8.14632	5.15576	9.82179	12.2914	12.6815	13.9634	8.55663	3.26706	3.59934	chr13	52644089	52645257	+	2	circRNA	-	ENSSSCT00000012582	SLC25A26	mRNA	chr13:52637146-52644088|chr13:52645257-52650109	solute carrier family 25 member 26 [Source:HGNC Symbol;Acc:HGNC:20661]	GO:0016021(integral component of membrane);GO:0016020(membrane);GO:0005743(mitochondrial inner membrane);GO:0005739(mitochondrion);GO:1901962(S-adenosyl-L-methionine transmembrane transport);GO:0055085(transmembrane transport);GO:0006839(mitochondrial transport);GO:0006810(transport);GO:0000095(S-adenosyl-L-methionine transmembrane transporter activity)	NA
circRNA1036	43	17	47	12	21	27	20	61	16	18	0	40	5.75763	2.19346	5.99955	1.59766	2.98605	3.96677	2.93179	6.20641	2.19081	1.58056	0	3.73713	chr13	77761973	77764468	+	2	circRNA	-	ENSSSCT00000012699	XPC	mRNA	chr13:77746688-77761972|chr13:77764468-77767303	XPC complex subunit, DNA damage recognition and repair factor [Source:HGNC Symbol;Acc:HGNC:12816]	GO:0071942(XPC complex);GO:0070062(extracellular exosome);GO:0043231(intracellular membrane-bounded organelle);GO:0005886(plasma membrane);GO:0005739(mitochondrion);GO:0005737(cytoplasm);GO:0005730(nucleolus);GO:0005634(nucleus);GO:0000111(nucleotide-excision repair factor 2 complex);GO:1901990(regulation of mitotic cell cycle phase transition);GO:0070914(UV-damage excision repair);GO:0031573(int…	03420(Nucleotide excision repair)
circRNA1037	13.5	3	17.5	8.5	13.5	8.5	18	34.5	14.5	0	9.5	7	1.44153	0.308685	1.78144	0.902473	1.53082	0.995876	2.10421	2.79926	1.58331	0	0.642465	0.521543	chr13	81194156	81195086	+	3	circRNA	-	ENSSSCT00000012725	DNAJC13	mRNA	chr13:81190834-81194155|chr13:81195086-81199596	DnaJ heat shock protein family (Hsp40) member C13 [Source:HGNC Symbol;Acc:HGNC:30343]	GO:0071203(WASH complex);GO:0070062(extracellular exosome);GO:0043231(intracellular membrane-bounded organelle);GO:0031901(early endosome membrane);GO:0016020(membrane);GO:0010008(endosome membrane);GO:0005829(cytosol);GO:0005765(lysosomal membrane);GO:2000641(regulation of early endosome to late endosome transport);GO:1902954(regulation of early endosome to recycling endosome transport);GO:00070…	NA
circRNA1038	2	6	13	1	2	24	29	20	13	0	35	0	0.297028	0.858665	1.84059	0.147671	0.315427	3.9109	4.71512	2.25701	1.97433	0	3.2921	0	chr13	86954020	86954463	-	2	circRNA	-	ENSSSCT00000023265	CEP70	mRNA	chr13:86952927-86954019|chr13:86954463-86954634	centrosomal protein 70 [Source:HGNC Symbol;Acc:HGNC:29972]	GO:0005813(centrosome);GO:0042802(identical protein binding)	NA
circRNA1039	19	4	21	3	10	8	42	68	25	66	110	3	3.19276	0.647705	3.36416	0.501256	1.78449	1.47503	7.72661	8.68274	4.29597	7.2731	11.7069	0.351752	chr13	102346239	102348459	-	2	circRNA	-	ENSSSCT00000027576	DHX36	mRNA	chr13:102345263-102346238|chr13:102348459-102350601	DEAH-box helicase 36 [Source:HGNC Symbol;Acc:HGNC:14410]	GO:0008026(ATP-dependent helicase activity);GO:0005524(ATP binding);GO:0003676(nucleic acid binding);GO:0070062(extracellular exosome);GO:0016021(integral component of membrane);GO:0016020(membrane);GO:0005829(cytosol);GO:0005737(cytoplasm);GO:0005634(nucleus);GO:0090669(telomerase RNA stabilization);GO:0045944(positive regulation of transcription from RNA polymerase II promoter);GO:0043330(respo…	NA
circRNA104	39.3	33.45	36.25	20.6667	34.75	18.6667	32.5333	34.8333	33.85	34.5	21.4167	17.8167	3.93728	3.22927	3.46224	2.05874	3.69709	2.05196	3.56829	2.65176	3.46794	2.26666	1.35892	1.24547	chr4	43494812	43509860	-	6	circRNA	-	ENSSSCT00000006680	PTDSS1	mRNA	chr4:43482731-43494811|chr4:43509860-43514474	phosphatidylserine synthase 1 [Source:HGNC Symbol;Acc:HGNC:9587]	GO:0016021(integral component of membrane);GO:0016020(membrane);GO:0005789(endoplasmic reticulum membrane);GO:0006659(phosphatidylserine biosynthetic process)	NA
circRNA1040	9.5	13	15	3.5	10	19	29	13	14.5	40.5	55	28.5	0.861701	1.13627	1.29709	0.315666	0.963241	1.89097	2.87977	0.896008	1.34496	2.40908	3.1596	1.80377	chr13	126893678	126896290	+	3	circRNA	-	ENSSSCT00000012876	ENSSSCG00000011765	mRNA	chr13:126889519-126893677|chr13:126896290-126910941	NA	GO:0016579(protein deubiquitination);GO:0006511(ubiquitin-dependent protein catabolic process);GO:0036459(thiol-dependent ubiquitinyl hydrolase activity)	NA
circRNA1041	96	111	63	103	90	93	92	83	102.5	236	0	84	5.15807	5.74704	3.22702	5.50275	5.13524	5.48273	5.41167	3.38868	5.63182	8.31556	0	3.14919	chr13	132975613	132984562	+	8	circRNA	-	ENSSSCT00000024072	SENP2	mRNA	chr13:132970765-132975612|chr13:132984562-132987061	SUMO1/sentrin/SMT3 specific peptidase 2 [Source:HGNC Symbol;Acc:HGNC:23116]	GO:0006508(proteolysis);GO:0008234(cysteine-type peptidase activity);GO:0031410(cytoplasmic vesicle);GO:0016605(PML body);GO:0016604(nuclear body);GO:0005829(cytosol);GO:0005737(cytoplasm);GO:0005643(nuclear pore);GO:0005634(nucleus);GO:2000045(regulation of G1/S transition of mitotic cell cycle);GO:1901797(negative regulation of signal transduction by p53 class mediator);GO:0060712(spongiotropho…	03013(RNA transport);04310(Wnt signaling pathway)
circRNA1042	81	85	81.6667	38.3333	61.5	79.6667	40.6667	83	64.8333	30	75.5	37.5	9.13481	9.23715	8.7802	4.2985	7.36532	9.858	5.02089	7.11259	7.4769	2.2187	5.3926	2.95086	chr13	190906188	190926244	+	3	circRNA	-	ENSSSCT00000022689	USP25	mRNA	chr13:190894152-190906187|chr13:190926244-190937607	ubiquitin specific peptidase 25 [Source:HGNC Symbol;Acc:HGNC:12624]	GO:0005829(cytosol);GO:0005783(endoplasmic reticulum);GO:1904293(negative regulation of ERAD pathway);GO:0071108(protein K48-linked deubiquitination);GO:0070536(protein K63-linked deubiquitination);GO:0016579(protein deubiquitination);GO:0006511(ubiquitin-dependent protein catabolic process);GO:0051117(ATPase binding);GO:0036459(thiol-dependent ubiquitinyl hydrolase activity);GO:0032183(SUMO bind…	NA
circRNA1043	399.5	354.5	288.5	209.5	289.833	216.5	325	456.5	279.5	346.5	388.5	247.5	28.2246	24.1342	19.4313	14.7171	21.7451	16.7829	25.1375	24.5069	20.1931	16.0538	17.3836	12.2009	chr13	199361578	199385121	-	5	circRNA	-	ENSSSCT00000013153	APP	mRNA	chr13:199323022-199361577|chr13:199385121-199436868	amyloid beta precursor protein [Source:HGNC Symbol;Acc:HGNC:620]	GO:0070062(extracellular exosome);GO:0051233(spindle midzone);GO:0048471(perinuclear region of cytoplasm);GO:0045202(synapse);GO:0045177(apical part of cell);GO:0045121(membrane raft);GO:0043235(receptor complex);GO:0043198(dendritic shaft);GO:0043197(dendritic spine);GO:0043005(neuron projection);GO:0035253(ciliary rootlet);GO:0031594(neuromuscular junction);GO:0031410(cytoplasmic vesicle);GO:00…	04726(Serotonergic synapse);05010(Alzheimer's disease)
circRNA1044	0	1.33333	3	1.33333	3.33333	5.33333	9	13.6667	13.3333	0	2.66667	0	0	0.181242	0.403442	0.187017	0.499339	0.825489	1.3899	1.46492	1.92337	0	0.238243	0	chr13	205198842	205199237	-	2	circRNA	-	ENSSSCT00000025130	TIAM1	mRNA	chr13:205191815-205198841|chr13:205199237-205203833	T-cell lymphoma invasion and metastasis 1 [Source:HGNC Symbol;Acc:HGNC:11805]	GO:0044291(cell-cell contact zone);GO:0031234(extrinsic component of cytoplasmic side of plasma membrane);GO:0005911(cell-cell junction);GO:0005886(plasma membrane);GO:0005829(cytosol);GO:0090630(activation of GTPase activity);GO:0035556(intracellular signal transduction);GO:0035023(regulation of Rho protein signal transduction);GO:0032092(positive regulation of protein binding);GO:0030335(positi…	04014(Ras signaling pathway);04015(Rap1 signaling pathway);04024(cAMP signaling pathway);04810(Regulation of actin cytoskeleton);04062(Chemokine signaling pathway);05205(Proteoglycans in cancer)
circRNA1045	79	77.5	134	51.5	43	79.25	147	224	109.5	282.5	94.5	137.5	8.3931	7.93418	13.5721	5.44038	4.85139	9.23831	17.0978	18.0834	11.8965	19.6824	6.35864	10.193	chr12	2288179	2290061	+	3	circRNA	-	ENSSSCT00000018679	EIF4A3	mRNA	chr12:2273701-2288178|chr12:2290061-2292336	eukaryotic initiation factor 4A-III [Source:RefSeq peptide;Acc:NP_001093663]	GO:0071013(catalytic step 2 spliceosome);GO:0035145(exon-exon junction complex);GO:0016020(membrane);GO:0005737(cytoplasm);GO:0005654(nucleoplasm);GO:0048701(embryonic cranial skeleton morphogenesis);GO:0045727(positive regulation of translation);GO:0017148(negative regulation of translation);GO:0000184(nuclear-transcribed mRNA catabolic process, nonsense-mediated decay);GO:0016787(hydrolase acti…	03040(Spliceosome);03013(RNA transport);03015(mRNA surveillance pathway)
circRNA1046	2	9	2	24	13	53	103	38	95	42	39	28	0.242402	1.05112	0.231091	2.89231	1.67322	7.04823	13.6669	3.49966	11.7744	3.33825	2.9937	2.36793	chr12	5193200	5194267	+	2	circRNA	-	ENSSSCT00000018711	RNF157	mRNA	chr12:5189874-5193199|chr12:5194267-5196690	ring finger protein 157 [Source:HGNC Symbol;Acc:HGNC:29402]	GO:0008270(zinc ion binding)	NA
circRNA1047	25	23	26.5	44	72.5	82.5	94.5	115.5	98.5	94.5	22	47	3.77939	3.35054	3.81921	6.61395	11.6392	13.6846	15.6402	13.2678	15.2274	9.36865	2.1064	4.95773	chr12	5283986	5285177	+	2	circRNA	-	ENSSSCT00000018716	SRP68	mRNA	chr12:5278264-5283985|chr12:5285177-5285646	signal recognition particle 68 [Source:HGNC Symbol;Acc:HGNC:11302]	GO:0030529(intracellular ribonucleoprotein complex);GO:0005925(focal adhesion);GO:0005829(cytosol);GO:0005786(signal recognition particle, endoplasmic reticulum targeting);GO:0005783(endoplasmic reticulum);GO:0005737(cytoplasm);GO:0045047(protein targeting to ER);GO:0042493(response to drug);GO:0006614(SRP-dependent cotranslational protein targeting to membrane);GO:0030942(endoplasmic reticulum s…	NA
circRNA1048	20	4	8	4	3	2	16	18	28	27	22	33	3.96038	0.763258	1.51023	0.787577	0.630855	0.434544	3.4686	2.70841	5.66987	3.50617	2.75909	4.55957	chr12	14584775	14585617	+	2	circRNA	-	ENSSSCT00000018805	NOL11	mRNA	chr12:14582600-14584774|chr12:14585617-14586776	nucleolar protein 11 [Source:HGNC Symbol;Acc:HGNC:24557]	GO:0034455(t-UTP complex);GO:0005730(nucleolus);GO:0005634(nucleus);GO:1901838(positive regulation of transcription of nuclear large rRNA transcript from RNA polymerase I promoter);GO:0030490(maturation of SSU-rRNA);GO:0003723(RNA binding)	NA
circRNA1049	114.583	134.8	221.317	98.9833	124.667	112	96.6	133.367	117.8	56	60.3333	35.9833	11.7589	13.3303	21.6523	10.1003	13.5861	12.6113	10.853	10.3998	12.3623	3.76873	3.92138	2.57661	chr12	17069503	17085916	+	3	circRNA	-	ENSSSCT00000018846	KANSL1	mRNA	chr12:17059237-17069502|chr12:17085916-17103288	KAT8 regulatory NSL complex subunit 1 [Source:HGNC Symbol;Acc:HGNC:24565]	GO:0071339(MLL1 complex);GO:0005654(nucleoplasm);GO:0005634(nucleus);GO:0000123(histone acetyltransferase complex);GO:0043984(histone H4-K16 acetylation);GO:0043982(histone H4-K8 acetylation);GO:0043981(histone H4-K5 acetylation);GO:0046972(histone acetyltransferase activity (H4-K16 specific));GO:0043996(histone acetyltransferase activity (H4-K8 specific));GO:0043995(histone acetyltransferase act…	NA
circRNA105	17.5	4.5	16	5.5	3.5	4	3.5	15	18.3333	0	2	8	2.17093	0.537928	1.89222	0.678416	0.461081	0.544458	0.475338	1.41395	2.32572	0	0.157135	0.692469	chr4	55349876	55350215	-	1	circRNA	-	ENSSSCT00000006730	WWP1	mRNA	chr4:55339246-55349875|chr4:55350215-55364471	WW domain containing E3 ubiquitin protein ligase 1 [Source:HGNC Symbol;Acc:HGNC:17004]	GO:0070062(extracellular exosome);GO:0045892(negative regulation of transcription, DNA-templated);GO:0043161(proteasome-mediated ubiquitin-dependent protein catabolic process);GO:0016567(protein ubiquitination);GO:0061630(ubiquitin protein ligase activity);GO:0016740(transferase activity);GO:0004842(ubiquitin-protein transferase activity)	04120(Ubiquitin mediated proteolysis);04144(Endocytosis)
circRNA1050	471.083	565.7	739.483	278.983	393.667	485.5	348.6	363.867	349.8	96	161.667	102.983	34.0812	39.4374	51.0025	20.0688	30.2446	38.5393	27.6104	20.003	25.8789	4.55462	7.40756	5.19862	chr12	17069503	17103460	+	4	circRNA	-	ENSSSCT00000018846	KANSL1	mRNA	chr12:17059237-17069502|chr12:17103460-17112900	KAT8 regulatory NSL complex subunit 1 [Source:HGNC Symbol;Acc:HGNC:24565]	GO:0071339(MLL1 complex);GO:0005654(nucleoplasm);GO:0005634(nucleus);GO:0000123(histone acetyltransferase complex);GO:0043984(histone H4-K16 acetylation);GO:0043982(histone H4-K8 acetylation);GO:0043981(histone H4-K5 acetylation);GO:0046972(histone acetyltransferase activity (H4-K16 specific));GO:0043996(histone acetyltransferase activity (H4-K8 specific));GO:0043995(histone acetyltransferase act…	NA
circRNA1051	9	29.5	0.5	15	5.5	11.5	9.5	41.5	23	0	32	19.5	1.3135	4.14873	0.069567	2.17674	0.852418	1.84155	1.51789	4.60227	3.43261	0	2.95784	1.98576	chr12	20313406	20315863	-	2	circRNA	-	ENSSSCT00000018921	EZH1	mRNA	chr12:20312239-20313405|chr12:20315863-20316408	enhancer of zeste 1 polycomb repressive complex 2 subunit [Source:HGNC Symbol;Acc:HGNC:3526]	GO:0035098(ESC/E(Z) complex);GO:0005654(nucleoplasm);GO:0070734(histone H3-K27 methylation);GO:0018024(histone-lysine N-methyltransferase activity)	NA
circRNA1052	2	0	1	15	36	39	24	42	60	0	23	0	0.341522	0	0.162793	2.54687	6.5282	7.3072	4.48671	5.44972	10.4773	0	2.48745	0	chr12	22413919	22415518	+	2	circRNA	-	ENSSSCT00000019020	CDC6	mRNA	chr12:22413268-22413918|chr12:22415518-22416968	cell division cycle 6 [Source:HGNC Symbol;Acc:HGNC:1744]	GO:0051233(spindle midzone);GO:0005829(cytosol);GO:0005794(Golgi apparatus);GO:0005654(nucleoplasm);GO:0005634(nucleus);GO:0000922(spindle pole);GO:0051984(positive regulation of chromosome segregation);GO:0051301(cell division);GO:0032467(positive regulation of cytokinesis);GO:0030071(regulation of mitotic metaphase/anaphase transition);GO:0006270(DNA replication initiation);GO:0019900(kinase bi…	04110(Cell cycle)
circRNA1053	84	71.3333	13	27	31	54	104	102	71	473	116	202	14.3439	11.7378	2.1163	4.58437	5.6215	10.1177	19.4424	13.235	12.3981	52.968	12.5454	24.0682	chr12	23064328	23064891	-	2	circRNA	-	ENSSSCT00000033442	ENSSSCG00000017497	mRNA	chr12:23060806-23064327|chr12:23064891-23065535	NA	GO:0016021(integral component of membrane);GO:0016020(membrane);GO:0005622(intracellular);GO:0035556(intracellular signal transduction);GO:0023014(signal transduction by protein phosphorylation);GO:0018108(peptidyl-tyrosine phosphorylation);GO:0016310(phosphorylation);GO:0007169(transmembrane receptor protein tyrosine kinase signaling pathway);GO:0006468(protein phosphorylation);GO:0016740(transf…	04012(ErbB signaling pathway);04066(HIF-1 signaling pathway);04020(Calcium signaling pathway);04510(Focal adhesion);04520(Adherens junction);05200(Pathways in cancer);05230(Central carbon metabolism in cancer);05206(MicroRNAs in cancer);05205(Proteoglycans in cancer);05212(Pancreatic cancer);05219(Bladder cancer);05215(Prostate cancer);05213(Endometrial cancer);05223(Non-small cell lung cancer)
circRNA1054	510	643.583	495.6	396.583	407.25	531.25	192	315.483	277.95	84.3333	131	52.8333	42.178	51.2891	39.0744	32.6119	35.7667	48.2072	17.3838	19.8257	23.5067	4.57381	6.86158	3.04879	chr12	23729226	23742062	+	5	circRNA	-	ENSSSCT00000019067	NPEPPS	mRNA	chr12:23728553-23729225|chr12:23742062-23743638	aminopeptidase puromycin sensitive [Source:HGNC Symbol;Acc:HGNC:7900]	GO:0070062(extracellular exosome);GO:0005829(cytosol);GO:0005737(cytoplasm);GO:1903955(positive regulation of protein targeting to mitochondrion);GO:0071456(cellular response to hypoxia);GO:0043171(peptide catabolic process);GO:0006508(proteolysis);GO:0070006(metalloaminopeptidase activity);GO:0042277(peptide binding);GO:0008270(zinc ion binding);GO:0008237(metallopeptidase activity)	NA
circRNA1055	57	28	13	34	10	11	52	66	45	12	45	52	8.49522	4.02126	1.84709	5.03854	1.58271	1.79883	8.48458	7.47445	6.85837	1.17285	4.24765	5.40762	chr12	25545037	25547140	-	2	circRNA	-	ENSSSCT00000019103	ENSSSCG00000017549	mRNA	chr12:25541764-25545036|chr12:25547140-25549003	NA	GO:0016020(membrane)	NA
circRNA1056	71.9667	78.2429	85.6155	67.7333	182.538	44.3048	140.552	286.371	107.933	71.3333	32.0905	20.2762	2.39953	2.51388	2.7214	2.24556	6.46325	1.62085	5.13052	7.25539	3.6801	1.55974	0.677655	0.471721	chr12	36509145	36544644	-	7	circRNA	-	ENSSSCT00000024586	TRIM37	mRNA	chr12:36506172-36509144|chr12:36544644-36546108	NA	NA	04120(Ubiquitin mediated proteolysis)
circRNA1057	39	64.6667	66.3333	39.6667	19.8333	38	29.6667	27.5	20.6667	0	8.5	15.6667	3.73851	5.97336	6.06192	3.78082	2.01897	3.99682	3.11336	2.00309	2.02587	0	0.516047	1.04788	chr12	37228113	37235315	+	4	circRNA	-	ENSSSCT00000019232	VMP1	mRNA	chr12:37208496-37228112|chr12:37235315-37266914	vacuole membrane protein 1 [Source:HGNC Symbol;Acc:HGNC:29559]	GO:0016021(integral component of membrane);GO:0016020(membrane);GO:0005783(endoplasmic reticulum);GO:0005730(nucleolus);GO:0000407(pre-autophagosomal structure);GO:0034329(cell junction assembly);GO:0016337(single organismal cell-cell adhesion);GO:0010506(regulation of autophagy);GO:0007566(embryo implantation);GO:0007030(Golgi organization);GO:0007029(endoplasmic reticulum organization);GO:00068…	NA
circRNA1058	123	108	107.25	94	66.75	136	19	27	18	0	18.5	0	16.5747	14.0239	13.7779	12.5949	9.55201	20.1084	2.803	2.76465	2.48041	0	1.57888	0	chr12	37773621	37779098	+	3	circRNA	-	ENSSSCT00000019237	INTS2	mRNA	chr12:37771588-37773620|chr12:37779098-37781158	integrator complex subunit 2 [Source:HGNC Symbol;Acc:HGNC:29241]	GO:0032039(integrator complex);GO:0016020(membrane);GO:0005622(intracellular);GO:0016180(snRNA processing)	NA
circRNA1059	4	27.5	6	3.83333	16.6667	17.3333	16.3333	27.6667	27.8333	28.3333	26.5	41.6667	0.530541	3.51477	0.758675	0.505547	2.34752	2.52254	2.37171	2.78838	3.77514	2.46445	2.22609	3.85612	chr12	44468807	44476577	+	4	circRNA	-	ENSSSCT00000019302	RHOT1	mRNA	chr12:44467986-44468806|chr12:44476577-44484607	ras homolog family member T1 [Source:HGNC Symbol;Acc:HGNC:21168]	GO:0031307(integral component of mitochondrial outer membrane);GO:0016020(membrane);GO:0005741(mitochondrial outer membrane);GO:0005739(mitochondrion);GO:0097345(mitochondrial outer membrane permeabilization);GO:0047497(mitochondrion transport along microtubule);GO:0019725(cellular homeostasis);GO:0007264(small GTPase mediated signal transduction);GO:0007005(mitochondrion organization);GO:0016787…	NA
circRNA106	107.5	89.5	69.5	40.5	20.5	92	35.5	48	65.3333	9	6	31	8.63645	6.92874	5.32301	3.23525	1.74897	8.10984	3.12236	2.93024	5.36748	0.474168	0.305292	1.73777	chr4	55349876	55364656	-	2	circRNA	-	ENSSSCT00000006730	WWP1	mRNA	chr4:55339246-55349875|chr4:55364656-55368159	WW domain containing E3 ubiquitin protein ligase 1 [Source:HGNC Symbol;Acc:HGNC:17004]	GO:0070062(extracellular exosome);GO:0045892(negative regulation of transcription, DNA-templated);GO:0043161(proteasome-mediated ubiquitin-dependent protein catabolic process);GO:0016567(protein ubiquitination);GO:0061630(ubiquitin protein ligase activity);GO:0016740(transferase activity);GO:0004842(ubiquitin-protein transferase activity)	04120(Ubiquitin mediated proteolysis);04144(Endocytosis)
circRNA1060	1	0	3	1.33333	12.6667	14.3333	7.33333	15.6667	11.3333	17.3333	5	26.6667	0.199896	0	0.571703	0.265014	2.68886	3.14375	1.60484	2.37966	2.3167	2.27221	0.63301	3.71942	chr12	44476053	44476577	+	2	circRNA	-	ENSSSCT00000019302	RHOT1	mRNA	chr12:44469057-44476052|chr12:44476577-44484607	ras homolog family member T1 [Source:HGNC Symbol;Acc:HGNC:21168]	GO:0031307(integral component of mitochondrial outer membrane);GO:0016020(membrane);GO:0005741(mitochondrial outer membrane);GO:0005739(mitochondrion);GO:0097345(mitochondrial outer membrane permeabilization);GO:0047497(mitochondrion transport along microtubule);GO:0019725(cellular homeostasis);GO:0007264(small GTPase mediated signal transduction);GO:0007005(mitochondrion organization);GO:0016787…	NA
circRNA1061	198	122.333	169	110	87	54	61	62	63	113	164	36	37.9602	22.6002	30.8884	20.9692	17.7127	11.3594	12.8033	9.03214	12.3513	14.2071	19.9133	4.81581	chr12	48130101	48130320	-	1	circRNA	-	ENSSSCT00000019369	SLC6A4	mRNA	chr12:48129319-48130100|chr12:48130320-48131088	solute carrier family 6 member 4 [Source:HGNC Symbol;Acc:HGNC:11050]	GO:0098793(presynapse);GO:0045121(membrane raft);GO:0043005(neuron projection);GO:0016021(integral component of membrane);GO:0016020(membrane);GO:0012505(endomembrane system);GO:0005887(integral component of plasma membrane);GO:0005886(plasma membrane);GO:0005829(cytosol);GO:0072488(ammonium transmembrane transport);GO:0071310(cellular response to organic substance);GO:0055085(transmembrane trans…	04726(Serotonergic synapse)
circRNA1062	63	194.167	143	95.5	115.833	199.167	576.5	604	586.5	351.333	461.5	431.833	3.12982	9.29518	6.77267	4.71746	6.11102	10.8566	31.3549	22.8008	29.7958	11.4462	14.5207	14.9692	chr12	56174667	56184183	-	7	circRNA	-	ENSSSCT00000019573	MYH10	mRNA	chr12:56169269-56174666|chr12:56184183-56197336	myosin heavy chain 10 [Source:HGNC Symbol;Acc:HGNC:7568]	GO:0097513(myosin II filament);GO:0070062(extracellular exosome);GO:0043197(dendritic spine);GO:0043025(neuronal cell body);GO:0043005(neuron projection);GO:0042641(actomyosin);GO:0032154(cleavage furrow);GO:0031594(neuromuscular junction);GO:0030496(midbody);GO:0030426(growth cone);GO:0030424(axon);GO:0016460(myosin II complex);GO:0016459(myosin complex);GO:0005938(cell cortex);GO:0005903(brush …	04530(Tight junction)
circRNA1063	51.4063	39.0353	22.5726	51.931	58.306	61.2306	81.1929	124.369	84.0734	185.966	237.308	198.524	4.03014	2.94894	1.68706	4.04815	4.85421	5.26707	6.96865	7.40889	6.74018	9.56095	11.7829	10.8598	chr12	62856130	62863000	+	5	circRNA	-	ENSSSCT00000019644	ENSSSCG00000018049	mRNA	chr12:62850946-62856129|chr12:62863000-62866075	NA	GO:0060348(bone development);GO:0009165(nucleotide biosynthetic process);GO:0004749(ribose phosphate diphosphokinase activity);GO:0000287(magnesium ion binding)	NA
circRNA1064	14.7952	21.7048	23.8143	25.9048	11.8619	26.8512	76.0143	107.605	90.7286	22.1714	26.7571	32.1048	1.99372	2.81839	3.05932	3.47094	1.69745	3.97011	11.2141	11.0181	12.5024	1.95929	2.28359	3.01866	chr11	7809616	7822810	+	3	circRNA	-	ENSSSCT00000010230	B3GLCT	mRNA	chr11:7808850-7809615|chr11:7822810-7829087	beta 3-glucosyltransferase [Source:HGNC Symbol;Acc:HGNC:20207]	GO:0016020(membrane);GO:0016757(transferase activity, transferring glycosyl groups)	00514(Other types of O-glycan biosynthesis)
circRNA1065	23	9	38	6	16	15	15	20	17.3333	0	0	10	2.96665	1.11863	4.67269	0.769513	2.19159	2.12289	2.11815	1.96022	2.28628	0	0	0.899998	chr11	16789863	16791163	+	2	circRNA	-	ENSSSCT00000010282	INTS6	mRNA	chr11:16787876-16789862|chr11:16791163-16793916	integrator complex subunit 6 [Source:HGNC Symbol;Acc:HGNC:14879]	GO:0032039(integrator complex);GO:0015629(actin cytoskeleton);GO:0005654(nucleoplasm);GO:0016180(snRNA processing)	NA
circRNA1066	27	25	29	15	34	6	3	54	15	30	0	0	2.21127	1.97298	2.26424	1.22151	2.95706	0.539172	0.268985	3.36053	1.25626	1.61125	0	0	chr11	20106818	20118295	+	4	circRNA	-	ENSSSCT00000010304	SUCLA2	mRNA	chr11:20097845-20106817|chr11:20118295-20122678	succinate-CoA ligase ADP-forming beta subunit [Source:HGNC Symbol;Acc:HGNC:11448]	GO:0070062(extracellular exosome);GO:0043209(myelin sheath);GO:0005739(mitochondrion);GO:0008152(metabolic process);GO:0006099(tricarboxylic acid cycle);GO:0046872(metal ion binding);GO:0016874(ligase activity);GO:0005524(ATP binding);GO:0004775(succinate-CoA ligase (ADP-forming) activity);GO:0003824(catalytic activity);GO:0000287(magnesium ion binding);GO:0000166(nucleotide binding)	01200(Carbon metabolism);00020(Citrate cycle (TCA cycle));00640(Propanoate metabolism)
circRNA1067	1	3	1	0	2	1	3	2	4.5	0	0	0	0.140593	0.406435	0.134033	0	0.298605	0.154263	0.461757	0.213663	0.646973	0	0	0	chr11	22552052	22553042	-	2	circRNA	-	ENSSSCT00000010321	GPALPP1	mRNA	chr11:22548159-22552051|chr11:22553042-22558052	GPALPP motifs containing 1 [Source:HGNC Symbol;Acc:HGNC:20298]	NA	NA
circRNA1068	97.4	109.8	113.2	69.6	92.6	116.2	7.4	18	7.8	15.4	9	5.7	21.0674	22.8854	23.3423	14.9688	21.2698	27.5775	1.75231	2.95842	1.72526	2.18442	1.23291	0.86026	chr11	52212325	52216641	+	2	circRNA	-	ENSSSCT00000010375	ENSSSCG00000009464	mRNA	chr11:52209742-52212324|chr11:52216641-52224092	NA	NA	04919(Thyroid hormone signaling pathway)
circRNA1069	37.5	60	72	45	29.5	36.5	37	140	59	34	66.5	53.5	3.63604	5.606	6.65541	4.33846	3.03753	3.88318	3.92759	10.3148	5.85002	2.16192	4.08371	3.61954	chr10	177153	178895	+	3	circRNA	-	ENSSSCT00000011815	COG7	mRNA	chr10:171996-177152|chr10:178895-184543	component of oligomeric golgi complex 7 [Source:HGNC Symbol;Acc:HGNC:18622]	GO:0017119(Golgi transport complex);GO:0005794(Golgi apparatus);GO:0005730(nucleolus);GO:0050821(protein stabilization);GO:0034067(protein localization to Golgi apparatus);GO:0033365(protein localization to organelle);GO:0007030(Golgi organization);GO:0006890(retrograde vesicle-mediated transport, Golgi to ER);GO:0006886(intracellular protein transport);GO:0006486(protein glycosylation)	NA
circRNA107	36	26.5	29	11.5	17	61.5	18.5	50.5	25.5	1.5	50.5	34	3.25141	2.30632	2.49697	1.03275	1.6305	6.09455	1.82923	3.46574	2.35515	0.0888431	2.88867	2.14265	chr4	70757387	70762013	+	3	circRNA	-	ENSSSCT00000006788	NCOA2	mRNA	chr4:70755712-70757386|chr4:70762013-70762255	nuclear receptor coactivator 2 [Source:RefSeq peptide;Acc:NP_001107747]	GO:0005634(nucleus);GO:0045944(positive regulation of transcription from RNA polymerase II promoter);GO:0032870(cellular response to hormone stimulus);GO:0030522(intracellular receptor signaling pathway);GO:0006355(regulation of transcription, DNA-templated);GO:0035257(nuclear hormone receptor binding);GO:0030374(ligand-dependent nuclear receptor transcription coactivator activity);GO:0016922(lig…	04919(Thyroid hormone signaling pathway)
circRNA1070	162	197	171	98	132	137	43	90	59	5	72	34	38.1723	44.7305	38.4127	22.9607	33.03	35.4202	11.0925	16.1143	14.2165	0.77262	10.7449	5.59004	chr10	9709752	9731216	-	3	circRNA	-	ENSSSCT00000025633	ENSSSCG00000027207	mRNA	chr10:9665857-9709751|chr10:9731216-9812448	NA	GO:0003676(nucleic acid binding)	NA
circRNA1071	83.5	62.5	70.5	65.5	68.5	75.5	77	85.5	99	26	167.5	128	9.46738	6.82854	7.6204	7.38432	8.24775	9.39264	9.55787	7.36622	11.4786	1.93321	12.028	10.1264	chr10	29321805	29325824	+	3	circRNA	-	ENSSSCT00000011960	KDM5B	mRNA	chr10:29290189-29321804|chr10:29325824-29332924	lysine demethylase 5B [Source:HGNC Symbol;Acc:HGNC:18039]	GO:0005829(cytosol);GO:0005634(nucleus);GO:2000864(regulation of estradiol secretion);GO:0061038(uterus morphogenesis);GO:0060763(mammary duct terminal end bud growth);GO:0060444(branching involved in mammary gland duct morphogenesis);GO:0055114(oxidation-reduction process);GO:0045892(negative regulation of transcription, DNA-templated);GO:0034721(histone H3-K4 demethylation, trimethyl-H3-K4-spec…	NA
circRNA1072	45.4167	46.0833	47.45	23.3077	35.4333	36.9808	46.947	66.15	49.2652	56.8924	58.4697	54.553	3.08965	3.02095	3.07734	1.57659	2.55981	2.76037	3.49647	3.41948	3.42723	2.53812	2.5192	2.5895	chr10	29339600	29344613	+	4	circRNA	-	ENSSSCT00000011960	KDM5B	mRNA	chr10:29338167-29339599|chr10:29344613-29346246	lysine demethylase 5B [Source:HGNC Symbol;Acc:HGNC:18039]	GO:0005829(cytosol);GO:0005634(nucleus);GO:2000864(regulation of estradiol secretion);GO:0061038(uterus morphogenesis);GO:0060763(mammary duct terminal end bud growth);GO:0060444(branching involved in mammary gland duct morphogenesis);GO:0055114(oxidation-reduction process);GO:0045892(negative regulation of transcription, DNA-templated);GO:0034721(histone H3-K4 demethylation, trimethyl-H3-K4-spec…	NA
circRNA1073	50.7917	63.8353	55.8455	41.2049	50.8854	55.0141	46.1136	57.9295	45.3793	82.6944	60.0253	65.1919	2.61574	3.16787	2.7418	2.10998	2.78289	3.10866	2.59991	2.26693	2.38984	2.79281	1.95782	2.34261	chr10	29342271	29352504	+	5	circRNA	-	ENSSSCT00000011960	KDM5B	mRNA	chr10:29340599-29342270|chr10:29352504-29360189	lysine demethylase 5B [Source:HGNC Symbol;Acc:HGNC:18039]	GO:0005829(cytosol);GO:0005634(nucleus);GO:2000864(regulation of estradiol secretion);GO:0061038(uterus morphogenesis);GO:0060763(mammary duct terminal end bud growth);GO:0060444(branching involved in mammary gland duct morphogenesis);GO:0055114(oxidation-reduction process);GO:0045892(negative regulation of transcription, DNA-templated);GO:0034721(histone H3-K4 demethylation, trimethyl-H3-K4-spec…	NA
circRNA1074	11	5	14	5	22	15	35	20	22	27	22	9	1.37266	0.601235	1.66549	0.620391	2.91537	2.0538	4.78151	1.89642	2.80738	2.20951	1.73872	0.783637	chr10	33646093	33649475	+	2	circRNA	-	ENSSSCT00000011993	ENSSSCG00000010957	mRNA	chr10:33640125-33646092|chr10:33649475-33665932	NA	NA	NA
circRNA1075	44	88	95	13	78	69.5	62	60	125	76	12	28	6.92475	13.3456	14.2535	2.03433	13.0361	12.0014	10.6824	7.17527	20.1173	7.84383	1.19611	3.07477	chr10	35382114	35384249	+	2	circRNA	-	ENSSSCT00000027988	UBQLN1	mRNA	chr10:35363761-35382113|chr10:35384249-35388777	ubiquilin 1 [Source:HGNC Symbol;Acc:HGNC:12508]	GO:0048471(perinuclear region of cytoplasm);GO:0043234(protein complex);GO:0016235(aggresome);GO:0005886(plasma membrane);GO:0005829(cytosol);GO:0005783(endoplasmic reticulum);GO:0005776(autophagosome);GO:0005737(cytoplasm);GO:0005654(nucleoplasm);GO:1903071(positive regulation of ER-associated ubiquitin-dependent protein catabolic process);GO:1902175(regulation of oxidative stress-induced intrin…	04141(Protein processing in endoplasmic reticulum)
circRNA1076	209.167	289	227.5	285	160	162	140	234.5	132.5	156	124	163.5	20.3277	27.0644	21.0777	27.5402	16.5127	17.2746	14.8954	17.3171	13.168	9.94224	7.63229	11.0871	chr10	37486613	37494346	+	4	circRNA	-	ENSSSCT00000012037	BAG1	mRNA	chr10:37485085-37486612|chr10:37494346-37495861	BCL2 associated athanogene 1 [Source:HGNC Symbol;Acc:HGNC:937]	GO:0051087(chaperone binding)	NA
circRNA1077	33	2	30	7	11	44	43	75	113	92	17	66	3.38656	0.197778	2.93502	0.71428	1.19878	4.95444	4.83103	5.84845	11.8585	6.19149	1.10492	4.72597	chr10	43540672	43549096	+	5	circRNA	-	ENSSSCT00000012052	C9orf72	mRNA	chr10:43538863-43540671|chr10:43549096-43551688	chromosome 9 open reading frame 72 [Source:HGNC Symbol;Acc:HGNC:28337]	GO:0005776(autophagosome);GO:0005768(endosome);GO:0005764(lysosome);GO:0005634(nucleus);GO:0005615(extracellular space);GO:0006914(autophagy);GO:0006897(endocytosis);GO:0017137(Rab GTPase binding)	NA
circRNA1078	12.3333	7.66667	11	4.66667	6.16667	4.66667	21	29.3333	27.3333	6	15.3333	3.66667	1.27812	0.765602	1.08675	0.480867	0.678647	0.530635	2.38253	2.30988	2.89663	0.407761	1.00639	0.265135	chr10	45205133	45206053	+	2	circRNA	-	ENSSSCT00000012060	ENSSSCG00000011018	mRNA	chr10:45198118-45205132|chr10:45206053-45207520	NA	NA	NA
circRNA1079	5.25	4.5	3.25	9.1	3.45	8.75	10.85	24.65	18.35	26	39.25	26.5	0.823177	0.679909	0.485806	1.41874	0.574453	1.50536	1.86248	2.93688	2.94224	2.67344	3.89772	2.89923	chr10	50698422	50702358	+	3	circRNA	-	ENSSSCT00000012089	MINDY3	mRNA	chr10:50697279-50698421|chr10:50702358-50717698	MINDY lysine 48 deubiquitinase 3 [Source:HGNC Symbol;Acc:HGNC:23578]	GO:0031965(nuclear membrane);GO:0005654(nucleoplasm);GO:0071108(protein K48-linked deubiquitination);GO:0006508(proteolysis);GO:1990380(Lys48-specific deubiquitinase activity);GO:0016807(cysteine-type carboxypeptidase activity)	NA
circRNA108	33	55	23	32	45	54	22	78	27	14	26	18	4.78307	7.68176	3.17809	4.61179	6.9264	8.58785	3.49095	8.59059	4.00189	1.33071	2.38673	1.82041	chr4	84304853	84308025	+	2	circRNA	-	ENSSSCT00000006862	ATP6V1H	mRNA	chr4:84297325-84304852|chr4:84308025-84316110	ATPase H+ transporting V1 subunit H [Source:HGNC Symbol;Acc:HGNC:18303]	GO:0070062(extracellular exosome);GO:0005765(lysosomal membrane);GO:0000221(vacuolar proton-transporting V-type ATPase, V1 domain);GO:0015991(ATP hydrolysis coupled proton transport);GO:0006897(endocytosis);GO:0046961(proton-transporting ATPase activity, rotational mechanism);GO:0016820(hydrolase activity, acting on acid anhydrides, catalyzing transmembrane movement of substances)	00190(Oxidative phosphorylation);04145(Phagosome);04142(Lysosome);04721(Synaptic vesicle cycle);05323(Rheumatoid arthritis);05152(Tuberculosis)
circRNA1080	39.0476	20.3214	17.1429	10.3095	4.52381	11.6905	16.5476	30.5455	20.2905	19.329	27.7619	14.1429	3.912	1.96184	1.63732	1.027	0.481294	1.28509	1.81496	2.32534	2.07876	1.26992	1.76153	0.988654	chr10	54055539	54058085	+	3	circRNA	-	ENSSSCT00000012110	YME1L1	mRNA	chr10:54054083-54055538|chr10:54058085-54058994	YME1 like 1 ATPase [Source:HGNC Symbol;Acc:HGNC:12843]	GO:0016604(nuclear body);GO:0016020(membrane);GO:0005743(mitochondrial inner membrane);GO:0005739(mitochondrion);GO:0035694(mitochondrial protein catabolic process);GO:0008283(cell proliferation);GO:0007005(mitochondrion organization);GO:0006515(misfolded or incompletely synthesized protein catabolic process);GO:0006508(proteolysis);GO:0008237(metallopeptidase activity);GO:0005524(ATP binding);GO…	NA
circRNA1081	126	194	145	96	88	161	440	485	424	92	63	57	19.3252	28.6721	21.2015	14.6403	14.333	27.0942	73.8811	56.5237	66.501	9.25346	6.11971	6.10002	chr10	75519292	75524742	-	2	circRNA	-	ENSSSCT00000029839	ENSSSCG00000029602	mRNA	chr10:75516358-75519291|chr10:75524742-75535017	NA	GO:0070545(PeBoW complex);GO:0030687(preribosome, large subunit precursor);GO:0000470(maturation of LSU-rRNA);GO:0000460(maturation of 5.8S rRNA)	NA
circRNA1082	685.017	702.7	838.683	547.7	580.05	609.5	526.383	669.667	543.983	363.333	277.267	229.467	18.7007	18.4855	21.8273	14.8671	16.8161	18.257	15.7321	13.8916	15.1863	6.50468	4.79394	4.371	chr10	75673703	75704449	+	12	circRNA	-	ENSSSCT00000012224	LARP4B	mRNA	chr10:75649586-75673702|chr10:75704449-75706621	La ribonucleoprotein domain family member 4B [Source:HGNC Symbol;Acc:HGNC:28987]	GO:0042788(polysomal ribosome);GO:0016020(membrane);GO:0010494(cytoplasmic stress granule);GO:0005829(cytosol);GO:0005730(nucleolus);GO:0045727(positive regulation of translation);GO:0003723(RNA binding);GO:0003676(nucleic acid binding);GO:0000166(nucleotide binding)	NA
circRNA1083	151	237	135	122	186	124	440	412	380	239	204	334	22.4256	33.9173	19.1138	18.0158	29.3348	20.2063	71.5398	46.4944	57.7112	23.2771	19.1882	34.6113	chr10	77000880	77001883	+	2	circRNA	-	ENSSSCT00000012233	CTSV	mRNA	chr10:77000185-77000879|chr10:77001883-77003101	cathepsin V [Source:HGNC Symbol;Acc:HGNC:2538]	GO:0070062(extracellular exosome);GO:0031410(cytoplasmic vesicle);GO:0005764(lysosome);GO:0005730(nucleolus);GO:0005634(nucleus);GO:0005615(extracellular space);GO:2000249(regulation of actin cytoskeleton reorganization);GO:0051603(proteolysis involved in cellular protein catabolic process);GO:0046697(decidualization);GO:0031069(hair follicle morphogenesis);GO:0016540(protein autoprocessing);GO:0…	04145(Phagosome);04142(Lysosome);04612(Antigen processing and presentation);05205(Proteoglycans in cancer);05323(Rheumatoid arthritis)
circRNA1084	4	0	2	31	22	17	20	42	11	0	0	13	0.860776	0	0.410304	6.63312	5.02753	4.01399	4.71181	6.86775	2.42065	0	0	1.95199	chr17	12609677	12609872	+	1	circRNA	-	ENSSSCT00000028545	THAP1	mRNA	chr17:12607835-12609676|chr17:12609872-12611308	THAP domain containing 1 [Source:HGNC Symbol;Acc:HGNC:20856]	GO:0043231(intracellular membrane-bounded organelle);GO:0005634(nucleus);GO:0001650(fibrillar center);GO:0007346(regulation of mitotic cell cycle);GO:0006355(regulation of transcription, DNA-templated);GO:0006351(transcription, DNA-templated);GO:0001935(endothelial cell proliferation);GO:0043565(sequence-specific DNA binding);GO:0042802(identical protein binding);GO:0008270(zinc ion binding);GO:0…	NA
circRNA1085	10.3333	28.5	4.5	8	15.1667	12	18.8333	24.9	21	18.6667	20	7.75	0.774137	2.05744	0.321392	0.595928	1.20662	0.986408	1.54466	1.41747	1.60881	0.917081	0.948953	0.405119	chr17	41844789	41850145	-	3	circRNA	-	ENSSSCT00000007949	CDK5RAP1	mRNA	chr17:41843521-41844788|chr17:41850145-41852653	CDK5 regulatory subunit associated protein 1 [Source:HGNC Symbol;Acc:HGNC:15880]	GO:0005739(mitochondrion);GO:0005737(cytoplasm);GO:0070900(mitochondrial tRNA modification);GO:0070131(positive regulation of mitochondrial translation);GO:0045903(positive regulation of translational fidelity);GO:0045736(negative regulation of cyclin-dependent protein serine/threonine kinase activity);GO:0043412(macromolecule modification);GO:0035600(tRNA methylthiolation);GO:0009451(RNA modific…	NA
circRNA1086	404	507.5	587	356	435	524.5	1122.5	1519.75	1251	516.5	501	430.5	22.0154	26.6493	30.495	19.2895	25.1731	31.3609	66.9667	62.9293	69.7126	18.4577	17.291	16.369	chr17	44400340	44412496	-	7	circRNA	-	ENSSSCT00000007997	RBM39	mRNA	chr17:44398342-44400339|chr17:44412496-44414236	RNA binding motif protein 39 [Source:HGNC Symbol;Acc:HGNC:15923]	GO:0016607(nuclear speck);GO:0015630(microtubule cytoskeleton);GO:0005815(microtubule organizing center);GO:0005654(nucleoplasm);GO:0005634(nucleus);GO:0006397(mRNA processing);GO:0003723(RNA binding);GO:0003676(nucleic acid binding);GO:0000166(nucleotide binding)	NA
circRNA1087	28	57	99	69	95	85	205	261	127	131	193	179	3.04377	5.97082	10.2597	7.45813	10.9668	10.1384	24.397	21.5591	14.1178	9.33875	13.2877	13.5772	chr17	59385749	59391561	-	4	circRNA	-	ENSSSCT00000008185	ATP9A	mRNA	chr17:59384036-59385748|chr17:59391561-59394464	ATPase phospholipid transporting 9A (putative) [Source:HGNC Symbol;Acc:HGNC:13540]	GO:0016021(integral component of membrane);GO:0016020(membrane);GO:0005802(trans-Golgi network);GO:0005768(endosome);GO:0045332(phospholipid translocation);GO:0015914(phospholipid transport);GO:0046872(metal ion binding);GO:0016787(hydrolase activity);GO:0005524(ATP binding);GO:0004012(phospholipid-translocating ATPase activity);GO:0000287(magnesium ion binding);GO:0000166(nucleotide binding);GO:…	NA
circRNA1088	3.75	0.5	4	5.25	3.25	4.5	6.75	14	7.75	10	5.45	0.25	0.739101	0.0949614	0.751584	1.02886	0.680233	0.973156	1.45648	2.0967	1.56201	1.29251	0.680308	0.0343808	chr16	23698631	23703306	-	2	circRNA	-	ENSSSCT00000018343	NUP155	mRNA	chr16:23695622-23698630|chr16:23703306-23705392	nucleoporin 155 [Source:HGNC Symbol;Acc:HGNC:8063]	GO:0044611(nuclear pore inner ring);GO:0016020(membrane);GO:0005643(nuclear pore);GO:0005635(nuclear envelope);GO:0086014(atrial cardiac muscle cell action potential);GO:0036228(protein targeting to nuclear inner membrane);GO:0006998(nuclear envelope organization);GO:0006913(nucleocytoplasmic transport);GO:0006606(protein import into nucleus);GO:0006406(mRNA export from nucleus);GO:0006405(RNA ex…	03013(RNA transport)
circRNA1089	1.33333	6.58333	3.66667	0.666667	3.66667	3	3.33333	12.9167	9.25	11	2.66667	11.5	0.189351	0.900907	0.496417	0.0941379	0.552972	0.467464	0.518246	1.39385	1.34332	1.02444	0.239848	1.13954	chr16	25422928	25426853	-	2	circRNA	-	ENSSSCT00000018353	RICTOR	mRNA	chr16:25416980-25422927|chr16:25426853-25433583	RPTOR independent companion of MTOR complex 2 [Source:HGNC Symbol;Acc:HGNC:28611]	GO:0031932(TORC2 complex);GO:2000114(regulation of establishment of cell polarity);GO:0051897(positive regulation of protein kinase B signaling);GO:0051896(regulation of protein kinase B signaling);GO:0050731(positive regulation of peptidyl-tyrosine phosphorylation);GO:0050727(regulation of inflammatory response);GO:0043087(regulation of GTPase activity);GO:0043085(positive regulation of catalyti…	04150(mTOR signaling pathway)
circRNA109	37.5	21	41	37	55	48	11	15	19	0	16	0	5.87983	3.17291	6.12862	5.76849	9.15795	8.25796	1.88823	1.78715	3.04646	0	1.58888	0	chr4	87209598	87214970	+	2	circRNA	-	ENSSSCT00000006873	PRKDC	mRNA	chr4:87207119-87209597|chr4:87214970-87215601	protein kinase, DNA-activated, catalytic polypeptide [Source:HGNC Symbol;Acc:HGNC:9413]	GO:0070419(nonhomologous end joining complex);GO:0031012(extracellular matrix);GO:0016020(membrane);GO:0005958(DNA-dependent protein kinase-DNA ligase 4 complex);GO:0005667(transcription factor complex);GO:0005654(nucleoplasm);GO:0005634(nucleus);GO:0000784(nuclear chromosome, telomeric region);GO:0072431(signal transduction involved in mitotic G1 DNA damage checkpoint);GO:0048660(regulation of s…	03450(Non-homologous end-joining);04110(Cell cycle)
circRNA1090	5.7	0.4	9.15	6.4	12.35	4.4	12.8	18.6	9.9	12	50.4	17.8	0.662299	0.0447862	1.01355	0.739411	1.52387	0.560957	1.62823	1.64221	1.17631	0.914374	3.70892	1.44312	chr16	36914607	36919852	-	3	circRNA	-	ENSSSCT00000031358	SLC38A9	mRNA	chr16:36907929-36914606|chr16:36919852-36925840	solute carrier family 38 member 9 [Source:HGNC Symbol;Acc:HGNC:26907]	GO:0071986(Ragulator complex);GO:0043231(intracellular membrane-bounded organelle);GO:0016021(integral component of membrane);GO:0016020(membrane);GO:0005770(late endosome);GO:0005764(lysosome);GO:0005654(nucleoplasm);GO:0071230(cellular response to amino acid stimulus);GO:0032008(positive regulation of TOR signaling);GO:0003333(amino acid transmembrane transport);GO:0015171(amino acid transmembr…	NA
circRNA1091	41.5833	66.4167	78.4167	49.5833	42.9333	89.2	51.3333	82.6167	49.2167	29.75	73.0333	31	6.11116	9.40559	10.9865	7.24546	6.7004	14.3836	8.25907	9.22587	7.39648	2.86718	6.7977	3.17884	chr16	47800356	47811066	+	3	circRNA	-	ENSSSCT00000018461	ENSSSCG00000016953	mRNA	chr16:47794387-47800355|chr16:47811066-47813570	NA	GO:0032088(negative regulation of NF-kappaB transcription factor activity);GO:0007165(signal transduction);GO:0005176(ErbB-2 class receptor binding)	NA
circRNA1092	35	37	49	54	12	70	42	70	60	163	69	99	5.76652	5.87425	7.6964	8.84639	2.09956	12.6544	7.5757	8.76354	10.109	17.6115	7.19999	11.3811	chr16	77439557	77440260	-	2	circRNA	-	ENSSSCT00000018595	G3BP1	mRNA	chr16:77436793-77439556|chr16:77440260-77442774	ras GTPase-activating protein-binding protein 1 [Source:RefSeq peptide;Acc:NP_001192334]	GO:0030529(intracellular ribonucleoprotein complex);GO:0010494(cytoplasmic stress granule);GO:0005925(focal adhesion);GO:0005829(cytosol);GO:0005622(intracellular);GO:0090090(negative regulation of canonical Wnt signaling pathway);GO:0006810(transport);GO:0003729(mRNA binding);GO:0003723(RNA binding);GO:0003676(nucleic acid binding);GO:0000166(nucleotide binding)	NA
circRNA1093	17.1667	12.1667	9.83333	20.3333	35.3333	31.5	29	49	31.75	57.1667	85.5	64.5	2.88468	1.9701	1.57528	3.3974	6.3052	5.80792	5.33504	6.25668	5.45588	6.29968	9.09946	7.56267	chr15	19253545	19263276	-	3	circRNA	-	ENSSSCT00000017095	RAB3GAP1	mRNA	chr15:19251646-19253544|chr15:19263276-19268259	RAB3 GTPase activating protein catalytic subunit 1 [Source:HGNC Symbol;Acc:HGNC:17063]	GO:0098794(postsynapse);GO:0071782(endoplasmic reticulum tubular network);GO:0070062(extracellular exosome);GO:0043234(protein complex);GO:0005811(lipid particle);GO:0005794(Golgi apparatus);GO:0005737(cytoplasm);GO:2000786(positive regulation of autophagosome assembly);GO:1903373(positive regulation of endoplasmic reticulum tubular network organization);GO:1903233(regulation of calcium ion-depen…	NA
circRNA1094	26	27	18.5	14.5	23	10.5	39.5	62.5	37.5	30	15.5	13	1.68972	1.69087	1.14619	0.936992	1.58734	0.748735	2.81038	3.08643	2.49219	1.27857	0.637984	0.589506	chr15	28837231	28841166	+	5	circRNA	-	ENSSSCT00000030086	MAP3K2	mRNA	chr15:28835685-28837230|chr15:28841166-28848076	mitogen-activated protein kinase kinase kinase 2 [Source:HGNC Symbol;Acc:HGNC:6854]	GO:0005829(cytosol);GO:0005737(cytoplasm);GO:0005654(nucleoplasm);GO:0071260(cellular response to mechanical stimulus);GO:0045893(positive regulation of transcription, DNA-templated);GO:0030036(actin cytoskeleton organization);GO:0023014(signal transduction by protein phosphorylation);GO:0006468(protein phosphorylation);GO:0019901(protein kinase binding);GO:0005524(ATP binding);GO:0004702(signal …	04010(MAPK signaling pathway);04540(Gap junction);04912(GnRH signaling pathway)
circRNA1095	64.5	46	77.5	25.25	34.75	23.25	40.75	61.5	52.5	52.5	90.25	65	10.1891	7.00225	11.6714	3.96609	5.8295	4.02991	7.04741	7.38219	8.48092	5.43873	9.0294	7.16459	chr15	34890619	34895324	+	3	circRNA	-	ENSSSCT00000024092	ENSSSCG00000027791	mRNA	chr15:34889476-34890618|chr15:34895324-34897186	NA	GO:0005881(cytoplasmic microtubule);GO:0005828(kinetochore microtubule);GO:0051010(microtubule plus-end binding);GO:0043515(kinetochore binding)	NA
circRNA1096	12.5	17	11	8	13	5	35	23.5	29	53	29	56.5	2.44086	3.19879	2.04772	1.55328	2.69574	1.07127	7.48217	3.48687	5.79081	6.7869	3.58647	7.69811	chr15	54711267	54711790	+	2	circRNA	-	ENSSSCT00000017219	PLEKHA2	mRNA	chr15:54710444-54711266|chr15:54711790-54712194	pleckstrin homology domain containing A2 [Source:HGNC Symbol;Acc:HGNC:14336]	GO:0016020(membrane);GO:0005737(cytoplasm);GO:0035091(phosphatidylinositol binding);GO:0030165(PDZ domain binding);GO:0005545(1-phosphatidylinositol binding)	NA
circRNA1097	29.5	40.5	100.5	40.5	48	61	129	118.5	100.5	20	33	31	3.23182	4.27548	10.4963	4.41171	5.58429	7.33251	15.4719	9.86459	11.259	1.43687	2.28969	2.36968	chr15	61883151	61892350	+	3	circRNA	-	ENSSSCT00000017253	GTF2E2	mRNA	chr15:61862476-61883150|chr15:61892350-61918746	general transcription factor IIE subunit 2 [Source:HGNC Symbol;Acc:HGNC:4651]	GO:0016607(nuclear speck);GO:0005829(cytosol);GO:0005669(transcription factor TFIID complex);GO:0005654(nucleoplasm);GO:0005634(nucleus);GO:0006367(transcription initiation from RNA polymerase II promoter);GO:0006355(regulation of transcription, DNA-templated);GO:0006351(transcription, DNA-templated);GO:0003723(RNA binding);GO:0003677(DNA binding)	NA
circRNA1098	61.4167	55.0833	65.25	36.0833	37	33.1667	38.7167	35.75	37.4	28.2667	26	33.1667	5.46505	4.72316	5.5352	3.19257	3.49632	3.23823	3.77166	2.41724	3.4032	1.64947	1.46527	2.05927	chr15	71703524	71709108	-	2	circRNA	-	ENSSSCT00000017285	ACVR1	mRNA	chr15:71690350-71703523|chr15:71709108-71715507	activin A receptor type 1 [Source:HGNC Symbol;Acc:HGNC:171]	GO:0048179(activin receptor complex);GO:0045177(apical part of cell);GO:0016021(integral component of membrane);GO:0016020(membrane);GO:0005887(integral component of plasma membrane);GO:2001237(negative regulation of extrinsic apoptotic signaling pathway);GO:2000017(positive regulation of determination of dorsal identity);GO:1905007(positive regulation of epithelial to mesenchymal transition invo…	04350(TGF-beta signaling pathway);04060(Cytokine-cytokine receptor interaction);04550(Signaling pathways regulating pluripotency of stem cells)
circRNA1099	2.5	0	3.5	0.5	5.5	2	0	0	4	0	0	0	0.68029	0	0.907962	0.135285	1.58935	0.597148	0	0	1.11307	0	0	0	chr15	73552151	73552402	-	2	circRNA	-	ENSSSCT00000017294	BAZ2B	mRNA	chr15:73548370-73552150|chr15:73552402-73557012	bromodomain adjacent to zinc finger domain 2B [Source:HGNC Symbol;Acc:HGNC:963]	GO:0005634(nucleus);GO:0046872(metal ion binding);GO:0008270(zinc ion binding);GO:0003677(DNA binding)	NA
circRNA11	56.4167	57.1667	60.1167	41.0833	32.5	62.55	64.75	107.5	51.2667	104.917	116.4	69.25	5.1173	4.99667	5.19844	3.70532	3.13053	6.22527	6.42984	7.4093	4.75529	6.24081	6.68687	4.38285	chr7	62801435	62812567	+	4	circRNA	-	ENSSSCT00000002103	PTPN9	mRNA	chr7:62767801-62801434|chr7:62812567-62827071	protein tyrosine phosphatase, non-receptor type 9 [Source:HGNC Symbol;Acc:HGNC:9661]	GO:0005737(cytoplasm);GO:0035335(peptidyl-tyrosine dephosphorylation);GO:0016311(dephosphorylation);GO:0006470(protein dephosphorylation);GO:0016791(phosphatase activity);GO:0016787(hydrolase activity);GO:0004725(protein tyrosine phosphatase activity);GO:0004721(phosphoprotein phosphatase activity)	NA
circRNA110	32	36.6667	25.3333	21	20	36.6667	32.6667	59.3333	24	2.33333	15	15	3.85627	4.25789	2.91042	2.51631	2.55947	4.84827	4.30973	5.43316	2.95759	0.184399	1.14484	1.26128	chr4	87318496	87322078	+	2	circRNA	-	ENSSSCT00000006873	PRKDC	mRNA	chr4:87310446-87318495|chr4:87322078-87324355	protein kinase, DNA-activated, catalytic polypeptide [Source:HGNC Symbol;Acc:HGNC:9413]	GO:0070419(nonhomologous end joining complex);GO:0031012(extracellular matrix);GO:0016020(membrane);GO:0005958(DNA-dependent protein kinase-DNA ligase 4 complex);GO:0005667(transcription factor complex);GO:0005654(nucleoplasm);GO:0005634(nucleus);GO:0000784(nuclear chromosome, telomeric region);GO:0072431(signal transduction involved in mitotic G1 DNA damage checkpoint);GO:0048660(regulation of s…	03450(Non-homologous end-joining);04110(Cell cycle)
circRNA1100	4	2.66667	9.33333	7.75	7.16667	13.75	11.25	6.66667	6.83333	9.75	6.33333	5.33333	0.629522	0.404413	1.40034	1.21277	1.19776	2.37439	1.93835	0.797252	1.09975	1.00628	0.631278	0.58567	chr15	97749979	97757643	+	2	circRNA	-	ENSSSCT00000017440	DNAJC10	mRNA	chr15:97749448-97749978|chr15:97757643-97759605	DnaJ heat shock protein family (Hsp40) member C10 [Source:HGNC Symbol;Acc:HGNC:24637]	GO:0034663(endoplasmic reticulum chaperone complex);GO:0016020(membrane);GO:0005788(endoplasmic reticulum lumen);GO:0005783(endoplasmic reticulum);GO:0070059(intrinsic apoptotic signaling pathway in response to endoplasmic reticulum stress);GO:0055114(oxidation-reduction process);GO:0045454(cell redox homeostasis);GO:0034976(response to endoplasmic reticulum stress);GO:0034975(protein folding in …	04141(Protein processing in endoplasmic reticulum)
circRNA1101	557.5	460.5	360.5	322.5	324	393	35	84	31	2.5	6	4	48.5831	38.6701	29.9496	27.9445	29.9839	37.5777	3.33915	5.56231	2.76256	0.142871	0.331153	0.243223	chr15	111219789	111234859	-	4	circRNA	-	ENSSSCT00000017494	ENSSSCG00000016068	mRNA	chr15:111214113-111219788|chr15:111234859-111244690	E3 ubiquitin-protein ligase HECW2 [Source:RefSeq peptide;Acc:NP_001185853]	NA	NA
circRNA1102	19	28	43.5	24	35	27	26	47.25	21	6	30.3333	28	2.69826	3.83171	5.88931	3.38897	5.27837	4.20718	4.04232	5.09879	3.0497	0.558784	2.72827	2.77454	chr15	115465676	115466348	+	2	circRNA	-	ENSSSCT00000027335	AOX1	mRNA	chr15:115461689-115465675|chr15:115466348-115468487	aldehyde oxidase 1 [Source:RefSeq peptide;Acc:NP_001295402]	GO:0070062(extracellular exosome);GO:0016604(nuclear body);GO:0005829(cytosol);GO:0055114(oxidation-reduction process);GO:0051537(2 iron, 2 sulfur cluster binding);GO:0051536(iron-sulfur cluster binding);GO:0051287(NAD binding);GO:0050660(flavin adenine dinucleotide binding);GO:0046872(metal ion binding);GO:0016614(oxidoreductase activity, acting on CH-OH group of donors);GO:0016491(oxidoreductas…	00280(Valine, leucine and isoleucine degradation);00350(Tyrosine metabolism);00380(Tryptophan metabolism);00750(Vitamin B6 metabolism);00760(Nicotinate and nicotinamide metabolism);00830(Retinol metabolism);00982(Drug metabolism - cytochrome P450)
circRNA1103	17	14	31	65	74	79	143	123	110	109	65	48	1.99729	1.58498	3.47215	7.59331	9.23262	10.1839	18.3931	10.9808	13.2158	8.3981	4.83662	3.93492	chr15	117690764	117703208	+	3	circRNA	-	ENSSSCT00000017545	FAM117B	mRNA	chr15:117640570-117690763|chr15:117703208-117726404	family with sequence similarity 117 member B [Source:HGNC Symbol;Acc:HGNC:14440]	NA	NA
circRNA1104	0	3.5	5.5	1	8	28	17.5	29.5	28.3333	0	14.3333	14.8333	0	0.241515	0.375473	0.0712028	0.608363	2.20002	1.37194	1.6052	2.0748	0	0.650062	0.741161	chr15	129615579	129639319	-	5	circRNA	-	ENSSSCT00000017605	BARD1	mRNA	chr15:129597144-129615578|chr15:129639319-129641123	BRCA1 associated RING domain 1 [Source:HGNC Symbol;Acc:HGNC:952]	GO:0070531(BRCA1-A complex);GO:0031436(BRCA1-BARD1 complex);GO:0016607(nuclear speck);GO:0005737(cytoplasm);GO:0005634(nucleus);GO:0000932(P-body);GO:0085020(protein K6-linked ubiquitination);GO:0046826(negative regulation of protein export from nucleus);GO:0043066(negative regulation of apoptotic process);GO:0043065(positive regulation of apoptotic process);GO:0042325(regulation of phosphorylati…	NA
circRNA1105	10	4	3	1.5	1.5	3	20	14	12.5	8.5	29.5	27	1.10414	0.425586	0.315783	0.16468	0.17588	0.363447	2.41758	1.17459	1.41137	0.615467	2.06292	2.08013	chr15	131201187	131208307	-	3	circRNA	-	ENSSSCT00000028863	PECR	mRNA	chr15:131195455-131201186|chr15:131208307-131216577	peroxisomal trans-2-enoyl-CoA reductase [Source:HGNC Symbol;Acc:HGNC:18281]	GO:0005777(peroxisome);GO:0005739(mitochondrion);GO:0055114(oxidation-reduction process);GO:0033306(phytol metabolic process);GO:0019166(trans-2-enoyl-CoA reductase (NADPH) activity);GO:0005102(receptor binding)	01212(Fatty acid metabolism);01040(Biosynthesis of unsaturated fatty acids);04146(Peroxisome)
circRNA1106	0	2	8	0	0.5	0.5	1	15	7.5	0	6	13.5	0	0.316292	1.25167	0	0.0871414	0.0900369	0.179672	1.87059	1.2587	0	0.62365	1.54593	chr15	133579638	133580228	-	2	circRNA	-	ENSSSCT00000017635	USP37	mRNA	chr15:133572944-133579637|chr15:133580228-133584610	ubiquitin specific peptidase 37 [Source:HGNC Symbol;Acc:HGNC:20063]	GO:0005634(nucleus);GO:0071108(protein K48-linked deubiquitination);GO:0051301(cell division);GO:0035871(protein K11-linked deubiquitination);GO:0016579(protein deubiquitination);GO:0007067(mitotic nuclear division);GO:0007049(cell cycle);GO:0006511(ubiquitin-dependent protein catabolic process);GO:0006508(proteolysis);GO:0006275(regulation of DNA replication);GO:0000082(G1/S transition of mitoti…	NA
circRNA1107	952	767	725	555	484	604	1800	2340	1562	3242	3156	2106	187.633	145.671	136.225	108.766	101.302	130.619	388.394	350.448	314.82	419.033	393.955	289.624	chr14	6917870	6918083	+	1	circRNA	-	ENSSSCT00000010546	BMP1	mRNA	chr14:6917526-6917869|chr14:6918083-6919932	bone morphogenetic protein 1 [Source:HGNC Symbol;Acc:HGNC:1067]	GO:0005615(extracellular space);GO:0061036(positive regulation of cartilage development);GO:0006508(proteolysis);GO:0046872(metal ion binding);GO:0016787(hydrolase activity);GO:0008270(zinc ion binding);GO:0008237(metallopeptidase activity);GO:0008233(peptidase activity);GO:0005509(calcium ion binding);GO:0004222(metalloendopeptidase activity)	NA
circRNA1108	529.667	469.667	523.167	328.833	418.333	569.833	258	295.167	276.5	219.5	126.5	96	41.6796	35.6136	39.247	25.729	34.9579	49.2002	22.2264	17.6492	22.2498	11.3271	6.30447	5.27103	chr14	10500874	10509224	+	5	circRNA	-	ENSSSCT00000010579	DOCK5	mRNA	chr14:10493976-10500873|chr14:10509224-10510230	dedicator of cytokinesis 5 [Source:HGNC Symbol;Acc:HGNC:23476]	GO:0005886(plasma membrane);GO:0005829(cytosol);GO:0005737(cytoplasm);GO:1904754(positive regulation of vascular associated smooth muscle cell migration);GO:1904694(negative regulation of vascular smooth muscle contraction);GO:1900026(positive regulation of substrate adhesion-dependent cell spreading);GO:0043547(positive regulation of GTPase activity);GO:0010634(positive regulation of epithelial …	NA
circRNA1109	216.5	210.667	180	184.333	199.667	220.167	73.5	75.6667	97.1667	85	69.5	72.5	37.4243	35.0911	29.6629	31.683	36.6525	41.7585	13.9095	9.93885	17.176	9.63559	7.60883	8.74455	chr14	10511192	10513787	+	2	circRNA	-	ENSSSCT00000010579	DOCK5	mRNA	chr14:10510301-10511191|chr14:10513787-10518385	dedicator of cytokinesis 5 [Source:HGNC Symbol;Acc:HGNC:23476]	GO:0005886(plasma membrane);GO:0005829(cytosol);GO:0005737(cytoplasm);GO:1904754(positive regulation of vascular associated smooth muscle cell migration);GO:1904694(negative regulation of vascular smooth muscle contraction);GO:1900026(positive regulation of substrate adhesion-dependent cell spreading);GO:0043547(positive regulation of GTPase activity);GO:0010634(positive regulation of epithelial …	NA
circRNA111	230	193	145	141	202	134	27	13	21	0	74	7	40.7603	32.9588	24.4975	24.8459	38.0156	26.0562	5.23842	1.7506	3.80572	0	8.30573	0.865586	chr4	102815022	102816499	+	2	circRNA	-	ENSSSCT00000007121	ARHGEF2	mRNA	chr4:102814327-102815021|chr4:102816499-102818607	Rho/Rac guanine nucleotide exchange factor 2 [Source:HGNC Symbol;Acc:HGNC:682]	GO:0043234(protein complex);GO:0043198(dendritic shaft);GO:0043025(neuronal cell body);GO:0032587(ruffle membrane);GO:0031982(vesicle);GO:0014069(postsynaptic density);GO:0005925(focal adhesion);GO:0005874(microtubule);GO:0005856(cytoskeleton);GO:0005737(cytoplasm);GO:0002102(podosome);GO:1904685(positive regulation of metalloendopeptidase activity);GO:1900745(positive regulation of p38MAPK casca…	NA
circRNA1110	46	29	35	40	26	36	19	48	43	0	26	0	1.90588	1.15782	1.38246	1.64788	1.14397	1.63658	0.861825	1.51118	1.82186	0	0.682258	0	chr14	13485087	13486104	+	1	circRNA	-	ENSSSCT00000010613	FZD3	mRNA	chr14:13478083-13485086|chr14:13486104-13520695	frizzled class receptor 3 [Source:HGNC Symbol;Acc:HGNC:4041]	GO:0048786(presynaptic active zone);GO:0045177(apical part of cell);GO:0043025(neuronal cell body);GO:0032433(filopodium tip);GO:0030425(dendrite);GO:0030424(axon);GO:0016328(lateral plasma membrane);GO:0016324(apical plasma membrane);GO:0016021(integral component of membrane);GO:0016020(membrane);GO:0005886(plasma membrane);GO:0005737(cytoplasm);GO:1904938(planar cell polarity pathway involved i…	04310(Wnt signaling pathway);04390(Hippo signaling pathway);04550(Signaling pathways regulating pluripotency of stem cells);04916(Melanogenesis);05200(Pathways in cancer);05206(MicroRNAs in cancer);05205(Proteoglycans in cancer);05217(Basal cell carcinoma);05166(HTLV-I infection)
circRNA1111	507	499	514	327	323	493	402	505	368	143	409	218	11.2667	10.6855	10.8893	7.22543	7.62244	12.0208	9.7801	8.5274	8.3627	2.08396	5.75639	3.38026	chr14	24797606	24819269	-	12	circRNA	-	ENSSSCT00000024610	EP400	mRNA	chr14:24796245-24797605|chr14:24819269-24819759	E1A binding protein p400 [Source:HGNC Symbol;Acc:HGNC:11958]	GO:0035267(NuA4 histone acetyltransferase complex);GO:0016607(nuclear speck);GO:0000812(Swr1 complex);GO:0043968(histone H2A acetylation);GO:0043967(histone H4 acetylation);GO:0005524(ATP binding)	NA
circRNA1112	351.917	547.5	471.35	246.833	299.667	462.417	213.5	247.667	272.917	101.25	71.0833	121.75	39.164	58.7132	50.0076	27.3135	35.415	56.4648	26.0119	20.9435	31.0589	7.38933	5.01016	9.45408	chr14	30062323	30067011	+	3	circRNA	-	ENSSSCT00000010699	SCARB1	mRNA	chr14:30059201-30062322|chr14:30067011-30073184	scavenger receptor class B member 1 [Source:HGNC Symbol;Acc:HGNC:1664]	GO:0070062(extracellular exosome);GO:0043231(intracellular membrane-bounded organelle);GO:0016021(integral component of membrane);GO:0016020(membrane);GO:0009986(cell surface);GO:0005901(caveola);GO:0005887(integral component of plasma membrane);GO:0005886(plasma membrane);GO:0005765(lysosomal membrane);GO:0005737(cytoplasm);GO:0070508(cholesterol import);GO:0070328(triglyceride homeostasis);GO:0…	04145(Phagosome);04913(Ovarian Steroidogenesis);04976(Bile secretion);04975(Fat digestion and absorption);04977(Vitamin digestion and absorption);05160(Hepatitis C)
circRNA1113	45	19	32	17	49	10	46	28	20	29	1	13	8.82795	3.59175	5.98471	3.31606	10.2081	2.15251	9.87945	4.17389	4.01224	3.73086	0.124247	1.77948	chr14	31064919	31067257	-	2	circRNA	-	ENSSSCT00000010713	DDX55	mRNA	chr14:31063950-31064918|chr14:31067257-31071298	DEAD-box helicase 55 [Source:HGNC Symbol;Acc:HGNC:20085]	GO:0016020(membrane);GO:0005829(cytosol);GO:0005730(nucleolus);GO:0005634(nucleus);GO:0010501(RNA secondary structure unwinding);GO:0016787(hydrolase activity);GO:0005524(ATP binding);GO:0004386(helicase activity);GO:0004004(ATP-dependent RNA helicase activity);GO:0003723(RNA binding);GO:0003676(nucleic acid binding);GO:0000166(nucleotide binding)	NA
circRNA1114	12.8333	35.3333	43.1667	25	24.3333	33.3333	60	65.1667	64.8333	94.3333	125.333	78.3333	1.34984	3.58122	4.32848	2.61462	2.71797	3.84696	6.90908	5.20838	6.97347	6.50684	8.34921	5.74899	chr14	43179929	43188512	-	4	circRNA	-	ENSSSCT00000010867	SPPL3	mRNA	chr14:43172421-43179928|chr14:43188512-43217512	signal peptide peptidase like 3 [Source:HGNC Symbol;Acc:HGNC:30424]	GO:0071556(integral component of lumenal side of endoplasmic reticulum membrane);GO:0071458(integral component of cytoplasmic side of endoplasmic reticulum membrane);GO:0043231(intracellular membrane-bounded organelle);GO:0033116(endoplasmic reticulum-Golgi intermediate compartment membrane);GO:0030660(Golgi-associated vesicle membrane);GO:0016021(integral component of membrane);GO:0016020(membra…	NA
circRNA1115	232	220	159	153	187	148	449	602	507	374	484	258	27.3332	24.9764	17.8585	17.9234	23.3963	19.1321	57.9131	53.8933	61.0829	28.896	36.1148	21.2093	chr14	43857003	43863725	-	4	circRNA	-	ENSSSCT00000010883	MVK	mRNA	chr14:43853362-43857002|chr14:43863725-43867303	mevalonate kinase [Source:HGNC Symbol;Acc:HGNC:7530]	GO:0070062(extracellular exosome);GO:0005829(cytosol);GO:0005737(cytoplasm);GO:0050728(negative regulation of inflammatory response);GO:0019287(isopentenyl diphosphate biosynthetic process, mevalonate pathway);GO:0016310(phosphorylation);GO:0016126(sterol biosynthetic process);GO:0008299(isoprenoid biosynthetic process);GO:0008203(cholesterol metabolic process);GO:0008202(steroid metabolic proces…	00900(Terpenoid backbone biosynthesis);04146(Peroxisome)
circRNA1116	18	11	7.5	3	13.5	6	0	22.5	2.5	0	10	12	2.18162	1.28471	0.866589	0.361538	1.73757	0.797913	0	2.07217	0.309853	0	0.767616	1.01483	chr14	59598742	59602351	+	2	circRNA	-	ENSSSCT00000011115	LYST	mRNA	chr14:59597762-59598741|chr14:59602351-59603840	lysosomal trafficking regulator [Source:HGNC Symbol;Acc:HGNC:1968]	GO:0007040(lysosome organization);GO:0015630(microtubule cytoskeleton);GO:0043473(pigmentation);GO:0042267(natural killer cell mediated cytotoxicity);GO:0032510(endosome to lysosome transport via multivesicular body sorting pathway)	NA
circRNA1117	5.3	12.15	10.5	11.6	11.65	3.25	28.25	72.1	31.4	64.7	95	40.3	0.955314	2.11033	1.80428	2.079	2.22996	0.642763	5.57463	9.87509	5.78774	7.64782	10.845	5.06849	chr14	98553323	98554363	-	2	circRNA	-	ENSSSCT00000011383	NCOA4	mRNA	chr14:98551662-98553322|chr14:98554363-98555125	nuclear receptor coactivator 4 [Source:HGNC Symbol;Acc:HGNC:7671]	GO:0044754(autolysosome);GO:0006622(protein targeting to lysosome)	05200(Pathways in cancer);05216(Thyroid cancer)
circRNA1118	23	4	12	13	14	9	26	5	10	125	196	126	3.04105	0.509636	1.51259	1.70909	1.96574	1.30568	3.76354	0.502344	1.35209	10.8385	16.413	11.6244	chr14	122455302	122456060	-	2	circRNA	-	ENSSSCT00000011558	FBXW4	mRNA	chr14:122449243-122455301|chr14:122456060-122458909	F-box and WD repeat domain containing 4 [Source:HGNC Symbol;Acc:HGNC:10847]	GO:0019005(SCF ubiquitin ligase complex);GO:0060173(limb development);GO:0051216(cartilage development);GO:0042733(embryonic digit morphogenesis);GO:0031146(SCF-dependent proteasomal ubiquitin-dependent protein catabolic process);GO:0002053(positive regulation of mesenchymal cell proliferation)	NA
circRNA1119	32	36	38	19	26	46	50	84	66	43	28	39	2.43627	2.64109	2.75807	1.43832	2.10209	3.84266	4.16748	4.85949	5.13841	2.14688	1.35012	2.07178	chr14	131878915	131882008	+	4	circRNA	-	ENSSSCT00000011621	SMC3	mRNA	chr14:131878464-131878914|chr14:131882008-131883785	structural maintenance of chromosomes 3 [Source:HGNC Symbol;Acc:HGNC:2468]	GO:0034991(nuclear meiotic cohesin complex);GO:0030893(meiotic cohesin complex);GO:0016363(nuclear matrix);GO:0008278(cohesin complex);GO:0005737(cytoplasm);GO:0005694(chromosome);GO:0005654(nucleoplasm);GO:0005634(nucleus);GO:0000922(spindle pole);GO:0000800(lateral element);GO:0000785(chromatin);GO:0051276(chromosome organization);GO:0032876(negative regulation of DNA endoreduplication);GO:0019…	NA
circRNA112	99	102	63	48	64	49	69	91	74	252	201	140	12.3175	12.229	7.47261	5.93819	8.45606	6.68929	9.39859	8.60326	9.41514	20.5613	15.8387	12.154	chr4	103384379	103384842	+	2	circRNA	-	ENSSSCT00000007143	GBA	mRNA	chr4:103383496-103384378|chr4:103384842-103385592	glucosylceramidase beta [Source:HGNC Symbol;Acc:HGNC:4177]	GO:0070062(extracellular exosome);GO:0043202(lysosomal lumen);GO:0005765(lysosomal membrane);GO:0005615(extracellular space);GO:1905037(autophagosome organization);GO:1904925(positive regulation of mitophagy in response to mitochondrial depolarization);GO:1904457(positive regulation of neuronal action potential);GO:1903061(positive regulation of protein lipidation);GO:1903052(positive regulation …	00600(Sphingolipid metabolism);00511(Other glycan degradation);04142(Lysosome)
circRNA1120	169	140.5	112.5	49	122	161	57.5	138.5	64	0	20	8	32.5483	26.0749	20.6557	9.38349	24.9519	34.0224	12.1238	20.2688	12.6046	0	2.43955	1.07507	chr14	132256486	132256940	+	2	circRNA	-	ENSSSCT00000011623	PDCD4	mRNA	chr14:132252629-132256485|chr14:132256940-132258131	programmed cell death 4 [Source:HGNC Symbol;Acc:HGNC:8763]	GO:0005829(cytosol);GO:0005737(cytoplasm);GO:0005634(nucleus);GO:2000353(positive regulation of endothelial cell apoptotic process);GO:1904761(negative regulation of myofibroblast differentiation);GO:0045892(negative regulation of transcription, DNA-templated);GO:0007569(cell aging)	05206(MicroRNAs in cancer);05205(Proteoglycans in cancer)
circRNA1121	12	13	6	18	18	0	15	24	43	7	25	3	1.91718	2.00138	0.913858	2.85944	3.05391	0	2.62362	2.91359	7.02521	0.733404	2.52964	0.334431	chrX	16108943	16112710	+	2	circRNA	-	ENSSSCT00000033642	CDKL5	mRNA	chrX:16042871-16108942|chrX:16112710-16218863	cyclin dependent kinase like 5 [Source:HGNC Symbol;Acc:HGNC:11411]	GO:0032839(dendrite cytoplasm);GO:0005829(cytosol);GO:0005654(nucleoplasm);GO:0005634(nucleus);GO:0050773(regulation of dendrite development);GO:0046777(protein autophosphorylation);GO:0045773(positive regulation of axon extension);GO:0006468(protein phosphorylation);GO:0016301(kinase activity);GO:0005524(ATP binding);GO:0004674(protein serine/threonine kinase activity);GO:0004672(protein kinase …	NA
circRNA1122	4.33333	7	7.33333	3.83333	9.33333	8.33333	6.33333	12.6667	8.33333	21	28.3333	18.6667	0.609238	0.948348	0.982905	0.53588	1.39349	1.28553	0.97482	1.3532	1.1981	1.93619	2.5229	1.8312	chrX	19232020	19233575	-	2	circRNA	-	ENSSSCT00000033234	MBTPS2	mRNA	chrX:19223500-19232019|chrX:19233575-19241529	membrane bound transcription factor peptidase, site 2 [Source:HGNC Symbol;Acc:HGNC:15455]	GO:0016021(integral component of membrane);GO:0016020(membrane);GO:0006508(proteolysis);GO:0004222(metalloendopeptidase activity);GO:0005737(cytoplasm);GO:1990440(positive regulation of transcription from RNA polymerase II promoter in response to endoplasmic reticulum stress);GO:0051091(positive regulation of sequence-specific DNA binding transcription factor activity);GO:0036500(ATF6-mediated un…	04141(Protein processing in endoplasmic reticulum)
circRNA1123	9	27	16	18	15	43	13	17	2	0	0	0	1.30447	3.77104	2.21085	2.59413	2.3088	6.83847	2.06283	1.87231	0.296437	0	0	0	chrX	29457522	29461618	-	3	circRNA	-	ENSSSCT00000013350	DMD	mRNA	chrX:29437159-29457521|chrX:29461618-29466220	dystrophin [Source:RefSeq peptide;Acc:NP_001012408]	GO:0046872(metal ion binding);GO:0008270(zinc ion binding);GO:0003779(actin binding)	NA
circRNA1124	92	97	77	56	95	46	78	105	68	58	48.5	93	9.82374	9.9808	7.83836	5.9457	10.7724	5.38945	9.11824	8.51949	7.42517	4.06144	3.27995	6.92907	chrX	51812778	51813630	-	2	circRNA	-	ENSSSCT00000013481	HUWE1	mRNA	chrX:51809822-51812777|chrX:51813630-51816703	HECT, UBA and WWE domain containing 1, E3 ubiquitin protein ligase [Source:HGNC Symbol;Acc:HGNC:30892]	GO:0016567(protein ubiquitination);GO:0016740(transferase activity);GO:0004842(ubiquitin-protein transferase activity);GO:0016021(integral component of membrane);GO:0016020(membrane);GO:0070062(extracellular exosome);GO:0005829(cytosol);GO:0005737(cytoplasm);GO:0005654(nucleoplasm);GO:1903955(positive regulation of protein targeting to mitochondrion);GO:0016574(histone ubiquitination);GO:0006513(…	04120(Ubiquitin mediated proteolysis)
circRNA1125	124	157	166	60	102	208	216	368	249	293	49	73	24.2133	29.5418	30.9019	11.6496	21.1512	44.5649	46.1757	54.6029	49.7211	37.52	6.0599	9.94623	chrX	51889184	51899981	-	2	circRNA	-	ENSSSCT00000013481	HUWE1	mRNA	chrX:51886457-51889183|chrX:51899981-51902442	HECT, UBA and WWE domain containing 1, E3 ubiquitin protein ligase [Source:HGNC Symbol;Acc:HGNC:30892]	GO:0016567(protein ubiquitination);GO:0016740(transferase activity);GO:0004842(ubiquitin-protein transferase activity);GO:0016021(integral component of membrane);GO:0016020(membrane);GO:0070062(extracellular exosome);GO:0005829(cytosol);GO:0005737(cytoplasm);GO:0005654(nucleoplasm);GO:1903955(positive regulation of protein targeting to mitochondrion);GO:0016574(histone ubiquitination);GO:0006513(…	04120(Ubiquitin mediated proteolysis)
circRNA1126	48	53	40	39	23	2	36	49	43	81	145	57	7.38885	7.86169	5.87004	5.96934	3.7598	0.337803	6.06688	5.73148	6.76882	8.17681	14.1365	6.12229	chrX	66106168	66108914	+	2	circRNA	-	ENSSSCT00000013570	ENSSSCG00000012410	mRNA	chrX:66083090-66106167|None	NA	GO:0016575(histone deacetylation);GO:0016787(hydrolase activity);GO:0004407(histone deacetylase activity)	NA
circRNA1127	7.5	10	4	4	2	6	4	15	5	0	19.5	0	0.732257	0.940821	0.372313	0.388319	0.207364	0.642763	0.427553	1.11283	0.499208	0	1.2058	0	chrX	70495253	70498760	-	3	circRNA	-	ENSSSCT00000013595	ATRX	mRNA	chrX:70475483-70495252|chrX:70498760-70506112	ATRX, chromatin remodeler [Source:HGNC Symbol;Acc:HGNC:886]	GO:1990707(nuclear subtelomeric heterochromatin);GO:0070603(SWI/SNF superfamily-type complex);GO:0031933(telomeric heterochromatin);GO:0031618(nuclear pericentric heterochromatin);GO:0016605(PML body);GO:0016604(nuclear body);GO:0005721(pericentric heterochromatin);GO:0005654(nucleoplasm);GO:0005634(nucleus);GO:0000792(heterochromatin);GO:0000784(nuclear chromosome, telomeric region);GO:0000780(c…	NA
circRNA1128	12	23	23.5	5	40.5	34	25	41.5	12.6667	0	5	5	1.42574	2.63324	2.66177	0.590682	5.10992	4.43235	3.25181	3.74663	1.53897	0	0.37624	0.414506	chrX	85941401	85946304	+	3	circRNA	-	ENSSSCT00000013641	ENSSSCG00000012474	mRNA	chrX:85935529-85941400|chrX:85946304-85949860	NA	GO:0030036(actin cytoskeleton organization);GO:0016043(cellular component organization);GO:0007292(female gamete generation);GO:0007015(actin filament organization);GO:0017048(Rho GTPase binding);GO:0003779(actin binding)	NA
circRNA1129	15	12	23	19	37	10	32	9	28	36	15	29	1.71455	1.32174	2.5063	2.15943	4.49121	1.25417	4.0044	0.781696	3.27285	2.69852	1.0859	2.31292	chrX	115970997	115973795	-	4	circRNA	-	ENSSSCT00000013820	THOC2	mRNA	chrX:115967262-115970996|chrX:115973795-115976910	THO complex 2 [Source:HGNC Symbol;Acc:HGNC:19073]	GO:0000784(nuclear chromosome, telomeric region);GO:0000445(THO complex part of transcription export complex);GO:0000347(THO complex);GO:0000346(transcription export complex);GO:0048699(generation of neurons);GO:0048666(neuron development);GO:0046784(viral mRNA export from host cell nucleus);GO:0016973(poly(A)+ mRNA export from nucleus);GO:0006406(mRNA export from nucleus);GO:0003729(mRNA binding)	03040(Spliceosome);03013(RNA transport)
circRNA113	284.5	210	172	269	247	350	293.5	502.5	375.833	489	427	340	18.461	13.131	10.6401	17.3561	17.0205	24.9194	20.8501	24.7767	24.9389	20.8087	17.5484	15.3941	chr4	104287476	104289119	-	3	circRNA	-	ENSSSCT00000027198	ENSSSCG00000025849	mRNA	chr4:104286127-104287475|chr4:104289119-104293990	NA	NA	NA
circRNA1130	143	201	108	132	205	165	93	101	92	6	73	24	30.4619	41.2593	21.9326	27.959	46.3742	38.5658	21.6886	16.3485	20.0409	0.838176	9.84874	3.56726	chrX	121922443	121923027	+	2	circRNA	-	ENSSSCT00000036143	OCRL	mRNA	chrX:121913065-121922442|chrX:121923027-121923983	OCRL, inositol polyphosphate-5-phosphatase [Source:HGNC Symbol;Acc:HGNC:8108]	GO:0070062(extracellular exosome);GO:0030136(clathrin-coated vesicle);GO:0005886(plasma membrane);GO:0005802(trans-Golgi network);GO:0005769(early endosome);GO:0005737(cytoplasm);GO:0005634(nucleus);GO:0001750(photoreceptor outer segment);GO:0060271(cilium assembly);GO:0046856(phosphatidylinositol dephosphorylation);GO:0043547(positive regulation of GTPase activity);GO:0043087(regulation of GTPas…	00562(Inositol phosphate metabolism);04070(Phosphatidylinositol signaling system)
circRNA1131	24.8333	37.5	25.5	22.5833	39.3333	31.25	47	49.25	57.5833	31.5	23.5	32.5	4.91747	7.15554	4.81384	4.44653	8.27121	6.78975	10.189	7.41051	11.6604	4.09054	2.94721	4.49048	chrX	139941678	139946155	+	2	circRNA	-	ENSSSCT00000013931	MTM1	mRNA	chrX:139929821-139941677|chrX:139946155-139963481	myotubularin 1 [Source:HGNC Symbol;Acc:HGNC:7448]	GO:0070062(extracellular exosome);GO:0031674(I band);GO:0030175(filopodium);GO:0005886(plasma membrane);GO:0005829(cytosol);GO:0005770(late endosome);GO:0005737(cytoplasm);GO:0001726(ruffle);GO:1902902(negative regulation of autophagosome assembly);GO:0070584(mitochondrion morphogenesis);GO:0051898(negative regulation of protein kinase B signaling);GO:0048633(positive regulation of skeletal muscl…	00562(Inositol phosphate metabolism);04070(Phosphatidylinositol signaling system)
circRNA1132	903	1139.5	1783.5	635	880	1359	273	558	284.5	203.5	81.5	94.5	87.9601	106.959	165.621	61.5033	91.0296	145.25	29.1131	41.3017	28.3393	12.9995	5.02797	6.42293	chrX	144149375	144164127	-	2	circRNA	-	ENSSSCT00000014028	PRKX	mRNA	chrX:144147086-144149374|chrX:144164127-144164458	protein kinase, X-linked [Source:HGNC Symbol;Acc:HGNC:9441]	GO:0016021(integral component of membrane);GO:0016020(membrane);GO:0005737(cytoplasm);GO:0005634(nucleus);GO:2000696(regulation of epithelial cell differentiation involved in kidney development);GO:0060993(kidney morphogenesis);GO:0060562(epithelial tube morphogenesis);GO:0046777(protein autophosphorylation);GO:0043542(endothelial cell migration);GO:0031589(cell-substrate adhesion);GO:0030334(reg…	NA
circRNA1133	42.3333	26.05	28.95	16.6667	42.1333	28.3095	31.0833	29.5	27.75	8.75	20.75	20.8333	3.96786	2.35281	2.58683	1.55328	4.19374	2.91141	3.18954	2.10102	2.65978	0.53783	1.23177	1.3625	chr7	125461	130444	-	4	circRNA	-	ENSSSCT00000001075	EXOC2	mRNA	chr7:117119-125460|chr7:130444-137597	exocyst complex component 2 [Source:HGNC Symbol;Acc:HGNC:24968]	GO:0016020(membrane);GO:0000145(exocyst);GO:2000535(regulation of entry of bacterium into host cell);GO:0006893(Golgi to plasma membrane transport);GO:0001927(exocyst assembly);GO:0047485(protein N-terminus binding);GO:0019901(protein kinase binding);GO:0017160(Ral GTPase binding)	04014(Ras signaling pathway)
circRNA1134	12	20	45	4	4	16	22	8	24	0	0	0	2.92564	4.69867	10.4592	0.969675	1.03562	4.28013	5.87205	1.48206	5.98356	0	0	0	chr7	4872396	4875757	+	2	circRNA	-	ENSSSCT00000001117	RIOK1	mRNA	chr7:4871908-4872395|chr7:4875757-4876988	serine/threonine-protein kinase RIO1 [Source:RefSeq peptide;Acc:NP_001230616]	GO:0030688(preribosome, small subunit precursor);GO:2000234(positive regulation of rRNA processing);GO:0042274(ribosomal small subunit biogenesis);GO:0030490(maturation of SSU-rRNA);GO:0016310(phosphorylation);GO:0006468(protein phosphorylation);GO:0016740(transferase activity);GO:0016301(kinase activity);GO:0005524(ATP binding);GO:0004674(protein serine/threonine kinase activity);GO:0000166(nucl…	03008(Ribosome biogenesis in eukaryotes)
circRNA1135	13	0	0	3.5	1	4.5	35	25	10.5	24	0	0	0.751115	0	0	0.201075	0.0613571	0.285281	2.2139	1.09759	0.620385	0.909364	0	0	chr7	9881234	9904235	+	3	circRNA	-	ENSSSCT00000001146	PHACTR1	mRNA	chr7:9863429-9881233|chr7:9904235-9941963	phosphatase and actin regulator 1 [Source:HGNC Symbol;Acc:HGNC:20990]	GO:0005829(cytosol);GO:0005634(nucleus);GO:0050790(regulation of catalytic activity);GO:0048870(cell motility);GO:0043149(stress fiber assembly);GO:0043086(negative regulation of catalytic activity);GO:0031532(actin cytoskeleton reorganization);GO:0031032(actomyosin structure organization);GO:0019888(protein phosphatase regulator activity);GO:0008157(protein phosphatase 1 binding);GO:0004864(prot…	NA
circRNA1136	87	88.25	113	66.1667	91.6667	140	175.5	160	114.167	141	64	66.5	6.09549	5.95812	7.54768	4.60951	6.82029	10.7625	13.4615	8.51814	8.17971	6.47846	2.83992	3.25098	chr7	10028550	10041252	-	4	circRNA	-	ENSSSCT00000001147	TBC1D7	mRNA	chr7:10026989-10028549|chr7:10041252-10045313	TBC1 domain family member 7 [Source:HGNC Symbol;Acc:HGNC:21066]	GO:0036064(ciliary basal body);GO:0031410(cytoplasmic vesicle);GO:1902018(negative regulation of cilium assembly);GO:0090630(activation of GTPase activity);GO:0070848(response to growth factor);GO:0032007(negative regulation of TOR signaling);GO:0031398(positive regulation of protein ubiquitination);GO:0017137(Rab GTPase binding);GO:0005096(GTPase activator activity)	NA
circRNA1137	4.66667	0	3.66667	7.33333	9.33333	8	11	35.3333	18.6667	0	2.33333	0	0.878708	0	0.658195	1.37299	1.86628	1.65282	2.26756	5.05543	3.59429	0	0.278261	0	chr7	16478046	16480237	-	2	circRNA	-	ENSSSCT00000001173	MBOAT1	mRNA	chr7:16472340-16478045|chr7:16480237-16538563	membrane bound O-acyltransferase domain containing 1 [Source:HGNC Symbol;Acc:HGNC:21579]	GO:0016021(integral component of membrane);GO:0016020(membrane)	00561(Glycerolipid metabolism);00564(Glycerophospholipid metabolism)
circRNA1138	13.5	1.5	10	12.3333	5	9	12.5	18.5	20.6667	3.5	22	25.5	1.97709	0.211685	1.39617	1.79598	0.777616	1.44622	2.00415	2.05874	3.09509	0.336144	2.04058	2.60578	chr7	16831954	16834199	+	2	circRNA	-	ENSSSCT00000001175	CDKAL1	mRNA	chr7:16820846-16831953|chr7:16834199-16923591	CDK5 regulatory subunit associated protein 1 like 1 [Source:HGNC Symbol;Acc:HGNC:21050]	GO:0016021(integral component of membrane);GO:0016020(membrane);GO:0005791(rough endoplasmic reticulum);GO:0005783(endoplasmic reticulum);GO:1990145(maintenance of translational fidelity);GO:0043412(macromolecule modification);GO:0035600(tRNA methylthiolation);GO:0009451(RNA modification);GO:0051539(4 iron, 4 sulfur cluster binding);GO:0051536(iron-sulfur cluster binding);GO:0035598(N6-threonylca…	NA
circRNA1139	376.5	466.5	442	206.333	378	430	190.5	244.7	204.067	12.5	69	69.5	42.5738	50.8316	47.648	23.1992	45.3911	53.3511	23.583	21.0255	23.5971	0.926937	4.94155	5.48359	chr7	16831954	16923676	+	3	circRNA	-	ENSSSCT00000001175	CDKAL1	mRNA	chr7:16820846-16831953|chr7:16923676-16992241	CDK5 regulatory subunit associated protein 1 like 1 [Source:HGNC Symbol;Acc:HGNC:21050]	GO:0016021(integral component of membrane);GO:0016020(membrane);GO:0005791(rough endoplasmic reticulum);GO:0005783(endoplasmic reticulum);GO:1990145(maintenance of translational fidelity);GO:0043412(macromolecule modification);GO:0035600(tRNA methylthiolation);GO:0009451(RNA modification);GO:0051539(4 iron, 4 sulfur cluster binding);GO:0051536(iron-sulfur cluster binding);GO:0035598(N6-threonylca…	NA
circRNA114	284.5	218	172	269	248	350	293.5	502.5	375.833	489	427	340	18.461	13.6312	10.6401	17.3561	17.0894	24.9194	20.8501	24.7767	24.9389	20.8087	17.5484	15.3941	chr4	104405831	104407474	-	3	circRNA	-	ENSSSCT00000007178	ENSSSCG00000006553	mRNA	chr4:104404482-104405830|chr4:104407474-104412345	NA	GO:0005737(cytoplasm);GO:0005634(nucleus);GO:0061484(hematopoietic stem cell homeostasis);GO:0010628(positive regulation of gene expression)	NA
circRNA1140	260.833	271	357.333	156.167	215.75	262.5	138.167	214.617	148.817	81	49.8333	25.5	29.6535	29.6884	38.7285	17.6533	26.0474	32.7445	17.1966	18.5401	17.3011	6.03893	3.58814	2.02281	chr7	16992242	17106510	+	4	circRNA	-	ENSSSCT00000001175	CDKAL1	mRNA	chr7:16923676-16992241|chr7:17106510-17209020	CDK5 regulatory subunit associated protein 1 like 1 [Source:HGNC Symbol;Acc:HGNC:21050]	GO:0016021(integral component of membrane);GO:0016020(membrane);GO:0005791(rough endoplasmic reticulum);GO:0005783(endoplasmic reticulum);GO:1990145(maintenance of translational fidelity);GO:0043412(macromolecule modification);GO:0035600(tRNA methylthiolation);GO:0009451(RNA modification);GO:0051539(4 iron, 4 sulfur cluster binding);GO:0051536(iron-sulfur cluster binding);GO:0035598(N6-threonylca…	NA
circRNA1141	10.25	6.25	8.4	9.5	11	14.1667	9.58333	25.35	18.3857	5.25	33.5	13.9	1.65642	0.973263	1.29411	1.5265	1.88773	2.51195	1.69547	3.11286	3.03833	0.556376	3.42868	1.56734	chr7	21571926	21573043	+	2	circRNA	-	ENSSSCT00000001196	CARMIL1	mRNA	chr7:21561703-21571925|chr7:21573043-21583139	capping protein regulator and myosin 1 linker 1 [Source:HGNC Symbol;Acc:HGNC:21581]	GO:0070062(extracellular exosome);GO:0044354(macropinosome);GO:0031941(filamentous actin);GO:0031252(cell leading edge);GO:0030027(lamellipodium);GO:0016607(nuclear speck);GO:0005886(plasma membrane);GO:0005829(cytosol);GO:0005634(nucleus);GO:2000813(negative regulation of barbed-end actin filament capping);GO:1902745(positive regulation of lamellipodium organization);GO:1900026(positive regulati…	NA
circRNA1142	5	0	0	56	43	21	72	140	87	0	0	0	0.654938	0	0	7.29364	5.98137	3.01819	10.325	13.9346	11.6535	0	0	0	chr7	21868824	21869232	+	2	circRNA	-	ENSSSCT00000001203	SLC17A1	mRNA	chr7:21866441-21868823|chr7:21869232-21871071	solute carrier family 17 (organic anion transporter), member 1 [Source:HGNC Symbol;Acc:HGNC:10929]	GO:0016021(integral component of membrane);GO:0016020(membrane);GO:0005887(integral component of plasma membrane);GO:0055085(transmembrane transport);GO:0046415(urate metabolic process);GO:0035725(sodium ion transmembrane transport);GO:0035435(phosphate ion transmembrane transport);GO:0005436(sodium:phosphate symporter activity)	NA
circRNA1143	139	234	173.5	105	118	160	119	209	162	114	150	162	19.0969	30.9791	22.7244	14.3438	17.216	24.1193	17.8987	21.8187	22.76	10.2711	13.052	15.5298	chr7	27990199	27991803	-	3	circRNA	-	ENSSSCT00000001575	ATF6B	mRNA	chr7:27987140-27990198|chr7:27991803-27991949	activating transcription factor 6 beta [Source:HGNC Symbol;Acc:HGNC:2349]	GO:0012505(endomembrane system);GO:0005634(nucleus);GO:0030968(endoplasmic reticulum unfolded protein response);GO:0006357(regulation of transcription from RNA polymerase II promoter);GO:0006355(regulation of transcription, DNA-templated);GO:0043565(sequence-specific DNA binding);GO:0035497(cAMP response element binding);GO:0003700(transcription factor activity, sequence-specific DNA binding);GO:…	04141(Protein processing in endoplasmic reticulum);04668(TNF signaling pathway);04022(cGMP - PKG signaling pathway);04151(PI3K-Akt signaling pathway);04911(Insulin secretion);04915(Estrogen signaling pathway);04918(Thyroid hormone synthesis);04261(Adrenergic signaling in cardiomyocytes);04728(Dopaminergic synapse);05203(Viral carcinogenesis);05030(Cocaine addiction);05031(Amphetamine addiction);0…
circRNA1144	6.5	7	20.5	12	11.5	16	15	15.5	17.5	0	0	0	1.30551	1.35478	3.92524	2.39648	2.45282	3.52602	3.29826	2.36556	3.59429	0	0	0	chr7	32783248	32796907	-	2	circRNA	-	ENSSSCT00000001665	ENSSSCG00000001493	mRNA	chr7:32753507-32783247|chr7:32796907-32849469	DNA primase large subunit [Source:RefSeq peptide;Acc:NP_001231093]	GO:0005658(alpha DNA polymerase:primase complex);GO:0071897(DNA biosynthetic process);GO:0006269(DNA replication, synthesis of RNA primer);GO:0006260(DNA replication);GO:0051539(4 iron, 4 sulfur cluster binding);GO:0051536(iron-sulfur cluster binding);GO:0046872(metal ion binding);GO:0016779(nucleotidyltransferase activity);GO:0016740(transferase activity);GO:0003899(DNA-directed 5'-3' RNA polyme…	00230(Purine metabolism);00240(Pyrimidine metabolism);03030(DNA replication)
circRNA1145	157.867	189.333	178.333	121.892	145.183	124.233	157.05	333.2	216.542	91.5	67.7	62.6667	14.3194	16.5487	15.4209	10.9934	13.9847	12.3643	15.5955	22.9654	20.0855	5.44274	3.88919	3.96618	chr7	32849470	32966736	-	4	circRNA	-	ENSSSCT00000001665	ENSSSCG00000001493	mRNA	chr7:32796907-32849469|chr7:32966736-32969283	DNA primase large subunit [Source:RefSeq peptide;Acc:NP_001231093]	GO:0005658(alpha DNA polymerase:primase complex);GO:0071897(DNA biosynthetic process);GO:0006269(DNA replication, synthesis of RNA primer);GO:0006260(DNA replication);GO:0051539(4 iron, 4 sulfur cluster binding);GO:0051536(iron-sulfur cluster binding);GO:0046872(metal ion binding);GO:0016779(nucleotidyltransferase activity);GO:0016740(transferase activity);GO:0003899(DNA-directed 5'-3' RNA polyme…	00230(Purine metabolism);00240(Pyrimidine metabolism);03030(DNA replication)
circRNA1146	149	124	101	90	60	119	92	92	75	18	30	16	22.5252	18.0638	14.5562	13.5285	9.63241	19.7391	15.2264	10.5683	11.5945	1.7845	2.87237	1.68774	chr7	36582514	36591723	-	3	circRNA	-	ENSSSCT00000001732	SRPK1	mRNA	chr7:36577682-36582513|chr7:36591723-36602432	SRSF protein kinase 1 [Source:HGNC Symbol;Acc:HGNC:11305]	GO:0005886(plasma membrane);GO:0005829(cytosol);GO:0005737(cytoplasm);GO:0005634(nucleus);GO:0050684(regulation of mRNA processing);GO:0045071(negative regulation of viral genome replication);GO:0045070(positive regulation of viral genome replication);GO:0035556(intracellular signal transduction);GO:0016310(phosphorylation);GO:0007059(chromosome segregation);GO:0006468(protein phosphorylation);GO…	05168(Herpes simplex infection)
circRNA1147	49.6667	53.6667	48.6667	45.6667	50	45.3333	38.3333	50.6667	25	93	41	15	4.96408	5.16872	4.63714	4.53836	5.30695	4.97152	4.19447	3.84797	2.55519	6.09565	2.59534	1.04609	chr7	37462945	37463824	+	2	circRNA	-	ENSSSCT00000001748	C6orf89	mRNA	chr7:37451473-37462944|chr7:37463824-37471723	chromosome 6 open reading frame 89 [Source:HGNC Symbol;Acc:HGNC:21114]	GO:0030496(midbody);GO:0016021(integral component of membrane);GO:0016020(membrane);GO:0005886(plasma membrane);GO:0005737(cytoplasm);GO:0000139(Golgi membrane);GO:1901727(positive regulation of histone deacetylase activity);GO:0050673(epithelial cell proliferation);GO:0045787(positive regulation of cell cycle);GO:0042060(wound healing)	NA
circRNA1148	14	24	30	50	43	33	141	267	130	255	141	62	1.88656	3.11643	3.85397	6.69943	6.15335	4.87925	20.8012	27.3394	17.9141	22.5344	12.0337	5.82957	chr7	37937084	37938340	+	2	circRNA	-	ENSSSCT00000001758	ENSSSCG00000001579	mRNA	chr7:37936642-37937083|chr7:37938340-37958498	NA	GO:0080009(mRNA methylation);GO:0006370(7-methylguanosine mRNA capping);GO:0004483(mRNA (nucleoside-2'-O-)-methyltransferase activity);GO:0003676(nucleic acid binding)	NA
circRNA1149	253	216	263	117	175	250	575	550	586	383	235	158	55.8693	45.9633	55.3674	25.69	41.0386	60.5746	139.011	92.2892	132.33	55.4644	32.8668	24.3452	chr7	53606391	53608643	+	2	circRNA	-	ENSSSCT00000034669	MORF4L1	mRNA	chr7:53605904-53606390|chr7:53608643-53610358	mortality factor 4 like 1 [Source:HGNC Symbol;Acc:HGNC:16989]	GO:0005634(nucleus);GO:0006355(regulation of transcription, DNA-templated);GO:0006325(chromatin organization);GO:0035267(NuA4 histone acetyltransferase complex);GO:0016607(nuclear speck);GO:0016580(Sin3 complex);GO:0043968(histone H2A acetylation);GO:0043967(histone H4 acetylation);GO:0016575(histone deacetylation);GO:0008283(cell proliferation);GO:0006342(chromatin silencing);GO:0006338(chromati…	NA
circRNA115	71	62	18	17	34	32	40	53	42	0	62	69	13.2506	11.15	3.20255	3.15466	6.73842	6.55277	8.17269	7.51604	8.01559	0	7.32835	8.98525	chr4	104443530	104443842	+	2	circRNA	-	ENSSSCT00000007179	ENSSSCG00000006554	mRNA	chr4:104442219-104443529|chr4:104443842-104447001	NA	GO:0016021(integral component of membrane);GO:0016020(membrane);GO:0055114(oxidation-reduction process);GO:0016491(oxidoreductase activity)	NA
circRNA1150	24	31	43	41	47	25	41	37	35	0	24	0	3.11468	3.87676	5.32006	5.2907	6.47742	3.55992	5.82524	3.64871	4.64493	0	1.97265	0	chr7	57612079	57626098	-	2	circRNA	-	ENSSSCT00000002021	WHAMM	mRNA	chr7:57609962-57612078|chr7:57626098-57627192	WAS protein homolog associated with actin, golgi membranes and microtubules [Source:HGNC Symbol;Acc:HGNC:30493]	GO:0033116(endoplasmic reticulum-Golgi intermediate compartment membrane);GO:0005829(cytosol);GO:0000139(Golgi membrane);GO:0097320(plasma membrane tubulation);GO:0090527(actin filament reorganization);GO:0051127(positive regulation of actin nucleation);GO:0048041(focal adhesion assembly);GO:0034314(Arp2/3 complex-mediated actin nucleation);GO:0030032(lamellipodium assembly);GO:0007050(cell cycle…	NA
circRNA1151	0	0	5	10	0	0	0	0	0	0	0	0	0	0	1.22591	2.55722	0	0	0	0	0	0	0	0	chr7	58796812	58796975	+	1	circRNA	-	ENSSSCT00000002046	CFAP100	mRNA	chr7:58796742-58796811|chr7:58796975-58797269	cilia and flagella associated protein 100 [Source:HGNC Symbol;Acc:HGNC:26842]	NA	NA
circRNA1152	1	6	7.5	7.5	10.1667	17.5	42	51.3333	30.6667	9.5	2.5	5	0.12155	0.702769	0.869087	0.906451	1.31231	2.33395	5.58899	4.74124	3.81182	0.757257	0.192457	0.424062	chr7	59846973	59851023	+	2	circRNA	-	ENSSSCT00000002059	FANCI	mRNA	chr7:59846083-59846972|chr7:59851023-59851635	Fanconi anemia complementation group I [Source:HGNC Symbol;Acc:HGNC:25568]	GO:0016020(membrane);GO:0005829(cytosol);GO:0005654(nucleoplasm);GO:0031398(positive regulation of protein ubiquitination);GO:0007095(mitotic G2 DNA damage checkpoint);GO:0006281(DNA repair);GO:0070182(DNA polymerase binding)	03460(Fanconi anemia pathway)
circRNA1153	31.1667	46.5	61.3333	28.6667	23.3333	53.5	91.8333	152.167	86.8333	136	155.667	68.3333	4.30999	6.19646	8.0859	3.94176	3.42661	8.11778	13.9032	15.9897	12.2795	12.3336	13.6339	6.59359	chr7	60544561	60544948	-	2	circRNA	-	ENSSSCT00000002075	IDH2	mRNA	chr7:60543228-60544560|chr7:60544948-60546647	isocitrate dehydrogenase [Source:RefSeq peptide;Acc:NP_001157479]	GO:0070062(extracellular exosome);GO:0005829(cytosol);GO:0005777(peroxisome);GO:0005743(mitochondrial inner membrane);GO:0005739(mitochondrion);GO:0055114(oxidation-reduction process);GO:0006102(isocitrate metabolic process);GO:0006099(tricarboxylic acid cycle);GO:0051287(NAD binding);GO:0046872(metal ion binding);GO:0016616(oxidoreductase activity, acting on the CH-OH group of donors, NAD or NAD…	01200(Carbon metabolism);01210(2-Oxocarboxylic acid metabolism);01230(Biosynthesis of amino acids);00020(Citrate cycle (TCA cycle));00480(Glutathione metabolism);04146(Peroxisome)
circRNA1154	22	10	13.5	10.25	15.5	21	46.5	67.25	29.75	0	25	10	2.97409	1.30268	1.73985	1.37779	2.22518	3.11493	6.88195	6.90811	4.1127	0	2.14047	0.943267	chr7	60959606	60962443	+	3	circRNA	-	ENSSSCT00000002087	ETFA	mRNA	chr7:60946412-60959605|chr7:60962443-60967185	electron transfer flavoprotein alpha subunit [Source:HGNC Symbol;Acc:HGNC:3481]	GO:0070062(extracellular exosome);GO:0033539(fatty acid beta-oxidation using acyl-CoA dehydrogenase);GO:0050660(flavin adenine dinucleotide binding);GO:0016491(oxidoreductase activity);GO:0009055(electron carrier activity)	NA
circRNA1155	87.6667	52.3333	68.8333	40.25	37.5	52.6667	126.833	162.583	99.4167	27.6667	53.3333	19.6667	7.06999	4.06694	5.29211	3.22758	3.21157	4.66034	11.1981	9.96313	8.19884	1.4632	2.72408	1.10667	chr7	60959606	60968464	+	5	circRNA	-	ENSSSCT00000002087	ETFA	mRNA	chr7:60946412-60959605|chr7:60968464-60969384	electron transfer flavoprotein alpha subunit [Source:HGNC Symbol;Acc:HGNC:3481]	GO:0070062(extracellular exosome);GO:0033539(fatty acid beta-oxidation using acyl-CoA dehydrogenase);GO:0050660(flavin adenine dinucleotide binding);GO:0016491(oxidoreductase activity);GO:0009055(electron carrier activity)	NA
circRNA1156	52	3	3	13	6	9	0	16	16	59	92	0	9.1768	0.510169	0.504725	2.28117	1.12445	1.74272	0	2.14557	2.88747	6.82815	10.2828	0	chr7	63319985	63322300	+	2	circRNA	-	ENSSSCT00000027931	COX5A	mRNA	chr7:63312186-63319984|chr7:63322300-63328125	cytochrome c oxidase subunit 5A [Source:HGNC Symbol;Acc:HGNC:2267]	GO:0070062(extracellular exosome);GO:0043209(myelin sheath);GO:0005751(mitochondrial respiratory chain complex IV);GO:0005743(mitochondrial inner membrane);GO:0005739(mitochondrion);GO:1902600(hydrogen ion transmembrane transport);GO:0006123(mitochondrial electron transport, cytochrome c to oxygen);GO:0004129(cytochrome-c oxidase activity)	00190(Oxidative phosphorylation);04260(Cardiac muscle contraction);05010(Alzheimer's disease);05012(Parkinson's disease);05016(Huntington's disease);04932(Non-alcoholic fatty liver disease (NAFLD))
circRNA1157	27.5	13	44	32	27	48	40.5	66	67	93.5	60	80	2.18436	0.995038	3.33188	2.52736	2.27749	4.18341	3.52187	3.98356	5.44221	4.87042	3.01842	4.43389	chr7	63538957	63542549	+	2	circRNA	-	ENSSSCT00000002132	EDC3	mRNA	chr7:63517455-63538956|chr7:63542549-63556777	enhancer of mRNA decapping 3 [Source:HGNC Symbol;Acc:HGNC:26114]	GO:0016020(membrane);GO:0000932(P-body);GO:0090502(RNA phosphodiester bond hydrolysis, endonucleolytic);GO:0033962(cytoplasmic mRNA processing body assembly);GO:0031087(deadenylation-independent decapping of nuclear-transcribed mRNA);GO:1990174(phosphodiesterase decapping endonuclease activity);GO:0042802(identical protein binding);GO:0003729(mRNA binding)	03018(RNA degradation)
circRNA1158	250.5	229	376	209.5	193	289.5	326.5	363	280.5	117	208.5	89	25.1562	22.1604	35.9973	20.9193	20.5824	31.8994	35.8961	27.6999	28.8057	7.70523	13.2611	6.23634	chr7	65184011	65192947	+	5	circRNA	-	ENSSSCT00000002151	ENSSSCG00000001922	mRNA	chr7:65168587-65184010|chr7:65192947-65196659	NA	GO:0005737(cytoplasm);GO:0000151(ubiquitin ligase complex);GO:0042787(protein ubiquitination involved in ubiquitin-dependent protein catabolic process);GO:0032436(positive regulation of proteasomal ubiquitin-dependent protein catabolic process);GO:0016567(protein ubiquitination);GO:0000209(protein polyubiquitination);GO:0061630(ubiquitin protein ligase activity);GO:0046872(metal ion binding);GO:0…	NA
circRNA1159	42	50.5	40.5	50	33.5	65	58.5	53.5	46	84.5	76	47.5	3.52182	4.08051	3.23756	4.16883	2.98308	5.98038	5.37033	3.40885	3.94443	4.64663	4.03616	2.77917	chr7	73282517	73287920	+	3	circRNA	-	ENSSSCT00000002204	HECTD1	mRNA	chr7:73281222-73282516|chr7:73287920-73289654	HECT domain E3 ubiquitin protein ligase 1 [Source:HGNC Symbol;Acc:HGNC:20157]	GO:0016567(protein ubiquitination);GO:0046872(metal ion binding);GO:0016740(transferase activity);GO:0004842(ubiquitin-protein transferase activity)	NA
circRNA116	30	4	31	14	18	31	48	30	24	60	40	132	5.12283	0.658194	5.04657	2.37708	3.2641	5.80829	8.97341	3.89265	4.19092	6.71898	4.326	15.7277	chr4	107748690	107750120	+	2	circRNA	-	ENSSSCT00000007286	GOLPH3L	mRNA	chr4:107721557-107748689|chr4:107750120-107756332	golgi phosphoprotein 3 like [Source:HGNC Symbol;Acc:HGNC:24882]	GO:0031985(Golgi cisterna);GO:0005829(cytosol);GO:0005802(trans-Golgi network);GO:0000139(Golgi membrane);GO:0050714(positive regulation of protein secretion);GO:0048194(Golgi vesicle budding);GO:0043001(Golgi to plasma membrane protein transport);GO:0007030(Golgi organization);GO:0006890(retrograde vesicle-mediated transport, Golgi to ER);GO:0070273(phosphatidylinositol-4-phosphate binding)	05202(Transcriptional misregulation in cancers)
circRNA1160	90	94	64	41	37	107	42	96	69	37	45	21	10.4574	10.5248	7.08932	4.73685	4.56544	13.6415	5.34264	8.47591	8.19855	2.81932	3.31153	1.70256	chr7	80416946	80417483	-	3	circRNA	-	ENSSSCT00000002241	ENSSSCG00000002003	mRNA	chr7:80414882-80416945|chr7:80417483-80420330	NA	GO:0071797(LUBAC complex);GO:0035631(CD40 receptor complex);GO:0009898(cytoplasmic side of plasma membrane);GO:0005829(cytosol);GO:0060546(negative regulation of necroptotic process);GO:0043123(positive regulation of I-kappaB kinase/NF-kappaB signaling);GO:0023035(CD40 signaling pathway);GO:0016567(protein ubiquitination);GO:0046872(metal ion binding);GO:0008270(zinc ion binding);GO:0004842(ubiqu…	NA
circRNA1161	7.2	16.4	15.4667	16.2	11.0333	8.4	14.5	26.9	18.6667	24.6	9.2	11.2	1.08072	2.37207	2.21321	2.4178	1.75869	1.38343	2.38273	3.06809	2.8652	2.42146	0.87459	1.17301	chr7	91949364	91950519	-	2	circRNA	-	ENSSSCT00000002524	CHD2	mRNA	chr7:91939138-91949363|chr7:91950519-91952611	chromodomain helicase DNA binding protein 2 [Source:HGNC Symbol;Acc:HGNC:1917]	GO:0070062(extracellular exosome);GO:0043231(intracellular membrane-bounded organelle);GO:0005730(nucleolus);GO:0005654(nucleoplasm);GO:0005634(nucleus);GO:0060218(hematopoietic stem cell differentiation);GO:0007517(muscle organ development);GO:0006974(cellular response to DNA damage stimulus);GO:0006355(regulation of transcription, DNA-templated);GO:0042393(histone binding);GO:0005524(ATP bindin…	NA
circRNA1162	157	178	123	58	66	58	107	157	163	0	7	52	17.2897	18.8891	12.9133	6.35099	7.7185	7.0083	12.9003	13.1378	18.3562	0	0.488228	3.99571	chr7	91964457	91969641	-	3	circRNA	-	ENSSSCT00000002524	CHD2	mRNA	chr7:91962447-91964456|chr7:91969641-91976024	chromodomain helicase DNA binding protein 2 [Source:HGNC Symbol;Acc:HGNC:1917]	GO:0070062(extracellular exosome);GO:0043231(intracellular membrane-bounded organelle);GO:0005730(nucleolus);GO:0005654(nucleoplasm);GO:0005634(nucleus);GO:0060218(hematopoietic stem cell differentiation);GO:0007517(muscle organ development);GO:0006974(cellular response to DNA damage stimulus);GO:0006355(regulation of transcription, DNA-templated);GO:0042393(histone binding);GO:0005524(ATP bindin…	NA
circRNA1163	240	149	160.667	99.3333	119	92	53	118.786	62	62	5	14	19.2082	11.4912	12.2588	7.90491	10.114	8.07906	4.64386	7.22396	5.0743	3.2541	0.253444	0.78182	chr7	95851228	95940703	+	2	circRNA	-	ENSSSCT00000002542	FUT8	mRNA	None|chr7:95940703-95991163	fucosyltransferase 8 [Source:HGNC Symbol;Acc:HGNC:4019]	GO:0070062(extracellular exosome);GO:0032580(Golgi cisterna membrane);GO:0016021(integral component of membrane);GO:0016020(membrane);GO:0005829(cytosol);GO:0005794(Golgi apparatus);GO:1900407(regulation of cellular response to oxidative stress);GO:0046368(GDP-L-fucose metabolic process);GO:0043112(receptor metabolic process);GO:0036071(N-glycan fucosylation);GO:0033578(protein glycosylation in G…	00510(N-Glycan biosynthesis);00533(Glycosaminoglycan biosynthesis - keratan sulfate);05202(Transcriptional misregulation in cancers)
circRNA1164	31.75	48.25	49.4667	24.25	22.1667	36.3611	26.5	36.45	41.3333	30	24	6	7.52332	11.0171	11.1744	5.71353	5.57787	9.45368	6.87447	6.56295	10.0156	4.66177	3.60176	0.99202	chr7	97005367	97058377	+	2	circRNA	-	ENSSSCT00000002545	GPHN	mRNA	chr7:96982431-97005366|chr7:97058377-97101218	gephyrin [Source:RefSeq peptide;Acc:NP_001230231]	GO:0045211(postsynaptic membrane);GO:0030425(dendrite);GO:0005737(cytoplasm);GO:0097112(gamma-aminobutyric acid receptor clustering);GO:0072579(glycine receptor clustering);GO:0032324(molybdopterin cofactor biosynthetic process);GO:0018315(molybdenum incorporation into molybdenum-molybdopterin complex);GO:0006777(Mo-molybdopterin cofactor biosynthetic process);GO:0061599(molybdopterin molybdotran…	04727(GABAergic synapse)
circRNA1165	11.5	3	6.5	10.5	5	0	0	26.5	2.5	12.5	0	9	2.00433	0.503845	1.08001	1.81964	0.925428	0	0	3.50955	0.445574	1.42871	0	1.0945	chr7	97414024	97414957	+	2	circRNA	-	ENSSSCT00000030998	EIF2S1	mRNA	chr7:97412363-97414023|chr7:97414957-97416625	eukaryotic translation initiation factor 2 subunit alpha [Source:HGNC Symbol;Acc:HGNC:3265]	GO:0070062(extracellular exosome);GO:0016020(membrane);GO:0010494(cytoplasmic stress granule);GO:0005851(eukaryotic translation initiation factor 2B complex);GO:0005850(eukaryotic translation initiation factor 2 complex);GO:0005737(cytoplasm);GO:0005634(nucleus);GO:1901216(positive regulation of neuron death);GO:0046777(protein autophosphorylation);GO:0043558(regulation of translational initiatio…	03013(RNA transport);04141(Protein processing in endoplasmic reticulum);04932(Non-alcoholic fatty liver disease (NAFLD));05162(Measles);05164(Influenza A);05160(Hepatitis C);05168(Herpes simplex infection)
circRNA1166	50	25	57	38	17	40	38	29	34	0	23	37	6.09509	2.93667	6.62415	4.60596	2.2007	5.35017	5.07132	2.68623	4.23836	0	1.77572	3.14713	chr7	97854902	97855934	-	2	circRNA	-	ENSSSCT00000002559	ZFYVE26	mRNA	chr7:97853857-97854901|chr7:97855934-97857712	zinc finger FYVE-type containing 26 [Source:HGNC Symbol;Acc:HGNC:20761]	GO:0030496(midbody);GO:0005813(centrosome);GO:0005765(lysosomal membrane);GO:0000910(cytokinesis);GO:0000724(double-strand break repair via homologous recombination);GO:0046872(metal ion binding);GO:0032266(phosphatidylinositol-3-phosphate binding)	NA
circRNA1167	78	96	100	48	33	94	131	158	79	89	59	64	9.16402	10.8684	11.2005	5.60737	4.11725	12.1176	16.8496	14.1054	9.49134	6.85717	4.39016	5.24656	chr7	100799295	100803845	+	3	circRNA	-	ENSSSCT00000002593	PCNX1	mRNA	chr7:100795613-100799294|chr7:100803845-100804522	pecanex homolog 1 (Drosophila) [Source:HGNC Symbol;Acc:HGNC:19740]	GO:0016021(integral component of membrane);GO:0016020(membrane)	NA
circRNA1168	93	109	48	21	53	67	123	104	101	62	32	28	18.16	20.5099	8.9355	4.07735	10.9903	14.355	26.2945	15.4312	20.168	7.93939	3.95748	3.81499	chr7	100829566	100829781	+	1	circRNA	-	ENSSSCT00000002593	PCNX1	mRNA	chr7:100827122-100829565|chr7:100829781-100834599	pecanex homolog 1 (Drosophila) [Source:HGNC Symbol;Acc:HGNC:19740]	GO:0016021(integral component of membrane);GO:0016020(membrane)	NA
circRNA1169	116.083	106.233	138.917	99.1667	117.083	123.083	109.083	113.983	125.667	39.6667	21.4167	17.6	11.36	10.0178	12.9601	9.64941	12.1676	13.2162	11.6868	8.4759	12.5759	2.54564	1.32739	1.20178	chr7	102315541	102331206	+	3	circRNA	-	ENSSSCT00000002603	PSEN1	mRNA	chr7:102305995-102315540|chr7:102331206-102337720	NA	GO:0048471(perinuclear region of cytoplasm);GO:0043025(neuronal cell body);GO:0030018(Z disc);GO:0016021(integral component of membrane);GO:0016020(membrane);GO:0005887(integral component of plasma membrane);GO:0005794(Golgi apparatus);GO:0005790(smooth endoplasmic reticulum);GO:0005789(endoplasmic reticulum membrane);GO:0005783(endoplasmic reticulum);GO:0005634(nucleus);GO:0000139(Golgi membrane…	04310(Wnt signaling pathway);04330(Notch signaling pathway);04722(Neurotrophin signaling pathway);05010(Alzheimer's disease)
circRNA117	91.5	139.667	163	161.833	120.167	148.083	166.5	174.667	158.333	202.833	264.667	161.5	12.2907	18.0781	20.8732	21.6148	17.1412	21.8253	24.4849	17.828	21.7489	17.8673	22.5161	15.1367	chr4	109156043	109179026	+	3	circRNA	-	ENSSSCT00000023878	ENSSSCG00000025632	mRNA	chr4:109134839-109156042|chr4:109179026-109206121	NA	GO:0005829(cytosol);GO:0043161(proteasome-mediated ubiquitin-dependent protein catabolic process);GO:0042787(protein ubiquitination involved in ubiquitin-dependent protein catabolic process);GO:0000209(protein polyubiquitination);GO:0061630(ubiquitin protein ligase activity);GO:0008270(zinc ion binding)	NA
circRNA1170	30	5	10	19	42.5	7	14	10	25	9	0	0	2.50067	0.401615	0.794659	1.57476	3.76206	0.640223	1.27759	0.63339	2.131	0.491973	0	0	chr7	102941796	102945740	+	3	circRNA	-	ENSSSCT00000002615	ENSSSCG00000002351	mRNA	chr7:102939205-102941795|chr7:102945740-102946828	NA	GO:0005739(mitochondrion);GO:0055114(oxidation-reduction process)	NA
circRNA1171	34.5	34.1667	21	36	19.1667	40.1667	13.5	43.5	32.5	87.8333	29.5	70.5	5.36952	5.12418	3.11588	5.57116	3.16785	6.8593	2.30027	5.14448	5.1726	8.96477	2.90788	7.65613	chr7	104138883	104139655	-	2	circRNA	-	ENSSSCT00000002648	NEK9	mRNA	chr7:104134141-104138882|chr7:104139655-104142575	NIMA related kinase 9 [Source:HGNC Symbol;Acc:HGNC:18591]	GO:0006468(protein phosphorylation);GO:0019901(protein kinase binding);GO:0005524(ATP binding);GO:0004672(protein kinase activity)	NA
circRNA1172	36.1667	48.25	52.2333	26.5833	26.95	28.8333	26.5333	24	32.5	22.0833	39.3333	22.5	4.30915	5.53968	5.93302	3.14933	3.40991	3.76943	3.461	2.17285	3.95982	1.72548	2.96811	1.87055	chr7	118931849	118942907	-	4	circRNA	-	ENSSSCT00000002706	ENSSSCG00000002436	mRNA	chr7:118929040-118931848|chr7:118942907-118944264	NA	NA	NA
circRNA1173	0	0	0	11	14	19	8	73	32	0	0	0	0	0	0	1.2536	1.70399	2.3894	1.00382	6.35765	3.75057	0	0	0	chr7	122497132	122500139	+	3	circRNA	-	ENSSSCT00000002748	PPP4R4	mRNA	chr7:122495615-122497131|chr7:122500139-122501450	protein phosphatase 4 regulatory subunit 4 [Source:HGNC Symbol;Acc:HGNC:23788]	GO:0008287(protein serine/threonine phosphatase complex);GO:0005829(cytosol);GO:0005737(cytoplasm);GO:0080163(regulation of protein serine/threonine phosphatase activity);GO:0032515(negative regulation of phosphoprotein phosphatase activity);GO:0019888(protein phosphatase regulator activity)	NA
circRNA1174	27	37	50	55	66	43	27	50	39	171	105	63	4.15623	5.48835	7.33755	8.4183	10.789	7.26276	4.55016	5.84845	6.13916	17.2621	10.2367	6.76674	chr7	130879957	130880371	-	2	circRNA	-	ENSSSCT00000002830	ENSSSCG00000002547	mRNA	chr7:130876927-130879956|chr7:130880371-130882991	NA	GO:0005871(kinesin complex);GO:0003777(microtubule motor activity)	05132(Salmonella infection)
circRNA1175	0	0	0	2	6.5	4.5	8.33333	11.5	4.16667	0	0	0	0	0	0	0.15113	0.524576	0.375235	0.693329	0.664089	0.32381	0	0	0	chr7	131067765	131080519	+	6	circRNA	-	ENSSSCT00000002836	TDRD9	mRNA	chr7:131064036-131067764|chr7:131080519-131082590	tudor domain containing 9 [Source:HGNC Symbol;Acc:HGNC:20122]	GO:0071547(piP-body);GO:0043186(P granule);GO:0005739(mitochondrion);GO:0005634(nucleus);GO:0043046(DNA methylation involved in gamete generation);GO:0034587(piRNA metabolic process);GO:0009566(fertilization);GO:0007283(spermatogenesis);GO:0007140(male meiosis);GO:0006396(RNA processing);GO:0016787(hydrolase activity);GO:0005524(ATP binding);GO:0004386(helicase activity);GO:0004004(ATP-dependent …	NA
circRNA1176	159	112	124.5	108	79.5	57	454.5	714	377.833	500	417	337	16.0823	10.9162	12.0051	10.8618	8.53923	6.3259	50.3282	54.8762	39.0804	33.1652	26.713	23.7839	chr6	4228837	4232617	-	2	circRNA	-	ENSSSCT00000002958	ZDHHC7	mRNA	chr6:4219948-4228836|None	zinc finger DHHC-type containing 7 [Source:HGNC Symbol;Acc:HGNC:18459]	GO:0016021(integral component of membrane);GO:0016020(membrane);GO:0005794(Golgi apparatus);GO:0018345(protein palmitoylation);GO:0018230(peptidyl-L-cysteine S-palmitoylation);GO:0019706(protein-cysteine S-palmitoyltransferase activity);GO:0016746(transferase activity, transferring acyl groups);GO:0016740(transferase activity);GO:0016409(palmitoyltransferase activity);GO:0008270(zinc ion binding)	NA
circRNA1177	0	2	4	15	8	16	10	18	17	0	0	0	0	0.242648	0.480116	1.87784	1.06963	2.21034	1.37838	1.72206	2.18876	0	0	0	chr6	15082862	15083333	-	2	circRNA	-	ENSSSCT00000003049	ZFHX3	mRNA	chr6:15072861-15082861|chr6:15083333-15103351	zinc finger homeobox 3 [Source:HGNC Symbol;Acc:HGNC:777]	GO:0016604(nuclear body);GO:0005737(cytoplasm);GO:0005667(transcription factor complex);GO:0005654(nucleoplasm);GO:0005634(nucleus);GO:0071559(response to transforming growth factor beta);GO:0045893(positive regulation of transcription, DNA-templated);GO:0006355(regulation of transcription, DNA-templated);GO:0000122(negative regulation of transcription from RNA polymerase II promoter);GO:0046872(…	04550(Signaling pathways regulating pluripotency of stem cells)
circRNA1178	19.25	13	12.75	18.5	15.5	18.5	56.75	61.5	32.5	307.75	309.75	185.25	2.46786	1.60597	1.55828	2.35824	2.1102	2.60231	7.96496	5.99102	4.26071	25.8733	25.15	16.5711	chr6	32376629	32383981	-	3	circRNA	-	ENSSSCT00000003145	PHKB	mRNA	chr6:32371990-32376628|chr6:32383981-32408636	phosphorylase kinase regulatory subunit beta [Source:HGNC Symbol;Acc:HGNC:8927]	GO:0005964(phosphorylase kinase complex);GO:0006468(protein phosphorylation);GO:0005977(glycogen metabolic process);GO:0005516(calmodulin binding);GO:0003824(catalytic activity);GO:0004689(phosphorylase kinase activity)	NA
circRNA1179	11	27	22	11	5	49	44	36	25	0	9	36	1.78445	4.22067	3.40236	1.77432	0.86136	8.7218	7.81435	4.43763	4.14726	0	0.924682	4.07491	chr6	39500462	39507506	-	2	circRNA	-	ENSSSCT00000003177	ENSSSCG00000002875	mRNA	chr6:39489236-39500461|chr6:39507506-39509174	NA	GO:0005737(cytoplasm)	NA
circRNA118	18	14	3	34.3333	34.6667	40.3333	71.6667	104.667	68.3333	91.3333	143.667	143	3.58115	2.684	0.569006	6.79192	7.32427	8.80464	15.6097	15.8232	13.9025	11.9163	18.1027	19.8513	chr4	109178815	109179026	+	1	circRNA	-	ENSSSCT00000023878	ENSSSCG00000025632	mRNA	chr4:109160638-109178814|chr4:109179026-109206121	NA	GO:0005829(cytosol);GO:0043161(proteasome-mediated ubiquitin-dependent protein catabolic process);GO:0042787(protein ubiquitination involved in ubiquitin-dependent protein catabolic process);GO:0000209(protein polyubiquitination);GO:0061630(ubiquitin protein ligase activity);GO:0008270(zinc ion binding)	NA
circRNA1180	78	61	114	67	88	76	59	78	75	58	109	86	10.7513	8.10213	14.9801	9.1826	12.881	11.4941	8.90316	8.16948	10.5715	5.24271	9.51542	8.27116	chr6	47421800	47422794	-	2	circRNA	-	ENSSSCT00000003432	SYMPK	mRNA	chr6:47420668-47421799|chr6:47422794-47427852	symplekin [Source:HGNC Symbol;Acc:HGNC:22935]	GO:0097165(nuclear stress granule);GO:0005886(plasma membrane);GO:0005829(cytosol);GO:0005737(cytoplasm);GO:0005654(nucleoplasm);GO:0035307(positive regulation of protein dephosphorylation);GO:0006378(mRNA polyadenylation)	03015(mRNA surveillance pathway);04530(Tight junction)
circRNA1181	47	39	15	45	18	52	27	27	16	9	7	30	3.87939	3.10195	1.18033	3.69321	1.57775	4.7094	2.43981	1.69342	1.3505	0.487159	0.365932	1.72778	chr6	48956998	48961730	+	2	circRNA	-	ENSSSCT00000025210	EHD2	mRNA	chr6:48956212-48956997|chr6:48961730-48967048	EH domain containing 2 [Source:HGNC Symbol;Acc:HGNC:3243]	GO:0070062(extracellular exosome);GO:0055038(recycling endosome membrane);GO:0048471(perinuclear region of cytoplasm);GO:0045171(intercellular bridge);GO:0019898(extrinsic component of membrane);GO:0016020(membrane);GO:0015630(microtubule cytoskeleton);GO:0005901(caveola);GO:0005886(plasma membrane);GO:0005829(cytosol);GO:2001137(positive regulation of endocytic recycling);GO:1901741(positive reg…	04144(Endocytosis)
circRNA1182	218	223	294	192	190	114	347	502	420	265	222	208	45.974	45.3175	59.1083	40.2609	42.5512	26.379	80.1148	80.4443	90.5762	36.6493	29.6515	30.6071	chr6	49545216	49546595	-	2	circRNA	-	ENSSSCT00000003477	ENSSSCG00000003136	mRNA	chr6:49544481-49545215|chr6:49546595-49548118	NA	GO:0043547(positive regulation of GTPase activity);GO:0032012(regulation of ARF protein signal transduction);GO:0005086(ARF guanyl-nucleotide exchange factor activity)	04144(Endocytosis)
circRNA1183	12.3333	0.5	0	69.75	105	144.5	292.917	420.583	310.667	3	8.25	4.5	0.76387	0.029841	0	4.29546	6.90605	9.81984	19.8614	19.7937	19.6763	0.121849	0.323616	0.194471	chr6	53717960	53723446	-	4	circRNA	-	ENSSSCT00000003650	ENSSSCG00000003286	mRNA	chr6:53714191-53717959|chr6:53723446-53731309	NA	GO:0005524(ATP binding);GO:0000166(nucleotide binding)	NA
circRNA1184	25.3333	0	0	134.25	179.5	208.5	355.417	555.083	466.667	0	8.25	4.5	1.56903	0	0	8.2676	11.8061	14.1691	24.0993	26.1236	29.5566	0	0.323616	0.194471	chr6	54173226	54178712	+	4	circRNA	-	ENSSSCT00000003643	ENSSSCG00000003279	mRNA	chr6:54165362-54173225|chr6:54178712-54182480	NA	GO:0005524(ATP binding);GO:0000166(nucleotide binding)	NA
circRNA1185	40	42	101	91	65	135	247	221	165	90	156	99	6.85821	6.93913	16.5089	15.5138	11.8349	25.397	46.3634	28.7925	28.9297	10.1194	16.94	11.8438	chr6	64153861	64157595	-	3	circRNA	-	ENSSSCT00000003763	SLC25A33	mRNA	chr6:64150475-64153860|chr6:64157595-64168339	solute carrier family 25 member 33 [Source:HGNC Symbol;Acc:HGNC:29681]	GO:0031966(mitochondrial membrane);GO:0016021(integral component of membrane);GO:0016020(membrane);GO:0005743(mitochondrial inner membrane);GO:0005739(mitochondrion);GO:1990519(mitochondrial pyrimidine nucleotide import);GO:1990314(cellular response to insulin-like growth factor stimulus);GO:1903426(regulation of reactive oxygen species biosynthetic process);GO:0071156(regulation of cell cycle ar…	NA
circRNA1186	80.05	82.7167	59.7667	42.6667	52.25	80.4667	92.5833	181.567	132.283	500.133	289.242	263.133	4.36785	4.34915	3.10893	2.31484	3.02757	4.81748	5.53053	7.52797	7.38109	17.896	9.9955	10.0181	chr6	69349565	69359388	-	5	circRNA	-	ENSSSCT00000003851	FBLIM1	mRNA	chr6:69344565-69349564|chr6:69359388-69367918	filamin binding LIM protein 1 [Source:HGNC Symbol;Acc:HGNC:24686]	GO:0030054(cell junction);GO:0005925(focal adhesion);GO:0001725(stress fiber);GO:0001650(fibrillar center);GO:0033623(regulation of integrin activation);GO:0016337(single organismal cell-cell adhesion);GO:0046872(metal ion binding);GO:0031005(filamin binding);GO:0008270(zinc ion binding)	NA
circRNA1187	249	125	129	126	130	209	168	157	141	184	99	56	13.1939	6.38245	6.5164	6.6385	7.31506	12.1511	9.74562	6.32132	7.64013	6.39373	3.32235	2.07045	chr6	71581053	71584538	-	6	circRNA	-	ENSSSCT00000003874	ENSSSCG00000003488	mRNA	chr6:71578998-71581052|chr6:71584538-71587499	NA	NA	05203(Viral carcinogenesis)
circRNA1188	24	5	5	6.5	16.5	11.5	18.5	22	37.5	9	46.5	12.5	5.8853	1.1815	1.16889	1.58488	4.29678	3.09423	4.96657	4.09936	9.40368	1.44732	7.22183	2.1388	chr6	74975291	74976069	+	2	circRNA	-	ENSSSCT00000003922	KDM1A	mRNA	chr6:74972674-74975290|chr6:74976069-74977512	lysine-specific histone demethylase 1A [Source:RefSeq peptide;Acc:NP_001106157]	GO:1990391(DNA repair complex);GO:0043234(protein complex);GO:0005667(transcription factor complex);GO:0005654(nucleoplasm);GO:0005634(nucleus);GO:0000790(nuclear chromatin);GO:0000784(nuclear chromosome, telomeric region);GO:2000648(positive regulation of stem cell proliferation);GO:2000179(positive regulation of neural precursor cell proliferation);GO:1990138(neuron projection extension);GO:190…	NA
circRNA1189	457.5	547.5	462	347.5	241.5	409.5	409.5	560.5	483.25	43	94	96	81.0775	93.4971	78.0542	61.2337	45.4494	79.627	79.4494	75.478	87.5769	4.99736	10.5505	11.8709	chr6	74980742	74991645	+	2	circRNA	-	ENSSSCT00000003922	KDM1A	mRNA	chr6:74979548-74980741|chr6:74991645-74992304	lysine-specific histone demethylase 1A [Source:RefSeq peptide;Acc:NP_001106157]	GO:1990391(DNA repair complex);GO:0043234(protein complex);GO:0005667(transcription factor complex);GO:0005654(nucleoplasm);GO:0005634(nucleus);GO:0000790(nuclear chromatin);GO:0000784(nuclear chromosome, telomeric region);GO:2000648(positive regulation of stem cell proliferation);GO:2000179(positive regulation of neural precursor cell proliferation);GO:1990138(neuron projection extension);GO:190…	NA
circRNA119	55	59	54	44	97	76	46	153	62.5	83	82	13	7.58101	7.83649	7.09584	6.03037	14.1984	11.4941	6.94144	16.0248	8.80954	7.5025	7.15839	1.25029	chr4	116017070	116017460	+	2	circRNA	-	ENSSSCT00000007397	CSDE1	mRNA	chr4:116015126-116017069|chr4:116017460-116021467	cold shock domain containing E1 [Source:HGNC Symbol;Acc:HGNC:29905]	GO:0070937(CRD-mediated mRNA stability complex);GO:0016021(integral component of membrane);GO:0016020(membrane);GO:0005886(plasma membrane);GO:0005829(cytosol);GO:0005794(Golgi apparatus);GO:0005743(mitochondrial inner membrane);GO:0070966(nuclear-transcribed mRNA catabolic process, no-go decay);GO:0006355(regulation of transcription, DNA-templated);GO:0003723(RNA binding);GO:0003677(DNA binding)…	NA
circRNA1190	32	43	22	82	68	89	90	167	67	104	3	6	6.55192	8.48383	4.29425	16.6939	14.7853	19.9943	20.1738	25.9819	14.0282	13.9642	0.389025	0.857183	chr6	83263934	83264139	-	1	circRNA	-	ENSSSCT00000027475	RNF19B	mRNA	chr6:83262412-83263933|chr6:83264139-83276627	ring finger protein 19B [Source:HGNC Symbol;Acc:HGNC:26886]	GO:0044194(cytolytic granule);GO:0016021(integral component of membrane);GO:0016020(membrane);GO:0005829(cytosol);GO:0000151(ubiquitin ligase complex);GO:0042787(protein ubiquitination involved in ubiquitin-dependent protein catabolic process);GO:0032436(positive regulation of proteasomal ubiquitin-dependent protein catabolic process);GO:0016567(protein ubiquitination);GO:0000209(protein polyubiq…	NA
circRNA1191	83.3333	39	29	28.1667	34.6667	57.6667	48.8333	82.1667	35	4.5	49.1667	21	2.28384	1.02995	0.757689	0.767555	1.00893	1.73408	1.46518	1.71111	0.980899	0.0808766	0.853405	0.401578	chr6	85269339	85279398	+	11	circRNA	-	ENSSSCT00000004025	AGO4	mRNA	chr6:85261964-85269338|chr6:85279398-85284145	argonaute 4, RISC catalytic component [Source:HGNC Symbol;Acc:HGNC:18424]	GO:0070578(RISC-loading complex);GO:0035068(micro-ribonucleoprotein complex);GO:0030529(intracellular ribonucleoprotein complex);GO:0016604(nuclear body);GO:0016442(RISC complex);GO:0016020(membrane);GO:0005829(cytosol);GO:0005737(cytoplasm);GO:0005654(nucleoplasm);GO:0005634(nucleus);GO:0000932(P-body);GO:0043066(negative regulation of apoptotic process);GO:0035280(miRNA loading onto RISC involv…	NA
circRNA1192	0	0	0	14	19	17	21	31	25	35	0	7	0	0	0	2.42619	3.51663	3.251	4.00698	4.10552	4.45574	4.00039	0	0.851279	chr6	89927175	89927815	-	2	circRNA	-	ENSSSCT00000004070	CEP192	mRNA	chr6:89924954-89927174|chr6:89927815-89932620	centrosomal protein 192 [Source:HGNC Symbol;Acc:HGNC:25515]	GO:0005829(cytosol);GO:0005813(centrosome);GO:0005737(cytoplasm);GO:0000242(pericentriolar material);GO:0051298(centrosome duplication);GO:0051225(spindle assembly);GO:0010923(negative regulation of phosphatase activity);GO:0019902(phosphatase binding)	03013(RNA transport)
circRNA1193	21.1553	16.053	18.8333	29.3523	23.0758	36.8333	42.3598	53.4423	37.3689	14.947	12.1667	6.25758	2.81479	2.0582	2.38891	3.88325	3.2605	5.37731	6.17033	5.40316	5.08448	1.3042	1.02526	0.580947	chr6	101724150	101745288	-	2	circRNA	-	ENSSSCT00000004111	OSBPL1A	mRNA	chr6:101697684-101724149|chr6:101745288-101779795	oxysterol binding protein like 1A [Source:HGNC Symbol;Acc:HGNC:16398]	GO:0070062(extracellular exosome);GO:0005770(late endosome);GO:0006869(lipid transport);GO:0006810(transport)	NA
circRNA1194	45.9232	37.2197	41	41.5614	43.0455	66.0525	73.4874	79.7726	65.9573	113.412	28.2273	64.1485	4.56827	3.56778	3.88821	4.11089	4.54725	7.20953	8.00314	6.02989	6.70953	7.39846	1.77839	4.45256	chr6	101724150	101779902	-	3	circRNA	-	ENSSSCT00000004111	OSBPL1A	mRNA	chr6:101697684-101724149|chr6:101779902-101794656	oxysterol binding protein like 1A [Source:HGNC Symbol;Acc:HGNC:16398]	GO:0070062(extracellular exosome);GO:0005770(late endosome);GO:0006869(lipid transport);GO:0006810(transport)	NA
circRNA1195	11.8747	19.8447	17.6944	24.1364	17.026	18.4636	28.8732	41.3226	28.4129	52.7717	16.5495	18.4354	2.65002	4.2675	3.76449	5.35578	4.03496	4.52105	7.05419	7.00725	6.48408	7.72305	2.33908	2.87064	chr6	101779796	101794738	-	2	circRNA	-	ENSSSCT00000004111	OSBPL1A	mRNA	chr6:101745288-101779795|chr6:101794738-101802149	oxysterol binding protein like 1A [Source:HGNC Symbol;Acc:HGNC:16398]	GO:0070062(extracellular exosome);GO:0005770(late endosome);GO:0006869(lipid transport);GO:0006810(transport)	NA
circRNA1196	20.9081	44.6447	26.1278	45.0364	32.7927	35.497	53.9005	63.9893	53.4462	66.2717	29.8828	44.8596	2.14565	4.41488	2.55618	4.59551	3.57374	3.99699	6.0557	4.98984	5.6088	4.46001	1.94224	3.2122	chr6	101779796	101804423	-	4	circRNA	-	ENSSSCT00000004111	OSBPL1A	mRNA	chr6:101745288-101779795|chr6:101804423-101811731	oxysterol binding protein like 1A [Source:HGNC Symbol;Acc:HGNC:16398]	GO:0070062(extracellular exosome);GO:0005770(late endosome);GO:0006869(lipid transport);GO:0006810(transport)	NA
circRNA1197	121.167	165.667	246.667	176.167	128.333	216.5	139.792	173.833	137.333	193.333	75	88.25	3.43222	4.52201	6.66112	4.96183	3.8604	6.72894	4.33511	3.74162	3.9781	3.59138	1.34552	1.74425	chr6	103828536	103854303	+	8	circRNA	-	ENSSSCT00000004118	TAF4B	mRNA	chr6:103818406-103828535|chr6:103854303-103883314	TATA-box binding protein associated factor 4b [Source:HGNC Symbol;Acc:HGNC:11538]	GO:0005669(transcription factor TFIID complex);GO:0005654(nucleoplasm);GO:0001650(fibrillar center);GO:2000648(positive regulation of stem cell proliferation);GO:0051123(RNA polymerase II transcriptional preinitiation complex assembly);GO:0045944(positive regulation of transcription from RNA polymerase II promoter);GO:0006355(regulation of transcription, DNA-templated);GO:0006352(DNA-templated tr…	03022(Basal transcription factors);05016(Huntington's disease);05168(Herpes simplex infection)
circRNA1198	8.66667	14.6667	22.6667	5.66667	16.3333	13	2.66667	12	6.33333	3.33333	0	7.75	1.52947	2.49416	3.81348	0.994357	3.06101	2.51727	0.51521	1.60918	1.14296	0.385771	0	0.954318	chr6	103852154	103854303	+	2	circRNA	-	ENSSSCT00000004118	TAF4B	mRNA	chr6:103843112-103852153|chr6:103854303-103883314	TATA-box binding protein associated factor 4b [Source:HGNC Symbol;Acc:HGNC:11538]	GO:0005669(transcription factor TFIID complex);GO:0005654(nucleoplasm);GO:0001650(fibrillar center);GO:2000648(positive regulation of stem cell proliferation);GO:0051123(RNA polymerase II transcriptional preinitiation complex assembly);GO:0045944(positive regulation of transcription from RNA polymerase II promoter);GO:0006355(regulation of transcription, DNA-templated);GO:0006352(DNA-templated tr…	03022(Basal transcription factors);05016(Huntington's disease);05168(Herpes simplex infection)
circRNA1199	75.6667	93.1667	182.333	79.1667	61	92.6667	18.8333	54.6667	37.1667	0	33.5	35	8.9648	10.6366	20.5943	9.3262	7.67481	12.0464	2.44282	4.92146	4.50296	0	2.51373	2.89339	chr6	108173849	108202404	-	3	circRNA	-	ENSSSCT00000029306	B4GALT6	mRNA	chr6:108165519-108173848|chr6:108202404-108219398	beta-1,4-galactosyltransferase 6 [Source:HGNC Symbol;Acc:HGNC:929]	GO:0005975(carbohydrate metabolic process);GO:0016757(transferase activity, transferring glycosyl groups)	00600(Sphingolipid metabolism)
circRNA12	64.5	62	89	59	44.5	69	28.5	53.5	51	67	55.5	19	11.0589	10.2435	14.5474	10.0584	8.10238	12.9807	5.34962	6.97012	8.9419	7.53336	6.02672	2.27304	chr7	69842801	69844102	+	2	circRNA	-	ENSSSCT00000002190	BAZ1A	mRNA	chr7:69814426-69842800|chr7:69844102-69846754	bromodomain adjacent to zinc finger domain 1A [Source:HGNC Symbol;Acc:HGNC:960]	GO:0008623(CHRAC);GO:0005634(nucleus);GO:0006261(DNA-dependent DNA replication);GO:0046872(metal ion binding);GO:0008270(zinc ion binding);GO:0005515(protein binding)	NA
circRNA120	31	13	20.5	9.5	21	31.5	33	52	44.5	32	23.5	90.5	3.2935	1.33089	2.07632	1.00357	2.36928	3.67201	3.83828	4.19792	4.83464	2.22951	1.58125	6.70884	chr4	116307640	116308620	+	3	circRNA	-	ENSSSCT00000007402	ENSSSCG00000006757	mRNA	chr4:116244730-116307639|chr4:116308620-116336983	NA	GO:0005622(intracellular);GO:0046872(metal ion binding);GO:0008270(zinc ion binding)	NA
circRNA1200	0	0	17	9	10	15	7	0	13	0	22	9	0	0	1.01419	0.560009	0.66455	1.02995	0.47957	0	0.831914	0	0.871938	0.392981	chr6	113681718	113682391	+	1	circRNA	-	ENSSSCT00000004149	ENSSSCG00000003747	mRNA	chr6:113564908-113681717|chr6:113682391-113695690	NA	NA	NA
circRNA1201	789	865.5	745	414.5	594	789.5	151	244.333	244.5	31	36	25	85.9908	90.8964	77.4064	44.9186	68.7485	94.4115	18.0169	20.2345	27.2498	2.21564	2.48493	1.90116	chr6	122037337	122107954	-	2	circRNA	-	ENSSSCT00000004163	ADGRL2	mRNA	chr6:122007755-122037336|None	adhesion G protein-coupled receptor L2 [Source:HGNC Symbol;Acc:HGNC:18582]	GO:0016021(integral component of membrane);GO:0016020(membrane);GO:0007186(G-protein coupled receptor signaling pathway);GO:0007166(cell surface receptor signaling pathway);GO:0007165(signal transduction);GO:0030246(carbohydrate binding);GO:0004930(G-protein coupled receptor activity);GO:0004888(transmembrane signaling receptor activity);GO:0004871(signal transducer activity)	NA
circRNA1202	5	3.77143	2.5	11	4	12	17.5	43	19.5	17.5	11	6	0.477127	0.346796	0.227431	1.04372	0.405346	1.25644	1.82822	3.11794	1.90286	1.09513	0.664804	0.399501	chr6	125666114	125671201	-	3	circRNA	-	ENSSSCT00000004172	MIGA1	mRNA	chr6:125660201-125666113|chr6:125671201-125675559	mitoguardin 1 [Source:HGNC Symbol;Acc:HGNC:24741]	GO:0008053(mitochondrial fusion)	NA
circRNA1203	0	0	8	3	14	9	31	32	11	0	0	0	0	0	1.67541	0.655288	3.26599	2.16933	7.45545	5.34159	2.47108	0	0	0	chr6	127502432	127502785	-	2	circRNA	-	ENSSSCT00000004178	RABGGTB	mRNA	chr6:127502130-127502431|chr6:127502785-127502946	Rab geranylgeranyltransferase, beta subunit [Source:HGNC Symbol;Acc:HGNC:9796]	GO:0005968(Rab-protein geranylgeranyltransferase complex);GO:0018344(protein geranylgeranylation);GO:0003824(catalytic activity);GO:0004663(Rab geranylgeranyltransferase activity)	NA
circRNA1204	92.5	53	47	54	124	124	122.5	184	196.5	0	32	0	6.5792	3.63255	3.18694	3.81902	9.36601	9.67722	9.53882	9.94454	14.2923	0	1.44151	0	chr6	133782826	133792642	+	4	circRNA	-	ENSSSCT00000004200	WLS	mRNA	chr6:133754175-133782825|chr6:133792642-133794897	wntless Wnt ligand secretion mediator [Source:HGNC Symbol;Acc:HGNC:30238]	GO:0031410(cytoplasmic vesicle);GO:0016021(integral component of membrane);GO:0016020(membrane);GO:0005886(plasma membrane);GO:0005802(trans-Golgi network);GO:0005794(Golgi apparatus);GO:0005783(endoplasmic reticulum);GO:0005769(early endosome);GO:0090263(positive regulation of canonical Wnt signaling pathway);GO:0061357(positive regulation of Wnt protein secretion);GO:0061355(Wnt protein secreti…	NA
circRNA1205	24	24	56	28	53	74	20	45	29	17	43	0	3.24446	3.12642	7.21713	3.76371	7.60868	10.9764	2.95998	4.62253	4.00902	1.50711	3.6816	0	chr6	138128900	138134104	+	3	circRNA	-	ENSSSCT00000004225	ENSSSCG00000003818	mRNA	chr6:138122836-138128899|chr6:138134104-138139606	NA	GO:0005622(intracellular);GO:0043547(positive regulation of GTPase activity);GO:0007264(small GTPase mediated signal transduction);GO:0005085(guanyl-nucleotide exchange factor activity)	NA
circRNA1206	31.8333	44.8333	59	54.6667	58	71.6667	52	88.4667	67.8333	10.75	25	21.1667	3.80359	5.16199	6.72061	6.49472	7.35938	9.39563	6.80208	8.03205	8.28826	0.842331	1.89186	1.76468	chr6	140604563	140639893	-	3	circRNA	-	ENSSSCT00000004237	ENSSSCG00000003828	mRNA	chr6:140508799-140604562|chr6:140639893-140654254	NA	GO:0005739(mitochondrion);GO:0046167(glycerol-3-phosphate biosynthetic process);GO:0016310(phosphorylation);GO:0006641(triglyceride metabolic process);GO:0006071(glycerol metabolic process);GO:0005975(carbohydrate metabolic process);GO:0016773(phosphotransferase activity, alcohol group as acceptor);GO:0004370(glycerol kinase activity)	NA
circRNA1207	9.33333	10.8333	17.5	15.6667	26.5	33.1667	31.5	60.9667	34.8333	9.75	23	8.66667	1.49114	1.66782	2.66542	2.48877	4.49604	5.81409	5.5096	7.40133	5.69097	1.02153	2.32727	0.966134	chr6	140633018	140639893	-	2	circRNA	-	ENSSSCT00000004237	ENSSSCG00000003828	mRNA	chr6:140604651-140633017|chr6:140639893-140654254	NA	GO:0005739(mitochondrion);GO:0046167(glycerol-3-phosphate biosynthetic process);GO:0016310(phosphorylation);GO:0006641(triglyceride metabolic process);GO:0006071(glycerol metabolic process);GO:0005975(carbohydrate metabolic process);GO:0016773(phosphotransferase activity, alcohol group as acceptor);GO:0004370(glycerol kinase activity)	NA
circRNA1208	83.5	65.3333	22.5	32.0833	40	26.5	13.5	24.5	12	0	66.5	15	6.10375	4.60203	1.56797	2.33193	3.10507	2.12546	1.08037	1.36085	0.897016	0	3.07871	0.765076	chr6	147045770	147067936	+	5	circRNA	-	ENSSSCT00000004265	ENSSSCG00000003853	mRNA	chr6:147026376-147045769|chr6:147067936-147077679	non-specific lipid-transfer protein [Source:RefSeq peptide;Acc:NP_001161887]	GO:0030301(cholesterol transport);GO:0015914(phospholipid transport);GO:0008152(metabolic process);GO:0006694(steroid biosynthetic process);GO:0032934(sterol binding);GO:0016747(transferase activity, transferring acyl groups other than amino-acyl groups);GO:0016746(transferase activity, transferring acyl groups);GO:0016740(transferase activity);GO:0015248(sterol transporter activity);GO:0003824(c…	00120(Primary bile acid biosynthesis);04146(Peroxisome);03320(PPAR signaling pathway)
circRNA1209	67	71	68	41	30	35	59	125	127	2	79	41	8.8587	9.04604	8.57136	5.39021	4.21229	5.07763	8.54033	12.5586	17.1715	0.173416	6.61545	3.78253	chr6	147453409	147458207	-	3	circRNA	-	ENSSSCT00000004271	ZCCHC11	mRNA	chr6:147452412-147453408|chr6:147458207-147467397	zinc finger CCHC-type containing 11 [Source:HGNC Symbol;Acc:HGNC:28981]	GO:0005829(cytosol);GO:0005737(cytoplasm);GO:0005730(nucleolus);GO:0005634(nucleus);GO:0070102(interleukin-6-mediated signaling pathway);GO:0032755(positive regulation of interleukin-6 production);GO:0032088(negative regulation of NF-kappaB transcription factor activity);GO:0031664(regulation of lipopolysaccharide-mediated signaling pathway);GO:0031123(RNA 3'-end processing);GO:0010586(miRNA meta…	NA
circRNA121	35	8	2	4	10	0	18	1	8	0	35	25	4.0115	0.883554	0.218531	0.455853	1.21714	0	2.25859	0.0870911	0.937642	0	2.54064	1.99932	chr4	117915467	117917659	+	3	circRNA	-	ENSSSCT00000007425	ST7L	mRNA	chr4:117913079-117915466|chr4:117917659-117921275	suppression of tumorigenicity 7 like [Source:HGNC Symbol;Acc:HGNC:18441]	GO:0016021(integral component of membrane);GO:0016020(membrane);GO:0030308(negative regulation of cell growth)	NA
circRNA1210	23.5	12.5	16.5	6	10	12.5	7.5	32.5	25	0	0	3.5	5.38686	2.76111	3.60577	1.36756	2.43428	3.14395	1.88216	5.66092	5.86026	0	0	0.559809	chr6	149027711	149033483	+	2	circRNA	-	ENSSSCT00000004289	FAF1	mRNA	chr6:148980488-149027710|chr6:149033483-149069126	Fas associated factor 1 [Source:HGNC Symbol;Acc:HGNC:3578]	GO:0048471(perinuclear region of cytoplasm);GO:0034098(VCP-NPL4-UFD1 AAA ATPase complex);GO:0005829(cytosol);GO:0005737(cytoplasm);GO:0005635(nuclear envelope);GO:0005634(nucleus);GO:1902043(positive regulation of extrinsic apoptotic signaling pathway via death domain receptors);GO:0042176(regulation of protein catabolic process);GO:0031334(positive regulation of protein complex assembly);GO:0030…	NA
circRNA1211	0	0	0	2.5	8.5	2	16	14	13	0	0	0	0	0	0	0.504068	1.83039	0.44499	3.55198	2.15718	2.69572	0	0	0	chr6	152866915	152869812	+	2	circRNA	-	ENSSSCT00000004324	ENSSSCG00000003909	mRNA	chr6:152798870-152866914|chr6:152869812-152878862	NA	GO:0005942(phosphatidylinositol 3-kinase complex);GO:2001275(positive regulation of glucose import in response to insulin stimulus);GO:0046854(phosphatidylinositol phosphorylation);GO:0043551(regulation of phosphatidylinositol 3-kinase activity);GO:0008286(insulin receptor signaling pathway);GO:0046935(1-phosphatidylinositol-3-kinase regulator activity);GO:0035014(phosphatidylinositol 3-kinase re…	04014(Ras signaling pathway);04015(Rap1 signaling pathway);04012(ErbB signaling pathway);04370(VEGF signaling pathway);04630(Jak-STAT signaling pathway);04668(TNF signaling pathway);04066(HIF-1 signaling pathway);04068(FoxO signaling pathway);04070(Phosphatidylinositol signaling system);04071(Sphingolipid signaling pathway);04024(cAMP signaling pathway);04022(cGMP - PKG signaling pathway);04151(P…
circRNA1212	118	167	113.5	82	109.75	88.75	169.75	235.25	105.5	408.75	105.5	253.75	7.63344	10.4102	6.9997	5.27447	7.53954	6.29947	12.022	11.5639	6.9791	17.3404	4.32243	11.4538	chr5	4601699	4608833	-	6	circRNA	-	ENSSSCT00000000074	EP300	mRNA	chr5:4600934-4601698|chr5:4608833-4610077	E1A binding protein p300 [Source:HGNC Symbol;Acc:HGNC:3373]	GO:0043234(protein complex);GO:0005829(cytosol);GO:0005667(transcription factor complex);GO:0005654(nucleoplasm);GO:0005634(nucleus);GO:0000123(histone acetyltransferase complex);GO:0090043(regulation of tubulin deacetylation);GO:0060765(regulation of androgen receptor signaling pathway);GO:0051091(positive regulation of sequence-specific DNA binding transcription factor activity);GO:0050821(prot…	04310(Wnt signaling pathway);04330(Notch signaling pathway);04350(TGF-beta signaling pathway);04630(Jak-STAT signaling pathway);04066(HIF-1 signaling pathway);04068(FoxO signaling pathway);04024(cAMP signaling pathway);04110(Cell cycle);04520(Adherens junction);04922(Glucagon signaling pathway);04919(Thyroid hormone signaling pathway);04916(Melanogenesis);04720(Long-term potentiation);05200(Pathw…
circRNA1213	161	167	156	157	127	142	125	206	148	13	124	69	28.5322	28.5187	26.356	27.6653	23.9009	27.6118	24.2519	27.7403	26.8213	1.51083	13.9177	8.53221	chr5	5192560	5193695	+	2	circRNA	-	ENSSSCT00000000081	MKL1	mRNA	chr5:5189751-5192559|chr5:5193695-5197545	megakaryoblastic leukemia (translocation) 1 [Source:HGNC Symbol;Acc:HGNC:14334]	GO:0005829(cytosol);GO:0005737(cytoplasm);GO:0005654(nucleoplasm);GO:0005634(nucleus);GO:2001234(negative regulation of apoptotic signaling pathway);GO:0051145(smooth muscle cell differentiation);GO:0045944(positive regulation of transcription from RNA polymerase II promoter);GO:0045893(positive regulation of transcription, DNA-templated);GO:0043154(negative regulation of cysteine-type endopeptid…	NA
circRNA1214	0	0	0	6	0	0	21	0	2	0	1	0	0	0	0	0.520975	0	0	2.00764	0	0.178598	0	0.0553065	0	chr5	5771054	5804489	+	3	circRNA	-	ENSSSCT00000000087	ENTHD1	mRNA	chr5:5757578-5771053|chr5:5804489-5834323	ENTH domain containing 1 [Source:HGNC Symbol;Acc:HGNC:26352]	NA	NA
circRNA1215	311	325.5	343.5	270.5	283	273.5	313.5	591.5	344.5	1027.5	609.5	464	36.2358	36.5454	38.1548	31.338	35.0159	34.9649	39.9892	52.3682	41.0464	78.5096	44.9768	37.7223	chr5	6217939	6219650	+	2	circRNA	-	ENSSSCT00000000095	RPL3	mRNA	chr5:6216985-6217938|chr5:6219650-6220149	ribosomal protein L3 [Source:HGNC Symbol;Acc:HGNC:10332]	GO:0070062(extracellular exosome);GO:0030529(intracellular ribonucleoprotein complex);GO:0022625(cytosolic large ribosomal subunit);GO:0005925(focal adhesion);GO:0005840(ribosome);GO:0005829(cytosol);GO:0005737(cytoplasm);GO:0005730(nucleolus);GO:0005634(nucleus);GO:0005622(intracellular);GO:0071353(cellular response to interleukin-4);GO:0006412(translation);GO:0003735(structural constituent of r…	03010(Ribosome)
circRNA1216	63	46	94	89	50.5	139	215	239	133	126	103	107	10.2201	7.19077	14.5374	14.3559	8.69973	24.7414	38.1837	29.4609	22.0634	13.4044	10.5825	12.1115	chr5	6890151	6890544	+	2	circRNA	-	ENSSSCT00000022980	CSNK1E	mRNA	chr5:6880978-6890150|chr5:6890544-6893186	casein kinase 1 epsilon [Source:HGNC Symbol;Acc:HGNC:2453]	GO:0030529(intracellular ribonucleoprotein complex);GO:0005737(cytoplasm);GO:0005634(nucleus);GO:2000052(positive regulation of non-canonical Wnt signaling pathway);GO:1903827(regulation of cellular protein localization);GO:0090263(positive regulation of canonical Wnt signaling pathway);GO:0042752(regulation of circadian rhythm);GO:0034613(cellular protein localization);GO:0032922(circadian regul…	04310(Wnt signaling pathway);04340(Hedgehog signaling pathway);04390(Hippo signaling pathway);04068(FoxO signaling pathway);04710(Circadian rhythm)
circRNA1217	5	21.5	27	35.1667	45.1667	37.1667	26.5	75	46.6667	6	18	18.5	0.357441	1.48108	1.84011	2.49972	3.42889	2.91531	2.07399	4.07409	3.41153	0.281286	0.814974	0.922803	chr5	12490269	12496099	-	6	circRNA	-	ENSSSCT00000000170	PWP1	mRNA	chr5:12489235-12490268|chr5:12496099-12504708	PWP1 homolog, endonuclein [Source:HGNC Symbol;Acc:HGNC:17015]	GO:0005794(Golgi apparatus);GO:0005730(nucleolus);GO:0005634(nucleus);GO:2000738(positive regulation of stem cell differentiation);GO:1903262(negative regulation of serine phosphorylation of STAT3 protein);GO:0034773(histone H4-K20 trimethylation);GO:1990889(H4K20me3 modified histone binding)	NA
circRNA1218	43.5	30.75	35.0833	38.4167	15.75	27	10	30.25	32	96.75	24.75	20.75	2.14841	1.46345	1.65186	1.88658	0.826058	1.46315	0.540699	1.13524	1.61617	3.13359	0.774177	0.715072	chr5	13967635	13980303	-	6	circRNA	-	ENSSSCT00000000178	ENSSSCG00000000169	mRNA	chr5:13962249-13967634|chr5:13980303-13990402	NA	GO:0005666(DNA-directed RNA polymerase III complex);GO:0006383(transcription from RNA polymerase III promoter);GO:0006351(transcription, DNA-templated);GO:0032549(ribonucleoside binding);GO:0003899(DNA-directed 5'-3' RNA polymerase activity);GO:0003677(DNA binding);GO:0001056(RNA polymerase III activity)	NA
circRNA1219	62.25	84.5	110.75	32.5	64.25	85.75	96.5	103	57.75	53.5	28.25	30.5	4.13477	5.40846	7.01296	2.14646	4.53197	6.24948	7.01725	5.19858	3.92259	2.33039	1.18841	1.41356	chr5	17115286	17122289	+	5	circRNA	-	ENSSSCT00000028346	DIP2B	mRNA	chr5:17112458-17115285|chr5:17122289-17125808	disco interacting protein 2 homolog B [Source:HGNC Symbol;Acc:HGNC:29284]	GO:0070062(extracellular exosome);GO:0016020(membrane);GO:0005737(cytoplasm);GO:0005634(nucleus);GO:0008152(metabolic process);GO:0003824(catalytic activity)	NA
circRNA122	42	54	32	34	26	65	79	67	48	148	310	142	3.09699	3.83697	2.2495	2.49285	2.03594	5.25897	6.37741	3.75405	3.61943	7.15673	14.4773	7.30603	chr4	121741759	121747592	-	6	circRNA	-	ENSSSCT00000007494	STXBP3	mRNA	chr4:121731936-121741758|chr4:121747592-121753787	syntaxin binding protein 3 [Source:HGNC Symbol;Acc:HGNC:11446]	GO:0070820(tertiary granule);GO:0070062(extracellular exosome);GO:0042581(specific granule);GO:0031091(platelet alpha granule);GO:0016324(apical plasma membrane);GO:0005886(plasma membrane);GO:0005829(cytosol);GO:0070527(platelet aggregation);GO:0045955(negative regulation of calcium ion-dependent exocytosis);GO:0043312(neutrophil degranulation);GO:0032868(response to insulin);GO:0030073(insulin …	NA
circRNA1220	55	47	47	41	49	70	12	19	15	0	14	5	6.8029	5.60189	5.54211	5.04245	6.4362	9.50008	1.62495	1.78575	1.89728	0	1.09672	0.431524	chr5	23963982	23964620	+	3	circRNA	-	ENSSSCT00000000461	ENSSSCG00000026524	mRNA	chr5:23963126-23963981|chr5:23964620-23965419	NA	GO:0005737(cytoplasm);GO:0005634(nucleus);GO:1903660(negative regulation of complement-dependent cytotoxicity);GO:0035771(interleukin-4-mediated signaling pathway);GO:0007165(signal transduction);GO:0006355(regulation of transcription, DNA-templated);GO:0006351(transcription, DNA-templated);GO:0004871(signal transducer activity);GO:0003700(transcription factor activity, sequence-specific DNA bind…	04630(Jak-STAT signaling pathway);05321(Inflammatiory bowel disease (IBD));05161(Hepatitis B)
circRNA1221	27	30	30	20	23	30	33	59	25	110	28	16	5.63765	6.03616	5.97175	4.15232	5.09993	6.87311	7.54355	9.361	5.33806	15.0623	3.7028	2.33108	chr5	24795753	24795954	-	1	circRNA	-	ENSSSCT00000028772	ENSSSCG00000023318	mRNA	chr5:24792218-24795752|chr5:24795954-24797245	NA	GO:0005829(cytosol);GO:0006431(methionyl-tRNA aminoacylation);GO:0006418(tRNA aminoacylation for protein translation);GO:0006412(translation);GO:0016874(ligase activity);GO:0005524(ATP binding);GO:0004825(methionine-tRNA ligase activity);GO:0004812(aminoacyl-tRNA ligase activity);GO:0000166(nucleotide binding)	NA
circRNA1222	6	1	12	5	7	21	0	16	17	0	31	36	0.746513	0.119892	1.42335	0.618561	0.924882	2.86684	0	1.51266	2.16294	0	2.44278	3.1253	chr5	32070350	32071815	+	3	circRNA	-	ENSSSCT00000000504	ENSSSCG00000000466	mRNA	chr5:32068240-32070349|chr5:32071815-32073276	NA	GO:0016363(nuclear matrix);GO:0005737(cytoplasm);GO:0005643(nuclear pore);GO:0071528(tRNA re-export from nucleus);GO:0006886(intracellular protein transport);GO:0015932(nucleobase-containing compound transmembrane transporter activity);GO:0008536(Ran GTPase binding);GO:0000049(tRNA binding)	03013(RNA transport)
circRNA1223	9.83333	21	26	28	12.5	20.5	7.83333	21.5	14.5	0	23.6667	10.5	1.00181	2.06163	2.52525	2.83642	1.35238	2.29159	0.873695	1.66441	1.51065	0	1.52707	0.746411	chr5	34057373	34072037	-	3	circRNA	-	ENSSSCT00000000516	GRIP1	mRNA	chr5:34042793-34057372|chr5:34072037-34084018	glutamate receptor interacting protein 1 [Source:HGNC Symbol;Acc:HGNC:18708]	GO:0016358(dendrite development);GO:0030159(receptor signaling complex scaffold activity);GO:0055037(recycling endosome);GO:0045121(membrane raft);GO:0043005(neuron projection);GO:0030425(dendrite);GO:0005886(plasma membrane);GO:0008104(protein localization);GO:0035259(glucocorticoid receptor binding);GO:0008022(protein C-terminus binding)	NA
circRNA1224	3.33333	1	0	2.66667	0	4	6.33333	0	1	0	15.6667	3	0.422202	0.122052	0	0.335843	0	0.555903	0.878216	0	0.129524	0	1.25677	0.265135	chr5	34070535	34072037	-	2	circRNA	-	ENSSSCT00000000516	GRIP1	mRNA	chr5:34057453-34070534|chr5:34072037-34084018	glutamate receptor interacting protein 1 [Source:HGNC Symbol;Acc:HGNC:18708]	GO:0016358(dendrite development);GO:0030159(receptor signaling complex scaffold activity);GO:0055037(recycling endosome);GO:0045121(membrane raft);GO:0043005(neuron projection);GO:0030425(dendrite);GO:0005886(plasma membrane);GO:0008104(protein localization);GO:0035259(glucocorticoid receptor binding);GO:0008022(protein C-terminus binding)	NA
circRNA1225	2	0.5	0	5	4	1	0	11	3.5	8.5	15	7	0.52395	0.126222	0	1.30244	1.11281	0.287447	0	2.18972	0.937642	1.4603	2.48879	1.27956	chr5	35794493	35795037	+	2	circRNA	-	ENSSSCT00000000524	ENSSSCG00000000486	mRNA	chr5:35788372-35794492|chr5:35795037-35800097	NA	GO:0031080(nuclear pore outer ring);GO:0005643(nuclear pore);GO:0006810(transport);GO:0006606(protein import into nucleus);GO:0006406(mRNA export from nucleus);GO:0006355(regulation of transcription, DNA-templated);GO:0000973(posttranscriptional tethering of RNA polymerase II gene DNA at nuclear periphery);GO:0017056(structural constituent of nuclear pore);GO:0005487(nucleocytoplasmic transporter…	03013(RNA transport)
circRNA1226	0	0	0	7	0	0	0	10	0	0	0	0	0	0	0	0.704003	0	0	0	0.768574	0	0	0	0	chr5	39469938	39489633	+	3	circRNA	-	ENSSSCT00000000555	TRHDE	mRNA	chr5:39469475-39469937|chr5:39489633-39508987	thyrotropin releasing hormone degrading enzyme [Source:HGNC Symbol;Acc:HGNC:30748]	GO:0070062(extracellular exosome);GO:0016021(integral component of membrane);GO:0016020(membrane);GO:0005737(cytoplasm);GO:0043171(peptide catabolic process);GO:0008217(regulation of blood pressure);GO:0007267(cell-cell signaling);GO:0007165(signal transduction);GO:0006508(proteolysis);GO:0070006(metalloaminopeptidase activity);GO:0042277(peptide binding);GO:0008270(zinc ion binding);GO:0008237(m…	NA
circRNA1227	9	9	3	30	48	24	132	236	104	0	0	17	0.712199	0.686287	0.226321	2.36051	4.03368	2.08386	11.4356	14.1908	8.41591	0	0	0.938666	chr5	42357907	42359551	+	2	circRNA	-	ENSSSCT00000000561	GLIPR1	mRNA	chr5:42344420-42357906|chr5:42359551-42368128	GLI pathogenesis related 1 [Source:HGNC Symbol;Acc:HGNC:17001]	GO:0016021(integral component of membrane);GO:0016020(membrane);GO:0005576(extracellular region)	NA
circRNA1228	0	0	0	7.33333	13.3333	2	20.5	36	13.6667	15	0	0	0	0	0	1.1433	2.22011	0.344081	3.51897	4.28915	2.19132	1.54237	0	0	chr5	47577974	47578790	+	2	circRNA	-	ENSSSCT00000000582	ENSSSCG00000000540	mRNA	chr5:47572571-47577973|chr5:47578790-47584328	NA	GO:0006508(proteolysis);GO:0016787(hydrolase activity);GO:0008236(serine-type peptidase activity);GO:0008233(peptidase activity);GO:0004252(serine-type endopeptidase activity)	NA
circRNA1229	67.5	68	80	54.5	70.3333	77.3333	56.75	64.75	72.6667	2	5	32.5	9.27367	9.00246	10.4781	7.4451	10.2615	11.6577	8.53573	6.75963	10.2092	0.180194	0.435065	3.11555	chr5	56918746	56928732	-	3	circRNA	-	ENSSSCT00000000632	AEBP2	mRNA	chr5:56916192-56918745|chr5:56928732-56933126	AE binding protein 2 [Source:HGNC Symbol;Acc:HGNC:24051]	GO:0035098(ESC/E(Z) complex);GO:0005634(nucleus);GO:0006355(regulation of transcription, DNA-templated);GO:0000122(negative regulation of transcription from RNA polymerase II promoter);GO:0046872(metal ion binding);GO:0003714(transcription corepressor activity);GO:0003677(DNA binding);GO:0003676(nucleic acid binding);GO:0001078(transcriptional repressor activity, RNA polymerase II core promoter p…	NA
circRNA123	78.75	72.5	68.75	50.0833	81.5833	82.0833	8.33333	9.33333	6.5	0	0	0	12.2565	10.8733	10.2008	7.75062	13.484	14.0175	1.41992	1.1038	1.03452	0	0	0	chr4	122107165	122109225	+	2	circRNA	-	ENSSSCT00000007500	SLC25A24	mRNA	chr4:122098440-122107164|chr4:122109225-122111821	solute carrier family 25 member 24 [Source:HGNC Symbol;Acc:HGNC:20662]	GO:0016021(integral component of membrane);GO:0016020(membrane);GO:0005743(mitochondrial inner membrane);GO:0005739(mitochondrion);GO:0071277(cellular response to calcium ion);GO:0055085(transmembrane transport);GO:0034599(cellular response to oxidative stress);GO:0015867(ATP transport);GO:0015866(ADP transport);GO:0010941(regulation of cell death);GO:0006839(mitochondrial transport);GO:0006810(t…	NA
circRNA1230	12.6667	9.83333	7.33333	4.33333	14.8333	8.5	4	22.5	6	53.3333	41.8333	15.8333	1.12003	0.837863	0.618179	0.380992	1.39286	0.824677	0.387218	1.51177	0.542535	3.09264	2.34276	0.976885	chr5	59945632	59952213	-	4	circRNA	-	ENSSSCT00000000644	DERA	mRNA	chr5:59928436-59945631|chr5:59952213-59953238	deoxyribose-phosphate aldolase [Source:HGNC Symbol;Acc:HGNC:24269]	GO:0070062(extracellular exosome);GO:0005737(cytoplasm);GO:0005634(nucleus);GO:0046121(deoxyribonucleoside catabolic process);GO:0016052(carbohydrate catabolic process);GO:0009264(deoxyribonucleotide catabolic process);GO:0016829(lyase activity);GO:0004139(deoxyribose-phosphate aldolase activity);GO:0003824(catalytic activity)	00030(Pentose phosphate pathway)
circRNA1231	4.33333	1	8.33333	4.33333	8.66667	2	12	17.6667	18.3333	26.6667	22.6667	12	1.00424	0.223316	1.84111	0.998535	2.13289	0.50856	3.04455	3.11103	4.34475	4.05272	3.3269	1.94044	chr5	70006732	70006913	+	1	circRNA	-	ENSSSCT00000023353	ENSSSCG00000029464	mRNA	chr5:70002421-70006731|chr5:70006913-70008803	NA	GO:0055114(oxidation-reduction process);GO:0016706(oxidoreductase activity, acting on paired donors, with incorporation or reduction of molecular oxygen, 2-oxoglutarate as one donor, and incorporation of one atom each of oxygen into both donors)	NA
circRNA1232	23.1	24.75	44.5	27.35	32.25	50	46.65	80.8	46	93.7	10.5	25.2	4.55286	4.70059	8.36137	5.35989	6.75	10.8128	10.0659	12.1009	9.27126	12.1109	1.31069	3.46558	chr5	72099959	72108057	+	2	circRNA	-	ENSSSCT00000031909	BCL2L13	mRNA	chr5:72095416-72099958|chr5:72108057-72110682	BCL2 like 13 [Source:HGNC Symbol;Acc:HGNC:17164]	GO:0016021(integral component of membrane);GO:0016020(membrane);GO:0005739(mitochondrion);GO:0042981(regulation of apoptotic process)	05134(Legionellosis)
circRNA1233	51	69	51	52	49	68.5	67	145	134.5	95	73	29	3.68967	4.81029	3.51749	3.74065	3.76457	5.43758	5.30664	7.97115	9.95058	4.50717	3.34486	1.46392	chr5	72248349	72252123	-	4	circRNA	-	ENSSSCT00000000834	MICAL3	mRNA	chr5:72247057-72248348|chr5:72252123-72253970	microtubule associated monooxygenase, calponin and LIM domain containing 3 [Source:HGNC Symbol;Acc:HGNC:24694]	GO:0005886(plasma membrane);GO:0005829(cytosol);GO:0005654(nucleoplasm);GO:0005634(nucleus);GO:0055114(oxidation-reduction process);GO:0030042(actin filament depolymerization);GO:0007010(cytoskeleton organization);GO:0006887(exocytosis);GO:0071949(FAD binding);GO:0046872(metal ion binding);GO:0017137(Rab GTPase binding);GO:0016709(oxidoreductase activity, acting on paired donors, with incorporati…	NA
circRNA1234	0	12	4	5	2	7	6	11	0	0	0	0	0	1.5733	0.518836	0.676427	0.288972	1.04501	0.893723	1.13724	0	0	0	0	chr5	72830482	72838466	-	2	circRNA	-	ENSSSCT00000027279	CPNE8	mRNA	chr5:72819388-72830481|chr5:72838466-72847045	copine 8 [Source:HGNC Symbol;Acc:HGNC:23498]	GO:0070062(extracellular exosome)	NA
circRNA1235	13.8333	52	40	28.0833	31.3333	22.3667	32.0833	45.9167	25	61	15.8333	15.8667	2.27028	8.22358	6.25833	4.58277	5.46086	4.02765	5.76448	5.7261	4.19567	6.56517	1.64574	1.81695	chr5	76369649	76381045	+	3	circRNA	-	ENSSSCT00000000859	PPHLN1	mRNA	chr5:76358338-76369648|chr5:76381045-76391198	periphilin 1 [Source:HGNC Symbol;Acc:HGNC:19369]	GO:0005829(cytosol);GO:0005794(Golgi apparatus);GO:0005654(nucleoplasm);GO:0003723(RNA binding)	NA
circRNA1236	146.5	208.5	195	157.5	107	133.5	124	147.5	153	28	27	21	6.13004	8.40691	7.77867	6.55288	4.75457	6.12921	5.68034	4.68979	6.54675	0.768328	0.715527	0.613124	chr5	89450455	89471342	-	8	circRNA	-	ENSSSCT00000033603	ENSSSCG00000000884	mRNA	chr5:89445308-89450454|chr5:89471342-89475082	NA	GO:0043293(apoptosome);GO:0005737(cytoplasm);GO:0097190(apoptotic signaling pathway);GO:0042981(regulation of apoptotic process);GO:0008635(activation of cysteine-type endopeptidase activity involved in apoptotic process by cytochrome c);GO:0006915(apoptotic process);GO:0043531(ADP binding);GO:0008656(cysteine-type endopeptidase activator activity involved in apoptotic process);GO:0005524(ATP bin…	04210(Apoptosis);04115(p53 signaling pathway);05222(Small cell lung cancer);05010(Alzheimer's disease);05012(Parkinson's disease);05014(Amyotrophic lateral sclerosis (ALS));05016(Huntington's disease);05134(Legionellosis);05152(Tuberculosis);05161(Hepatitis B)
circRNA1237	14.4	17.25	10.25	12.4	13.3929	10.1111	17.0643	21.9	15.5714	4	4.5	2.25	1.57757	1.82104	1.07052	1.35075	1.55812	1.21541	2.04664	1.82308	1.74447	0.287375	0.31223	0.171993	chr5	89495676	89500260	-	3	circRNA	-	ENSSSCT00000000968	ENSSSCG00000000884	mRNA	chr5:89489125-89495675|chr5:89500260-89551094	NA	GO:0043293(apoptosome);GO:0005737(cytoplasm);GO:0097190(apoptotic signaling pathway);GO:0042981(regulation of apoptotic process);GO:0008635(activation of cysteine-type endopeptidase activity involved in apoptotic process by cytochrome c);GO:0006915(apoptotic process);GO:0043531(ADP binding);GO:0008656(cysteine-type endopeptidase activator activity involved in apoptotic process);GO:0005524(ATP bin…	04210(Apoptosis);04115(p53 signaling pathway);05222(Small cell lung cancer);05010(Alzheimer's disease);05012(Parkinson's disease);05014(Amyotrophic lateral sclerosis (ALS));05016(Huntington's disease);05134(Legionellosis);05152(Tuberculosis);05161(Hepatitis B)
circRNA1238	22.4833	18.25	17.0667	18.8167	13.7262	16.2778	19.231	22.9833	19.0714	8.16667	8.5	1.41667	2.46312	1.92661	1.78246	2.04972	1.5969	1.95667	2.3065	1.91326	2.13657	0.586723	0.589768	0.108292	chr5	89540810	89545223	-	3	circRNA	-	ENSSSCT00000033603	ENSSSCG00000000884	mRNA	chr5:89534883-89540809|chr5:89545223-89551094	NA	GO:0043293(apoptosome);GO:0005737(cytoplasm);GO:0097190(apoptotic signaling pathway);GO:0042981(regulation of apoptotic process);GO:0008635(activation of cysteine-type endopeptidase activity involved in apoptotic process by cytochrome c);GO:0006915(apoptotic process);GO:0043531(ADP binding);GO:0008656(cysteine-type endopeptidase activator activity involved in apoptotic process);GO:0005524(ATP bin…	04210(Apoptosis);04115(p53 signaling pathway);05222(Small cell lung cancer);05010(Alzheimer's disease);05012(Parkinson's disease);05014(Amyotrophic lateral sclerosis (ALS));05016(Huntington's disease);05134(Legionellosis);05152(Tuberculosis);05161(Hepatitis B)
circRNA1239	46.9333	87.3	90.9667	49.05	58.2762	58.1333	43.1143	84.3	69.1381	34.3667	57.2	47.0667	2.36224	4.2341	4.36485	2.45475	3.11483	3.21044	2.37569	3.22407	3.55851	1.13434	1.82337	1.65295	chr5	89551095	89558759	-	5	circRNA	-	ENSSSCT00000033603	ENSSSCG00000000884	mRNA	chr5:89545223-89551094|chr5:89558759-89561650	NA	GO:0043293(apoptosome);GO:0005737(cytoplasm);GO:0097190(apoptotic signaling pathway);GO:0042981(regulation of apoptotic process);GO:0008635(activation of cysteine-type endopeptidase activity involved in apoptotic process by cytochrome c);GO:0006915(apoptotic process);GO:0043531(ADP binding);GO:0008656(cysteine-type endopeptidase activator activity involved in apoptotic process);GO:0005524(ATP bin…	04210(Apoptosis);04115(p53 signaling pathway);05222(Small cell lung cancer);05010(Alzheimer's disease);05012(Parkinson's disease);05014(Amyotrophic lateral sclerosis (ALS));05016(Huntington's disease);05134(Legionellosis);05152(Tuberculosis);05161(Hepatitis B)
circRNA124	50	8	33	11	31	13	17	19	10	76	62	7	3.29002	0.507251	2.07008	0.719693	2.16616	0.938575	1.22463	0.949986	0.672879	3.27948	2.58379	0.321388	chr4	123208673	123209313	-	1	circRNA	-	ENSSSCT00000007505	NTNG1	mRNA	chr4:123135890-123208672|chr4:123209313-123210232	netrin G1 [Source:HGNC Symbol;Acc:HGNC:23319]	GO:0046658(anchored component of plasma membrane);GO:0016021(integral component of membrane);GO:0016020(membrane);GO:0005886(plasma membrane);GO:0007409(axonogenesis)	NA
circRNA1240	69.5	84	62.5	78	56	85	35.5	36	17.5	13	30	30.5	10.1432	11.8133	8.69588	11.319	8.67917	13.6115	5.6721	3.99233	2.61177	1.24421	2.77298	3.10593	chr5	93402670	93405323	+	2	circRNA	-	ENSSSCT00000000991	PLXNC1	mRNA	chr5:93402547-93402669|chr5:93405323-93408543	plexin C1 [Source:HGNC Symbol;Acc:HGNC:9106]	GO:0016021(integral component of membrane);GO:0016020(membrane);GO:0071526(semaphorin-plexin signaling pathway);GO:0007165(signal transduction);GO:0017154(semaphorin receptor activity);GO:0050772(positive regulation of axonogenesis);GO:0043087(regulation of GTPase activity);GO:0008360(regulation of cell shape);GO:0007162(negative regulation of cell adhesion)	NA
circRNA1241	1	18	13	15	15	29	16	36	25	0	0	0	0.0987775	1.71331	1.22418	1.47325	1.57344	3.14307	1.73024	2.70207	2.52527	0	0	0	chr5	97653518	97653944	+	1	circRNA	-	ENSSSCT00000001006	ENSSSCG00000027898	mRNA	chr5:97597238-97653517|chr5:97653944-97667032	plasma membrane calcium-transporting ATPase 1 [Source:RefSeq peptide;Acc:NP_999517]	GO:0016021(integral component of membrane);GO:0016020(membrane);GO:0099132(ATP hydrolysis coupled cation transmembrane transport);GO:0070588(calcium ion transmembrane transport);GO:0006816(calcium ion transport);GO:0006811(ion transport);GO:0006810(transport);GO:0046872(metal ion binding);GO:0016787(hydrolase activity);GO:0005524(ATP binding);GO:0005388(calcium-transporting ATPase activity);GO:00…	04020(Calcium signaling pathway);04024(cAMP signaling pathway);04022(cGMP - PKG signaling pathway);04261(Adrenergic signaling in cardiomyocytes);04970(Salivary secretion);04972(Pancreatic secretion)
circRNA1242	41	14	0	22	19	13	28	48.5	32	0	43	1	4.91278	1.6165	0	2.62115	2.41768	1.70917	3.67307	4.41591	3.92105	0	3.26324	0.0836078	chr5	97863726	97869281	-	2	circRNA	-	ENSSSCT00000001004	ENSSSCG00000000920	mRNA	chr5:97814884-97863725|chr5:97869281-97889413	NA	NA	NA
circRNA1243	0	0	0	9	5	13	12	0	16	0	0	0	0	0	0	1.05727	0.627321	1.68523	1.55212	0	1.93307	0	0	0	chr5	105106633	105109234	+	2	circRNA	-	ENSSSCT00000001028	PPFIA2	mRNA	chr5:105101326-105106632|chr5:105109234-105116284	PTPRF interacting protein alpha 2 [Source:HGNC Symbol;Acc:HGNC:9246]	GO:0070062(extracellular exosome);GO:0045202(synapse)	NA
circRNA1244	156.15	217.45	182.4	104.1	135.545	139.267	69.7238	98.6976	73.681	21	46.3667	28.6667	14.0428	18.8442	15.6381	9.30873	12.9449	13.7423	6.8647	6.74459	6.77606	1.2385	2.64092	1.79884	chr5	105210066	105265163	-	5	circRNA	-	ENSSSCT00000001027	ACSS3	mRNA	chr5:105198927-105210065|chr5:105265163-105276875	acyl-CoA synthetase short-chain family member 3 [Source:HGNC Symbol;Acc:HGNC:24723]	GO:0005739(mitochondrion);GO:0008152(metabolic process);GO:0003824(catalytic activity)	00640(Propanoate metabolism)
circRNA1245	127.75	146.75	110.333	80.3333	84.8452	92.6667	54.2381	91.2976	58.9048	21	43.1667	25.1667	14.7623	16.3409	12.1547	9.23029	10.4117	11.7494	6.86159	8.01656	6.96069	1.59139	3.15921	2.02919	chr5	105210066	105250420	-	4	circRNA	-	ENSSSCT00000001027	ACSS3	mRNA	chr5:105198927-105210065|chr5:105250420-105265059	acyl-CoA synthetase short-chain family member 3 [Source:HGNC Symbol;Acc:HGNC:24723]	GO:0005739(mitochondrion);GO:0008152(metabolic process);GO:0003824(catalytic activity)	00640(Propanoate metabolism)
circRNA1246	108.4	107.333	93.5833	56.0333	51.7667	83.6833	37.0524	63.45	38.8262	2.66667	17.7167	15.0833	5.83175	5.56428	4.7997	2.99739	2.95748	4.93977	2.1823	2.5938	2.13601	0.094081	0.603655	0.566201	chr5	105296613	105332428	-	7	circRNA	-	ENSSSCT00000001027	ACSS3	mRNA	chr5:105277027-105296612|chr5:105332428-105367973	acyl-CoA synthetase short-chain family member 3 [Source:HGNC Symbol;Acc:HGNC:24723]	GO:0005739(mitochondrion);GO:0008152(metabolic process);GO:0003824(catalytic activity)	00640(Propanoate metabolism)
circRNA1247	888.5	1083.25	1244.5	795.5	935	1019.5	1196.5	1714.5	1364	293.5	410.5	202	78.5643	92.2999	104.908	69.9414	87.7973	98.9128	115.826	115.197	123.336	17.0192	22.9889	12.463	chr4	2173289	2233356	-	3	circRNA	-	ENSSSCT00000032996	PTK2	mRNA	None|chr4:2233356-2245193	NA	GO:0060267(positive regulation of respiratory burst);GO:0007229(integrin-mediated signaling pathway);GO:0002741(positive regulation of cytokine secretion involved in immune response);GO:0005856(cytoskeleton)	NA
circRNA1248	309.967	375.044	355.417	264.967	275.617	353.783	129.667	242.767	101.928	151.533	103.917	124.367	8.84559	10.3133	9.66929	7.51847	8.35255	11.0776	4.05105	5.26425	2.97449	2.83585	1.87817	2.47639	chr4	2565801	2631285	+	7	circRNA	-	ENSSSCT00000034449	TRAPPC9	mRNA	None|chr4:2631285-2657408	trafficking protein particle complex 9 [Source:HGNC Symbol;Acc:HGNC:30832]	GO:0005802(trans-Golgi network);GO:0005737(cytoplasm);GO:0051092(positive regulation of NF-kappaB transcription factor activity);GO:0030182(neuron differentiation);GO:0021987(cerebral cortex development)	NA
circRNA1249	227.3	263.544	257.25	164.8	190.117	212.783	86.25	152.267	68.9278	77.8667	44.25	72.0333	8.58287	9.5894	9.26048	6.18752	7.62351	8.81593	3.56549	4.36891	2.66156	1.92818	1.05824	1.89788	chr4	2565801	2609139	+	5	circRNA	-	ENSSSCT00000034449	TRAPPC9	mRNA	None|chr4:2609139-2625059	trafficking protein particle complex 9 [Source:HGNC Symbol;Acc:HGNC:30832]	GO:0005802(trans-Golgi network);GO:0005737(cytoplasm);GO:0051092(positive regulation of NF-kappaB transcription factor activity);GO:0030182(neuron differentiation);GO:0021987(cerebral cortex development)	NA
circRNA125	35	20	13	43	55	77	31	82	42	87	22	45	5.46752	3.01063	1.93603	6.67909	9.12403	13.1981	5.30165	9.73356	6.70935	8.91261	2.17662	4.90499	chr4	129543453	129544482	+	2	circRNA	-	ENSSSCT00000007519	DBT	mRNA	chr4:129539754-129543452|chr4:129544482-129544755	dihydrolipoamide branched chain transacylase E2 [Source:HGNC Symbol;Acc:HGNC:2698]	GO:0042645(mitochondrial nucleoid);GO:0005739(mitochondrion);GO:0008152(metabolic process);GO:0031625(ubiquitin protein ligase binding);GO:0016746(transferase activity, transferring acyl groups);GO:0016740(transferase activity)	00280(Valine, leucine and isoleucine degradation)
circRNA1250	20.8	25.4	11.25	19.05	22.5	14.2	4.75	20.6	11.15	9.45	28.3333	26.45	3.53751	4.16268	1.82403	3.22148	4.06367	2.64984	0.884413	2.66218	1.93918	1.05397	3.05189	3.1388	chr4	2602892	2609139	+	2	circRNA	-	ENSSSCT00000034449	TRAPPC9	mRNA	chr4:2579021-2602891|chr4:2609139-2625059	trafficking protein particle complex 9 [Source:HGNC Symbol;Acc:HGNC:30832]	GO:0005802(trans-Golgi network);GO:0005737(cytoplasm);GO:0051092(positive regulation of NF-kappaB transcription factor activity);GO:0030182(neuron differentiation);GO:0021987(cerebral cortex development)	NA
circRNA1251	29.4667	19.7333	26.6667	27.8667	34	64.2	31.6667	76.6	23.4	91.3667	62.6667	60.5333	3.44278	2.22169	2.97025	3.23735	4.21851	8.23022	4.0505	6.80053	2.79578	7.00051	4.63716	4.93488	chr4	2625060	2631285	+	2	circRNA	-	ENSSSCT00000034449	TRAPPC9	mRNA	chr4:2609139-2625059|chr4:2631285-2657408	trafficking protein particle complex 9 [Source:HGNC Symbol;Acc:HGNC:30832]	GO:0005802(trans-Golgi network);GO:0005737(cytoplasm);GO:0051092(positive regulation of NF-kappaB transcription factor activity);GO:0030182(neuron differentiation);GO:0021987(cerebral cortex development)	NA
circRNA1252	7	0	21	7	3	0	23	0	4	0	0	0	1.57886	0	4.51553	1.56989	0.718567	0	5.67936	0	0.9226	0	0	0	chr4	15790038	15790325	+	2	circRNA	-	ENSSSCT00000029865	TATDN1	mRNA	chr4:15787988-15790037|chr4:15790325-15803252	TatD DNase domain containing 1 [Source:HGNC Symbol;Acc:HGNC:24220]	GO:0005654(nucleoplasm);GO:0006308(DNA catabolic process);GO:0016888(endodeoxyribonuclease activity, producing 5'-phosphomonoesters);GO:0016788(hydrolase activity, acting on ester bonds);GO:0004536(deoxyribonuclease activity)	NA
circRNA1253	103	92	50	98	66	65	118	180.5	193	284	194	210	13.0461	11.2288	6.0375	12.3422	8.87744	9.03343	16.3626	17.3722	24.9982	23.5898	15.5625	18.5594	chr4	16785783	16789839	+	3	circRNA	-	ENSSSCT00000006566	ATAD2	mRNA	chr4:16779552-16785782|chr4:16789839-16793505	ATPase family, AAA domain containing 2 [Source:HGNC Symbol;Acc:HGNC:30123]	GO:0070062(extracellular exosome);GO:0005654(nucleoplasm);GO:0005634(nucleus);GO:0045944(positive regulation of transcription from RNA polymerase II promoter);GO:0045893(positive regulation of transcription, DNA-templated);GO:0031936(negative regulation of chromatin silencing);GO:0006355(regulation of transcription, DNA-templated);GO:0006325(chromatin organization);GO:0042393(histone binding);GO:…	NA
circRNA1254	14	13	11	18	11	16	4	11	0	0	0	4	1.13556	1.01609	0.850591	1.45172	0.947496	1.42397	0.355198	0.677971	0	0	0	0.226384	chr4	19841216	19852793	-	4	circRNA	-	ENSSSCT00000035287	COL14A1	mRNA	chr4:19832771-19841215|chr4:19852793-19860653	collagen type XIV alpha 1 chain [Source:HGNC Symbol;Acc:HGNC:2191]	GO:0005615(extracellular space);GO:0070062(extracellular exosome);GO:0031012(extracellular matrix);GO:0003723(RNA binding)	04974(Protein digestion and absorption)
circRNA1255	26	17	8	28	43	26	37	76	40	0	20	0	2.2065	1.39022	0.647239	2.36273	3.87525	2.42103	3.43763	4.90093	3.47135	0	1.07497	0	chr4	20042957	20052708	-	4	circRNA	-	ENSSSCT00000034055	DEPTOR	mRNA	chr4:19994297-20042956|chr4:20052708-20085496	DEP domain containing MTOR interacting protein [Source:HGNC Symbol;Acc:HGNC:22953]	GO:0005622(intracellular);GO:0035556(intracellular signal transduction);GO:0005737(cytoplasm);GO:2001236(regulation of extrinsic apoptotic signaling pathway);GO:0045792(negative regulation of cell size);GO:0032007(negative regulation of TOR signaling);GO:0006469(negative regulation of protein kinase activity)	NA
circRNA1256	0	0	0	4	12	13	4	3	20	0	0	0	0	0	0	0.676427	2.16729	2.42591	0.744769	0.387696	3.47835	0	0	0	chr4	27724430	27726363	+	2	circRNA	-	ENSSSCT00000032782	ENSSSCG00000031031	mRNA	chr4:27715011-27724429|chr4:27726363-27738945	NA	GO:0016021(integral component of membrane);GO:0016020(membrane)	NA
circRNA1257	1.33333	0	0	3	6.66667	3.66667	10.3333	13.3333	14.6667	0	0	0	0.127234	0	0	0.28465	0.675576	0.383913	1.07952	0.966803	1.43121	0	0	0	chr4	35565212	35569895	+	3	circRNA	-	ENSSSCT00000006629	DPYS	mRNA	chr4:35550717-35565211|chr4:35569895-35602619	dihydropyrimidinase [Source:HGNC Symbol;Acc:HGNC:3013]	GO:0070062(extracellular exosome);GO:0005737(cytoplasm);GO:0006212(uracil catabolic process);GO:0006208(pyrimidine nucleobase catabolic process);GO:0051219(phosphoprotein binding);GO:0016810(hydrolase activity, acting on carbon-nitrogen (but not peptide) bonds);GO:0016787(hydrolase activity);GO:0004157(dihydropyrimidinase activity)	00240(Pyrimidine metabolism);00410(beta-Alanine metabolism);00770(Pantothenate and CoA biosynthesis);00983(Drug metabolism - other enzymes)
circRNA1258	74	38	23	55	65	92.6	244	215	160	235	119	74	9.84597	4.87209	2.91743	7.27639	9.18421	13.5187	35.5422	21.7371	21.7699	20.5049	10.0279	6.87008	chr4	37102480	37103948	+	3	circRNA	-	ENSSSCT00000024569	AZIN1	mRNA	chr4:37102004-37102479|chr4:37103948-37105765	antizyme inhibitor 1 [Source:HGNC Symbol;Acc:HGNC:16432]	GO:0005737(cytoplasm);GO:0005634(nucleus);GO:1902269(positive regulation of polyamine transmembrane transport);GO:0043085(positive regulation of catalytic activity);GO:0042177(negative regulation of protein catabolic process);GO:0033387(putrescine biosynthetic process from ornithine);GO:0006596(polyamine biosynthetic process);GO:0042978(ornithine decarboxylase activator activity);GO:0003824(catal…	NA
circRNA1259	9	4.5	2	6.5	6	4.33333	0	1.83333	8.66667	0	1.5	3	1.95671	0.942761	0.414534	1.40515	1.38528	1.03372	0	0.302873	1.92684	0	0.206544	0.455102	chr4	55211975	55212711	-	2	circRNA	-	ENSSSCT00000006728	CPNE3	mRNA	chr4:55205042-55211974|chr4:55212711-55214191	copine 3 [Source:HGNC Symbol;Acc:HGNC:2316]	GO:0070062(extracellular exosome);GO:0030054(cell junction);GO:0005925(focal adhesion);GO:0005886(plasma membrane);GO:0005829(cytosol);GO:0005739(mitochondrion);GO:0005737(cytoplasm);GO:0005730(nucleolus);GO:0005634(nucleus);GO:0071363(cellular response to growth factor stimulus);GO:0071277(cellular response to calcium ion);GO:0038128(ERBB2 signaling pathway);GO:0030335(positive regulation of cel…	NA
circRNA126	21.0833	34.5833	54.6667	25.5	16	30.0833	82.75	128.75	91.9167	164.583	101.75	104.583	3.65948	5.78431	9.04582	4.40095	2.94918	5.72932	15.7244	16.981	16.3148	18.7339	11.1854	12.6662	chr4	129639341	129642250	-	2	circRNA	-	ENSSSCT00000007523	ENSSSCG00000006870	mRNA	chr4:129636841-129639340|chr4:129642250-129643257	NA	GO:0016021(integral component of membrane);GO:0016020(membrane);GO:0055085(transmembrane transport);GO:0005215(transporter activity)	NA
circRNA1260	12	12.5	16	7.5	8	38.5	7.5	17.5	14.5	1.5	44.5	27	1.34254	1.3476	1.70651	0.834319	0.950466	4.7261	0.918615	1.48771	1.6589	0.110052	3.15313	2.10771	chr4	70757387	70758582	+	2	circRNA	-	ENSSSCT00000006788	NCOA2	mRNA	chr4:70755712-70757386|chr4:70758582-70761923	nuclear receptor coactivator 2 [Source:RefSeq peptide;Acc:NP_001107747]	GO:0005634(nucleus);GO:0045944(positive regulation of transcription from RNA polymerase II promoter);GO:0032870(cellular response to hormone stimulus);GO:0030522(intracellular receptor signaling pathway);GO:0006355(regulation of transcription, DNA-templated);GO:0035257(nuclear hormone receptor binding);GO:0030374(ligand-dependent nuclear receptor transcription coactivator activity);GO:0016922(lig…	04919(Thyroid hormone signaling pathway)
circRNA1261	34	62	85	66	38	18	0	52	52	64	10	83	3.81397	6.70185	9.08997	7.36154	4.52672	2.21548	0	4.43238	5.965	4.70805	0.710453	6.4965	chr4	88687143	88703801	+	3	circRNA	-	ENSSSCT00000006882	ENSSSCG00000006282	mRNA	chr4:88676666-88687142|chr4:88703801-88733884	NA	GO:0005871(kinesin complex);GO:0019894(kinesin binding)	NA
circRNA1262	28	10.5	23	16	20	41.5	25	56	51	56	26	48.5	3.87208	1.3992	3.03221	2.20005	2.93709	6.29697	3.78489	5.8845	7.21216	5.07852	2.27718	4.67984	chr4	91138990	91140914	+	2	circRNA	-	ENSSSCT00000006913	CREG1	mRNA	chr4:91134572-91138989|chr4:91140914-91144060	cellular repressor of E1A stimulated genes 1 [Source:HGNC Symbol;Acc:HGNC:2351]	GO:0070062(extracellular exosome);GO:0005667(transcription factor complex);GO:0005615(extracellular space);GO:0055114(oxidation-reduction process);GO:0006355(regulation of transcription, DNA-templated);GO:0016491(oxidoreductase activity);GO:0010181(FMN binding);GO:0008134(transcription factor binding)	NA
circRNA1263	562	512	381	314	354	278	121	289	187	107	168	40	32.7857	28.7821	21.1894	18.2139	21.9307	17.7947	7.72788	12.8109	11.1557	4.0935	6.20718	1.62821	chr4	97105147	97107945	-	7	circRNA	-	ENSSSCT00000006967	NDUFS2	mRNA	chr4:97104611-97105146|chr4:97107945-97109752	NADH:ubiquinone oxidoreductase core subunit S2 [Source:HGNC Symbol;Acc:HGNC:7708]	GO:0005747(mitochondrial respiratory chain complex I);GO:0005739(mitochondrion);GO:0005654(nucleoplasm);GO:0055114(oxidation-reduction process);GO:0006979(response to oxidative stress);GO:0051287(NAD binding);GO:0048038(quinone binding);GO:0031625(ubiquitin protein ligase binding);GO:0016651(oxidoreductase activity, acting on NAD(P)H);GO:0016491(oxidoreductase activity);GO:0003954(NADH dehydrogen…	00190(Oxidative phosphorylation);05010(Alzheimer's disease);05012(Parkinson's disease);05016(Huntington's disease);04932(Non-alcoholic fatty liver disease (NAFLD))
circRNA1264	26	35	17	19	4	33	7	25	1	43	10	28	2.87075	3.72388	1.78944	2.08594	0.469013	3.99792	0.846151	2.09748	0.11291	3.11354	0.699294	2.15717	chr4	97952915	97953394	-	2	circRNA	-	ENSSSCT00000006996	VANGL2	mRNA	chr4:97951058-97952914|chr4:97953394-97970713	VANGL planar cell polarity protein 2 [Source:HGNC Symbol;Acc:HGNC:15511]	GO:0071944(cell periphery);GO:0060187(cell pole);GO:0030134(ER to Golgi transport vesicle);GO:0016328(lateral plasma membrane);GO:0016324(apical plasma membrane);GO:0016323(basolateral plasma membrane);GO:0016021(integral component of membrane);GO:0016020(membrane);GO:0005911(cell-cell junction);GO:0005886(plasma membrane);GO:0001725(stress fiber);GO:1905515(non-motile cilium assembly);GO:1904938…	04310(Wnt signaling pathway)
circRNA1265	66.5	62	59	43	45	38.5	56	89.5	64	42	48	86	8.10647	7.28293	6.85658	5.212	5.82538	5.14954	7.47352	8.29027	7.97809	3.35755	3.70585	7.31495	chr4	98051660	98053981	+	3	circRNA	-	ENSSSCT00000006999	COPA	mRNA	chr4:98044805-98051659|chr4:98053981-98055530	coatomer protein complex subunit alpha [Source:HGNC Symbol;Acc:HGNC:2230]	GO:0070062(extracellular exosome);GO:0030126(COPI vesicle coat);GO:0030117(membrane coat);GO:0016020(membrane);GO:0005794(Golgi apparatus);GO:0005737(cytoplasm);GO:0005615(extracellular space);GO:0000139(Golgi membrane);GO:0030157(pancreatic juice secretion);GO:0016192(vesicle-mediated transport);GO:0015031(protein transport);GO:0006891(intra-Golgi vesicle-mediated transport);GO:0006890(retrograd…	04080(Neuroactive ligand-receptor interaction)
circRNA1266	4	0	0	20	40	23	68	97	35	0	0	0	0.739965	0	0	3.67881	7.85802	4.66849	13.7717	13.6351	6.62107	0	0	0	chr4	104086483	104087316	-	2	circRNA	-	ENSSSCT00000007171	TDRD10	mRNA	chr4:104063904-104086482|chr4:104087316-104103358	tudor domain-containing protein 10 [Source:RefSeq peptide;Acc:NP_001233127]	GO:0003676(nucleic acid binding);GO:0000166(nucleotide binding)	NA
circRNA1267	11.5	20	22	14.5	23.5	15	28	55.5	24	65	65	23.5	1.90963	3.20027	3.48273	2.39412	4.14402	2.73301	5.09023	7.00295	4.07542	7.0783	6.83601	2.72285	chr4	107452771	107455547	-	2	circRNA	-	ENSSSCT00000007277	PRUNE1	mRNA	chr4:107449048-107452770|chr4:107455547-107457171	prune exopolyphosphatase [Source:HGNC Symbol;Acc:HGNC:13420]	GO:0005829(cytosol);GO:0005737(cytoplasm);GO:0016462(pyrophosphatase activity)	00230(Purine metabolism)
circRNA1268	35	3	18	28	32	73	50	50	77	0	23	3	7.93672	0.65554	3.89127	6.31332	7.70593	18.1632	12.4128	8.61546	17.8555	0	3.30322	0.474676	chr4	109281907	109283828	+	2	circRNA	-	ENSSSCT00000029430	ENSSSCG00000021304	mRNA	chr4:109268533-109281906|chr4:109283828-109284953	NA	GO:0032580(Golgi cisterna membrane);GO:0016021(integral component of membrane);GO:0016020(membrane);GO:1903959(regulation of anion transmembrane transport);GO:0051452(intracellular pH reduction);GO:0008308(voltage-gated anion channel activity)	NA
circRNA1269	7	28	26	32	35	38	87	101	89	138	72	24	0.779013	3.00268	2.75845	3.54098	4.13634	4.64011	10.5997	8.5409	10.1285	10.0714	5.07477	1.86364	chr4	110469861	110472174	-	3	circRNA	-	ENSSSCT00000007347	ENSSSCG00000006707	mRNA	chr4:110460434-110469860|chr4:110472174-110472499	NA	GO:0005815(microtubule organizing center)	NA
circRNA127	34	32	17	24	16	21	54	37	50	68	20	20	3.24446	2.94251	1.54653	2.2772	1.62138	2.19877	5.64137	2.68288	4.87913	4.25536	1.20873	1.33167	chr4	135699050	135702242	-	4	circRNA	-	ENSSSCT00000007553	MTF2	mRNA	chr4:135659562-135699049|chr4:135702242-135706804	metal response element binding transcription factor 2 [Source:HGNC Symbol;Acc:HGNC:29535]	GO:0046872(metal ion binding);GO:0008270(zinc ion binding);GO:0035098(ESC/E(Z) complex);GO:0005737(cytoplasm);GO:0005634(nucleus);GO:0061087(positive regulation of histone H3-K27 methylation);GO:0061086(negative regulation of histone H3-K27 methylation);GO:0048863(stem cell differentiation);GO:0045944(positive regulation of transcription from RNA polymerase II promoter);GO:0019827(stem cell popul…	NA
circRNA1270	37	19	104	64	44	141	62	39	68	0	25	68	4.9859	2.46718	13.3604	8.57527	6.29646	20.8477	9.14662	3.99339	9.37043	0	2.13363	6.39372	chr4	113244529	113255612	-	3	circRNA	-	ENSSSCT00000007372	MAN1A2	mRNA	chr4:113228605-113244528|chr4:113255612-113269352	mannosidase alpha class 1A member 2 [Source:HGNC Symbol;Acc:HGNC:6822]	GO:0070062(extracellular exosome);GO:0016021(integral component of membrane);GO:0016020(membrane);GO:0005794(Golgi apparatus);GO:0005783(endoplasmic reticulum);GO:0000139(Golgi membrane);GO:0048286(lung alveolus development);GO:0009100(glycoprotein metabolic process);GO:0008152(metabolic process);GO:0007585(respiratory gaseous exchange);GO:0006491(N-glycan processing);GO:0016798(hydrolase activit…	00510(N-Glycan biosynthesis);04141(Protein processing in endoplasmic reticulum)
circRNA1271	36	16	19	36	33	43	24	60	57	113	41	70	5.09533	2.1822	2.56371	5.06639	4.96004	6.67784	3.71885	6.45292	8.24999	10.4885	3.67528	6.91307	chr4	114796951	114798413	-	2	circRNA	-	ENSSSCT00000007388	SLC22A15	mRNA	chr4:114790573-114796950|chr4:114798413-114827395	solute carrier family 22 member 15 [Source:HGNC Symbol;Acc:HGNC:20301]	GO:0016021(integral component of membrane);GO:0016020(membrane);GO:0055085(transmembrane transport);GO:0015711(organic anion transport);GO:0022857(transmembrane transporter activity);GO:0008514(organic anion transmembrane transporter activity)	NA
circRNA1272	247	184	294.333	98.5	122	137.5	256	251	242.5	95	128.5	132.5	20.2684	14.5494	23.0254	8.03684	10.6313	12.3801	22.998	15.6506	20.349	5.11222	6.67826	7.58651	chr4	116307640	116337100	+	4	circRNA	-	ENSSSCT00000007402	ENSSSCG00000006757	mRNA	chr4:116244730-116307639|chr4:116337100-116341167	NA	GO:0005622(intracellular);GO:0046872(metal ion binding);GO:0008270(zinc ion binding)	NA
circRNA1273	8	25	0	13	11	10	10	16	4	0	0	0	0.69572	2.09502	0	1.12412	1.01587	0.954205	0.952076	1.0573	0.355724	0	0	0	chr4	121407376	121409555	-	4	circRNA	-	ENSSSCT00000007487	KIAA1324	mRNA	chr4:121400422-121407375|chr4:121409555-121414696	KIAA1324 [Source:HGNC Symbol;Acc:HGNC:29618]	GO:0070062(extracellular exosome);GO:0016021(integral component of membrane);GO:0016020(membrane);GO:0005887(integral component of plasma membrane);GO:0005886(plasma membrane);GO:0005802(trans-Golgi network);GO:0005770(late endosome);GO:0005764(lysosome);GO:2000786(positive regulation of autophagosome assembly);GO:0044090(positive regulation of vacuole organization);GO:0009267(cellular response t…	NA
circRNA1274	3	5	12	29	30	49	89	142	83	20	27	0	0.348579	0.559827	1.32925	3.35046	3.70171	6.24702	11.3213	12.5373	9.86203	1.52396	1.98692	0	chr4	121581861	121582456	+	2	circRNA	-	ENSSSCT00000007492	ENSSSCG00000006841	mRNA	chr4:121579909-121581860|chr4:121582456-121583797	NA	GO:0016021(integral component of membrane);GO:0016020(membrane)	NA
circRNA1275	0	0	0	5	15	32	23	19	16	0	0	0	0	0	0	1.14586	3.67137	8.0925	5.8035	3.32755	3.77106	0	0	0	chr4	130830431	130830613	-	1	circRNA	-	ENSSSCT00000007531	ENSSSCG00000006877	mRNA	chr4:130824107-130830430|chr4:130830613-130856817	NA	GO:0019898(extrinsic component of membrane);GO:0005768(endosome);GO:0016050(vesicle organization);GO:0006897(endocytosis);GO:0035091(phosphatidylinositol binding)	NA
circRNA1276	18	12	11	20	10.5	29	20	29	11.5	0	31	3	1.55256	0.997386	0.904514	1.71527	0.961763	2.74456	1.88858	1.90069	1.01434	0	1.69346	0.180552	chr4	132111911	132131114	+	3	circRNA	-	ENSSSCT00000007532	DPYD	mRNA	chr4:132023793-132111910|chr4:132131114-132153337	dihydropyrimidine dehydrogenase [Source:RefSeq peptide;Acc:NP_999209]	GO:0005829(cytosol);GO:0005737(cytoplasm);GO:0055114(oxidation-reduction process);GO:0006214(thymidine catabolic process);GO:0006212(uracil catabolic process);GO:0006210(thymine catabolic process);GO:0006208(pyrimidine nucleobase catabolic process);GO:0006145(purine nucleobase catabolic process);GO:0051536(iron-sulfur cluster binding);GO:0042803(protein homodimerization activity);GO:0017113(dihyd…	00240(Pyrimidine metabolism);00410(beta-Alanine metabolism);00770(Pantothenate and CoA biosynthesis);00983(Drug metabolism - other enzymes)
circRNA1277	0	0	0	3	0	0	0	0	0	0	0	0	0	0	0	0.276517	0	0	0	0	0	0	0	0	chr4	134887548	134889260	+	3	circRNA	-	ENSSSCT00000007545	ABCA4	mRNA	chr4:134886537-134887547|chr4:134889260-134902966	ATP binding cassette subfamily A member 4 [Source:HGNC Symbol;Acc:HGNC:34]	GO:0043231(intracellular membrane-bounded organelle);GO:0016021(integral component of membrane);GO:0016020(membrane);GO:0005887(integral component of plasma membrane);GO:0001750(photoreceptor outer segment);GO:0055085(transmembrane transport);GO:0045494(photoreceptor cell maintenance);GO:0045332(phospholipid translocation);GO:0007601(visual perception);GO:0006869(lipid transport);GO:0006810(trans…	02010(ABC transporters)
circRNA1278	4.5	8.5	16.5	12	13.5	13	1	30	9	0	0	4.33333	0.825222	1.50204	2.88461	2.18809	2.62902	2.61577	0.200764	4.18037	1.68776	0	0	0.554477	chr4	136071929	136072158	+	1	circRNA	-	ENSSSCT00000022812	ENSSSCG00000006901	mRNA	chr4:136027806-136071928|chr4:136072158-136091307	NA	GO:0012505(endomembrane system);GO:0005622(intracellular);GO:0090630(activation of GTPase activity);GO:0043087(regulation of GTPase activity);GO:0031338(regulation of vesicle fusion);GO:0006886(intracellular protein transport);GO:0017137(Rab GTPase binding);GO:0005096(GTPase activator activity);GO:0043547(positive regulation of GTPase activity)	NA
circRNA1279	33	28	27	20	15	34	28	83	39	16	64	41	3.77202	3.08406	2.94218	2.27309	1.82076	4.26419	3.50385	7.20897	4.55862	1.19934	4.63315	3.26999	chr4	136425709	136431078	-	4	circRNA	-	ENSSSCT00000007559	RPAP2	mRNA	chr4:136412978-136425708|chr4:136431078-136441484	RNA polymerase II associated protein 2 [Source:HGNC Symbol;Acc:HGNC:25791]	GO:0016591(DNA-directed RNA polymerase II, holoenzyme);GO:0005829(cytosol);GO:0005737(cytoplasm);GO:0005730(nucleolus);GO:0005634(nucleus);GO:0070940(dephosphorylation of RNA polymerase II C-terminal domain);GO:0009301(snRNA transcription);GO:0008420(CTD phosphatase activity)	NA
circRNA128	21	4	0	10	7	0	8	3	17	0	19	0	2.48106	0.455389	0	1.17475	0.878249	0	1.03475	0.269324	2.05388	0	1.4217	0	chr3	7336834	7337595	-	2	circRNA	-	ENSSSCT00000008390	STAG3	mRNA	chr3:7330722-7336833|chr3:7337595-7338077	stromal antigen 3 [Source:HGNC Symbol;Acc:HGNC:11356]	GO:0034991(nuclear meiotic cohesin complex);GO:0030893(meiotic cohesin complex);GO:0001673(male germ cell nucleus);GO:0000802(transverse filament);GO:0000800(lateral element);GO:0000795(synaptonemal complex);GO:0000794(condensed nuclear chromosome);GO:0034502(protein localization to chromosome);GO:0007129(synapsis)	04114(Oocyte meiosis)
circRNA1280	185	207.5	237	81	156	188.5	299.5	366	329	165.5	89.5	62	11.325	12.2402	13.8312	4.93036	10.1413	12.6612	20.072	17.0249	20.5955	6.64398	3.46998	2.64827	chr4	141816454	141833754	-	6	circRNA	-	ENSSSCT00000007592	SH3GLB1	mRNA	chr4:141810680-141816453|chr4:141833754-141843325	SH3 domain containing GRB2 like endophilin B1 [Source:HGNC Symbol;Acc:HGNC:10833]	GO:0043234(protein complex);GO:0016020(membrane);GO:0005829(cytosol);GO:0005739(mitochondrion);GO:0005737(cytoplasm);GO:2000786(positive regulation of autophagosome assembly);GO:1903778(protein localization to vacuolar membrane);GO:1900740(positive regulation of protein insertion into mitochondrial membrane involved in apoptotic signaling pathway);GO:0051084('de novo' posttranslational protein fo…	04144(Endocytosis)
circRNA1281	167	244	330	161	138	206	55	135	57	67	0	25	21.9431	30.8941	41.3371	21.0346	19.2558	29.6993	7.91172	13.4788	7.65887	5.77323	0	2.29205	chr3	4820089	4881241	-	2	circRNA	-	ENSSSCT00000029070	ENSSSCG00000021285	mRNA	chr3:4804394-4820088|chr3:4881241-4946356	NA	GO:0046872(metal ion binding)	NA
circRNA1282	1.5	0	8.5	3	0	1	3.5	0	1.5	0	0	0	0.305638	0	1.65113	0.607804	0	0.22357	0.780748	0	0.312547	0	0	0	chr3	5223917	5224972	+	2	circRNA	-	ENSSSCT00000008329	ENSSSCG00000007589	mRNA	chr3:5221398-5223916|chr3:5224972-5229119	NA	NA	NA
circRNA1283	32	9	11	22	10	7	10	0	0.5	0	0	0	6.3366	1.71733	2.07656	4.33167	2.10285	1.5209	2.16787	0	0.101248	0	0	0	chr3	13957642	13957854	+	1	circRNA	-	ENSSSCT00000008471	ENSSSCG00000007726	mRNA	None|None	NA	NA	NA
circRNA1284	36	22	27	39	51	46	32.5	37	21	0	0	4	5.44232	3.20486	3.89127	5.86236	8.18755	7.63022	5.37889	4.25029	3.24646	0	0	0.421935	chr3	16286906	16295464	-	2	circRNA	-	ENSSSCT00000008478	ENSSSCG00000007733	mRNA	chr3:16269343-16286905|chr3:16295464-16325773	NA	GO:0016021(integral component of membrane);GO:0016020(membrane);GO:0055114(oxidation-reduction process);GO:0051536(iron-sulfur cluster binding);GO:0010181(FMN binding);GO:0003824(catalytic activity)	NA
circRNA1285	56.5	40	75	22	52	47	55.5	80.5	34	144.5	221.5	163.5	3.19873	2.1822	4.04796	1.23845	3.12633	2.91961	3.43993	3.46307	1.96842	5.36489	7.94219	6.45878	chr3	17254499	17261734	-	4	circRNA	-	ENSSSCT00000027523	ZNF713	mRNA	chr3:17252255-17254498|chr3:17261734-17274308	zinc finger protein 713 [Source:HGNC Symbol;Acc:HGNC:22043]	GO:0005622(intracellular);GO:0006355(regulation of transcription, DNA-templated);GO:0046872(metal ion binding);GO:0003676(nucleic acid binding)	NA
circRNA1286	0	0	1	14	0	0	0	14	5	0	0	0	0	0	0.140104	2.04578	0	0	0	1.56339	0.75142	0	0	0	chr3	17659999	17660383	-	2	circRNA	-	ENSSSCT00000008501	ENSSSCG00000007754	mRNA	chr3:17659561-17659998|chr3:17660383-17663414	NA	GO:0016021(integral component of membrane);GO:0016020(membrane);GO:0008305(integrin complex);GO:0007229(integrin-mediated signaling pathway);GO:0007155(cell adhesion)	04015(Rap1 signaling pathway);04514(Cell adhesion molecules (CAMs));04145(Phagosome);04810(Regulation of actin cytoskeleton);04640(Hematopoietic cell lineage);04670(Leukocyte transendothelial migration);05202(Transcriptional misregulation in cancers);05133(Pertussis);05134(Legionellosis);05150(Staphylococcus aureus infection);05152(Tuberculosis);05146(Amoebiasis);05140(Leishmaniasis)
circRNA1287	244.9	208.1	264.25	192.383	245.5	293.667	617.006	890.433	656.75	491	396.85	274.1	10.7263	8.78287	11.0337	8.37826	11.4186	14.1128	29.5853	29.6344	29.415	14.1028	11.0084	8.37668	chr3	19058493	19080345	+	6	circRNA	-	ENSSSCT00000008560	XPO6	mRNA	chr3:19052536-19058492|chr3:19080345-19086785	exportin 6 [Source:HGNC Symbol;Acc:HGNC:19733]	GO:0005886(plasma membrane);GO:0005829(cytosol);GO:0005730(nucleolus);GO:0005634(nucleus);GO:0006886(intracellular protein transport);GO:0006611(protein export from nucleus);GO:0008565(protein transporter activity);GO:0008536(Ran GTPase binding)	NA
circRNA1288	20	0	2.5	8.5	2.33333	21.3333	16	45.6667	16.1667	0	0	0	1.35186	0	0.161097	0.571277	0.167487	1.58219	1.18399	2.3455	1.11746	0	0	0	chr3	25435382	25457902	-	4	circRNA	-	ENSSSCT00000008598	ENSSSCG00000007848	mRNA	chr3:25420721-25435381|chr3:25457902-25483313	NA	GO:0043231(intracellular membrane-bounded organelle);GO:0016021(integral component of membrane);GO:0016020(membrane);GO:0055085(transmembrane transport);GO:0006869(lipid transport);GO:0006810(transport);GO:0042626(ATPase activity, coupled to transmembrane movement of substances);GO:0016887(ATPase activity);GO:0005524(ATP binding);GO:0005215(transporter activity);GO:0000166(nucleotide binding)	NA
circRNA1289	0	0	4.5	5	3.5	0	18	16.5	26.5	10.5	8.5	15	0	0	0.891349	1.03297	0.772253	0	4.0944	2.60501	5.63047	1.43068	1.11853	2.17463	chr3	33342594	33345177	-	3	circRNA	-	ENSSSCT00000032425	ATF7IP2	mRNA	chr3:33326907-33342593|chr3:33345177-33359976	activating transcription factor 7 interacting protein 2 [Source:HGNC Symbol;Acc:HGNC:20397]	NA	NA
circRNA129	44	27	43	32	12	64	70	46	58	1	63	14	9.92424	5.86831	9.24609	7.17663	2.87427	15.8388	17.285	7.88384	13.3777	0.147913	8.99957	2.20331	chr3	9520792	9525408	+	2	circRNA	-	ENSSSCT00000008425	PRKRIP1	mRNA	chr3:9519638-9520791|chr3:9525408-9526991	PRKR interacting protein 1 (IL11 inducible) [Source:HGNC Symbol;Acc:HGNC:21894]	GO:0070062(extracellular exosome);GO:0005730(nucleolus);GO:0042326(negative regulation of phosphorylation);GO:0006469(negative regulation of protein kinase activity);GO:0003014(renal system process);GO:0019901(protein kinase binding);GO:0004860(protein kinase inhibitor activity);GO:0003725(double-stranded RNA binding)	NA
circRNA1290	41.879	43.9631	63.1095	47.281	44.7869	69.1488	98.8159	137.471	118.004	36.4619	55.381	26.9853	4.15617	4.20427	5.97087	4.66562	4.72009	7.52973	10.7362	10.3668	11.9758	2.37301	3.48092	1.86865	chr3	42032747	42053774	-	4	circRNA	-	ENSSSCT00000032550	ENSSSCG00000022963	mRNA	chr3:42032554-42032746|chr3:42053774-42066183	NA	GO:0046872(metal ion binding);GO:0008270(zinc ion binding)	NA
circRNA1291	6.25	7.125	2.5	16.5	17.9583	16.125	41.9444	48.1806	31.6806	0	21.6667	20.5139	0.847629	0.931141	0.32323	2.22503	2.58639	2.39951	6.2277	4.96516	4.39367	0	1.86104	1.94123	chr3	42066184	42066875	-	2	circRNA	-	ENSSSCT00000032550	ENSSSCG00000022963	mRNA	chr3:42053774-42066183|chr3:42066875-42077023	NA	GO:0046872(metal ion binding);GO:0008270(zinc ion binding)	NA
circRNA1292	40.5	9	30	44	14	41	21.5	50	55	35	45	0	4.96572	1.06335	3.50666	5.36422	1.82288	5.51581	2.88598	4.65836	6.89603	2.81423	3.49444	0	chr3	45554717	45556311	-	2	circRNA	-	ENSSSCT00000008871	POLR1B	mRNA	chr3:45553048-45554716|chr3:45556311-45557521	RNA polymerase I subunit B [Source:HGNC Symbol;Acc:HGNC:20454]	GO:0005829(cytosol);GO:0005736(DNA-directed RNA polymerase I complex);GO:0005730(nucleolus);GO:0005634(nucleus);GO:0017126(nucleologenesis);GO:0009303(rRNA transcription);GO:0007566(embryo implantation);GO:0006360(transcription from RNA polymerase I promoter);GO:0006351(transcription, DNA-templated);GO:0032549(ribonucleoside binding);GO:0016779(nucleotidyltransferase activity);GO:0016740(transfer…	00230(Purine metabolism);00240(Pyrimidine metabolism);03020(RNA polymerase)
circRNA1293	1	0.666667	0.666667	2.33333	7.66667	9.33333	4.66667	8	8.66667	34.6667	8	26.6667	0.156796	0.100727	0.0996524	0.363778	1.27656	1.60571	0.801065	0.953145	1.38962	3.56459	0.794439	2.91747	chr3	46271692	46271960	+	1	circRNA	-	ENSSSCT00000008879	ENSSSCG00000008105	mRNA	chr3:46269098-46271691|chr3:46271960-46273533	NA	GO:0005680(anaphase-promoting complex)	04120(Ubiquitin mediated proteolysis);04110(Cell cycle);04114(Oocyte meiosis);04914(Progesterone-mediated oocyte maturation);05166(HTLV-I infection)
circRNA1294	25	18.5	8.5	16.5	16.5	11	14	20	16.5	5.5	0	25.5	5.60878	3.99949	1.81799	3.68077	3.9311	2.70781	3.43862	3.40952	3.78548	0.809197	0	3.99183	chr3	57385109	57386816	+	2	circRNA	-	ENSSSCT00000008958	REV1	mRNA	chr3:57369243-57385108|chr3:57386816-57402192	REV1, DNA directed polymerase [Source:HGNC Symbol;Acc:HGNC:14060]	GO:0005634(nucleus);GO:0071897(DNA biosynthetic process);GO:0042276(error-prone translesion synthesis);GO:0009411(response to UV);GO:0006974(cellular response to DNA damage stimulus);GO:0006281(DNA repair);GO:0017125(deoxycytidyl transferase activity);GO:0016779(nucleotidyltransferase activity);GO:0016740(transferase activity);GO:0003684(damaged DNA binding);GO:0003677(DNA binding)	NA
circRNA1295	140	197.25	102.75	119.917	84.1667	125.25	342.75	607.5	348.75	117.5	79.5	69.3333	7.6787	10.4251	5.37263	6.53982	4.90232	7.53763	20.5809	25.3187	19.5606	4.2263	2.76162	2.65341	chr3	58116769	58165903	+	4	circRNA	-	ENSSSCT00000008967	MGAT4A	mRNA	chr3:58112291-58116768|chr3:58165903-58181676	mannosyl (alpha-1,3-)-glycoprotein beta-1,4-N-acetylglucosaminyltransferase, isozyme A [Source:HGNC Symbol;Acc:HGNC:7047]	GO:0070062(extracellular exosome);GO:0016020(membrane);GO:0006487(protein N-linked glycosylation);GO:0005975(carbohydrate metabolic process);GO:0016758(transferase activity, transferring hexosyl groups);GO:0016757(transferase activity, transferring glycosyl groups);GO:0008375(acetylglucosaminyltransferase activity)	00510(N-Glycan biosynthesis)
circRNA1296	16	4	18.3333	16	12.5	12.5	27.5	69	43.5	48.5	1	38.5	2.02657	0.48821	2.21375	2.01506	1.68133	1.7372	3.81331	6.64089	5.6343	4.02853	0.0802193	3.40256	chr3	60832497	60833843	+	2	circRNA	-	ENSSSCT00000008997	RMND5A	mRNA	chr3:60822724-60832496|chr3:60833843-60836183	required for meiotic nuclear division 5 homolog A [Source:HGNC Symbol;Acc:HGNC:25850]	GO:0034657(GID complex);GO:0005737(cytoplasm);GO:0005634(nucleus);GO:0043161(proteasome-mediated ubiquitin-dependent protein catabolic process);GO:0042787(protein ubiquitination involved in ubiquitin-dependent protein catabolic process);GO:0004842(ubiquitin-protein transferase activity)	NA
circRNA1297	56.8333	63.0833	90.6667	66.3667	72.75	41.5	65	93	93.1667	62.1667	47.6833	13.5	4.35839	4.66168	6.62852	5.06057	5.92459	3.49196	5.45713	5.41928	7.30622	3.1264	2.31594	0.722371	chr3	61514538	61527346	-	7	circRNA	-	ENSSSCT00000009007	PTCD3	mRNA	chr3:61512888-61514537|chr3:61527346-61529442	pentatricopeptide repeat domain 3 [Source:HGNC Symbol;Acc:HGNC:24717]	GO:0005886(plasma membrane);GO:0005829(cytosol);GO:0005739(mitochondrion);GO:0005654(nucleoplasm);GO:0032543(mitochondrial translation);GO:0043024(ribosomal small subunit binding);GO:0019843(rRNA binding);GO:0003723(RNA binding)	NA
circRNA1298	40	60	42	39	48	40	47	69.3333	30	115	24	17	2.1089	3.04826	2.11101	2.0445	2.68744	2.31395	2.71282	2.77762	1.61743	3.9761	0.801391	0.625386	chr3	72464696	72471636	-	5	circRNA	-	ENSSSCT00000026747	ENSSSCG00000021579	mRNA	chr3:72456711-72464695|chr3:72471636-72491294	NA	GO:0051492(regulation of stress fiber assembly);GO:0016197(endosomal transport);GO:0051393(alpha-actinin binding)	NA
circRNA1299	17	19.5	23.5	25	34	13	14	28.5	27	39.5	45.5	25	2.74723	3.03658	3.62042	4.01709	5.8348	2.30508	2.47686	3.49966	4.46188	4.18606	4.65687	2.81896	chr3	72742889	72743914	-	2	circRNA	-	ENSSSCT00000009094	CCT7	mRNA	chr3:72740260-72742888|chr3:72743914-72744275	T-complex protein 1 subunit eta [Source:RefSeq peptide;Acc:NP_001163993]	GO:0070062(extracellular exosome);GO:0044297(cell body);GO:0005874(microtubule);GO:0005832(chaperonin-containing T-complex);GO:0005739(mitochondrion);GO:0005737(cytoplasm);GO:0002199(zona pellucida receptor complex);GO:1904874(positive regulation of telomerase RNA localization to Cajal body);GO:1904871(positive regulation of protein localization to Cajal body);GO:1904851(positive regulation of es…	NA
circRNA13	115	145	115	46	81	107	48	98	77	21	61	30	6.7181	8.16247	6.4046	2.67198	5.025	6.85852	3.06985	4.35021	4.5999	0.80451	2.25692	1.22285	chr7	69874055	69878724	+	2	circRNA	-	ENSSSCT00000002190	BAZ1A	mRNA	chr7:69870824-69874054|chr7:69878724-69881328	bromodomain adjacent to zinc finger domain 1A [Source:HGNC Symbol;Acc:HGNC:960]	GO:0008623(CHRAC);GO:0005634(nucleus);GO:0006261(DNA-dependent DNA replication);GO:0046872(metal ion binding);GO:0008270(zinc ion binding);GO:0005515(protein binding)	NA
circRNA130	14	49	55.5	23.5	24.5	43	71.5	14	33.5	47.5	27	21	2.15508	7.26836	8.14468	3.59691	4.00501	7.26276	12.0495	1.63757	5.27338	4.79504	2.63231	2.25558	chr3	11449859	11452323	+	2	circRNA	-	ENSSSCT00000008466	GTF2I	mRNA	chr3:11444172-11449858|chr3:11452323-11454227	general transcription factor IIi [Source:HGNC Symbol;Acc:HGNC:4659]	GO:0043025(neuronal cell body);GO:0042995(cell projection);GO:0016020(membrane);GO:0005737(cytoplasm);GO:0005654(nucleoplasm);GO:0005634(nucleus);GO:0016525(negative regulation of angiogenesis);GO:0014886(transition between slow and fast fiber);GO:0007275(multicellular organism development);GO:0006357(regulation of transcription from RNA polymerase II promoter);GO:0006355(regulation of transcript…	03022(Basal transcription factors);04022(cGMP - PKG signaling pathway);05168(Herpes simplex infection)
circRNA1300	39.5	31.5	23.5	31.5	12	35	11.8	22	17.5	0	5	7	2.40409	1.84743	1.36353	1.90629	0.775597	2.33732	0.786253	1.01744	1.08918	0	0.192735	0.297272	chr3	75742883	75756405	+	6	circRNA	-	ENSSSCT00000009124	C2orf42	mRNA	chr3:75740208-75742882|chr3:75756405-75762208	chromosome 2 open reading frame 42 [Source:HGNC Symbol;Acc:HGNC:26056]	GO:0031965(nuclear membrane);GO:0005634(nucleus)	NA
circRNA1301	2.66667	1.33333	2.33333	5.66667	0	2.66667	0.666667	5.66667	2.66667	0	0	4	0.62835	0.302745	0.524149	1.32766	0	0.689444	0.171977	1.0146	0.642555	0	0	0.657652	chr3	76043022	76044136	-	2	circRNA	-	ENSSSCT00000009127	ENSSSCG00000008335	mRNA	chr3:76039878-76043021|chr3:76044136-76046680	NA	GO:0005634(nucleus);GO:0000151(ubiquitin ligase complex)	NA
circRNA1302	34	58.5	38.5	32	38	42	9.5	82	25	77.5	39.5	28.5	5.69068	9.43509	6.14316	5.32552	6.75415	7.71316	1.74075	10.4288	4.27892	8.50649	4.18716	3.32839	chr3	76322643	76324375	+	2	circRNA	-	ENSSSCT00000009130	AAK1	mRNA	chr3:76306608-76322642|chr3:76324375-76334886	AP2 associated kinase 1 [Source:HGNC Symbol;Acc:HGNC:19679]	GO:2000369(regulation of clathrin-dependent endocytosis);GO:0050821(protein stabilization);GO:0045747(positive regulation of Notch signaling pathway);GO:0032880(regulation of protein localization);GO:0006468(protein phosphorylation);GO:0035612(AP-2 adaptor complex binding);GO:0005524(ATP binding);GO:0005112(Notch binding);GO:0004672(protein kinase activity)	NA
circRNA1303	1	9	13	4	15	17	5	23	10	10	71	30	0.149567	1.29713	1.85364	0.594872	2.38248	2.78987	0.818718	2.61397	1.52949	0.980844	6.72562	3.13084	chr3	83691822	83692103	-	1	circRNA	-	ENSSSCT00000009171	COMMD1	mRNA	chr3:83691465-83691821|chr3:83692103-83749324	copper metabolism domain containing 1 [Source:HGNC Symbol;Acc:HGNC:23024]	GO:0070062(extracellular exosome);GO:0055037(recycling endosome);GO:0031462(Cul2-RING ubiquitin ligase complex);GO:0005829(cytosol);GO:0005769(early endosome);GO:0005768(endosome);GO:0005737(cytoplasm);GO:0005654(nucleoplasm);GO:0005634(nucleus);GO:2000009(negative regulation of protein localization to cell surface);GO:1902306(negative regulation of sodium ion transmembrane transport);GO:0055070(…	NA
circRNA1304	231	232	297	234	233	184	267	511	430	316	282	497	10.1491	9.82217	12.4399	10.2225	10.8711	8.87013	12.8426	17.0597	19.3193	9.10469	7.84695	15.2361	chr3	84313184	84382433	+	3	circRNA	-	ENSSSCT00000009178	ENSSSCG00000008382	mRNA	chr3:84312716-84313183|chr3:84382433-84387753	NA	GO:0016579(protein deubiquitination);GO:0006511(ubiquitin-dependent protein catabolic process);GO:0036459(thiol-dependent ubiquitinyl hydrolase activity)	NA
circRNA1305	22.6667	30	15.3333	21.5833	13.3333	25.3333	32.3333	31.6667	39	32	25.3333	21.3333	3.66297	4.67166	2.36226	3.46809	2.28816	4.49195	5.72036	3.88851	6.44494	3.39124	2.59283	2.40551	chr3	88084866	88119620	-	3	circRNA	-	ENSSSCT00000009192	VRK2	mRNA	chr3:88082677-88084865|chr3:88119620-88121131	vaccinia related kinase 2 [Source:HGNC Symbol;Acc:HGNC:12719]	GO:0043234(protein complex);GO:0031966(mitochondrial membrane);GO:0016021(integral component of membrane);GO:0016020(membrane);GO:0005789(endoplasmic reticulum membrane);GO:0005783(endoplasmic reticulum);GO:0005737(cytoplasm);GO:0005634(nucleus);GO:2000659(regulation of interleukin-1-mediated signaling pathway);GO:0046777(protein autophosphorylation);GO:0043408(regulation of MAPK cascade);GO:0034…	NA
circRNA1306	1.5	0	11.25	2.25	6.95	5.5	1.75	5	3.1	26.15	8.75	6	0.270372	0	1.93316	0.403254	1.33032	1.08775	0.345331	0.684819	0.571401	3.09104	0.998884	0.754614	chr3	90576383	90578016	-	2	circRNA	-	ENSSSCT00000009195	PPP4R3B	mRNA	chr3:90568225-90576382|chr3:90578016-90579458	SMEK homolog 2, suppressor of mek1 [Source:RefSeq peptide;Acc:NP_001231604]	GO:0030289(protein phosphatase 4 complex);GO:0016607(nuclear speck);GO:0005813(centrosome);GO:0005737(cytoplasm);GO:0005654(nucleoplasm);GO:0005634(nucleus);GO:0045722(positive regulation of gluconeogenesis);GO:0006470(protein dephosphorylation)	04922(Glucagon signaling pathway)
circRNA1307	75	48	58	9	59	66	21	11	17	0	0	25	16.1395	9.9535	11.8988	1.92575	13.4829	15.5837	4.9474	1.7987	3.741	0	0	3.75382	chr3	92462859	92463890	+	2	circRNA	-	ENSSSCT00000009212	PSME4	mRNA	chr3:92461755-92462858|chr3:92463890-92464657	proteasome activator subunit 4 [Source:HGNC Symbol;Acc:HGNC:20635]	GO:1990111(spermatoproteasome complex);GO:0005839(proteasome core complex);GO:0005829(cytosol);GO:0005654(nucleoplasm);GO:0005634(nucleus);GO:0035093(spermatogenesis, exchange of chromosomal proteins);GO:0010952(positive regulation of peptidase activity);GO:0010499(proteasomal ubiquitin-independent protein catabolic process);GO:0006974(cellular response to DNA damage stimulus);GO:0006281(DNA repa…	NA
circRNA1308	66.5	53	35	42	48.25	41.5	11.5	40.5	23.5	5.5	31.5	19	9.84153	7.55826	4.93804	6.1804	7.58299	6.73887	1.86323	4.55441	3.55646	0.533786	2.95249	1.962	chr3	92480216	92481403	+	2	circRNA	-	ENSSSCT00000009212	PSME4	mRNA	chr3:92471963-92480215|chr3:92481403-92483693	proteasome activator subunit 4 [Source:HGNC Symbol;Acc:HGNC:20635]	GO:1990111(spermatoproteasome complex);GO:0005839(proteasome core complex);GO:0005829(cytosol);GO:0005654(nucleoplasm);GO:0005634(nucleus);GO:0035093(spermatogenesis, exchange of chromosomal proteins);GO:0010952(positive regulation of peptidase activity);GO:0010499(proteasomal ubiquitin-independent protein catabolic process);GO:0006974(cellular response to DNA damage stimulus);GO:0006281(DNA repa…	NA
circRNA1309	7	9	12	17	15	7	48	42	28	0	18	48	0.802299	0.993998	1.31119	1.93737	1.82571	0.880306	6.02292	3.65783	3.28175	0	1.30662	3.83869	chr3	92579061	92584389	+	2	circRNA	-	ENSSSCT00000009215	ENSSSCG00000008415	mRNA	chr3:92549342-92579060|chr3:92584389-92604235	NA	GO:0005737(cytoplasm);GO:0005634(nucleus);GO:0000151(ubiquitin ligase complex);GO:0035556(intracellular signal transduction);GO:0016567(protein ubiquitination);GO:0031625(ubiquitin protein ligase binding);GO:0004842(ubiquitin-protein transferase activity)	NA
circRNA131	68	72	48	39	66	60	28	69	36	71	110	43	10.3169	10.5264	6.94269	5.88345	10.6338	9.98826	4.65079	7.95474	5.58538	7.0642	10.5699	4.55211	chr3	17185508	17186729	+	2	circRNA	-	ENSSSCT00000008493	ENSSSCG00000007746	mRNA	chr3:17184320-17185507|chr3:17186729-17187871	NA	GO:0005832(chaperonin-containing T-complex);GO:0005737(cytoplasm);GO:0061077(chaperone-mediated protein folding);GO:0006458('de novo' protein folding);GO:0006457(protein folding);GO:0051082(unfolded protein binding);GO:0044183(protein binding involved in protein folding);GO:0005524(ATP binding);GO:0000166(nucleotide binding)	NA
circRNA1310	8.33333	3.33333	2.33333	12.3333	15.45	6.5	19	39	23.6667	29.5	38.1667	22.8333	0.885349	0.341255	0.236329	1.30287	1.74311	0.757716	2.20992	3.14844	2.57123	2.05533	2.56813	1.69265	chr3	102273355	102275943	+	3	circRNA	-	ENSSSCT00000009250	PREPL	mRNA	chr3:102250705-102273354|chr3:102275943-102280470	prolyl endopeptidase-like [Source:HGNC Symbol;Acc:HGNC:30228]	GO:0005856(cytoskeleton);GO:0005794(Golgi apparatus);GO:0006508(proteolysis);GO:0070008(serine-type exopeptidase activity);GO:0008236(serine-type peptidase activity);GO:0004252(serine-type endopeptidase activity)	NA
circRNA1311	31.5	34	50.3333	23	30.5	27	29	31.5	24	0	23.5	16	2.87577	2.99108	4.38072	2.08785	2.95696	2.70461	2.89847	2.18519	2.2406	0	1.35878	1.01922	chr3	102960417	102980907	+	4	circRNA	-	ENSSSCT00000032410	ENSSSCG00000028599	mRNA	chr3:102940104-102960416|chr3:102980907-103022404	NA	NA	NA
circRNA1312	5	4.33333	12.3333	13.6667	7.91667	6.33333	6	30	20.6667	53.6667	19.3333	12.6667	0.761336	0.635818	1.79033	2.06917	1.28012	1.05812	1.0002	3.47107	3.218	5.35888	1.86445	1.34577	chr3	104197942	104199715	-	3	circRNA	-	ENSSSCT00000009269	EML4	mRNA	chr3:104195188-104197941|chr3:104199715-104206748	echinoderm microtubule associated protein like 4 [Source:HGNC Symbol;Acc:HGNC:1316]	GO:0016020(membrane);GO:0015630(microtubule cytoskeleton);GO:0008017(microtubule binding)	05223(Non-small cell lung cancer)
circRNA1313	32	34	12	5	19.5	17	17	10	6.5	32.5	0	0	6.02543	6.1691	2.15409	0.936126	3.89919	3.51224	3.50441	1.43078	1.25158	4.01314	0	0	chr3	106700866	106710635	-	2	circRNA	-	ENSSSCT00000009272	THUMPD2	mRNA	chr3:106694734-106700865|chr3:106710635-106711377	THUMP domain containing 2 [Source:HGNC Symbol;Acc:HGNC:14890]	GO:0003723(RNA binding)	NA
circRNA1314	57	82	20	58	33.5	18	66	32	15.5	49.5	16	0	8.74235	12.1191	2.92435	8.8452	5.45632	3.02917	11.0822	3.7294	2.43105	4.97877	1.55421	0	chr3	106710521	106715085	-	3	circRNA	-	ENSSSCT00000009272	THUMPD2	mRNA	chr3:106700974-106710520|chr3:106715085-106720272	THUMP domain containing 2 [Source:HGNC Symbol;Acc:HGNC:14890]	GO:0003723(RNA binding)	NA
circRNA1315	149.5	108	88	56.5	75.5	115	122	62	60.8333	77	69	23	10.4398	7.26738	5.85837	3.92305	5.59884	8.81139	9.32688	3.28985	4.3441	3.52617	3.05165	1.12068	chr3	114030015	114039242	-	4	circRNA	-	ENSSSCT00000009316	BIRC6	mRNA	chr3:114027542-114030014|chr3:114039242-114039949	baculoviral IAP repeat containing 6 [Source:HGNC Symbol;Acc:HGNC:13516]	GO:0043231(intracellular membrane-bounded organelle);GO:0030496(midbody);GO:0016020(membrane);GO:0005815(microtubule organizing center);GO:0005802(trans-Golgi network);GO:0005794(Golgi apparatus);GO:0005768(endosome);GO:0005737(cytoplasm);GO:0000922(spindle pole);GO:2001237(negative regulation of extrinsic apoptotic signaling pathway);GO:0060712(spongiotrophoblast layer development);GO:0060711(la…	04120(Ubiquitin mediated proteolysis)
circRNA1316	4	0	0	6	1	4	31	66	20	0	0	0	0.375751	0	0	0.560425	0.0997566	0.412285	3.18808	4.71106	1.92123	0	0	0	chr3	115146395	115154398	+	4	circRNA	-	ENSSSCT00000009328	GALNT14	mRNA	chr3:115134986-115146394|chr3:115154398-115162907	polypeptide N-acetylgalactosaminyltransferase 14 [Source:HGNC Symbol;Acc:HGNC:22946]	GO:0016021(integral component of membrane);GO:0016020(membrane);GO:0005794(Golgi apparatus);GO:0000139(Golgi membrane);GO:0006486(protein glycosylation);GO:0030246(carbohydrate binding);GO:0016757(transferase activity, transferring glycosyl groups);GO:0016740(transferase activity)	00512(Mucin type O-glycan biosynthesis)
circRNA1317	132.5	125	181	64	65	108.5	42	94	68	28	3	15	16.152	14.6833	21.0346	7.7574	8.41444	14.5123	5.60514	8.70709	8.47672	2.23837	0.231616	1.27586	chr3	120066344	120085560	+	3	circRNA	-	ENSSSCT00000009382	ENSSSCG00000008575	mRNA	chr3:119992109-120066343|chr3:120085560-120136071	NA	GO:0006355(regulation of transcription, DNA-templated);GO:0006351(transcription, DNA-templated);GO:0003677(DNA binding)	NA
circRNA1318	14.5429	14.2214	16.8071	162.862	138.177	138.731	252.31	424.98	275.683	4.4254	20.2857	11.8	1.21223	1.14231	1.33559	13.4984	12.2313	12.6884	23.0249	26.9178	23.4993	0.241908	1.07093	0.686311	chr3	130366351	130392936	-	4	circRNA	-	ENSSSCT00000022524	ENSSSCG00000027247	mRNA	chr3:130362108-130366350|chr3:130392936-130406102	NA	NA	NA
circRNA1319	24.6976	22.0071	28.3071	241.196	260.725	227.602	409.386	677.444	510.433	5.06825	24.2857	21.2167	1.34066	1.15115	1.46489	13.0185	15.0297	13.5562	24.3291	27.943	28.3343	0.180421	0.834935	0.80361	chr3	130366351	130420826	-	9	circRNA	-	ENSSSCT00000022524	ENSSSCG00000027247	mRNA	chr3:130362108-130366350|chr3:130420826-130423317	NA	NA	NA
circRNA132	2.5	13	7	11	14	0	9.5	17.5	7	46.5	138.5	86.5	0.466571	2.3379	1.24543	2.04125	2.77465	0	1.94101	2.48171	1.33593	5.69107	16.3706	11.2641	chr3	17254499	17255299	-	2	circRNA	-	ENSSSCT00000027523	ZNF713	mRNA	chr3:17252255-17254498|chr3:17255299-17260632	zinc finger protein 713 [Source:HGNC Symbol;Acc:HGNC:22043]	GO:0005622(intracellular);GO:0006355(regulation of transcription, DNA-templated);GO:0046872(metal ion binding);GO:0003676(nucleic acid binding)	NA
circRNA1320	2.84286	1.57143	4.85714	120.017	111.903	117.501	193.078	337.849	213.868	4.4254	14.2857	11.8	0.326719	0.174028	0.532165	13.7148	13.6573	14.8169	24.293	29.5038	25.1348	0.33353	1.03982	0.946249	chr3	130387896	130392936	-	3	circRNA	-	ENSSSCT00000022524	ENSSSCG00000027247	mRNA	chr3:130366489-130387895|chr3:130392936-130406102	NA	NA	NA
circRNA1321	1.7	1	0	45.7631	44.8177	42.9374	69.0783	117.103	87.9737	2.71111	0	1.8	0.535094	0.303309	0	14.3226	14.9807	14.8291	23.804	28.0081	28.3167	0.559618	0	0.395327	chr3	130392803	130392936	-	1	circRNA	-	ENSSSCT00000022524	ENSSSCG00000027247	mRNA	chr3:130389879-130392802|chr3:130392936-130406102	NA	NA	NA
circRNA1322	32.1667	35.5	13.5	21.2619	34.5167	18.4667	43.9524	84.7619	69.7929	15.6667	15.3333	13.3333	3.50575	3.72828	1.40267	2.30411	3.9949	2.20832	5.24427	7.01958	7.77848	1.11973	1.0584	1.01395	chr3	130577979	130588353	+	3	circRNA	-	ENSSSCT00000028310	ENSSSCG00000029729	mRNA	chr3:130566330-130577978|chr3:130588353-130589916	NA	NA	NA
circRNA1323	5.86667	5.38162	6.33333	12.6889	23.1444	26.4159	28.2611	65.5171	41.1131	0	17.1333	0.333333	0.381858	0.337543	0.392997	0.821223	1.59978	1.88657	2.01385	3.24042	2.73653	0	0.706301	0.0151389	chr3	130634824	130651664	+	4	circRNA	-	ENSSSCT00000009431	ENSSSCG00000008620	mRNA	chr3:130629407-130634823|chr3:130651664-130659108	NA	GO:0006890(retrograde vesicle-mediated transport, Golgi to ER)	NA
circRNA1324	5.65476	3.14194	1.13095	18.2333	18.25	24.1179	28.3354	57.507	40.12	2.14286	8.30357	8.375	0.534768	0.286322	0.101963	1.71452	1.8328	2.50258	2.93365	4.13245	3.8799	0.132895	0.49734	0.552636	chr3	130665824	130674137	+	3	circRNA	-	ENSSSCT00000009431	ENSSSCG00000008620	mRNA	chr3:130661495-130665823|chr3:130674137-130678715	NA	GO:0006890(retrograde vesicle-mediated transport, Golgi to ER)	NA
circRNA1325	5.82143	1.80861	2.21429	17.15	16.6111	25.7429	39.1549	59.0594	44.0228	2.14286	8.30357	7.875	0.537278	0.160849	0.194827	1.57384	1.62806	2.6069	3.95624	4.14185	4.15486	0.129696	0.485369	0.507135	chr3	130671134	130678829	+	3	circRNA	-	ENSSSCT00000009431	ENSSSCG00000008620	mRNA	chr3:130665926-130671133|chr3:130678829-130685274	NA	GO:0006890(retrograde vesicle-mediated transport, Golgi to ER)	NA
circRNA1326	11.7143	20.8333	8.40476	24.7857	33.0595	31.9048	72.0893	84.7917	61.0595	64.881	22.1667	33.4345	0.888642	1.52291	0.60783	1.86956	2.66324	2.65561	5.987	4.88765	4.73667	3.22769	1.065	1.76974	chr3	130877269	130893130	-	4	circRNA	-	ENSSSCT00000009432	ENSSSCG00000008621	mRNA	chr3:130868878-130877268|chr3:130893130-130917080	NA	NA	NA
circRNA1327	17.15	10.15	24.5881	26.6024	37.3262	36.7381	78.9393	95.9519	71.1095	69.4476	44.1167	64.3679	1.21165	0.691007	1.65608	1.86878	2.80045	2.84791	6.10566	5.15111	5.13746	3.2176	1.97402	3.1731	chr3	130892424	130921437	-	5	circRNA	-	ENSSSCT00000009432	ENSSSCG00000008621	mRNA	chr3:130881440-130892423|chr3:130921437-130938371	NA	NA	NA
circRNA1328	70	73	71	46.5	36.5	64.5	128.5	130.5	66.5	68.5	53.5	68	5.43731	5.46404	5.25763	3.59141	3.01079	5.49722	10.9274	7.70251	5.28222	3.48931	2.63195	3.68552	chr3	134019980	134077158	+	4	circRNA	-	ENSSSCT00000028641	E2F6	mRNA	chr3:134012494-134019979|chr3:134077158-134080225	E2F transcription factor 6 [Source:HGNC Symbol;Acc:HGNC:3120]	GO:0071339(MLL1 complex);GO:0005730(nucleolus);GO:0005667(transcription factor complex);GO:0005634(nucleus);GO:0006355(regulation of transcription, DNA-templated);GO:0006351(transcription, DNA-templated);GO:0000083(regulation of transcription involved in G1/S transition of mitotic cell cycle);GO:0046983(protein dimerization activity);GO:0003700(transcription factor activity, sequence-specific DNA…	NA
circRNA1329	24	0	98	13	4	43	20	14	16	11	32	49	5.81766	0	22.6469	3.13333	1.02967	11.4368	5.30755	2.5787	3.96612	1.74861	4.91274	8.28774	chr3	135341139	135341697	-	2	circRNA	-	ENSSSCT00000009454	ASAP2	mRNA	chr3:135336298-135341138|chr3:135341697-135350240	ArfGAP with SH3 domain, ankyrin repeat and PH domain 2 [Source:HGNC Symbol;Acc:HGNC:2721]	GO:0043547(positive regulation of GTPase activity);GO:0005096(GTPase activator activity)	04144(Endocytosis);04666(Fc gamma R-mediated phagocytosis)
circRNA133	615	552.5	554	312	411.5	476.5	264.5	350	170.5	689	525	382.5	44.2653	38.32	38.014	22.329	31.4529	37.6313	20.8421	19.1422	12.5494	32.5215	23.9323	19.2098	chr3	24136275	24148233	+	3	circRNA	-	ENSSSCT00000030167	METTL9	mRNA	chr3:24135646-24136274|chr3:24148233-24170166	methyltransferase like 9 [Source:HGNC Symbol;Acc:HGNC:24586]	NA	NA
circRNA1330	25	51	10	2	11	6	27	3	15	0	24	14	3.55034	6.97918	1.35386	0.282414	1.65891	0.934928	4.19779	0.323732	2.17836	0	2.15863	1.38727	chr2	15639453	15641497	-	2	circRNA	-	ENSSSCT00000022326	PTPRJ	mRNA	chr2:15635914-15639452|chr2:15641497-15645709	protein tyrosine phosphatase, receptor type J [Source:HGNC Symbol;Acc:HGNC:9673]	GO:0070062(extracellular exosome);GO:0016021(integral component of membrane);GO:0016020(membrane);GO:0009986(cell surface);GO:0005911(cell-cell junction);GO:0005886(plasma membrane);GO:0001772(immunological synapse);GO:0051898(negative regulation of protein kinase B signaling);GO:0051897(positive regulation of protein kinase B signaling);GO:0051894(positive regulation of focal adhesion assembly);…	04520(Adherens junction)
circRNA1331	62.5	39	19.5	66	66.5	100.5	118.5	174	116.5	34.5	67	43	7.84561	4.71755	2.3336	8.23791	8.86483	13.8424	16.2852	16.5971	14.9548	2.84007	5.3267	3.76633	chr2	16501190	16502473	+	3	circRNA	-	ENSSSCT00000029405	ENSSSCG00000025402	mRNA	chr2:16500428-16501189|chr2:16502473-16504461	NA	GO:0043547(positive regulation of GTPase activity);GO:0017112(Rab guanyl-nucleotide exchange factor activity)	NA
circRNA1332	46	30	20	36	51	75	110	108	52	201	302	178	3.96767	2.49346	1.64457	3.08749	4.67142	7.098	10.3872	7.07842	4.58658	11.3694	16.4976	10.7127	chr2	16545939	16546678	-	3	circRNA	-	ENSSSCT00000014461	NR1H3	mRNA	chr2:16540786-16545938|chr2:16546678-16547421	nuclear receptor subfamily 1 group H member 3 [Source:HGNC Symbol;Acc:HGNC:7966]	GO:0090575(RNA polymerase II transcription factor complex);GO:0005634(nucleus);GO:2000188(regulation of cholesterol homeostasis);GO:0090341(negative regulation of secretion of lysosomal enzymes);GO:0090188(negative regulation of pancreatic juice secretion);GO:0071222(cellular response to lipopolysaccharide);GO:0070328(triglyceride homeostasis);GO:0055092(sterol homeostasis);GO:0055088(lipid homeo…	03320(PPAR signaling pathway);04932(Non-alcoholic fatty liver disease (NAFLD));05160(Hepatitis C)
circRNA1333	46	47	8	87	54	29	84	139	92	90	110	83	5.05257	4.97459	0.837703	9.50168	6.29869	3.49503	10.1009	11.6013	10.3336	6.48277	7.65217	6.36116	chr2	16913757	16914796	-	3	circRNA	-	ENSSSCT00000030061	ENSSSCG00000028351	mRNA	chr2:16912262-16913756|chr2:16914796-16918296	NA	NA	NA
circRNA1334	61.5	83	60.5	54	68	64.5	91.5	92.5	105.333	117.5	84	53.5	5.50732	7.16223	5.16495	4.80823	6.4666	6.33756	8.97044	6.29423	9.64583	6.90027	4.76411	3.34289	chr2	17228897	17236390	-	5	circRNA	-	ENSSSCT00000014481	ATG13	mRNA	chr2:17224259-17228896|chr2:17236390-17265938	autophagy related 13 [Source:HGNC Symbol;Acc:HGNC:29091]	GO:1990316(ATG1/ULK1 kinase complex);GO:0005829(cytosol);GO:0005739(mitochondrion);GO:0000407(pre-autophagosomal structure);GO:1903955(positive regulation of protein targeting to mitochondrion);GO:0098779(positive regulation of macromitophagy in response to mitochondrial depolarization);GO:0006914(autophagy);GO:0000045(autophagosome assembly);GO:0019901(protein kinase binding)	04140(Regulation of autophagy)
circRNA1335	35	17	26.5	15	17	17.5	32	32	39	128.5	55.5	40.5	4.1351	1.9354	2.98476	1.76212	2.13289	2.26858	4.139	2.87279	4.71185	9.95598	4.15286	3.33869	chr2	17315584	17316714	+	2	circRNA	-	ENSSSCT00000014486	AMBRA1	mRNA	chr2:17314860-17315583|chr2:17316714-17318156	autophagy and beclin 1 regulator 1 [Source:HGNC Symbol;Acc:HGNC:25990]	GO:0045335(phagocytic vesicle);GO:0043231(intracellular membrane-bounded organelle);GO:0005930(axoneme);GO:0005829(cytosol);GO:0005739(mitochondrion);GO:0005737(cytoplasm);GO:2000785(regulation of autophagosome assembly);GO:1903599(positive regulation of mitophagy);GO:0098779(positive regulation of macromitophagy in response to mitochondrial depolarization);GO:0043552(positive regulation of phosp…	NA
circRNA1336	73.3333	113.583	100.283	66.5833	84.4167	84.8333	51.9167	80.5	56.6667	33.25	38.0833	9.41667	11.8508	17.6874	15.4497	10.6989	14.4869	15.0421	9.18501	9.885	9.36444	3.52371	3.89778	1.06181	chr2	17353231	17366493	+	2	circRNA	-	ENSSSCT00000014486	AMBRA1	mRNA	chr2:17349071-17353230|chr2:17366493-17367427	autophagy and beclin 1 regulator 1 [Source:HGNC Symbol;Acc:HGNC:25990]	GO:0045335(phagocytic vesicle);GO:0043231(intracellular membrane-bounded organelle);GO:0005930(axoneme);GO:0005829(cytosol);GO:0005739(mitochondrion);GO:0005737(cytoplasm);GO:2000785(regulation of autophagosome assembly);GO:1903599(positive regulation of mitophagy);GO:0098779(positive regulation of macromitophagy in response to mitochondrial depolarization);GO:0043552(positive regulation of phosp…	NA
circRNA1337	107	105	59	112	63	148	249	353	191	161	91	89	12.6416	11.954	6.64531	13.1572	7.90424	19.1857	32.2066	31.6904	23.076	12.474	6.8092	7.33687	chr2	19750076	19758365	-	2	circRNA	-	ENSSSCT00000014505	EXT2	mRNA	chr2:19720711-19750075|chr2:19758365-19785270	exostosin glycosyltransferase 2 [Source:HGNC Symbol;Acc:HGNC:3513]	GO:0070062(extracellular exosome);GO:0043541(UDP-N-acetylglucosamine transferase complex);GO:0016021(integral component of membrane);GO:0016020(membrane);GO:0005794(Golgi apparatus);GO:0005783(endoplasmic reticulum);GO:0033692(cellular polysaccharide biosynthetic process);GO:0030154(cell differentiation);GO:0015014(heparan sulfate proteoglycan biosynthetic process, polysaccharide chain biosynthet…	00534(Glycosaminoglycan biosynthesis - heparan sulfate / heparin)
circRNA1338	48	38.5	43.5	34.5	40	43	34.5	21.5	30	0	19	7	7.78671	6.01836	6.7274	5.56491	6.89088	7.65383	6.12716	2.65025	4.97671	0	1.95211	0.792344	chr2	20608547	20611393	-	2	circRNA	-	ENSSSCT00000014508	TTC17	mRNA	chr2:20606969-20608546|chr2:20611393-20613682	tetratricopeptide repeat domain 17 [Source:HGNC Symbol;Acc:HGNC:25596]	GO:0015629(actin cytoskeleton);GO:0005886(plasma membrane);GO:0005829(cytosol);GO:0005737(cytoplasm);GO:0044782(cilium organization);GO:0030041(actin filament polymerization)	NA
circRNA1339	778	773.5	625	934	901	1012.67	1047	1411	985	286	393	394	18.0896	17.3306	13.854	21.5934	22.2472	25.8353	26.6516	24.9294	23.4204	4.36092	5.78733	6.39217	chr2	29096012	29141373	+	13	circRNA	-	ENSSSCT00000014529	ABTB2	mRNA	chr2:28947887-29096011|chr2:29141373-29145781	ankyrin repeat and BTB domain containing 2 [Source:HGNC Symbol;Acc:HGNC:23842]	GO:0019005(SCF ubiquitin ligase complex);GO:0005737(cytoplasm);GO:0097237(cellular response to toxic substance);GO:0043161(proteasome-mediated ubiquitin-dependent protein catabolic process);GO:0042787(protein ubiquitination involved in ubiquitin-dependent protein catabolic process);GO:0030162(regulation of proteolysis);GO:0046982(protein heterodimerization activity);GO:0031625(ubiquitin protein l…	NA
circRNA134	23	48	27	37	14	30	6	8	23	0	76	30	2.44356	4.91407	2.73467	3.90862	1.57952	3.49715	0.697869	0.645834	2.4988	0	5.11383	2.22392	chr3	26988009	26996417	-	3	circRNA	-	ENSSSCT00000008620	TMC7	mRNA	chr3:26986464-26988008|chr3:26996417-26999911	transmembrane channel like 7 [Source:HGNC Symbol;Acc:HGNC:23000]	GO:0016021(integral component of membrane);GO:0016020(membrane)	NA
circRNA1340	25	46	15	42	56	12	34	25	17	13	13	16	4.46801	7.92203	2.5557	7.46362	10.6283	2.35317	6.65243	3.39508	3.10693	1.52363	1.47148	1.99525	chr2	30453525	30457400	-	2	circRNA	-	ENSSSCT00000014540	QSER1	mRNA	chr2:30450303-30453524|chr2:30457400-30460313	glutamine and serine rich 1 [Source:HGNC Symbol;Acc:HGNC:26154]	NA	NA
circRNA1341	69	89	60	71	52	104	130	90	84	105	60	162	10.1051	12.56	8.37703	10.339	8.08721	16.7118	20.8432	10.0155	12.58	10.0843	5.56521	16.5543	chr2	41866547	41885122	-	3	circRNA	-	ENSSSCT00000014576	ENSSSCG00000013347	mRNA	chr2:41837827-41866546|chr2:41885122-41888659	NA	GO:0032259(methylation);GO:0006479(protein methylation);GO:0016740(transferase activity);GO:0008168(methyltransferase activity)	NA
circRNA1342	0	10	2	7	1.5	0	5.16667	7.16667	5.41667	16.6667	14	0	0	2.30929	0.456929	1.66801	0.381739	0	1.35554	1.30505	1.32744	2.6193	2.1249	0	chr2	43972990	43973332	+	2	circRNA	-	ENSSSCT00000014600	HPS5	mRNA	chr2:43970520-43972989|chr2:43973332-43974052	HPS5, biogenesis of lysosomal organelles complex 2 subunit 2 [Source:HGNC Symbol;Acc:HGNC:17022]	GO:0031084(BLOC-2 complex);GO:0043473(pigmentation);GO:0007596(blood coagulation);GO:0006996(organelle organization)	NA
circRNA1343	21	10	21	17	30	27	50	51	79	0	46	35	3.17469	1.45676	3.02654	2.55539	4.8162	4.47861	8.27521	5.85851	12.2129	0	4.4043	3.69193	chr2	45021103	45024046	+	2	circRNA	-	ENSSSCT00000024535	PIK3C2A	mRNA	chr2:45007721-45021102|chr2:45024046-45025437	phosphatidylinositol-4-phosphate 3-kinase catalytic subunit type 2 alpha [Source:HGNC Symbol;Acc:HGNC:8971]	GO:0070062(extracellular exosome);GO:0031982(vesicle);GO:0016020(membrane);GO:0005942(phosphatidylinositol 3-kinase complex);GO:0005886(plasma membrane);GO:0005737(cytoplasm);GO:0005634(nucleus);GO:0005622(intracellular);GO:0048015(phosphatidylinositol-mediated signaling);GO:0046854(phosphatidylinositol phosphorylation);GO:0036092(phosphatidylinositol-3-phosphate biosynthetic process);GO:0016310(…	00562(Inositol phosphate metabolism);04070(Phosphatidylinositol signaling system)
circRNA1344	0	0	0	36	17	25	66	47	75	1	0	0	0	0	0	2.31918	1.16965	1.77723	4.68141	2.31387	4.96907	0.0424882	0	0	chr2	47078665	47103982	-	5	circRNA	-	ENSSSCT00000014620	INSC	mRNA	chr2:47051319-47078664|chr2:47103982-47124687	inscuteable homolog (Drosophila) [Source:HGNC Symbol;Acc:HGNC:33116]	NA	NA
circRNA1345	18	27.8	16	13.3333	18	24.6667	28	71	48.6667	75	25.5	22.3333	1.0177	1.5146	0.862408	0.74957	1.08074	1.53022	1.73314	3.05029	2.81376	2.78081	0.913113	0.881057	chr2	47993416	47999371	+	5	circRNA	-	ENSSSCT00000014629	ENSSSCG00000013392	mRNA	chr2:47987970-47993415|chr2:47999371-48001851	coatomer subunit beta [Source:RefSeq peptide;Acc:NP_001165837]	GO:0030117(membrane coat);GO:0016020(membrane);GO:0005737(cytoplasm);GO:0016192(vesicle-mediated transport);GO:0015031(protein transport);GO:0006886(intracellular protein transport);GO:0006810(transport)	NA
circRNA1346	18	14.8	15	10.3333	12	21.6667	25	55	38.6667	64	25	11.3333	1.47133	1.16574	1.16889	0.839853	1.04164	1.94324	2.23719	3.41613	3.23208	3.43067	1.29424	0.646394	chr2	47994183	47999371	+	4	circRNA	-	ENSSSCT00000014629	ENSSSCG00000013392	mRNA	chr2:47993645-47994182|chr2:47999371-48001851	coatomer subunit beta [Source:RefSeq peptide;Acc:NP_001165837]	GO:0030117(membrane coat);GO:0016020(membrane);GO:0005737(cytoplasm);GO:0016192(vesicle-mediated transport);GO:0015031(protein transport);GO:0006886(intracellular protein transport);GO:0006810(transport)	NA
circRNA1347	44	43	71	58	46	20.5	53	26	47	0	15	0	4.62801	4.35828	7.11943	6.06591	5.13809	2.36588	6.10302	2.07802	5.05532	0	0.99924	0	chr2	49335255	49340140	-	3	circRNA	-	ENSSSCT00000014635	ENSSSCG00000013397	mRNA	chr2:49332360-49335254|None	NA	GO:0005737(cytoplasm);GO:0005667(transcription factor complex);GO:0005634(nucleus);GO:0006355(regulation of transcription, DNA-templated);GO:0006351(transcription, DNA-templated);GO:0046983(protein dimerization activity);GO:0003700(transcription factor activity, sequence-specific DNA binding)	04728(Dopaminergic synapse);04710(Circadian rhythm);05168(Herpes simplex infection)
circRNA1348	33	17	13	29	23	42	66	54	27	153	0	79	9.21771	4.57575	3.46177	8.05441	6.82242	12.8723	20.1828	11.4614	7.71226	28.0262	0	15.3971	chr2	50299420	50301580	-	3	circRNA	-	ENSSSCT00000028332	PARVA	mRNA	chr2:50294363-50299419|chr2:50301580-50304595	parvin alpha [Source:HGNC Symbol;Acc:HGNC:14652]	GO:0030027(lamellipodium);GO:0015629(actin cytoskeleton);GO:0005925(focal adhesion);GO:0005829(cytosol);GO:0005737(cytoplasm);GO:0005634(nucleus);GO:0071670(smooth muscle cell chemotaxis);GO:0070252(actin-mediated cell contraction);GO:0034446(substrate adhesion-dependent cell spreading);GO:0034113(heterotypic cell-cell adhesion);GO:0031532(actin cytoskeleton reorganization);GO:0007163(establishme…	04510(Focal adhesion)
circRNA1349	28	5	16	9.66667	10.1667	11.25	31.6667	50.8333	24.5	59	54.5	50.8333	3.47348	0.597698	1.89222	1.19237	1.33933	1.53129	4.30068	4.79172	3.10801	4.79979	4.28194	4.40006	chr2	52823538	52827726	+	3	circRNA	-	ENSSSCT00000024151	ENSSSCG00000028260	mRNA	chr2:52803632-52823537|chr2:52827726-52846486	NA	GO:0043087(regulation of GTPase activity);GO:0019208(phosphatase regulator activity)	NA
circRNA135	55	107	159	67	61	99	80	149	83	132	25	16	11.9577	22.4168	32.9554	14.4839	14.0837	23.6166	19.0415	24.6154	18.4532	18.8201	3.4424	2.42721	chr3	29149383	29151969	-	2	circRNA	-	ENSSSCT00000008629	ABCC1	mRNA	chr3:29140777-29149382|chr3:29151969-29167612	ATP binding cassette subfamily C member 1 [Source:HGNC Symbol;Acc:HGNC:51]	GO:0070062(extracellular exosome);GO:0016323(basolateral plasma membrane);GO:0016021(integral component of membrane);GO:0016020(membrane);GO:0005887(integral component of plasma membrane);GO:0005886(plasma membrane);GO:0055085(transmembrane transport);GO:0042908(xenobiotic transport);GO:0034775(glutathione transmembrane transport);GO:0006855(drug transmembrane transport);GO:0006810(transport);GO:…	NA
circRNA1350	23	55.5	21	17.6667	14.6667	43.75	68.6667	41.3333	65.5	54	25	23.3333	2.72498	6.33627	2.37192	2.08122	1.84531	5.68737	8.90655	3.72111	7.93572	4.19559	1.87591	1.92893	chr2	52846487	52849629	+	3	circRNA	-	ENSSSCT00000024151	ENSSSCG00000028260	mRNA	chr2:52827726-52846486|chr2:52849629-52852908	NA	GO:0043087(regulation of GTPase activity);GO:0019208(phosphatase regulator activity)	NA
circRNA1351	0	36	17	14	34	23	25	52	30	0	54	14	0	2.68471	1.25425	1.07732	2.79428	1.95306	2.11815	3.05794	2.37421	0	2.64679	0.755998	chr2	54394540	54395084	-	1	circRNA	-	ENSSSCT00000015274	SNAP47	mRNA	chr2:54348827-54394539|chr2:54395084-54412394	synaptosome associated protein 47 [Source:HGNC Symbol;Acc:HGNC:30669]	GO:0043025(neuronal cell body);GO:0031201(SNARE complex);GO:0031083(BLOC-1 complex);GO:0030672(synaptic vesicle membrane);GO:0030425(dendrite);GO:0016020(membrane);GO:0005886(plasma membrane);GO:0098967(exocytic insertion of neurotransmitter receptor to postsynaptic membrane);GO:0060291(long-term synaptic potentiation);GO:0031629(synaptic vesicle fusion to presynaptic active zone membrane);GO:001…	NA
circRNA1352	7	8	11	5	3	18	0	14	3	0	0	0	0.681862	0.750919	1.02149	0.484278	0.310328	1.92384	0	1.03624	0.298833	0	0	0	chr2	71145161	71148100	+	4	circRNA	-	ENSSSCT00000014859	MYO1F	mRNA	chr2:71141180-71145160|chr2:71148100-71154220	myosin IF [Source:HGNC Symbol;Acc:HGNC:7600]	GO:0016459(myosin complex);GO:0005524(ATP binding);GO:0003779(actin binding);GO:0003774(motor activity);GO:0000166(nucleotide binding)	NA
circRNA1353	54.5	27	34.5	19.5	35.5	33.5	37	57	52.5	81	70	38	8.7072	4.15672	5.25468	3.09773	6.02299	5.87252	6.47159	6.91978	8.57729	8.48653	7.083	4.23613	chr2	73355031	73361773	+	2	circRNA	-	ENSSSCT00000014781	MLLT1	mRNA	chr2:73345750-73355030|chr2:73361773-73393740	MLLT1, super elongation complex subunit [Source:HGNC Symbol;Acc:HGNC:7134]	GO:0008023(transcription elongation factor complex);GO:0005829(cytosol);GO:0005654(nucleoplasm);GO:0005634(nucleus);GO:0001650(fibrillar center);GO:0006469(negative regulation of protein kinase activity);GO:0006355(regulation of transcription, DNA-templated)	05202(Transcriptional misregulation in cancers)
circRNA1354	266	295	440.417	239.083	254.167	284.5	186.533	287.333	330.333	242.333	129.5	155.833	27.4984	29.3868	43.4045	24.5755	27.9027	32.2705	21.111	22.5708	34.921	16.4287	8.47877	11.2406	chr2	73355031	73393884	+	3	circRNA	-	ENSSSCT00000014781	MLLT1	mRNA	chr2:73345750-73355030|chr2:73393884-73397032	MLLT1, super elongation complex subunit [Source:HGNC Symbol;Acc:HGNC:7134]	GO:0008023(transcription elongation factor complex);GO:0005829(cytosol);GO:0005654(nucleoplasm);GO:0005634(nucleus);GO:0001650(fibrillar center);GO:0006469(negative regulation of protein kinase activity);GO:0006355(regulation of transcription, DNA-templated)	05202(Transcriptional misregulation in cancers)
circRNA1355	25	7	13	14	19	47	32	2	12	0	45	12	3.77939	1.01973	1.87357	2.10444	3.05026	7.7961	5.29614	0.229746	1.85512	0	4.30855	1.2658	chr2	81755819	81757669	+	2	circRNA	-	ENSSSCT00000015326	PHYKPL	mRNA	chr2:81754608-81755818|chr2:81757669-81761137	5-phosphohydroxy-L-lysine phospho-lyase [Source:HGNC Symbol;Acc:HGNC:28249]	GO:0005739(mitochondrion);GO:0042802(identical protein binding);GO:0030170(pyridoxal phosphate binding);GO:0008483(transaminase activity);GO:0008453(alanine-glyoxylate transaminase activity);GO:0003824(catalytic activity)	00310(Lysine degradation)
circRNA1356	102	161	161	76	103	40	178	242	152	59	23	25	8.13262	12.3698	12.2378	6.02518	8.72106	3.49935	15.5374	14.6616	12.3932	3.08493	1.16144	1.39083	chr2	83020290	83026861	-	5	circRNA	-	ENSSSCT00000015356	FAF2	mRNA	chr2:83017648-83020289|chr2:83026861-83033570	Fas associated factor family member 2 [Source:HGNC Symbol;Acc:HGNC:24666]	GO:0034098(VCP-NPL4-UFD1 AAA ATPase complex);GO:0016021(integral component of membrane);GO:0016020(membrane);GO:0005811(lipid particle);GO:0005783(endoplasmic reticulum);GO:0043086(negative regulation of catalytic activity);GO:0034389(lipid particle organization);GO:0030970(retrograde protein transport, ER to cytosol);GO:0030433(ER-associated ubiquitin-dependent protein catabolic process);GO:0055…	NA
circRNA1357	6.5	16	4	3	0	0	21.5	24.5	19	0	0	14.5	1.21848	2.8902	0.71484	0.559179	0	0	4.41234	3.48984	3.64222	0	0	1.8966	chr2	84231850	84234187	+	2	circRNA	-	ENSSSCT00000015370	ANKRA2	mRNA	chr2:84230945-84231849|chr2:84234187-84236803	ankyrin repeat family A member 2 [Source:HGNC Symbol;Acc:HGNC:13208]	GO:1990393(3M complex);GO:0016020(membrane);GO:0005829(cytosol);GO:0005737(cytoplasm);GO:0005634(nucleus);GO:0043254(regulation of protein complex assembly);GO:0006357(regulation of transcription from RNA polymerase II promoter);GO:0050750(low-density lipoprotein particle receptor binding);GO:0042826(histone deacetylase binding);GO:0031625(ubiquitin protein ligase binding);GO:0003712(transcriptio…	NA
circRNA1358	12	11	18	23	9	47	12	48	40	0	53.5	23	2.45697	2.17028	3.51347	4.68245	1.95688	10.5588	2.68985	7.46785	8.37505	0	6.93761	3.28587	chr2	85336539	85340454	+	2	circRNA	-	ENSSSCT00000015373	HEXB	mRNA	chr2:85332101-85336538|chr2:85340454-85356890	beta-hexosaminidase subunit beta precursor [Source:RefSeq peptide;Acc:NP_999086]	GO:0070062(extracellular exosome);GO:0042582(azurophil granule);GO:0016020(membrane);GO:0005764(lysosome);GO:0005615(extracellular space);GO:0001669(acrosomal vesicle);GO:0050905(neuromuscular process);GO:0050885(neuromuscular process controlling balance);GO:0048477(oogenesis);GO:0045944(positive regulation of transcription from RNA polymerase II promoter);GO:0044267(cellular protein metabolic pr…	00520(Amino sugar and nucleotide sugar metabolism);00531(Glycosaminoglycan degradation);00603(Glycosphingolipid biosynthesis - globo series);00604(Glycosphingolipid biosynthesis - ganglio series);00511(Other glycan degradation);04142(Lysosome)
circRNA1359	66.5	54.5	59	46	31	41.5	103.5	200.5	114	47	50	50.5	14.0242	11.0753	11.8619	9.64584	6.94256	9.60288	23.8959	32.1296	24.585	6.50006	6.67826	7.43106	chr2	85973785	85974271	+	2	circRNA	-	ENSSSCT00000015381	HMGCR	mRNA	chr2:85972444-85973784|chr2:85974271-85975697	3-hydroxy-3-methylglutaryl-CoA reductase [Source:HGNC Symbol;Acc:HGNC:5006]	GO:0016021(integral component of membrane);GO:0016020(membrane);GO:0005789(endoplasmic reticulum membrane);GO:0005783(endoplasmic reticulum);GO:0005778(peroxisomal membrane);GO:0055114(oxidation-reduction process);GO:0051262(protein tetramerization);GO:0043407(negative regulation of MAP kinase activity);GO:0015936(coenzyme A metabolic process);GO:0008542(visual learning);GO:0008299(isoprenoid bio…	00900(Terpenoid backbone biosynthesis);04152(AMPK signaling pathway);04976(Bile secretion)
circRNA136	108	125	149	130	176	222	294	534	368	185	181	174	13.8457	15.442	18.2105	16.5714	23.961	31.2277	41.2634	52.0196	48.2444	15.5534	14.6962	15.5648	chr3	34704652	34707464	-	3	circRNA	-	ENSSSCT00000008664	USP7	mRNA	chr3:34703880-34704651|chr3:34707464-34708626	ubiquitin specific peptidase 7 [Source:HGNC Symbol;Acc:HGNC:12630]	GO:0016604(nuclear body);GO:0005829(cytosol);GO:0005634(nucleus);GO:0051090(regulation of sequence-specific DNA binding transcription factor activity);GO:0050821(protein stabilization);GO:0035520(monoubiquitinated protein deubiquitination);GO:0032088(negative regulation of NF-kappaB transcription factor activity);GO:0016579(protein deubiquitination);GO:0010216(maintenance of DNA methylation);GO:0…	04068(FoxO signaling pathway);05203(Viral carcinogenesis);05168(Herpes simplex infection);05169(Epstein-Barr virus infection)
circRNA1360	79	78	103	63	34	73	4	5	9	75	21	14	12.8651	12.2401	15.9908	10.2012	5.87986	13.0439	0.713138	0.618717	1.49878	8.0096	2.16592	1.59081	chr2	86056742	86057720	-	2	circRNA	-	ENSSSCT00000015382	COL4A3BP	mRNA	chr2:86054020-86056741|chr2:86057720-86065161	collagen type IV alpha 3 binding protein [Source:HGNC Symbol;Acc:HGNC:2205]	GO:0048471(perinuclear region of cytoplasm);GO:0005829(cytosol);GO:0005794(Golgi apparatus);GO:0005739(mitochondrion);GO:0005654(nucleoplasm);GO:0070584(mitochondrion morphogenesis);GO:0055088(lipid homeostasis);GO:0035621(ER to Golgi ceramide transport);GO:0034976(response to endoplasmic reticulum stress);GO:0016310(phosphorylation);GO:0008283(cell proliferation);GO:0007165(signal transduction);…	NA
[truncated: 6,577 more rows]
