# Supplementary material for: Circular RNA profiling in the oocyte and cumulus cells reveals that circARMC4 is essential for porcine oocyte maturation
Source: Aging (Albany NY). 2019 Sep 28;11(18):8015–34. doi: 10.18632/aging.102315 (PMC6781969; doi:10.18632/aging.102315)
Supplement: Supplementary Table 4 [file aging-11-102315-s007.xlsx]

## Sheet: host genes in cumulus cell
														Supplementary Table 4. List of host genes producing multiple circRNAs in cumulus cells.
Accession	MCC1_MCC_fpkm	MCC2_MCC_fpkm	MCC3_MCC_fpkm	GCC1_GCC_fpkm	GCC2_GCC_fpkm	GCC3_GCC_fpkm	mean_fpkm_MCC	mean_fpkm_GCC	regulation	log2fold_change	pvalue	significant	chr	start	end	strand	exon Count	circType	circRNA category	isoformName	geneName	hosting gene type	flankIntron	gene Discription	GO	KEGG
circRNA232	5.15813	1.89142	3.8295	2.00564	1.90807	3.05766	3.62635	2.32379	up	0.64204	0.303105	no	chr1	182854630	182860290	+	4	circRNA	-	ENSSSCT00000005463	AAGAB	mRNA	chr1:182853919-182854629|chr1:182860290-182883940	alpha- and gamma-adaptin binding protein [Source:HGNC Symbol;Acc:HGNC:25662]	GO:0016607(nuclear speck);GO:0005829(cytosol);GO:0005737(cytoplasm)	NA
circRNA6667	3.99964	2.45262	3.23527	3.41774	1.68875	4.22844	3.22918	3.11164	up	0.0534898	0.900672	no	chr1	182856036	182860290	+	2	circRNA	-	ENSSSCT00000005463	AAGAB	mRNA	chr1:182855465-182856035|chr1:182860290-182883940	alpha- and gamma-adaptin binding protein [Source:HGNC Symbol;Acc:HGNC:25662]	GO:0016607(nuclear speck);GO:0005829(cytosol);GO:0005737(cytoplasm)	NA
circRNA1302	5.69068	9.43509	6.14316	8.50649	4.18716	3.32839	7.08964	5.34068	up	0.40869	0.433111	no	chr3	76322643	76324375	+	2	circRNA	-	ENSSSCT00000009130	AAK1	mRNA	chr3:76306608-76322642|chr3:76324375-76334886	AP2 associated kinase 1 [Source:HGNC Symbol;Acc:HGNC:19679]	GO:2000369(regulation of clathrin-dependent endocytosis);GO:0050821(protein stabilization);GO:0045747(positive regulation of Notch signaling pathway);GO:0032880(regulation of protein localization);GO:0006468(protein phosphorylation);GO:0035612(AP-2 adaptor complex binding);GO:0005524(ATP binding);GO:0005112(Notch binding);GO:0004672(protein kinase activity)	NA
circRNA2047	26.7165	34.9468	32.6772	5.77799	6.94827	4.87855	31.4468	5.86827	up	2.42191	0.00650954	yes	chr3	76306490	76324375	+	3	circRNA	-	ENSSSCT00000009130	AAK1	mRNA	chr3:76230710-76306489|chr3:76324375-76334886	AP2 associated kinase 1 [Source:HGNC Symbol;Acc:HGNC:19679]	GO:2000369(regulation of clathrin-dependent endocytosis);GO:0050821(protein stabilization);GO:0045747(positive regulation of Notch signaling pathway);GO:0032880(regulation of protein localization);GO:0006468(protein phosphorylation);GO:0035612(AP-2 adaptor complex binding);GO:0005524(ATP binding);GO:0005112(Notch binding);GO:0004672(protein kinase activity)	NA
circRNA5526	18.6449	20.0526	23.2449	5.88458	5.46202	2.89914	20.6475	4.74858	up	2.1204	0.00115463	yes	chr3	76349405	76364908	+	7	circRNA	-	ENSSSCT00000009130	AAK1	mRNA	chr3:76345105-76349404|chr3:76364908-76371164	AP2 associated kinase 1 [Source:HGNC Symbol;Acc:HGNC:19679]	GO:2000369(regulation of clathrin-dependent endocytosis);GO:0050821(protein stabilization);GO:0045747(positive regulation of Notch signaling pathway);GO:0032880(regulation of protein localization);GO:0006468(protein phosphorylation);GO:0035612(AP-2 adaptor complex binding);GO:0005524(ATP binding);GO:0005112(Notch binding);GO:0004672(protein kinase activity)	NA
circRNA3096	14.7308	8.37134	4.92119	2.2293	4.9439	2.98692	9.34112	3.38671	up	1.46371	0.166556	no	chr6	13376114	13376918	-	2	circRNA	-	ENSSSCT00000003017	AARS	mRNA	chr6:13375335-13376113|chr6:13376918-13381501	alanyl-tRNA synthetase [Source:HGNC Symbol;Acc:HGNC:20]	GO:0070062(extracellular exosome);GO:0016020(membrane);GO:0005829(cytosol);GO:0005737(cytoplasm);GO:0050905(neuromuscular process);GO:0050885(neuromuscular process controlling balance);GO:0043588(skin development);GO:0043524(negative regulation of neuron apoptotic process);GO:0043200(response to amino acid);GO:0043039(tRNA aminoacylation);GO:0034620(cellular response to unfolded protein);GO:00309…	00970(Aminoacyl-tRNA biosynthesis)
circRNA4414	12.5186	11.228	5.50819	6.69393	6.58677	2.28452	9.75159	5.18841	up	0.910346	0.163854	no	chr6	13369364	13371247	-	3	circRNA	-	ENSSSCT00000003017	AARS	mRNA	chr6:13367842-13369363|chr6:13371247-13371914	alanyl-tRNA synthetase [Source:HGNC Symbol;Acc:HGNC:20]	GO:0070062(extracellular exosome);GO:0016020(membrane);GO:0005829(cytosol);GO:0005737(cytoplasm);GO:0050905(neuromuscular process);GO:0050885(neuromuscular process controlling balance);GO:0043588(skin development);GO:0043524(negative regulation of neuron apoptotic process);GO:0043200(response to amino acid);GO:0043039(tRNA aminoacylation);GO:0034620(cellular response to unfolded protein);GO:00309…	00970(Aminoacyl-tRNA biosynthesis)
circRNA3997	0.232386	0	1.21848	0	1.17743	0	0.483621	0.392478	up	0.301266	0.874589	no	chr18	26606964	26614871	+	4	circRNA	-	ENSSSCT00000018087	AASS	mRNA	chr18:26604927-26606963|chr18:26614871-26618811	aminoadipate-semialdehyde synthase [Source:HGNC Symbol;Acc:HGNC:17366]	GO:0043231(intracellular membrane-bounded organelle);GO:0005739(mitochondrion);GO:0055114(oxidation-reduction process);GO:0019477(L-lysine catabolic process);GO:0047131(saccharopine dehydrogenase (NAD+, L-glutamate-forming) activity);GO:0016491(oxidoreductase activity)	00310(Lysine degradation)
circRNA5620	1.52451	0	0.96891	6.22068	1.93106	0	0.831139	2.71725	down	-1.70898	0.414177	no	chr18	26618812	26619249	+	2	circRNA	-	ENSSSCT00000018087	AASS	mRNA	chr18:26614871-26618811|chr18:26619249-26623872	aminoadipate-semialdehyde synthase [Source:HGNC Symbol;Acc:HGNC:17366]	GO:0043231(intracellular membrane-bounded organelle);GO:0005739(mitochondrion);GO:0055114(oxidation-reduction process);GO:0019477(L-lysine catabolic process);GO:0047131(saccharopine dehydrogenase (NAD+, L-glutamate-forming) activity);GO:0016491(oxidoreductase activity)	00310(Lysine degradation)
circRNA2271	0.20895	0	0	0	0	0	0.0696499	0	up	Inf	0.42265	no	chr9	102712251	102716882	+	4	circRNA	-	ENSSSCT00000031774	ABCB4	mRNA	chr9:102700207-102712250|chr9:102716882-102721151	ATP binding cassette subfamily B member 4 [Source:HGNC Symbol;Acc:HGNC:45]	GO:0070062(extracellular exosome);GO:0046581(intercellular canaliculus);GO:0016324(apical plasma membrane);GO:0016021(integral component of membrane);GO:0016020(membrane);GO:0015629(actin cytoskeleton);GO:0005925(focal adhesion);GO:0005886(plasma membrane);GO:0005829(cytosol);GO:0005737(cytoplasm);GO:0005654(nucleoplasm);GO:2001140(positive regulation of phospholipid transport);GO:1903413(cellula…	02010(ABC transporters);04976(Bile secretion)
circRNA2272	0.368597	0	0	0	0	0	0.122866	0	up	Inf	0.42265	no	chr9	102712251	102715493	+	3	circRNA	-	ENSSSCT00000031774	ABCB4	mRNA	chr9:102700207-102712250|chr9:102715493-102716678	ATP binding cassette subfamily B member 4 [Source:HGNC Symbol;Acc:HGNC:45]	GO:0070062(extracellular exosome);GO:0046581(intercellular canaliculus);GO:0016324(apical plasma membrane);GO:0016021(integral component of membrane);GO:0016020(membrane);GO:0015629(actin cytoskeleton);GO:0005925(focal adhesion);GO:0005886(plasma membrane);GO:0005829(cytosol);GO:0005737(cytoplasm);GO:0005654(nucleoplasm);GO:2001140(positive regulation of phospholipid transport);GO:1903413(cellula…	02010(ABC transporters);04976(Bile secretion)
circRNA4928	0.500494	0	0.0650643	0	0	0	0.188519	0	up	Inf	0.353038	no	chr9	102700061	102716882	+	5	circRNA	-	ENSSSCT00000031774	ABCB4	mRNA	chr9:102696841-102700060|chr9:102716882-102721151	ATP binding cassette subfamily B member 4 [Source:HGNC Symbol;Acc:HGNC:45]	GO:0070062(extracellular exosome);GO:0046581(intercellular canaliculus);GO:0016324(apical plasma membrane);GO:0016021(integral component of membrane);GO:0016020(membrane);GO:0015629(actin cytoskeleton);GO:0005925(focal adhesion);GO:0005886(plasma membrane);GO:0005829(cytosol);GO:0005737(cytoplasm);GO:0005654(nucleoplasm);GO:2001140(positive regulation of phospholipid transport);GO:1903413(cellula…	02010(ABC transporters);04976(Bile secretion)
circRNA135	11.9577	22.4168	32.9554	18.8201	3.4424	2.42721	22.4433	8.2299	up	1.44734	0.15363	no	chr3	29149383	29151969	-	2	circRNA	-	ENSSSCT00000008629	ABCC1	mRNA	chr3:29140777-29149382|chr3:29151969-29167612	ATP binding cassette subfamily C member 1 [Source:HGNC Symbol;Acc:HGNC:51]	GO:0070062(extracellular exosome);GO:0016323(basolateral plasma membrane);GO:0016021(integral component of membrane);GO:0016020(membrane);GO:0005887(integral component of plasma membrane);GO:0005886(plasma membrane);GO:0055085(transmembrane transport);GO:0042908(xenobiotic transport);GO:0034775(glutathione transmembrane transport);GO:0006855(drug transmembrane transport);GO:0006810(transport);GO:…	NA
circRNA2766	16.3336	8.36777	13.2061	0.813524	3.14271	0.865586	12.6359	1.60727	up	2.97484	0.031259	yes	chr3	29132306	29132509	-	1	circRNA	-	ENSSSCT00000008629	ABCC1	mRNA	chr3:29121751-29132305|chr3:29132509-29134575	ATP binding cassette subfamily C member 1 [Source:HGNC Symbol;Acc:HGNC:51]	GO:0070062(extracellular exosome);GO:0016323(basolateral plasma membrane);GO:0016021(integral component of membrane);GO:0016020(membrane);GO:0005887(integral component of plasma membrane);GO:0005886(plasma membrane);GO:0055085(transmembrane transport);GO:0042908(xenobiotic transport);GO:0034775(glutathione transmembrane transport);GO:0006855(drug transmembrane transport);GO:0006810(transport);GO:…	NA
circRNA1816	0.0407517	0	0	0	0	0	0.0135839	0	up	Inf	0.42265	no	chr14	120426421	120428102	+	2	circRNA	-	ENSSSCT00000011534	ABCC2	mRNA	chr14:120425641-120426420|chr14:120428102-120432675	ATP binding cassette subfamily C member 2 [Source:HGNC Symbol;Acc:HGNC:53]	GO:0046581(intercellular canaliculus);GO:0016324(apical plasma membrane);GO:0016021(integral component of membrane);GO:0016020(membrane);GO:0009986(cell surface);GO:0005887(integral component of plasma membrane);GO:0055085(transmembrane transport);GO:0032870(cellular response to hormone stimulus);GO:0015711(organic anion transport);GO:0006810(transport);GO:0042626(ATPase activity, coupled to tran…	02010(ABC transporters);04976(Bile secretion)
circRNA2641	0.209353	0.203312	0.280664	0	0	0	0.231109	0	up	Inf	0.0113545	yes	chr14	120420850	120476345	+	29	circRNA	-	ENSSSCT00000011534	ABCC2	mRNA	chr14:120404356-120420849|chr14:120476345-120478438	ATP binding cassette subfamily C member 2 [Source:HGNC Symbol;Acc:HGNC:53]	GO:0046581(intercellular canaliculus);GO:0016324(apical plasma membrane);GO:0016021(integral component of membrane);GO:0016020(membrane);GO:0009986(cell surface);GO:0005887(integral component of plasma membrane);GO:0055085(transmembrane transport);GO:0032870(cellular response to hormone stimulus);GO:0015711(organic anion transport);GO:0006810(transport);GO:0042626(ATPase activity, coupled to tran…	02010(ABC transporters);04976(Bile secretion)
circRNA3659	0.0979257	0.101103	0	0	0	0	0.066343	0	up	Inf	0.183607	no	chr14	120420850	120428102	+	7	circRNA	-	ENSSSCT00000011534	ABCC2	mRNA	chr14:120404356-120420849|chr14:120428102-120432675	ATP binding cassette subfamily C member 2 [Source:HGNC Symbol;Acc:HGNC:53]	GO:0046581(intercellular canaliculus);GO:0016324(apical plasma membrane);GO:0016021(integral component of membrane);GO:0016020(membrane);GO:0009986(cell surface);GO:0005887(integral component of plasma membrane);GO:0055085(transmembrane transport);GO:0032870(cellular response to hormone stimulus);GO:0015711(organic anion transport);GO:0006810(transport);GO:0042626(ATPase activity, coupled to tran…	02010(ABC transporters);04976(Bile secretion)
circRNA1457	3.86245	2.97754	4.56594	9.16928	0.684949	3.55746	3.80198	4.47056	down	-0.233706	0.815155	no	chr1	304806907	304807179	+	1	circRNA	-	ENSSSCT00000006275	ABL1	mRNA	chr1:304798876-304806906|chr1:304807179-304815264	ABL proto-oncogene 1, non-receptor tyrosine kinase [Source:HGNC Symbol;Acc:HGNC:76]	GO:0048471(perinuclear region of cytoplasm);GO:0031252(cell leading edge);GO:0031234(extrinsic component of cytoplasmic side of plasma membrane);GO:0016604(nuclear body);GO:0015629(actin cytoskeleton);GO:0005829(cytosol);GO:0005737(cytoplasm);GO:0005730(nucleolus);GO:0005654(nucleoplasm);GO:0005634(nucleus);GO:2001020(regulation of response to DNA damage stimulus);GO:2000773(negative regulation o…	04014(Ras signaling pathway);04012(ErbB signaling pathway);04110(Cell cycle);04722(Neurotrophin signaling pathway);04360(Axon guidance);05200(Pathways in cancer);05206(MicroRNAs in cancer);05220(Chronic myeloid leukemia);05416(Viral myocarditis)
circRNA255	15.9738	15.6521	14.7151	19.2736	27.3382	26.8626	15.447	24.4915	down	-0.664956	0.0713962	no	chr1	304797554	304798876	+	2	circRNA	-	ENSSSCT00000006275	ABL1	mRNA	chr1:304686024-304797553|chr1:304798876-304806906	ABL proto-oncogene 1, non-receptor tyrosine kinase [Source:HGNC Symbol;Acc:HGNC:76]	GO:0048471(perinuclear region of cytoplasm);GO:0031252(cell leading edge);GO:0031234(extrinsic component of cytoplasmic side of plasma membrane);GO:0016604(nuclear body);GO:0015629(actin cytoskeleton);GO:0005829(cytosol);GO:0005737(cytoplasm);GO:0005730(nucleolus);GO:0005654(nucleoplasm);GO:0005634(nucleus);GO:2001020(regulation of response to DNA damage stimulus);GO:2000773(negative regulation o…	04014(Ras signaling pathway);04012(ErbB signaling pathway);04110(Cell cycle);04722(Neurotrophin signaling pathway);04360(Axon guidance);05200(Pathways in cancer);05206(MicroRNAs in cancer);05220(Chronic myeloid leukemia);05416(Viral myocarditis)
circRNA5608	7.44318	2.70956	7.56889	15.9451	8.90434	14.5418	5.90721	13.1304	down	-1.15236	0.0592474	no	chr1	304822634	304823214	+	2	circRNA	-	ENSSSCT00000006275	ABL1	mRNA	chr1:304820843-304822633|chr1:304823214-304825989	ABL proto-oncogene 1, non-receptor tyrosine kinase [Source:HGNC Symbol;Acc:HGNC:76]	GO:0048471(perinuclear region of cytoplasm);GO:0031252(cell leading edge);GO:0031234(extrinsic component of cytoplasmic side of plasma membrane);GO:0016604(nuclear body);GO:0015629(actin cytoskeleton);GO:0005829(cytosol);GO:0005737(cytoplasm);GO:0005730(nucleolus);GO:0005654(nucleoplasm);GO:0005634(nucleus);GO:2001020(regulation of response to DNA damage stimulus);GO:2000773(negative regulation o…	04014(Ras signaling pathway);04012(ErbB signaling pathway);04110(Cell cycle);04722(Neurotrophin signaling pathway);04360(Axon guidance);05200(Pathways in cancer);05206(MicroRNAs in cancer);05220(Chronic myeloid leukemia);05416(Viral myocarditis)
circRNA1519	1.90929	2.17434	10.4248	3.18714	7.36532	0.484443	4.83613	3.67897	up	0.394552	0.755011	no	chr9	132677909	132678993	-	2	circRNA	-	ENSSSCT00000027500	ABL2	mRNA	chr9:132674255-132677908|chr9:132678993-132680151	ABL proto-oncogene 2, non-receptor tyrosine kinase [Source:HGNC Symbol;Acc:HGNC:77]	GO:0031234(extrinsic component of cytoplasmic side of plasma membrane);GO:0071300(cellular response to retinoic acid);GO:0051353(positive regulation of oxidoreductase activity);GO:0045087(innate immune response);GO:0042127(regulation of cell proliferation);GO:0038083(peptidyl-tyrosine autophosphorylation);GO:0030154(cell differentiation);GO:0018108(peptidyl-tyrosine phosphorylation);GO:0016310(ph…	04014(Ras signaling pathway);04012(ErbB signaling pathway);05416(Viral myocarditis)
circRNA6727	3.06421	4.51594	6.87346	0	3.76722	1.88653	4.81787	1.88459	up	1.35415	0.132135	no	chr9	132691580	132693397	-	2	circRNA	-	ENSSSCT00000027500	ABL2	mRNA	chr9:132687375-132691579|chr9:132693397-132782299	ABL proto-oncogene 2, non-receptor tyrosine kinase [Source:HGNC Symbol;Acc:HGNC:77]	GO:0031234(extrinsic component of cytoplasmic side of plasma membrane);GO:0071300(cellular response to retinoic acid);GO:0051353(positive regulation of oxidoreductase activity);GO:0045087(innate immune response);GO:0042127(regulation of cell proliferation);GO:0038083(peptidyl-tyrosine autophosphorylation);GO:0030154(cell differentiation);GO:0018108(peptidyl-tyrosine phosphorylation);GO:0016310(ph…	04014(Ras signaling pathway);04012(ErbB signaling pathway);05416(Viral myocarditis)
circRNA1650	6.56102	9.25768	8.71211	0	2.81971	0.653999	8.17694	1.1579	up	2.82005	0.00408219	yes	chr12	40294951	40297612	-	2	circRNA	-	ENSSSCT00000019259	ACACA	mRNA	chr12:40289466-40294950|chr12:40297612-40299443	acetyl-CoA carboxylase alpha [Source:HGNC Symbol;Acc:HGNC:84]	GO:0070062(extracellular exosome);GO:0015629(actin cytoskeleton);GO:0005829(cytosol);GO:0005739(mitochondrion);GO:0001650(fibrillar center);GO:0071380(cellular response to prostaglandin E stimulus);GO:0055088(lipid homeostasis);GO:0051289(protein homotetramerization);GO:0044268(multicellular organismal protein metabolic process);GO:0006633(fatty acid biosynthetic process);GO:0006629(lipid metabol…	01212(Fatty acid metabolism);00620(Pyruvate metabolism);00640(Propanoate metabolism);00061(Fatty acid biosynthesis);00524(Butirosin and neomycin biosynthesis);04152(AMPK signaling pathway);04910(Insulin signaling pathway);04922(Glucagon signaling pathway)
circRNA6231	2.41017	5.2901	4.5954	0.965898	1.52646	1.49485	4.09856	1.32907	up	1.6247	0.079956	no	chr12	40342412	40345546	-	2	circRNA	-	ENSSSCT00000019259	ACACA	mRNA	chr12:40341098-40342411|chr12:40345546-40346105	acetyl-CoA carboxylase alpha [Source:HGNC Symbol;Acc:HGNC:84]	GO:0070062(extracellular exosome);GO:0015629(actin cytoskeleton);GO:0005829(cytosol);GO:0005739(mitochondrion);GO:0001650(fibrillar center);GO:0071380(cellular response to prostaglandin E stimulus);GO:0055088(lipid homeostasis);GO:0051289(protein homotetramerization);GO:0044268(multicellular organismal protein metabolic process);GO:0006633(fatty acid biosynthetic process);GO:0006629(lipid metabol…	01212(Fatty acid metabolism);00620(Pyruvate metabolism);00640(Propanoate metabolism);00061(Fatty acid biosynthesis);00524(Butirosin and neomycin biosynthesis);04152(AMPK signaling pathway);04910(Insulin signaling pathway);04922(Glucagon signaling pathway)
circRNA6828	2.36713	2.38469	0.205152	4.51589	0	0.600611	1.65233	1.7055	down	-0.045696	0.975437	no	chr12	40361335	40362796	-	5	circRNA	-	ENSSSCT00000019259	ACACA	mRNA	chr12:40357665-40361334|chr12:40362796-40367843	acetyl-CoA carboxylase alpha [Source:HGNC Symbol;Acc:HGNC:84]	GO:0070062(extracellular exosome);GO:0015629(actin cytoskeleton);GO:0005829(cytosol);GO:0005739(mitochondrion);GO:0001650(fibrillar center);GO:0071380(cellular response to prostaglandin E stimulus);GO:0055088(lipid homeostasis);GO:0051289(protein homotetramerization);GO:0044268(multicellular organismal protein metabolic process);GO:0006633(fatty acid biosynthetic process);GO:0006629(lipid metabol…	01212(Fatty acid metabolism);00620(Pyruvate metabolism);00640(Propanoate metabolism);00061(Fatty acid biosynthesis);00524(Butirosin and neomycin biosynthesis);04152(AMPK signaling pathway);04910(Insulin signaling pathway);04922(Glucagon signaling pathway)
circRNA1784	0	0	0.277309	0	1.38171	2.43558	0.0924362	1.27243	down	-3.78298	0.234849	no	chr14	44201888	44204705	-	2	circRNA	-	ENSSSCT00000010889	ACACB	mRNA	chr14:44201097-44201887|chr14:44204705-44205367	acetyl-CoA carboxylase beta [Source:HGNC Symbol;Acc:HGNC:85]	GO:0005739(mitochondrion);GO:0005634(nucleus);GO:2001295(malonyl-CoA biosynthetic process);GO:0097009(energy homeostasis);GO:0060421(positive regulation of heart growth);GO:0051289(protein homotetramerization);GO:0050995(negative regulation of lipid catabolic process);GO:0046322(negative regulation of fatty acid oxidation);GO:0043086(negative regulation of catalytic activity);GO:0031999(negative …	01212(Fatty acid metabolism);00620(Pyruvate metabolism);00640(Propanoate metabolism);00061(Fatty acid biosynthesis);00524(Butirosin and neomycin biosynthesis);04152(AMPK signaling pathway);04910(Insulin signaling pathway);04922(Glucagon signaling pathway)
circRNA3627	0.0776759	0	0	2.19037	2.0662	0.785882	0.025892	1.68082	down	-6.02052	0.0658717	no	chr14	44167298	44170488	-	3	circRNA	-	ENSSSCT00000010889	ACACB	mRNA	chr14:44164937-44167297|chr14:44170488-44171730	acetyl-CoA carboxylase beta [Source:HGNC Symbol;Acc:HGNC:85]	GO:0005739(mitochondrion);GO:0005634(nucleus);GO:2001295(malonyl-CoA biosynthetic process);GO:0097009(energy homeostasis);GO:0060421(positive regulation of heart growth);GO:0051289(protein homotetramerization);GO:0050995(negative regulation of lipid catabolic process);GO:0046322(negative regulation of fatty acid oxidation);GO:0043086(negative regulation of catalytic activity);GO:0031999(negative …	01212(Fatty acid metabolism);00620(Pyruvate metabolism);00640(Propanoate metabolism);00061(Fatty acid biosynthesis);00524(Butirosin and neomycin biosynthesis);04152(AMPK signaling pathway);04910(Insulin signaling pathway);04922(Glucagon signaling pathway)
circRNA4298	0	0	0	8.04351	0	1.74658	0	3.26336	down	-Inf	0.313286	no	chr14	44212456	44214448	-	3	circRNA	-	ENSSSCT00000010889	ACACB	mRNA	chr14:44210125-44212455|chr14:44214448-44215361	acetyl-CoA carboxylase beta [Source:HGNC Symbol;Acc:HGNC:85]	GO:0005739(mitochondrion);GO:0005634(nucleus);GO:2001295(malonyl-CoA biosynthetic process);GO:0097009(energy homeostasis);GO:0060421(positive regulation of heart growth);GO:0051289(protein homotetramerization);GO:0050995(negative regulation of lipid catabolic process);GO:0046322(negative regulation of fatty acid oxidation);GO:0043086(negative regulation of catalytic activity);GO:0031999(negative …	01212(Fatty acid metabolism);00620(Pyruvate metabolism);00640(Propanoate metabolism);00061(Fatty acid biosynthesis);00524(Butirosin and neomycin biosynthesis);04152(AMPK signaling pathway);04910(Insulin signaling pathway);04922(Glucagon signaling pathway)
circRNA505	0.128985	0	0	3.63722	0.980294	0.899998	0.0429949	1.83917	down	-5.41875	0.183609	no	chr14	44167298	44169397	-	2	circRNA	-	ENSSSCT00000010889	ACACB	mRNA	chr14:44164937-44167297|chr14:44169397-44170344	acetyl-CoA carboxylase beta [Source:HGNC Symbol;Acc:HGNC:85]	GO:0005739(mitochondrion);GO:0005634(nucleus);GO:2001295(malonyl-CoA biosynthetic process);GO:0097009(energy homeostasis);GO:0060421(positive regulation of heart growth);GO:0051289(protein homotetramerization);GO:0050995(negative regulation of lipid catabolic process);GO:0046322(negative regulation of fatty acid oxidation);GO:0043086(negative regulation of catalytic activity);GO:0031999(negative …	01212(Fatty acid metabolism);00620(Pyruvate metabolism);00640(Propanoate metabolism);00061(Fatty acid biosynthesis);00524(Butirosin and neomycin biosynthesis);04152(AMPK signaling pathway);04910(Insulin signaling pathway);04922(Glucagon signaling pathway)
circRNA5773	0.0473378	0	0	3.52344	3.68766	2.26257	0.0157793	3.15789	down	-7.64479	0.0198093	yes	chr14	44167298	44172408	-	5	circRNA	-	ENSSSCT00000010889	ACACB	mRNA	chr14:44164937-44167297|chr14:44172408-44174069	acetyl-CoA carboxylase beta [Source:HGNC Symbol;Acc:HGNC:85]	GO:0005739(mitochondrion);GO:0005634(nucleus);GO:2001295(malonyl-CoA biosynthetic process);GO:0097009(energy homeostasis);GO:0060421(positive regulation of heart growth);GO:0051289(protein homotetramerization);GO:0050995(negative regulation of lipid catabolic process);GO:0046322(negative regulation of fatty acid oxidation);GO:0043086(negative regulation of catalytic activity);GO:0031999(negative …	01212(Fatty acid metabolism);00620(Pyruvate metabolism);00640(Propanoate metabolism);00061(Fatty acid biosynthesis);00524(Butirosin and neomycin biosynthesis);04152(AMPK signaling pathway);04910(Insulin signaling pathway);04922(Glucagon signaling pathway)
circRNA6930	0	0	0	0.0869805	2.01608	0.555282	0	0.886113	down	-Inf	0.266687	no	chr14	44195226	44196279	-	3	circRNA	-	ENSSSCT00000010889	ACACB	mRNA	chr14:44191990-44195225|chr14:44196279-44200791	acetyl-CoA carboxylase beta [Source:HGNC Symbol;Acc:HGNC:85]	GO:0005739(mitochondrion);GO:0005634(nucleus);GO:2001295(malonyl-CoA biosynthetic process);GO:0097009(energy homeostasis);GO:0060421(positive regulation of heart growth);GO:0051289(protein homotetramerization);GO:0050995(negative regulation of lipid catabolic process);GO:0046322(negative regulation of fatty acid oxidation);GO:0043086(negative regulation of catalytic activity);GO:0031999(negative …	01212(Fatty acid metabolism);00620(Pyruvate metabolism);00640(Propanoate metabolism);00061(Fatty acid biosynthesis);00524(Butirosin and neomycin biosynthesis);04152(AMPK signaling pathway);04910(Insulin signaling pathway);04922(Glucagon signaling pathway)
circRNA1496	1.05153	1.85767	2.06061	2.03043	6.40077	3.3017	1.6566	3.91096	down	-1.2393	0.220359	no	chr9	40614116	40617293	+	3	circRNA	-	ENSSSCT00000028484	ACAT1	mRNA	chr9:40613454-40614115|chr9:40617293-40619139	acetyl-CoA acetyltransferase 1 [Source:HGNC Symbol;Acc:HGNC:93]	GO:0070062(extracellular exosome);GO:0005743(mitochondrial inner membrane);GO:0005739(mitochondrion);GO:1902860(propionyl-CoA biosynthetic process);GO:0046952(ketone body catabolic process);GO:0046356(acetyl-CoA catabolic process);GO:0015937(coenzyme A biosynthetic process);GO:0015936(coenzyme A metabolic process);GO:0008152(metabolic process);GO:0006635(fatty acid beta-oxidation);GO:0006550(isol…	01200(Carbon metabolism);01212(Fatty acid metabolism);00620(Pyruvate metabolism);00630(Glyoxylate and dicarboxylate metabolism);00640(Propanoate metabolism);00650(Butanoate metabolism);00071(Fatty acid degradation);00072(Synthesis and degradation of ketone bodies);00280(Valine, leucine and isoleucine degradation);00310(Lysine degradation);00380(Tryptophan metabolism);00900(Terpenoid backbone bios…
circRNA5626	0.853806	0.57592	0.732566	2.96755	2.75782	1.96597	0.720764	2.56378	down	-1.83067	0.0205858	yes	chr9	40614116	40615184	+	2	circRNA	-	ENSSSCT00000028484	ACAT1	mRNA	chr9:40613454-40614115|chr9:40615184-40617179	acetyl-CoA acetyltransferase 1 [Source:HGNC Symbol;Acc:HGNC:93]	GO:0070062(extracellular exosome);GO:0005743(mitochondrial inner membrane);GO:0005739(mitochondrion);GO:1902860(propionyl-CoA biosynthetic process);GO:0046952(ketone body catabolic process);GO:0046356(acetyl-CoA catabolic process);GO:0015937(coenzyme A biosynthetic process);GO:0015936(coenzyme A metabolic process);GO:0008152(metabolic process);GO:0006635(fatty acid beta-oxidation);GO:0006550(isol…	01200(Carbon metabolism);01212(Fatty acid metabolism);00620(Pyruvate metabolism);00630(Glyoxylate and dicarboxylate metabolism);00640(Propanoate metabolism);00650(Butanoate metabolism);00071(Fatty acid degradation);00072(Synthesis and degradation of ketone bodies);00280(Valine, leucine and isoleucine degradation);00310(Lysine degradation);00380(Tryptophan metabolism);00900(Terpenoid backbone bios…
circRNA2497	1.63798	1.31532	0.845836	10.5626	12.7946	2.42868	1.26638	8.59531	down	-2.76284	0.144751	no	chr10	54218225	54223208	-	3	circRNA	-	ENSSSCT00000012108	ACBD5	mRNA	chr10:54213906-54218224|chr10:54223208-54227075	acyl-CoA binding domain containing 5 [Source:HGNC Symbol;Acc:HGNC:23338]	GO:0016021(integral component of membrane);GO:0016020(membrane);GO:0005777(peroxisome);GO:0005654(nucleoplasm);GO:0005634(nucleus);GO:0030242(pexophagy);GO:0006810(transport);GO:0008289(lipid binding);GO:0000062(fatty-acyl-CoA binding)	NA
circRNA6266	1.52189	1.25701	1.34723	9.12489	5.92093	0.227551	1.37538	5.09112	down	-1.88815	0.289377	no	chr10	54221524	54223208	-	2	circRNA	-	ENSSSCT00000012108	ACBD5	mRNA	chr10:54218339-54221523|chr10:54223208-54227075	acyl-CoA binding domain containing 5 [Source:HGNC Symbol;Acc:HGNC:23338]	GO:0016021(integral component of membrane);GO:0016020(membrane);GO:0005777(peroxisome);GO:0005654(nucleoplasm);GO:0005634(nucleus);GO:0030242(pexophagy);GO:0006810(transport);GO:0008289(lipid binding);GO:0000062(fatty-acyl-CoA binding)	NA
circRNA1438	2.29763	0.711656	0.156458	0	0	1.60319	1.05525	0.534396	up	0.981604	0.567601	no	chr1	227054161	227055172	-	2	circRNA	-	ENSSSCT00000030545	ACER2	mRNA	chr1:227048159-227054160|chr1:227055172-227065626	alkaline ceramidase 2 [Source:HGNC Symbol;Acc:HGNC:23675]	GO:0030173(integral component of Golgi membrane);GO:0016021(integral component of membrane);GO:0016020(membrane);GO:0005794(Golgi apparatus);GO:0090285(negative regulation of protein glycosylation in Golgi);GO:0046512(sphingosine biosynthetic process);GO:0035690(cellular response to drug);GO:0033629(negative regulation of cell adhesion mediated by integrin);GO:0032526(response to retinoic acid);G…	00600(Sphingolipid metabolism);04071(Sphingolipid signaling pathway)
circRNA240	4.48475	1.69777	2.03594	0	0	2.16068	2.73948	0.720226	up	1.92738	0.152765	no	chr1	227048022	227055172	-	3	circRNA	-	ENSSSCT00000030545	ACER2	mRNA	chr1:227044239-227048021|chr1:227055172-227065626	alkaline ceramidase 2 [Source:HGNC Symbol;Acc:HGNC:23675]	GO:0030173(integral component of Golgi membrane);GO:0016021(integral component of membrane);GO:0016020(membrane);GO:0005794(Golgi apparatus);GO:0090285(negative regulation of protein glycosylation in Golgi);GO:0046512(sphingosine biosynthetic process);GO:0035690(cellular response to drug);GO:0033629(negative regulation of cell adhesion mediated by integrin);GO:0032526(response to retinoic acid);G…	00600(Sphingolipid metabolism);04071(Sphingolipid signaling pathway)
circRNA2415	12.987	10.3331	5.225	8.67299	10.1117	5.48694	9.51503	8.09055	up	0.233971	0.626069	no	chr12	5476779	5477978	-	2	circRNA	-	ENSSSCT00000018723	ACOX1	mRNA	chr12:5476208-5476778|chr12:5477978-5479392	acyl-CoA oxidase 1 [Source:HGNC Symbol;Acc:HGNC:119]	GO:0043231(intracellular membrane-bounded organelle);GO:0016020(membrane);GO:0005886(plasma membrane);GO:0005778(peroxisomal membrane);GO:0005777(peroxisome);GO:0005739(mitochondrion);GO:0005737(cytoplasm);GO:0005730(nucleolus);GO:0005654(nucleoplasm);GO:0005634(nucleus);GO:0055114(oxidation-reduction process);GO:0033540(fatty acid beta-oxidation using acyl-CoA oxidase);GO:0019395(fatty acid oxid…	01212(Fatty acid metabolism);00071(Fatty acid degradation);00592(alpha-Linolenic acid metabolism);01040(Biosynthesis of unsaturated fatty acids);04024(cAMP signaling pathway);04146(Peroxisome);03320(PPAR signaling pathway)
circRNA769	7.47984	4.40471	5.24906	9.8785	5.00047	4.71169	5.7112	6.53022	down	-0.193337	0.696248	no	chr12	5479393	5480365	-	3	circRNA	-	ENSSSCT00000018723	ACOX1	mRNA	chr12:5477978-5479392|chr12:5480365-5482508	acyl-CoA oxidase 1 [Source:HGNC Symbol;Acc:HGNC:119]	GO:0043231(intracellular membrane-bounded organelle);GO:0016020(membrane);GO:0005886(plasma membrane);GO:0005778(peroxisomal membrane);GO:0005777(peroxisome);GO:0005739(mitochondrion);GO:0005737(cytoplasm);GO:0005730(nucleolus);GO:0005654(nucleoplasm);GO:0005634(nucleus);GO:0055114(oxidation-reduction process);GO:0033540(fatty acid beta-oxidation using acyl-CoA oxidase);GO:0019395(fatty acid oxid…	01212(Fatty acid metabolism);00071(Fatty acid degradation);00592(alpha-Linolenic acid metabolism);01040(Biosynthesis of unsaturated fatty acids);04024(cAMP signaling pathway);04146(Peroxisome);03320(PPAR signaling pathway)
circRNA4249	2.42402	1.16792	0.924362	0	0	0.67655	1.50543	0.225517	up	2.73887	0.0925594	no	chr15	52536904	52541936	-	3	circRNA	-	ENSSSCT00000017187	ACSL1	mRNA	chr15:52535842-52536903|chr15:52541936-52544452	acyl-CoA synthetase long-chain family member 1 [Source:HGNC Symbol;Acc:HGNC:3569]	GO:0016020(membrane);GO:0005739(mitochondrion);GO:0071902(positive regulation of protein serine/threonine kinase activity);GO:0044539(long-chain fatty acid import);GO:0033211(adiponectin-activated signaling pathway);GO:0008610(lipid biosynthetic process);GO:0008152(metabolic process);GO:0001676(long-chain fatty acid metabolic process);GO:0004467(long-chain fatty acid-CoA ligase activity);GO:00038…	01212(Fatty acid metabolism);00061(Fatty acid biosynthesis);00071(Fatty acid degradation);04146(Peroxisome);04920(Adipocytokine signaling pathway);03320(PPAR signaling pathway)
circRNA6898	1.40593	0	0	0	0	0.871998	0.468645	0.290666	up	0.689132	0.766058	no	chr15	52536904	52539487	-	2	circRNA	-	ENSSSCT00000017187	ACSL1	mRNA	chr15:52535842-52536903|chr15:52539487-52541858	acyl-CoA synthetase long-chain family member 1 [Source:HGNC Symbol;Acc:HGNC:3569]	GO:0016020(membrane);GO:0005739(mitochondrion);GO:0071902(positive regulation of protein serine/threonine kinase activity);GO:0044539(long-chain fatty acid import);GO:0033211(adiponectin-activated signaling pathway);GO:0008610(lipid biosynthetic process);GO:0008152(metabolic process);GO:0001676(long-chain fatty acid metabolic process);GO:0004467(long-chain fatty acid-CoA ligase activity);GO:00038…	01212(Fatty acid metabolism);00061(Fatty acid biosynthesis);00071(Fatty acid degradation);04146(Peroxisome);04920(Adipocytokine signaling pathway);03320(PPAR signaling pathway)
circRNA1760	0.931643	2.77486	3.55267	12.1081	0.429125	0	2.41972	4.17908	down	-0.788343	0.703134	no	chr15	138692022	138693312	+	2	circRNA	-	ENSSSCT00000017665	ACSL3	mRNA	chr15:138689733-138692021|chr15:138693312-138695718	acyl-CoA synthetase long-chain family member 3 [Source:HGNC Symbol;Acc:HGNC:3570]	GO:0048471(perinuclear region of cytoplasm);GO:0016021(integral component of membrane);GO:0016020(membrane);GO:0005811(lipid particle);GO:0005794(Golgi apparatus);GO:0005783(endoplasmic reticulum);GO:2001247(positive regulation of phosphatidylcholine biosynthetic process);GO:0051047(positive regulation of secretion);GO:0044539(long-chain fatty acid import);GO:0042998(positive regulation of Golgi …	01212(Fatty acid metabolism);00061(Fatty acid biosynthesis);00071(Fatty acid degradation);04146(Peroxisome);04920(Adipocytokine signaling pathway);03320(PPAR signaling pathway)
circRNA5307	0.708024	1.36453	0	0.663305	0.38436	0.846905	0.690851	0.631523	up	0.129539	0.897524	no	chr15	138681122	138681538	+	1	circRNA	-	ENSSSCT00000017665	ACSL3	mRNA	chr15:138663767-138681121|chr15:138681538-138689555	acyl-CoA synthetase long-chain family member 3 [Source:HGNC Symbol;Acc:HGNC:3570]	GO:0048471(perinuclear region of cytoplasm);GO:0016021(integral component of membrane);GO:0016020(membrane);GO:0005811(lipid particle);GO:0005794(Golgi apparatus);GO:0005783(endoplasmic reticulum);GO:2001247(positive regulation of phosphatidylcholine biosynthetic process);GO:0051047(positive regulation of secretion);GO:0044539(long-chain fatty acid import);GO:0042998(positive regulation of Golgi …	01212(Fatty acid metabolism);00061(Fatty acid biosynthesis);00071(Fatty acid degradation);04146(Peroxisome);04920(Adipocytokine signaling pathway);03320(PPAR signaling pathway)
circRNA6916	7.3538	3.27959	2.08581	0	4.31104	0.763312	4.23973	1.69145	up	1.32571	0.288846	no	chr15	138695719	138697358	+	3	circRNA	-	ENSSSCT00000017665	ACSL3	mRNA	chr15:138693312-138695718|chr15:138697358-138698938	acyl-CoA synthetase long-chain family member 3 [Source:HGNC Symbol;Acc:HGNC:3570]	GO:0048471(perinuclear region of cytoplasm);GO:0016021(integral component of membrane);GO:0016020(membrane);GO:0005811(lipid particle);GO:0005794(Golgi apparatus);GO:0005783(endoplasmic reticulum);GO:2001247(positive regulation of phosphatidylcholine biosynthetic process);GO:0051047(positive regulation of secretion);GO:0044539(long-chain fatty acid import);GO:0042998(positive regulation of Golgi …	01212(Fatty acid metabolism);00061(Fatty acid biosynthesis);00071(Fatty acid degradation);04146(Peroxisome);04920(Adipocytokine signaling pathway);03320(PPAR signaling pathway)
circRNA1244	14.0428	18.8442	15.6381	1.2385	2.64092	1.79884	16.175	1.89276	up	3.09521	0.00615796	yes	chr5	105210066	105265163	-	5	circRNA	-	ENSSSCT00000001027	ACSS3	mRNA	chr5:105198927-105210065|chr5:105265163-105276875	acyl-CoA synthetase short-chain family member 3 [Source:HGNC Symbol;Acc:HGNC:24723]	GO:0005739(mitochondrion);GO:0008152(metabolic process);GO:0003824(catalytic activity)	00640(Propanoate metabolism)
circRNA1245	14.7623	16.3409	12.1547	1.59139	3.15921	2.02919	14.4193	2.25993	up	2.67365	0.00476418	yes	chr5	105210066	105250420	-	4	circRNA	-	ENSSSCT00000001027	ACSS3	mRNA	chr5:105198927-105210065|chr5:105250420-105265059	acyl-CoA synthetase short-chain family member 3 [Source:HGNC Symbol;Acc:HGNC:24723]	GO:0005739(mitochondrion);GO:0008152(metabolic process);GO:0003824(catalytic activity)	00640(Propanoate metabolism)
circRNA1246	5.83175	5.56428	4.7997	0.094081	0.603655	0.566201	5.39858	0.421312	up	3.67962	0.000699673	yes	chr5	105296613	105332428	-	7	circRNA	-	ENSSSCT00000001027	ACSS3	mRNA	chr5:105277027-105296612|chr5:105332428-105367973	acyl-CoA synthetase short-chain family member 3 [Source:HGNC Symbol;Acc:HGNC:24723]	GO:0005739(mitochondrion);GO:0008152(metabolic process);GO:0003824(catalytic activity)	00640(Propanoate metabolism)
circRNA1974	6.3267	6.28968	6.08905	2.02587	0.886956	0.201181	6.23515	1.038	up	2.58662	0.00928328	yes	chr5	105265060	105277027	-	2	circRNA	-	ENSSSCT00000001027	ACSS3	mRNA	chr5:105250420-105265059|chr5:105277027-105296612	acyl-CoA synthetase short-chain family member 3 [Source:HGNC Symbol;Acc:HGNC:24723]	GO:0005739(mitochondrion);GO:0008152(metabolic process);GO:0003824(catalytic activity)	00640(Propanoate metabolism)
circRNA3158	6.84061	12.796	12.3219	0	1.09955	1.13335	10.6528	0.7443	up	3.83921	0.0313156	yes	chr5	105247263	105265163	-	3	circRNA	-	ENSSSCT00000001027	ACSS3	mRNA	chr5:105213006-105247262|chr5:105265163-105276875	acyl-CoA synthetase short-chain family member 3 [Source:HGNC Symbol;Acc:HGNC:24723]	GO:0005739(mitochondrion);GO:0008152(metabolic process);GO:0003824(catalytic activity)	00640(Propanoate metabolism)
circRNA3159	5.98624	7.21882	6.40858	0.903522	0.779518	0.743439	6.53788	0.808826	up	3.01492	0.00346811	yes	chr5	105265060	105306144	-	5	circRNA	-	ENSSSCT00000001027	ACSS3	mRNA	chr5:105250420-105265059|chr5:105306144-105309487	acyl-CoA synthetase short-chain family member 3 [Source:HGNC Symbol;Acc:HGNC:24723]	GO:0005739(mitochondrion);GO:0008152(metabolic process);GO:0003824(catalytic activity)	00640(Propanoate metabolism)
circRNA3160	4.31352	6.06049	4.71253	1.10345	0.770131	0.907945	5.02885	0.927175	up	2.43931	0.0138986	yes	chr5	105276876	105306144	-	4	circRNA	-	ENSSSCT00000001027	ACSS3	mRNA	chr5:105265163-105276875|chr5:105306144-105309487	acyl-CoA synthetase short-chain family member 3 [Source:HGNC Symbol;Acc:HGNC:24723]	GO:0005739(mitochondrion);GO:0008152(metabolic process);GO:0003824(catalytic activity)	00640(Propanoate metabolism)
circRNA3161	7.04588	6.18245	5.50704	0.121515	0.557438	0.11313	6.24512	0.264028	up	4.56397	0.00276529	yes	chr5	105306004	105332428	-	5	circRNA	-	ENSSSCT00000001027	ACSS3	mRNA	chr5:105296870-105306003|chr5:105332428-105367973	acyl-CoA synthetase short-chain family member 3 [Source:HGNC Symbol;Acc:HGNC:24723]	GO:0005739(mitochondrion);GO:0008152(metabolic process);GO:0003824(catalytic activity)	00640(Propanoate metabolism)
circRNA4531	12.5677	9.92956	6.37472	2.83344	2.73646	0.574243	9.62398	2.04805	up	2.23239	0.0370152	yes	chr5	105210066	105213006	-	2	circRNA	-	ENSSSCT00000001027	ACSS3	mRNA	chr5:105198927-105210065|chr5:105213006-105247262	acyl-CoA synthetase short-chain family member 3 [Source:HGNC Symbol;Acc:HGNC:24723]	GO:0005739(mitochondrion);GO:0008152(metabolic process);GO:0003824(catalytic activity)	00640(Propanoate metabolism)
circRNA4532	7.07563	7.59264	6.33368	0.569597	0.627157	0.47635	7.00065	0.557701	up	3.64992	0.00285754	yes	chr5	105265060	105332428	-	9	circRNA	-	ENSSSCT00000001027	ACSS3	mRNA	chr5:105250420-105265059|chr5:105332428-105367973	acyl-CoA synthetase short-chain family member 3 [Source:HGNC Symbol;Acc:HGNC:24723]	GO:0005739(mitochondrion);GO:0008152(metabolic process);GO:0003824(catalytic activity)	00640(Propanoate metabolism)
ciRNA100	43.4032	36.1146	33.3741	11.4591	14.5777	8.07221	37.6306	11.3697	up	1.72672	0.00336617	yes	chr12	1163312	1163661	+	1	ciRNA	-	ENSSSCT00000025260	ACTG1	mRNA	chr12:1163311-1163686	actin gamma 1 [Source:HGNC Symbol;Acc:HGNC:144]	GO:0097433(dense body);GO:0072562(blood microparticle);GO:0070062(extracellular exosome);GO:0043209(myelin sheath);GO:0031941(filamentous actin);GO:0031012(extracellular matrix);GO:0030016(myofibril);GO:0016020(membrane);GO:0015629(actin cytoskeleton);GO:0005925(focal adhesion);GO:0005886(plasma membrane);GO:0005856(cytoskeleton);GO:0005634(nucleus);GO:0005615(extracellular space);GO:0070527(plat…	04015(Rap1 signaling pathway);04390(Hippo signaling pathway);04145(Phagosome);04810(Regulation of actin cytoskeleton);04510(Focal adhesion);04520(Adherens junction);04530(Tight junction);04611(Platelet activation);04670(Leukocyte transendothelial migration);04921(Oxytocin signaling pathway);04919(Thyroid hormone signaling pathway);05205(Proteoglycans in cancer);05410(Hypertrophic cardiomyopathy (…
ciRNA19	41.5922	36.3222	32.7571	11.5249	14.6615	8.1186	36.8905	11.435	up	1.68979	0.00188407	yes	chr12	1163312	1163659	+	1	ciRNA	-	ENSSSCT00000025260	ACTG1	mRNA	chr12:1163311-1163686	actin gamma 1 [Source:HGNC Symbol;Acc:HGNC:144]	GO:0097433(dense body);GO:0072562(blood microparticle);GO:0070062(extracellular exosome);GO:0043209(myelin sheath);GO:0031941(filamentous actin);GO:0031012(extracellular matrix);GO:0030016(myofibril);GO:0016020(membrane);GO:0015629(actin cytoskeleton);GO:0005925(focal adhesion);GO:0005886(plasma membrane);GO:0005856(cytoskeleton);GO:0005634(nucleus);GO:0005615(extracellular space);GO:0070527(plat…	04015(Rap1 signaling pathway);04390(Hippo signaling pathway);04145(Phagosome);04810(Regulation of actin cytoskeleton);04510(Focal adhesion);04520(Adherens junction);04530(Tight junction);04611(Platelet activation);04670(Leukocyte transendothelial migration);04921(Oxytocin signaling pathway);04919(Thyroid hormone signaling pathway);05205(Proteoglycans in cancer);05410(Hypertrophic cardiomyopathy (…
circRNA3011	13.3545	15.1475	18.036	5.09043	2.64311	1.84422	15.5127	3.19259	up	2.28065	0.00266341	yes	chr15	22750457	22768247	+	6	circRNA	-	ENSSSCT00000017110	ACTR3	mRNA	chr15:22746767-22750456|chr15:22768247-22781241	ARP3 actin-related protein 3 homolog (yeast) [Source:HGNC Symbol;Acc:HGNC:170]	GO:0070062(extracellular exosome);GO:0030027(lamellipodium);GO:0016020(membrane);GO:0005925(focal adhesion);GO:0005911(cell-cell junction);GO:0005903(brush border);GO:0005885(Arp2/3 protein complex);GO:0060271(cilium assembly);GO:0051653(spindle localization);GO:0051321(meiotic cell cycle);GO:0034314(Arp2/3 complex-mediated actin nucleation);GO:0033206(meiotic cytokinesis);GO:0016344(meiotic chro…	NA
circRNA5751	11.1945	11.7268	15.3541	3.76533	2.19559	2.24252	12.7584	2.73448	up	2.22211	0.00887418	yes	chr15	22750457	22765227	+	5	circRNA	-	ENSSSCT00000017110	ACTR3	mRNA	chr15:22746767-22750456|chr15:22765227-22768073	ARP3 actin-related protein 3 homolog (yeast) [Source:HGNC Symbol;Acc:HGNC:170]	GO:0070062(extracellular exosome);GO:0030027(lamellipodium);GO:0016020(membrane);GO:0005925(focal adhesion);GO:0005911(cell-cell junction);GO:0005903(brush border);GO:0005885(Arp2/3 protein complex);GO:0060271(cilium assembly);GO:0051653(spindle localization);GO:0051321(meiotic cell cycle);GO:0034314(Arp2/3 complex-mediated actin nucleation);GO:0033206(meiotic cytokinesis);GO:0016344(meiotic chro…	NA
circRNA1098	5.46505	4.72316	5.5352	1.64947	1.46527	2.05927	5.24114	1.72467	up	1.60356	0.000712545	yes	chr15	71703524	71709108	-	2	circRNA	-	ENSSSCT00000017285	ACVR1	mRNA	chr15:71690350-71703523|chr15:71709108-71715507	activin A receptor type 1 [Source:HGNC Symbol;Acc:HGNC:171]	GO:0048179(activin receptor complex);GO:0045177(apical part of cell);GO:0016021(integral component of membrane);GO:0016020(membrane);GO:0005887(integral component of plasma membrane);GO:2001237(negative regulation of extrinsic apoptotic signaling pathway);GO:2000017(positive regulation of determination of dorsal identity);GO:1905007(positive regulation of epithelial to mesenchymal transition invo…	04350(TGF-beta signaling pathway);04060(Cytokine-cytokine receptor interaction);04550(Signaling pathways regulating pluripotency of stem cells)
circRNA5754	7.67273	6.1599	7.50504	2.03193	1.86716	2.20868	7.11256	2.03592	up	1.80469	0.00688479	yes	chr15	71703524	71727032	-	6	circRNA	-	ENSSSCT00000017285	ACVR1	mRNA	chr15:71690350-71703523|chr15:71727032-71745334	activin A receptor type 1 [Source:HGNC Symbol;Acc:HGNC:171]	GO:0048179(activin receptor complex);GO:0045177(apical part of cell);GO:0016021(integral component of membrane);GO:0016020(membrane);GO:0005887(integral component of plasma membrane);GO:2001237(negative regulation of extrinsic apoptotic signaling pathway);GO:2000017(positive regulation of determination of dorsal identity);GO:1905007(positive regulation of epithelial to mesenchymal transition invo…	04350(TGF-beta signaling pathway);04060(Cytokine-cytokine receptor interaction);04550(Signaling pathways regulating pluripotency of stem cells)
circRNA5755	2.80699	2.91655	2.48984	2.36581	0.819323	1.87343	2.73779	1.68619	up	0.699246	0.13924	no	chr15	71720780	71727032	-	3	circRNA	-	ENSSSCT00000017285	ACVR1	mRNA	chr15:71715654-71720779|chr15:71727032-71745334	activin A receptor type 1 [Source:HGNC Symbol;Acc:HGNC:171]	GO:0048179(activin receptor complex);GO:0045177(apical part of cell);GO:0016021(integral component of membrane);GO:0016020(membrane);GO:0005887(integral component of plasma membrane);GO:2001237(negative regulation of extrinsic apoptotic signaling pathway);GO:2000017(positive regulation of determination of dorsal identity);GO:1905007(positive regulation of epithelial to mesenchymal transition invo…	04350(TGF-beta signaling pathway);04060(Cytokine-cytokine receptor interaction);04550(Signaling pathways regulating pluripotency of stem cells)
circRNA6901	10.347	10.7543	12.8439	1.38375	1.36877	2.58627	11.315	1.7796	up	2.66862	0.00160673	yes	chr15	71690220	71709108	-	3	circRNA	-	ENSSSCT00000017285	ACVR1	mRNA	chr15:71682740-71690219|chr15:71709108-71715507	activin A receptor type 1 [Source:HGNC Symbol;Acc:HGNC:171]	GO:0048179(activin receptor complex);GO:0045177(apical part of cell);GO:0016021(integral component of membrane);GO:0016020(membrane);GO:0005887(integral component of plasma membrane);GO:2001237(negative regulation of extrinsic apoptotic signaling pathway);GO:2000017(positive regulation of determination of dorsal identity);GO:1905007(positive regulation of epithelial to mesenchymal transition invo…	04350(TGF-beta signaling pathway);04060(Cytokine-cytokine receptor interaction);04550(Signaling pathways regulating pluripotency of stem cells)
circRNA6902	1.94844	2.31933	1.93036	0	0	1.7594	2.06604	0.586466	up	1.81675	0.121872	no	chr15	71708833	71709108	-	1	circRNA	-	ENSSSCT00000017285	ACVR1	mRNA	chr15:71703721-71708832|chr15:71709108-71715507	activin A receptor type 1 [Source:HGNC Symbol;Acc:HGNC:171]	GO:0048179(activin receptor complex);GO:0045177(apical part of cell);GO:0016021(integral component of membrane);GO:0016020(membrane);GO:0005887(integral component of plasma membrane);GO:2001237(negative regulation of extrinsic apoptotic signaling pathway);GO:2000017(positive regulation of determination of dorsal identity);GO:1905007(positive regulation of epithelial to mesenchymal transition invo…	04350(TGF-beta signaling pathway);04060(Cytokine-cytokine receptor interaction);04550(Signaling pathways regulating pluripotency of stem cells)
circRNA6903	5.26982	4.62837	5.18148	2.57342	2.13064	1.89958	5.02656	2.20121	up	1.19127	0.000556478	yes	chr15	71715508	71727032	-	4	circRNA	-	ENSSSCT00000017285	ACVR1	mRNA	chr15:71709108-71715507|chr15:71727032-71745334	activin A receptor type 1 [Source:HGNC Symbol;Acc:HGNC:171]	GO:0048179(activin receptor complex);GO:0045177(apical part of cell);GO:0016021(integral component of membrane);GO:0016020(membrane);GO:0005887(integral component of plasma membrane);GO:2001237(negative regulation of extrinsic apoptotic signaling pathway);GO:2000017(positive regulation of determination of dorsal identity);GO:1905007(positive regulation of epithelial to mesenchymal transition invo…	04350(TGF-beta signaling pathway);04060(Cytokine-cytokine receptor interaction);04550(Signaling pathways regulating pluripotency of stem cells)
circRNA3868	10.9089	14.3634	13.6722	6.93808	11.1081	7.02119	12.9815	8.35579	up	0.635611	0.0599357	no	chr3	135116468	135118541	+	3	circRNA	-	ENSSSCT00000009453	ADAM17	mRNA	chr3:135115009-135116467|chr3:135118541-135119925	NA	GO:0016021(integral component of membrane);GO:0016020(membrane);GO:0006508(proteolysis);GO:0008237(metallopeptidase activity)	NA
circRNA4660	15.0781	7.38258	12.8982	0.72156	5.98785	4.46425	11.7863	3.72455	up	1.66197	0.0509501	no	chr3	135114875	135117428	+	3	circRNA	-	ENSSSCT00000009453	ADAM17	mRNA	chr3:135112599-135114874|chr3:135117428-135118452	NA	GO:0016021(integral component of membrane);GO:0016020(membrane);GO:0006508(proteolysis);GO:0008237(metallopeptidase activity)	NA
circRNA648	4.68645	7.6771	7.59518	1.18542	6.91146	5.23199	6.65291	4.44296	up	0.582464	0.337534	no	chr3	135116468	135117428	+	2	circRNA	-	ENSSSCT00000009453	ADAM17	mRNA	chr3:135115009-135116467|chr3:135117428-135118452	NA	GO:0016021(integral component of membrane);GO:0016020(membrane);GO:0006508(proteolysis);GO:0008237(metallopeptidase activity)	NA
circRNA3578	1.16142	0.647939	2.44755	0	1.65505	0.287902	1.41897	0.647649	up	1.13156	0.356032	no	chr16	47081487	47115880	-	4	circRNA	-	ENSSSCT00000018451	ADAMTS6	mRNA	chr16:47060055-47081486|chr16:47115880-47124322	ADAM metallopeptidase with thrombospondin type 1 motif 6 [Source:HGNC Symbol;Acc:HGNC:222]	GO:0031012(extracellular matrix);GO:0005578(proteinaceous extracellular matrix);GO:0060976(coronary vasculature development);GO:0035904(aorta development);GO:0007507(heart development);GO:0006508(proteolysis);GO:0003279(cardiac septum development);GO:0046872(metal ion binding);GO:0008270(zinc ion binding);GO:0008237(metallopeptidase activity);GO:0008233(peptidase activity);GO:0004222(metalloendop…	NA
circRNA3579	0	0	1.34033	4.24117	0	1.1772	0.446775	1.80612	down	-2.01528	0.398761	no	chr16	47180663	47186013	-	2	circRNA	-	ENSSSCT00000018451	ADAMTS6	mRNA	chr16:47124469-47180662|chr16:47186013-47267572	ADAM metallopeptidase with thrombospondin type 1 motif 6 [Source:HGNC Symbol;Acc:HGNC:222]	GO:0031012(extracellular matrix);GO:0005578(proteinaceous extracellular matrix);GO:0060976(coronary vasculature development);GO:0035904(aorta development);GO:0007507(heart development);GO:0006508(proteolysis);GO:0003279(cardiac septum development);GO:0046872(metal ion binding);GO:0008270(zinc ion binding);GO:0008237(metallopeptidase activity);GO:0008233(peptidase activity);GO:0004222(metalloendop…	NA
circRNA4232	1.11891	1.87513	0.417402	0	2.81919	0	1.13715	0.939731	up	0.275099	0.861134	no	chr16	47115739	47124469	-	2	circRNA	-	ENSSSCT00000018451	ADAMTS6	mRNA	chr16:47092770-47115738|chr16:47124469-47180662	ADAM metallopeptidase with thrombospondin type 1 motif 6 [Source:HGNC Symbol;Acc:HGNC:222]	GO:0031012(extracellular matrix);GO:0005578(proteinaceous extracellular matrix);GO:0060976(coronary vasculature development);GO:0035904(aorta development);GO:0007507(heart development);GO:0006508(proteolysis);GO:0003279(cardiac septum development);GO:0046872(metal ion binding);GO:0008270(zinc ion binding);GO:0008237(metallopeptidase activity);GO:0008233(peptidase activity);GO:0004222(metalloendop…	NA
circRNA6296	1.1581	1.1606	2.05355	0	1.62831	0.218179	1.45742	0.615495	up	1.24359	0.243493	no	chr16	47081487	47124469	-	5	circRNA	-	ENSSSCT00000018451	ADAMTS6	mRNA	chr16:47060055-47081486|chr16:47124469-47180662	ADAM metallopeptidase with thrombospondin type 1 motif 6 [Source:HGNC Symbol;Acc:HGNC:222]	GO:0031012(extracellular matrix);GO:0005578(proteinaceous extracellular matrix);GO:0060976(coronary vasculature development);GO:0035904(aorta development);GO:0007507(heart development);GO:0006508(proteolysis);GO:0003279(cardiac septum development);GO:0046872(metal ion binding);GO:0008270(zinc ion binding);GO:0008237(metallopeptidase activity);GO:0008233(peptidase activity);GO:0004222(metalloendop…	NA
circRNA1526	10.589	10.118	13.7426	2.33416	1.52163	3.60113	11.4832	2.48564	up	2.20783	0.00573035	yes	chr8	1266332	1270239	+	4	circRNA	-	ENSSSCT00000009510	ADD1	mRNA	chr8:1257008-1266331|chr8:1270239-1271103	adducin 1 [Source:HGNC Symbol;Acc:HGNC:243]	GO:0016604(nuclear body);GO:0016020(membrane);GO:0008290(F-actin capping protein complex);GO:0005925(focal adhesion);GO:0005886(plasma membrane);GO:0005856(cytoskeleton);GO:0005654(nucleoplasm);GO:0005634(nucleus);GO:0051017(actin filament bundle assembly);GO:0051016(barbed-end actin filament capping);GO:0048873(homeostasis of number of cells within a tissue);GO:0035264(multicellular organism gro…	NA
circRNA3414	9.12944	5.45432	11.3144	2.63427	3.1223	1.91103	8.63273	2.55587	up	1.756	0.0653946	no	chr8	1266332	1266763	+	2	circRNA	-	ENSSSCT00000009510	ADD1	mRNA	chr8:1257008-1266331|chr8:1266763-1269896	adducin 1 [Source:HGNC Symbol;Acc:HGNC:243]	GO:0016604(nuclear body);GO:0016020(membrane);GO:0008290(F-actin capping protein complex);GO:0005925(focal adhesion);GO:0005886(plasma membrane);GO:0005856(cytoskeleton);GO:0005654(nucleoplasm);GO:0005634(nucleus);GO:0051017(actin filament bundle assembly);GO:0051016(barbed-end actin filament capping);GO:0048873(homeostasis of number of cells within a tissue);GO:0035264(multicellular organism gro…	NA
circRNA4735	0	1.10273	0	1.07209	0	0	0.367577	0.357362	up	0.0406591	0.985058	no	chr1	55721559	55726653	+	2	circRNA	-	ENSSSCT00000004719	ADGRB3	mRNA	chr1:55718903-55721558|chr1:55726653-55739374	adhesion G protein-coupled receptor B3 [Source:HGNC Symbol;Acc:HGNC:945]	GO:0098794(postsynapse);GO:0043083(synaptic cleft);GO:0016021(integral component of membrane);GO:0016020(membrane);GO:0005886(plasma membrane);GO:0099558(maintenance of synapse structure);GO:0061743(motor learning);GO:0051965(positive regulation of synapse assembly);GO:0048814(regulation of dendrite morphogenesis);GO:0043547(positive regulation of GTPase activity);GO:0016525(negative regulation o…	NA
circRNA972	0.126281	1.82531	1.92622	4.47195	6.79822	0	1.2926	3.75672	down	-1.5392	0.342175	no	chr1	55626102	55631926	+	3	circRNA	-	ENSSSCT00000004719	ADGRB3	mRNA	chr1:55488818-55626101|chr1:55631926-55713264	adhesion G protein-coupled receptor B3 [Source:HGNC Symbol;Acc:HGNC:945]	GO:0098794(postsynapse);GO:0043083(synaptic cleft);GO:0016021(integral component of membrane);GO:0016020(membrane);GO:0005886(plasma membrane);GO:0099558(maintenance of synapse structure);GO:0061743(motor learning);GO:0051965(positive regulation of synapse assembly);GO:0048814(regulation of dendrite morphogenesis);GO:0043547(positive regulation of GTPase activity);GO:0016525(negative regulation o…	NA
circRNA1201	85.9908	90.8964	77.4064	2.21564	2.48493	1.90116	84.7645	2.20058	up	5.26751	0.0022367	yes	chr6	122037337	122107954	-	2	circRNA	-	ENSSSCT00000004163	ADGRL2	mRNA	chr6:122007755-122037336|None	adhesion G protein-coupled receptor L2 [Source:HGNC Symbol;Acc:HGNC:18582]	GO:0016021(integral component of membrane);GO:0016020(membrane);GO:0007186(G-protein coupled receptor signaling pathway);GO:0007166(cell surface receptor signaling pathway);GO:0007165(signal transduction);GO:0030246(carbohydrate binding);GO:0004930(G-protein coupled receptor activity);GO:0004888(transmembrane signaling receptor activity);GO:0004871(signal transducer activity)	NA
circRNA54	8.84801	18.407	13.296	0.49173	3.30054	0.653999	13.517	1.48209	up	3.18907	0.0380813	yes	chr6	122000800	122037550	-	3	circRNA	-	ENSSSCT00000004163	ADGRL2	mRNA	chr6:121994919-122000799|chr6:122037550-122107781	adhesion G protein-coupled receptor L2 [Source:HGNC Symbol;Acc:HGNC:18582]	GO:0016021(integral component of membrane);GO:0016020(membrane);GO:0007186(G-protein coupled receptor signaling pathway);GO:0007166(cell surface receptor signaling pathway);GO:0007165(signal transduction);GO:0030246(carbohydrate binding);GO:0004930(G-protein coupled receptor activity);GO:0004888(transmembrane signaling receptor activity);GO:0004871(signal transducer activity)	NA
circRNA1229	9.27367	9.00246	10.4781	0.180194	0.435065	3.11555	9.58475	1.2436	up	2.94622	0.00469053	yes	chr5	56918746	56928732	-	3	circRNA	-	ENSSSCT00000000632	AEBP2	mRNA	chr5:56916192-56918745|chr5:56928732-56933126	AE binding protein 2 [Source:HGNC Symbol;Acc:HGNC:24051]	GO:0035098(ESC/E(Z) complex);GO:0005634(nucleus);GO:0006355(regulation of transcription, DNA-templated);GO:0000122(negative regulation of transcription from RNA polymerase II promoter);GO:0046872(metal ion binding);GO:0003714(transcription corepressor activity);GO:0003677(DNA binding);GO:0003676(nucleic acid binding);GO:0001078(transcriptional repressor activity, RNA polymerase II core promoter p…	NA
circRNA3146	9.22197	13.7468	15.9022	6.68836	2.77695	2.34442	12.957	3.93658	up	1.71872	0.0242346	yes	chr5	56933127	56955103	-	2	circRNA	-	ENSSSCT00000000632	AEBP2	mRNA	chr5:56928732-56933126|chr5:56955103-56963933	AE binding protein 2 [Source:HGNC Symbol;Acc:HGNC:24051]	GO:0035098(ESC/E(Z) complex);GO:0005634(nucleus);GO:0006355(regulation of transcription, DNA-templated);GO:0000122(negative regulation of transcription from RNA polymerase II promoter);GO:0046872(metal ion binding);GO:0003714(transcription corepressor activity);GO:0003677(DNA binding);GO:0003676(nucleic acid binding);GO:0001078(transcriptional repressor activity, RNA polymerase II core promoter p…	NA
circRNA3780	10.3284	11.35	17.9351	5.09175	2.00713	3.22644	13.2045	3.44177	up	1.93981	0.0413257	yes	chr5	56920927	56955103	-	4	circRNA	-	ENSSSCT00000000632	AEBP2	mRNA	chr5:56918859-56920926|chr5:56955103-56963933	AE binding protein 2 [Source:HGNC Symbol;Acc:HGNC:24051]	GO:0035098(ESC/E(Z) complex);GO:0005634(nucleus);GO:0006355(regulation of transcription, DNA-templated);GO:0000122(negative regulation of transcription from RNA polymerase II promoter);GO:0046872(metal ion binding);GO:0003714(transcription corepressor activity);GO:0003677(DNA binding);GO:0003676(nucleic acid binding);GO:0001078(transcriptional repressor activity, RNA polymerase II core promoter p…	NA
circRNA6504	8.68666	11.1554	15.5733	5.91613	2.01408	2.62767	11.8051	3.51929	up	1.74606	0.0336336	yes	chr5	56928608	56955103	-	3	circRNA	-	ENSSSCT00000000632	AEBP2	mRNA	chr5:56920994-56928607|chr5:56955103-56963933	AE binding protein 2 [Source:HGNC Symbol;Acc:HGNC:24051]	GO:0035098(ESC/E(Z) complex);GO:0005634(nucleus);GO:0006355(regulation of transcription, DNA-templated);GO:0000122(negative regulation of transcription from RNA polymerase II promoter);GO:0046872(metal ion binding);GO:0003714(transcription corepressor activity);GO:0003677(DNA binding);GO:0003676(nucleic acid binding);GO:0001078(transcriptional repressor activity, RNA polymerase II core promoter p…	NA
circRNA4715	3.59944	0.533612	0.96785	16.7654	14.9055	11.3985	1.7003	14.3564	down	-3.07784	0.0046011	yes	chr1	2764696	2770778	-	4	circRNA	-	ENSSSCT00000004443	AFDN	mRNA	chr1:2761837-2764695|chr1:2770778-2775860	afadin, adherens junction formation factor [Source:HGNC Symbol;Acc:HGNC:7137]	GO:0045177(apical part of cell);GO:0043296(apical junction complex);GO:0030054(cell junction);GO:0016607(nuclear speck);GO:0005913(cell-cell adherens junction);GO:0005912(adherens junction);GO:0005911(cell-cell junction);GO:0005886(plasma membrane);GO:0005829(cytosol);GO:0005737(cytoplasm);GO:0005654(nucleoplasm);GO:1902414(protein localization to cell junction);GO:0070445(regulation of oligodend…	04014(Ras signaling pathway);04015(Rap1 signaling pathway);04024(cAMP signaling pathway);04520(Adherens junction);04530(Tight junction);04670(Leukocyte transendothelial migration)
circRNA4716	0.662135	0.446632	1.13623	5.1238	5.45164	4.06567	0.748331	4.88037	down	-2.70524	0.00343939	yes	chr1	2805468	2814551	-	4	circRNA	-	ENSSSCT00000004443	AFDN	mRNA	chr1:2790071-2805467|chr1:2814551-2815302	afadin, adherens junction formation factor [Source:HGNC Symbol;Acc:HGNC:7137]	GO:0045177(apical part of cell);GO:0043296(apical junction complex);GO:0030054(cell junction);GO:0016607(nuclear speck);GO:0005913(cell-cell adherens junction);GO:0005912(adherens junction);GO:0005911(cell-cell junction);GO:0005886(plasma membrane);GO:0005829(cytosol);GO:0005737(cytoplasm);GO:0005654(nucleoplasm);GO:1902414(protein localization to cell junction);GO:0070445(regulation of oligodend…	04014(Ras signaling pathway);04015(Rap1 signaling pathway);04024(cAMP signaling pathway);04520(Adherens junction);04530(Tight junction);04670(Leukocyte transendothelial migration)
circRNA1373	13.1241	13.7281	16.0321	10.2092	8.49543	7.55326	14.2948	8.75263	up	0.707697	0.00968166	no	chr2	140760854	140772947	-	5	circRNA	-	ENSSSCT00000025744	AFF4	mRNA	chr2:140696941-140760853|chr2:140772947-140803856	AF4/FMR2 family member 4 [Source:HGNC Symbol;Acc:HGNC:17869]	GO:0035327(transcriptionally active chromatin);GO:0008023(transcription elongation factor complex);GO:0005634(nucleus);GO:0001650(fibrillar center);GO:0007286(spermatid development)	NA
circRNA2129	8.34986	8.20345	8.93334	6.05142	7.35707	6.46718	8.49555	6.62522	up	0.358738	0.0215514	no	chr2	140767868	140772947	-	3	circRNA	-	ENSSSCT00000015614	AFF4	mRNA	chr2:140765893-140767867|chr2:140772947-140803856	AF4/FMR2 family member 4 [Source:HGNC Symbol;Acc:HGNC:17869]	GO:0035327(transcriptionally active chromatin);GO:0008023(transcription elongation factor complex);GO:0005634(nucleus);GO:0001650(fibrillar center);GO:0007286(spermatid development)	NA
circRNA2815	4.6446	8.58835	12.386	2.96355	5.1677	2.23352	8.53966	3.45492	up	1.30553	0.138106	no	chr2	140679126	140684178	-	2	circRNA	-	ENSSSCT00000015614	AFF4	mRNA	chr2:140676836-140679125|chr2:140684178-140684952	AF4/FMR2 family member 4 [Source:HGNC Symbol;Acc:HGNC:17869]	GO:0035327(transcriptionally active chromatin);GO:0008023(transcription elongation factor complex);GO:0005634(nucleus);GO:0001650(fibrillar center);GO:0007286(spermatid development)	NA
circRNA6021	11.6906	13.916	19.7224	21.4965	12.3403	10.6763	15.1097	14.8377	up	0.0262067	0.950959	no	chr2	140676197	140679220	-	4	circRNA	-	ENSSSCT00000015614	AFF4	mRNA	chr2:140674779-140676196|chr2:140679220-140683937	AF4/FMR2 family member 4 [Source:HGNC Symbol;Acc:HGNC:17869]	GO:0035327(transcriptionally active chromatin);GO:0008023(transcription elongation factor complex);GO:0005634(nucleus);GO:0001650(fibrillar center);GO:0007286(spermatid development)	NA
circRNA186	3.83436	1.60111	0.670163	0.71245	2.32727	1.31543	2.03521	1.45172	up	0.487419	0.617942	no	chr2	87512163	87517930	+	4	circRNA	-	ENSSSCT00000015395	AGGF1	mRNA	chr2:87507537-87512162|chr2:87517930-87533402	angiogenic factor with G-patch and FHA domains 1 [Source:HGNC Symbol;Acc:HGNC:24684]	GO:0048471(perinuclear region of cytoplasm);GO:0005737(cytoplasm);GO:0005576(extracellular region);GO:0045766(positive regulation of angiogenesis);GO:0007155(cell adhesion);GO:0001938(positive regulation of endothelial cell proliferation);GO:0001570(vasculogenesis);GO:0003676(nucleic acid binding)	NA
circRNA4693	1.791	1.72584	0.768339	0.998337	3.26114	1.84328	1.42839	2.03425	down	-0.510107	0.473045	no	chr2	87512163	87514471	+	3	circRNA	-	ENSSSCT00000015395	AGGF1	mRNA	chr2:87507537-87512162|chr2:87514471-87517741	angiogenic factor with G-patch and FHA domains 1 [Source:HGNC Symbol;Acc:HGNC:24684]	GO:0048471(perinuclear region of cytoplasm);GO:0005737(cytoplasm);GO:0005576(extracellular region);GO:0045766(positive regulation of angiogenesis);GO:0007155(cell adhesion);GO:0001938(positive regulation of endothelial cell proliferation);GO:0001570(vasculogenesis);GO:0003676(nucleic acid binding)	NA
circRNA2212	2.27222	3.14747	3.38466	5.02906	1.79886	0	2.93478	2.27597	up	0.366772	0.701503	no	chr18	8644624	8648674	-	6	circRNA	-	ENSSSCT00000017956	AGK	mRNA	chr18:8579636-8644623|chr18:8648674-8655701	acylglycerol kinase [Source:HGNC Symbol;Acc:HGNC:21869]	GO:0043231(intracellular membrane-bounded organelle);GO:0016020(membrane);GO:0005739(mitochondrion);GO:0046834(lipid phosphorylation);GO:0046513(ceramide biosynthetic process);GO:0016301(kinase activity);GO:0001729(ceramide kinase activity);GO:0001727(lipid kinase activity)	NA
circRNA6694	7.71549	5.78261	3.10563	8.99506	0.10859	8.61364	5.53458	5.90576	down	-0.0936507	0.915273	no	chr18	8570658	8571341	-	2	circRNA	-	ENSSSCT00000017956	AGK	mRNA	chr18:8561279-8570657|chr18:8571341-8575590	acylglycerol kinase [Source:HGNC Symbol;Acc:HGNC:21869]	GO:0043231(intracellular membrane-bounded organelle);GO:0016020(membrane);GO:0005739(mitochondrion);GO:0046834(lipid phosphorylation);GO:0046513(ceramide biosynthetic process);GO:0016301(kinase activity);GO:0001729(ceramide kinase activity);GO:0001727(lipid kinase activity)	NA
circRNA1191	2.28384	1.02995	0.757689	0.0808766	0.853405	0.401578	1.35716	0.445287	up	1.60779	0.182482	no	chr6	85269339	85279398	+	11	circRNA	-	ENSSSCT00000004025	AGO4	mRNA	chr6:85261964-85269338|chr6:85279398-85284145	argonaute 4, RISC catalytic component [Source:HGNC Symbol;Acc:HGNC:18424]	GO:0070578(RISC-loading complex);GO:0035068(micro-ribonucleoprotein complex);GO:0030529(intracellular ribonucleoprotein complex);GO:0016604(nuclear body);GO:0016442(RISC complex);GO:0016020(membrane);GO:0005829(cytosol);GO:0005737(cytoplasm);GO:0005654(nucleoplasm);GO:0005634(nucleus);GO:0000932(P-body);GO:0043066(negative regulation of apoptotic process);GO:0035280(miRNA loading onto RISC involv…	NA
circRNA4445	1.01879	0.353421	0.4662	0	1.13563	0.255912	0.612805	0.463846	up	0.401781	0.732885	no	chr6	85277738	85279398	+	2	circRNA	-	ENSSSCT00000004025	AGO4	mRNA	chr6:85276616-85277737|chr6:85279398-85284145	argonaute 4, RISC catalytic component [Source:HGNC Symbol;Acc:HGNC:18424]	GO:0070578(RISC-loading complex);GO:0035068(micro-ribonucleoprotein complex);GO:0030529(intracellular ribonucleoprotein complex);GO:0016604(nuclear body);GO:0016442(RISC complex);GO:0016020(membrane);GO:0005829(cytosol);GO:0005737(cytoplasm);GO:0005654(nucleoplasm);GO:0005634(nucleus);GO:0000932(P-body);GO:0043066(negative regulation of apoptotic process);GO:0035280(miRNA loading onto RISC involv…	NA
circRNA5851	11.5096	8.5208	9.90324	2.42472	3.80582	1.80638	9.97788	2.67898	up	1.89705	0.0034675	yes	chr6	85261799	85284732	+	14	circRNA	-	ENSSSCT00000004025	AGO4	mRNA	chr6:85255853-85261798|chr6:85284732-85292781	argonaute 4, RISC catalytic component [Source:HGNC Symbol;Acc:HGNC:18424]	GO:0070578(RISC-loading complex);GO:0035068(micro-ribonucleoprotein complex);GO:0030529(intracellular ribonucleoprotein complex);GO:0016604(nuclear body);GO:0016442(RISC complex);GO:0016020(membrane);GO:0005829(cytosol);GO:0005737(cytoplasm);GO:0005654(nucleoplasm);GO:0005634(nucleus);GO:0000932(P-body);GO:0043066(negative regulation of apoptotic process);GO:0035280(miRNA loading onto RISC involv…	NA
circRNA2563	2.77266	7.69149	7.92981	0	0	1.28976	6.13132	0.429919	up	3.83406	0.0689437	no	chr15	92686198	92712268	+	6	circRNA	-	ENSSSCT00000030764	AGPS	mRNA	chr15:92674794-92686197|chr15:92712268-92716453	alkylglycerone phosphate synthase [Source:HGNC Symbol;Acc:HGNC:327]	GO:0016020(membrane);GO:0005778(peroxisomal membrane);GO:0005777(peroxisome);GO:0005739(mitochondrion);GO:0005730(nucleolus);GO:0055114(oxidation-reduction process);GO:0008610(lipid biosynthetic process);GO:0006629(lipid metabolic process);GO:0050660(flavin adenine dinucleotide binding);GO:0016740(transferase activity);GO:0016614(oxidoreductase activity, acting on CH-OH group of donors);GO:001649…	00565(Ether lipid metabolism);04146(Peroxisome)
circRNA471	3.52659	1.44993	0.537923	5.92049	4.1097	1.37799	1.83815	3.80273	down	-1.04878	0.292946	no	chr15	92653934	92657618	+	4	circRNA	-	ENSSSCT00000030764	AGPS	mRNA	chr15:92643606-92653933|chr15:92657618-92662184	alkylglycerone phosphate synthase [Source:HGNC Symbol;Acc:HGNC:327]	GO:0016020(membrane);GO:0005778(peroxisomal membrane);GO:0005777(peroxisome);GO:0005739(mitochondrion);GO:0005730(nucleolus);GO:0055114(oxidation-reduction process);GO:0008610(lipid biosynthetic process);GO:0006629(lipid metabolic process);GO:0050660(flavin adenine dinucleotide binding);GO:0016740(transferase activity);GO:0016614(oxidoreductase activity, acting on CH-OH group of donors);GO:001649…	00565(Ether lipid metabolism);04146(Peroxisome)
circRNA2481	1.79134	2.66772	4.19175	3.73781	3.71301	4.20428	2.8836	3.88503	down	-0.430053	0.287518	no	chr10	17413837	17414423	+	2	circRNA	-	ENSSSCT00000011885	AHCTF1	mRNA	chr10:17413151-17413836|chr10:17414423-17417954	AT-hook containing transcription factor 1 [Source:HGNC Symbol;Acc:HGNC:24618]	GO:0070062(extracellular exosome);GO:0034399(nuclear periphery);GO:0031965(nuclear membrane);GO:0031080(nuclear pore outer ring);GO:0016363(nuclear matrix);GO:0005737(cytoplasm);GO:0005643(nuclear pore);GO:0005634(nucleus);GO:0000785(chromatin);GO:0000777(condensed chromosome kinetochore);GO:0051292(nuclear pore complex assembly);GO:0006355(regulation of transcription, DNA-templated);GO:0000910(c…	NA
circRNA418	1.26423	0.200808	0.595994	0.0728849	0.21117	0.814267	0.68701	0.366107	up	0.908065	0.455214	no	chr10	17387726	17389472	+	4	circRNA	-	ENSSSCT00000011885	AHCTF1	mRNA	chr10:17385212-17387725|chr10:17389472-17394856	AT-hook containing transcription factor 1 [Source:HGNC Symbol;Acc:HGNC:24618]	GO:0070062(extracellular exosome);GO:0034399(nuclear periphery);GO:0031965(nuclear membrane);GO:0031080(nuclear pore outer ring);GO:0016363(nuclear matrix);GO:0005737(cytoplasm);GO:0005643(nuclear pore);GO:0005634(nucleus);GO:0000785(chromatin);GO:0000777(condensed chromosome kinetochore);GO:0051292(nuclear pore complex assembly);GO:0006355(regulation of transcription, DNA-templated);GO:0000910(c…	NA
circRNA5166	5.86206	4.62383	4.02555	1.44225	2.94785	3.24767	4.83715	2.54593	up	0.925965	0.042148	no	chr10	17379819	17388132	+	6	circRNA	-	ENSSSCT00000011885	AHCTF1	mRNA	chr10:17375485-17379818|chr10:17388132-17388464	AT-hook containing transcription factor 1 [Source:HGNC Symbol;Acc:HGNC:24618]	GO:0070062(extracellular exosome);GO:0034399(nuclear periphery);GO:0031965(nuclear membrane);GO:0031080(nuclear pore outer ring);GO:0016363(nuclear matrix);GO:0005737(cytoplasm);GO:0005643(nuclear pore);GO:0005634(nucleus);GO:0000785(chromatin);GO:0000777(condensed chromosome kinetochore);GO:0051292(nuclear pore complex assembly);GO:0006355(regulation of transcription, DNA-templated);GO:0000910(c…	NA
circRNA6256	3.6939	3.40175	4.30192	1.5031	0.155534	1.4565	3.79919	1.03838	up	1.87136	0.0101073	yes	chr10	17387726	17396207	+	6	circRNA	-	ENSSSCT00000011885	AHCTF1	mRNA	chr10:17385212-17387725|chr10:17396207-17398441	AT-hook containing transcription factor 1 [Source:HGNC Symbol;Acc:HGNC:24618]	GO:0070062(extracellular exosome);GO:0034399(nuclear periphery);GO:0031965(nuclear membrane);GO:0031080(nuclear pore outer ring);GO:0016363(nuclear matrix);GO:0005737(cytoplasm);GO:0005643(nuclear pore);GO:0005634(nucleus);GO:0000785(chromatin);GO:0000777(condensed chromosome kinetochore);GO:0051292(nuclear pore complex assembly);GO:0006355(regulation of transcription, DNA-templated);GO:0000910(c…	NA
circRNA6257	2.61569	0.708898	1.09096	3.16265	2.74378	3.65022	1.47185	3.18555	down	-1.11391	0.0813121	no	chr10	17402178	17404240	+	5	circRNA	-	ENSSSCT00000011885	AHCTF1	mRNA	chr10:17400320-17402177|chr10:17404240-17411954	AT-hook containing transcription factor 1 [Source:HGNC Symbol;Acc:HGNC:24618]	GO:0070062(extracellular exosome);GO:0034399(nuclear periphery);GO:0031965(nuclear membrane);GO:0031080(nuclear pore outer ring);GO:0016363(nuclear matrix);GO:0005737(cytoplasm);GO:0005643(nuclear pore);GO:0005634(nucleus);GO:0000785(chromatin);GO:0000777(condensed chromosome kinetochore);GO:0051292(nuclear pore complex assembly);GO:0006355(regulation of transcription, DNA-templated);GO:0000910(c…	NA
circRNA797	9.40894	8.62892	5.19634	3.06386	2.21924	3.16938	7.74473	2.81749	up	1.45881	0.0559763	no	chr10	17379819	17381911	+	2	circRNA	-	ENSSSCT00000011885	AHCTF1	mRNA	chr10:17375485-17379818|chr10:17381911-17383654	AT-hook containing transcription factor 1 [Source:HGNC Symbol;Acc:HGNC:24618]	GO:0070062(extracellular exosome);GO:0034399(nuclear periphery);GO:0031965(nuclear membrane);GO:0031080(nuclear pore outer ring);GO:0016363(nuclear matrix);GO:0005737(cytoplasm);GO:0005643(nuclear pore);GO:0005634(nucleus);GO:0000785(chromatin);GO:0000777(condensed chromosome kinetochore);GO:0051292(nuclear pore complex assembly);GO:0006355(regulation of transcription, DNA-templated);GO:0000910(c…	NA
circRNA1390	2.07241	1.46213	3.9752	0.717946	1.01816	0.608433	2.50325	0.781513	up	1.67946	0.147459	no	chr1	32080657	32112092	+	12	circRNA	-	ENSSSCT00000004605	AHI1	mRNA	chr1:32072573-32080656|chr1:32112092-32124161	Abelson helper integration site 1 [Source:HGNC Symbol;Acc:HGNC:21575]	GO:0097730(non-motile cilium);GO:0036064(ciliary basal body);GO:0005929(cilium);GO:0005912(adherens junction);GO:0005911(cell-cell junction);GO:0005814(centriole);GO:0005813(centrosome);GO:0071599(otic vesicle development);GO:0070986(left/right axis specification);GO:0070121(Kupffer's vesicle development);GO:0065001(specification of axis polarity);GO:0060271(cilium assembly);GO:0050795(regulation…	NA
circRNA3284	1.35414	1.51165	1.7918	0	0.154654	0	1.55253	0.0515514	up	4.91246	0.00292545	yes	chr1	32082085	32089431	+	3	circRNA	-	ENSSSCT00000004605	AHI1	mRNA	chr1:32080876-32082084|chr1:32089431-32091198	Abelson helper integration site 1 [Source:HGNC Symbol;Acc:HGNC:21575]	GO:0097730(non-motile cilium);GO:0036064(ciliary basal body);GO:0005929(cilium);GO:0005912(adherens junction);GO:0005911(cell-cell junction);GO:0005814(centriole);GO:0005813(centrosome);GO:0071599(otic vesicle development);GO:0070986(left/right axis specification);GO:0070121(Kupffer's vesicle development);GO:0065001(specification of axis polarity);GO:0060271(cilium assembly);GO:0050795(regulation…	NA
circRNA4723	0.593862	0.825113	0.342323	0	0.581669	0.0770922	0.587099	0.219587	up	1.41881	0.189529	no	chr1	32080657	32085670	+	3	circRNA	-	ENSSSCT00000004605	AHI1	mRNA	chr1:32072573-32080656|chr1:32085670-32089245	Abelson helper integration site 1 [Source:HGNC Symbol;Acc:HGNC:21575]	GO:0097730(non-motile cilium);GO:0036064(ciliary basal body);GO:0005929(cilium);GO:0005912(adherens junction);GO:0005911(cell-cell junction);GO:0005814(centriole);GO:0005813(centrosome);GO:0071599(otic vesicle development);GO:0070986(left/right axis specification);GO:0070121(Kupffer's vesicle development);GO:0065001(specification of axis polarity);GO:0060271(cilium assembly);GO:0050795(regulation…	NA
circRNA4724	1.19929	1.26628	3.23904	0.913024	0.273813	0.610141	1.90154	0.598993	up	1.66656	0.184385	no	chr1	32080657	32104524	+	9	circRNA	-	ENSSSCT00000004605	AHI1	mRNA	chr1:32072573-32080656|chr1:32104524-32107746	Abelson helper integration site 1 [Source:HGNC Symbol;Acc:HGNC:21575]	GO:0097730(non-motile cilium);GO:0036064(ciliary basal body);GO:0005929(cilium);GO:0005912(adherens junction);GO:0005911(cell-cell junction);GO:0005814(centriole);GO:0005813(centrosome);GO:0071599(otic vesicle development);GO:0070986(left/right axis specification);GO:0070121(Kupffer's vesicle development);GO:0065001(specification of axis polarity);GO:0060271(cilium assembly);GO:0050795(regulation…	NA
circRNA4725	0.927735	0.988468	2.32256	0	0.0955401	0.0947315	1.41292	0.0634239	up	4.47751	0.0967095	no	chr1	32089246	32093129	+	3	circRNA	-	ENSSSCT00000004605	AHI1	mRNA	chr1:32085670-32089245|chr1:32093129-32097052	Abelson helper integration site 1 [Source:HGNC Symbol;Acc:HGNC:21575]	GO:0097730(non-motile cilium);GO:0036064(ciliary basal body);GO:0005929(cilium);GO:0005912(adherens junction);GO:0005911(cell-cell junction);GO:0005814(centriole);GO:0005813(centrosome);GO:0071599(otic vesicle development);GO:0070986(left/right axis specification);GO:0070121(Kupffer's vesicle development);GO:0065001(specification of axis polarity);GO:0060271(cilium assembly);GO:0050795(regulation…	NA
circRNA4726	0.225954	0	0.969342	0	0	0.15766	0.398432	0.0525535	up	2.92248	0.358717	no	chr1	32091199	32093129	+	2	circRNA	-	ENSSSCT00000004605	AHI1	mRNA	chr1:32089431-32091198|chr1:32093129-32097052	Abelson helper integration site 1 [Source:HGNC Symbol;Acc:HGNC:21575]	GO:0097730(non-motile cilium);GO:0036064(ciliary basal body);GO:0005929(cilium);GO:0005912(adherens junction);GO:0005911(cell-cell junction);GO:0005814(centriole);GO:0005813(centrosome);GO:0071599(otic vesicle development);GO:0070986(left/right axis specification);GO:0070121(Kupffer's vesicle development);GO:0065001(specification of axis polarity);GO:0060271(cilium assembly);GO:0050795(regulation…	NA
circRNA2622	2.35569	0.540472	2.8874	0	4.65347	1.87851	1.92785	2.17732	down	-0.175561	0.880523	no	chr14	78977382	78978036	-	2	circRNA	-	ENSSSCT00000011228	AIFM2	mRNA	chr14:78975069-78977381|chr14:78978036-78979667	apoptosis inducing factor, mitochondria associated 2 [Source:HGNC Symbol;Acc:HGNC:21411]	GO:0005829(cytosol);GO:0005811(lipid particle);GO:0005741(mitochondrial outer membrane);GO:0005739(mitochondrion);GO:0005737(cytoplasm);GO:0005615(extracellular space);GO:0055114(oxidation-reduction process);GO:0043065(positive regulation of apoptotic process);GO:0008637(apoptotic mitochondrial changes);GO:0050660(flavin adenine dinucleotide binding);GO:0016491(oxidoreductase activity);GO:0004174…	NA
circRNA3044	5.47348	2.7923	6.75278	2.32258	12.3879	8.64926	5.00619	7.78658	down	-0.637278	0.452332	no	chr14	78979668	78981100	-	2	circRNA	-	ENSSSCT00000011228	AIFM2	mRNA	chr14:78978036-78979667|chr14:78981100-78983652	apoptosis inducing factor, mitochondria associated 2 [Source:HGNC Symbol;Acc:HGNC:21411]	GO:0005829(cytosol);GO:0005811(lipid particle);GO:0005741(mitochondrial outer membrane);GO:0005739(mitochondrion);GO:0005737(cytoplasm);GO:0005615(extracellular space);GO:0055114(oxidation-reduction process);GO:0043065(positive regulation of apoptotic process);GO:0008637(apoptotic mitochondrial changes);GO:0050660(flavin adenine dinucleotide binding);GO:0016491(oxidoreductase activity);GO:0004174…	NA
circRNA1685	4.83064	2.44556	5.14307	0.165486	1.54114	0	4.13976	0.568874	up	2.86336	0.0324109	yes	chr10	18149844	18187909	+	4	circRNA	-	ENSSSCT00000011894	AKT3	mRNA	chr10:18146269-18149843|chr10:18187909-18199659	AKT serine/threonine kinase 3 [Source:HGNC Symbol;Acc:HGNC:393]	GO:0016310(phosphorylation);GO:0006468(protein phosphorylation);GO:0016740(transferase activity);GO:0016301(kinase activity);GO:0005524(ATP binding);GO:0004674(protein serine/threonine kinase activity);GO:0004672(protein kinase activity);GO:0000166(nucleotide binding);GO:0005622(intracellular);GO:0048873(homeostasis of number of cells within a tissue);GO:0048854(brain morphogenesis);GO:0045793(po…	04014(Ras signaling pathway);04015(Rap1 signaling pathway);04010(MAPK signaling pathway);04012(ErbB signaling pathway);04370(VEGF signaling pathway);04630(Jak-STAT signaling pathway);04668(TNF signaling pathway);04066(HIF-1 signaling pathway);04068(FoxO signaling pathway);04071(Sphingolipid signaling pathway);04024(cAMP signaling pathway);04022(cGMP - PKG signaling pathway);04151(PI3K-Akt signali…
circRNA2482	32.1217	40.4382	43.2898	2.84049	4.55898	7.01067	38.6166	4.80338	up	3.0071	0.00494909	yes	chr10	17976426	18124093	+	3	circRNA	-	ENSSSCT00000011894	AKT3	mRNA	chr10:17966144-17976425|chr10:18124093-18140265	AKT serine/threonine kinase 3 [Source:HGNC Symbol;Acc:HGNC:393]	GO:0016310(phosphorylation);GO:0006468(protein phosphorylation);GO:0016740(transferase activity);GO:0016301(kinase activity);GO:0005524(ATP binding);GO:0004674(protein serine/threonine kinase activity);GO:0004672(protein kinase activity);GO:0000166(nucleotide binding);GO:0005622(intracellular);GO:0048873(homeostasis of number of cells within a tissue);GO:0048854(brain morphogenesis);GO:0045793(po…	04014(Ras signaling pathway);04015(Rap1 signaling pathway);04010(MAPK signaling pathway);04012(ErbB signaling pathway);04370(VEGF signaling pathway);04630(Jak-STAT signaling pathway);04668(TNF signaling pathway);04066(HIF-1 signaling pathway);04068(FoxO signaling pathway);04071(Sphingolipid signaling pathway);04024(cAMP signaling pathway);04022(cGMP - PKG signaling pathway);04151(PI3K-Akt signali…
circRNA2483	4.38901	3.76057	4.78354	0.0831695	0.843388	0.790108	4.31104	0.572222	up	2.91339	0.000756725	yes	chr10	18101700	18187909	+	8	circRNA	-	ENSSSCT00000011894	AKT3	mRNA	chr10:17976583-18101699|chr10:18187909-18199659	AKT serine/threonine kinase 3 [Source:HGNC Symbol;Acc:HGNC:393]	GO:0016310(phosphorylation);GO:0006468(protein phosphorylation);GO:0016740(transferase activity);GO:0016301(kinase activity);GO:0005524(ATP binding);GO:0004674(protein serine/threonine kinase activity);GO:0004672(protein kinase activity);GO:0000166(nucleotide binding);GO:0005622(intracellular);GO:0048873(homeostasis of number of cells within a tissue);GO:0048854(brain morphogenesis);GO:0045793(po…	04014(Ras signaling pathway);04015(Rap1 signaling pathway);04010(MAPK signaling pathway);04012(ErbB signaling pathway);04370(VEGF signaling pathway);04630(Jak-STAT signaling pathway);04668(TNF signaling pathway);04066(HIF-1 signaling pathway);04068(FoxO signaling pathway);04071(Sphingolipid signaling pathway);04024(cAMP signaling pathway);04022(cGMP - PKG signaling pathway);04151(PI3K-Akt signali…
circRNA2974	0.806907	1.50239	2.17998	0	0	0	1.49643	0	up	Inf	0.06355	no	chr10	18123982	18140410	+	2	circRNA	-	ENSSSCT00000011894	AKT3	mRNA	chr10:18101825-18123981|chr10:18140410-18146266	AKT serine/threonine kinase 3 [Source:HGNC Symbol;Acc:HGNC:393]	GO:0016310(phosphorylation);GO:0006468(protein phosphorylation);GO:0016740(transferase activity);GO:0016301(kinase activity);GO:0005524(ATP binding);GO:0004674(protein serine/threonine kinase activity);GO:0004672(protein kinase activity);GO:0000166(nucleotide binding);GO:0005622(intracellular);GO:0048873(homeostasis of number of cells within a tissue);GO:0048854(brain morphogenesis);GO:0045793(po…	04014(Ras signaling pathway);04015(Rap1 signaling pathway);04010(MAPK signaling pathway);04012(ErbB signaling pathway);04370(VEGF signaling pathway);04630(Jak-STAT signaling pathway);04668(TNF signaling pathway);04066(HIF-1 signaling pathway);04068(FoxO signaling pathway);04071(Sphingolipid signaling pathway);04024(cAMP signaling pathway);04022(cGMP - PKG signaling pathway);04151(PI3K-Akt signali…
circRNA3538	1.8664	2.43651	4.26774	0.250153	0	0	2.85688	0.0833844	up	5.09852	0.0601546	no	chr10	18167052	18187909	+	3	circRNA	-	ENSSSCT00000011894	AKT3	mRNA	chr10:18149975-18167051|chr10:18187909-18199659	AKT serine/threonine kinase 3 [Source:HGNC Symbol;Acc:HGNC:393]	GO:0016310(phosphorylation);GO:0006468(protein phosphorylation);GO:0016740(transferase activity);GO:0016301(kinase activity);GO:0005524(ATP binding);GO:0004674(protein serine/threonine kinase activity);GO:0004672(protein kinase activity);GO:0000166(nucleotide binding);GO:0005622(intracellular);GO:0048873(homeostasis of number of cells within a tissue);GO:0048854(brain morphogenesis);GO:0045793(po…	04014(Ras signaling pathway);04015(Rap1 signaling pathway);04010(MAPK signaling pathway);04012(ErbB signaling pathway);04370(VEGF signaling pathway);04630(Jak-STAT signaling pathway);04668(TNF signaling pathway);04066(HIF-1 signaling pathway);04068(FoxO signaling pathway);04071(Sphingolipid signaling pathway);04024(cAMP signaling pathway);04022(cGMP - PKG signaling pathway);04151(PI3K-Akt signali…
circRNA4178	41.4231	52.9749	58.0965	3.96068	6.26282	8.70463	50.8315	6.30938	up	3.01015	0.00821359	yes	chr10	17976426	18101825	+	2	circRNA	-	ENSSSCT00000011894	AKT3	mRNA	chr10:17966144-17976425|chr10:18101825-18123981	AKT serine/threonine kinase 3 [Source:HGNC Symbol;Acc:HGNC:393]	GO:0016310(phosphorylation);GO:0006468(protein phosphorylation);GO:0016740(transferase activity);GO:0016301(kinase activity);GO:0005524(ATP binding);GO:0004674(protein serine/threonine kinase activity);GO:0004672(protein kinase activity);GO:0000166(nucleotide binding);GO:0005622(intracellular);GO:0048873(homeostasis of number of cells within a tissue);GO:0048854(brain morphogenesis);GO:0045793(po…	04014(Ras signaling pathway);04015(Rap1 signaling pathway);04010(MAPK signaling pathway);04012(ErbB signaling pathway);04370(VEGF signaling pathway);04630(Jak-STAT signaling pathway);04668(TNF signaling pathway);04066(HIF-1 signaling pathway);04068(FoxO signaling pathway);04071(Sphingolipid signaling pathway);04024(cAMP signaling pathway);04022(cGMP - PKG signaling pathway);04151(PI3K-Akt signali…
circRNA4179	19.5136	25.1316	26.9463	1.66395	2.67064	4.56396	23.8638	2.96619	up	3.00814	0.00564858	yes	chr10	17976426	18149975	+	6	circRNA	-	ENSSSCT00000011894	AKT3	mRNA	chr10:17966144-17976425|chr10:18149975-18167051	AKT serine/threonine kinase 3 [Source:HGNC Symbol;Acc:HGNC:393]	GO:0016310(phosphorylation);GO:0006468(protein phosphorylation);GO:0016740(transferase activity);GO:0016301(kinase activity);GO:0005524(ATP binding);GO:0004674(protein serine/threonine kinase activity);GO:0004672(protein kinase activity);GO:0000166(nucleotide binding);GO:0005622(intracellular);GO:0048873(homeostasis of number of cells within a tissue);GO:0048854(brain morphogenesis);GO:0045793(po…	04014(Ras signaling pathway);04015(Rap1 signaling pathway);04010(MAPK signaling pathway);04012(ErbB signaling pathway);04370(VEGF signaling pathway);04630(Jak-STAT signaling pathway);04668(TNF signaling pathway);04066(HIF-1 signaling pathway);04068(FoxO signaling pathway);04071(Sphingolipid signaling pathway);04024(cAMP signaling pathway);04022(cGMP - PKG signaling pathway);04151(PI3K-Akt signali…
circRNA4180	3.16109	4.75479	4.84756	3.96832	1.21076	1.00831	4.25448	2.06246	up	1.04461	0.13505	no	chr10	18187787	18211136	+	3	circRNA	-	ENSSSCT00000011894	AKT3	mRNA	chr10:18168555-18187786|chr10:18211136-18219669	AKT serine/threonine kinase 3 [Source:HGNC Symbol;Acc:HGNC:393]	GO:0016310(phosphorylation);GO:0006468(protein phosphorylation);GO:0016740(transferase activity);GO:0016301(kinase activity);GO:0005524(ATP binding);GO:0004674(protein serine/threonine kinase activity);GO:0004672(protein kinase activity);GO:0000166(nucleotide binding);GO:0005622(intracellular);GO:0048873(homeostasis of number of cells within a tissue);GO:0048854(brain morphogenesis);GO:0045793(po…	04014(Ras signaling pathway);04015(Rap1 signaling pathway);04010(MAPK signaling pathway);04012(ErbB signaling pathway);04370(VEGF signaling pathway);04630(Jak-STAT signaling pathway);04668(TNF signaling pathway);04066(HIF-1 signaling pathway);04068(FoxO signaling pathway);04071(Sphingolipid signaling pathway);04024(cAMP signaling pathway);04022(cGMP - PKG signaling pathway);04151(PI3K-Akt signali…
circRNA4181	3.19185	4.58673	4.18761	3.38895	1.01878	1.3787	3.98873	1.92881	up	1.04822	0.0888561	no	chr10	18187787	18219757	+	4	circRNA	-	ENSSSCT00000011894	AKT3	mRNA	chr10:18168555-18187786|chr10:18219757-18250053	AKT serine/threonine kinase 3 [Source:HGNC Symbol;Acc:HGNC:393]	GO:0016310(phosphorylation);GO:0006468(protein phosphorylation);GO:0016740(transferase activity);GO:0016301(kinase activity);GO:0005524(ATP binding);GO:0004674(protein serine/threonine kinase activity);GO:0004672(protein kinase activity);GO:0000166(nucleotide binding);GO:0005622(intracellular);GO:0048873(homeostasis of number of cells within a tissue);GO:0048854(brain morphogenesis);GO:0045793(po…	04014(Ras signaling pathway);04015(Rap1 signaling pathway);04010(MAPK signaling pathway);04012(ErbB signaling pathway);04370(VEGF signaling pathway);04630(Jak-STAT signaling pathway);04668(TNF signaling pathway);04066(HIF-1 signaling pathway);04068(FoxO signaling pathway);04071(Sphingolipid signaling pathway);04024(cAMP signaling pathway);04022(cGMP - PKG signaling pathway);04151(PI3K-Akt signali…
circRNA5169	11.4275	22.0569	17.7775	1.77132	5.5707	3.26194	17.0873	3.53465	up	2.27329	0.0361549	yes	chr10	18210922	18250156	+	3	circRNA	-	ENSSSCT00000011894	AKT3	mRNA	chr10:18199788-18210921|chr10:18250156-18263365	AKT serine/threonine kinase 3 [Source:HGNC Symbol;Acc:HGNC:393]	GO:0016310(phosphorylation);GO:0006468(protein phosphorylation);GO:0016740(transferase activity);GO:0016301(kinase activity);GO:0005524(ATP binding);GO:0004674(protein serine/threonine kinase activity);GO:0004672(protein kinase activity);GO:0000166(nucleotide binding);GO:0005622(intracellular);GO:0048873(homeostasis of number of cells within a tissue);GO:0048854(brain morphogenesis);GO:0045793(po…	04014(Ras signaling pathway);04015(Rap1 signaling pathway);04010(MAPK signaling pathway);04012(ErbB signaling pathway);04370(VEGF signaling pathway);04630(Jak-STAT signaling pathway);04668(TNF signaling pathway);04066(HIF-1 signaling pathway);04068(FoxO signaling pathway);04071(Sphingolipid signaling pathway);04024(cAMP signaling pathway);04022(cGMP - PKG signaling pathway);04151(PI3K-Akt signali…
circRNA1371	3.40832	0.82108	4.36621	0	9.72507	2.15522	2.8652	3.9601	down	-0.466898	0.753987	no	chr2	134977667	134983095	+	4	circRNA	-	ENSSSCT00000015567	ALDH7A1	mRNA	chr2:134976564-134977666|chr2:134983095-134985175	aldehyde dehydrogenase 7 family member A1 [Source:HGNC Symbol;Acc:HGNC:877]	GO:0070062(extracellular exosome);GO:0005829(cytosol);GO:0005739(mitochondrion);GO:0055114(oxidation-reduction process);GO:0008152(metabolic process);GO:0016620(oxidoreductase activity, acting on the aldehyde or oxo group of donors, NAD or NADP as acceptor);GO:0016491(oxidoreductase activity)	NA
circRNA6019	7.70742	7.97378	5.90524	5.33351	12.7077	4.52007	7.19548	7.52041	down	-0.0637205	0.913613	no	chr2	134971674	134981326	+	5	circRNA	-	ENSSSCT00000015567	ALDH7A1	mRNA	chr2:134963981-134971673|chr2:134981326-134982682	aldehyde dehydrogenase 7 family member A1 [Source:HGNC Symbol;Acc:HGNC:877]	GO:0070062(extracellular exosome);GO:0005829(cytosol);GO:0005739(mitochondrion);GO:0055114(oxidation-reduction process);GO:0008152(metabolic process);GO:0016620(oxidoreductase activity, acting on the aldehyde or oxo group of donors, NAD or NADP as acceptor);GO:0016491(oxidoreductase activity)	NA
circRNA961	13.7931	12.8807	21.6787	7.47374	2.13614	0.854657	16.1175	3.48818	up	2.20808	0.0253002	yes	chr2	134956480	134971715	+	5	circRNA	-	ENSSSCT00000015567	ALDH7A1	mRNA	chr2:134953701-134956479|chr2:134971715-134974189	aldehyde dehydrogenase 7 family member A1 [Source:HGNC Symbol;Acc:HGNC:877]	GO:0070062(extracellular exosome);GO:0005829(cytosol);GO:0005739(mitochondrion);GO:0055114(oxidation-reduction process);GO:0008152(metabolic process);GO:0016620(oxidoreductase activity, acting on the aldehyde or oxo group of donors, NAD or NADP as acceptor);GO:0016491(oxidoreductase activity)	NA
circRNA3813	5.92738	4.20864	6.48353	2.6596	3.79357	5.79021	5.53985	4.08112	up	0.440881	0.275966	no	chr4	92697419	92698425	+	2	circRNA	-	ENSSSCT00000006932	ALDH9A1	mRNA	chr4:92695966-92697418|chr4:92698425-92705519	aldehyde dehydrogenase 9 family member A1 [Source:HGNC Symbol;Acc:HGNC:412]	GO:0070062(extracellular exosome);GO:0055114(oxidation-reduction process);GO:0042136(neurotransmitter biosynthetic process);GO:0008152(metabolic process);GO:0006081(cellular aldehyde metabolic process);GO:0019145(aminobutyraldehyde dehydrogenase activity);GO:0016620(oxidoreductase activity, acting on the aldehyde or oxo group of donors, NAD or NADP as acceptor);GO:0016491(oxidoreductase activity)…	00010(Glycolysis / Gluconeogenesis);00053(Ascorbate and aldarate metabolism);00620(Pyruvate metabolism);00071(Fatty acid degradation);00561(Glycerolipid metabolism);00280(Valine, leucine and isoleucine degradation);00310(Lysine degradation);00330(Arginine and proline metabolism);00340(Histidine metabolism);00380(Tryptophan metabolism);00410(beta-Alanine metabolism)
circRNA5930	8.64801	5.45812	6.12307	14.2942	14.2854	6.3165	6.74306	11.632	down	-0.786627	0.199413	no	chr4	92688332	92695966	+	3	circRNA	-	ENSSSCT00000006932	ALDH9A1	mRNA	chr4:92686338-92688331|chr4:92695966-92697418	aldehyde dehydrogenase 9 family member A1 [Source:HGNC Symbol;Acc:HGNC:412]	GO:0070062(extracellular exosome);GO:0055114(oxidation-reduction process);GO:0042136(neurotransmitter biosynthetic process);GO:0008152(metabolic process);GO:0006081(cellular aldehyde metabolic process);GO:0019145(aminobutyraldehyde dehydrogenase activity);GO:0016620(oxidoreductase activity, acting on the aldehyde or oxo group of donors, NAD or NADP as acceptor);GO:0016491(oxidoreductase activity)…	00010(Glycolysis / Gluconeogenesis);00053(Ascorbate and aldarate metabolism);00620(Pyruvate metabolism);00071(Fatty acid degradation);00561(Glycerolipid metabolism);00280(Valine, leucine and isoleucine degradation);00310(Lysine degradation);00330(Arginine and proline metabolism);00340(Histidine metabolism);00380(Tryptophan metabolism);00410(beta-Alanine metabolism)
circRNA1930	2.17862	2.51922	1.82772	0.971522	0	0.364834	2.17519	0.445452	up	2.2878	0.00993421	yes	chr6	137394338	137399634	-	3	circRNA	-	ENSSSCT00000004222	ALG6	mRNA	chr6:137387459-137394337|chr6:137399634-137402708	ALG6, alpha-1,3-glucosyltransferase [Source:HGNC Symbol;Acc:HGNC:23157]	GO:0016021(integral component of membrane);GO:0016020(membrane);GO:0005789(endoplasmic reticulum membrane);GO:0005783(endoplasmic reticulum);GO:0006490(oligosaccharide-lipid intermediate biosynthetic process);GO:0006487(protein N-linked glycosylation);GO:0046527(glucosyltransferase activity);GO:0042281(dolichyl pyrophosphate Man9GlcNAc2 alpha-1,3-glucosyltransferase activity);GO:0016758(transfera…	00510(N-Glycan biosynthesis)
circRNA5467	4.63065	4.73099	5.957	3.36601	4.24016	1.55714	5.10621	3.05444	up	0.741347	0.104275	no	chr6	137394338	137402844	-	4	circRNA	-	ENSSSCT00000004222	ALG6	mRNA	chr6:137387459-137394337|chr6:137402844-137403428	ALG6, alpha-1,3-glucosyltransferase [Source:HGNC Symbol;Acc:HGNC:23157]	GO:0016021(integral component of membrane);GO:0016020(membrane);GO:0005789(endoplasmic reticulum membrane);GO:0005783(endoplasmic reticulum);GO:0006490(oligosaccharide-lipid intermediate biosynthetic process);GO:0006487(protein N-linked glycosylation);GO:0046527(glucosyltransferase activity);GO:0042281(dolichyl pyrophosphate Man9GlcNAc2 alpha-1,3-glucosyltransferase activity);GO:0016758(transfera…	00510(N-Glycan biosynthesis)
circRNA55	3.70439	2.44237	2.60217	1.59822	1.23481	0.544159	2.91631	1.12573	up	1.37328	0.0259735	yes	chr6	137402709	137408448	-	6	circRNA	-	ENSSSCT00000004222	ALG6	mRNA	chr6:137399634-137402708|chr6:137408448-137415443	ALG6, alpha-1,3-glucosyltransferase [Source:HGNC Symbol;Acc:HGNC:23157]	GO:0016021(integral component of membrane);GO:0016020(membrane);GO:0005789(endoplasmic reticulum membrane);GO:0005783(endoplasmic reticulum);GO:0006490(oligosaccharide-lipid intermediate biosynthetic process);GO:0006487(protein N-linked glycosylation);GO:0046527(glucosyltransferase activity);GO:0042281(dolichyl pyrophosphate Man9GlcNAc2 alpha-1,3-glucosyltransferase activity);GO:0016758(transfera…	00510(N-Glycan biosynthesis)
circRNA4014	0.0563877	0	0.268782	0	0.857102	0.354103	0.10839	0.403735	down	-1.89718	0.358296	no	chr9	40158213	40161378	-	2	circRNA	-	ENSSSCT00000031597	ALKBH8	mRNA	chr9:40154700-40158212|chr9:40161378-40167433	alkB homolog 8, tRNA methyltransferase [Source:HGNC Symbol;Acc:HGNC:25189]	GO:0016604(nuclear body);GO:0005829(cytosol);GO:0005737(cytoplasm);GO:0005654(nucleoplasm);GO:0005634(nucleus);GO:0055114(oxidation-reduction process);GO:0030488(tRNA methylation);GO:0008152(metabolic process);GO:0006974(cellular response to DNA damage stimulus);GO:0002098(tRNA wobble uridine modification);GO:0016706(oxidoreductase activity, acting on paired donors, with incorporation or reductio…	NA
circRNA6708	2.69272	6.8428	3.24858	0	1.50921	1.18052	4.26137	0.896578	up	2.24882	0.11002	no	chr9	40142608	40161378	-	7	circRNA	-	ENSSSCT00000031597	ALKBH8	mRNA	chr9:40137029-40142607|chr9:40161378-40167433	alkB homolog 8, tRNA methyltransferase [Source:HGNC Symbol;Acc:HGNC:25189]	GO:0016604(nuclear body);GO:0005829(cytosol);GO:0005737(cytoplasm);GO:0005654(nucleoplasm);GO:0005634(nucleus);GO:0055114(oxidation-reduction process);GO:0030488(tRNA methylation);GO:0008152(metabolic process);GO:0006974(cellular response to DNA damage stimulus);GO:0002098(tRNA wobble uridine modification);GO:0016706(oxidoreductase activity, acting on paired donors, with incorporation or reductio…	NA
circRNA1429	0.720871	0.417694	0.134751	0	0	0	0.424439	0	up	Inf	0.128936	no	chr1	179860561	179872551	+	5	circRNA	-	ENSSSCT00000005427	ALPK2	mRNA	chr1:179856151-179860560|chr1:179872551-179877617	alpha kinase 2 [Source:HGNC Symbol;Acc:HGNC:20565]	GO:0005737(cytoplasm);GO:0006468(protein phosphorylation);GO:0005524(ATP binding);GO:0004674(protein serine/threonine kinase activity)	NA
circRNA1430	0.532062	0	0	0	0	0	0.177354	0	up	Inf	0.42265	no	chr1	179872334	179872551	+	1	circRNA	-	ENSSSCT00000005427	ALPK2	mRNA	chr1:179865984-179872333|chr1:179872551-179877617	alpha kinase 2 [Source:HGNC Symbol;Acc:HGNC:20565]	GO:0005737(cytoplasm);GO:0006468(protein phosphorylation);GO:0005524(ATP binding);GO:0004674(protein serine/threonine kinase activity)	NA
circRNA3312	0.559178	0.282246	0.190387	0	0	0	0.343937	0	up	Inf	0.0900479	no	chr1	179860561	179865984	+	4	circRNA	-	ENSSSCT00000005427	ALPK2	mRNA	chr1:179856151-179860560|chr1:179865984-179872333	alpha kinase 2 [Source:HGNC Symbol;Acc:HGNC:20565]	GO:0005737(cytoplasm);GO:0006468(protein phosphorylation);GO:0005524(ATP binding);GO:0004674(protein serine/threonine kinase activity)	NA
circRNA3313	0	0	0.276166	0	0	0	0.0920553	0	up	Inf	0.42265	no	chr1	179864221	179865984	+	2	circRNA	-	ENSSSCT00000005427	ALPK2	mRNA	chr1:179860824-179864220|chr1:179865984-179872333	alpha kinase 2 [Source:HGNC Symbol;Acc:HGNC:20565]	GO:0005737(cytoplasm);GO:0006468(protein phosphorylation);GO:0005524(ATP binding);GO:0004674(protein serine/threonine kinase activity)	NA
circRNA3951	0.978964	0.348546	0.112443	0	0	0	0.479984	0	up	Inf	0.204615	no	chr1	179856004	179872551	+	6	circRNA	-	ENSSSCT00000005427	ALPK2	mRNA	chr1:179853496-179856003|chr1:179872551-179877617	alpha kinase 2 [Source:HGNC Symbol;Acc:HGNC:20565]	GO:0005737(cytoplasm);GO:0006468(protein phosphorylation);GO:0005524(ATP binding);GO:0004674(protein serine/threonine kinase activity)	NA
circRNA4783	1.08149	0	0	0	0	0	0.360496	0	up	Inf	0.42265	no	chr1	179856004	179860824	+	3	circRNA	-	ENSSSCT00000005427	ALPK2	mRNA	chr1:179853496-179856003|chr1:179860824-179864220	alpha kinase 2 [Source:HGNC Symbol;Acc:HGNC:20565]	GO:0005737(cytoplasm);GO:0006468(protein phosphorylation);GO:0005524(ATP binding);GO:0004674(protein serine/threonine kinase activity)	NA
circRNA4784	2.48803	2.58779	0.752992	0	0	0	1.94294	0	up	Inf	0.0825242	no	chr1	179872334	179877666	+	2	circRNA	-	ENSSSCT00000005427	ALPK2	mRNA	chr1:179865984-179872333|chr1:179877666-179891085	alpha kinase 2 [Source:HGNC Symbol;Acc:HGNC:20565]	GO:0005737(cytoplasm);GO:0006468(protein phosphorylation);GO:0005524(ATP binding);GO:0004674(protein serine/threonine kinase activity)	NA
circRNA1335	4.1351	1.9354	2.98476	9.95598	4.15286	3.33869	3.01842	5.81585	down	-0.946196	0.310245	no	chr2	17315584	17316714	+	2	circRNA	-	ENSSSCT00000014486	AMBRA1	mRNA	chr2:17314860-17315583|chr2:17316714-17318156	autophagy and beclin 1 regulator 1 [Source:HGNC Symbol;Acc:HGNC:25990]	GO:0045335(phagocytic vesicle);GO:0043231(intracellular membrane-bounded organelle);GO:0005930(axoneme);GO:0005829(cytosol);GO:0005739(mitochondrion);GO:0005737(cytoplasm);GO:2000785(regulation of autophagosome assembly);GO:1903599(positive regulation of mitophagy);GO:0098779(positive regulation of macromitophagy in response to mitochondrial depolarization);GO:0043552(positive regulation of phosp…	NA
circRNA1336	11.8508	17.6874	15.4497	3.52371	3.89778	1.06181	14.996	2.82777	up	2.40684	0.00778327	yes	chr2	17353231	17366493	+	2	circRNA	-	ENSSSCT00000014486	AMBRA1	mRNA	chr2:17349071-17353230|chr2:17366493-17367427	autophagy and beclin 1 regulator 1 [Source:HGNC Symbol;Acc:HGNC:25990]	GO:0045335(phagocytic vesicle);GO:0043231(intracellular membrane-bounded organelle);GO:0005930(axoneme);GO:0005829(cytosol);GO:0005739(mitochondrion);GO:0005737(cytoplasm);GO:2000785(regulation of autophagosome assembly);GO:1903599(positive regulation of mitophagy);GO:0098779(positive regulation of macromitophagy in response to mitochondrial depolarization);GO:0043552(positive regulation of phosp…	NA
circRNA2086	9.08808	13.6882	12.361	3.66123	3.74499	1.00945	11.7124	2.80522	up	2.06185	0.00833417	yes	chr2	17353231	17367528	+	3	circRNA	-	ENSSSCT00000014486	AMBRA1	mRNA	chr2:17349071-17353230|chr2:17367528-17421151	autophagy and beclin 1 regulator 1 [Source:HGNC Symbol;Acc:HGNC:25990]	GO:0045335(phagocytic vesicle);GO:0043231(intracellular membrane-bounded organelle);GO:0005930(axoneme);GO:0005829(cytosol);GO:0005739(mitochondrion);GO:0005737(cytoplasm);GO:2000785(regulation of autophagosome assembly);GO:1903599(positive regulation of mitophagy);GO:0098779(positive regulation of macromitophagy in response to mitochondrial depolarization);GO:0043552(positive regulation of phosp…	NA
circRNA2087	1.77673	2.81006	2.81689	7.13025	4.17085	0.929792	2.46789	4.07697	down	-0.724216	0.465049	no	chr2	17366413	17367528	+	2	circRNA	-	ENSSSCT00000014486	AMBRA1	mRNA	chr2:17353410-17366412|chr2:17367528-17421151	autophagy and beclin 1 regulator 1 [Source:HGNC Symbol;Acc:HGNC:25990]	GO:0045335(phagocytic vesicle);GO:0043231(intracellular membrane-bounded organelle);GO:0005930(axoneme);GO:0005829(cytosol);GO:0005739(mitochondrion);GO:0005737(cytoplasm);GO:2000785(regulation of autophagosome assembly);GO:1903599(positive regulation of mitophagy);GO:0098779(positive regulation of macromitophagy in response to mitochondrial depolarization);GO:0043552(positive regulation of phosp…	NA
circRNA3246	9.11195	12.1221	12.5629	3.25983	4.38772	1.99368	11.2657	3.21374	up	1.80961	0.00563867	yes	chr2	17348985	17367528	+	4	circRNA	-	ENSSSCT00000014486	AMBRA1	mRNA	chr2:17320484-17348984|chr2:17367528-17421151	autophagy and beclin 1 regulator 1 [Source:HGNC Symbol;Acc:HGNC:25990]	GO:0045335(phagocytic vesicle);GO:0043231(intracellular membrane-bounded organelle);GO:0005930(axoneme);GO:0005829(cytosol);GO:0005739(mitochondrion);GO:0005737(cytoplasm);GO:2000785(regulation of autophagosome assembly);GO:1903599(positive regulation of mitophagy);GO:0098779(positive regulation of macromitophagy in response to mitochondrial depolarization);GO:0043552(positive regulation of phosp…	NA
circRNA3247	18.649	18.7262	24.1757	6.57206	4.66374	5.62452	20.517	5.62011	up	1.86815	0.00979187	yes	chr2	17431134	17447377	+	3	circRNA	-	ENSSSCT00000014486	AMBRA1	mRNA	chr2:17421265-17431133|chr2:17447377-17454943	autophagy and beclin 1 regulator 1 [Source:HGNC Symbol;Acc:HGNC:25990]	GO:0045335(phagocytic vesicle);GO:0043231(intracellular membrane-bounded organelle);GO:0005930(axoneme);GO:0005829(cytosol);GO:0005739(mitochondrion);GO:0005737(cytoplasm);GO:2000785(regulation of autophagosome assembly);GO:1903599(positive regulation of mitophagy);GO:0098779(positive regulation of macromitophagy in response to mitochondrial depolarization);GO:0043552(positive regulation of phosp…	NA
circRNA4666	4.05558	2.93102	4.10797	8.61045	4.97658	3.71411	3.69819	5.76705	down	-0.641015	0.292002	no	chr2	17314802	17316714	+	3	circRNA	-	ENSSSCT00000014486	AMBRA1	mRNA	chr2:17314130-17314801|chr2:17316714-17318156	autophagy and beclin 1 regulator 1 [Source:HGNC Symbol;Acc:HGNC:25990]	GO:0045335(phagocytic vesicle);GO:0043231(intracellular membrane-bounded organelle);GO:0005930(axoneme);GO:0005829(cytosol);GO:0005739(mitochondrion);GO:0005737(cytoplasm);GO:2000785(regulation of autophagosome assembly);GO:1903599(positive regulation of mitophagy);GO:0098779(positive regulation of macromitophagy in response to mitochondrial depolarization);GO:0043552(positive regulation of phosp…	NA
circRNA652	5.65272	4.19005	0.414534	16.5389	5.64554	4.77857	3.4191	8.98765	down	-1.39433	0.277428	no	chr2	17457620	17457813	+	1	circRNA	-	ENSSSCT00000014486	AMBRA1	mRNA	chr2:17455036-17457619|chr2:17457813-17463542	autophagy and beclin 1 regulator 1 [Source:HGNC Symbol;Acc:HGNC:25990]	GO:0045335(phagocytic vesicle);GO:0043231(intracellular membrane-bounded organelle);GO:0005930(axoneme);GO:0005829(cytosol);GO:0005739(mitochondrion);GO:0005737(cytoplasm);GO:2000785(regulation of autophagosome assembly);GO:1903599(positive regulation of mitophagy);GO:0098779(positive regulation of macromitophagy in response to mitochondrial depolarization);GO:0043552(positive regulation of phosp…	NA
circRNA948	5.39486	3.30819	5.26	7.07577	1.82487	2.39546	4.65435	3.76537	up	0.305789	0.658634	no	chr2	17431134	17433027	+	2	circRNA	-	ENSSSCT00000014486	AMBRA1	mRNA	chr2:17421265-17431133|chr2:17433027-17447237	autophagy and beclin 1 regulator 1 [Source:HGNC Symbol;Acc:HGNC:25990]	GO:0045335(phagocytic vesicle);GO:0043231(intracellular membrane-bounded organelle);GO:0005930(axoneme);GO:0005829(cytosol);GO:0005739(mitochondrion);GO:0005737(cytoplasm);GO:2000785(regulation of autophagosome assembly);GO:1903599(positive regulation of mitophagy);GO:0098779(positive regulation of macromitophagy in response to mitochondrial depolarization);GO:0043552(positive regulation of phosp…	NA
circRNA1023	1.11303	3.13858	1.87646	58.8847	15.4045	14.0283	2.04269	29.4391	down	-3.84919	0.20377	no	chr8	117532444	117557776	-	3	circRNA	-	ENSSSCT00000009992	ANK2	mRNA	chr8:117498361-117532443|chr8:117557776-117670997	ankyrin 2 [Source:HGNC Symbol;Acc:HGNC:493]	GO:0043034(costamere);GO:0016323(basolateral plasma membrane);GO:0005622(intracellular);GO:0098910(regulation of atrial cardiac muscle cell action potential);GO:0098907(regulation of SA node cell action potential);GO:0086091(regulation of heart rate by cardiac conduction);GO:0086070(SA node cell to atrial cardiac muscle cell communication);GO:0086014(atrial cardiac muscle cell action potential);G…	05205(Proteoglycans in cancer)
circRNA1561	1.31806	0.981447	0.628277	3.77179	1.82134	0.919685	0.975929	2.17094	down	-1.15347	0.289529	no	chr8	117409970	117417580	-	3	circRNA	-	ENSSSCT00000009992	ANK2	mRNA	chr8:117398681-117409969|chr8:117417580-117429652	ankyrin 2 [Source:HGNC Symbol;Acc:HGNC:493]	GO:0043034(costamere);GO:0016323(basolateral plasma membrane);GO:0005622(intracellular);GO:0098910(regulation of atrial cardiac muscle cell action potential);GO:0098907(regulation of SA node cell action potential);GO:0086091(regulation of heart rate by cardiac conduction);GO:0086070(SA node cell to atrial cardiac muscle cell communication);GO:0086014(atrial cardiac muscle cell action potential);G…	05205(Proteoglycans in cancer)
circRNA5001	0.355034	0.136847	0.744625	0.838176	1.30417	1.73409	0.412168	1.29214	down	-1.64846	0.0558541	no	chr8	117456050	117456784	-	2	circRNA	-	ENSSSCT00000009992	ANK2	mRNA	chr8:117451550-117456049|chr8:117456784-117460398	ankyrin 2 [Source:HGNC Symbol;Acc:HGNC:493]	GO:0043034(costamere);GO:0016323(basolateral plasma membrane);GO:0005622(intracellular);GO:0098910(regulation of atrial cardiac muscle cell action potential);GO:0098907(regulation of SA node cell action potential);GO:0086091(regulation of heart rate by cardiac conduction);GO:0086070(SA node cell to atrial cardiac muscle cell communication);GO:0086014(atrial cardiac muscle cell action potential);G…	05205(Proteoglycans in cancer)
circRNA5659	3.92668	1.72882	2.54941	9.70091	5.33832	5.43249	2.73497	6.82391	down	-1.31907	0.0876969	no	chr8	117409970	117438238	-	6	circRNA	-	ENSSSCT00000009992	ANK2	mRNA	chr8:117398681-117409969|chr8:117438238-117447702	ankyrin 2 [Source:HGNC Symbol;Acc:HGNC:493]	GO:0043034(costamere);GO:0016323(basolateral plasma membrane);GO:0005622(intracellular);GO:0098910(regulation of atrial cardiac muscle cell action potential);GO:0098907(regulation of SA node cell action potential);GO:0086091(regulation of heart rate by cardiac conduction);GO:0086070(SA node cell to atrial cardiac muscle cell communication);GO:0086014(atrial cardiac muscle cell action potential);G…	05205(Proteoglycans in cancer)
circRNA6159	2.35436	0.855238	2.64808	6.38772	7.01575	5.8637	1.95256	6.42239	down	-1.71774	0.00466811	yes	chr8	117447703	117498361	-	16	circRNA	-	ENSSSCT00000009992	ANK2	mRNA	chr8:117438238-117447702|chr8:117498361-117532443	ankyrin 2 [Source:HGNC Symbol;Acc:HGNC:493]	GO:0043034(costamere);GO:0016323(basolateral plasma membrane);GO:0005622(intracellular);GO:0098910(regulation of atrial cardiac muscle cell action potential);GO:0098907(regulation of SA node cell action potential);GO:0086091(regulation of heart rate by cardiac conduction);GO:0086070(SA node cell to atrial cardiac muscle cell communication);GO:0086014(atrial cardiac muscle cell action potential);G…	05205(Proteoglycans in cancer)
circRNA6160	1.78861	1.17575	0.277582	10.0201	7.85057	11.2902	1.08065	9.72028	down	-3.1691	0.00586529	yes	chr8	117488167	117498361	-	5	circRNA	-	ENSSSCT00000009992	ANK2	mRNA	chr8:117480927-117488166|chr8:117498361-117532443	ankyrin 2 [Source:HGNC Symbol;Acc:HGNC:493]	GO:0043034(costamere);GO:0016323(basolateral plasma membrane);GO:0005622(intracellular);GO:0098910(regulation of atrial cardiac muscle cell action potential);GO:0098907(regulation of SA node cell action potential);GO:0086091(regulation of heart rate by cardiac conduction);GO:0086070(SA node cell to atrial cardiac muscle cell communication);GO:0086014(atrial cardiac muscle cell action potential);G…	05205(Proteoglycans in cancer)
circRNA6751	1.10568	0.537612	0.938034	1.49674	0.526808	2.49142	0.860441	1.50499	down	-0.806607	0.374952	no	chr8	117448499	117460596	-	5	circRNA	-	ENSSSCT00000009992	ANK2	mRNA	chr8:117447801-117448498|chr8:117460596-117467102	ankyrin 2 [Source:HGNC Symbol;Acc:HGNC:493]	GO:0043034(costamere);GO:0016323(basolateral plasma membrane);GO:0005622(intracellular);GO:0098910(regulation of atrial cardiac muscle cell action potential);GO:0098907(regulation of SA node cell action potential);GO:0086091(regulation of heart rate by cardiac conduction);GO:0086070(SA node cell to atrial cardiac muscle cell communication);GO:0086014(atrial cardiac muscle cell action potential);G…	05205(Proteoglycans in cancer)
circRNA185	2.78403	0.938958	2.17305	5.3859	6.00602	1.50549	1.96535	4.29914	down	-1.12926	0.233956	no	chr2	86318061	86318262	+	1	circRNA	-	ENSSSCT00000015384	ANKDD1B	mRNA	chr2:86314066-86318060|chr2:86318262-86321526	ankyrin repeat and death domain containing 1B [Source:HGNC Symbol;Acc:HGNC:32525]	GO:0007165(signal transduction)	NA
circRNA3268	5.56466	5.02066	5.43451	2.41733	4.60556	1.87132	5.33995	2.96474	up	0.848921	0.0995286	no	chr2	86300002	86318262	+	5	circRNA	-	ENSSSCT00000015384	ANKDD1B	mRNA	chr2:86291987-86300001|chr2:86318262-86321526	ankyrin repeat and death domain containing 1B [Source:HGNC Symbol;Acc:HGNC:32525]	GO:0007165(signal transduction)	NA
circRNA3888	8.23678	5.81598	2.28464	0.745045	4.91313	2.67545	5.4458	2.77787	up	0.971164	0.281598	no	chr2	86306052	86309200	+	2	circRNA	-	ENSSSCT00000015384	ANKDD1B	mRNA	chr2:86300100-86306051|chr2:86309200-86313970	ankyrin repeat and death domain containing 1B [Source:HGNC Symbol;Acc:HGNC:32525]	GO:0007165(signal transduction)	NA
circRNA664	15.4795	15.19	18.6833	1.58322	10.4334	5.74726	16.4509	5.92128	up	1.47419	0.0380825	yes	chr2	86283747	86291987	+	3	circRNA	-	ENSSSCT00000015384	ANKDD1B	mRNA	chr2:86275268-86283746|chr2:86291987-86300001	ankyrin repeat and death domain containing 1B [Source:HGNC Symbol;Acc:HGNC:32525]	GO:0007165(signal transduction)	NA
circRNA956	6.25017	6.02277	4.00611	2.89982	4.23225	2.24482	5.42635	3.12563	up	0.795834	0.0695353	no	chr2	86306052	86318262	+	4	circRNA	-	ENSSSCT00000015384	ANKDD1B	mRNA	chr2:86300100-86306051|chr2:86318262-86321526	ankyrin repeat and death domain containing 1B [Source:HGNC Symbol;Acc:HGNC:32525]	GO:0007165(signal transduction)	NA
circRNA201	7.37615	8.05164	7.98478	1.86147	1.96233	3.47301	7.80419	2.43227	up	1.68195	0.0039508	yes	chr2	148139473	148156756	+	6	circRNA	-	ENSSSCT00000015694	ANKHD1	mRNA	chr2:148138091-148139472|chr2:148156756-148163289	NA	GO:0005737(cytoplasm);GO:0045087(innate immune response);GO:0003723(RNA binding);GO:0003676(nucleic acid binding)	NA
circRNA6620	1.13995	2.33425	1.15467	3.69109	0.67685	3.62903	1.54296	2.66566	down	-0.788793	0.38129	no	chr2	148139473	148140466	+	2	circRNA	-	ENSSSCT00000015694	ANKHD1	mRNA	chr2:148138091-148139472|chr2:148140466-148143265	NA	GO:0005737(cytoplasm);GO:0045087(innate immune response);GO:0003723(RNA binding);GO:0003676(nucleic acid binding)	NA
circRNA1501	10.7031	16.7311	13.1513	2.75558	6.06734	3.983	13.5285	4.26864	up	1.66415	0.0174352	yes	chr9	79015624	79031079	+	4	circRNA	-	ENSSSCT00000016687	ANKIB1	mRNA	chr9:79007550-79015623|chr9:79031079-79036905	ankyrin repeat and IBR domain containing 1 [Source:HGNC Symbol;Acc:HGNC:22215]	GO:0005737(cytoplasm);GO:0000151(ubiquitin ligase complex);GO:0042787(protein ubiquitination involved in ubiquitin-dependent protein catabolic process);GO:0032436(positive regulation of proteasomal ubiquitin-dependent protein catabolic process);GO:0016567(protein ubiquitination);GO:0000209(protein polyubiquitination);GO:0061630(ubiquitin protein ligase activity);GO:0046872(metal ion binding);GO:0…	NA
circRNA6121	0.302351	0	1.22503	0	1.29257	0	0.509127	0.430855	up	0.240821	0.897011	no	chr9	78959290	78959568	+	1	circRNA	-	ENSSSCT00000016687	ANKIB1	mRNA	None|chr9:78959568-78970956	ankyrin repeat and IBR domain containing 1 [Source:HGNC Symbol;Acc:HGNC:22215]	GO:0005737(cytoplasm);GO:0000151(ubiquitin ligase complex);GO:0042787(protein ubiquitination involved in ubiquitin-dependent protein catabolic process);GO:0032436(positive regulation of proteasomal ubiquitin-dependent protein catabolic process);GO:0016567(protein ubiquitination);GO:0000209(protein polyubiquitination);GO:0061630(ubiquitin protein ligase activity);GO:0046872(metal ion binding);GO:0…	NA
circRNA6122	7.04364	10.1407	9.31299	1.45723	0.327496	1.11167	8.83243	0.965463	up	3.19352	0.00754682	yes	chr9	78985271	79022424	+	7	circRNA	-	ENSSSCT00000016687	ANKIB1	mRNA	chr9:78971257-78985270|chr9:79022424-79030948	ankyrin repeat and IBR domain containing 1 [Source:HGNC Symbol;Acc:HGNC:22215]	GO:0005737(cytoplasm);GO:0000151(ubiquitin ligase complex);GO:0042787(protein ubiquitination involved in ubiquitin-dependent protein catabolic process);GO:0032436(positive regulation of proteasomal ubiquitin-dependent protein catabolic process);GO:0016567(protein ubiquitination);GO:0000209(protein polyubiquitination);GO:0061630(ubiquitin protein ligase activity);GO:0046872(metal ion binding);GO:0…	NA
circRNA6719	5.93652	7.98107	5.63667	1.25584	1.64745	0.768318	6.51808	1.22387	up	2.413	0.0117637	yes	chr9	78959290	78997862	+	4	circRNA	-	ENSSSCT00000016687	ANKIB1	mRNA	None|chr9:78997862-79005634	ankyrin repeat and IBR domain containing 1 [Source:HGNC Symbol;Acc:HGNC:22215]	GO:0005737(cytoplasm);GO:0000151(ubiquitin ligase complex);GO:0042787(protein ubiquitination involved in ubiquitin-dependent protein catabolic process);GO:0032436(positive regulation of proteasomal ubiquitin-dependent protein catabolic process);GO:0016567(protein ubiquitination);GO:0000209(protein polyubiquitination);GO:0061630(ubiquitin protein ligase activity);GO:0046872(metal ion binding);GO:0…	NA
circRNA1357	1.21848	2.8902	0.71484	0	0	1.8966	1.60784	0.632199	up	1.34667	0.345109	no	chr2	84231850	84234187	+	2	circRNA	-	ENSSSCT00000015370	ANKRA2	mRNA	chr2:84230945-84231849|chr2:84234187-84236803	ankyrin repeat family A member 2 [Source:HGNC Symbol;Acc:HGNC:13208]	GO:1990393(3M complex);GO:0016020(membrane);GO:0005829(cytosol);GO:0005737(cytoplasm);GO:0005634(nucleus);GO:0043254(regulation of protein complex assembly);GO:0006357(regulation of transcription from RNA polymerase II promoter);GO:0050750(low-density lipoprotein particle receptor binding);GO:0042826(histone deacetylase binding);GO:0031625(ubiquitin protein ligase binding);GO:0003712(transcriptio…	NA
circRNA6613	1.72426	0	0	0	0	2.68386	0.574753	0.894621	down	-0.638335	0.78098	no	chr2	84231850	84232008	+	1	circRNA	-	ENSSSCT00000015370	ANKRA2	mRNA	chr2:84230945-84231849|chr2:84232008-84234121	ankyrin repeat family A member 2 [Source:HGNC Symbol;Acc:HGNC:13208]	GO:1990393(3M complex);GO:0016020(membrane);GO:0005829(cytosol);GO:0005737(cytoplasm);GO:0005634(nucleus);GO:0043254(regulation of protein complex assembly);GO:0006357(regulation of transcription from RNA polymerase II promoter);GO:0050750(low-density lipoprotein particle receptor binding);GO:0042826(histone deacetylase binding);GO:0031625(ubiquitin protein ligase binding);GO:0003712(transcriptio…	NA
circRNA3745	6.15096	3.04826	9.38228	0	0	1.59412	6.19383	0.531374	up	3.54303	0.0803684	no	chr6	92037395	92039424	-	2	circRNA	-	ENSSSCT00000004080	ANKRD12	mRNA	chr6:92036374-92037394|chr6:92039424-92042984	ankyrin repeat domain 12 [Source:HGNC Symbol;Acc:HGNC:29135]	GO:0005829(cytosol);GO:0005654(nucleoplasm)	NA
circRNA4451	5.20495	9.8582	9.41079	0	5.00159	3.00561	8.15798	2.66907	up	1.61188	0.0573629	no	chr6	92078907	92102784	-	6	circRNA	-	ENSSSCT00000004080	ANKRD12	mRNA	chr6:92055373-92078906|chr6:92102784-92111297	ankyrin repeat domain 12 [Source:HGNC Symbol;Acc:HGNC:29135]	GO:0005829(cytosol);GO:0005654(nucleoplasm)	NA
circRNA1928	8.20658	7.96931	13.2668	0.531919	0.634585	1.56471	9.81423	0.910406	up	3.43029	0.0318698	yes	chr6	132155138	132173603	+	4	circRNA	-	ENSSSCT00000004194	ANKRD13C	mRNA	chr6:132151229-132155137|chr6:132173603-132184834	ankyrin repeat domain 13C [Source:HGNC Symbol;Acc:HGNC:25374]	GO:0048471(perinuclear region of cytoplasm);GO:0005783(endoplasmic reticulum);GO:2000209(regulation of anoikis);GO:0010869(regulation of receptor biosynthetic process);GO:0006621(protein retention in ER lumen);GO:0005102(receptor binding)	NA
circRNA3751	10.6142	8.808	8.65706	4.47937	0.693681	3.11251	9.35975	2.76186	up	1.76083	0.0121558	yes	chr6	132124985	132145007	+	4	circRNA	-	ENSSSCT00000004194	ANKRD13C	mRNA	chr6:132117840-132124984|chr6:132145007-132151097	ankyrin repeat domain 13C [Source:HGNC Symbol;Acc:HGNC:25374]	GO:0048471(perinuclear region of cytoplasm);GO:0005783(endoplasmic reticulum);GO:2000209(regulation of anoikis);GO:0010869(regulation of receptor biosynthetic process);GO:0006621(protein retention in ER lumen);GO:0005102(receptor binding)	NA
circRNA6481	9.75546	16.8657	11.215	3.9514	0.181721	1.00102	12.612	1.71138	up	2.88157	0.0206599	yes	chr6	132108169	132117840	+	2	circRNA	-	ENSSSCT00000004194	ANKRD13C	mRNA	chr6:132080954-132108168|chr6:132117840-132124984	ankyrin repeat domain 13C [Source:HGNC Symbol;Acc:HGNC:25374]	GO:0048471(perinuclear region of cytoplasm);GO:0005783(endoplasmic reticulum);GO:2000209(regulation of anoikis);GO:0010869(regulation of receptor biosynthetic process);GO:0006621(protein retention in ER lumen);GO:0005102(receptor binding)	NA
circRNA6482	10.3208	9.52147	12.5285	1.9892	0.681994	2.21703	10.7903	1.62941	up	2.72731	0.00272502	yes	chr6	132124985	132173603	+	9	circRNA	-	ENSSSCT00000004194	ANKRD13C	mRNA	chr6:132117840-132124984|chr6:132173603-132184834	ankyrin repeat domain 13C [Source:HGNC Symbol;Acc:HGNC:25374]	GO:0048471(perinuclear region of cytoplasm);GO:0005783(endoplasmic reticulum);GO:2000209(regulation of anoikis);GO:0010869(regulation of receptor biosynthetic process);GO:0006621(protein retention in ER lumen);GO:0005102(receptor binding)	NA
circRNA4980	0.958591	2.15534	2.64003	0	0	0.966134	1.91799	0.322045	up	2.57426	0.065002	no	chr8	73375718	73375915	-	1	circRNA	-	ENSSSCT00000028188	ANKRD17	mRNA	chr8:73366189-73375717|chr8:73375915-73381002	ankyrin repeat domain-containing protein 17 [Source:RefSeq peptide;Acc:NP_001188312]	GO:0031965(nuclear membrane);GO:0016020(membrane);GO:0005737(cytoplasm);GO:0005634(nucleus);GO:0000785(chromatin);GO:1900246(positive regulation of RIG-I signaling pathway);GO:1900245(positive regulation of MDA-5 signaling pathway);GO:1900087(positive regulation of G1/S transition of mitotic cell cycle);GO:0051151(negative regulation of smooth muscle cell differentiation);GO:0045787(positive regu…	NA
circRNA4981	1.89629	2.00449	3.08969	1.43198	0.81522	0.665582	2.33015	0.970927	up	1.26299	0.0489676	yes	chr8	73375718	73382639	-	2	circRNA	-	ENSSSCT00000028188	ANKRD17	mRNA	chr8:73366189-73375717|chr8:73382639-73384478	ankyrin repeat domain-containing protein 17 [Source:RefSeq peptide;Acc:NP_001188312]	GO:0031965(nuclear membrane);GO:0016020(membrane);GO:0005737(cytoplasm);GO:0005634(nucleus);GO:0000785(chromatin);GO:1900246(positive regulation of RIG-I signaling pathway);GO:1900245(positive regulation of MDA-5 signaling pathway);GO:1900087(positive regulation of G1/S transition of mitotic cell cycle);GO:0051151(negative regulation of smooth muscle cell differentiation);GO:0045787(positive regu…	NA
circRNA1574	3.27336	2.37863	2.35324	2.04105	0.237902	0.786296	2.66841	1.02175	up	1.38494	0.070594	no	chr13	3109788	3113691	-	3	circRNA	-	ENSSSCT00000012259	ANKRD28	mRNA	chr13:3108013-3109787|chr13:3113691-3114888	ankyrin repeat domain 28 [Source:HGNC Symbol;Acc:HGNC:29024]	NA	NA
circRNA1575	1.16756	0.0468783	0.371024	0	1.81784	0.305501	0.528487	0.707781	down	-0.421436	0.800252	no	chr13	3130975	3132568	-	2	circRNA	-	ENSSSCT00000012259	ANKRD28	mRNA	chr13:3122936-3130974|chr13:3132568-3137878	ankyrin repeat domain 28 [Source:HGNC Symbol;Acc:HGNC:29024]	NA	NA
circRNA2343	8.41761	4.91016	4.29419	1.26416	1.48948	0.941543	5.87398	1.23173	up	2.25366	0.0666228	no	chr13	3089207	3113691	-	11	circRNA	-	ENSSSCT00000012259	ANKRD28	mRNA	chr13:3088127-3089206|chr13:3113691-3114888	ankyrin repeat domain 28 [Source:HGNC Symbol;Acc:HGNC:29024]	NA	NA
circRNA2920	0.492734	0.91796	1.97291	2.21882	1.89321	0	1.12787	1.37068	down	-0.281291	0.78433	no	chr13	3095926	3097707	-	3	circRNA	-	ENSSSCT00000012259	ANKRD28	mRNA	chr13:3092588-3095925|chr13:3097707-3105139	ankyrin repeat domain 28 [Source:HGNC Symbol;Acc:HGNC:29024]	NA	NA
circRNA4081	2.83139	2.94791	2.15631	0	1.2161	0.204375	2.6452	0.473492	up	2.48197	0.0121518	yes	chr13	3122794	3132568	-	3	circRNA	-	ENSSSCT00000012259	ANKRD28	mRNA	chr13:3120194-3122793|chr13:3132568-3137878	ankyrin repeat domain 28 [Source:HGNC Symbol;Acc:HGNC:29024]	NA	NA
circRNA5015	0.939609	0.603616	0.895762	0.0456433	0.837537	1.60262	0.812996	0.8286	down	-0.0274285	0.975835	no	chr13	3092387	3092588	-	1	circRNA	-	ENSSSCT00000012259	ANKRD28	mRNA	chr13:3089627-3092386|chr13:3092588-3095925	ankyrin repeat domain 28 [Source:HGNC Symbol;Acc:HGNC:29024]	NA	NA
circRNA5016	3.33611	2.64068	1.77479	2.41242	1.36772	0.997625	2.58386	1.59259	up	0.698155	0.184938	no	chr13	3105140	3113691	-	5	circRNA	-	ENSSSCT00000012259	ANKRD28	mRNA	chr13:3097707-3105139|chr13:3113691-3114888	ankyrin repeat domain 28 [Source:HGNC Symbol;Acc:HGNC:29024]	NA	NA
circRNA6165	3.00804	5.88123	1.50657	0.514601	0.855921	0.8213	3.46528	0.730608	up	2.2458	0.165919	no	chr13	3119982	3132568	-	4	circRNA	-	ENSSSCT00000012259	ANKRD28	mRNA	chr13:3114967-3119981|chr13:3132568-3137878	ankyrin repeat domain 28 [Source:HGNC Symbol;Acc:HGNC:29024]	NA	NA
circRNA1756	11.9414	17.5427	21.9951	6.61944	5.59375	3.89884	17.1597	5.37068	up	1.67585	0.0474598	yes	chr15	112201333	112260631	-	3	circRNA	-	ENSSSCT00000017501	ANKRD44	mRNA	chr15:112180354-112201332|chr15:112260631-112388791	ankyrin repeat domain 44 [Source:HGNC Symbol;Acc:HGNC:25259]	NA	NA
circRNA2567	0.905431	0.87249	0.755282	0	1.63671	1.52678	0.844401	1.0545	down	-0.320553	0.729682	no	chr15	112138368	112148920	-	6	circRNA	-	ENSSSCT00000017501	ANKRD44	mRNA	chr15:112090965-112138367|chr15:112148920-112157785	ankyrin repeat domain 44 [Source:HGNC Symbol;Acc:HGNC:25259]	NA	NA
circRNA3018	1.72546	0.960664	2.22981	0	0.821628	1.03451	1.63865	0.618712	up	1.40517	0.105173	no	chr15	112157786	112176497	-	4	circRNA	-	ENSSSCT00000017501	ANKRD44	mRNA	chr15:112148920-112157785|chr15:112176497-112179414	ankyrin repeat domain 44 [Source:HGNC Symbol;Acc:HGNC:25259]	NA	NA
circRNA3606	3.36989	0.209502	0.725434	0	2.32936	0.505669	1.43494	0.945009	up	0.602594	0.707679	no	chr15	112157786	112167019	-	2	circRNA	-	ENSSSCT00000017501	ANKRD44	mRNA	chr15:112148920-112157785|chr15:112167019-112175033	ankyrin repeat domain 44 [Source:HGNC Symbol;Acc:HGNC:25259]	NA	NA
circRNA6325	4.00503	2.53268	1.223	0	1.70094	1.54282	2.5869	1.08125	up	1.25852	0.20512	no	chr15	112138368	112157900	-	7	circRNA	-	ENSSSCT00000017501	ANKRD44	mRNA	chr15:112090965-112138367|chr15:112157900-112166940	ankyrin repeat domain 44 [Source:HGNC Symbol;Acc:HGNC:25259]	NA	NA
circRNA2689	24.015	31.3338	17.1049	4.72461	6.81811	5.21958	24.1512	5.58743	up	2.11184	0.042819	yes	chr7	35702432	35743335	+	3	circRNA	-	ENSSSCT00000001709	ANKS1A	mRNA	chr7:35686026-35702431|chr7:35743335-35759127	ankyrin repeat and SAM domain-containing protein 1A [Source:RefSeq peptide;Acc:NP_001233193]	GO:0005829(cytosol);GO:0005654(nucleoplasm);GO:1901187(regulation of ephrin receptor signaling pathway);GO:0046875(ephrin receptor binding)	NA
circRNA3693	0.78637	0.723316	0.817825	1.28923	0.996079	1.02257	0.775837	1.10262	down	-0.507116	0.0629974	no	chr7	35702432	35703021	+	1	circRNA	-	ENSSSCT00000001709	ANKS1A	mRNA	chr7:35686026-35702431|chr7:35703021-35737868	ankyrin repeat and SAM domain-containing protein 1A [Source:RefSeq peptide;Acc:NP_001233193]	GO:0005829(cytosol);GO:0005654(nucleoplasm);GO:1901187(regulation of ephrin receptor signaling pathway);GO:0046875(ephrin receptor binding)	NA
circRNA2798	2.56853	1.38952	1.03102	0	0	0	1.66302	0	up	Inf	0.0699114	no	chr2	40431943	40438014	-	3	circRNA	-	ENSSSCT00000014572	ANO5	mRNA	chr2:40426629-40431942|chr2:40438014-40440954	anoctamin 5 [Source:HGNC Symbol;Acc:HGNC:27337]	GO:0031982(vesicle);GO:0016021(integral component of membrane);GO:0016020(membrane);GO:0005886(plasma membrane);GO:0005622(intracellular);GO:1902476(chloride transmembrane transport);GO:0006821(chloride transport);GO:0046983(protein dimerization activity);GO:0005229(intracellular calcium activated chloride channel activity)	NA
circRNA3876	3.32348	2.09622	0.835303	0	0.24876	0.632448	2.085	0.293736	up	2.82746	0.122443	no	chr2	40423285	40438014	-	5	circRNA	-	ENSSSCT00000014572	ANO5	mRNA	chr2:40413778-40423284|chr2:40438014-40440954	anoctamin 5 [Source:HGNC Symbol;Acc:HGNC:27337]	GO:0031982(vesicle);GO:0016021(integral component of membrane);GO:0016020(membrane);GO:0005886(plasma membrane);GO:0005622(intracellular);GO:1902476(chloride transmembrane transport);GO:0006821(chloride transport);GO:0046983(protein dimerization activity);GO:0005229(intracellular calcium activated chloride channel activity)	NA
circRNA5993	7.41286	2.44472	7.82276	0	0.326381	0.829791	5.89345	0.385391	up	3.93472	0.0832329	no	chr2	40412570	40426629	-	5	circRNA	-	ENSSSCT00000014572	ANO5	mRNA	chr2:40404905-40412569|chr2:40426629-40431942	anoctamin 5 [Source:HGNC Symbol;Acc:HGNC:27337]	GO:0031982(vesicle);GO:0016021(integral component of membrane);GO:0016020(membrane);GO:0005886(plasma membrane);GO:0005622(intracellular);GO:1902476(chloride transmembrane transport);GO:0006821(chloride transport);GO:0046983(protein dimerization activity);GO:0005229(intracellular calcium activated chloride channel activity)	NA
circRNA1028	4.34185	1.85286	4.6123	2.15584	6.12828	2.2938	3.60234	3.52597	up	0.0309114	0.963854	no	chr8	146890664	146892955	+	4	circRNA	-	ENSSSCT00000010136	ANTXR2	mRNA	chr8:146875559-146890663|chr8:146892955-146911443	anthrax toxin receptor 2 [Source:HGNC Symbol;Acc:HGNC:21732]	GO:0016021(integral component of membrane);GO:0016020(membrane);GO:0009986(cell surface);GO:0009897(external side of plasma membrane);GO:1901998(toxin transport);GO:0022414(reproductive process);GO:0046872(metal ion binding);GO:0004872(receptor activity)	NA
circRNA1571	2.6311	4.3353	6.31868	0	0	2.01805	4.42836	0.672684	up	2.71877	0.0504694	no	chr8	146931116	146941701	+	2	circRNA	-	ENSSSCT00000010136	ANTXR2	mRNA	chr8:146915909-146931115|chr8:146941701-146956378	anthrax toxin receptor 2 [Source:HGNC Symbol;Acc:HGNC:21732]	GO:0016021(integral component of membrane);GO:0016020(membrane);GO:0009986(cell surface);GO:0009897(external side of plasma membrane);GO:1901998(toxin transport);GO:0022414(reproductive process);GO:0046872(metal ion binding);GO:0004872(receptor activity)	NA
circRNA2340	12.3249	18.164	21.8896	0.830517	1.25544	3.4194	17.4595	1.83512	up	3.25006	0.0232095	yes	chr8	146915840	146957342	+	5	circRNA	-	ENSSSCT00000010136	ANTXR2	mRNA	chr8:146913630-146915839|chr8:146957342-146962655	anthrax toxin receptor 2 [Source:HGNC Symbol;Acc:HGNC:21732]	GO:0016021(integral component of membrane);GO:0016020(membrane);GO:0009986(cell surface);GO:0009897(external side of plasma membrane);GO:1901998(toxin transport);GO:0022414(reproductive process);GO:0046872(metal ion binding);GO:0004872(receptor activity)	NA
circRNA6766	16.9231	15.5845	15.949	2.74742	3.67528	5.29344	16.1522	3.90538	up	2.0482	0.000633232	yes	chr8	146890664	146941701	+	9	circRNA	-	ENSSSCT00000010136	ANTXR2	mRNA	chr8:146875559-146890663|chr8:146941701-146956378	anthrax toxin receptor 2 [Source:HGNC Symbol;Acc:HGNC:21732]	GO:0016021(integral component of membrane);GO:0016020(membrane);GO:0009986(cell surface);GO:0009897(external side of plasma membrane);GO:1901998(toxin transport);GO:0022414(reproductive process);GO:0046872(metal ion binding);GO:0004872(receptor activity)	NA
circRNA1102	2.69826	3.83171	5.88931	0.558784	2.72827	2.77454	4.13976	2.02053	up	1.03481	0.15262	no	chr15	115465676	115466348	+	2	circRNA	-	ENSSSCT00000027335	AOX1	mRNA	chr15:115461689-115465675|chr15:115466348-115468487	aldehyde oxidase 1 [Source:RefSeq peptide;Acc:NP_001295402]	GO:0070062(extracellular exosome);GO:0016604(nuclear body);GO:0005829(cytosol);GO:0055114(oxidation-reduction process);GO:0051537(2 iron, 2 sulfur cluster binding);GO:0051536(iron-sulfur cluster binding);GO:0051287(NAD binding);GO:0050660(flavin adenine dinucleotide binding);GO:0046872(metal ion binding);GO:0016614(oxidoreductase activity, acting on CH-OH group of donors);GO:0016491(oxidoreductas…	00280(Valine, leucine and isoleucine degradation);00350(Tyrosine metabolism);00380(Tryptophan metabolism);00750(Vitamin B6 metabolism);00760(Nicotinate and nicotinamide metabolism);00830(Retinol metabolism);00982(Drug metabolism - cytochrome P450)
circRNA3608	17.6634	12.7913	21.9929	2.7379	10.9835	1.49391	17.4825	5.07178	up	1.78535	0.0365126	yes	chr15	115438915	115445769	+	5	circRNA	-	ENSSSCT00000027335	AOX1	mRNA	chr15:115429783-115438914|chr15:115445769-115449792	aldehyde oxidase 1 [Source:RefSeq peptide;Acc:NP_001295402]	GO:0070062(extracellular exosome);GO:0016604(nuclear body);GO:0005829(cytosol);GO:0055114(oxidation-reduction process);GO:0051537(2 iron, 2 sulfur cluster binding);GO:0051536(iron-sulfur cluster binding);GO:0051287(NAD binding);GO:0050660(flavin adenine dinucleotide binding);GO:0046872(metal ion binding);GO:0016614(oxidoreductase activity, acting on CH-OH group of donors);GO:0016491(oxidoreductas…	00280(Valine, leucine and isoleucine degradation);00350(Tyrosine metabolism);00380(Tryptophan metabolism);00750(Vitamin B6 metabolism);00760(Nicotinate and nicotinamide metabolism);00830(Retinol metabolism);00982(Drug metabolism - cytochrome P450)
circRNA477	15.2743	17.3947	8.10814	0	0.21986	3.02777	13.5924	1.08254	up	3.6503	0.0355152	yes	chr15	115494426	115497557	+	3	circRNA	-	ENSSSCT00000027335	AOX1	mRNA	chr15:115493476-115494425|chr15:115497557-115501349	aldehyde oxidase 1 [Source:RefSeq peptide;Acc:NP_001295402]	GO:0070062(extracellular exosome);GO:0016604(nuclear body);GO:0005829(cytosol);GO:0055114(oxidation-reduction process);GO:0051537(2 iron, 2 sulfur cluster binding);GO:0051536(iron-sulfur cluster binding);GO:0051287(NAD binding);GO:0050660(flavin adenine dinucleotide binding);GO:0046872(metal ion binding);GO:0016614(oxidoreductase activity, acting on CH-OH group of donors);GO:0016491(oxidoreductas…	00280(Valine, leucine and isoleucine degradation);00350(Tyrosine metabolism);00380(Tryptophan metabolism);00750(Vitamin B6 metabolism);00760(Nicotinate and nicotinamide metabolism);00830(Retinol metabolism);00982(Drug metabolism - cytochrome P450)
circRNA4069	3.17925	1.53179	4.14221	5.62926	2.68473	4.1409	2.95108	4.15163	down	-0.492433	0.352981	no	chr8	118377701	118385149	-	4	circRNA	-	ENSSSCT00000009996	AP1AR	mRNA	chr8:118376228-118377700|chr8:118385149-118400641	adaptor related protein complex 1 associated regulatory protein [Source:HGNC Symbol;Acc:HGNC:28808]	GO:0030133(transport vesicle);GO:0005829(cytosol);GO:0005794(Golgi apparatus);GO:0005768(endosome);GO:2000146(negative regulation of cell motility);GO:1900025(negative regulation of substrate adhesion-dependent cell spreading);GO:0048203(vesicle targeting, trans-Golgi to endosome);GO:0034613(cellular protein localization);GO:0034315(regulation of Arp2/3 complex-mediated actin nucleation);GO:00019…	NA
circRNA5660	2.12305	1.02291	3.84556	7.10059	10.5776	8.39444	2.33051	8.69089	down	-1.89886	0.00913324	yes	chr8	118376130	118385149	-	5	circRNA	-	ENSSSCT00000009996	AP1AR	mRNA	chr8:118373600-118376129|chr8:118385149-118400641	adaptor related protein complex 1 associated regulatory protein [Source:HGNC Symbol;Acc:HGNC:28808]	GO:0030133(transport vesicle);GO:0005829(cytosol);GO:0005794(Golgi apparatus);GO:0005768(endosome);GO:2000146(negative regulation of cell motility);GO:1900025(negative regulation of substrate adhesion-dependent cell spreading);GO:0048203(vesicle targeting, trans-Golgi to endosome);GO:0034613(cellular protein localization);GO:0034315(regulation of Arp2/3 complex-mediated actin nucleation);GO:00019…	NA
circRNA5442	15.639	19.5353	10.6925	3.21144	9.40458	0	15.2889	4.20534	up	1.86219	0.0424781	yes	chr6	14376991	14384261	-	2	circRNA	-	ENSSSCT00000003036	AP1G1	mRNA	chr6:14374678-14376990|chr6:14384261-14399039	adaptor related protein complex 1 gamma 1 subunit [Source:HGNC Symbol;Acc:HGNC:555]	GO:0055037(recycling endosome);GO:0043231(intracellular membrane-bounded organelle);GO:0030136(clathrin-coated vesicle);GO:0030131(clathrin adaptor complex);GO:0030117(membrane coat);GO:0016020(membrane);GO:0005829(cytosol);GO:0005794(Golgi apparatus);GO:0005737(cytoplasm);GO:0090160(Golgi to lysosome transport);GO:0045954(positive regulation of natural killer cell mediated cytotoxicity);GO:00433…	04142(Lysosome)
circRNA884	2.03834	5.13709	5.53071	0.719772	1.68818	4.70441	4.23538	2.37079	up	0.837124	0.317053	no	chr6	14354902	14355360	-	2	circRNA	-	ENSSSCT00000003036	AP1G1	mRNA	chr6:14348171-14354901|chr6:14355360-14356513	adaptor related protein complex 1 gamma 1 subunit [Source:HGNC Symbol;Acc:HGNC:555]	GO:0055037(recycling endosome);GO:0043231(intracellular membrane-bounded organelle);GO:0030136(clathrin-coated vesicle);GO:0030131(clathrin adaptor complex);GO:0030117(membrane coat);GO:0016020(membrane);GO:0005829(cytosol);GO:0005794(Golgi apparatus);GO:0005737(cytoplasm);GO:0090160(Golgi to lysosome transport);GO:0045954(positive regulation of natural killer cell mediated cytotoxicity);GO:00433…	04142(Lysosome)
circRNA3255	1.76794	1.01406	2.0466	2.26358	3.33246	2.76089	1.60953	2.78564	down	-0.791368	0.0543886	no	chr2	60996624	60999141	-	4	circRNA	-	ENSSSCT00000015135	AP1M1	mRNA	chr2:60990780-60996623|chr2:60999141-61006733	adaptor related protein complex 1 mu 1 subunit [Source:HGNC Symbol;Acc:HGNC:13667]	GO:0070062(extracellular exosome);GO:0030131(clathrin adaptor complex);GO:0016020(membrane);GO:0035646(endosome to melanosome transport);GO:0032438(melanosome organization);GO:0016192(vesicle-mediated transport);GO:0015031(protein transport);GO:0006886(intracellular protein transport);GO:0006810(transport)	04142(Lysosome)
circRNA6603	1.68174	3.40316	5.41902	2.64687	4.92082	5.02233	3.50131	4.19667	down	-0.261354	0.631253	no	chr2	60990655	60999141	-	5	circRNA	-	ENSSSCT00000015135	AP1M1	mRNA	chr2:60989783-60990654|chr2:60999141-61006733	adaptor related protein complex 1 mu 1 subunit [Source:HGNC Symbol;Acc:HGNC:13667]	GO:0070062(extracellular exosome);GO:0030131(clathrin adaptor complex);GO:0016020(membrane);GO:0035646(endosome to melanosome transport);GO:0032438(melanosome organization);GO:0016192(vesicle-mediated transport);GO:0015031(protein transport);GO:0006886(intracellular protein transport);GO:0006810(transport)	04142(Lysosome)
circRNA169	35.3632	22.5994	23.763	33.4575	25.8187	24.2465	27.2419	27.8409	down	-0.03138	0.910516	no	chr2	55694	57237	-	4	circRNA	-	ENSSSCT00000014031	AP2A2	mRNA	chr2:52733-55693|chr2:57237-59823	adaptor related protein complex 2 alpha 2 subunit [Source:HGNC Symbol;Acc:HGNC:562]	GO:0031410(cytoplasmic vesicle);GO:0030131(clathrin adaptor complex);GO:0030117(membrane coat);GO:0016020(membrane);GO:0005737(cytoplasm);GO:0016192(vesicle-mediated transport);GO:0015031(protein transport);GO:0006886(intracellular protein transport);GO:0006810(transport);GO:0019901(protein kinase binding);GO:0008565(protein transporter activity)	NA
circRNA170	21.4133	25.7434	18.7418	21.0444	16.7187	22.6544	21.9662	20.1392	up	0.125282	0.536732	no	chr2	61301	63998	-	4	circRNA	-	ENSSSCT00000014031	AP2A2	mRNA	chr2:59961-61300|chr2:63998-67322	adaptor related protein complex 2 alpha 2 subunit [Source:HGNC Symbol;Acc:HGNC:562]	GO:0031410(cytoplasmic vesicle);GO:0030131(clathrin adaptor complex);GO:0030117(membrane coat);GO:0016020(membrane);GO:0005737(cytoplasm);GO:0016192(vesicle-mediated transport);GO:0015031(protein transport);GO:0006886(intracellular protein transport);GO:0006810(transport);GO:0019901(protein kinase binding);GO:0008565(protein transporter activity)	NA
circRNA171	8.97901	8.09388	8.55282	15.2218	15.3395	8.56535	8.5419	13.0422	down	-0.610558	0.180629	no	chr2	67323	70923	-	3	circRNA	-	ENSSSCT00000014031	AP2A2	mRNA	chr2:63998-67322|chr2:70923-79834	adaptor related protein complex 2 alpha 2 subunit [Source:HGNC Symbol;Acc:HGNC:562]	GO:0031410(cytoplasmic vesicle);GO:0030131(clathrin adaptor complex);GO:0030117(membrane coat);GO:0016020(membrane);GO:0005737(cytoplasm);GO:0016192(vesicle-mediated transport);GO:0015031(protein transport);GO:0006886(intracellular protein transport);GO:0006810(transport);GO:0019901(protein kinase binding);GO:0008565(protein transporter activity)	NA
circRNA2791	7.20697	7.19602	6.84083	16.0049	13.3433	8.07067	7.08128	12.473	down	-0.816724	0.146512	no	chr2	69121	70923	-	2	circRNA	-	ENSSSCT00000014031	AP2A2	mRNA	chr2:67452-69120|chr2:70923-79834	adaptor related protein complex 2 alpha 2 subunit [Source:HGNC Symbol;Acc:HGNC:562]	GO:0031410(cytoplasmic vesicle);GO:0030131(clathrin adaptor complex);GO:0030117(membrane coat);GO:0016020(membrane);GO:0005737(cytoplasm);GO:0016192(vesicle-mediated transport);GO:0015031(protein transport);GO:0006886(intracellular protein transport);GO:0006810(transport);GO:0019901(protein kinase binding);GO:0008565(protein transporter activity)	NA
circRNA5984	46.1257	29.4315	29.6621	53.3439	37.5035	36.3887	35.0731	42.4121	down	-0.274109	0.398924	no	chr2	55694	56175	-	2	circRNA	-	ENSSSCT00000014031	AP2A2	mRNA	chr2:52733-55693|chr2:56175-56458	adaptor related protein complex 2 alpha 2 subunit [Source:HGNC Symbol;Acc:HGNC:562]	GO:0031410(cytoplasmic vesicle);GO:0030131(clathrin adaptor complex);GO:0030117(membrane coat);GO:0016020(membrane);GO:0005737(cytoplasm);GO:0016192(vesicle-mediated transport);GO:0015031(protein transport);GO:0006886(intracellular protein transport);GO:0006810(transport);GO:0019901(protein kinase binding);GO:0008565(protein transporter activity)	NA
circRNA5985	26.3154	26.3121	29.6572	25.6989	23.6314	16.5772	27.4282	21.9692	up	0.320181	0.176731	no	chr2	67323	79903	-	4	circRNA	-	ENSSSCT00000014031	AP2A2	mRNA	chr2:63998-67322|chr2:79903-93868	adaptor related protein complex 2 alpha 2 subunit [Source:HGNC Symbol;Acc:HGNC:562]	GO:0031410(cytoplasmic vesicle);GO:0030131(clathrin adaptor complex);GO:0030117(membrane coat);GO:0016020(membrane);GO:0005737(cytoplasm);GO:0016192(vesicle-mediated transport);GO:0015031(protein transport);GO:0006886(intracellular protein transport);GO:0006810(transport);GO:0019901(protein kinase binding);GO:0008565(protein transporter activity)	NA
circRNA2308	12.8433	13.6281	19.152	7.60317	6.67826	1.88296	15.2078	5.38813	up	1.49696	0.0214973	yes	chr8	33317026	33354941	+	4	circRNA	-	ENSSSCT00000029046	APBB2	mRNA	chr8:33316650-33317025|chr8:33354941-33410712	amyloid beta precursor protein binding family B member 2 [Source:HGNC Symbol;Acc:HGNC:582]	GO:0005737(cytoplasm);GO:0005634(nucleus);GO:0043066(negative regulation of apoptotic process);GO:0043065(positive regulation of apoptotic process);GO:0030308(negative regulation of cell growth);GO:0030198(extracellular matrix organization);GO:0007411(axon guidance);GO:0007050(cell cycle arrest);GO:0006355(regulation of transcription, DNA-templated);GO:0001764(neuron migration);GO:0008134(transcr…	NA
circRNA2309	0.536811	2.14302	2.33948	11.2651	8.79101	1.1772	1.6731	7.07777	down	-2.08077	0.21391	no	chr8	33351020	33354941	+	2	circRNA	-	ENSSSCT00000029046	APBB2	mRNA	chr8:33317260-33351019|chr8:33354941-33410712	amyloid beta precursor protein binding family B member 2 [Source:HGNC Symbol;Acc:HGNC:582]	GO:0005737(cytoplasm);GO:0005634(nucleus);GO:0043066(negative regulation of apoptotic process);GO:0043065(positive regulation of apoptotic process);GO:0030308(negative regulation of cell growth);GO:0030198(extracellular matrix organization);GO:0007411(axon guidance);GO:0007050(cell cycle arrest);GO:0006355(regulation of transcription, DNA-templated);GO:0001764(neuron migration);GO:0008134(transcr…	NA
circRNA2258	10.3322	11.4565	8.56819	18.61	9.54677	10.0733	10.119	12.7434	down	-0.332685	0.469707	no	chr9	63000517	63001823	+	2	circRNA	-	ENSSSCT00000016613	APLP2	mRNA	chr9:62965257-63000516|chr9:63001823-63011380	amyloid beta precursor like protein 2 [Source:HGNC Symbol;Acc:HGNC:598]	GO:0070062(extracellular exosome);GO:0016021(integral component of membrane);GO:0016020(membrane);GO:0005634(nucleus);GO:0010951(negative regulation of endopeptidase activity);GO:0046914(transition metal ion binding);GO:0042802(identical protein binding);GO:0008201(heparin binding);GO:0004867(serine-type endopeptidase inhibitor activity)	NA
circRNA285	36.5851	43.0168	34.9756	22.8479	10.8867	17.8298	38.1925	17.1882	up	1.15188	0.0101744	yes	chr9	63000517	63011493	+	3	circRNA	-	ENSSSCT00000016613	APLP2	mRNA	chr9:62965257-63000516|chr9:63011493-63012887	amyloid beta precursor like protein 2 [Source:HGNC Symbol;Acc:HGNC:598]	GO:0070062(extracellular exosome);GO:0016021(integral component of membrane);GO:0016020(membrane);GO:0005634(nucleus);GO:0010951(negative regulation of endopeptidase activity);GO:0046914(transition metal ion binding);GO:0042802(identical protein binding);GO:0008201(heparin binding);GO:0004867(serine-type endopeptidase inhibitor activity)	NA
circRNA1043	28.2246	24.1342	19.4313	16.0538	17.3836	12.2009	23.9301	15.2128	up	0.653543	0.0541255	no	chr13	199361578	199385121	-	5	circRNA	-	ENSSSCT00000013153	APP	mRNA	chr13:199323022-199361577|chr13:199385121-199436868	amyloid beta precursor protein [Source:HGNC Symbol;Acc:HGNC:620]	GO:0070062(extracellular exosome);GO:0051233(spindle midzone);GO:0048471(perinuclear region of cytoplasm);GO:0045202(synapse);GO:0045177(apical part of cell);GO:0045121(membrane raft);GO:0043235(receptor complex);GO:0043198(dendritic shaft);GO:0043197(dendritic spine);GO:0043005(neuron projection);GO:0035253(ciliary rootlet);GO:0031594(neuromuscular junction);GO:0031410(cytoplasmic vesicle);GO:00…	04726(Serotonergic synapse);05010(Alzheimer's disease)
circRNA2939	15.4561	11.4517	10.0197	7.83845	8.52728	12.7018	12.3092	9.68919	up	0.345283	0.304747	no	chr13	199473946	199476105	-	2	circRNA	-	ENSSSCT00000013153	APP	mRNA	chr13:199437071-199473945|chr13:199476105-199484657	amyloid beta precursor protein [Source:HGNC Symbol;Acc:HGNC:620]	GO:0070062(extracellular exosome);GO:0051233(spindle midzone);GO:0048471(perinuclear region of cytoplasm);GO:0045202(synapse);GO:0045177(apical part of cell);GO:0045121(membrane raft);GO:0043235(receptor complex);GO:0043198(dendritic shaft);GO:0043197(dendritic spine);GO:0043005(neuron projection);GO:0035253(ciliary rootlet);GO:0031594(neuromuscular junction);GO:0031410(cytoplasmic vesicle);GO:00…	04726(Serotonergic synapse);05010(Alzheimer's disease)
circRNA5687	10.258	10.7683	8.35882	10.7107	12.4491	5.87799	9.79503	9.67926	up	0.0171531	0.960031	no	chr13	199380000	199385121	-	3	circRNA	-	ENSSSCT00000013153	APP	mRNA	chr13:199362639-199379999|chr13:199385121-199436868	amyloid beta precursor protein [Source:HGNC Symbol;Acc:HGNC:620]	GO:0070062(extracellular exosome);GO:0051233(spindle midzone);GO:0048471(perinuclear region of cytoplasm);GO:0045202(synapse);GO:0045177(apical part of cell);GO:0045121(membrane raft);GO:0043235(receptor complex);GO:0043198(dendritic shaft);GO:0043197(dendritic spine);GO:0043005(neuron projection);GO:0035253(ciliary rootlet);GO:0031594(neuromuscular junction);GO:0031410(cytoplasmic vesicle);GO:00…	04726(Serotonergic synapse);05010(Alzheimer's disease)
circRNA6209	29.0034	22.7399	16.7924	17.7225	8.74133	16.5333	22.8452	14.3324	up	0.672614	0.135746	no	chr13	199473946	199484787	-	3	circRNA	-	ENSSSCT00000013153	APP	mRNA	chr13:199437071-199473945|chr13:199484787-199507161	amyloid beta precursor protein [Source:HGNC Symbol;Acc:HGNC:620]	GO:0070062(extracellular exosome);GO:0051233(spindle midzone);GO:0048471(perinuclear region of cytoplasm);GO:0045202(synapse);GO:0045177(apical part of cell);GO:0045121(membrane raft);GO:0043235(receptor complex);GO:0043198(dendritic shaft);GO:0043197(dendritic spine);GO:0043005(neuron projection);GO:0035253(ciliary rootlet);GO:0031594(neuromuscular junction);GO:0031410(cytoplasmic vesicle);GO:00…	04726(Serotonergic synapse);05010(Alzheimer's disease)
circRNA1649	5.63161	3.68106	9.23585	2.94418	3.44201	3.84705	6.18284	3.41108	up	0.858041	0.228474	no	chr12	39195360	39197730	-	2	circRNA	-	ENSSSCT00000019242	APPBP2	mRNA	chr12:39193158-39195359|chr12:39197730-39200634	amyloid beta precursor protein binding protein 2 [Source:HGNC Symbol;Acc:HGNC:622]	GO:0030659(cytoplasmic vesicle membrane);GO:0046907(intracellular transport)	NA
circRNA2433	4.55978	5.17851	6.831	8.95295	3.30045	3.56038	5.5231	5.27126	up	0.0673301	0.907415	no	chr12	39204753	39209375	-	2	circRNA	-	ENSSSCT00000019242	APPBP2	mRNA	chr12:39203584-39204752|chr12:39209375-39217480	amyloid beta precursor protein binding protein 2 [Source:HGNC Symbol;Acc:HGNC:622]	GO:0030659(cytoplasmic vesicle membrane);GO:0046907(intracellular transport)	NA
circRNA3511	17.5487	13.1551	15.1515	9.27005	13.2759	16.9009	15.2851	13.1489	up	0.217182	0.459175	no	chr12	39217481	39225437	-	2	circRNA	-	ENSSSCT00000019242	APPBP2	mRNA	chr12:39209375-39217480|chr12:39225437-39229661	amyloid beta precursor protein binding protein 2 [Source:HGNC Symbol;Acc:HGNC:622]	GO:0030659(cytoplasmic vesicle membrane);GO:0046907(intracellular transport)	NA
circRNA388	1.03053	0.70931	0	0	0	0.256806	0.579946	0.0856019	up	2.7602	0.241661	no	chr12	39197540	39197730	-	1	circRNA	-	ENSSSCT00000019242	APPBP2	mRNA	chr12:39195525-39197539|chr12:39197730-39200634	amyloid beta precursor protein binding protein 2 [Source:HGNC Symbol;Acc:HGNC:622]	GO:0030659(cytoplasmic vesicle membrane);GO:0046907(intracellular transport)	NA
circRNA5701	7.17362	4.8319	4.18566	4.04356	2.4768	3.90055	5.39706	3.47364	up	0.635726	0.157147	no	chr12	39209207	39217604	-	2	circRNA	-	ENSSSCT00000019242	APPBP2	mRNA	chr12:39204842-39209206|chr12:39217604-39225285	amyloid beta precursor protein binding protein 2 [Source:HGNC Symbol;Acc:HGNC:622]	GO:0030659(cytoplasmic vesicle membrane);GO:0046907(intracellular transport)	NA
circRNA6827	7.52079	5.51661	5.93293	3.60049	3.97399	5.4318	6.32344	4.33543	up	0.544536	0.0746973	no	chr12	39197540	39217604	-	8	circRNA	-	ENSSSCT00000019242	APPBP2	mRNA	chr12:39195525-39197539|chr12:39217604-39225285	amyloid beta precursor protein binding protein 2 [Source:HGNC Symbol;Acc:HGNC:622]	GO:0030659(cytoplasmic vesicle membrane);GO:0046907(intracellular transport)	NA
circRNA5592	1.01112	1.71668	0.459015	0.663078	0.335437	0.369554	1.06227	0.456023	up	1.21997	0.23299	no	chr1	152319829	152326850	-	4	circRNA	-	ENSSSCT00000005301	AQR	mRNA	chr1:152315343-152319828|chr1:152326850-152329158	aquarius intron-binding spliceosomal factor [Source:HGNC Symbol;Acc:HGNC:29513]	GO:0071013(catalytic step 2 spliceosome);GO:0016020(membrane);GO:0005681(spliceosomal complex);GO:0005654(nucleoplasm);GO:0000398(mRNA splicing, via spliceosome);GO:0003723(RNA binding)	03040(Spliceosome)
circRNA6056	2.62274	2.42417	2.99362	0.245709	0.124299	0.63491	2.68018	0.334973	up	3.00021	0.000512539	yes	chr1	152305080	152326850	-	9	circRNA	-	ENSSSCT00000005301	AQR	mRNA	chr1:152304162-152305079|chr1:152326850-152329158	aquarius intron-binding spliceosomal factor [Source:HGNC Symbol;Acc:HGNC:29513]	GO:0071013(catalytic step 2 spliceosome);GO:0016020(membrane);GO:0005681(spliceosomal complex);GO:0005654(nucleoplasm);GO:0000398(mRNA splicing, via spliceosome);GO:0003723(RNA binding)	03040(Spliceosome)
circRNA684	8.77603	8.69106	9.27269	12.0613	16.6326	7.03357	8.91326	11.9092	down	-0.418048	0.392802	no	chr1	152340211	152347427	-	5	circRNA	-	ENSSSCT00000005301	AQR	mRNA	chr1:152334981-152340210|chr1:152347427-152348802	aquarius intron-binding spliceosomal factor [Source:HGNC Symbol;Acc:HGNC:29513]	GO:0071013(catalytic step 2 spliceosome);GO:0016020(membrane);GO:0005681(spliceosomal complex);GO:0005654(nucleoplasm);GO:0000398(mRNA splicing, via spliceosome);GO:0003723(RNA binding)	03040(Spliceosome)
circRNA1529	2.7883	1.32451	2.13404	0	0	0.493239	2.08228	0.164413	up	3.66277	0.032306	yes	chr8	29238207	29264919	-	7	circRNA	-	ENSSSCT00000009593	ARAP2	mRNA	chr8:29230159-29238206|chr8:29264919-29273356	ArfGAP with RhoGAP domain, ankyrin repeat and PH domain 2 [Source:HGNC Symbol;Acc:HGNC:16924]	GO:0043547(positive regulation of GTPase activity);GO:0007165(signal transduction);GO:0005547(phosphatidylinositol-3,4,5-trisphosphate binding);GO:0005096(GTPase activator activity)	04144(Endocytosis)
circRNA4961	0.401695	0.696745	0.114885	0	0	0.700713	0.404442	0.233571	up	0.792072	0.58756	no	chr8	29309674	29310723	-	1	circRNA	-	ENSSSCT00000009593	ARAP2	mRNA	chr8:29297807-29309673|chr8:29310723-29326908	ArfGAP with RhoGAP domain, ankyrin repeat and PH domain 2 [Source:HGNC Symbol;Acc:HGNC:16924]	GO:0043547(positive regulation of GTPase activity);GO:0007165(signal transduction);GO:0005547(phosphatidylinositol-3,4,5-trisphosphate binding);GO:0005096(GTPase activator activity)	04144(Endocytosis)
circRNA1009	4.49988	5.75998	11.7172	6.60664	2.0843	3.84276	7.32568	4.1779	up	0.810184	0.304493	no	chr9	50817859	50821523	-	2	circRNA	-	ENSSSCT00000028599	ARCN1	mRNA	chr9:50816031-50817858|chr9:50821523-50822571	archain 1 [Source:HGNC Symbol;Acc:HGNC:649]	GO:0030137(COPI-coated vesicle);GO:0030126(COPI vesicle coat);GO:0016020(membrane);GO:0005794(Golgi apparatus);GO:0005783(endoplasmic reticulum);GO:0048193(Golgi vesicle transport);GO:0043473(pigmentation);GO:0021691(cerebellar Purkinje cell layer maturation);GO:0015031(protein transport);GO:0008344(adult locomotory behavior);GO:0006890(retrograde vesicle-mediated transport, Golgi to ER);GO:00068…	NA
circRNA2255	7.40056	4.03941	4.53901	1.08603	2.3927	2.70828	5.32633	2.06234	up	1.36886	0.0708412	no	chr9	50831548	50834603	-	4	circRNA	-	ENSSSCT00000028599	ARCN1	mRNA	chr9:50825216-50831547|chr9:50834603-50841873	archain 1 [Source:HGNC Symbol;Acc:HGNC:649]	GO:0030137(COPI-coated vesicle);GO:0030126(COPI vesicle coat);GO:0016020(membrane);GO:0005794(Golgi apparatus);GO:0005783(endoplasmic reticulum);GO:0048193(Golgi vesicle transport);GO:0043473(pigmentation);GO:0021691(cerebellar Purkinje cell layer maturation);GO:0015031(protein transport);GO:0008344(adult locomotory behavior);GO:0006890(retrograde vesicle-mediated transport, Golgi to ER);GO:00068…	NA
circRNA6711	3.8389	2.73839	7.55715	6.40818	9.88319	11.271	4.71148	9.18747	down	-0.963487	0.0947858	no	chr9	50821415	50825216	-	3	circRNA	-	ENSSSCT00000028599	ARCN1	mRNA	chr9:50818063-50821414|chr9:50825216-50831547	archain 1 [Source:HGNC Symbol;Acc:HGNC:649]	GO:0030137(COPI-coated vesicle);GO:0030126(COPI vesicle coat);GO:0016020(membrane);GO:0005794(Golgi apparatus);GO:0005783(endoplasmic reticulum);GO:0048193(Golgi vesicle transport);GO:0043473(pigmentation);GO:0021691(cerebellar Purkinje cell layer maturation);GO:0015031(protein transport);GO:0008344(adult locomotory behavior);GO:0006890(retrograde vesicle-mediated transport, Golgi to ER);GO:00068…	NA
circRNA2729	19.6626	13.0447	15.8297	32.1842	23.1643	16.8942	16.179	24.0809	down	-0.573767	0.209812	no	chr5	3454359	3462302	+	4	circRNA	-	ENSSSCT00000000039	ARFGAP3	mRNA	chr5:3372729-3454358|chr5:3462302-3468413	ADP ribosylation factor GTPase activating protein 3 [Source:HGNC Symbol;Acc:HGNC:661]	GO:0016020(membrane);GO:0005829(cytosol);GO:0005794(Golgi apparatus);GO:0043547(positive regulation of GTPase activity);GO:0009306(protein secretion);GO:0005096(GTPase activator activity)	04144(Endocytosis)
circRNA5471	9.3568	12.4499	9.6566	14.4885	16.2125	16.3657	10.4878	15.6889	down	-0.581038	0.0164874	no	chr5	3457119	3468473	+	4	circRNA	-	ENSSSCT00000000039	ARFGAP3	mRNA	chr5:3454431-3457118|chr5:3468473-3470324	ADP ribosylation factor GTPase activating protein 3 [Source:HGNC Symbol;Acc:HGNC:661]	GO:0016020(membrane);GO:0005829(cytosol);GO:0005794(Golgi apparatus);GO:0043547(positive regulation of GTPase activity);GO:0009306(protein secretion);GO:0005096(GTPase activator activity)	04144(Endocytosis)
circRNA63	8.15246	4.51594	4.79352	21.3851	21.9208	19.3134	5.82064	20.8731	down	-1.84239	0.000835586	yes	chr5	3457119	3458242	+	2	circRNA	-	ENSSSCT00000000039	ARFGAP3	mRNA	chr5:3454431-3457118|chr5:3458242-3462214	ADP ribosylation factor GTPase activating protein 3 [Source:HGNC Symbol;Acc:HGNC:661]	GO:0016020(membrane);GO:0005829(cytosol);GO:0005794(Golgi apparatus);GO:0043547(positive regulation of GTPase activity);GO:0009306(protein secretion);GO:0005096(GTPase activator activity)	04144(Endocytosis)
circRNA64	7.5962	6.28369	7.06536	15.4373	17.1277	15.6266	6.98175	16.0639	down	-1.20216	0.000291978	yes	chr5	3457119	3462302	+	3	circRNA	-	ENSSSCT00000000039	ARFGAP3	mRNA	chr5:3454431-3457118|chr5:3462302-3468413	ADP ribosylation factor GTPase activating protein 3 [Source:HGNC Symbol;Acc:HGNC:661]	GO:0016020(membrane);GO:0005829(cytosol);GO:0005794(Golgi apparatus);GO:0043547(positive regulation of GTPase activity);GO:0009306(protein secretion);GO:0005096(GTPase activator activity)	04144(Endocytosis)
circRNA1991	3.62134	5.59361	5.28007	0.314316	3.74387	1.82079	4.83167	1.95966	up	1.30192	0.0822175	no	chr4	73577490	73588127	+	5	circRNA	-	ENSSSCT00000006796	ARFGEF1	mRNA	chr4:73527035-73577489|chr4:73588127-73591601	ADP ribosylation factor guanine nucleotide exchange factor 1 [Source:HGNC Symbol;Acc:HGNC:15772]	GO:0048471(perinuclear region of cytoplasm);GO:0030532(small nuclear ribonucleoprotein complex);GO:0005829(cytosol);GO:0005802(trans-Golgi network);GO:0005794(Golgi apparatus);GO:0005730(nucleolus);GO:0005654(nucleoplasm);GO:0000139(Golgi membrane);GO:2000114(regulation of establishment of cell polarity);GO:0090303(positive regulation of wound healing);GO:0090284(positive regulation of protein gl…	04144(Endocytosis)
circRNA3805	5.17021	4.71989	1.55651	0	0	1.42403	3.81553	0.474676	up	3.00687	0.0827586	no	chr4	73597912	73599445	+	2	circRNA	-	ENSSSCT00000006796	ARFGEF1	mRNA	chr4:73591712-73597911|chr4:73599445-73604268	ADP ribosylation factor guanine nucleotide exchange factor 1 [Source:HGNC Symbol;Acc:HGNC:15772]	GO:0048471(perinuclear region of cytoplasm);GO:0030532(small nuclear ribonucleoprotein complex);GO:0005829(cytosol);GO:0005802(trans-Golgi network);GO:0005794(Golgi apparatus);GO:0005730(nucleolus);GO:0005654(nucleoplasm);GO:0000139(Golgi membrane);GO:2000114(regulation of establishment of cell polarity);GO:0090303(positive regulation of wound healing);GO:0090284(positive regulation of protein gl…	04144(Endocytosis)
circRNA5928	2.02223	0.41757	3.44262	1.04198	4.02525	0	1.96081	1.68908	up	0.215212	0.864927	no	chr4	73643369	73644621	+	2	circRNA	-	ENSSSCT00000006796	ARFGEF1	mRNA	chr4:73642085-73643368|chr4:73644621-73648053	ADP ribosylation factor guanine nucleotide exchange factor 1 [Source:HGNC Symbol;Acc:HGNC:15772]	GO:0048471(perinuclear region of cytoplasm);GO:0030532(small nuclear ribonucleoprotein complex);GO:0005829(cytosol);GO:0005802(trans-Golgi network);GO:0005794(Golgi apparatus);GO:0005730(nucleolus);GO:0005654(nucleoplasm);GO:0000139(Golgi membrane);GO:2000114(regulation of establishment of cell polarity);GO:0090303(positive regulation of wound healing);GO:0090284(positive regulation of protein gl…	04144(Endocytosis)
circRNA1718	8.38952	7.21361	7.7396	1.97316	1.47643	1.35234	7.78091	1.60064	up	2.28129	0.000423955	yes	chr17	57028111	57046105	+	11	circRNA	-	ENSSSCT00000008164	ARFGEF2	mRNA	chr17:57025733-57028110|chr17:57046105-57049038	ADP ribosylation factor guanine nucleotide exchange factor 2 [Source:HGNC Symbol;Acc:HGNC:15853]	GO:0055037(recycling endosome);GO:0016020(membrane);GO:0005829(cytosol);GO:0005815(microtubule organizing center);GO:0005802(trans-Golgi network);GO:0000139(Golgi membrane);GO:0043547(positive regulation of GTPase activity);GO:0035556(intracellular signal transduction);GO:0032760(positive regulation of tumor necrosis factor production);GO:0032012(regulation of ARF protein signal transduction);GO:…	04144(Endocytosis)
circRNA6883	9.95272	8.81645	7.14954	1.83458	1.4992	0.593103	8.63957	1.30896	up	2.72254	0.00490984	yes	chr17	57032212	57062606	+	14	circRNA	-	ENSSSCT00000008164	ARFGEF2	mRNA	chr17:57029084-57032211|chr17:57062606-57064794	ADP ribosylation factor guanine nucleotide exchange factor 2 [Source:HGNC Symbol;Acc:HGNC:15853]	GO:0055037(recycling endosome);GO:0016020(membrane);GO:0005829(cytosol);GO:0005815(microtubule organizing center);GO:0005802(trans-Golgi network);GO:0000139(Golgi membrane);GO:0043547(positive regulation of GTPase activity);GO:0035556(intracellular signal transduction);GO:0032760(positive regulation of tumor necrosis factor production);GO:0032012(regulation of ARF protein signal transduction);GO:…	04144(Endocytosis)
circRNA4062	3.82001	3.04218	3.94272	0.66251	0.259932	0.220284	3.60164	0.380909	up	3.24114	0.00216817	yes	chr8	80764338	80784852	-	4	circRNA	-	ENSSSCT00000009867	ARFIP1	mRNA	chr8:80739360-80764337|chr8:80784852-80786313	ADP-ribosylation factor interacting protein 1 [Source:RefSeq peptide;Acc:NP_001239162]	GO:0032588(trans-Golgi network membrane);GO:0005829(cytosol);GO:0005737(cytoplasm);GO:0000139(Golgi membrane);GO:0050708(regulation of protein secretion);GO:0034315(regulation of Arp2/3 complex-mediated actin nucleation);GO:0006886(intracellular protein transport);GO:0070273(phosphatidylinositol-4-phosphate binding);GO:0045296(cadherin binding);GO:0019904(protein domain specific binding)	NA
circRNA4983	3.67125	4.30906	4.02624	0.579263	0.576917	0.192604	4.00218	0.449595	up	3.15409	0.000196517	yes	chr8	80764338	80786409	-	5	circRNA	-	ENSSSCT00000009867	ARFIP1	mRNA	chr8:80739360-80764337|chr8:80786409-80791454	ADP-ribosylation factor interacting protein 1 [Source:RefSeq peptide;Acc:NP_001239162]	GO:0032588(trans-Golgi network membrane);GO:0005829(cytosol);GO:0005737(cytoplasm);GO:0000139(Golgi membrane);GO:0050708(regulation of protein secretion);GO:0034315(regulation of Arp2/3 complex-mediated actin nucleation);GO:0006886(intracellular protein transport);GO:0070273(phosphatidylinositol-4-phosphate binding);GO:0045296(cadherin binding);GO:0019904(protein domain specific binding)	NA
circRNA2977	3.19901	7.11752	3.54506	0.567895	0.61298	1.56391	4.62053	0.914928	up	2.33633	0.0894603	no	chr10	47097358	47105223	-	2	circRNA	-	ENSSSCT00000012068	ARHGAP12	mRNA	chr10:47093826-47097357|chr10:47105223-47106426	Rho GTPase activating protein 12 [Source:HGNC Symbol;Acc:HGNC:16348]	GO:0007165(signal transduction);GO:0002011(morphogenesis of an epithelial sheet)	NA
circRNA428	10.9751	17.755	11.914	5.32576	0.710318	1.20179	13.548	2.41262	up	2.48941	0.0160574	yes	chr10	47067162	47086534	-	4	circRNA	-	ENSSSCT00000012068	ARHGAP12	mRNA	chr10:47064251-47067161|chr10:47086534-47093409	Rho GTPase activating protein 12 [Source:HGNC Symbol;Acc:HGNC:16348]	GO:0007165(signal transduction);GO:0002011(morphogenesis of an epithelial sheet)	NA
circRNA429	8.31188	13.9475	9.9117	0.553196	0.253774	1.73637	10.7237	0.847779	up	3.66097	0.0215373	yes	chr10	47086473	47106567	-	6	circRNA	-	ENSSSCT00000012068	ARHGAP12	mRNA	chr10:47075999-47086472|chr10:47106567-47114184	Rho GTPase activating protein 12 [Source:HGNC Symbol;Acc:HGNC:16348]	GO:0007165(signal transduction);GO:0002011(morphogenesis of an epithelial sheet)	NA
circRNA5717	12.48	18.9341	13.6837	4.36119	0.872782	1.51255	15.0326	2.24884	up	2.74084	0.0101065	yes	chr10	47064149	47086534	-	5	circRNA	-	ENSSSCT00000012068	ARHGAP12	mRNA	chr10:47062323-47064148|chr10:47086534-47093409	Rho GTPase activating protein 12 [Source:HGNC Symbol;Acc:HGNC:16348]	GO:0007165(signal transduction);GO:0002011(morphogenesis of an epithelial sheet)	NA
circRNA5718	2.36746	4.31156	2.1087	0.337799	0.364617	0.930257	2.92924	0.544224	up	2.42825	0.0662637	no	chr10	47097358	47106567	-	3	circRNA	-	ENSSSCT00000012068	ARHGAP12	mRNA	chr10:47093826-47097357|chr10:47106567-47114184	Rho GTPase activating protein 12 [Source:HGNC Symbol;Acc:HGNC:16348]	GO:0007165(signal transduction);GO:0002011(morphogenesis of an epithelial sheet)	NA
circRNA802	15.5092	24.02	16.6678	3.66509	0.728388	2.26315	18.7323	2.21888	up	3.07763	0.0176095	yes	chr10	47064149	47093826	-	7	circRNA	-	ENSSSCT00000012068	ARHGAP12	mRNA	chr10:47062323-47064148|chr10:47093826-47097357	Rho GTPase activating protein 12 [Source:HGNC Symbol;Acc:HGNC:16348]	GO:0007165(signal transduction);GO:0002011(morphogenesis of an epithelial sheet)	NA
circRNA803	23.2622	22.1757	15.3907	0.237278	4.04842	1.00985	20.2762	1.76518	up	3.5219	0.00765269	yes	chr10	47097358	47114448	-	4	circRNA	-	ENSSSCT00000012068	ARHGAP12	mRNA	chr10:47093826-47097357|chr10:47114448-47148476	Rho GTPase activating protein 12 [Source:HGNC Symbol;Acc:HGNC:16348]	GO:0007165(signal transduction);GO:0002011(morphogenesis of an epithelial sheet)	NA
circRNA2983	3.90918	12.2922	3.72676	0	5.2123	1.72273	6.6427	2.31167	up	1.52283	0.268305	no	chr10	56044657	56048013	+	2	circRNA	-	ENSSSCT00000012118	ARHGAP21	mRNA	chr10:56044610-56044656|chr10:56048013-56065295	Rho GTPase activating protein 21 [Source:HGNC Symbol;Acc:HGNC:23725]	GO:0043547(positive regulation of GTPase activity);GO:0007165(signal transduction);GO:0005096(GTPase activator activity);GO:0030054(cell junction);GO:0015629(actin cytoskeleton);GO:0005886(plasma membrane);GO:0005794(Golgi apparatus);GO:0072384(organelle transport along microtubule);GO:0051684(maintenance of Golgi location);GO:0051683(establishment of Golgi localization);GO:0051645(Golgi localiza…	NA
circRNA432	18.8352	4.65383	5.06459	1.68915	6.11749	7.6383	9.51788	5.14831	up	0.88654	0.455222	no	chr10	56100870	56101271	+	2	circRNA	-	ENSSSCT00000012118	ARHGAP21	mRNA	chr10:56092707-56100869|chr10:56101271-56105133	Rho GTPase activating protein 21 [Source:HGNC Symbol;Acc:HGNC:23725]	GO:0043547(positive regulation of GTPase activity);GO:0007165(signal transduction);GO:0005096(GTPase activator activity);GO:0030054(cell junction);GO:0015629(actin cytoskeleton);GO:0005886(plasma membrane);GO:0005794(Golgi apparatus);GO:0072384(organelle transport along microtubule);GO:0051684(maintenance of Golgi location);GO:0051683(establishment of Golgi localization);GO:0051645(Golgi localiza…	NA
circRNA5187	0.257183	3.46956	3.06477	4.72241	7.65556	1.16643	2.26384	4.5148	down	-0.995891	0.366737	no	chr10	56118392	56118632	+	2	circRNA	-	ENSSSCT00000012118	ARHGAP21	mRNA	chr10:56117374-56118391|chr10:56118632-56120485	Rho GTPase activating protein 21 [Source:HGNC Symbol;Acc:HGNC:23725]	GO:0043547(positive regulation of GTPase activity);GO:0007165(signal transduction);GO:0005096(GTPase activator activity);GO:0030054(cell junction);GO:0015629(actin cytoskeleton);GO:0005886(plasma membrane);GO:0005794(Golgi apparatus);GO:0072384(organelle transport along microtubule);GO:0051684(maintenance of Golgi location);GO:0051683(establishment of Golgi localization);GO:0051645(Golgi localiza…	NA
circRNA5188	1.36688	9.59638	5.1193	15.2385	4.08116	5.10936	5.36085	8.14301	down	-0.6031	0.556108	no	chr10	56118543	56120611	+	2	circRNA	-	ENSSSCT00000012118	ARHGAP21	mRNA	chr10:56118465-56118542|chr10:56120611-56120805	Rho GTPase activating protein 21 [Source:HGNC Symbol;Acc:HGNC:23725]	GO:0043547(positive regulation of GTPase activity);GO:0007165(signal transduction);GO:0005096(GTPase activator activity);GO:0030054(cell junction);GO:0015629(actin cytoskeleton);GO:0005886(plasma membrane);GO:0005794(Golgi apparatus);GO:0072384(organelle transport along microtubule);GO:0051684(maintenance of Golgi location);GO:0051683(establishment of Golgi localization);GO:0051645(Golgi localiza…	NA
circRNA2721	1.14436	4.09585	0.311704	0	0.621233	0	1.85064	0.207078	up	3.15978	0.287121	no	chr6	93691199	93691550	-	2	circRNA	-	ENSSSCT00000004084	ARHGAP28	mRNA	chr6:93688451-93691198|chr6:93691550-93694518	Rho GTPase activating protein 28 [Source:HGNC Symbol;Acc:HGNC:25509]	GO:1904425(negative regulation of GTP binding);GO:0051497(negative regulation of stress fiber assembly);GO:0007165(signal transduction)	NA
circRNA47	14.8756	9.72062	6.89907	2.92417	2.10649	1.50465	10.4984	2.17844	up	2.26881	0.0664313	no	chr6	93665972	93677523	-	5	circRNA	-	ENSSSCT00000004084	ARHGAP28	mRNA	chr6:93662563-93665971|chr6:93677523-93682846	Rho GTPase activating protein 28 [Source:HGNC Symbol;Acc:HGNC:25509]	GO:1904425(negative regulation of GTP binding);GO:0051497(negative regulation of stress fiber assembly);GO:0007165(signal transduction)	NA
circRNA895	5.60594	1.44053	1.22156	1.33047	1.31874	2.19793	2.75601	1.61572	up	0.770407	0.509967	no	chr6	93673917	93677523	-	3	circRNA	-	ENSSSCT00000004084	ARHGAP28	mRNA	chr6:93667876-93673916|chr6:93677523-93682846	Rho GTPase activating protein 28 [Source:HGNC Symbol;Acc:HGNC:25509]	GO:1904425(negative regulation of GTP binding);GO:0051497(negative regulation of stress fiber assembly);GO:0007165(signal transduction)	NA
circRNA4023	4.46973	3.8764	2.44048	6.04892	2.03307	0.11341	3.59554	2.7318	up	0.396355	0.678559	no	chr9	62138265	62157733	-	5	circRNA	-	ENSSSCT00000016605	ARHGAP32	mRNA	chr9:62121038-62138264|chr9:62157733-62188101	Rho GTPase activating protein 32 [Source:HGNC Symbol;Acc:HGNC:17399]	GO:0015629(actin cytoskeleton);GO:0005938(cell cortex);GO:0005794(Golgi apparatus);GO:0005654(nucleoplasm);GO:0001650(fibrillar center);GO:0043547(positive regulation of GTPase activity);GO:0007264(small GTPase mediated signal transduction);GO:0007165(signal transduction);GO:0035091(phosphatidylinositol binding);GO:0005096(GTPase activator activity)	NA
circRNA4907	6.00755	3.1357	26.8264	0.0820766	1.42681	3.49317	11.9899	1.66735	up	2.84619	0.300092	no	chr9	62065618	62074091	-	3	circRNA	-	ENSSSCT00000016605	ARHGAP32	mRNA	chr9:62064381-62065617|chr9:62074091-62074794	Rho GTPase activating protein 32 [Source:HGNC Symbol;Acc:HGNC:17399]	GO:0015629(actin cytoskeleton);GO:0005938(cell cortex);GO:0005794(Golgi apparatus);GO:0005654(nucleoplasm);GO:0001650(fibrillar center);GO:0043547(positive regulation of GTPase activity);GO:0007264(small GTPase mediated signal transduction);GO:0007165(signal transduction);GO:0035091(phosphatidylinositol binding);GO:0005096(GTPase activator activity)	NA
circRNA5631	1.75742	0.940821	0.698086	7.2671	2.44251	0.13625	1.13211	3.28195	down	-1.53554	0.414132	no	chr9	62138265	62143849	-	4	circRNA	-	ENSSSCT00000016605	ARHGAP32	mRNA	chr9:62121038-62138264|chr9:62143849-62157646	Rho GTPase activating protein 32 [Source:HGNC Symbol;Acc:HGNC:17399]	GO:0015629(actin cytoskeleton);GO:0005938(cell cortex);GO:0005794(Golgi apparatus);GO:0005654(nucleoplasm);GO:0001650(fibrillar center);GO:0043547(positive regulation of GTPase activity);GO:0007264(small GTPase mediated signal transduction);GO:0007165(signal transduction);GO:0035091(phosphatidylinositol binding);GO:0005096(GTPase activator activity)	NA
circRNA534	6.42446	5.96643	7.58926	2.38131	2.06392	0.519734	6.66005	1.65499	up	2.00871	0.00292028	yes	chrX	8578423	8581627	-	2	circRNA	-	ENSSSCT00000035835	ARHGAP6	mRNA	chrX:8568838-8578422|chrX:8581627-8590321	Rho GTPase activating protein 6 [Source:HGNC Symbol;Acc:HGNC:676]	GO:0015629(actin cytoskeleton);GO:0005737(cytoplasm);GO:0051895(negative regulation of focal adhesion assembly);GO:0051497(negative regulation of stress fiber assembly);GO:0048041(focal adhesion assembly);GO:0043547(positive regulation of GTPase activity);GO:0043087(regulation of GTPase activity);GO:0007165(signal transduction);GO:0007015(actin filament organization);GO:0005096(GTPase activator a…	NA
circRNA6386	25.4177	19.2533	19.7796	2.57301	3.13318	1.48786	21.4835	2.39801	up	3.16332	0.00765633	yes	chrX	8558016	8581627	-	6	circRNA	-	ENSSSCT00000035835	ARHGAP6	mRNA	chrX:8544051-8558015|chrX:8581627-8590321	Rho GTPase activating protein 6 [Source:HGNC Symbol;Acc:HGNC:676]	GO:0015629(actin cytoskeleton);GO:0005737(cytoplasm);GO:0051895(negative regulation of focal adhesion assembly);GO:0051497(negative regulation of stress fiber assembly);GO:0048041(focal adhesion assembly);GO:0043547(positive regulation of GTPase activity);GO:0043087(regulation of GTPase activity);GO:0007165(signal transduction);GO:0007015(actin filament organization);GO:0005096(GTPase activator a…	NA
circRNA4903	2.63613	2.16389	2.79234	1.02444	0.927535	3.54249	2.53079	1.83149	up	0.466569	0.502174	no	chr9	52673623	52677558	+	2	circRNA	-	ENSSSCT00000016495	ARHGEF12	mRNA	chr9:52671892-52673622|chr9:52677558-52686336	Rho guanine nucleotide exchange factor 12 [Source:HGNC Symbol;Acc:HGNC:14193]	GO:0070062(extracellular exosome);GO:0005737(cytoplasm);GO:0043547(positive regulation of GTPase activity);GO:0035556(intracellular signal transduction);GO:0035023(regulation of Rho protein signal transduction);GO:0007186(G-protein coupled receptor signaling pathway);GO:0005089(Rho guanyl-nucleotide exchange factor activity);GO:0005085(guanyl-nucleotide exchange factor activity);GO:0001664(G-prot…	04810(Regulation of actin cytoskeleton);04611(Platelet activation);04270(Vascular smooth muscle contraction);04360(Axon guidance);05200(Pathways in cancer);05205(Proteoglycans in cancer);05152(Tuberculosis)
circRNA4904	10.131	5.08043	2.75949	1.35587	1.24399	0.793454	5.99031	1.13111	up	2.4049	0.154363	no	chr9	52686337	52688431	+	2	circRNA	-	ENSSSCT00000016495	ARHGEF12	mRNA	chr9:52677558-52686336|chr9:52688431-52688728	Rho guanine nucleotide exchange factor 12 [Source:HGNC Symbol;Acc:HGNC:14193]	GO:0070062(extracellular exosome);GO:0005737(cytoplasm);GO:0043547(positive regulation of GTPase activity);GO:0035556(intracellular signal transduction);GO:0035023(regulation of Rho protein signal transduction);GO:0007186(G-protein coupled receptor signaling pathway);GO:0005089(Rho guanyl-nucleotide exchange factor activity);GO:0005085(guanyl-nucleotide exchange factor activity);GO:0001664(G-prot…	04810(Regulation of actin cytoskeleton);04611(Platelet activation);04270(Vascular smooth muscle contraction);04360(Axon guidance);05200(Pathways in cancer);05205(Proteoglycans in cancer);05152(Tuberculosis)
circRNA5630	5.52819	7.23427	10.4103	0.89514	3.2851	3.00014	7.72425	2.39346	up	1.6903	0.0451601	yes	chr9	52673623	52686429	+	3	circRNA	-	ENSSSCT00000016495	ARHGEF12	mRNA	chr9:52671892-52673622|chr9:52686429-52688320	Rho guanine nucleotide exchange factor 12 [Source:HGNC Symbol;Acc:HGNC:14193]	GO:0070062(extracellular exosome);GO:0005737(cytoplasm);GO:0043547(positive regulation of GTPase activity);GO:0035556(intracellular signal transduction);GO:0035023(regulation of Rho protein signal transduction);GO:0007186(G-protein coupled receptor signaling pathway);GO:0005089(Rho guanyl-nucleotide exchange factor activity);GO:0005085(guanyl-nucleotide exchange factor activity);GO:0001664(G-prot…	04810(Regulation of actin cytoskeleton);04611(Platelet activation);04270(Vascular smooth muscle contraction);04360(Axon guidance);05200(Pathways in cancer);05205(Proteoglycans in cancer);05152(Tuberculosis)
circRNA2381	0	0.571549	0	2.89564	0.959999	0	0.190516	1.28521	down	-2.75402	0.326484	no	chr13	102287901	102304005	+	3	circRNA	-	ENSSSCT00000030324	ARHGEF26	mRNA	chr13:102283890-102287900|chr13:102304005-102324128	Rho guanine nucleotide exchange factor 26 [Source:HGNC Symbol;Acc:HGNC:24490]	GO:0097178(ruffle assembly);GO:0043547(positive regulation of GTPase activity);GO:0035023(regulation of Rho protein signal transduction);GO:0001886(endothelial cell morphogenesis);GO:0005089(Rho guanyl-nucleotide exchange factor activity)	05100(Bacterial invasion of epithelial cells)
circRNA3469	0	1.41869	0.0758675	4.09678	0.579622	0.0555282	0.498185	1.57731	down	-1.66271	0.492496	no	chr13	102287901	102324338	+	4	circRNA	-	ENSSSCT00000030324	ARHGEF26	mRNA	chr13:102283890-102287900|chr13:102324338-102346943	Rho guanine nucleotide exchange factor 26 [Source:HGNC Symbol;Acc:HGNC:24490]	GO:0097178(ruffle assembly);GO:0043547(positive regulation of GTPase activity);GO:0035023(regulation of Rho protein signal transduction);GO:0001886(endothelial cell morphogenesis);GO:0005089(Rho guanyl-nucleotide exchange factor activity)	05100(Bacterial invasion of epithelial cells)
ciRNA149	0	0.516654	3.74837	14.2987	5.09358	2.86817	1.42167	7.42016	down	-2.38386	0.222637	no	chr1	264111965	264112200	-	1	ciRNA	-	ENSSSCT00000005852	ARHGEF39	mRNA	chr1:264111930-264112200	Rho guanine nucleotide exchange factor 39 [Source:HGNC Symbol;Acc:HGNC:25909]	GO:0005886(plasma membrane);GO:0043547(positive regulation of GTPase activity);GO:0035023(regulation of Rho protein signal transduction);GO:0030335(positive regulation of cell migration);GO:0005089(Rho guanyl-nucleotide exchange factor activity)	NA
circRNA6079	0.183383	0	0	0	3.25202	2.68708	0.0611275	1.9797	down	-5.01732	0.195545	no	chr1	264110036	264110265	-	1	circRNA	-	ENSSSCT00000005852	ARHGEF39	mRNA	chr1:264109782-264110035|chr1:264110265-264110428	Rho guanine nucleotide exchange factor 39 [Source:HGNC Symbol;Acc:HGNC:25909]	GO:0005886(plasma membrane);GO:0043547(positive regulation of GTPase activity);GO:0035023(regulation of Rho protein signal transduction);GO:0030335(positive regulation of cell migration);GO:0005089(Rho guanyl-nucleotide exchange factor activity)	NA
circRNA5905	11.1206	6.37166	8.21387	0	3.42637	0.908763	8.5687	1.44505	up	2.56796	0.0169767	yes	chr5	79656879	79666579	+	3	circRNA	-	ENSSSCT00000030858	ARID2	mRNA	chr5:79566603-79656878|chr5:79666579-79676711	AT-rich interaction domain 2 [Source:HGNC Symbol;Acc:HGNC:18037]	GO:0090544(BAF-type complex);GO:0005886(plasma membrane);GO:0005654(nucleoplasm);GO:0072358(cardiovascular system development);GO:0060982(coronary artery morphogenesis);GO:0060038(cardiac muscle cell proliferation);GO:0048568(embryonic organ development);GO:0042592(homeostatic process);GO:0030336(negative regulation of cell migration);GO:0008285(negative regulation of cell proliferation);GO:00063…	NA
circRNA5906	8.1139	6.24578	9.26869	0.867299	1.04136	2.14489	7.87612	1.35118	up	2.54326	0.00832346	yes	chr5	79698894	79718761	+	5	circRNA	-	ENSSSCT00000030858	ARID2	mRNA	chr5:79690963-79698893|chr5:79718761-79724380	AT-rich interaction domain 2 [Source:HGNC Symbol;Acc:HGNC:18037]	GO:0090544(BAF-type complex);GO:0005886(plasma membrane);GO:0005654(nucleoplasm);GO:0072358(cardiovascular system development);GO:0060982(coronary artery morphogenesis);GO:0060038(cardiac muscle cell proliferation);GO:0048568(embryonic organ development);GO:0042592(homeostatic process);GO:0030336(negative regulation of cell migration);GO:0008285(negative regulation of cell proliferation);GO:00063…	NA
circRNA80	1.96066	2.07365	0.820607	1.03489	0.96918	2.46918	1.6183	1.49108	up	0.118121	0.850701	no	chr5	79715412	79718761	+	4	circRNA	-	ENSSSCT00000030858	ARID2	mRNA	chr5:79699042-79715411|chr5:79718761-79724380	AT-rich interaction domain 2 [Source:HGNC Symbol;Acc:HGNC:18037]	GO:0090544(BAF-type complex);GO:0005886(plasma membrane);GO:0005654(nucleoplasm);GO:0072358(cardiovascular system development);GO:0060982(coronary artery morphogenesis);GO:0060038(cardiac muscle cell proliferation);GO:0048568(embryonic organ development);GO:0042592(homeostatic process);GO:0030336(negative regulation of cell migration);GO:0008285(negative regulation of cell proliferation);GO:00063…	NA
circRNA3260	8.41346	7.78733	5.91009	9.36513	11.9192	10.3507	7.3703	10.545	down	-0.516765	0.0398902	no	chr2	77563721	77564721	+	2	circRNA	-	ENSSSCT00000014658	ARID3A	mRNA	chr2:77560772-77563720|chr2:77564721-77565662	AT-rich interaction domain 3A [Source:HGNC Symbol;Acc:HGNC:3031]	GO:0045121(membrane raft);GO:0043231(intracellular membrane-bounded organelle);GO:0005829(cytosol);GO:0005654(nucleoplasm);GO:0005634(nucleus);GO:0045944(positive regulation of transcription from RNA polymerase II promoter);GO:0006366(transcription from RNA polymerase II promoter);GO:0006355(regulation of transcription, DNA-templated);GO:0042803(protein homodimerization activity);GO:0003700(trans…	NA
circRNA6004	5.8336	5.30317	7.68099	6.26532	2.76053	4.1165	6.27258	4.38079	up	0.51787	0.21221	no	chr2	77536380	77538601	+	2	circRNA	-	ENSSSCT00000014658	ARID3A	mRNA	chr2:77532880-77536379|chr2:77538601-77556812	AT-rich interaction domain 3A [Source:HGNC Symbol;Acc:HGNC:3031]	GO:0045121(membrane raft);GO:0043231(intracellular membrane-bounded organelle);GO:0005829(cytosol);GO:0005654(nucleoplasm);GO:0005634(nucleus);GO:0045944(positive regulation of transcription from RNA polymerase II promoter);GO:0006366(transcription from RNA polymerase II promoter);GO:0006355(regulation of transcription, DNA-templated);GO:0042803(protein homodimerization activity);GO:0003700(trans…	NA
circRNA239	1.41643	1.6682	1.20029	3.30266	2.2427	4.83178	1.42831	3.45905	down	-1.27607	0.109672	no	chr1	208292449	208295366	+	3	circRNA	-	ENSSSCT00000005590	ARID4A	mRNA	chr1:208290312-208292448|chr1:208295366-208304838	AT-rich interaction domain 4A [Source:HGNC Symbol;Acc:HGNC:9885]	GO:0017053(transcriptional repressor complex);GO:0005886(plasma membrane);GO:0005829(cytosol);GO:0005654(nucleoplasm);GO:0005634(nucleus);GO:0097368(establishment of Sertoli cell barrier);GO:0080182(histone H3-K4 trimethylation);GO:0048821(erythrocyte development);GO:0045944(positive regulation of transcription from RNA polymerase II promoter);GO:0045892(negative regulation of transcription, DNA-…	NA
circRNA696	4.3502	3.4629	8.29439	9.05456	1.82679	5.08095	5.36916	5.32077	up	0.0130627	0.985936	no	chr1	208292449	208305105	+	5	circRNA	-	ENSSSCT00000005590	ARID4A	mRNA	chr1:208290312-208292448|chr1:208305105-208307044	AT-rich interaction domain 4A [Source:HGNC Symbol;Acc:HGNC:9885]	GO:0017053(transcriptional repressor complex);GO:0005886(plasma membrane);GO:0005829(cytosol);GO:0005654(nucleoplasm);GO:0005634(nucleus);GO:0097368(establishment of Sertoli cell barrier);GO:0080182(histone H3-K4 trimethylation);GO:0048821(erythrocyte development);GO:0045944(positive regulation of transcription from RNA polymerase II promoter);GO:0045892(negative regulation of transcription, DNA-…	NA
circRNA3638	2.99023	5.45957	5.17626	1.3073	4.25282	1.20795	4.54202	2.25602	up	1.00955	0.149801	no	chr14	60090378	60097770	+	3	circRNA	-	ENSSSCT00000011120	ARID4B	mRNA	None|chr14:60097770-60101239	AT-rich interaction domain 4B [Source:HGNC Symbol;Acc:HGNC:15550]	GO:0005634(nucleus);GO:0097368(establishment of Sertoli cell barrier);GO:0045944(positive regulation of transcription from RNA polymerase II promoter);GO:0036124(histone H3-K9 trimethylation);GO:0034773(histone H4-K20 trimethylation);GO:0007283(spermatogenesis);GO:0006357(regulation of transcription from RNA polymerase II promoter);GO:0006355(regulation of transcription, DNA-templated);GO:0006349…	NA
circRNA6363	4.24988	6.33605	6.11555	4.48727	2.60697	3.86058	5.56716	3.65161	up	0.60841	0.0925812	no	chr14	60097680	60107836	+	3	circRNA	-	ENSSSCT00000011120	ARID4B	mRNA	chr14:60093320-60097679|chr14:60107836-60119757	AT-rich interaction domain 4B [Source:HGNC Symbol;Acc:HGNC:15550]	GO:0005634(nucleus);GO:0097368(establishment of Sertoli cell barrier);GO:0045944(positive regulation of transcription from RNA polymerase II promoter);GO:0036124(histone H3-K9 trimethylation);GO:0034773(histone H4-K20 trimethylation);GO:0007283(spermatogenesis);GO:0006357(regulation of transcription from RNA polymerase II promoter);GO:0006355(regulation of transcription, DNA-templated);GO:0006349…	NA
circRNA6938	4.36159	6.83549	6.62547	3.37366	3.80458	2.77578	5.94085	3.31801	up	0.840353	0.0658771	no	chr14	60090378	60107836	+	5	circRNA	-	ENSSSCT00000011120	ARID4B	mRNA	None|chr14:60107836-60119757	AT-rich interaction domain 4B [Source:HGNC Symbol;Acc:HGNC:15550]	GO:0005634(nucleus);GO:0097368(establishment of Sertoli cell barrier);GO:0045944(positive regulation of transcription from RNA polymerase II promoter);GO:0036124(histone H3-K9 trimethylation);GO:0034773(histone H4-K20 trimethylation);GO:0007283(spermatogenesis);GO:0006357(regulation of transcription from RNA polymerase II promoter);GO:0006355(regulation of transcription, DNA-templated);GO:0006349…	NA
circRNA1591	10.2837	6.60636	7.67253	4.93576	5.75793	3.06778	8.18752	4.58716	up	0.835827	0.0616982	no	chr13	34853744	34859202	+	3	circRNA	-	ENSSSCT00000012445	ARIH2	mRNA	chr13:34827287-34853743|chr13:34859202-34860538	ariadne RBR E3 ubiquitin protein ligase 2 [Source:HGNC Symbol;Acc:HGNC:690]	GO:0031466(Cul5-RING ubiquitin ligase complex);GO:0005737(cytoplasm);GO:0005654(nucleoplasm);GO:0005634(nucleus);GO:0000151(ubiquitin ligase complex);GO:1903955(positive regulation of protein targeting to mitochondrion);GO:0071425(hematopoietic stem cell proliferation);GO:0070936(protein K48-linked ubiquitination);GO:0070534(protein K63-linked ubiquitination);GO:0048588(developmental cell growth)…	NA
circRNA339	5.8853	4.34791	6.91982	6.49684	6.95781	4.03806	5.71768	5.8309	down	-0.0282907	0.927998	no	chr13	34856835	34859202	+	2	circRNA	-	ENSSSCT00000012445	ARIH2	mRNA	chr13:34853811-34856834|chr13:34859202-34860538	ariadne RBR E3 ubiquitin protein ligase 2 [Source:HGNC Symbol;Acc:HGNC:690]	GO:0031466(Cul5-RING ubiquitin ligase complex);GO:0005737(cytoplasm);GO:0005654(nucleoplasm);GO:0005634(nucleus);GO:0000151(ubiquitin ligase complex);GO:1903955(positive regulation of protein targeting to mitochondrion);GO:0071425(hematopoietic stem cell proliferation);GO:0070936(protein K48-linked ubiquitination);GO:0070534(protein K63-linked ubiquitination);GO:0048588(developmental cell growth)…	NA
circRNA3806	5.18721	6.42429	3.50214	3.12288	0.517026	1.7207	5.03788	1.78687	up	1.49538	0.0462581	yes	chr4	75145634	75154660	+	3	circRNA	-	ENSSSCT00000006816	ARMC1	mRNA	chr4:75142111-75145633|chr4:75154660-75166073	armadillo repeat-containing protein 1 [Source:RefSeq peptide;Acc:NP_001177125]	GO:0005739(mitochondrion);GO:0005737(cytoplasm);GO:0005634(nucleus);GO:0030001(metal ion transport);GO:0046872(metal ion binding)	NA
circRNA3807	6.13226	3.60314	8.1275	2.35403	0	0	5.9543	0.784676	up	2.92376	0.037572	yes	chr4	75154569	75166263	+	2	circRNA	-	ENSSSCT00000006816	ARMC1	mRNA	chr4:75145853-75154568|chr4:75166263-75171523	armadillo repeat-containing protein 1 [Source:RefSeq peptide;Acc:NP_001177125]	GO:0005739(mitochondrion);GO:0005737(cytoplasm);GO:0005634(nucleus);GO:0030001(metal ion transport);GO:0046872(metal ion binding)	NA
circRNA3296	0	1.61451	0	0	0	1.82984	0.538169	0.609947	down	-0.180624	0.933989	no	chr1	84258390	84258582	+	1	circRNA	-	ENSSSCT00000004851	ARMC2	mRNA	chr1:84250549-84258389|chr1:84258582-84274369	armadillo repeat containing 2 [Source:HGNC Symbol;Acc:HGNC:23045]	NA	NA
circRNA4746	3.28856	3.14953	3.27891	1.30583	0.420377	3.03141	3.239	1.58587	up	1.03027	0.16336	no	chr1	84240783	84258582	+	4	circRNA	-	ENSSSCT00000004851	ARMC2	mRNA	chr1:84234470-84240782|chr1:84258582-84274369	armadillo repeat containing 2 [Source:HGNC Symbol;Acc:HGNC:23045]	NA	NA
circRNA674	0.982228	1.57749	0.991473	0	0	2.33827	1.18373	0.779423	up	0.602861	0.659904	no	chr1	84250378	84258582	+	2	circRNA	-	ENSSSCT00000004851	ARMC2	mRNA	chr1:84241711-84250377|chr1:84258582-84274369	armadillo repeat containing 2 [Source:HGNC Symbol;Acc:HGNC:23045]	NA	NA
circRNA2513	0.49235	2.00318	3.52031	2.90589	4.15767	1.7177	2.00528	2.92709	down	-0.545663	0.45964	no	chr17	6311352	6317255	-	3	circRNA	-	ENSSSCT00000007660	ASAH1	mRNA	chr17:6308084-6311351|chr17:6317255-6320752	N-acylsphingosine amidohydrolase 1 [Source:HGNC Symbol;Acc:HGNC:735]	GO:0070062(extracellular exosome);GO:0005764(lysosome);GO:0005615(extracellular space);GO:0006629(lipid metabolic process);GO:0017040(ceramidase activity)	00600(Sphingolipid metabolism);04071(Sphingolipid signaling pathway);04142(Lysosome)
circRNA6272	0	2.74001	3.04962	0	5.25256	0.826684	1.92988	2.02641	down	-0.0704219	0.962373	no	chr17	6316325	6317255	-	2	circRNA	-	ENSSSCT00000007660	ASAH1	mRNA	chr17:6311430-6316324|chr17:6317255-6320752	N-acylsphingosine amidohydrolase 1 [Source:HGNC Symbol;Acc:HGNC:735]	GO:0070062(extracellular exosome);GO:0005764(lysosome);GO:0005615(extracellular space);GO:0006629(lipid metabolic process);GO:0017040(ceramidase activity)	00600(Sphingolipid metabolism);04071(Sphingolipid signaling pathway);04142(Lysosome)
circRNA487	3.00491	1.21088	3.80222	1.11069	3.82933	2.02045	2.67267	2.32016	up	0.204059	0.766121	no	chr15	152395889	152396274	+	1	circRNA	-	ENSSSCT00000017795	ASB1	mRNA	chr15:152388389-152395888|chr15:152396274-152397969	ankyrin repeat and SOCS box containing 1 [Source:HGNC Symbol;Acc:HGNC:16011]	GO:0005622(intracellular);GO:0035556(intracellular signal transduction);GO:0030539(male genitalia development);GO:0016567(protein ubiquitination)	NA
circRNA5313	8.60209	4.88597	10.2689	4.41697	4.80366	4.20679	7.91898	4.47581	up	0.823167	0.161389	no	chr15	152385966	152396274	+	3	circRNA	-	ENSSSCT00000017795	ASB1	mRNA	chr15:152383073-152385965|chr15:152396274-152397969	ankyrin repeat and SOCS box containing 1 [Source:HGNC Symbol;Acc:HGNC:16011]	GO:0005622(intracellular);GO:0035556(intracellular signal transduction);GO:0030539(male genitalia development);GO:0016567(protein ubiquitination)	NA
circRNA1253	13.0461	11.2288	6.0375	23.5898	15.5625	18.5594	10.1041	19.2372	down	-0.928957	0.0445892	no	chr4	16785783	16789839	+	3	circRNA	-	ENSSSCT00000006566	ATAD2	mRNA	chr4:16779552-16785782|chr4:16789839-16793505	ATPase family, AAA domain containing 2 [Source:HGNC Symbol;Acc:HGNC:30123]	GO:0070062(extracellular exosome);GO:0005654(nucleoplasm);GO:0005634(nucleus);GO:0045944(positive regulation of transcription from RNA polymerase II promoter);GO:0045893(positive regulation of transcription, DNA-templated);GO:0031936(negative regulation of chromatin silencing);GO:0006355(regulation of transcription, DNA-templated);GO:0006325(chromatin organization);GO:0042393(histone binding);GO:…	NA
circRNA3164	0	0.450482	0.0495194	1.601	0.723752	3.04448	0.166667	1.78974	down	-3.42471	0.133118	no	chr4	16798423	16799495	+	2	circRNA	-	ENSSSCT00000006566	ATAD2	mRNA	chr4:16797444-16798422|chr4:16799495-16800618	ATPase family, AAA domain containing 2 [Source:HGNC Symbol;Acc:HGNC:30123]	GO:0070062(extracellular exosome);GO:0005654(nucleoplasm);GO:0005634(nucleus);GO:0045944(positive regulation of transcription from RNA polymerase II promoter);GO:0045893(positive regulation of transcription, DNA-templated);GO:0031936(negative regulation of chromatin silencing);GO:0006355(regulation of transcription, DNA-templated);GO:0006325(chromatin organization);GO:0042393(histone binding);GO:…	NA
circRNA5918	1.19372	1.72543	2.56053	0.587119	2.89811	0	1.82656	1.16174	up	0.652836	0.545877	no	chr4	16793506	16797444	+	3	circRNA	-	ENSSSCT00000006566	ATAD2	mRNA	chr4:16789839-16793505|chr4:16797444-16798422	ATPase family, AAA domain containing 2 [Source:HGNC Symbol;Acc:HGNC:30123]	GO:0070062(extracellular exosome);GO:0005654(nucleoplasm);GO:0005634(nucleus);GO:0045944(positive regulation of transcription from RNA polymerase II promoter);GO:0045893(positive regulation of transcription, DNA-templated);GO:0031936(negative regulation of chromatin silencing);GO:0006355(regulation of transcription, DNA-templated);GO:0006325(chromatin organization);GO:0042393(histone binding);GO:…	NA
circRNA5919	0	0.716351	0.111901	1.20595	1.09033	2.83925	0.276084	1.71184	down	-2.63237	0.111983	no	chr4	16798423	16800751	+	3	circRNA	-	ENSSSCT00000006566	ATAD2	mRNA	chr4:16797444-16798422|chr4:16800751-16801582	ATPase family, AAA domain containing 2 [Source:HGNC Symbol;Acc:HGNC:30123]	GO:0070062(extracellular exosome);GO:0005654(nucleoplasm);GO:0005634(nucleus);GO:0045944(positive regulation of transcription from RNA polymerase II promoter);GO:0045893(positive regulation of transcription, DNA-templated);GO:0031936(negative regulation of chromatin silencing);GO:0006355(regulation of transcription, DNA-templated);GO:0006325(chromatin organization);GO:0042393(histone binding);GO:…	NA
circRNA604	1.12261	4.17252	1.376	0.525852	0.914134	2.23802	2.22371	1.226	up	0.859009	0.432683	no	chr4	16819910	16821577	+	2	circRNA	-	ENSSSCT00000006566	ATAD2	mRNA	chr4:16817827-16819909|chr4:16821577-16822572	ATPase family, AAA domain containing 2 [Source:HGNC Symbol;Acc:HGNC:30123]	GO:0070062(extracellular exosome);GO:0005654(nucleoplasm);GO:0005634(nucleus);GO:0045944(positive regulation of transcription from RNA polymerase II promoter);GO:0045893(positive regulation of transcription, DNA-templated);GO:0031936(negative regulation of chromatin silencing);GO:0006355(regulation of transcription, DNA-templated);GO:0006325(chromatin organization);GO:0042393(histone binding);GO:…	NA
circRNA6520	0	0	0.837703	8.35557	5.9826	1.99265	0.279234	5.44361	down	-4.28501	0.105455	no	chr4	16778493	16778684	+	1	circRNA	-	ENSSSCT00000006566	ATAD2	mRNA	chr4:16777504-16778492|chr4:16778684-16779434	ATPase family, AAA domain containing 2 [Source:HGNC Symbol;Acc:HGNC:30123]	GO:0070062(extracellular exosome);GO:0005654(nucleoplasm);GO:0005634(nucleus);GO:0045944(positive regulation of transcription from RNA polymerase II promoter);GO:0045893(positive regulation of transcription, DNA-templated);GO:0031936(negative regulation of chromatin silencing);GO:0006355(regulation of transcription, DNA-templated);GO:0006325(chromatin organization);GO:0042393(histone binding);GO:…	NA
circRNA1289	0	0	0.891349	1.43068	1.11853	2.17463	0.297116	1.57461	down	-2.40589	0.0417441	yes	chr3	33342594	33345177	-	3	circRNA	-	ENSSSCT00000032425	ATF7IP2	mRNA	chr3:33326907-33342593|chr3:33345177-33359976	activating transcription factor 7 interacting protein 2 [Source:HGNC Symbol;Acc:HGNC:20397]	NA	NA
circRNA4603	2.82127	1.73312	4.26976	0.716935	4.13203	3.8879	2.94139	2.91229	up	0.014343	0.983649	no	chr3	33342594	33371003	-	6	circRNA	-	ENSSSCT00000032425	ATF7IP2	mRNA	chr3:33326907-33342593|chr3:33371003-33376444	activating transcription factor 7 interacting protein 2 [Source:HGNC Symbol;Acc:HGNC:20397]	NA	NA
circRNA1334	5.50732	7.16223	5.16495	6.90027	4.76411	3.34289	5.94483	5.00242	up	0.249009	0.486568	no	chr2	17228897	17236390	-	5	circRNA	-	ENSSSCT00000014481	ATG13	mRNA	chr2:17224259-17228896|chr2:17236390-17265938	autophagy related 13 [Source:HGNC Symbol;Acc:HGNC:29091]	GO:1990316(ATG1/ULK1 kinase complex);GO:0005829(cytosol);GO:0005739(mitochondrion);GO:0000407(pre-autophagosomal structure);GO:1903955(positive regulation of protein targeting to mitochondrion);GO:0098779(positive regulation of macromitophagy in response to mitochondrial depolarization);GO:0006914(autophagy);GO:0000045(autophagosome assembly);GO:0019901(protein kinase binding)	04140(Regulation of autophagy)
circRNA5545	3.35338	2.87233	2.91272	4.44707	3.49252	1.19592	3.04614	3.04517	up	0.000461399	0.999291	no	chr2	17234650	17236390	-	3	circRNA	-	ENSSSCT00000014481	ATG13	mRNA	chr2:17231222-17234649|chr2:17236390-17265938	autophagy related 13 [Source:HGNC Symbol;Acc:HGNC:29091]	GO:1990316(ATG1/ULK1 kinase complex);GO:0005829(cytosol);GO:0005739(mitochondrion);GO:0000407(pre-autophagosomal structure);GO:1903955(positive regulation of protein targeting to mitochondrion);GO:0098779(positive regulation of macromitophagy in response to mitochondrial depolarization);GO:0006914(autophagy);GO:0000045(autophagosome assembly);GO:0019901(protein kinase binding)	04140(Regulation of autophagy)
circRNA2588	26.7439	25.9348	28.0495	13.3001	10.1251	6.08179	26.9094	9.83567	up	1.45202	0.00985523	yes	chr15	147691480	147701049	-	6	circRNA	-	ENSSSCT00000017750	ATG16L1	mRNA	chr15:147682059-147691479|chr15:147701049-147704189	autophagy-related protein 16-1 isoform 2 [Source:RefSeq peptide;Acc:NP_001177202]	GO:0005930(axoneme);GO:0005776(autophagosome);GO:0000421(autophagosome membrane);GO:0039689(negative stranded viral RNA replication);GO:0000045(autophagosome assembly);GO:0042802(identical protein binding)	04140(Regulation of autophagy)
circRNA5310	7.70723	5.4681	8.5587	10.6085	7.61697	3.95945	7.24468	7.39497	down	-0.0296224	0.948422	no	chr15	147691480	147697328	-	3	circRNA	-	ENSSSCT00000017750	ATG16L1	mRNA	chr15:147682059-147691479|chr15:147697328-147699283	autophagy-related protein 16-1 isoform 2 [Source:RefSeq peptide;Acc:NP_001177202]	GO:0005930(axoneme);GO:0005776(autophagosome);GO:0000421(autophagosome membrane);GO:0039689(negative stranded viral RNA replication);GO:0000045(autophagosome assembly);GO:0042802(identical protein binding)	04140(Regulation of autophagy)
circRNA4470	1.82373	0.734906	0.964149	1.58739	0	0.809786	1.17426	0.79906	up	0.555379	0.546668	no	chr6	137828146	137861689	-	9	circRNA	-	ENSSSCT00000004223	ATG4C	mRNA	chr6:137804242-137828145|chr6:137861689-137886564	autophagy related 4C cysteine peptidase [Source:HGNC Symbol;Acc:HGNC:16040]	GO:0005829(cytosol);GO:0005737(cytoplasm);GO:0005576(extracellular region);GO:0051697(protein delipidation);GO:0044804(nucleophagy);GO:0015031(protein transport);GO:0006914(autophagy);GO:0006810(transport);GO:0006612(protein targeting to membrane);GO:0006508(proteolysis);GO:0006501(C-terminal protein lipidation);GO:0000422(mitophagy);GO:0000045(autophagosome assembly);GO:0016787(hydrolase activit…	04140(Regulation of autophagy)
circRNA4471	0.0945695	0.729031	0	0	0	0	0.274533	0	up	Inf	0.353175	no	chr6	137857387	137861689	-	2	circRNA	-	ENSSSCT00000004223	ATG4C	mRNA	chr6:137849397-137857386|chr6:137861689-137886564	autophagy related 4C cysteine peptidase [Source:HGNC Symbol;Acc:HGNC:16040]	GO:0005829(cytosol);GO:0005737(cytoplasm);GO:0005576(extracellular region);GO:0051697(protein delipidation);GO:0044804(nucleophagy);GO:0015031(protein transport);GO:0006914(autophagy);GO:0006810(transport);GO:0006612(protein targeting to membrane);GO:0006508(proteolysis);GO:0006501(C-terminal protein lipidation);GO:0000422(mitophagy);GO:0000045(autophagosome assembly);GO:0016787(hydrolase activit…	04140(Regulation of autophagy)
circRNA6483	1.27657	0.787283	2.1906	0	0	1.78147	1.41815	0.593824	up	1.25591	0.324691	no	chr6	137828146	137838859	-	4	circRNA	-	ENSSSCT00000004223	ATG4C	mRNA	chr6:137804242-137828145|chr6:137838859-137844859	autophagy related 4C cysteine peptidase [Source:HGNC Symbol;Acc:HGNC:16040]	GO:0005829(cytosol);GO:0005737(cytoplasm);GO:0005576(extracellular region);GO:0051697(protein delipidation);GO:0044804(nucleophagy);GO:0015031(protein transport);GO:0006914(autophagy);GO:0006810(transport);GO:0006612(protein targeting to membrane);GO:0006508(proteolysis);GO:0006501(C-terminal protein lipidation);GO:0000422(mitophagy);GO:0000045(autophagosome assembly);GO:0016787(hydrolase activit…	04140(Regulation of autophagy)
circRNA4271	1.75012	3.71019	0	6.88626	0.554212	0	1.82011	2.48016	down	-0.446409	0.806075	no	chr15	130325057	130326093	+	2	circRNA	-	ENSSSCT00000017609	ATIC	mRNA	chr15:130321768-130325056|chr15:130326093-130326762	5-aminoimidazole-4-carboxamide ribonucleotide formyltransferase/IMP cyclohydrolase [Source:HGNC Symbol;Acc:HGNC:794]	GO:0070062(extracellular exosome);GO:0016020(membrane);GO:0005739(mitochondrion);GO:0006164(purine nucleotide biosynthetic process);GO:0045296(cadherin binding);GO:0042803(protein homodimerization activity);GO:0004643(phosphoribosylaminoimidazolecarboxamide formyltransferase activity);GO:0003937(IMP cyclohydrolase activity);GO:0003824(catalytic activity)	00230(Purine metabolism);00670(One carbon pool by folate)
circRNA836	2.26321	1.68522	0.588435	6.67883	3.12738	0	1.51229	3.26874	down	-1.112	0.461383	no	chr15	130331479	130335001	+	4	circRNA	-	ENSSSCT00000017609	ATIC	mRNA	chr15:130326919-130331478|chr15:130335001-130339051	5-aminoimidazole-4-carboxamide ribonucleotide formyltransferase/IMP cyclohydrolase [Source:HGNC Symbol;Acc:HGNC:794]	GO:0070062(extracellular exosome);GO:0016020(membrane);GO:0005739(mitochondrion);GO:0006164(purine nucleotide biosynthetic process);GO:0045296(cadherin binding);GO:0042803(protein homodimerization activity);GO:0004643(phosphoribosylaminoimidazolecarboxamide formyltransferase activity);GO:0003937(IMP cyclohydrolase activity);GO:0003824(catalytic activity)	00230(Purine metabolism);00670(One carbon pool by folate)
circRNA1532	7.07078	4.87246	5.64347	2.69589	0.312433	2.18	5.86224	1.72944	up	1.76115	0.0133805	yes	chr8	39388465	39390036	+	3	circRNA	-	ENSSSCT00000009642	ATP10D	mRNA	chr8:39388176-39388464|chr8:39390036-39393054	ATPase phospholipid transporting 10D (putative) [Source:HGNC Symbol;Acc:HGNC:13549]	GO:0016021(integral component of membrane);GO:0016020(membrane);GO:0005886(plasma membrane);GO:0005783(endoplasmic reticulum);GO:0005654(nucleoplasm);GO:0045332(phospholipid translocation);GO:0015914(phospholipid transport);GO:0046872(metal ion binding);GO:0016787(hydrolase activity);GO:0005524(ATP binding);GO:0004012(phospholipid-translocating ATPase activity);GO:0000287(magnesium ion binding);G…	NA
circRNA4054	6.12843	13.0268	13.2314	0	2.7398	2.0123	10.7955	1.58403	up	2.76876	0.0461678	yes	chr8	39412477	39415359	+	2	circRNA	-	ENSSSCT00000009642	ATP10D	mRNA	chr8:39411143-39412476|chr8:39415359-39467604	ATPase phospholipid transporting 10D (putative) [Source:HGNC Symbol;Acc:HGNC:13549]	GO:0016021(integral component of membrane);GO:0016020(membrane);GO:0005886(plasma membrane);GO:0005783(endoplasmic reticulum);GO:0005654(nucleoplasm);GO:0045332(phospholipid translocation);GO:0015914(phospholipid transport);GO:0046872(metal ion binding);GO:0016787(hydrolase activity);GO:0005524(ATP binding);GO:0004012(phospholipid-translocating ATPase activity);GO:0000287(magnesium ion binding);G…	NA
circRNA3682	3.7611	0.129438	0.512226	0	2.46713	1.96824	1.46759	1.47846	down	-0.0106463	0.994134	no	chrX	130722670	130723305	-	2	circRNA	-	ENSSSCT00000013899	ATP11C	mRNA	chrX:130721291-130722669|chrX:130723305-130729173	ATPase phospholipid transporting 11C [Source:HGNC Symbol;Acc:HGNC:13554]	GO:0016021(integral component of membrane);GO:0016020(membrane);GO:0045332(phospholipid translocation);GO:0015914(phospholipid transport);GO:0005524(ATP binding);GO:0004012(phospholipid-translocating ATPase activity);GO:0000287(magnesium ion binding);GO:0055037(recycling endosome);GO:0005886(plasma membrane);GO:0005783(endoplasmic reticulum);GO:0005765(lysosomal membrane);GO:0045579(positive regu…	NA
circRNA868	1.69135	2.85217	0.906987	6.3777	1.6068	0.442555	1.81684	2.80902	down	-0.628638	0.646337	no	chrX	130750807	130763718	-	4	circRNA	-	ENSSSCT00000013899	ATP11C	mRNA	chrX:130737665-130750806|chrX:130763718-130769590	ATPase phospholipid transporting 11C [Source:HGNC Symbol;Acc:HGNC:13554]	GO:0016021(integral component of membrane);GO:0016020(membrane);GO:0045332(phospholipid translocation);GO:0015914(phospholipid transport);GO:0005524(ATP binding);GO:0004012(phospholipid-translocating ATPase activity);GO:0000287(magnesium ion binding);GO:0055037(recycling endosome);GO:0005886(plasma membrane);GO:0005783(endoplasmic reticulum);GO:0005765(lysosomal membrane);GO:0045579(positive regu…	NA
circRNA2391	0.788374	3.98838	1.31527	0	0.811377	0	2.03067	0.270459	up	2.90848	0.212228	no	chr13	140998202	140999525	-	3	circRNA	-	ENSSSCT00000012937	ATP13A3	mRNA	chr13:140996154-140998201|chr13:140999525-141000218	ATPase 13A3 [Source:HGNC Symbol;Acc:HGNC:24113]	GO:0043231(intracellular membrane-bounded organelle);GO:0016021(integral component of membrane);GO:0016020(membrane);GO:0005887(integral component of plasma membrane);GO:0099132(ATP hydrolysis coupled cation transmembrane transport);GO:0070588(calcium ion transmembrane transport);GO:0006874(cellular calcium ion homeostasis);GO:0006812(cation transport);GO:0046872(metal ion binding);GO:0016887(ATP…	NA
circRNA5078	3.64265	2.72496	3.28989	4.30613	1.97312	1.63871	3.21916	2.63932	up	0.28652	0.567753	no	chr13	140915527	140921126	-	8	circRNA	-	ENSSSCT00000012937	ATP13A3	mRNA	chr13:140914588-140915526|chr13:140921126-140973311	ATPase 13A3 [Source:HGNC Symbol;Acc:HGNC:24113]	GO:0043231(intracellular membrane-bounded organelle);GO:0016021(integral component of membrane);GO:0016020(membrane);GO:0005887(integral component of plasma membrane);GO:0099132(ATP hydrolysis coupled cation transmembrane transport);GO:0070588(calcium ion transmembrane transport);GO:0006874(cellular calcium ion homeostasis);GO:0006812(cation transport);GO:0046872(metal ion binding);GO:0016887(ATP…	NA
circRNA3820	44.0088	52.9926	33.7655	23.9195	29.8793	20.144	43.5889	24.6476	up	0.822513	0.0565767	no	chr4	114436524	114438133	-	4	circRNA	-	ENSSSCT00000007385	ATP1A1	mRNA	chr4:114435581-114436523|chr4:114438133-114438921	sodium/potassium-transporting ATPase subunit alpha-1 precursor [Source:RefSeq peptide;Acc:NP_999414]	GO:0016021(integral component of membrane);GO:0016020(membrane);GO:0090662(ATP hydrolysis coupled transmembrane transport);GO:0016311(dephosphorylation);GO:0010248(establishment or maintenance of transmembrane electrochemical gradient);GO:0006814(sodium ion transport);GO:0006813(potassium ion transport);GO:0006811(ion transport);GO:0006810(transport);GO:0046872(metal ion binding);GO:0016787(hydro…	04024(cAMP signaling pathway);04022(cGMP - PKG signaling pathway);04911(Insulin secretion);04918(Thyroid hormone synthesis);04919(Thyroid hormone signaling pathway);04260(Cardiac muscle contraction);04261(Adrenergic signaling in cardiomyocytes);04970(Salivary secretion);04971(Gastric acid secretion);04972(Pancreatic secretion);04976(Bile secretion);04973(Carbohydrate digestion and absorption);049…
circRNA4583	64.3159	68.3412	46.2519	29.6794	29.7094	25.6305	59.6363	28.3398	up	1.07336	0.0395192	yes	chr4	114445064	114447905	-	6	circRNA	-	ENSSSCT00000007385	ATP1A1	mRNA	chr4:114442327-114445063|chr4:114447905-114448758	sodium/potassium-transporting ATPase subunit alpha-1 precursor [Source:RefSeq peptide;Acc:NP_999414]	GO:0016021(integral component of membrane);GO:0016020(membrane);GO:0090662(ATP hydrolysis coupled transmembrane transport);GO:0016311(dephosphorylation);GO:0010248(establishment or maintenance of transmembrane electrochemical gradient);GO:0006814(sodium ion transport);GO:0006813(potassium ion transport);GO:0006811(ion transport);GO:0006810(transport);GO:0046872(metal ion binding);GO:0016787(hydro…	04024(cAMP signaling pathway);04022(cGMP - PKG signaling pathway);04911(Insulin secretion);04918(Thyroid hormone synthesis);04919(Thyroid hormone signaling pathway);04260(Cardiac muscle contraction);04261(Adrenergic signaling in cardiomyocytes);04970(Salivary secretion);04971(Gastric acid secretion);04972(Pancreatic secretion);04976(Bile secretion);04973(Carbohydrate digestion and absorption);049…
circRNA4756	17.9472	10.6585	10.0114	7.93103	4.11599	8.9491	12.8724	6.99871	up	0.879118	0.1337	no	chr1	105950020	105950799	+	3	circRNA	-	ENSSSCT00000004971	ATP5A1	mRNA	chr1:105947272-105950019|chr1:105950799-105951341	ATP synthase, H+ transporting, mitochondrial F1 complex, alpha subunit 1, cardiac muscle [Source:HGNC Symbol;Acc:HGNC:823]	GO:0070062(extracellular exosome);GO:0045261(proton-transporting ATP synthase complex, catalytic core F(1));GO:0043209(myelin sheath);GO:0031012(extracellular matrix);GO:0016020(membrane);GO:0008180(COP9 signalosome);GO:0005886(plasma membrane);GO:0005753(mitochondrial proton-transporting ATP synthase complex);GO:0005743(mitochondrial inner membrane);GO:0005739(mitochondrion);GO:0099132(ATP hydro…	00190(Oxidative phosphorylation);05010(Alzheimer's disease);05012(Parkinson's disease);05016(Huntington's disease)
circRNA6643	8.12048	4.67166	12.3633	14.5452	5.14302	4.31301	8.38516	8.00043	up	0.0677618	0.927955	no	chr1	105950020	105950193	+	1	circRNA	-	ENSSSCT00000004971	ATP5A1	mRNA	chr1:105947272-105950019|chr1:105950193-105950281	ATP synthase, H+ transporting, mitochondrial F1 complex, alpha subunit 1, cardiac muscle [Source:HGNC Symbol;Acc:HGNC:823]	GO:0070062(extracellular exosome);GO:0045261(proton-transporting ATP synthase complex, catalytic core F(1));GO:0043209(myelin sheath);GO:0031012(extracellular matrix);GO:0016020(membrane);GO:0008180(COP9 signalosome);GO:0005886(plasma membrane);GO:0005753(mitochondrial proton-transporting ATP synthase complex);GO:0005743(mitochondrial inner membrane);GO:0005739(mitochondrion);GO:0099132(ATP hydro…	00190(Oxidative phosphorylation);05010(Alzheimer's disease);05012(Parkinson's disease);05016(Huntington's disease)
circRNA977	16.5579	13.2064	15.092	0.953787	9.91995	8.54795	14.9521	6.4739	up	1.20764	0.0802551	no	chr1	105951342	105951833	+	2	circRNA	-	ENSSSCT00000004971	ATP5A1	mRNA	chr1:105950799-105951341|chr1:105951833-105954319	ATP synthase, H+ transporting, mitochondrial F1 complex, alpha subunit 1, cardiac muscle [Source:HGNC Symbol;Acc:HGNC:823]	GO:0070062(extracellular exosome);GO:0045261(proton-transporting ATP synthase complex, catalytic core F(1));GO:0043209(myelin sheath);GO:0031012(extracellular matrix);GO:0016020(membrane);GO:0008180(COP9 signalosome);GO:0005886(plasma membrane);GO:0005753(mitochondrial proton-transporting ATP synthase complex);GO:0005743(mitochondrial inner membrane);GO:0005739(mitochondrion);GO:0099132(ATP hydro…	00190(Oxidative phosphorylation);05010(Alzheimer's disease);05012(Parkinson's disease);05016(Huntington's disease)
ciRNA190	0	3.67814	3.82084	0	0	0	2.49966	0	up	Inf	0.183651	no	chr5	23664661	23664881	-	1	ciRNA	-	ENSSSCT00000033906	ATP5B	mRNA	chr5:23664610-23664881	ATP synthase, H+ transporting, mitochondrial F1 complex, beta polypeptide [Source:HGNC Symbol;Acc:HGNC:830]	GO:0045261(proton-transporting ATP synthase complex, catalytic core F(1));GO:0099132(ATP hydrolysis coupled cation transmembrane transport);GO:0046034(ATP metabolic process);GO:0015992(proton transport);GO:0015986(ATP synthesis coupled proton transport);GO:0006754(ATP biosynthetic process);GO:0046933(proton-transporting ATP synthase activity, rotational mechanism);GO:0005524(ATP binding);GO:00001…	00190(Oxidative phosphorylation);05010(Alzheimer's disease);05012(Parkinson's disease);05016(Huntington's disease)
circRNA72	16.9728	25.0716	18.0217	23.7941	29.0303	11.9138	20.0221	21.5794	down	-0.108064	0.801568	no	chr5	23660897	23661707	-	2	circRNA	-	ENSSSCT00000033906	ATP5B	mRNA	chr5:23659341-23660896|chr5:23661707-23663519	ATP synthase, H+ transporting, mitochondrial F1 complex, beta polypeptide [Source:HGNC Symbol;Acc:HGNC:830]	GO:0045261(proton-transporting ATP synthase complex, catalytic core F(1));GO:0099132(ATP hydrolysis coupled cation transmembrane transport);GO:0046034(ATP metabolic process);GO:0015992(proton transport);GO:0015986(ATP synthesis coupled proton transport);GO:0006754(ATP biosynthetic process);GO:0046933(proton-transporting ATP synthase activity, rotational mechanism);GO:0005524(ATP binding);GO:00001…	00190(Oxidative phosphorylation);05010(Alzheimer's disease);05012(Parkinson's disease);05016(Huntington's disease)
circRNA1833	8.52895	8.77065	8.00959	2.50441	3.38616	1.86528	8.4364	2.58528	up	1.70631	0.00135894	yes	chrX	40375709	40383814	+	4	circRNA	-	ENSSSCT00000033880	ATP6AP2	mRNA	chrX:40369525-40375708|chrX:40383814-40384960	NA	GO:0016021(integral component of membrane);GO:0016020(membrane);GO:0004872(receptor activity)	NA
circRNA3671	7.99928	7.98486	7.37057	4.66853	3.0543	1.68247	7.7849	3.1351	up	1.31217	0.0272855	yes	chrX	40375709	40385014	+	5	circRNA	-	ENSSSCT00000033880	ATP6AP2	mRNA	chrX:40369525-40375708|chrX:40385014-40393399	NA	GO:0016021(integral component of membrane);GO:0016020(membrane);GO:0004872(receptor activity)	NA
circRNA2213	1.44817	0	0	0	0	0	0.482724	0	up	Inf	0.42265	no	chr18	11374388	11375497	+	3	circRNA	-	ENSSSCT00000017984	ATP6V0A4	mRNA	chr18:11367348-11374387|chr18:11375497-11377440	ATPase H+ transporting V0 subunit a4 [Source:HGNC Symbol;Acc:HGNC:866]	GO:0070062(extracellular exosome);GO:0045177(apical part of cell);GO:0033179(proton-transporting V-type ATPase, V0 domain);GO:0031526(brush border membrane);GO:0016471(vacuolar proton-transporting V-type ATPase complex);GO:0016324(apical plasma membrane);GO:0016021(integral component of membrane);GO:0016020(membrane);GO:0005903(brush border);GO:0005886(plasma membrane);GO:0005768(endosome);GO:000…	00190(Oxidative phosphorylation);04145(Phagosome);04142(Lysosome);04966(Collecting duct acid secretion);04721(Synaptic vesicle cycle);05323(Rheumatoid arthritis);05152(Tuberculosis)
circRNA3986	0.937289	1.01609	0.335081	0	0	0	0.762819	0	up	Inf	0.0711185	no	chr18	11374388	11377567	+	4	circRNA	-	ENSSSCT00000017984	ATP6V0A4	mRNA	chr18:11367348-11374387|chr18:11377567-11382152	ATPase H+ transporting V0 subunit a4 [Source:HGNC Symbol;Acc:HGNC:866]	GO:0070062(extracellular exosome);GO:0045177(apical part of cell);GO:0033179(proton-transporting V-type ATPase, V0 domain);GO:0031526(brush border membrane);GO:0016471(vacuolar proton-transporting V-type ATPase complex);GO:0016324(apical plasma membrane);GO:0016021(integral component of membrane);GO:0016020(membrane);GO:0005903(brush border);GO:0005886(plasma membrane);GO:0005768(endosome);GO:000…	00190(Oxidative phosphorylation);04145(Phagosome);04142(Lysosome);04966(Collecting duct acid secretion);04721(Synaptic vesicle cycle);05323(Rheumatoid arthritis);05152(Tuberculosis)
circRNA6521	1.17738	5.00535	4.06059	5.81356	1.20625	4.4459	3.41444	3.8219	down	-0.162641	0.83108	no	chr4	36903256	36917862	-	6	circRNA	-	ENSSSCT00000006643	ATP6V1C1	mRNA	chr4:36900231-36903255|None	ATPase, H+ transporting, lysosomal 42kDa, V1 subunit C1 [Source:RefSeq peptide;Acc:NP_001177134]	GO:0070062(extracellular exosome);GO:0033180(proton-transporting V-type ATPase, V1 domain);GO:0005886(plasma membrane);GO:0005765(lysosomal membrane);GO:0000221(vacuolar proton-transporting V-type ATPase, V1 domain);GO:0015991(ATP hydrolysis coupled proton transport);GO:0046961(proton-transporting ATPase activity, rotational mechanism);GO:0015078(hydrogen ion transmembrane transporter activity);G…	00190(Oxidative phosphorylation);04145(Phagosome);04966(Collecting duct acid secretion);04721(Synaptic vesicle cycle);05323(Rheumatoid arthritis)
circRNA6522	0	1.02895	2.12077	0.233416	0.281783	2.73189	1.04991	1.08236	down	-0.0439263	0.976428	no	chr4	36916142	36917862	-	2	circRNA	-	ENSSSCT00000006643	ATP6V1C1	mRNA	chr4:36908903-36916141|None	ATPase, H+ transporting, lysosomal 42kDa, V1 subunit C1 [Source:RefSeq peptide;Acc:NP_001177134]	GO:0070062(extracellular exosome);GO:0033180(proton-transporting V-type ATPase, V1 domain);GO:0005886(plasma membrane);GO:0005765(lysosomal membrane);GO:0000221(vacuolar proton-transporting V-type ATPase, V1 domain);GO:0015991(ATP hydrolysis coupled proton transport);GO:0046961(proton-transporting ATPase activity, rotational mechanism);GO:0015078(hydrogen ion transmembrane transporter activity);G…	00190(Oxidative phosphorylation);04145(Phagosome);04966(Collecting duct acid secretion);04721(Synaptic vesicle cycle);05323(Rheumatoid arthritis)
circRNA1087	3.04377	5.97082	10.2597	9.33875	13.2877	13.5772	6.42477	12.0679	down	-0.909456	0.0979706	no	chr17	59385749	59391561	-	4	circRNA	-	ENSSSCT00000008185	ATP9A	mRNA	chr17:59384036-59385748|chr17:59391561-59394464	ATPase phospholipid transporting 9A (putative) [Source:HGNC Symbol;Acc:HGNC:13540]	GO:0016021(integral component of membrane);GO:0016020(membrane);GO:0005802(trans-Golgi network);GO:0005768(endosome);GO:0045332(phospholipid translocation);GO:0015914(phospholipid transport);GO:0046872(metal ion binding);GO:0016787(hydrolase activity);GO:0005524(ATP binding);GO:0004012(phospholipid-translocating ATPase activity);GO:0000287(magnesium ion binding);GO:0000166(nucleotide binding);GO:…	NA
circRNA1723	8.02299	8.39376	5.24475	27.5846	25.2612	13.0355	7.2205	21.9605	down	-1.60474	0.0760408	no	chr17	59478778	59484993	-	3	circRNA	-	ENSSSCT00000008185	ATP9A	mRNA	chr17:59464069-59478777|chr17:59484993-59513861	ATPase phospholipid transporting 9A (putative) [Source:HGNC Symbol;Acc:HGNC:13540]	GO:0016021(integral component of membrane);GO:0016020(membrane);GO:0005802(trans-Golgi network);GO:0005768(endosome);GO:0045332(phospholipid translocation);GO:0015914(phospholipid transport);GO:0046872(metal ion binding);GO:0016787(hydrolase activity);GO:0005524(ATP binding);GO:0004012(phospholipid-translocating ATPase activity);GO:0000287(magnesium ion binding);GO:0000166(nucleotide binding);GO:…	NA
circRNA446	5.96064	3.68351	4.57069	10.3459	4.14442	4.20428	4.73828	6.23152	down	-0.395221	0.55019	no	chr17	59438248	59456350	-	6	circRNA	-	ENSSSCT00000008185	ATP9A	mRNA	chr17:59429369-59438247|chr17:59456350-59459863	ATPase phospholipid transporting 9A (putative) [Source:HGNC Symbol;Acc:HGNC:13540]	GO:0016021(integral component of membrane);GO:0016020(membrane);GO:0005802(trans-Golgi network);GO:0005768(endosome);GO:0045332(phospholipid translocation);GO:0015914(phospholipid transport);GO:0046872(metal ion binding);GO:0016787(hydrolase activity);GO:0005524(ATP binding);GO:0004012(phospholipid-translocating ATPase activity);GO:0000287(magnesium ion binding);GO:0000166(nucleotide binding);GO:…	NA
circRNA5223	0.531656	3.92773	1.85843	17.8394	4.37734	3.33869	2.10594	8.51848	down	-2.01613	0.301949	no	chr17	59442209	59445461	-	2	circRNA	-	ENSSSCT00000008185	ATP9A	mRNA	chr17:59439777-59442208|chr17:59445461-59454682	ATPase phospholipid transporting 9A (putative) [Source:HGNC Symbol;Acc:HGNC:13540]	GO:0016021(integral component of membrane);GO:0016020(membrane);GO:0005802(trans-Golgi network);GO:0005768(endosome);GO:0045332(phospholipid translocation);GO:0015914(phospholipid transport);GO:0046872(metal ion binding);GO:0016787(hydrolase activity);GO:0005524(ATP binding);GO:0004012(phospholipid-translocating ATPase activity);GO:0000287(magnesium ion binding);GO:0000166(nucleotide binding);GO:…	NA
circRNA1605	2.50925	2.85265	0.349416	0	1.69635	1.04264	1.90377	0.912995	up	1.06018	0.355243	no	chr13	91070338	91074476	-	4	circRNA	-	ENSSSCT00000012786	ATR	mRNA	chr13:91069866-91070337|chr13:91074476-91075361	ATR serine/threonine kinase [Source:HGNC Symbol;Acc:HGNC:882]	GO:0016605(PML body);GO:0005794(Golgi apparatus);GO:0005654(nucleoplasm);GO:1904884(positive regulation of telomerase catalytic core complex assembly);GO:0097694(establishment of RNA localization to telomere);GO:0090399(replicative senescence);GO:0071480(cellular response to gamma radiation);GO:0070198(protein localization to chromosome, telomeric region);GO:0046777(protein autophosphorylation);G…	03460(Fanconi anemia pathway);04110(Cell cycle);04115(p53 signaling pathway);05166(HTLV-I infection)
circRNA3468	1.50636	3.08455	3.76966	0	0	0	2.78686	0	up	Inf	0.0532411	no	chr13	91057347	91060327	-	2	circRNA	-	ENSSSCT00000012786	ATR	mRNA	chr13:91055350-91057346|chr13:91060327-91062080	ATR serine/threonine kinase [Source:HGNC Symbol;Acc:HGNC:882]	GO:0016605(PML body);GO:0005794(Golgi apparatus);GO:0005654(nucleoplasm);GO:1904884(positive regulation of telomerase catalytic core complex assembly);GO:0097694(establishment of RNA localization to telomere);GO:0090399(replicative senescence);GO:0071480(cellular response to gamma radiation);GO:0070198(protein localization to chromosome, telomeric region);GO:0046777(protein autophosphorylation);G…	03460(Fanconi anemia pathway);04110(Cell cycle);04115(p53 signaling pathway);05166(HTLV-I infection)
circRNA5051	0.174289	2.68717	0	7.88648	2.53884	0	0.95382	3.47511	down	-1.86527	0.396157	no	chr13	91083231	91085164	-	2	circRNA	-	ENSSSCT00000012786	ATR	mRNA	chr13:91080957-91083230|chr13:91085164-91093890	ATR serine/threonine kinase [Source:HGNC Symbol;Acc:HGNC:882]	GO:0016605(PML body);GO:0005794(Golgi apparatus);GO:0005654(nucleoplasm);GO:1904884(positive regulation of telomerase catalytic core complex assembly);GO:0097694(establishment of RNA localization to telomere);GO:0090399(replicative senescence);GO:0071480(cellular response to gamma radiation);GO:0070198(protein localization to chromosome, telomeric region);GO:0046777(protein autophosphorylation);G…	03460(Fanconi anemia pathway);04110(Cell cycle);04115(p53 signaling pathway);05166(HTLV-I infection)
circRNA5671	1.02306	2.82309	3.45795	1.64678	0.70685	0.713846	2.4347	1.02249	up	1.25165	0.182829	no	chr13	91026859	91041638	-	6	circRNA	-	ENSSSCT00000012786	ATR	mRNA	chr13:91023547-91026858|chr13:91041638-91050769	ATR serine/threonine kinase [Source:HGNC Symbol;Acc:HGNC:882]	GO:0016605(PML body);GO:0005794(Golgi apparatus);GO:0005654(nucleoplasm);GO:1904884(positive regulation of telomerase catalytic core complex assembly);GO:0097694(establishment of RNA localization to telomere);GO:0090399(replicative senescence);GO:0071480(cellular response to gamma radiation);GO:0070198(protein localization to chromosome, telomeric region);GO:0046777(protein autophosphorylation);G…	03460(Fanconi anemia pathway);04110(Cell cycle);04115(p53 signaling pathway);05166(HTLV-I infection)
circRNA6783	3.34257	2.03429	1.50944	0	0.222841	0.552387	2.29543	0.258409	up	3.15104	0.0549034	no	chr13	90984047	90993396	-	6	circRNA	-	ENSSSCT00000012786	ATR	mRNA	chr13:90980743-90984046|chr13:90993396-90995315	ATR serine/threonine kinase [Source:HGNC Symbol;Acc:HGNC:882]	GO:0016605(PML body);GO:0005794(Golgi apparatus);GO:0005654(nucleoplasm);GO:1904884(positive regulation of telomerase catalytic core complex assembly);GO:0097694(establishment of RNA localization to telomere);GO:0090399(replicative senescence);GO:0071480(cellular response to gamma radiation);GO:0070198(protein localization to chromosome, telomeric region);GO:0046777(protein autophosphorylation);G…	03460(Fanconi anemia pathway);04110(Cell cycle);04115(p53 signaling pathway);05166(HTLV-I infection)
circRNA6784	0.817199	1.80355	0.22618	0	2.18713	0.974867	0.948978	1.054	down	-0.151427	0.900264	no	chr13	91072247	91076217	-	4	circRNA	-	ENSSSCT00000012786	ATR	mRNA	chr13:91070716-91072246|chr13:91076217-91078464	ATR serine/threonine kinase [Source:HGNC Symbol;Acc:HGNC:882]	GO:0016605(PML body);GO:0005794(Golgi apparatus);GO:0005654(nucleoplasm);GO:1904884(positive regulation of telomerase catalytic core complex assembly);GO:0097694(establishment of RNA localization to telomere);GO:0090399(replicative senescence);GO:0071480(cellular response to gamma radiation);GO:0070198(protein localization to chromosome, telomeric region);GO:0046777(protein autophosphorylation);G…	03460(Fanconi anemia pathway);04110(Cell cycle);04115(p53 signaling pathway);05166(HTLV-I infection)
circRNA1716	10.8342	27.1329	20.3442	0	2.23832	3.03193	19.4371	1.75675	up	3.46783	0.0598922	no	chr17	36391525	36419177	-	4	circRNA	-	ENSSSCT00000007826	ATRN	mRNA	chr17:36386062-36391524|chr17:36419177-36439070	attractin [Source:HGNC Symbol;Acc:HGNC:885]	GO:0016021(integral component of membrane);GO:0016020(membrane);GO:0070062(extracellular exosome);GO:0005615(extracellular space);GO:0043473(pigmentation);GO:0042552(myelination);GO:0040014(regulation of multicellular organism growth);GO:0021549(cerebellum development);GO:0004872(receptor activity)	NA
circRNA2519	5.09423	4.16991	7.64159	2.47861	1.45707	3.47808	5.63524	2.47125	up	1.18923	0.0727044	no	chr17	36439071	36449044	-	4	circRNA	-	ENSSSCT00000007826	ATRN	mRNA	chr17:36419177-36439070|chr17:36449044-36451567	attractin [Source:HGNC Symbol;Acc:HGNC:885]	GO:0016021(integral component of membrane);GO:0016020(membrane);GO:0070062(extracellular exosome);GO:0005615(extracellular space);GO:0043473(pigmentation);GO:0042552(myelination);GO:0040014(regulation of multicellular organism growth);GO:0021549(cerebellum development);GO:0004872(receptor activity)	NA
circRNA3562	9.16913	11.513	6.3043	0.619521	0.727364	1.31834	8.99547	0.888407	up	3.3399	0.030643	yes	chr17	36480170	36487214	-	5	circRNA	-	ENSSSCT00000007826	ATRN	mRNA	chr17:36473817-36480169|chr17:36487214-36500875	attractin [Source:HGNC Symbol;Acc:HGNC:885]	GO:0016021(integral component of membrane);GO:0016020(membrane);GO:0070062(extracellular exosome);GO:0005615(extracellular space);GO:0043473(pigmentation);GO:0042552(myelination);GO:0040014(regulation of multicellular organism growth);GO:0021549(cerebellum development);GO:0004872(receptor activity)	NA
circRNA4209	6.77362	10.2282	5.39237	0	2.34402	1.51048	7.46472	1.28483	up	2.53851	0.032941	yes	chr17	36391525	36402917	-	3	circRNA	-	ENSSSCT00000007826	ATRN	mRNA	chr17:36386062-36391524|chr17:36402917-36419115	attractin [Source:HGNC Symbol;Acc:HGNC:885]	GO:0016021(integral component of membrane);GO:0016020(membrane);GO:0070062(extracellular exosome);GO:0005615(extracellular space);GO:0043473(pigmentation);GO:0042552(myelination);GO:0040014(regulation of multicellular organism growth);GO:0021549(cerebellum development);GO:0004872(receptor activity)	NA
circRNA4210	2.40254	3.85856	5.96643	4.02643	1.01442	4.03575	4.07584	3.02553	up	0.429909	0.506964	no	chr17	36439071	36441260	-	2	circRNA	-	ENSSSCT00000007826	ATRN	mRNA	chr17:36419177-36439070|chr17:36441260-36444677	attractin [Source:HGNC Symbol;Acc:HGNC:885]	GO:0016021(integral component of membrane);GO:0016020(membrane);GO:0070062(extracellular exosome);GO:0005615(extracellular space);GO:0043473(pigmentation);GO:0042552(myelination);GO:0040014(regulation of multicellular organism growth);GO:0021549(cerebellum development);GO:0004872(receptor activity)	NA
circRNA441	5.43901	7.02113	10.2726	1.41328	2.14484	1.43211	7.57757	1.66341	up	2.18759	0.0497299	yes	chr17	36464871	36467765	-	2	circRNA	-	ENSSSCT00000007826	ATRN	mRNA	chr17:36463134-36464870|chr17:36467765-36470198	attractin [Source:HGNC Symbol;Acc:HGNC:885]	GO:0016021(integral component of membrane);GO:0016020(membrane);GO:0070062(extracellular exosome);GO:0005615(extracellular space);GO:0043473(pigmentation);GO:0042552(myelination);GO:0040014(regulation of multicellular organism growth);GO:0021549(cerebellum development);GO:0004872(receptor activity)	NA
circRNA442	6.33872	7.26603	6.01428	2.38379	1.43332	1.44634	6.53968	1.75448	up	1.89817	0.000710094	yes	chr17	36500876	36516369	-	5	circRNA	-	ENSSSCT00000007826	ATRN	mRNA	chr17:36487214-36500875|chr17:36516369-36618543	attractin [Source:HGNC Symbol;Acc:HGNC:885]	GO:0016021(integral component of membrane);GO:0016020(membrane);GO:0070062(extracellular exosome);GO:0005615(extracellular space);GO:0043473(pigmentation);GO:0042552(myelination);GO:0040014(regulation of multicellular organism growth);GO:0021549(cerebellum development);GO:0004872(receptor activity)	NA
circRNA5205	6.85904	7.59599	4.22918	2.7078	1.62814	1.64293	6.22807	1.99296	up	1.64388	0.0415009	yes	chr17	36500876	36512513	-	4	circRNA	-	ENSSSCT00000007826	ATRN	mRNA	chr17:36487214-36500875|chr17:36512513-36516285	attractin [Source:HGNC Symbol;Acc:HGNC:885]	GO:0016021(integral component of membrane);GO:0016020(membrane);GO:0070062(extracellular exosome);GO:0005615(extracellular space);GO:0043473(pigmentation);GO:0042552(myelination);GO:0040014(regulation of multicellular organism growth);GO:0021549(cerebellum development);GO:0004872(receptor activity)	NA
circRNA1819	0.0874337	0.0168505	0.35842	0	0	0	0.154235	0	up	Inf	0.276654	no	chr14	136748505	136775595	+	4	circRNA	-	ENSSSCT00000032203	ATRNL1	mRNA	chr14:136739114-136748504|chr14:136775595-136809481	attractin like 1 [Source:HGNC Symbol;Acc:HGNC:29063]	GO:0016021(integral component of membrane);GO:0016020(membrane);GO:0007186(G-protein coupled receptor signaling pathway)	NA
circRNA2644	0.120165	0.0231587	0.183292	0	0	0	0.108872	0	up	Inf	0.144374	no	chr14	136748505	136760286	+	3	circRNA	-	ENSSSCT00000032203	ATRNL1	mRNA	chr14:136739114-136748504|chr14:136760286-136775376	attractin like 1 [Source:HGNC Symbol;Acc:HGNC:29063]	GO:0016021(integral component of membrane);GO:0016020(membrane);GO:0007186(G-protein coupled receptor signaling pathway)	NA
circRNA3661	0.708213	0.227482	0	0	0	0	0.311898	0	up	Inf	0.273747	no	chr14	136612215	136622206	+	4	circRNA	-	ENSSSCT00000032203	ATRNL1	mRNA	chr14:136580507-136612214|chr14:136622206-136640071	attractin like 1 [Source:HGNC Symbol;Acc:HGNC:29063]	GO:0016021(integral component of membrane);GO:0016020(membrane);GO:0007186(G-protein coupled receptor signaling pathway)	NA
circRNA4323	0.50487	0.552468	2.378	0	0	0	1.14511	0	up	Inf	0.204412	no	chr14	136706141	136809619	+	10	circRNA	-	ENSSSCT00000032203	ATRNL1	mRNA	chr14:136683701-136706140|chr14:136809619-136831007	attractin like 1 [Source:HGNC Symbol;Acc:HGNC:29063]	GO:0016021(integral component of membrane);GO:0016020(membrane);GO:0007186(G-protein coupled receptor signaling pathway)	NA
circRNA5384	1.83383	0	0	0	0	0	0.611275	0	up	Inf	0.42265	no	chr14	136683518	136683701	+	1	circRNA	-	ENSSSCT00000032203	ATRNL1	mRNA	chr14:136651646-136683517|chr14:136683701-136706140	attractin like 1 [Source:HGNC Symbol;Acc:HGNC:29063]	GO:0016021(integral component of membrane);GO:0016020(membrane);GO:0007186(G-protein coupled receptor signaling pathway)	NA
circRNA1127	0.732257	0.940821	0.372313	0	1.2058	0	0.681797	0.401932	up	0.76239	0.570948	no	chrX	70495253	70498760	-	3	circRNA	-	ENSSSCT00000013595	ATRX	mRNA	chrX:70475483-70495252|chrX:70498760-70506112	ATRX, chromatin remodeler [Source:HGNC Symbol;Acc:HGNC:886]	GO:1990707(nuclear subtelomeric heterochromatin);GO:0070603(SWI/SNF superfamily-type complex);GO:0031933(telomeric heterochromatin);GO:0031618(nuclear pericentric heterochromatin);GO:0016605(PML body);GO:0016604(nuclear body);GO:0005721(pericentric heterochromatin);GO:0005654(nucleoplasm);GO:0005634(nucleus);GO:0000792(heterochromatin);GO:0000784(nuclear chromosome, telomeric region);GO:0000780(c…	NA
circRNA2671	2.93829	2.57034	4.41036	0	0.514727	0.029081	3.30633	0.181269	up	4.18902	0.0233555	yes	chrX	70495253	70509324	-	7	circRNA	-	ENSSSCT00000013595	ATRX	mRNA	chrX:70475483-70495252|chrX:70509324-70638359	ATRX, chromatin remodeler [Source:HGNC Symbol;Acc:HGNC:886]	GO:1990707(nuclear subtelomeric heterochromatin);GO:0070603(SWI/SNF superfamily-type complex);GO:0031933(telomeric heterochromatin);GO:0031618(nuclear pericentric heterochromatin);GO:0016605(PML body);GO:0016604(nuclear body);GO:0005721(pericentric heterochromatin);GO:0005654(nucleoplasm);GO:0005634(nucleus);GO:0000792(heterochromatin);GO:0000784(nuclear chromosome, telomeric region);GO:0000780(c…	NA
circRNA6972	6.14086	1.55722	2.00278	8.90201	0	4.62309	3.23362	4.50837	down	-0.479454	0.693947	no	chrX	70452530	70457620	-	2	circRNA	-	ENSSSCT00000013595	ATRX	mRNA	chrX:70438451-70452529|chrX:70457620-70474454	ATRX, chromatin remodeler [Source:HGNC Symbol;Acc:HGNC:886]	GO:1990707(nuclear subtelomeric heterochromatin);GO:0070603(SWI/SNF superfamily-type complex);GO:0031933(telomeric heterochromatin);GO:0031618(nuclear pericentric heterochromatin);GO:0016605(PML body);GO:0016604(nuclear body);GO:0005721(pericentric heterochromatin);GO:0005654(nucleoplasm);GO:0005634(nucleus);GO:0000792(heterochromatin);GO:0000784(nuclear chromosome, telomeric region);GO:0000780(c…	NA
circRNA2609	1.61337	3.55353	0.659176	3.17408	0.583891	0	1.94202	1.25266	up	0.63257	0.623125	no	chr14	34705432	34705614	-	1	circRNA	-	ENSSSCT00000031994	ATXN2	mRNA	chr14:34703061-34705431|chr14:34705614-34708845	ataxin 2 [Source:HGNC Symbol;Acc:HGNC:10555]	GO:0048471(perinuclear region of cytoplasm);GO:0030529(intracellular ribonucleoprotein complex);GO:0016020(membrane);GO:0010494(cytoplasmic stress granule);GO:0005844(polysome);GO:0005802(trans-Golgi network);GO:0005794(Golgi apparatus);GO:0005737(cytoplasm);GO:0034063(stress granule assembly);GO:0033962(cytoplasmic mRNA processing body assembly);GO:0010603(regulation of cytoplasmic mRNA processi…	NA
circRNA6929	3.49864	1.12378	1.85298	0	3.93925	4.47552	2.15847	2.80492	down	-0.377953	0.7098	no	chr14	34694120	34695463	-	2	circRNA	-	ENSSSCT00000031994	ATXN2	mRNA	chr14:34693493-34694119|chr14:34695463-34696914	ataxin 2 [Source:HGNC Symbol;Acc:HGNC:10555]	GO:0048471(perinuclear region of cytoplasm);GO:0030529(intracellular ribonucleoprotein complex);GO:0016020(membrane);GO:0010494(cytoplasmic stress granule);GO:0005844(polysome);GO:0005802(trans-Golgi network);GO:0005794(Golgi apparatus);GO:0005737(cytoplasm);GO:0034063(stress granule assembly);GO:0033962(cytoplasmic mRNA processing body assembly);GO:0010603(regulation of cytoplasmic mRNA processi…	NA
circRNA2230	2.97028	1.60284	3.85107	0	0	3.23315	2.80807	1.07772	up	1.3816	0.255809	no	chr18	44805458	44807387	+	2	circRNA	-	ENSSSCT00000029825	AVL9	mRNA	chr18:44796486-44805457|chr18:44807387-44811808	AVL9 cell migration associated [Source:HGNC Symbol;Acc:HGNC:28994]	GO:0055037(recycling endosome);GO:0005737(cytoplasm);GO:0051179(localization);GO:0016477(cell migration)	NA
circRNA4875	7.74282	1.96345	2.7195	1.60347	0.387145	0.995215	4.14193	0.995276	up	2.05713	0.221855	no	chr18	44782112	44784505	+	2	circRNA	-	ENSSSCT00000029825	AVL9	mRNA	chr18:44753509-44782111|chr18:44784505-44787540	AVL9 cell migration associated [Source:HGNC Symbol;Acc:HGNC:28994]	GO:0055037(recycling endosome);GO:0005737(cytoplasm);GO:0051179(localization);GO:0016477(cell migration)	NA
circRNA5018	0.367831	0.11815	1.63644	0	0.504752	0.427761	0.707475	0.310838	up	1.18652	0.493989	no	chr13	16474532	16526599	-	2	circRNA	-	ENSSSCT00000030647	AZI2	mRNA	chr13:16473811-16474531|chr13:16526599-16534384	5-azacytidine induced 2 [Source:HGNC Symbol;Acc:HGNC:24002]	GO:0005737(cytoplasm);GO:0097028(dendritic cell differentiation);GO:0044565(dendritic cell proliferation);GO:0042110(T cell activation);GO:0032640(tumor necrosis factor production);GO:0032635(interleukin-6 production);GO:0032609(interferon-gamma production);GO:0032607(interferon-alpha production);GO:0007249(I-kappaB kinase/NF-kappaB signaling);GO:0001816(cytokine production);GO:0000278(mitotic ce…	04622(RIG-I-like receptor signaling pathway)
circRNA5019	0	0	0.184448	0	0.796489	0	0.0614828	0.265496	down	-2.11044	0.525516	no	chr13	16526382	16526599	-	1	circRNA	-	ENSSSCT00000030647	AZI2	mRNA	chr13:16474657-16526381|chr13:16526599-16534384	5-azacytidine induced 2 [Source:HGNC Symbol;Acc:HGNC:24002]	GO:0005737(cytoplasm);GO:0097028(dendritic cell differentiation);GO:0044565(dendritic cell proliferation);GO:0042110(T cell activation);GO:0032640(tumor necrosis factor production);GO:0032635(interleukin-6 production);GO:0032609(interferon-gamma production);GO:0032607(interferon-alpha production);GO:0007249(I-kappaB kinase/NF-kappaB signaling);GO:0001816(cytokine production);GO:0000278(mitotic ce…	04622(RIG-I-like receptor signaling pathway)
circRNA1258	9.84597	4.87209	2.91743	20.5049	10.0279	6.87008	5.87849	12.4676	down	-1.08467	0.249767	no	chr4	37102480	37103948	+	3	circRNA	-	ENSSSCT00000024569	AZIN1	mRNA	chr4:37102004-37102479|chr4:37103948-37105765	antizyme inhibitor 1 [Source:HGNC Symbol;Acc:HGNC:16432]	GO:0005737(cytoplasm);GO:0005634(nucleus);GO:1902269(positive regulation of polyamine transmembrane transport);GO:0043085(positive regulation of catalytic activity);GO:0042177(negative regulation of protein catabolic process);GO:0033387(putrescine biosynthetic process from ornithine);GO:0006596(polyamine biosynthetic process);GO:0042978(ornithine decarboxylase activator activity);GO:0003824(catal…	NA
circRNA5922	3.03876	4.21661	2.89696	0	4.15707	1.27219	3.38411	1.80975	up	0.902984	0.329123	no	chr4	37097959	37099189	+	2	circRNA	-	ENSSSCT00000024569	AZIN1	mRNA	chr4:37095513-37097958|chr4:37099189-37101869	antizyme inhibitor 1 [Source:HGNC Symbol;Acc:HGNC:16432]	GO:0005737(cytoplasm);GO:0005634(nucleus);GO:1902269(positive regulation of polyamine transmembrane transport);GO:0043085(positive regulation of catalytic activity);GO:0042177(negative regulation of protein catabolic process);GO:0033387(putrescine biosynthetic process from ornithine);GO:0006596(polyamine biosynthetic process);GO:0042978(ornithine decarboxylase activator activity);GO:0003824(catal…	NA
circRNA1064	1.99372	2.81839	3.05932	1.95929	2.28359	3.01866	2.62381	2.42051	up	0.116349	0.674721	no	chr11	7809616	7822810	+	3	circRNA	-	ENSSSCT00000010230	B3GLCT	mRNA	chr11:7808850-7809615|chr11:7822810-7829087	beta 3-glucosyltransferase [Source:HGNC Symbol;Acc:HGNC:20207]	GO:0016020(membrane);GO:0016757(transferase activity, transferring glycosyl groups)	00514(Other types of O-glycan biosynthesis)
circRNA2448	9.89456	11.722	11.9676	6.5372	5.11593	4.74439	11.1947	5.46584	up	1.0343	0.00284802	yes	chr11	7796074	7822810	+	5	circRNA	-	ENSSSCT00000010230	B3GLCT	mRNA	chr11:7790530-7796073|chr11:7822810-7829087	beta 3-glucosyltransferase [Source:HGNC Symbol;Acc:HGNC:20207]	GO:0016020(membrane);GO:0016757(transferase activity, transferring glycosyl groups)	00514(Other types of O-glycan biosynthesis)
circRNA2449	18.0474	14.9293	15.4117	15.9261	3.05842	7.43361	16.1295	8.80605	up	0.873135	0.186255	no	chr11	7809616	7843556	+	7	circRNA	-	ENSSSCT00000010230	B3GLCT	mRNA	chr11:7808850-7809615|chr11:7843556-7854900	beta 3-glucosyltransferase [Source:HGNC Symbol;Acc:HGNC:20207]	GO:0016020(membrane);GO:0016757(transferase activity, transferring glycosyl groups)	00514(Other types of O-glycan biosynthesis)
circRNA3522	4.00777	3.3429	4.30191	4.72021	2.02289	3.75069	3.88419	3.49793	up	0.151113	0.681901	no	chr11	7809616	7830834	+	5	circRNA	-	ENSSSCT00000010230	B3GLCT	mRNA	chr11:7808850-7809615|chr11:7830834-7838684	beta 3-glucosyltransferase [Source:HGNC Symbol;Acc:HGNC:20207]	GO:0016020(membrane);GO:0016757(transferase activity, transferring glycosyl groups)	00514(Other types of O-glycan biosynthesis)
circRNA405	1.38395	3.01384	2.84355	2.96847	2.43968	3.6465	2.41378	3.01821	down	-0.322401	0.394718	no	chr11	7817381	7822810	+	2	circRNA	-	ENSSSCT00000010230	B3GLCT	mRNA	chr11:7809727-7817380|chr11:7822810-7829087	beta 3-glucosyltransferase [Source:HGNC Symbol;Acc:HGNC:20207]	GO:0016020(membrane);GO:0016757(transferase activity, transferring glycosyl groups)	00514(Other types of O-glycan biosynthesis)
circRNA4158	10.9439	12.2929	12.5715	6.60863	5.65245	4.60831	11.9361	5.62313	up	1.08589	0.00127995	yes	chr11	7796074	7817517	+	4	circRNA	-	ENSSSCT00000010230	B3GLCT	mRNA	chr11:7790530-7796073|chr11:7817517-7822746	beta 3-glucosyltransferase [Source:HGNC Symbol;Acc:HGNC:20207]	GO:0016020(membrane);GO:0016757(transferase activity, transferring glycosyl groups)	00514(Other types of O-glycan biosynthesis)
circRNA5136	4.27122	3.59361	4.54692	6.02985	2.02845	4.28313	4.13725	4.11381	up	0.00819874	0.985927	no	chr11	7817381	7830834	+	4	circRNA	-	ENSSSCT00000010230	B3GLCT	mRNA	chr11:7809727-7817380|chr11:7830834-7838684	beta 3-glucosyltransferase [Source:HGNC Symbol;Acc:HGNC:20207]	GO:0016020(membrane);GO:0016757(transferase activity, transferring glycosyl groups)	00514(Other types of O-glycan biosynthesis)
circRNA373	15.8818	15.0531	22.587	15.9642	17.0667	16.2591	17.8406	16.43	up	0.118837	0.615352	no	chr12	444014	447000	-	2	circRNA	-	ENSSSCT00000025124	B3GNTL1	mRNA	chr12:425926-444013|chr12:447000-457444	UDP-GlcNAc:betaGal beta-1,3-N-acetylglucosaminyltransferase-like 1 [Source:HGNC Symbol;Acc:HGNC:21727]	NA	NA
circRNA374	22.2967	20.7694	29.2274	15.2921	29.2431	15.9466	24.0978	20.1606	up	0.257363	0.503905	no	chr12	444014	457509	-	3	circRNA	-	ENSSSCT00000025124	B3GNTL1	mRNA	chr12:425926-444013|chr12:457509-476657	UDP-GlcNAc:betaGal beta-1,3-N-acetylglucosaminyltransferase-like 1 [Source:HGNC Symbol;Acc:HGNC:21727]	NA	NA
circRNA5178	4.82545	4.30545	4.77065	1.28923	4.98039	0.997625	4.63385	2.42242	up	0.935765	0.225161	no	chr10	37608253	37608488	+	1	circRNA	-	ENSSSCT00000012040	B4GALT1	mRNA	chr10:37574805-37608252|chr10:37608488-37623495	beta-1,4-galactosyltransferase 1 [Source:HGNC Symbol;Acc:HGNC:924]	GO:0070062(extracellular exosome);GO:0031526(brush border membrane);GO:0030112(glycocalyx);GO:0030057(desmosome);GO:0016323(basolateral plasma membrane);GO:0016021(integral component of membrane);GO:0016020(membrane);GO:0009986(cell surface);GO:0009897(external side of plasma membrane);GO:0005886(plasma membrane);GO:0005794(Golgi apparatus);GO:0005615(extracellular space);GO:0000138(Golgi trans c…	00052(Galactose metabolism);00510(N-Glycan biosynthesis);00514(Other types of O-glycan biosynthesis);00533(Glycosaminoglycan biosynthesis - keratan sulfate);00601(Glycosphingolipid biosynthesis - lacto and neolacto series)
circRNA5715	19.2581	13.4607	9.17972	8.00445	3.60755	11.8288	13.9662	7.81358	up	0.837882	0.180444	no	chr10	37623496	37628361	+	2	circRNA	-	ENSSSCT00000012040	B4GALT1	mRNA	chr10:37608488-37623495|chr10:37628361-37631618	beta-1,4-galactosyltransferase 1 [Source:HGNC Symbol;Acc:HGNC:924]	GO:0070062(extracellular exosome);GO:0031526(brush border membrane);GO:0030112(glycocalyx);GO:0030057(desmosome);GO:0016323(basolateral plasma membrane);GO:0016021(integral component of membrane);GO:0016020(membrane);GO:0009986(cell surface);GO:0009897(external side of plasma membrane);GO:0005886(plasma membrane);GO:0005794(Golgi apparatus);GO:0005615(extracellular space);GO:0000138(Golgi trans c…	00052(Galactose metabolism);00510(N-Glycan biosynthesis);00514(Other types of O-glycan biosynthesis);00533(Glycosaminoglycan biosynthesis - keratan sulfate);00601(Glycosphingolipid biosynthesis - lacto and neolacto series)
circRNA1199	8.9648	10.6366	20.5943	0	2.51373	2.89339	13.3986	1.80237	up	2.89411	0.0777701	no	chr6	108173849	108202404	-	3	circRNA	-	ENSSSCT00000029306	B4GALT6	mRNA	chr6:108165519-108173848|chr6:108202404-108219398	beta-1,4-galactosyltransferase 6 [Source:HGNC Symbol;Acc:HGNC:929]	GO:0005975(carbohydrate metabolic process);GO:0016757(transferase activity, transferring glycosyl groups)	00600(Sphingolipid metabolism)
circRNA1926	9.95746	11.8722	19.8357	0.643251	2.11784	2.17769	13.8885	1.64626	up	3.07662	0.0524793	no	chr6	108165403	108202404	-	4	circRNA	-	ENSSSCT00000029306	B4GALT6	mRNA	chr6:108161831-108165402|chr6:108202404-108219398	beta-1,4-galactosyltransferase 6 [Source:HGNC Symbol;Acc:HGNC:929]	GO:0005975(carbohydrate metabolic process);GO:0016757(transferase activity, transferring glycosyl groups)	00600(Sphingolipid metabolism)
circRNA6480	4.13868	3.63621	8.23923	0	2.5441	1.91103	5.33804	1.48504	up	1.8458	0.100506	no	chr6	108191915	108202404	-	2	circRNA	-	ENSSSCT00000029306	B4GALT6	mRNA	chr6:108173973-108191914|chr6:108202404-108219398	beta-1,4-galactosyltransferase 6 [Source:HGNC Symbol;Acc:HGNC:929]	GO:0005975(carbohydrate metabolic process);GO:0016757(transferase activity, transferring glycosyl groups)	00600(Sphingolipid metabolism)
circRNA1076	20.3277	27.0644	21.0777	9.94224	7.63229	11.0871	22.8233	9.55387	up	1.25635	0.0126015	yes	chr10	37486613	37494346	+	4	circRNA	-	ENSSSCT00000012037	BAG1	mRNA	chr10:37485085-37486612|chr10:37494346-37495861	BCL2 associated athanogene 1 [Source:HGNC Symbol;Acc:HGNC:937]	GO:0051087(chaperone binding)	NA
circRNA801	1.29319	2.49229	3.3192	1.95706	7.8123	7.56571	2.36823	5.77836	down	-1.28685	0.210238	no	chr10	37486613	37488301	+	2	circRNA	-	ENSSSCT00000012037	BAG1	mRNA	chr10:37485085-37486612|chr10:37488301-37491246	BCL2 associated athanogene 1 [Source:HGNC Symbol;Acc:HGNC:937]	GO:0051087(chaperone binding)	NA
circRNA1104	0	0.241515	0.375473	0	0.650062	0.741161	0.205663	0.463741	down	-1.17304	0.394368	no	chr15	129615579	129639319	-	5	circRNA	-	ENSSSCT00000017605	BARD1	mRNA	chr15:129597144-129615578|chr15:129639319-129641123	BRCA1 associated RING domain 1 [Source:HGNC Symbol;Acc:HGNC:952]	GO:0070531(BRCA1-A complex);GO:0031436(BRCA1-BARD1 complex);GO:0016607(nuclear speck);GO:0005737(cytoplasm);GO:0005634(nucleus);GO:0000932(P-body);GO:0085020(protein K6-linked ubiquitination);GO:0046826(negative regulation of protein export from nucleus);GO:0043066(negative regulation of apoptotic process);GO:0043065(positive regulation of apoptotic process);GO:0042325(regulation of phosphorylati…	NA
circRNA1759	0	0	0.276927	0	0.981195	0.999915	0.0923089	0.66037	down	-2.83873	0.22249	no	chr15	129622482	129639319	-	3	circRNA	-	ENSSSCT00000017605	BARD1	mRNA	chr15:129617412-129622481|chr15:129639319-129641123	BRCA1 associated RING domain 1 [Source:HGNC Symbol;Acc:HGNC:952]	GO:0070531(BRCA1-A complex);GO:0031436(BRCA1-BARD1 complex);GO:0016607(nuclear speck);GO:0005737(cytoplasm);GO:0005634(nucleus);GO:0000932(P-body);GO:0085020(protein K6-linked ubiquitination);GO:0046826(negative regulation of protein export from nucleus);GO:0043066(negative regulation of apoptotic process);GO:0043065(positive regulation of apoptotic process);GO:0042325(regulation of phosphorylati…	NA
circRNA3024	0	0.0839741	0	0	1.58218	0.831011	0.0279914	0.804396	down	-4.84485	0.231048	no	chr15	129617280	129622590	-	2	circRNA	-	ENSSSCT00000017605	BARD1	mRNA	chr15:129615671-129617279|chr15:129622590-129637140	BRCA1 associated RING domain 1 [Source:HGNC Symbol;Acc:HGNC:952]	GO:0070531(BRCA1-A complex);GO:0031436(BRCA1-BARD1 complex);GO:0016607(nuclear speck);GO:0005737(cytoplasm);GO:0005634(nucleus);GO:0000932(P-body);GO:0085020(protein K6-linked ubiquitination);GO:0046826(negative regulation of protein export from nucleus);GO:0043066(negative regulation of apoptotic process);GO:0043065(positive regulation of apoptotic process);GO:0042325(regulation of phosphorylati…	NA
circRNA12	11.0589	10.2435	14.5474	7.53336	6.02672	2.27304	11.9499	5.27771	up	1.17902	0.0323625	yes	chr7	69842801	69844102	+	2	circRNA	-	ENSSSCT00000002190	BAZ1A	mRNA	chr7:69814426-69842800|chr7:69844102-69846754	bromodomain adjacent to zinc finger domain 1A [Source:HGNC Symbol;Acc:HGNC:960]	GO:0008623(CHRAC);GO:0005634(nucleus);GO:0006261(DNA-dependent DNA replication);GO:0046872(metal ion binding);GO:0008270(zinc ion binding);GO:0005515(protein binding)	NA
circRNA13	6.7181	8.16247	6.4046	0.80451	2.25692	1.22285	7.09506	1.42809	up	2.31273	0.00148889	yes	chr7	69874055	69878724	+	2	circRNA	-	ENSSSCT00000002190	BAZ1A	mRNA	chr7:69870824-69874054|chr7:69878724-69881328	bromodomain adjacent to zinc finger domain 1A [Source:HGNC Symbol;Acc:HGNC:960]	GO:0008623(CHRAC);GO:0005634(nucleus);GO:0006261(DNA-dependent DNA replication);GO:0046872(metal ion binding);GO:0008270(zinc ion binding);GO:0005515(protein binding)	NA
circRNA3699	2.23164	1.03222	3.6593	0	0	0.498285	2.30772	0.166095	up	3.79639	0.0998914	no	chr7	69891210	69893132	+	3	circRNA	-	ENSSSCT00000002190	BAZ1A	mRNA	chr7:69885476-69891209|chr7:69893132-69895952	bromodomain adjacent to zinc finger domain 1A [Source:HGNC Symbol;Acc:HGNC:960]	GO:0008623(CHRAC);GO:0005634(nucleus);GO:0006261(DNA-dependent DNA replication);GO:0046872(metal ion binding);GO:0008270(zinc ion binding);GO:0005515(protein binding)	NA
circRNA565	4.45968	5.24432	2.30594	2.47848	1.5798	3.26999	4.00331	2.44276	up	0.712683	0.214608	no	chr7	69814148	69814426	+	1	circRNA	-	ENSSSCT00000002190	BAZ1A	mRNA	chr7:69800681-69814147|chr7:69814426-69842800	bromodomain adjacent to zinc finger domain 1A [Source:HGNC Symbol;Acc:HGNC:960]	GO:0008623(CHRAC);GO:0005634(nucleus);GO:0006261(DNA-dependent DNA replication);GO:0046872(metal ion binding);GO:0008270(zinc ion binding);GO:0005515(protein binding)	NA
circRNA2027	4.47342	0	0.406159	0	5.80131	0.148636	1.62653	1.98332	down	-0.286119	0.888849	no	chr3	10513862	10514059	-	1	circRNA	-	ENSSSCT00000030732	BAZ1B	mRNA	chr3:10502707-10513861|chr3:10514059-10516444	bromodomain adjacent to zinc finger domain 1B [Source:HGNC Symbol;Acc:HGNC:961]	GO:0043596(nuclear replication fork);GO:0016604(nuclear body);GO:0005721(pericentric heterochromatin);GO:0005634(nucleus);GO:0000793(condensed chromosome);GO:2000273(positive regulation of receptor activity);GO:0048096(chromatin-mediated maintenance of transcription);GO:0018108(peptidyl-tyrosine phosphorylation);GO:0016572(histone phosphorylation);GO:0006974(cellular response to DNA damage stimul…	NA
circRNA3199	7.5226	7.4038	7.17156	1.37034	0.590455	1.27859	7.36599	1.07979	up	2.77012	0.000347822	yes	chr3	10482501	10492534	-	5	circRNA	-	ENSSSCT00000030732	BAZ1B	mRNA	chr3:10480087-10482500|chr3:10492534-10501005	bromodomain adjacent to zinc finger domain 1B [Source:HGNC Symbol;Acc:HGNC:961]	GO:0043596(nuclear replication fork);GO:0016604(nuclear body);GO:0005721(pericentric heterochromatin);GO:0005634(nucleus);GO:0000793(condensed chromosome);GO:2000273(positive regulation of receptor activity);GO:0048096(chromatin-mediated maintenance of transcription);GO:0018108(peptidyl-tyrosine phosphorylation);GO:0016572(histone phosphorylation);GO:0006974(cellular response to DNA damage stimul…	NA
circRNA5949	7.69158	8.64703	7.14095	1.07145	1.03477	2.64834	7.82652	1.58485	up	2.30402	0.000971249	yes	chr3	10479905	10492534	-	6	circRNA	-	ENSSSCT00000030732	BAZ1B	mRNA	chr3:10470409-10479904|chr3:10492534-10501005	bromodomain adjacent to zinc finger domain 1B [Source:HGNC Symbol;Acc:HGNC:961]	GO:0043596(nuclear replication fork);GO:0016604(nuclear body);GO:0005721(pericentric heterochromatin);GO:0005634(nucleus);GO:0000793(condensed chromosome);GO:2000273(positive regulation of receptor activity);GO:0048096(chromatin-mediated maintenance of transcription);GO:0018108(peptidyl-tyrosine phosphorylation);GO:0016572(histone phosphorylation);GO:0006974(cellular response to DNA damage stimul…	NA
ciRNA189	0.392963	0.84148	0.291375	0	1.41031	0.152329	0.508606	0.520881	down	-0.0344064	0.98137	no	chr5	23614832	23615314	-	1	ciRNA	-	ENSSSCT00000032195	BAZ2A	mRNA	chr5:23614688-23615314	bromodomain adjacent to zinc finger domain 2A [Source:HGNC Symbol;Acc:HGNC:962]	GO:0016607(nuclear speck);GO:0005829(cytosol);GO:0005634(nucleus);GO:0046872(metal ion binding);GO:0042393(histone binding);GO:0008270(zinc ion binding);GO:0003677(DNA binding);GO:0001164(RNA polymerase I CORE element sequence-specific DNA binding)	NA
ciRNA7	0.370705	0.793818	0.274871	0	1.33043	0.143701	0.479798	0.491378	down	-0.0344064	0.98137	no	chr5	23614803	23615314	-	1	ciRNA	-	ENSSSCT00000032195	BAZ2A	mRNA	chr5:23614688-23615314	bromodomain adjacent to zinc finger domain 2A [Source:HGNC Symbol;Acc:HGNC:962]	GO:0016607(nuclear speck);GO:0005829(cytosol);GO:0005634(nucleus);GO:0046872(metal ion binding);GO:0042393(histone binding);GO:0008270(zinc ion binding);GO:0003677(DNA binding);GO:0001164(RNA polymerase I CORE element sequence-specific DNA binding)	NA
circRNA1099	0.68029	0	0.907962	0	0	0	0.529418	0	up	Inf	0.191765	no	chr15	73552151	73552402	-	2	circRNA	-	ENSSSCT00000017294	BAZ2B	mRNA	chr15:73548370-73552150|chr15:73552402-73557012	bromodomain adjacent to zinc finger domain 2B [Source:HGNC Symbol;Acc:HGNC:963]	GO:0005634(nucleus);GO:0046872(metal ion binding);GO:0008270(zinc ion binding);GO:0003677(DNA binding)	NA
circRNA3015	1.62223	6.62066	3.18403	0	0.36262	0	3.80897	0.120873	up	4.97783	0.128838	no	chr15	73548305	73552402	-	3	circRNA	-	ENSSSCT00000017294	BAZ2B	mRNA	chr15:73545942-73548304|chr15:73552402-73557012	bromodomain adjacent to zinc finger domain 2B [Source:HGNC Symbol;Acc:HGNC:963]	GO:0005634(nucleus);GO:0046872(metal ion binding);GO:0008270(zinc ion binding);GO:0003677(DNA binding)	NA
circRNA36	1.21138	0.424475	0.314959	2.05824	3.83607	1.92101	0.650271	2.60511	down	-2.00223	0.068799	no	chr6	26465042	26466884	+	3	circRNA	-	ENSSSCT00000024678	BBS2	mRNA	chr6:26463559-26465041|chr6:26466884-26472354	Bardet-Biedl syndrome 2 [Source:HGNC Symbol;Acc:HGNC:967]	GO:0060170(ciliary membrane);GO:0042995(cell projection);GO:0036064(ciliary basal body);GO:0034464(BBSome);GO:0032420(stereocilium);GO:0031514(motile cilium);GO:0016020(membrane);GO:0005929(cilium);GO:0005902(microvillus);GO:0005886(plasma membrane);GO:0005856(cytoskeleton);GO:0005815(microtubule organizing center);GO:0005737(cytoplasm);GO:1905515(non-motile cilium assembly);GO:1903441(protein lo…	NA
circRNA3726	0.323026	0.933822	0.747884	1.45259	1.46133	3.15551	0.668244	2.02314	down	-1.59815	0.1287	no	chr6	26460696	26462658	+	3	circRNA	-	ENSSSCT00000024678	BBS2	mRNA	chr6:26460149-26460695|chr6:26462658-26463429	Bardet-Biedl syndrome 2 [Source:HGNC Symbol;Acc:HGNC:967]	GO:0060170(ciliary membrane);GO:0042995(cell projection);GO:0036064(ciliary basal body);GO:0034464(BBSome);GO:0032420(stereocilium);GO:0031514(motile cilium);GO:0016020(membrane);GO:0005929(cilium);GO:0005902(microvillus);GO:0005886(plasma membrane);GO:0005856(cytoskeleton);GO:0005815(microtubule organizing center);GO:0005737(cytoplasm);GO:1905515(non-motile cilium assembly);GO:1903441(protein lo…	NA
circRNA4417	1.68614	2.04866	1.46768	3.55764	3.25014	3.5125	1.73416	3.44009	down	-0.988209	0.00254509	no	chr6	26453983	26462658	+	7	circRNA	-	ENSSSCT00000024678	BBS2	mRNA	chr6:26452450-26453982|chr6:26462658-26463429	Bardet-Biedl syndrome 2 [Source:HGNC Symbol;Acc:HGNC:967]	GO:0060170(ciliary membrane);GO:0042995(cell projection);GO:0036064(ciliary basal body);GO:0034464(BBSome);GO:0032420(stereocilium);GO:0031514(motile cilium);GO:0016020(membrane);GO:0005929(cilium);GO:0005902(microvillus);GO:0005886(plasma membrane);GO:0005856(cytoskeleton);GO:0005815(microtubule organizing center);GO:0005737(cytoplasm);GO:1905515(non-motile cilium assembly);GO:1903441(protein lo…	NA
circRNA5831	0.904402	0.713043	0.705434	1.53666	2.86397	1.95052	0.774293	2.11705	down	-1.4511	0.0719864	no	chr6	26463430	26466884	+	4	circRNA	-	ENSSSCT00000024678	BBS2	mRNA	chr6:26462658-26463429|chr6:26466884-26472354	Bardet-Biedl syndrome 2 [Source:HGNC Symbol;Acc:HGNC:967]	GO:0060170(ciliary membrane);GO:0042995(cell projection);GO:0036064(ciliary basal body);GO:0034464(BBSome);GO:0032420(stereocilium);GO:0031514(motile cilium);GO:0016020(membrane);GO:0005929(cilium);GO:0005902(microvillus);GO:0005886(plasma membrane);GO:0005856(cytoskeleton);GO:0005815(microtubule organizing center);GO:0005737(cytoplasm);GO:1905515(non-motile cilium assembly);GO:1903441(protein lo…	NA
circRNA2432	12.5173	10.2264	15.0462	2.1414	3.10216	0.189871	12.5967	1.81114	up	2.79807	0.00510808	yes	chr12	38836060	38864471	-	2	circRNA	-	ENSSSCT00000019240	BCAS3	mRNA	chr12:38801846-38836059|chr12:38864471-38893124	BCAS3, microtubule associated cell migration factor [Source:HGNC Symbol;Acc:HGNC:14347]	GO:0071944(cell periphery);GO:0045111(intermediate filament cytoskeleton);GO:0035327(transcriptionally active chromatin);GO:0031252(cell leading edge);GO:0005881(cytoplasmic microtubule);GO:0005737(cytoplasm);GO:0005730(nucleolus);GO:0005634(nucleus);GO:2000251(positive regulation of actin cytoskeleton reorganization);GO:2000114(regulation of establishment of cell polarity);GO:0090630(activation …	NA
circRNA3509	3.88379	2.91914	6.47947	3.87135	1.96781	1.08398	4.42747	2.30771	up	0.940018	0.19434	no	chr12	38659145	38687508	-	4	circRNA	-	ENSSSCT00000019240	BCAS3	mRNA	chr12:38632226-38659144|chr12:38687508-38713969	BCAS3, microtubule associated cell migration factor [Source:HGNC Symbol;Acc:HGNC:14347]	GO:0071944(cell periphery);GO:0045111(intermediate filament cytoskeleton);GO:0035327(transcriptionally active chromatin);GO:0031252(cell leading edge);GO:0005881(cytoplasmic microtubule);GO:0005737(cytoplasm);GO:0005730(nucleolus);GO:0005634(nucleus);GO:2000251(positive regulation of actin cytoskeleton reorganization);GO:2000114(regulation of establishment of cell polarity);GO:0090630(activation …	NA
circRNA3510	1.36912	1.24835	0.932305	0.965755	0.863473	0.168584	1.18326	0.665937	up	0.829306	0.16397	no	chr12	38757575	38801846	-	6	circRNA	-	ENSSSCT00000019240	BCAS3	mRNA	chr12:38732313-38757574|chr12:38801846-38836059	BCAS3, microtubule associated cell migration factor [Source:HGNC Symbol;Acc:HGNC:14347]	GO:0071944(cell periphery);GO:0045111(intermediate filament cytoskeleton);GO:0035327(transcriptionally active chromatin);GO:0031252(cell leading edge);GO:0005881(cytoplasmic microtubule);GO:0005737(cytoplasm);GO:0005730(nucleolus);GO:0005634(nucleus);GO:2000251(positive regulation of actin cytoskeleton reorganization);GO:2000114(regulation of establishment of cell polarity);GO:0090630(activation …	NA
circRNA6229	1.0231	1.02722	0.72365	1.38515	1.15485	0.241795	0.924655	0.927266	down	-0.0040679	0.994835	no	chr12	38757575	38784472	-	4	circRNA	-	ENSSSCT00000019240	BCAS3	mRNA	chr12:38732313-38757574|chr12:38784472-38799421	BCAS3, microtubule associated cell migration factor [Source:HGNC Symbol;Acc:HGNC:14347]	GO:0071944(cell periphery);GO:0045111(intermediate filament cytoskeleton);GO:0035327(transcriptionally active chromatin);GO:0031252(cell leading edge);GO:0005881(cytoplasmic microtubule);GO:0005737(cytoplasm);GO:0005730(nucleolus);GO:0005634(nucleus);GO:2000251(positive regulation of actin cytoskeleton reorganization);GO:2000114(regulation of establishment of cell polarity);GO:0090630(activation …	NA
circRNA6230	1.15807	1.30388	1.19118	1.35901	1.39613	0.297702	1.21771	1.01761	up	0.258983	0.635242	no	chr12	38779681	38801846	-	4	circRNA	-	ENSSSCT00000019240	BCAS3	mRNA	chr12:38771817-38779680|chr12:38801846-38836059	BCAS3, microtubule associated cell migration factor [Source:HGNC Symbol;Acc:HGNC:14347]	GO:0071944(cell periphery);GO:0045111(intermediate filament cytoskeleton);GO:0035327(transcriptionally active chromatin);GO:0031252(cell leading edge);GO:0005881(cytoplasmic microtubule);GO:0005737(cytoplasm);GO:0005730(nucleolus);GO:0005634(nucleus);GO:2000251(positive regulation of actin cytoskeleton reorganization);GO:2000114(regulation of establishment of cell polarity);GO:0090630(activation …	NA
circRNA6825	0.954974	0	3.4899	0	0	5.66387	1.48163	1.88796	down	-0.349646	0.862135	no	chr12	38713970	38714234	-	1	circRNA	-	ENSSSCT00000019240	BCAS3	mRNA	chr12:38687508-38713969|chr12:38714234-38732179	BCAS3, microtubule associated cell migration factor [Source:HGNC Symbol;Acc:HGNC:14347]	GO:0071944(cell periphery);GO:0045111(intermediate filament cytoskeleton);GO:0035327(transcriptionally active chromatin);GO:0031252(cell leading edge);GO:0005881(cytoplasmic microtubule);GO:0005737(cytoplasm);GO:0005730(nucleolus);GO:0005634(nucleus);GO:2000251(positive regulation of actin cytoskeleton reorganization);GO:2000114(regulation of establishment of cell polarity);GO:0090630(activation …	NA
circRNA6826	1.53146	3.90226	5.10999	1.05371	2.08695	0.446704	3.51457	1.19579	up	1.55539	0.14495	no	chr12	38732180	38784472	-	5	circRNA	-	ENSSSCT00000019240	BCAS3	mRNA	chr12:38714234-38732179|chr12:38784472-38799421	BCAS3, microtubule associated cell migration factor [Source:HGNC Symbol;Acc:HGNC:14347]	GO:0071944(cell periphery);GO:0045111(intermediate filament cytoskeleton);GO:0035327(transcriptionally active chromatin);GO:0031252(cell leading edge);GO:0005881(cytoplasmic microtubule);GO:0005737(cytoplasm);GO:0005730(nucleolus);GO:0005634(nucleus);GO:2000251(positive regulation of actin cytoskeleton reorganization);GO:2000114(regulation of establishment of cell polarity);GO:0090630(activation …	NA
circRNA1232	4.55286	4.70059	8.36137	12.1109	1.31069	3.46558	5.87161	5.62904	up	0.0608658	0.950186	no	chr5	72099959	72108057	+	2	circRNA	-	ENSSSCT00000031909	BCL2L13	mRNA	chr5:72095416-72099958|chr5:72108057-72110682	BCL2 like 13 [Source:HGNC Symbol;Acc:HGNC:17164]	GO:0016021(integral component of membrane);GO:0016020(membrane);GO:0005739(mitochondrion);GO:0042981(regulation of apoptotic process)	05134(Legionellosis)
circRNA1962	22.7466	17.5214	19.7721	12.2297	4.61668	5.06585	20.0134	7.30409	up	1.45419	0.0176765	yes	chr5	72062877	72095416	+	3	circRNA	-	ENSSSCT00000031909	BCL2L13	mRNA	None|chr5:72095416-72099958	BCL2 like 13 [Source:HGNC Symbol;Acc:HGNC:17164]	GO:0016021(integral component of membrane);GO:0016020(membrane);GO:0005739(mitochondrion);GO:0042981(regulation of apoptotic process)	05134(Legionellosis)
circRNA3149	4.79571	7.5499	6.45235	11.8878	2.41209	2.56752	6.26599	5.62245	up	0.156341	0.858747	no	chr5	72095260	72108057	+	3	circRNA	-	ENSSSCT00000031909	BCL2L13	mRNA	chr5:72090794-72095259|chr5:72108057-72110682	BCL2 like 13 [Source:HGNC Symbol;Acc:HGNC:17164]	GO:0016021(integral component of membrane);GO:0016020(membrane);GO:0005739(mitochondrion);GO:0042981(regulation of apoptotic process)	05134(Legionellosis)
circRNA4512	20.4895	17.9852	17.8825	11.3526	5.06291	5.13122	18.7857	7.18225	up	1.38713	0.0191129	yes	chr5	72062877	72100028	+	4	circRNA	-	ENSSSCT00000031909	BCL2L13	mRNA	None|chr5:72100028-72107913	BCL2 like 13 [Source:HGNC Symbol;Acc:HGNC:17164]	GO:0016021(integral component of membrane);GO:0016020(membrane);GO:0005739(mitochondrion);GO:0042981(regulation of apoptotic process)	05134(Legionellosis)
circRNA78	4.19891	7.16821	4.125	7.42687	3.49529	2.47739	5.16404	4.46651	up	0.209352	0.722581	no	chr5	72090687	72100028	+	3	circRNA	-	ENSSSCT00000031909	BCL2L13	mRNA	chr5:72063044-72090686|chr5:72100028-72107913	BCL2 like 13 [Source:HGNC Symbol;Acc:HGNC:17164]	GO:0016021(integral component of membrane);GO:0016020(membrane);GO:0005739(mitochondrion);GO:0042981(regulation of apoptotic process)	05134(Legionellosis)
circRNA1732	0.874156	0.894999	0.468767	0	0	0.304973	0.745974	0.101658	up	2.8754	0.0233754	yes	chr16	51837857	51839390	+	2	circRNA	-	ENSSSCT00000018477	BDP1	mRNA	chr16:51837358-51837856|chr16:51839390-51843803	B double prime 1, subunit of RNA polymerase III transcription initiation factor IIIB [Source:HGNC Symbol;Acc:HGNC:13652]	GO:0000126(transcription factor TFIIIB complex);GO:0070898(RNA polymerase III transcriptional preinitiation complex assembly);GO:0003677(DNA binding);GO:0001156(TFIIIC-class transcription factor binding)	NA
circRNA2538	2.15532	2.07691	1.13801	5.51239	0.346513	0.786649	1.79008	2.21518	down	-0.307403	0.822904	no	chr16	51757091	51763824	+	4	circRNA	-	ENSSSCT00000018477	BDP1	mRNA	chr16:51755488-51757090|chr16:51763824-51775687	B double prime 1, subunit of RNA polymerase III transcription initiation factor IIIB [Source:HGNC Symbol;Acc:HGNC:13652]	GO:0000126(transcription factor TFIIIB complex);GO:0070898(RNA polymerase III transcriptional preinitiation complex assembly);GO:0003677(DNA binding);GO:0001156(TFIIIC-class transcription factor binding)	NA
circRNA3583	0.72647	0.638271	1.22218	1.89163	0.44657	0.879618	0.862307	1.07261	down	-0.314845	0.685025	no	chr16	51757091	51761357	+	3	circRNA	-	ENSSSCT00000018477	BDP1	mRNA	chr16:51755488-51757090|chr16:51761357-51763729	B double prime 1, subunit of RNA polymerase III transcription initiation factor IIIB [Source:HGNC Symbol;Acc:HGNC:13652]	GO:0000126(transcription factor TFIIIB complex);GO:0070898(RNA polymerase III transcriptional preinitiation complex assembly);GO:0003677(DNA binding);GO:0001156(TFIIIC-class transcription factor binding)	NA
circRNA3584	3.48579	2.12734	0.221541	0.457187	1.91333	4.62123	1.94489	2.33058	down	-0.261001	0.815795	no	chr16	51828982	51829999	+	2	circRNA	-	ENSSSCT00000018477	BDP1	mRNA	chr16:51827748-51828981|chr16:51829999-51830096	B double prime 1, subunit of RNA polymerase III transcription initiation factor IIIB [Source:HGNC Symbol;Acc:HGNC:13652]	GO:0000126(transcription factor TFIIIB complex);GO:0070898(RNA polymerase III transcriptional preinitiation complex assembly);GO:0003677(DNA binding);GO:0001156(TFIIIC-class transcription factor binding)	NA
circRNA5254	3.91957	2.5864	7.83887	2.0675	0.485691	0.832362	4.78162	1.12852	up	2.08307	0.136923	no	chr16	51839192	51845416	+	3	circRNA	-	ENSSSCT00000018477	BDP1	mRNA	chr16:51838043-51839191|chr16:51845416-51847780	B double prime 1, subunit of RNA polymerase III transcription initiation factor IIIB [Source:HGNC Symbol;Acc:HGNC:13652]	GO:0000126(transcription factor TFIIIB complex);GO:0070898(RNA polymerase III transcriptional preinitiation complex assembly);GO:0003677(DNA binding);GO:0001156(TFIIIC-class transcription factor binding)	NA
circRNA6299	3.06972	3.04678	0.702354	9.30046	0.466603	1.39225	2.27295	3.71977	down	-0.710646	0.662481	no	chr16	51761224	51763824	+	2	circRNA	-	ENSSSCT00000018477	BDP1	mRNA	chr16:51760007-51761223|chr16:51763824-51775687	B double prime 1, subunit of RNA polymerase III transcription initiation factor IIIB [Source:HGNC Symbol;Acc:HGNC:13652]	GO:0000126(transcription factor TFIIIB complex);GO:0070898(RNA polymerase III transcriptional preinitiation complex assembly);GO:0003677(DNA binding);GO:0001156(TFIIIC-class transcription factor binding)	NA
circRNA1315	10.4398	7.26738	5.85837	3.52617	3.05165	1.12068	7.85517	2.56617	up	1.61403	0.0397718	yes	chr3	114030015	114039242	-	4	circRNA	-	ENSSSCT00000009316	BIRC6	mRNA	chr3:114027542-114030014|chr3:114039242-114039949	baculoviral IAP repeat containing 6 [Source:HGNC Symbol;Acc:HGNC:13516]	GO:0043231(intracellular membrane-bounded organelle);GO:0030496(midbody);GO:0016020(membrane);GO:0005815(microtubule organizing center);GO:0005802(trans-Golgi network);GO:0005794(Golgi apparatus);GO:0005768(endosome);GO:0005737(cytoplasm);GO:0000922(spindle pole);GO:2001237(negative regulation of extrinsic apoptotic signaling pathway);GO:0060712(spongiotrophoblast layer development);GO:0060711(la…	04120(Ubiquitin mediated proteolysis)
circRNA2059	1.29494	1.65783	2.39848	2.38505	0.679542	1.98781	1.78375	1.68414	up	0.0829031	0.879396	no	chr3	113974245	113977210	-	2	circRNA	-	ENSSSCT00000009316	BIRC6	mRNA	chr3:113972075-113974244|chr3:113977210-113980292	baculoviral IAP repeat containing 6 [Source:HGNC Symbol;Acc:HGNC:13516]	GO:0043231(intracellular membrane-bounded organelle);GO:0030496(midbody);GO:0016020(membrane);GO:0005815(microtubule organizing center);GO:0005802(trans-Golgi network);GO:0005794(Golgi apparatus);GO:0005768(endosome);GO:0005737(cytoplasm);GO:0000922(spindle pole);GO:2001237(negative regulation of extrinsic apoptotic signaling pathway);GO:0060712(spongiotrophoblast layer development);GO:0060711(la…	04120(Ubiquitin mediated proteolysis)
circRNA2788	6.90529	9.18873	5.69155	4.17254	1.55797	2.32071	7.26186	2.68374	up	1.43609	0.0265349	yes	chr3	113999359	114020837	-	4	circRNA	-	ENSSSCT00000009316	BIRC6	mRNA	chr3:113981718-113999358|chr3:114020837-114024566	baculoviral IAP repeat containing 6 [Source:HGNC Symbol;Acc:HGNC:13516]	GO:0043231(intracellular membrane-bounded organelle);GO:0030496(midbody);GO:0016020(membrane);GO:0005815(microtubule organizing center);GO:0005802(trans-Golgi network);GO:0005794(Golgi apparatus);GO:0005768(endosome);GO:0005737(cytoplasm);GO:0000922(spindle pole);GO:2001237(negative regulation of extrinsic apoptotic signaling pathway);GO:0060712(spongiotrophoblast layer development);GO:0060711(la…	04120(Ubiquitin mediated proteolysis)
circRNA3225	4.32744	4.5118	4.94322	1.19775	0.906772	0.710998	4.59415	0.938506	up	2.29136	0.000138778	yes	chr3	113999359	114016670	-	3	circRNA	-	ENSSSCT00000009316	BIRC6	mRNA	chr3:113981718-113999358|chr3:114016670-114020619	baculoviral IAP repeat containing 6 [Source:HGNC Symbol;Acc:HGNC:13516]	GO:0043231(intracellular membrane-bounded organelle);GO:0030496(midbody);GO:0016020(membrane);GO:0005815(microtubule organizing center);GO:0005802(trans-Golgi network);GO:0005794(Golgi apparatus);GO:0005768(endosome);GO:0005737(cytoplasm);GO:0000922(spindle pole);GO:2001237(negative regulation of extrinsic apoptotic signaling pathway);GO:0060712(spongiotrophoblast layer development);GO:0060711(la…	04120(Ubiquitin mediated proteolysis)
circRNA3226	3.502	3.49334	2.91758	0.747563	0.0292692	1.04262	3.30431	0.606485	up	2.4458	0.00305095	yes	chr3	114041982	114049273	-	4	circRNA	-	ENSSSCT00000009316	BIRC6	mRNA	chr3:114040093-114041981|chr3:114049273-114050542	baculoviral IAP repeat containing 6 [Source:HGNC Symbol;Acc:HGNC:13516]	GO:0043231(intracellular membrane-bounded organelle);GO:0030496(midbody);GO:0016020(membrane);GO:0005815(microtubule organizing center);GO:0005802(trans-Golgi network);GO:0005794(Golgi apparatus);GO:0005768(endosome);GO:0005737(cytoplasm);GO:0000922(spindle pole);GO:2001237(negative regulation of extrinsic apoptotic signaling pathway);GO:0060712(spongiotrophoblast layer development);GO:0060711(la…	04120(Ubiquitin mediated proteolysis)
circRNA4641	5.4676	6.88827	4.34188	1.06835	0.494902	0.790971	5.56592	0.784741	up	2.82633	0.0188726	yes	chr3	114039113	114078537	-	22	circRNA	-	ENSSSCT00000009316	BIRC6	mRNA	chr3:114032423-114039112|chr3:114078537-114079348	baculoviral IAP repeat containing 6 [Source:HGNC Symbol;Acc:HGNC:13516]	GO:0043231(intracellular membrane-bounded organelle);GO:0030496(midbody);GO:0016020(membrane);GO:0005815(microtubule organizing center);GO:0005802(trans-Golgi network);GO:0005794(Golgi apparatus);GO:0005768(endosome);GO:0005737(cytoplasm);GO:0000922(spindle pole);GO:2001237(negative regulation of extrinsic apoptotic signaling pathway);GO:0060712(spongiotrophoblast layer development);GO:0060711(la…	04120(Ubiquitin mediated proteolysis)
circRNA4642	1.57495	0.296127	1.46484	0.604586	0	0.402048	1.11197	0.335545	up	1.72854	0.189168	no	chr3	114048665	114049273	-	2	circRNA	-	ENSSSCT00000009316	BIRC6	mRNA	chr3:114044616-114048664|chr3:114049273-114050542	baculoviral IAP repeat containing 6 [Source:HGNC Symbol;Acc:HGNC:13516]	GO:0043231(intracellular membrane-bounded organelle);GO:0030496(midbody);GO:0016020(membrane);GO:0005815(microtubule organizing center);GO:0005802(trans-Golgi network);GO:0005794(Golgi apparatus);GO:0005768(endosome);GO:0005737(cytoplasm);GO:0000922(spindle pole);GO:2001237(negative regulation of extrinsic apoptotic signaling pathway);GO:0060712(spongiotrophoblast layer development);GO:0060711(la…	04120(Ubiquitin mediated proteolysis)
circRNA4643	2.89937	2.04361	1.32901	1.70199	0.225426	0.222484	2.09066	0.716634	up	1.54465	0.110027	no	chr3	114074966	114078537	-	3	circRNA	-	ENSSSCT00000009316	BIRC6	mRNA	chr3:114074200-114074965|chr3:114078537-114079348	baculoviral IAP repeat containing 6 [Source:HGNC Symbol;Acc:HGNC:13516]	GO:0043231(intracellular membrane-bounded organelle);GO:0030496(midbody);GO:0016020(membrane);GO:0005815(microtubule organizing center);GO:0005802(trans-Golgi network);GO:0005794(Golgi apparatus);GO:0005768(endosome);GO:0005737(cytoplasm);GO:0000922(spindle pole);GO:2001237(negative regulation of extrinsic apoptotic signaling pathway);GO:0060712(spongiotrophoblast layer development);GO:0060711(la…	04120(Ubiquitin mediated proteolysis)
circRNA4644	3.08377	1.62957	1.42251	0	0	0	2.04529	0	up	Inf	0.0595332	no	chr3	114091253	114091857	-	2	circRNA	-	ENSSSCT00000009316	BIRC6	mRNA	chr3:114090389-114091252|chr3:114091857-114094752	baculoviral IAP repeat containing 6 [Source:HGNC Symbol;Acc:HGNC:13516]	GO:0043231(intracellular membrane-bounded organelle);GO:0030496(midbody);GO:0016020(membrane);GO:0005815(microtubule organizing center);GO:0005802(trans-Golgi network);GO:0005794(Golgi apparatus);GO:0005768(endosome);GO:0005737(cytoplasm);GO:0000922(spindle pole);GO:2001237(negative regulation of extrinsic apoptotic signaling pathway);GO:0060712(spongiotrophoblast layer development);GO:0060711(la…	04120(Ubiquitin mediated proteolysis)
circRNA5533	7.16801	7.554	7.95207	1.72437	2.07032	3.23186	7.55803	2.34218	up	1.69015	0.00219454	yes	chr3	113976993	113999569	-	4	circRNA	-	ENSSSCT00000009316	BIRC6	mRNA	chr3:113974406-113976992|chr3:113999569-114015537	baculoviral IAP repeat containing 6 [Source:HGNC Symbol;Acc:HGNC:13516]	GO:0043231(intracellular membrane-bounded organelle);GO:0030496(midbody);GO:0016020(membrane);GO:0005815(microtubule organizing center);GO:0005802(trans-Golgi network);GO:0005794(Golgi apparatus);GO:0005768(endosome);GO:0005737(cytoplasm);GO:0000922(spindle pole);GO:2001237(negative regulation of extrinsic apoptotic signaling pathway);GO:0060712(spongiotrophoblast layer development);GO:0060711(la…	04120(Ubiquitin mediated proteolysis)
circRNA5534	0.916638	1.19396	1.06069	1.02812	0.19218	1.23066	1.0571	0.816987	up	0.371722	0.532481	no	chr3	114077581	114079564	-	3	circRNA	-	ENSSSCT00000009316	BIRC6	mRNA	chr3:114075099-114077580|chr3:114079564-114080873	baculoviral IAP repeat containing 6 [Source:HGNC Symbol;Acc:HGNC:13516]	GO:0043231(intracellular membrane-bounded organelle);GO:0030496(midbody);GO:0016020(membrane);GO:0005815(microtubule organizing center);GO:0005802(trans-Golgi network);GO:0005794(Golgi apparatus);GO:0005768(endosome);GO:0005737(cytoplasm);GO:0000922(spindle pole);GO:2001237(negative regulation of extrinsic apoptotic signaling pathway);GO:0060712(spongiotrophoblast layer development);GO:0060711(la…	04120(Ubiquitin mediated proteolysis)
circRNA6585	1.31875	2.23316	3.76638	2.11755	0.510217	1.64783	2.43943	1.4252	up	0.775381	0.311808	no	chr3	113974245	113981718	-	4	circRNA	-	ENSSSCT00000009316	BIRC6	mRNA	chr3:113972075-113974244|chr3:113981718-113999358	baculoviral IAP repeat containing 6 [Source:HGNC Symbol;Acc:HGNC:13516]	GO:0043231(intracellular membrane-bounded organelle);GO:0030496(midbody);GO:0016020(membrane);GO:0005815(microtubule organizing center);GO:0005802(trans-Golgi network);GO:0005794(Golgi apparatus);GO:0005768(endosome);GO:0005737(cytoplasm);GO:0000922(spindle pole);GO:2001237(negative regulation of extrinsic apoptotic signaling pathway);GO:0060712(spongiotrophoblast layer development);GO:0060711(la…	04120(Ubiquitin mediated proteolysis)
circRNA6586	2.8379	1.00354	1.14176	0	0	2.25872	1.66107	0.752906	up	1.14157	0.398962	no	chr3	114071752	114075099	-	3	circRNA	-	ENSSSCT00000009316	BIRC6	mRNA	chr3:114068581-114071751|chr3:114075099-114077580	baculoviral IAP repeat containing 6 [Source:HGNC Symbol;Acc:HGNC:13516]	GO:0043231(intracellular membrane-bounded organelle);GO:0030496(midbody);GO:0016020(membrane);GO:0005815(microtubule organizing center);GO:0005802(trans-Golgi network);GO:0005794(Golgi apparatus);GO:0005768(endosome);GO:0005737(cytoplasm);GO:0000922(spindle pole);GO:2001237(negative regulation of extrinsic apoptotic signaling pathway);GO:0060712(spongiotrophoblast layer development);GO:0060711(la…	04120(Ubiquitin mediated proteolysis)
circRNA1107	187.633	145.671	136.225	419.033	393.955	289.624	156.509	367.537	down	-1.23164	0.0216489	yes	chr14	6917870	6918083	+	1	circRNA	-	ENSSSCT00000010546	BMP1	mRNA	chr14:6917526-6917869|chr14:6918083-6919932	bone morphogenetic protein 1 [Source:HGNC Symbol;Acc:HGNC:1067]	GO:0005615(extracellular space);GO:0061036(positive regulation of cartilage development);GO:0006508(proteolysis);GO:0046872(metal ion binding);GO:0016787(hydrolase activity);GO:0008270(zinc ion binding);GO:0008237(metallopeptidase activity);GO:0008233(peptidase activity);GO:0005509(calcium ion binding);GO:0004222(metalloendopeptidase activity)	NA
circRNA4281	192.391	188.719	182.707	439.322	358.126	274.938	187.939	357.462	down	-0.927525	0.0697066	no	chr14	6906858	6907564	+	2	circRNA	-	ENSSSCT00000010546	BMP1	mRNA	chr14:6905733-6906857|chr14:6907564-6911689	bone morphogenetic protein 1 [Source:HGNC Symbol;Acc:HGNC:1067]	GO:0005615(extracellular space);GO:0061036(positive regulation of cartilage development);GO:0006508(proteolysis);GO:0046872(metal ion binding);GO:0016787(hydrolase activity);GO:0008270(zinc ion binding);GO:0008237(metallopeptidase activity);GO:0008233(peptidase activity);GO:0005509(calcium ion binding);GO:0004222(metalloendopeptidase activity)	NA
circRNA5369	1.84991	2.49565	4.99683	4.40778	0.937299	1.33381	3.11413	2.2263	up	0.484184	0.575822	no	chr14	95260296	95267183	+	3	circRNA	-	ENSSSCT00000011342	BMPR1A	mRNA	chr14:95253340-95260295|chr14:95267183-95271586	bone morphogenetic protein receptor type 1A [Source:HGNC Symbol;Acc:HGNC:1076]	GO:0016021(integral component of membrane);GO:0016020(membrane);GO:0009897(external side of plasma membrane);GO:0005901(caveola);GO:0005886(plasma membrane);GO:2000772(regulation of cellular senescence);GO:1905285(fibrous ring of heart morphogenesis);GO:1904707(positive regulation of vascular smooth muscle cell proliferation);GO:1904414(positive regulation of cardiac ventricle development);GO:190…	04350(TGF-beta signaling pathway);04390(Hippo signaling pathway);04060(Cytokine-cytokine receptor interaction);04550(Signaling pathways regulating pluripotency of stem cells)
circRNA6947	2.53169	2.09804	6.78208	1.80968	0.384821	1.99615	3.80394	1.39688	up	1.44528	0.243829	no	chr14	95260296	95273617	+	5	circRNA	-	ENSSSCT00000011342	BMPR1A	mRNA	chr14:95253340-95260295|chr14:95273617-95278342	bone morphogenetic protein receptor type 1A [Source:HGNC Symbol;Acc:HGNC:1076]	GO:0016021(integral component of membrane);GO:0016020(membrane);GO:0009897(external side of plasma membrane);GO:0005901(caveola);GO:0005886(plasma membrane);GO:2000772(regulation of cellular senescence);GO:1905285(fibrous ring of heart morphogenesis);GO:1904707(positive regulation of vascular smooth muscle cell proliferation);GO:1904414(positive regulation of cardiac ventricle development);GO:190…	04350(TGF-beta signaling pathway);04390(Hippo signaling pathway);04060(Cytokine-cytokine receptor interaction);04550(Signaling pathways regulating pluripotency of stem cells)
circRNA1567	18.7685	19.0886	14.119	1.07417	4.34411	2.76203	17.3254	2.72677	up	2.66762	0.00328767	yes	chr8	133864713	133865560	-	2	circRNA	-	ENSSSCT00000028459	BMPR1B	mRNA	chr8:133832197-133864712|chr8:133865560-133875350	bone morphogenetic protein receptor type 1B [Source:HGNC Symbol;Acc:HGNC:1077]	GO:0016021(integral component of membrane);GO:0016020(membrane);GO:0023014(signal transduction by protein phosphorylation);GO:0016310(phosphorylation);GO:0007178(transmembrane receptor protein serine/threonine kinase signaling pathway);GO:0006468(protein phosphorylation);GO:0016740(transferase activity);GO:0016301(kinase activity);GO:0005524(ATP binding);GO:0004702(signal transducer, downstream o…	NA
circRNA1568	140.165	131.283	136.346	3.93134	3.52558	2.68903	135.931	3.38198	up	5.32887	0.000294905	yes	chr8	133985141	134040905	-	2	circRNA	-	ENSSSCT00000034827	BMPR1B	mRNA	chr8:133875510-133985140|None	bone morphogenetic protein receptor type 1B [Source:HGNC Symbol;Acc:HGNC:1077]	GO:0016021(integral component of membrane);GO:0016020(membrane);GO:0023014(signal transduction by protein phosphorylation);GO:0016310(phosphorylation);GO:0007178(transmembrane receptor protein serine/threonine kinase signaling pathway);GO:0006468(protein phosphorylation);GO:0016740(transferase activity);GO:0016301(kinase activity);GO:0005524(ATP binding);GO:0004702(signal transducer, downstream o…	NA
circRNA2329	96.4461	184.815	147.086	0	1.3052	3.64279	142.783	1.64933	up	6.4358	0.0311762	yes	chr8	133746205	133751072	-	2	circRNA	-	ENSSSCT00000028459	BMPR1B	mRNA	chr8:133744655-133746204|chr8:133751072-133765369	bone morphogenetic protein receptor type 1B [Source:HGNC Symbol;Acc:HGNC:1077]	GO:0016021(integral component of membrane);GO:0016020(membrane);GO:0023014(signal transduction by protein phosphorylation);GO:0016310(phosphorylation);GO:0007178(transmembrane receptor protein serine/threonine kinase signaling pathway);GO:0006468(protein phosphorylation);GO:0016740(transferase activity);GO:0016301(kinase activity);GO:0005524(ATP binding);GO:0004702(signal transducer, downstream o…	NA
circRNA327	77.7681	86.1823	76.5377	0.604586	2.44504	2.15766	80.1627	1.73576	up	5.52929	0.00107188	yes	chr8	133864713	133875510	-	3	circRNA	-	ENSSSCT00000035574	BMPR1B	mRNA	None|chr8:133875510-133892469	bone morphogenetic protein receptor type 1B [Source:HGNC Symbol;Acc:HGNC:1077]	GO:0016021(integral component of membrane);GO:0016020(membrane);GO:0023014(signal transduction by protein phosphorylation);GO:0016310(phosphorylation);GO:0007178(transmembrane receptor protein serine/threonine kinase signaling pathway);GO:0006468(protein phosphorylation);GO:0016740(transferase activity);GO:0016301(kinase activity);GO:0005524(ATP binding);GO:0004702(signal transducer, downstream o…	NA
circRNA4072	536.028	597.53	527.757	7.11995	8.25728	5.19227	553.771	6.8565	up	6.33567	0.00159102	yes	chr8	133864713	133985235	-	4	circRNA	-	ENSSSCT00000034827	BMPR1B	mRNA	None|chr8:133985235-134040803	bone morphogenetic protein receptor type 1B [Source:HGNC Symbol;Acc:HGNC:1077]	GO:0016021(integral component of membrane);GO:0016020(membrane);GO:0023014(signal transduction by protein phosphorylation);GO:0016310(phosphorylation);GO:0007178(transmembrane receptor protein serine/threonine kinase signaling pathway);GO:0006468(protein phosphorylation);GO:0016740(transferase activity);GO:0016301(kinase activity);GO:0005524(ATP binding);GO:0004702(signal transducer, downstream o…	NA
circRNA5007	860.798	960.116	844.93	12.004	12.4137	7.90569	888.615	10.7745	up	6.36587	0.00165715	yes	chr8	133875351	133985235	-	2	circRNA	-	ENSSSCT00000034827	BMPR1B	mRNA	chr8:133865560-133875350|chr8:133985235-134040803	bone morphogenetic protein receptor type 1B [Source:HGNC Symbol;Acc:HGNC:1077]	GO:0016021(integral component of membrane);GO:0016020(membrane);GO:0023014(signal transduction by protein phosphorylation);GO:0016310(phosphorylation);GO:0007178(transmembrane receptor protein serine/threonine kinase signaling pathway);GO:0006468(protein phosphorylation);GO:0016740(transferase activity);GO:0016301(kinase activity);GO:0005524(ATP binding);GO:0004702(signal transducer, downstream o…	NA
circRNA2574	3.1166	6.20664	4.75386	2.58885	3.81615	6.3789	4.69237	4.2613	up	0.139023	0.778698	no	chr15	117561052	117562288	+	2	circRNA	-	ENSSSCT00000017544	BMPR2	mRNA	chr15:117533003-117561051|chr15:117562288-117564757	bone morphogenetic protein receptor type II [Source:HGNC Symbol;Acc:HGNC:1078]	GO:0016021(integral component of membrane);GO:0016020(membrane);GO:0023014(signal transduction by protein phosphorylation);GO:0016310(phosphorylation);GO:0007178(transmembrane receptor protein serine/threonine kinase signaling pathway);GO:0006468(protein phosphorylation);GO:0016740(transferase activity);GO:0016301(kinase activity);GO:0005524(ATP binding);GO:0004702(signal transducer, downstream o…	04350(TGF-beta signaling pathway);04390(Hippo signaling pathway);04060(Cytokine-cytokine receptor interaction);04550(Signaling pathways regulating pluripotency of stem cells);05206(MicroRNAs in cancer)
circRNA5757	3.08319	3.92174	3.52717	7.84503	6.79542	6.10972	3.5107	6.91673	down	-0.978331	0.0100641	no	chr15	117531248	117533003	+	2	circRNA	-	ENSSSCT00000017544	BMPR2	mRNA	chr15:117426867-117531247|chr15:117533003-117561051	bone morphogenetic protein receptor type II [Source:HGNC Symbol;Acc:HGNC:1078]	GO:0016021(integral component of membrane);GO:0016020(membrane);GO:0023014(signal transduction by protein phosphorylation);GO:0016310(phosphorylation);GO:0007178(transmembrane receptor protein serine/threonine kinase signaling pathway);GO:0006468(protein phosphorylation);GO:0016740(transferase activity);GO:0016301(kinase activity);GO:0005524(ATP binding);GO:0004702(signal transducer, downstream o…	04350(TGF-beta signaling pathway);04390(Hippo signaling pathway);04060(Cytokine-cytokine receptor interaction);04550(Signaling pathways regulating pluripotency of stem cells);05206(MicroRNAs in cancer)
circRNA2866	2.03834	4.83491	0	3.08474	0.993049	1.28551	2.29108	1.78776	up	0.357874	0.767388	no	chr18	9562088	9563293	+	2	circRNA	-	ENSSSCT00000017958	BRAF	mRNA	chr18:9559965-9562087|chr18:9563293-9569858	B-Raf proto-oncogene, serine/threonine kinase [Source:HGNC Symbol;Acc:HGNC:1097]	GO:0044297(cell body);GO:0043231(intracellular membrane-bounded organelle);GO:0043005(neuron projection);GO:0005886(plasma membrane);GO:0005829(cytosol);GO:0005739(mitochondrion);GO:0005737(cytoplasm);GO:0005622(intracellular);GO:2000352(negative regulation of endothelial cell apoptotic process);GO:2000301(negative regulation of synaptic vesicle exocytosis);GO:1900026(positive regulation of subst…	04015(Rap1 signaling pathway);04010(MAPK signaling pathway);04012(ErbB signaling pathway);04068(FoxO signaling pathway);04024(cAMP signaling pathway);04150(mTOR signaling pathway);04810(Regulation of actin cytoskeleton);04510(Focal adhesion);04650(Natural killer cell mediated cytotoxicity);04062(Chemokine signaling pathway);04910(Insulin signaling pathway);04914(Progesterone-mediated oocyte matur…
circRNA3348	7.28196	10.2562	11.2668	4.22553	2.78065	2.45249	9.60167	3.15289	up	1.60661	0.0190789	yes	chr18	9569859	9622572	+	12	circRNA	-	ENSSSCT00000017958	BRAF	mRNA	chr18:9563293-9569858|chr18:9622572-9629343	B-Raf proto-oncogene, serine/threonine kinase [Source:HGNC Symbol;Acc:HGNC:1097]	GO:0044297(cell body);GO:0043231(intracellular membrane-bounded organelle);GO:0043005(neuron projection);GO:0005886(plasma membrane);GO:0005829(cytosol);GO:0005739(mitochondrion);GO:0005737(cytoplasm);GO:0005622(intracellular);GO:2000352(negative regulation of endothelial cell apoptotic process);GO:2000301(negative regulation of synaptic vesicle exocytosis);GO:1900026(positive regulation of subst…	04015(Rap1 signaling pathway);04010(MAPK signaling pathway);04012(ErbB signaling pathway);04068(FoxO signaling pathway);04024(cAMP signaling pathway);04150(mTOR signaling pathway);04810(Regulation of actin cytoskeleton);04510(Focal adhesion);04650(Natural killer cell mediated cytotoxicity);04062(Chemokine signaling pathway);04910(Insulin signaling pathway);04914(Progesterone-mediated oocyte matur…
circRNA3349	2.03978	3.58595	2.94904	1.36254	2.83199	2.48484	2.85826	2.22646	up	0.360387	0.373228	no	chr18	9569859	9588258	+	7	circRNA	-	ENSSSCT00000017958	BRAF	mRNA	chr18:9563293-9569858|chr18:9588258-9603360	B-Raf proto-oncogene, serine/threonine kinase [Source:HGNC Symbol;Acc:HGNC:1097]	GO:0044297(cell body);GO:0043231(intracellular membrane-bounded organelle);GO:0043005(neuron projection);GO:0005886(plasma membrane);GO:0005829(cytosol);GO:0005739(mitochondrion);GO:0005737(cytoplasm);GO:0005622(intracellular);GO:2000352(negative regulation of endothelial cell apoptotic process);GO:2000301(negative regulation of synaptic vesicle exocytosis);GO:1900026(positive regulation of subst…	04015(Rap1 signaling pathway);04010(MAPK signaling pathway);04012(ErbB signaling pathway);04068(FoxO signaling pathway);04024(cAMP signaling pathway);04150(mTOR signaling pathway);04810(Regulation of actin cytoskeleton);04510(Focal adhesion);04650(Natural killer cell mediated cytotoxicity);04062(Chemokine signaling pathway);04910(Insulin signaling pathway);04914(Progesterone-mediated oocyte matur…
circRNA3984	2.51937	3.00207	3.50312	1.59979	3.66214	3.05704	3.00819	2.77299	up	0.117453	0.751768	no	chr18	9569859	9583462	+	5	circRNA	-	ENSSSCT00000017958	BRAF	mRNA	chr18:9563293-9569858|chr18:9583462-9586582	B-Raf proto-oncogene, serine/threonine kinase [Source:HGNC Symbol;Acc:HGNC:1097]	GO:0044297(cell body);GO:0043231(intracellular membrane-bounded organelle);GO:0043005(neuron projection);GO:0005886(plasma membrane);GO:0005829(cytosol);GO:0005739(mitochondrion);GO:0005737(cytoplasm);GO:0005622(intracellular);GO:2000352(negative regulation of endothelial cell apoptotic process);GO:2000301(negative regulation of synaptic vesicle exocytosis);GO:1900026(positive regulation of subst…	04015(Rap1 signaling pathway);04010(MAPK signaling pathway);04012(ErbB signaling pathway);04068(FoxO signaling pathway);04024(cAMP signaling pathway);04150(mTOR signaling pathway);04810(Regulation of actin cytoskeleton);04510(Focal adhesion);04650(Natural killer cell mediated cytotoxicity);04062(Chemokine signaling pathway);04910(Insulin signaling pathway);04914(Progesterone-mediated oocyte matur…
circRNA5613	5.06526	9.66808	7.52192	6.96286	2.80703	2.24293	7.41842	4.00427	up	0.889571	0.163205	no	chr18	9603361	9617560	+	4	circRNA	-	ENSSSCT00000017958	BRAF	mRNA	chr18:9588258-9603360|chr18:9617560-9622418	B-Raf proto-oncogene, serine/threonine kinase [Source:HGNC Symbol;Acc:HGNC:1097]	GO:0044297(cell body);GO:0043231(intracellular membrane-bounded organelle);GO:0043005(neuron projection);GO:0005886(plasma membrane);GO:0005829(cytosol);GO:0005739(mitochondrion);GO:0005737(cytoplasm);GO:0005622(intracellular);GO:2000352(negative regulation of endothelial cell apoptotic process);GO:2000301(negative regulation of synaptic vesicle exocytosis);GO:1900026(positive regulation of subst…	04015(Rap1 signaling pathway);04010(MAPK signaling pathway);04012(ErbB signaling pathway);04068(FoxO signaling pathway);04024(cAMP signaling pathway);04150(mTOR signaling pathway);04810(Regulation of actin cytoskeleton);04510(Focal adhesion);04650(Natural killer cell mediated cytotoxicity);04062(Chemokine signaling pathway);04910(Insulin signaling pathway);04914(Progesterone-mediated oocyte matur…
circRNA6695	1.13715	2.1019	1.16293	0.386424	2.88736	2.59676	1.46733	1.95685	down	-0.41534	0.610646	no	chr18	9582225	9586667	+	3	circRNA	-	ENSSSCT00000017958	BRAF	mRNA	chr18:9579850-9582224|chr18:9586667-9588081	B-Raf proto-oncogene, serine/threonine kinase [Source:HGNC Symbol;Acc:HGNC:1097]	GO:0044297(cell body);GO:0043231(intracellular membrane-bounded organelle);GO:0043005(neuron projection);GO:0005886(plasma membrane);GO:0005829(cytosol);GO:0005739(mitochondrion);GO:0005737(cytoplasm);GO:0005622(intracellular);GO:2000352(negative regulation of endothelial cell apoptotic process);GO:2000301(negative regulation of synaptic vesicle exocytosis);GO:1900026(positive regulation of subst…	04015(Rap1 signaling pathway);04010(MAPK signaling pathway);04012(ErbB signaling pathway);04068(FoxO signaling pathway);04024(cAMP signaling pathway);04150(mTOR signaling pathway);04810(Regulation of actin cytoskeleton);04510(Focal adhesion);04650(Natural killer cell mediated cytotoxicity);04062(Chemokine signaling pathway);04910(Insulin signaling pathway);04914(Progesterone-mediated oocyte matur…
circRNA6412	7.25854	5.10406	4.30151	18.9116	15.4066	18.2055	5.5547	17.5079	down	-1.65622	0.00116744	yes	chr7	29524893	29525107	+	1	circRNA	-	ENSSSCT00000001637	BRD2	mRNA	chr7:29524809-29524892|chr7:29525107-29525203	bromodomain containing 2 [Source:HGNC Symbol;Acc:HGNC:1103]	GO:0005737(cytoplasm);GO:0005634(nucleus);GO:0006357(regulation of transcription from RNA polymerase II promoter);GO:0006334(nucleosome assembly);GO:0070577(lysine-acetylated histone binding);GO:0003682(chromatin binding)	NA
circRNA6413	5.30627	4.06435	2.8536	4.63971	6.97985	7.68976	4.07474	6.43644	down	-0.659557	0.116557	no	chr7	29525883	29526192	+	1	circRNA	-	ENSSSCT00000032613	BRD2	mRNA	chr7:29525578-29525882|chr7:29526192-29526380	bromodomain containing 2 [Source:HGNC Symbol;Acc:HGNC:1103]	GO:0005737(cytoplasm);GO:0005634(nucleus);GO:0006357(regulation of transcription from RNA polymerase II promoter);GO:0006334(nucleosome assembly);GO:0070577(lysine-acetylated histone binding);GO:0003682(chromatin binding)	NA
circRNA180	12.0915	12.6797	12.1375	61.6165	37.4343	33.2514	12.3029	44.1007	down	-1.8418	0.0692901	no	chr2	61866062	61872040	+	3	circRNA	-	ENSSSCT00000027972	BRD4	mRNA	chr2:61828015-61866061|chr2:61872040-61873619	bromodomain containing 4 [Source:HGNC Symbol;Acc:HGNC:13575]	GO:0005829(cytosol);GO:0005654(nucleoplasm);GO:0005634(nucleus);GO:0000794(condensed nuclear chromosome);GO:1901407(regulation of phosphorylation of RNA polymerase II C-terminal domain);GO:0050727(regulation of inflammatory response);GO:0045944(positive regulation of transcription from RNA polymerase II promoter);GO:0043123(positive regulation of I-kappaB kinase/NF-kappaB signaling);GO:0032968(po…	NA
circRNA6604	9.45067	5.05935	0.500536	7.1158	0.775897	1.58751	5.00352	3.15974	up	0.66314	0.604003	no	chr2	61921289	61921529	+	1	circRNA	-	ENSSSCT00000027972	BRD4	mRNA	chr2:61921205-61921288|chr2:61921529-61921862	bromodomain containing 4 [Source:HGNC Symbol;Acc:HGNC:13575]	GO:0005829(cytosol);GO:0005654(nucleoplasm);GO:0005634(nucleus);GO:0000794(condensed nuclear chromosome);GO:1901407(regulation of phosphorylation of RNA polymerase II C-terminal domain);GO:0050727(regulation of inflammatory response);GO:0045944(positive regulation of transcription from RNA polymerase II promoter);GO:0043123(positive regulation of I-kappaB kinase/NF-kappaB signaling);GO:0032968(po…	NA
circRNA3532	5.04169	2.56737	0.781531	0	0	0	2.79686	0	up	Inf	0.151827	no	chr10	5057906	5062138	+	2	circRNA	-	ENSSSCT00000011825	BRINP3	mRNA	chr10:5015271-5057905|chr10:5062138-5117716	BMP/retinoic acid inducible neural specific 3 [Source:HGNC Symbol;Acc:HGNC:22393]	GO:0043025(neuronal cell body);GO:0030425(dendrite);GO:0005783(endoplasmic reticulum);GO:0071300(cellular response to retinoic acid);GO:0045930(negative regulation of mitotic cell cycle);GO:0045666(positive regulation of neuron differentiation)	NA
circRNA414	21.9183	24.8123	18.9754	0	0	0	21.902	0	up	Inf	0.00586668	yes	chr10	5015081	5062138	+	3	circRNA	-	ENSSSCT00000011825	BRINP3	mRNA	chr10:4993727-5015080|chr10:5062138-5117716	BMP/retinoic acid inducible neural specific 3 [Source:HGNC Symbol;Acc:HGNC:22393]	GO:0043025(neuronal cell body);GO:0030425(dendrite);GO:0005783(endoplasmic reticulum);GO:0071300(cellular response to retinoic acid);GO:0045930(negative regulation of mitotic cell cycle);GO:0045666(positive regulation of neuron differentiation)	NA
circRNA415	73.1568	69.6272	54.7285	0	0	0	65.8375	0	up	Inf	0.00727711	yes	chr10	5015081	5117939	+	4	circRNA	-	ENSSSCT00000011825	BRINP3	mRNA	chr10:4993727-5015080|chr10:5117939-5183148	BMP/retinoic acid inducible neural specific 3 [Source:HGNC Symbol;Acc:HGNC:22393]	GO:0043025(neuronal cell body);GO:0030425(dendrite);GO:0005783(endoplasmic reticulum);GO:0071300(cellular response to retinoic acid);GO:0045930(negative regulation of mitotic cell cycle);GO:0045666(positive regulation of neuron differentiation)	NA
circRNA5157	2.1751	1.45806	1.4425	0	0	0	1.69189	0	up	Inf	0.0197959	yes	chr10	5117717	5117939	+	1	circRNA	-	ENSSSCT00000011825	BRINP3	mRNA	chr10:5062138-5117716|chr10:5117939-5183148	BMP/retinoic acid inducible neural specific 3 [Source:HGNC Symbol;Acc:HGNC:22393]	GO:0043025(neuronal cell body);GO:0030425(dendrite);GO:0005783(endoplasmic reticulum);GO:0071300(cellular response to retinoic acid);GO:0045930(negative regulation of mitotic cell cycle);GO:0045666(positive regulation of neuron differentiation)	NA
circRNA3093	0.968158	6.04379	1.22395	0.165628	2.02614	1.16016	2.7453	1.11731	up	1.29694	0.432279	no	chr7	121217521	121219982	-	2	circRNA	-	ENSSSCT00000002732	BTBD7	mRNA	chr7:121214064-121217520|chr7:121219982-121224371	BTB domain containing 7 [Source:HGNC Symbol;Acc:HGNC:18269]	GO:0005634(nucleus);GO:0060693(regulation of branching involved in salivary gland morphogenesis)	NA
circRNA4407	5.17317	5.79903	5.28971	3.28306	1.3013	1.66653	5.42064	2.08363	up	1.37936	0.0233666	yes	chr7	121213886	121224532	-	4	circRNA	-	ENSSSCT00000002732	BTBD7	mRNA	chr7:121211260-121213885|chr7:121224532-121229265	BTB domain containing 7 [Source:HGNC Symbol;Acc:HGNC:18269]	GO:0005634(nucleus);GO:0060693(regulation of branching involved in salivary gland morphogenesis)	NA
circRNA573	3.1624	7.28792	3.50519	2.24877	2.3769	1.56853	4.65184	2.06473	up	1.17184	0.18579	no	chr7	121213886	121217710	-	2	circRNA	-	ENSSSCT00000002732	BTBD7	mRNA	chr7:121211260-121213885|chr7:121217710-121219838	BTB domain containing 7 [Source:HGNC Symbol;Acc:HGNC:18269]	GO:0005634(nucleus);GO:0060693(regulation of branching involved in salivary gland morphogenesis)	NA
circRNA2570	2.7283	1.98954	2.2495	3.62672	2.98887	2.5211	2.32244	3.04556	down	-0.391065	0.144694	no	chr15	115738358	115739430	-	2	circRNA	-	ENSSSCT00000017522	BZW1	mRNA	chr15:115735194-115738357|chr15:115739430-115740394	basic leucine zipper and W2 domains 1 [Source:HGNC Symbol;Acc:HGNC:18380]	GO:0016020(membrane);GO:0005737(cytoplasm);GO:0045296(cadherin binding);GO:0003723(RNA binding)	NA
circRNA2571	7.1148	5.83635	5.2871	0.861378	6.00812	3.86968	6.07941	3.57973	up	0.764083	0.230372	no	chr15	115740395	115743423	-	5	circRNA	-	ENSSSCT00000017522	BZW1	mRNA	chr15:115739430-115740394|chr15:115743423-115745983	basic leucine zipper and W2 domains 1 [Source:HGNC Symbol;Acc:HGNC:18380]	GO:0016020(membrane);GO:0005737(cytoplasm);GO:0045296(cadherin binding);GO:0003723(RNA binding)	NA
circRNA6327	2.58421	4.00209	3.78341	4.08542	3.39027	2.60812	3.45657	3.36127	up	0.0403342	0.884077	no	chr15	115738358	115740565	-	3	circRNA	-	ENSSSCT00000017522	BZW1	mRNA	chr15:115735194-115738357|chr15:115740565-115740711	basic leucine zipper and W2 domains 1 [Source:HGNC Symbol;Acc:HGNC:18380]	GO:0016020(membrane);GO:0005737(cytoplasm);GO:0045296(cadherin binding);GO:0003723(RNA binding)	NA
circRNA5380	6.84629	6.5972	3.67133	5.4117	4.06502	3.0283	5.70494	4.16834	up	0.452737	0.288596	no	chr14	122857762	122870587	-	5	circRNA	-	ENSSSCT00000011564	C10orf76	mRNA	chr14:122841532-122857761|chr14:122870587-122878860	chromosome 10 open reading frame 76 [Source:HGNC Symbol;Acc:HGNC:25788]	NA	NA
circRNA6375	16.0276	18.967	19.4615	12.4285	10.4359	6.35687	18.152	9.74041	up	0.898077	0.0231562	no	chr14	122832506	122857850	-	4	circRNA	-	ENSSSCT00000011564	C10orf76	mRNA	chr14:122775577-122832505|chr14:122857850-122866205	chromosome 10 open reading frame 76 [Source:HGNC Symbol;Acc:HGNC:25788]	NA	NA
circRNA2520	31.4534	39.3324	50.5102	6.00958	7.62867	5.77988	40.432	6.47271	up	2.64306	0.0244418	yes	chr17	36694691	36717412	+	5	circRNA	-	ENSSSCT00000007828	C20orf194	mRNA	chr17:36688958-36694690|chr17:36717412-36729286	chromosome 20 open reading frame 194 [Source:HGNC Symbol;Acc:HGNC:17721]	NA	NA
circRNA3563	9.03814	9.28994	10.9961	0	0.926778	0.300305	9.77474	0.409028	up	4.57879	0.00122829	yes	chr17	36694691	36699086	+	2	circRNA	-	ENSSSCT00000007828	C20orf194	mRNA	chr17:36688958-36694690|chr17:36699086-36700638	chromosome 20 open reading frame 194 [Source:HGNC Symbol;Acc:HGNC:17721]	NA	NA
circRNA4211	45.0352	53.7543	43.3228	8.47639	4.99792	2.27845	47.3708	5.25092	up	3.17335	0.00119293	yes	chr17	36729287	36735559	+	2	circRNA	-	ENSSSCT00000007828	C20orf194	mRNA	chr17:36717412-36729286|chr17:36735559-36738757	chromosome 20 open reading frame 194 [Source:HGNC Symbol;Acc:HGNC:17721]	NA	NA
circRNA4212	10.086	4.16532	9.24075	4.1232	5.5583	8.59135	7.83071	6.09095	up	0.362475	0.490409	no	chr17	36753586	36756929	+	4	circRNA	-	ENSSSCT00000007828	C20orf194	mRNA	chr17:36749950-36753585|chr17:36756929-36766710	chromosome 20 open reading frame 194 [Source:HGNC Symbol;Acc:HGNC:17721]	NA	NA
circRNA3372	2.62398	4.56537	2.77948	0.398327	1.23101	0.508582	3.32294	0.712641	up	2.22121	0.0373097	yes	chr9	9307763	9320696	-	6	circRNA	-	ENSSSCT00000016187	C2CD3	mRNA	chr9:9303806-9307762|chr9:9320696-9326955	C2 calcium dependent domain containing 3 [Source:HGNC Symbol;Acc:HGNC:24564]	GO:0036064(ciliary basal body);GO:0034451(centriolar satellite);GO:0005814(centriole);GO:0005813(centrosome);GO:1905515(non-motile cilium assembly);GO:0071539(protein localization to centrosome);GO:0061511(centriole elongation);GO:0060271(cilium assembly);GO:0042733(embryonic digit morphogenesis);GO:0030326(embryonic limb morphogenesis);GO:0030162(regulation of proteolysis);GO:0021997(neural plat…	NA
circRNA4884	7.44935	6.87501	10.2025	0	0	1.09813	8.17561	0.366044	up	4.48124	0.00999886	yes	chr9	9213011	9219413	-	3	circRNA	-	ENSSSCT00000016187	C2CD3	mRNA	chr9:9209251-9213010|chr9:9219413-9222549	C2 calcium dependent domain containing 3 [Source:HGNC Symbol;Acc:HGNC:24564]	GO:0036064(ciliary basal body);GO:0034451(centriolar satellite);GO:0005814(centriole);GO:0005813(centrosome);GO:1905515(non-motile cilium assembly);GO:0071539(protein localization to centrosome);GO:0061511(centriole elongation);GO:0060271(cilium assembly);GO:0042733(embryonic digit morphogenesis);GO:0030326(embryonic limb morphogenesis);GO:0030162(regulation of proteolysis);GO:0021997(neural plat…	NA
circRNA6702	1.75742	3.58453	2.7365	0.480205	1.48406	0.613124	2.69281	0.859128	up	1.64817	0.0525567	no	chr9	9307763	9317971	-	5	circRNA	-	ENSSSCT00000016187	C2CD3	mRNA	chr9:9303806-9307762|chr9:9317971-9320548	C2 calcium dependent domain containing 3 [Source:HGNC Symbol;Acc:HGNC:24564]	GO:0036064(ciliary basal body);GO:0034451(centriolar satellite);GO:0005814(centriole);GO:0005813(centrosome);GO:1905515(non-motile cilium assembly);GO:0071539(protein localization to centrosome);GO:0061511(centriole elongation);GO:0060271(cilium assembly);GO:0042733(embryonic digit morphogenesis);GO:0030326(embryonic limb morphogenesis);GO:0030162(regulation of proteolysis);GO:0021997(neural plat…	NA
circRNA1300	2.40409	1.84743	1.36353	0	0.192735	0.297272	1.87168	0.163336	up	3.51843	0.0225286	yes	chr3	75742883	75756405	+	6	circRNA	-	ENSSSCT00000009124	C2orf42	mRNA	chr3:75740208-75742882|chr3:75756405-75762208	chromosome 2 open reading frame 42 [Source:HGNC Symbol;Acc:HGNC:26056]	GO:0031965(nuclear membrane);GO:0005634(nucleus)	NA
circRNA635	1.1274	2.10886	2.33925	0	0.0840032	0	1.8585	0.0280011	up	6.05251	0.0381492	yes	chr3	75746945	75752324	+	3	circRNA	-	ENSSSCT00000009124	C2orf42	mRNA	chr3:75742993-75746944|chr3:75752324-75754166	chromosome 2 open reading frame 42 [Source:HGNC Symbol;Acc:HGNC:26056]	GO:0031965(nuclear membrane);GO:0005634(nucleus)	NA
circRNA4228	3.13279	0.441777	0.728438	1.10238	0	1.01299	1.43433	0.705124	up	1.02443	0.49394	no	chr16	27953034	27954961	+	2	circRNA	-	ENSSSCT00000018367	C5orf51	mRNA	chr16:27950425-27953033|chr16:27954961-27955856	chromosome 5 open reading frame 51 [Source:HGNC Symbol;Acc:HGNC:27750]	GO:0005829(cytosol);GO:0005654(nucleoplasm)	NA
circRNA5238	2.24441	1.2242	1.37262	2.66601	0	0.620511	1.61374	1.09551	up	0.558816	0.597464	no	chr16	27950319	27955971	+	4	circRNA	-	ENSSSCT00000018367	C5orf51	mRNA	chr16:27946101-27950318|chr16:27955971-27962386	chromosome 5 open reading frame 51 [Source:HGNC Symbol;Acc:HGNC:27750]	GO:0005829(cytosol);GO:0005654(nucleoplasm)	NA
circRNA1147	4.96408	5.16872	4.63714	6.09565	2.59534	1.04609	4.92331	3.24569	up	0.601104	0.377995	no	chr7	37462945	37463824	+	2	circRNA	-	ENSSSCT00000001748	C6orf89	mRNA	chr7:37451473-37462944|chr7:37463824-37471723	chromosome 6 open reading frame 89 [Source:HGNC Symbol;Acc:HGNC:21114]	GO:0030496(midbody);GO:0016021(integral component of membrane);GO:0016020(membrane);GO:0005886(plasma membrane);GO:0005737(cytoplasm);GO:0000139(Golgi membrane);GO:1901727(positive regulation of histone deacetylase activity);GO:0050673(epithelial cell proliferation);GO:0045787(positive regulation of cell cycle);GO:0042060(wound healing)	NA
circRNA1866	11.8826	8.85914	5.72507	1.81376	0.924494	1.58139	8.82226	1.43988	up	2.6152	0.0505435	no	chr7	37471724	37478260	+	4	circRNA	-	ENSSSCT00000001748	C6orf89	mRNA	chr7:37463824-37471723|chr7:37478260-37482121	chromosome 6 open reading frame 89 [Source:HGNC Symbol;Acc:HGNC:21114]	GO:0030496(midbody);GO:0016021(integral component of membrane);GO:0016020(membrane);GO:0005886(plasma membrane);GO:0005737(cytoplasm);GO:0000139(Golgi membrane);GO:1901727(positive regulation of histone deacetylase activity);GO:0050673(epithelial cell proliferation);GO:0045787(positive regulation of cell cycle);GO:0042060(wound healing)	NA
circRNA4369	2.66889	1.46959	1.52206	2.90662	0.452763	1.04751	1.88685	1.46896	up	0.36118	0.651214	no	chr7	37471724	37472143	+	2	circRNA	-	ENSSSCT00000001748	C6orf89	mRNA	chr7:37463824-37471723|chr7:37472143-37474243	chromosome 6 open reading frame 89 [Source:HGNC Symbol;Acc:HGNC:21114]	GO:0030496(midbody);GO:0016021(integral component of membrane);GO:0016020(membrane);GO:0005886(plasma membrane);GO:0005737(cytoplasm);GO:0000139(Golgi membrane);GO:1901727(positive regulation of histone deacetylase activity);GO:0050673(epithelial cell proliferation);GO:0045787(positive regulation of cell cycle);GO:0042060(wound healing)	NA
circRNA1670	0.937289	0	0.89355	0	0.712347	0	0.61028	0.237449	up	1.36185	0.392814	no	chr11	18628807	18630310	+	2	circRNA	-	ENSSSCT00000010296	CAB39L	mRNA	None|chr11:18630310-18665769	calcium binding protein 39 like [Source:HGNC Symbol;Acc:HGNC:20290]	GO:0070062(extracellular exosome)	04152(AMPK signaling pathway);04150(mTOR signaling pathway)
circRNA6843	2.65565	7.52657	2.3828	3.17576	1.38512	2.83399	4.18834	2.46496	up	0.764816	0.4145	no	chr11	18694605	18703665	+	3	circRNA	-	ENSSSCT00000010296	CAB39L	mRNA	chr11:18690071-18694604|chr11:18703665-18713751	calcium binding protein 39 like [Source:HGNC Symbol;Acc:HGNC:20290]	GO:0070062(extracellular exosome)	04152(AMPK signaling pathway);04150(mTOR signaling pathway)
circRNA1922	0.353447	1.47588	1.17934	10.8553	6.75287	5.83666	1.00289	7.81495	down	-2.96208	0.042259	yes	chr6	100723128	100726469	+	3	circRNA	-	ENSSSCT00000004104	CABLES1	mRNA	chr6:100705591-100723127|chr6:100726469-100790705	Cdk5 and Abl enzyme substrate 1 [Source:HGNC Symbol;Acc:HGNC:25097]	GO:0005829(cytosol);GO:0051726(regulation of cell cycle)	NA
circRNA5861	5.80431	5.77958	14.0642	21.9185	25.7021	18.6975	8.54936	22.106	down	-1.37055	0.019638	yes	chr6	100705514	100726469	+	4	circRNA	-	ENSSSCT00000004104	CABLES1	mRNA	chr6:100685946-100705513|chr6:100726469-100790705	Cdk5 and Abl enzyme substrate 1 [Source:HGNC Symbol;Acc:HGNC:25097]	GO:0005829(cytosol);GO:0051726(regulation of cell cycle)	NA
circRNA2898	0	0.833237	0.366376	0.504051	2.73824	1.743	0.399871	1.66176	down	-2.05511	0.180904	no	chr9	135203506	135206877	+	3	circRNA	-	ENSSSCT00000016932	CACNA1E	mRNA	chr9:135138107-135203505|chr9:135206877-135321813	calcium voltage-gated channel subunit alpha1 E [Source:HGNC Symbol;Acc:HGNC:1392]	GO:0016021(integral component of membrane);GO:0016020(membrane);GO:0005891(voltage-gated calcium channel complex);GO:0005886(plasma membrane);GO:0086010(membrane depolarization during action potential);GO:0070588(calcium ion transmembrane transport);GO:0055085(transmembrane transport);GO:0034765(regulation of ion transmembrane transport);GO:0006816(calcium ion transport);GO:0006811(ion transport)…	04010(MAPK signaling pathway);04020(Calcium signaling pathway);04930(Type II diabetes mellitus)
circRNA3410	0	0	0	0.660533	3.58832	1.05421	0	1.76769	down	-Inf	0.193828	no	chr9	135205125	135206877	+	2	circRNA	-	ENSSSCT00000016932	CACNA1E	mRNA	chr9:135203609-135205124|chr9:135206877-135321813	calcium voltage-gated channel subunit alpha1 E [Source:HGNC Symbol;Acc:HGNC:1392]	GO:0016021(integral component of membrane);GO:0016020(membrane);GO:0005891(voltage-gated calcium channel complex);GO:0005886(plasma membrane);GO:0086010(membrane depolarization during action potential);GO:0070588(calcium ion transmembrane transport);GO:0055085(transmembrane transport);GO:0034765(regulation of ion transmembrane transport);GO:0006816(calcium ion transport);GO:0006811(ion transport)…	04010(MAPK signaling pathway);04020(Calcium signaling pathway);04930(Type II diabetes mellitus)
circRNA6134	0.434327	0.32552	0.782112	0.506358	4.09559	1.27956	0.513986	1.9605	down	-1.93142	0.315362	no	chr9	135417867	135424815	+	6	circRNA	-	ENSSSCT00000016932	CACNA1E	mRNA	chr9:135416185-135417866|chr9:135424815-135428784	calcium voltage-gated channel subunit alpha1 E [Source:HGNC Symbol;Acc:HGNC:1392]	GO:0016021(integral component of membrane);GO:0016020(membrane);GO:0005891(voltage-gated calcium channel complex);GO:0005886(plasma membrane);GO:0086010(membrane depolarization during action potential);GO:0070588(calcium ion transmembrane transport);GO:0055085(transmembrane transport);GO:0034765(regulation of ion transmembrane transport);GO:0006816(calcium ion transport);GO:0006811(ion transport)…	04010(MAPK signaling pathway);04020(Calcium signaling pathway);04930(Type II diabetes mellitus)
circRNA1514	2.47473	2.79942	2.9747	0	1.70364	0	2.74962	0.567879	up	2.27558	0.0537288	no	chr9	108522658	108524946	+	4	circRNA	-	ENSSSCT00000016777	CACNA2D1	mRNA	chr9:108521489-108522657|chr9:108524946-108527561	calcium voltage-gated channel auxiliary subunit alpha2delta 1 [Source:HGNC Symbol;Acc:HGNC:1399]	GO:1990454(L-type voltage-gated calcium channel complex);GO:0070062(extracellular exosome);GO:0030315(T-tubule);GO:0016529(sarcoplasmic reticulum);GO:0005891(voltage-gated calcium channel complex);GO:0086091(regulation of heart rate by cardiac conduction);GO:0086048(membrane depolarization during bundle of His cell action potential);GO:0086002(cardiac muscle cell action potential involved in cont…	04010(MAPK signaling pathway);04921(Oxytocin signaling pathway);04260(Cardiac muscle contraction);04261(Adrenergic signaling in cardiomyocytes);05410(Hypertrophic cardiomyopathy (HCM));05412(Arrhythmogenic right ventricular cardiomyopathy (ARVC));05414(Dilated cardiomyopathy (DCM))
circRNA2274	0.190851	3.49424	1.27361	0	2.65921	0	1.6529	0.886405	up	0.898961	0.591688	no	chr9	108409166	108415151	+	3	circRNA	-	ENSSSCT00000016777	CACNA2D1	mRNA	chr9:108396790-108409165|chr9:108415151-108443277	calcium voltage-gated channel auxiliary subunit alpha2delta 1 [Source:HGNC Symbol;Acc:HGNC:1399]	GO:1990454(L-type voltage-gated calcium channel complex);GO:0070062(extracellular exosome);GO:0030315(T-tubule);GO:0016529(sarcoplasmic reticulum);GO:0005891(voltage-gated calcium channel complex);GO:0086091(regulation of heart rate by cardiac conduction);GO:0086048(membrane depolarization during bundle of His cell action potential);GO:0086002(cardiac muscle cell action potential involved in cont…	04010(MAPK signaling pathway);04921(Oxytocin signaling pathway);04260(Cardiac muscle contraction);04261(Adrenergic signaling in cardiomyocytes);05410(Hypertrophic cardiomyopathy (HCM));05412(Arrhythmogenic right ventricular cardiomyopathy (ARVC));05414(Dilated cardiomyopathy (DCM))
circRNA3402	4.87484	10.6204	10.103	7.50568	0	0	8.53273	2.50189	up	1.76999	0.13023	no	chr9	108154906	108171796	+	2	circRNA	-	ENSSSCT00000016777	CACNA2D1	mRNA	chr9:108068631-108154905|chr9:108171796-108308169	calcium voltage-gated channel auxiliary subunit alpha2delta 1 [Source:HGNC Symbol;Acc:HGNC:1399]	GO:1990454(L-type voltage-gated calcium channel complex);GO:0070062(extracellular exosome);GO:0030315(T-tubule);GO:0016529(sarcoplasmic reticulum);GO:0005891(voltage-gated calcium channel complex);GO:0086091(regulation of heart rate by cardiac conduction);GO:0086048(membrane depolarization during bundle of His cell action potential);GO:0086002(cardiac muscle cell action potential involved in cont…	04010(MAPK signaling pathway);04921(Oxytocin signaling pathway);04260(Cardiac muscle contraction);04261(Adrenergic signaling in cardiomyocytes);05410(Hypertrophic cardiomyopathy (HCM));05412(Arrhythmogenic right ventricular cardiomyopathy (ARVC));05414(Dilated cardiomyopathy (DCM))
circRNA4931	9.45369	6.13156	8.37703	0	1.61199	0	7.98743	0.537331	up	3.89385	0.00615216	yes	chr9	108308170	108359475	+	3	circRNA	-	ENSSSCT00000016777	CACNA2D1	mRNA	chr9:108171796-108308169|chr9:108359475-108396658	calcium voltage-gated channel auxiliary subunit alpha2delta 1 [Source:HGNC Symbol;Acc:HGNC:1399]	GO:1990454(L-type voltage-gated calcium channel complex);GO:0070062(extracellular exosome);GO:0030315(T-tubule);GO:0016529(sarcoplasmic reticulum);GO:0005891(voltage-gated calcium channel complex);GO:0086091(regulation of heart rate by cardiac conduction);GO:0086048(membrane depolarization during bundle of His cell action potential);GO:0086002(cardiac muscle cell action potential involved in cont…	04010(MAPK signaling pathway);04921(Oxytocin signaling pathway);04260(Cardiac muscle contraction);04261(Adrenergic signaling in cardiomyocytes);05410(Hypertrophic cardiomyopathy (HCM));05412(Arrhythmogenic right ventricular cardiomyopathy (ARVC));05414(Dilated cardiomyopathy (DCM))
circRNA1477	0.573071	0.202481	0.43342	0	0	0	0.402991	0	up	Inf	0.064969	no	chr18	26163899	26210863	+	4	circRNA	-	ENSSSCT00000018085	CADPS2	mRNA	chr18:26147521-26163898|chr18:26210863-26232182	calcium dependent secretion activator 2 [Source:HGNC Symbol;Acc:HGNC:16018]	GO:0045211(postsynaptic membrane);GO:0043231(intracellular membrane-bounded organelle);GO:0042734(presynaptic membrane);GO:0031410(cytoplasmic vesicle);GO:0005654(nucleoplasm);GO:1990504(dense core granule exocytosis);GO:0045921(positive regulation of exocytosis);GO:0016082(synaptic vesicle priming);GO:0016079(synaptic vesicle exocytosis);GO:0009267(cellular response to starvation)	NA
circRNA1478	0.0869202	0	0.269308	0	0	0.0151623	0.118743	0.00505408	up	4.55425	0.288097	no	chr18	26303145	26317097	+	5	circRNA	-	ENSSSCT00000018085	CADPS2	mRNA	chr18:26272920-26303144|chr18:26317097-26334426	calcium dependent secretion activator 2 [Source:HGNC Symbol;Acc:HGNC:16018]	GO:0045211(postsynaptic membrane);GO:0043231(intracellular membrane-bounded organelle);GO:0042734(presynaptic membrane);GO:0031410(cytoplasmic vesicle);GO:0005654(nucleoplasm);GO:1990504(dense core granule exocytosis);GO:0045921(positive regulation of exocytosis);GO:0016082(synaptic vesicle priming);GO:0016079(synaptic vesicle exocytosis);GO:0009267(cellular response to starvation)	NA
circRNA1479	0.0470212	0	0.0896539	0	0	0	0.0455583	0	up	Inf	0.220543	no	chr18	26379483	26396208	+	2	circRNA	-	ENSSSCT00000018085	CADPS2	mRNA	chr18:26369767-26379482|chr18:26396208-26396333	calcium dependent secretion activator 2 [Source:HGNC Symbol;Acc:HGNC:16018]	GO:0045211(postsynaptic membrane);GO:0043231(intracellular membrane-bounded organelle);GO:0042734(presynaptic membrane);GO:0031410(cytoplasmic vesicle);GO:0005654(nucleoplasm);GO:1990504(dense core granule exocytosis);GO:0045921(positive regulation of exocytosis);GO:0016082(synaptic vesicle priming);GO:0016079(synaptic vesicle exocytosis);GO:0009267(cellular response to starvation)	NA
circRNA2223	0	0	0.0905625	0	0	0	0.0301875	0	up	Inf	0.42265	no	chr18	26147189	26147521	+	1	circRNA	-	ENSSSCT00000018085	CADPS2	mRNA	chr18:26093946-26147188|chr18:26147521-26163898	calcium dependent secretion activator 2 [Source:HGNC Symbol;Acc:HGNC:16018]	GO:0045211(postsynaptic membrane);GO:0043231(intracellular membrane-bounded organelle);GO:0042734(presynaptic membrane);GO:0031410(cytoplasmic vesicle);GO:0005654(nucleoplasm);GO:1990504(dense core granule exocytosis);GO:0045921(positive regulation of exocytosis);GO:0016082(synaptic vesicle priming);GO:0016079(synaptic vesicle exocytosis);GO:0009267(cellular response to starvation)	NA
circRNA2224	0.905461	0.190368	0.415909	0	0	0.0114871	0.503912	0.00382903	up	7.04005	0.141285	no	chr18	26232183	26317097	+	7	circRNA	-	ENSSSCT00000018085	CADPS2	mRNA	chr18:26210863-26232182|chr18:26317097-26334426	calcium dependent secretion activator 2 [Source:HGNC Symbol;Acc:HGNC:16018]	GO:0045211(postsynaptic membrane);GO:0043231(intracellular membrane-bounded organelle);GO:0042734(presynaptic membrane);GO:0031410(cytoplasmic vesicle);GO:0005654(nucleoplasm);GO:1990504(dense core granule exocytosis);GO:0045921(positive regulation of exocytosis);GO:0016082(synaptic vesicle priming);GO:0016079(synaptic vesicle exocytosis);GO:0009267(cellular response to starvation)	NA
circRNA2225	0.160025	0.112348	0.0163454	0	0	0	0.0962394	0	up	Inf	0.15043	no	chr18	26314382	26345863	+	5	circRNA	-	ENSSSCT00000018085	CADPS2	mRNA	chr18:26314048-26314381|chr18:26345863-26365041	calcium dependent secretion activator 2 [Source:HGNC Symbol;Acc:HGNC:16018]	GO:0045211(postsynaptic membrane);GO:0043231(intracellular membrane-bounded organelle);GO:0042734(presynaptic membrane);GO:0031410(cytoplasmic vesicle);GO:0005654(nucleoplasm);GO:1990504(dense core granule exocytosis);GO:0045921(positive regulation of exocytosis);GO:0016082(synaptic vesicle priming);GO:0016079(synaptic vesicle exocytosis);GO:0009267(cellular response to starvation)	NA
circRNA2872	0.287577	0.184743	0.0182772	0	0	0	0.163533	0	up	Inf	0.172503	no	chr18	26163899	26175513	+	3	circRNA	-	ENSSSCT00000018085	CADPS2	mRNA	chr18:26147521-26163898|chr18:26175513-26210751	calcium dependent secretion activator 2 [Source:HGNC Symbol;Acc:HGNC:16018]	GO:0045211(postsynaptic membrane);GO:0043231(intracellular membrane-bounded organelle);GO:0042734(presynaptic membrane);GO:0031410(cytoplasmic vesicle);GO:0005654(nucleoplasm);GO:1990504(dense core granule exocytosis);GO:0045921(positive regulation of exocytosis);GO:0016082(synaptic vesicle priming);GO:0016079(synaptic vesicle exocytosis);GO:0009267(cellular response to starvation)	NA
circRNA3358	0.163692	0.105158	0.44822	0	0	0	0.239023	0	up	Inf	0.152724	no	chr18	26147189	26175513	+	4	circRNA	-	ENSSSCT00000018085	CADPS2	mRNA	chr18:26093946-26147188|chr18:26175513-26210751	calcium dependent secretion activator 2 [Source:HGNC Symbol;Acc:HGNC:16018]	GO:0045211(postsynaptic membrane);GO:0043231(intracellular membrane-bounded organelle);GO:0042734(presynaptic membrane);GO:0031410(cytoplasmic vesicle);GO:0005654(nucleoplasm);GO:1990504(dense core granule exocytosis);GO:0045921(positive regulation of exocytosis);GO:0016082(synaptic vesicle priming);GO:0016079(synaptic vesicle exocytosis);GO:0009267(cellular response to starvation)	NA
circRNA3359	0.0153654	0	0.0292967	0	0	0	0.0148874	0	up	Inf	0.220543	no	chr18	26379483	26423397	+	8	circRNA	-	ENSSSCT00000018085	CADPS2	mRNA	chr18:26369767-26379482|chr18:26423397-26436574	calcium dependent secretion activator 2 [Source:HGNC Symbol;Acc:HGNC:16018]	GO:0045211(postsynaptic membrane);GO:0043231(intracellular membrane-bounded organelle);GO:0042734(presynaptic membrane);GO:0031410(cytoplasmic vesicle);GO:0005654(nucleoplasm);GO:1990504(dense core granule exocytosis);GO:0045921(positive regulation of exocytosis);GO:0016082(synaptic vesicle priming);GO:0016079(synaptic vesicle exocytosis);GO:0009267(cellular response to starvation)	NA
circRNA3992	0.878708	0	0.74251	0	0	0.668862	0.540406	0.222954	up	1.2773	0.420642	no	chr18	26093833	26163979	+	3	circRNA	-	ENSSSCT00000018085	CADPS2	mRNA	chr18:25970247-26093832|chr18:26163979-26170008	calcium dependent secretion activator 2 [Source:HGNC Symbol;Acc:HGNC:16018]	GO:0045211(postsynaptic membrane);GO:0043231(intracellular membrane-bounded organelle);GO:0042734(presynaptic membrane);GO:0031410(cytoplasmic vesicle);GO:0005654(nucleoplasm);GO:1990504(dense core granule exocytosis);GO:0045921(positive regulation of exocytosis);GO:0016082(synaptic vesicle priming);GO:0016079(synaptic vesicle exocytosis);GO:0009267(cellular response to starvation)	NA
circRNA3993	0.811116	0.477648	0.98806	0	0	0	0.758941	0	up	Inf	0.036744	yes	chr18	26175392	26210863	+	2	circRNA	-	ENSSSCT00000018085	CADPS2	mRNA	chr18:26170245-26175391|chr18:26210863-26232182	calcium dependent secretion activator 2 [Source:HGNC Symbol;Acc:HGNC:16018]	GO:0045211(postsynaptic membrane);GO:0043231(intracellular membrane-bounded organelle);GO:0042734(presynaptic membrane);GO:0031410(cytoplasmic vesicle);GO:0005654(nucleoplasm);GO:1990504(dense core granule exocytosis);GO:0045921(positive regulation of exocytosis);GO:0016082(synaptic vesicle priming);GO:0016079(synaptic vesicle exocytosis);GO:0009267(cellular response to starvation)	NA
circRNA3994	0.761957	0.202507	0.319264	0	0	0.00857516	0.427909	0.00285839	up	7.22596	0.130031	no	chr18	26232183	26345863	+	10	circRNA	-	ENSSSCT00000018085	CADPS2	mRNA	chr18:26210863-26232182|chr18:26345863-26365041	calcium dependent secretion activator 2 [Source:HGNC Symbol;Acc:HGNC:16018]	GO:0045211(postsynaptic membrane);GO:0043231(intracellular membrane-bounded organelle);GO:0042734(presynaptic membrane);GO:0031410(cytoplasmic vesicle);GO:0005654(nucleoplasm);GO:1990504(dense core granule exocytosis);GO:0045921(positive regulation of exocytosis);GO:0016082(synaptic vesicle priming);GO:0016079(synaptic vesicle exocytosis);GO:0009267(cellular response to starvation)	NA
circRNA3995	0.131035	4.68826	0.0551121	0	5.12097	0.0161348	1.6248	1.71237	down	-0.0757292	0.971369	no	chr18	26314382	26379639	+	9	circRNA	-	ENSSSCT00000018085	CADPS2	mRNA	chr18:26314048-26314381|chr18:26379639-26396066	calcium dependent secretion activator 2 [Source:HGNC Symbol;Acc:HGNC:16018]	GO:0045211(postsynaptic membrane);GO:0043231(intracellular membrane-bounded organelle);GO:0042734(presynaptic membrane);GO:0031410(cytoplasmic vesicle);GO:0005654(nucleoplasm);GO:1990504(dense core granule exocytosis);GO:0045921(positive regulation of exocytosis);GO:0016082(synaptic vesicle priming);GO:0016079(synaptic vesicle exocytosis);GO:0009267(cellular response to starvation)	NA
circRNA3996	0	0.238255	0.0346636	0	0	0	0.0909728	0	up	Inf	0.345542	no	chr18	26334427	26345863	+	3	circRNA	-	ENSSSCT00000018085	CADPS2	mRNA	chr18:26317097-26334426|chr18:26345863-26365041	calcium dependent secretion activator 2 [Source:HGNC Symbol;Acc:HGNC:16018]	GO:0045211(postsynaptic membrane);GO:0043231(intracellular membrane-bounded organelle);GO:0042734(presynaptic membrane);GO:0031410(cytoplasmic vesicle);GO:0005654(nucleoplasm);GO:1990504(dense core granule exocytosis);GO:0045921(positive regulation of exocytosis);GO:0016082(synaptic vesicle priming);GO:0016079(synaptic vesicle exocytosis);GO:0009267(cellular response to starvation)	NA
circRNA4859	0.357441	0.126293	0.652746	0	0	0	0.378827	0	up	Inf	0.130753	no	chr18	26147189	26210863	+	5	circRNA	-	ENSSSCT00000018085	CADPS2	mRNA	chr18:26093946-26147188|chr18:26210863-26232182	calcium dependent secretion activator 2 [Source:HGNC Symbol;Acc:HGNC:16018]	GO:0045211(postsynaptic membrane);GO:0043231(intracellular membrane-bounded organelle);GO:0042734(presynaptic membrane);GO:0031410(cytoplasmic vesicle);GO:0005654(nucleoplasm);GO:1990504(dense core granule exocytosis);GO:0045921(positive regulation of exocytosis);GO:0016082(synaptic vesicle priming);GO:0016079(synaptic vesicle exocytosis);GO:0009267(cellular response to starvation)	NA
circRNA4860	0.457132	0.161517	0.345734	0	0	0	0.321461	0	up	Inf	0.064969	no	chr18	26163899	26232322	+	5	circRNA	-	ENSSSCT00000018085	CADPS2	mRNA	chr18:26147521-26163898|chr18:26232322-26272853	calcium dependent secretion activator 2 [Source:HGNC Symbol;Acc:HGNC:16018]	GO:0045211(postsynaptic membrane);GO:0043231(intracellular membrane-bounded organelle);GO:0042734(presynaptic membrane);GO:0031410(cytoplasmic vesicle);GO:0005654(nucleoplasm);GO:1990504(dense core granule exocytosis);GO:0045921(positive regulation of exocytosis);GO:0016082(synaptic vesicle priming);GO:0016079(synaptic vesicle exocytosis);GO:0009267(cellular response to starvation)	NA
circRNA4862	0.0781074	15.58	0.148925	0	17.2975	0.0544999	5.26901	5.784	down	-0.134536	0.950102	no	chr18	26368044	26379639	+	3	circRNA	-	ENSSSCT00000018085	CADPS2	mRNA	chr18:26365068-26368043|chr18:26379639-26396066	calcium dependent secretion activator 2 [Source:HGNC Symbol;Acc:HGNC:16018]	GO:0045211(postsynaptic membrane);GO:0043231(intracellular membrane-bounded organelle);GO:0042734(presynaptic membrane);GO:0031410(cytoplasmic vesicle);GO:0005654(nucleoplasm);GO:1990504(dense core granule exocytosis);GO:0045921(positive regulation of exocytosis);GO:0016082(synaptic vesicle priming);GO:0016079(synaptic vesicle exocytosis);GO:0009267(cellular response to starvation)	NA
circRNA4863	0.0137432	0	0.576484	0	0	0	0.196742	0	up	Inf	0.409054	no	chr18	26379483	26436682	+	9	circRNA	-	ENSSSCT00000018085	CADPS2	mRNA	chr18:26369767-26379482|chr18:26436682-26457790	calcium dependent secretion activator 2 [Source:HGNC Symbol;Acc:HGNC:16018]	GO:0045211(postsynaptic membrane);GO:0043231(intracellular membrane-bounded organelle);GO:0042734(presynaptic membrane);GO:0031410(cytoplasmic vesicle);GO:0005654(nucleoplasm);GO:1990504(dense core granule exocytosis);GO:0045921(positive regulation of exocytosis);GO:0016082(synaptic vesicle priming);GO:0016079(synaptic vesicle exocytosis);GO:0009267(cellular response to starvation)	NA
circRNA5559	8.51229	2.14302	8.11506	4.22441	3.3027	0.53509	6.25679	2.6874	up	1.21921	0.222501	no	chr2	80461235	80462260	-	3	circRNA	-	ENSSSCT00000015315	CANX	mRNA	chr2:80460531-80461234|chr2:80462260-80463140	calnexin [Source:HGNC Symbol;Acc:HGNC:1473]	GO:0070062(extracellular exosome);GO:0045202(synapse);GO:0044233(ER-mitochondrion membrane contact site);GO:0043209(myelin sheath);GO:0031012(extracellular matrix);GO:0016021(integral component of membrane);GO:0016020(membrane);GO:0005789(endoplasmic reticulum membrane);GO:0005783(endoplasmic reticulum);GO:0072583(clathrin-dependent endocytosis);GO:0048488(synaptic vesicle endocytosis);GO:0006457…	04141(Protein processing in endoplasmic reticulum);04145(Phagosome);04612(Antigen processing and presentation);04918(Thyroid hormone synthesis);05166(HTLV-I infection)
circRNA6607	7.13853	4.27116	9.4742	4.10002	3.66418	1.69287	6.9613	3.15235	up	1.14293	0.110361	no	chr2	80461235	80463317	-	4	circRNA	-	ENSSSCT00000015315	CANX	mRNA	chr2:80460531-80461234|chr2:80463317-80482326	calnexin [Source:HGNC Symbol;Acc:HGNC:1473]	GO:0070062(extracellular exosome);GO:0045202(synapse);GO:0044233(ER-mitochondrion membrane contact site);GO:0043209(myelin sheath);GO:0031012(extracellular matrix);GO:0016021(integral component of membrane);GO:0016020(membrane);GO:0005789(endoplasmic reticulum membrane);GO:0005783(endoplasmic reticulum);GO:0072583(clathrin-dependent endocytosis);GO:0048488(synaptic vesicle endocytosis);GO:0006457…	04141(Protein processing in endoplasmic reticulum);04145(Phagosome);04612(Antigen processing and presentation);04918(Thyroid hormone synthesis);05166(HTLV-I infection)
circRNA2341	2.1982	1.72106	2.61953	0	0	0.575178	2.1796	0.191726	up	3.50694	0.00460643	yes	chr13	2398096	2401277	+	3	circRNA	-	ENSSSCT00000022738	CAPN7	mRNA	chr13:2393883-2398095|chr13:2401277-2403774	calpain 7 [Source:HGNC Symbol;Acc:HGNC:1484]	GO:0070062(extracellular exosome);GO:0016604(nuclear body);GO:0005829(cytosol);GO:0005654(nucleoplasm);GO:0005622(intracellular);GO:0097264(self proteolysis);GO:0010634(positive regulation of epithelial cell migration);GO:0006508(proteolysis);GO:0090541(MIT domain binding);GO:0016787(hydrolase activity);GO:0008234(cysteine-type peptidase activity);GO:0008233(peptidase activity);GO:0004198(calcium…	NA
circRNA2342	0.33211	4.32037	3.00782	0	0	0	2.55343	0	up	Inf	0.161537	no	chr13	2403775	2405429	+	2	circRNA	-	ENSSSCT00000022738	CAPN7	mRNA	chr13:2401277-2403774|chr13:2405429-2406513	calpain 7 [Source:HGNC Symbol;Acc:HGNC:1484]	GO:0070062(extracellular exosome);GO:0016604(nuclear body);GO:0005829(cytosol);GO:0005654(nucleoplasm);GO:0005622(intracellular);GO:0097264(self proteolysis);GO:0010634(positive regulation of epithelial cell migration);GO:0006508(proteolysis);GO:0090541(MIT domain binding);GO:0016787(hydrolase activity);GO:0008234(cysteine-type peptidase activity);GO:0008233(peptidase activity);GO:0004198(calcium…	NA
circRNA4080	3.72358	3.39239	4.77612	2.79706	3.30161	0.897542	3.96403	2.33207	up	0.765357	0.143026	no	chr13	2382115	2393883	+	5	circRNA	-	ENSSSCT00000022738	CAPN7	mRNA	chr13:2379376-2382114|chr13:2393883-2398095	calpain 7 [Source:HGNC Symbol;Acc:HGNC:1484]	GO:0070062(extracellular exosome);GO:0016604(nuclear body);GO:0005829(cytosol);GO:0005654(nucleoplasm);GO:0005622(intracellular);GO:0097264(self proteolysis);GO:0010634(positive regulation of epithelial cell migration);GO:0006508(proteolysis);GO:0090541(MIT domain binding);GO:0016787(hydrolase activity);GO:0008234(cysteine-type peptidase activity);GO:0008233(peptidase activity);GO:0004198(calcium…	NA
circRNA5546	13.3005	9.23715	7.31086	11.0011	2.50435	4.01317	9.94949	5.83953	up	0.768771	0.271865	no	chr2	29213178	29215000	-	3	circRNA	-	ENSSSCT00000014531	CAPRIN1	mRNA	chr2:29209854-29213177|chr2:29215000-29215077	cell cycle associated protein 1 [Source:HGNC Symbol;Acc:HGNC:6743]	GO:0016020(membrane);GO:0010494(cytoplasmic stress granule);GO:0005829(cytosol);GO:0061003(positive regulation of dendritic spine morphogenesis);GO:0050775(positive regulation of dendrite morphogenesis);GO:0003723(RNA binding)	NA
circRNA951	1.40593	0.812869	1.87646	5.53196	0	0	1.36509	1.84399	down	-0.433837	0.820638	no	chr2	29224763	29225004	-	2	circRNA	-	ENSSSCT00000014531	CAPRIN1	mRNA	chr2:29219660-29224762|chr2:29225004-29241833	cell cycle associated protein 1 [Source:HGNC Symbol;Acc:HGNC:6743]	GO:0016020(membrane);GO:0010494(cytoplasmic stress granule);GO:0005829(cytosol);GO:0061003(positive regulation of dendritic spine morphogenesis);GO:0050775(positive regulation of dendrite morphogenesis);GO:0003723(RNA binding)	NA
circRNA1141	1.65642	0.973263	1.29411	0.556376	3.42868	1.56734	1.30793	1.8508	down	-0.500865	0.588361	no	chr7	21571926	21573043	+	2	circRNA	-	ENSSSCT00000001196	CARMIL1	mRNA	chr7:21561703-21571925|chr7:21573043-21583139	capping protein regulator and myosin 1 linker 1 [Source:HGNC Symbol;Acc:HGNC:21581]	GO:0070062(extracellular exosome);GO:0044354(macropinosome);GO:0031941(filamentous actin);GO:0031252(cell leading edge);GO:0030027(lamellipodium);GO:0016607(nuclear speck);GO:0005886(plasma membrane);GO:0005829(cytosol);GO:0005634(nucleus);GO:2000813(negative regulation of barbed-end actin filament capping);GO:1902745(positive regulation of lamellipodium organization);GO:1900026(positive regulati…	NA
circRNA1861	4.98043	10.1234	11.1578	1.68408	3.94288	4.07241	8.75388	3.23312	up	1.43699	0.0861599	no	chr7	21510539	21521517	+	3	circRNA	-	ENSSSCT00000001196	CARMIL1	mRNA	chr7:21503997-21510538|chr7:21521517-21527556	capping protein regulator and myosin 1 linker 1 [Source:HGNC Symbol;Acc:HGNC:21581]	GO:0070062(extracellular exosome);GO:0044354(macropinosome);GO:0031941(filamentous actin);GO:0031252(cell leading edge);GO:0030027(lamellipodium);GO:0016607(nuclear speck);GO:0005886(plasma membrane);GO:0005829(cytosol);GO:0005634(nucleus);GO:2000813(negative regulation of barbed-end actin filament capping);GO:1902745(positive regulation of lamellipodium organization);GO:1900026(positive regulati…	NA
circRNA3078	4.03196	4.60771	4.72002	1.44062	1.95742	0.983112	4.45323	1.46038	up	1.60851	0.00144235	yes	chr7	21551602	21573043	+	6	circRNA	-	ENSSSCT00000001196	CARMIL1	mRNA	chr7:21546517-21551601|chr7:21573043-21583139	capping protein regulator and myosin 1 linker 1 [Source:HGNC Symbol;Acc:HGNC:21581]	GO:0070062(extracellular exosome);GO:0044354(macropinosome);GO:0031941(filamentous actin);GO:0031252(cell leading edge);GO:0030027(lamellipodium);GO:0016607(nuclear speck);GO:0005886(plasma membrane);GO:0005829(cytosol);GO:0005634(nucleus);GO:2000813(negative regulation of barbed-end actin filament capping);GO:1902745(positive regulation of lamellipodium organization);GO:1900026(positive regulati…	NA
circRNA3689	2.25757	2.49044	2.97645	1.97116	0.644797	0.862602	2.57482	1.15952	up	1.15095	0.0550167	no	chr7	21551602	21561703	+	4	circRNA	-	ENSSSCT00000001196	CARMIL1	mRNA	chr7:21546517-21551601|chr7:21561703-21571925	capping protein regulator and myosin 1 linker 1 [Source:HGNC Symbol;Acc:HGNC:21581]	GO:0070062(extracellular exosome);GO:0044354(macropinosome);GO:0031941(filamentous actin);GO:0031252(cell leading edge);GO:0030027(lamellipodium);GO:0016607(nuclear speck);GO:0005886(plasma membrane);GO:0005829(cytosol);GO:0005634(nucleus);GO:2000813(negative regulation of barbed-end actin filament capping);GO:1902745(positive regulation of lamellipodium organization);GO:1900026(positive regulati…	NA
circRNA4	1.87628	2.60041	2.63047	2.54439	2.54871	1.65277	2.36905	2.24862	up	0.0752679	0.771554	no	chr7	21583140	21589708	+	3	circRNA	-	ENSSSCT00000001196	CARMIL1	mRNA	chr7:21573043-21583139|chr7:21589708-21617998	capping protein regulator and myosin 1 linker 1 [Source:HGNC Symbol;Acc:HGNC:21581]	GO:0070062(extracellular exosome);GO:0044354(macropinosome);GO:0031941(filamentous actin);GO:0031252(cell leading edge);GO:0030027(lamellipodium);GO:0016607(nuclear speck);GO:0005886(plasma membrane);GO:0005829(cytosol);GO:0005634(nucleus);GO:2000813(negative regulation of barbed-end actin filament capping);GO:1902745(positive regulation of lamellipodium organization);GO:1900026(positive regulati…	NA
circRNA4356	1.87724	1.88592	1.33271	3.32651	3.99683	1.14264	1.69862	2.822	down	-0.73235	0.321217	no	chr7	21583140	21586506	+	2	circRNA	-	ENSSSCT00000001196	CARMIL1	mRNA	chr7:21573043-21583139|chr7:21586506-21589558	capping protein regulator and myosin 1 linker 1 [Source:HGNC Symbol;Acc:HGNC:21581]	GO:0070062(extracellular exosome);GO:0044354(macropinosome);GO:0031941(filamentous actin);GO:0031252(cell leading edge);GO:0030027(lamellipodium);GO:0016607(nuclear speck);GO:0005886(plasma membrane);GO:0005829(cytosol);GO:0005634(nucleus);GO:2000813(negative regulation of barbed-end actin filament capping);GO:1902745(positive regulation of lamellipodium organization);GO:1900026(positive regulati…	NA
circRNA555	2.25326	1.85332	2.01049	2.55195	0.834782	0.818958	2.03902	1.4019	up	0.540499	0.383568	no	chr7	21551602	21556652	+	3	circRNA	-	ENSSSCT00000001196	CARMIL1	mRNA	chr7:21546517-21551601|chr7:21556652-21561604	capping protein regulator and myosin 1 linker 1 [Source:HGNC Symbol;Acc:HGNC:21581]	GO:0070062(extracellular exosome);GO:0044354(macropinosome);GO:0031941(filamentous actin);GO:0031252(cell leading edge);GO:0030027(lamellipodium);GO:0016607(nuclear speck);GO:0005886(plasma membrane);GO:0005829(cytosol);GO:0005634(nucleus);GO:2000813(negative regulation of barbed-end actin filament capping);GO:1902745(positive regulation of lamellipodium organization);GO:1900026(positive regulati…	NA
circRNA556	3.60793	4.93659	5.38968	1.85229	2.87586	1.56429	4.64473	2.09748	up	1.14694	0.0216852	yes	chr7	21551602	21589708	+	9	circRNA	-	ENSSSCT00000001196	CARMIL1	mRNA	chr7:21546517-21551601|chr7:21589708-21617998	capping protein regulator and myosin 1 linker 1 [Source:HGNC Symbol;Acc:HGNC:21581]	GO:0070062(extracellular exosome);GO:0044354(macropinosome);GO:0031941(filamentous actin);GO:0031252(cell leading edge);GO:0030027(lamellipodium);GO:0016607(nuclear speck);GO:0005886(plasma membrane);GO:0005829(cytosol);GO:0005634(nucleus);GO:2000813(negative regulation of barbed-end actin filament capping);GO:1902745(positive regulation of lamellipodium organization);GO:1900026(positive regulati…	NA
circRNA5800	1.42917	1.43956	0.797549	0	0.883075	0.681023	1.22209	0.521366	up	1.22898	0.112798	no	chr7	21551602	21553443	+	2	circRNA	-	ENSSSCT00000001196	CARMIL1	mRNA	chr7:21546517-21551601|chr7:21553443-21556558	capping protein regulator and myosin 1 linker 1 [Source:HGNC Symbol;Acc:HGNC:21581]	GO:0070062(extracellular exosome);GO:0044354(macropinosome);GO:0031941(filamentous actin);GO:0031252(cell leading edge);GO:0030027(lamellipodium);GO:0016607(nuclear speck);GO:0005886(plasma membrane);GO:0005829(cytosol);GO:0005634(nucleus);GO:2000813(negative regulation of barbed-end actin filament capping);GO:1902745(positive regulation of lamellipodium organization);GO:1900026(positive regulati…	NA
circRNA6411	25.5213	26.8316	27.7856	10.5248	7.60642	5.72387	26.7128	7.9517	up	1.7482	0.00154702	yes	chr7	21490691	21521517	+	7	circRNA	-	ENSSSCT00000001196	CARMIL1	mRNA	chr7:21483087-21490690|chr7:21521517-21527556	capping protein regulator and myosin 1 linker 1 [Source:HGNC Symbol;Acc:HGNC:21581]	GO:0070062(extracellular exosome);GO:0044354(macropinosome);GO:0031941(filamentous actin);GO:0031252(cell leading edge);GO:0030027(lamellipodium);GO:0016607(nuclear speck);GO:0005886(plasma membrane);GO:0005829(cytosol);GO:0005634(nucleus);GO:2000813(negative regulation of barbed-end actin filament capping);GO:1902745(positive regulation of lamellipodium organization);GO:1900026(positive regulati…	NA
circRNA871	2.41612	3.77762	4.49654	1.77569	4.03663	2.16474	3.56343	2.65902	up	0.422371	0.385382	no	chr7	21571926	21589708	+	5	circRNA	-	ENSSSCT00000001196	CARMIL1	mRNA	chr7:21561703-21571925|chr7:21589708-21617998	capping protein regulator and myosin 1 linker 1 [Source:HGNC Symbol;Acc:HGNC:21581]	GO:0070062(extracellular exosome);GO:0044354(macropinosome);GO:0031941(filamentous actin);GO:0031252(cell leading edge);GO:0030027(lamellipodium);GO:0016607(nuclear speck);GO:0005886(plasma membrane);GO:0005829(cytosol);GO:0005634(nucleus);GO:2000813(negative regulation of barbed-end actin filament capping);GO:1902745(positive regulation of lamellipodium organization);GO:1900026(positive regulati…	NA
circRNA2261	1.06973	1.0799	1.1655	0.668111	0.419407	0.319891	1.10504	0.469136	up	1.23602	0.0188492	yes	chr9	81539754	81544896	+	4	circRNA	-	ENSSSCT00000016700	CASD1	mRNA	chr9:81537030-81539753|chr9:81544896-81548329	CAS1 domain containing 1 [Source:HGNC Symbol;Acc:HGNC:16014]	GO:0016021(integral component of membrane);GO:0016020(membrane)	NA
circRNA4919	0	0.745752	0	0	0	2.025	0.248584	0.674998	down	-1.44115	0.602009	no	chr9	81468461	81469217	+	2	circRNA	-	ENSSSCT00000016700	CASD1	mRNA	chr9:81460013-81468460|chr9:81469217-81500873	CAS1 domain containing 1 [Source:HGNC Symbol;Acc:HGNC:16014]	GO:0016021(integral component of membrane);GO:0016020(membrane)	NA
circRNA4920	0.878708	0.911873	0.644387	0.886532	0.556521	0.42447	0.811656	0.622508	up	0.382776	0.317839	no	chr9	81541641	81544896	+	3	circRNA	-	ENSSSCT00000016700	CASD1	mRNA	chr9:81539855-81541640|chr9:81544896-81548329	CAS1 domain containing 1 [Source:HGNC Symbol;Acc:HGNC:16014]	GO:0016021(integral component of membrane);GO:0016020(membrane)	NA
circRNA2667	55.6596	62.5427	97.6785	2.14711	0	5.37533	71.9602	2.50748	up	4.84289	0.0318033	yes	chrX	41617864	41689033	-	2	circRNA	-	ENSSSCT00000013399	CASK	mRNA	chrX:41576379-41617863|chrX:41689033-41762688	calcium/calmodulin dependent serine protein kinase [Source:HGNC Symbol;Acc:HGNC:1497]	GO:0045202(synapse);GO:0031982(vesicle);GO:0016363(nuclear matrix);GO:0016323(basolateral plasma membrane);GO:0016020(membrane);GO:0005925(focal adhesion);GO:0005911(cell-cell junction);GO:0005829(cytosol);GO:0005737(cytoplasm);GO:0005730(nucleolus);GO:0005652(nuclear lamina);GO:0005634(nucleus);GO:0005604(basement membrane);GO:0090288(negative regulation of cellular response to growth factor sti…	04530(Tight junction)
circRNA5401	10.027	17.2672	16.2812	3.60596	5.32622	5.28114	14.5252	4.73777	up	1.61627	0.042729	yes	chrX	41408747	41433282	-	7	circRNA	-	ENSSSCT00000013399	CASK	mRNA	chrX:41402295-41408746|chrX:41433282-41447024	calcium/calmodulin dependent serine protein kinase [Source:HGNC Symbol;Acc:HGNC:1497]	GO:0045202(synapse);GO:0031982(vesicle);GO:0016363(nuclear matrix);GO:0016323(basolateral plasma membrane);GO:0016020(membrane);GO:0005925(focal adhesion);GO:0005911(cell-cell junction);GO:0005829(cytosol);GO:0005737(cytoplasm);GO:0005730(nucleolus);GO:0005652(nuclear lamina);GO:0005634(nucleus);GO:0005604(basement membrane);GO:0090288(negative regulation of cellular response to growth factor sti…	04530(Tight junction)
circRNA5402	21.849	10.0693	9.23738	5.60672	1.32362	0	13.7186	2.31011	up	2.57009	0.0914843	no	chrX	41481218	41493811	-	2	circRNA	-	ENSSSCT00000013399	CASK	mRNA	chrX:41457363-41481217|chrX:41493811-41505773	calcium/calmodulin dependent serine protein kinase [Source:HGNC Symbol;Acc:HGNC:1497]	GO:0045202(synapse);GO:0031982(vesicle);GO:0016363(nuclear matrix);GO:0016323(basolateral plasma membrane);GO:0016020(membrane);GO:0005925(focal adhesion);GO:0005911(cell-cell junction);GO:0005829(cytosol);GO:0005737(cytoplasm);GO:0005730(nucleolus);GO:0005652(nuclear lamina);GO:0005634(nucleus);GO:0005604(basement membrane);GO:0090288(negative regulation of cellular response to growth factor sti…	04530(Tight junction)
circRNA1717	2.98899	0.960082	0.158306	0	1.26203	0	1.36913	0.420677	up	1.70247	0.389372	no	chr17	42006762	42007015	-	1	circRNA	-	ENSSSCT00000027119	CBFA2T2	mRNA	chr17:42002600-42006761|chr17:42007015-42008714	CBFA2/RUNX1 translocation partner 2 [Source:HGNC Symbol;Acc:HGNC:1536]	GO:0005634(nucleus);GO:0060575(intestinal epithelial cell differentiation);GO:0045892(negative regulation of transcription, DNA-templated);GO:0045746(negative regulation of Notch signaling pathway);GO:0030855(epithelial cell differentiation);GO:0010976(positive regulation of neuron projection development);GO:0006355(regulation of transcription, DNA-templated);GO:0000122(negative regulation of tra…	NA
circRNA5208	3.11822	3.47921	1.32989	1.6682	2.07883	3.32089	2.64244	2.35597	up	0.165547	0.748597	no	chr17	42008715	42018906	-	3	circRNA	-	ENSSSCT00000027119	CBFA2T2	mRNA	chr17:42007015-42008714|chr17:42018906-42023480	CBFA2/RUNX1 translocation partner 2 [Source:HGNC Symbol;Acc:HGNC:1536]	GO:0005634(nucleus);GO:0060575(intestinal epithelial cell differentiation);GO:0045892(negative regulation of transcription, DNA-templated);GO:0045746(negative regulation of Notch signaling pathway);GO:0030855(epithelial cell differentiation);GO:0010976(positive regulation of neuron projection development);GO:0006355(regulation of transcription, DNA-templated);GO:0000122(negative regulation of tra…	NA
circRNA2257	2.56675	3.34239	2.84378	2.0017	2.89977	1.79097	2.91764	2.23081	up	0.387235	0.178598	no	chr9	51507059	51510311	+	2	circRNA	-	ENSSSCT00000016481	CBL	mRNA	chr9:51475324-51507058|chr9:51510311-51511669	Cbl proto-oncogene [Source:HGNC Symbol;Acc:HGNC:1541]	GO:0045121(membrane raft);GO:0016600(flotillin complex);GO:0005886(plasma membrane);GO:0005829(cytosol);GO:0005634(nucleus);GO:0048260(positive regulation of receptor-mediated endocytosis);GO:0043066(negative regulation of apoptotic process);GO:0042787(protein ubiquitination involved in ubiquitin-dependent protein catabolic process);GO:0042059(negative regulation of epidermal growth factor recept…	04120(Ubiquitin mediated proteolysis);04012(ErbB signaling pathway);04630(Jak-STAT signaling pathway);04144(Endocytosis);04660(T cell receptor signaling pathway);04910(Insulin signaling pathway);05200(Pathways in cancer);05205(Proteoglycans in cancer);05220(Chronic myeloid leukemia);05100(Bacterial invasion of epithelial cells)
circRNA6116	2.13134	3.60314	4.17069	7.94484	2.74708	2.89603	3.30172	4.52932	down	-0.456074	0.555701	no	chr9	51507059	51512265	+	4	circRNA	-	ENSSSCT00000016481	CBL	mRNA	chr9:51475324-51507058|chr9:51512265-51514093	Cbl proto-oncogene [Source:HGNC Symbol;Acc:HGNC:1541]	GO:0045121(membrane raft);GO:0016600(flotillin complex);GO:0005886(plasma membrane);GO:0005829(cytosol);GO:0005634(nucleus);GO:0048260(positive regulation of receptor-mediated endocytosis);GO:0043066(negative regulation of apoptotic process);GO:0042787(protein ubiquitination involved in ubiquitin-dependent protein catabolic process);GO:0042059(negative regulation of epidermal growth factor recept…	04120(Ubiquitin mediated proteolysis);04012(ErbB signaling pathway);04630(Jak-STAT signaling pathway);04144(Endocytosis);04660(T cell receptor signaling pathway);04910(Insulin signaling pathway);05200(Pathways in cancer);05205(Proteoglycans in cancer);05220(Chronic myeloid leukemia);05100(Bacterial invasion of epithelial cells)
circRNA2300	7.83582	6.24567	8.02351	0	0.612684	0	7.36833	0.204228	up	5.17309	0.00279325	yes	chr8	10503213	10507978	+	3	circRNA	-	ENSSSCT00000009559	CC2D2A	mRNA	chr8:10499302-10503212|chr8:10507978-10509791	coiled-coil and C2 domain containing 2A [Source:HGNC Symbol;Acc:HGNC:29253]	GO:0036038(MKS complex);GO:0035869(ciliary transition zone);GO:1990403(embryonic brain development);GO:1905515(non-motile cilium assembly);GO:1904491(protein localization to ciliary transition zone);GO:0060271(cilium assembly);GO:0044458(motile cilium assembly);GO:0043010(camera-type eye development);GO:0035082(axoneme assembly);GO:0007507(heart development);GO:0007368(determination of left/right…	NA
circRNA6735	14.5498	17.8012	9.97451	2.68021	1.24247	2.73767	14.1085	2.22012	up	2.66786	0.0299257	yes	chr8	10536893	10542067	+	2	circRNA	-	ENSSSCT00000009559	CC2D2A	mRNA	chr8:10534237-10536892|chr8:10542067-10543504	coiled-coil and C2 domain containing 2A [Source:HGNC Symbol;Acc:HGNC:29253]	GO:0036038(MKS complex);GO:0035869(ciliary transition zone);GO:1990403(embryonic brain development);GO:1905515(non-motile cilium assembly);GO:1904491(protein localization to ciliary transition zone);GO:0060271(cilium assembly);GO:0044458(motile cilium assembly);GO:0043010(camera-type eye development);GO:0035082(axoneme assembly);GO:0007507(heart development);GO:0007368(determination of left/right…	NA
circRNA2180	13.1537	17.626	15.7283	0	0	1.05107	15.5027	0.350356	up	5.46755	0.0046786	yes	chr1	179099938	179112850	+	3	circRNA	-	ENSSSCT00000005413	CCBE1	mRNA	chr1:179092002-179099937|chr1:179112850-179121310	collagen and calcium binding EGF domains 1 [Source:HGNC Symbol;Acc:HGNC:29426]	GO:0005615(extracellular space);GO:0005578(proteinaceous extracellular matrix);GO:1901492(positive regulation of lymphangiogenesis);GO:1900748(positive regulation of vascular endothelial growth factor signaling pathway);GO:0045766(positive regulation of angiogenesis);GO:0030324(lung development);GO:0010954(positive regulation of protein processing);GO:0010595(positive regulation of endothelial ce…	NA
circRNA229	5.56515	4.65706	6.1897	0	0	0.613124	5.47064	0.204375	up	4.74242	0.00229612	yes	chr1	179099938	179102403	+	2	circRNA	-	ENSSSCT00000005413	CCBE1	mRNA	chr1:179092002-179099937|chr1:179102403-179112746	collagen and calcium binding EGF domains 1 [Source:HGNC Symbol;Acc:HGNC:29426]	GO:0005615(extracellular space);GO:0005578(proteinaceous extracellular matrix);GO:1901492(positive regulation of lymphangiogenesis);GO:1900748(positive regulation of vascular endothelial growth factor signaling pathway);GO:0045766(positive regulation of angiogenesis);GO:0030324(lung development);GO:0010954(positive regulation of protein processing);GO:0010595(positive regulation of endothelial ce…	NA
circRNA2845	15.1888	21.4634	20.2705	0	0	0.925886	18.9743	0.308629	up	5.94203	0.00908646	yes	chr1	179091950	179112850	+	4	circRNA	-	ENSSSCT00000005413	CCBE1	mRNA	chr1:178906097-179091949|chr1:179112850-179121310	collagen and calcium binding EGF domains 1 [Source:HGNC Symbol;Acc:HGNC:29426]	GO:0005615(extracellular space);GO:0005578(proteinaceous extracellular matrix);GO:1901492(positive regulation of lymphangiogenesis);GO:1900748(positive regulation of vascular endothelial growth factor signaling pathway);GO:0045766(positive regulation of angiogenesis);GO:0030324(lung development);GO:0010954(positive regulation of protein processing);GO:0010595(positive regulation of endothelial ce…	NA
circRNA4307	4.05864	6.05818	6.97981	8.14138	5.49381	3.16511	5.69887	5.6001	up	0.0252247	0.956426	no	chr14	68175267	68178062	-	2	circRNA	-	ENSSSCT00000011177	CCDC6	mRNA	chr14:68168718-68175266|chr14:68178062-68195866	coiled-coil domain containing 6 [Source:HGNC Symbol;Acc:HGNC:18782]	GO:0005829(cytosol)	05200(Pathways in cancer);05216(Thyroid cancer)
circRNA5360	22.0716	27.1685	23.9961	2.23063	3.1596	1.05484	24.4121	2.14836	up	3.50629	0.00150025	yes	chr14	68195867	68212247	-	2	circRNA	-	ENSSSCT00000011177	CCDC6	mRNA	chr14:68178062-68195866|chr14:68212247-68273895	coiled-coil domain containing 6 [Source:HGNC Symbol;Acc:HGNC:18782]	GO:0005829(cytosol)	05200(Pathways in cancer);05216(Thyroid cancer)
circRNA6942	21.5923	19.4487	18.6174	20.0682	16.6399	10.5709	19.8861	15.7597	up	0.335528	0.27257	no	chr14	68165377	68175427	-	3	circRNA	-	ENSSSCT00000011177	CCDC6	mRNA	chr14:68156111-68165376|chr14:68175427-68177958	coiled-coil domain containing 6 [Source:HGNC Symbol;Acc:HGNC:18782]	GO:0005829(cytosol)	05200(Pathways in cancer);05216(Thyroid cancer)
circRNA2121	3.17072	2.20271	0.87871	0.290138	1.42438	0	2.08405	0.571507	up	1.86654	0.140788	no	chr2	97529618	97536736	-	4	circRNA	-	ENSSSCT00000015451	CCNH	mRNA	chr2:97520354-97529617|chr2:97536736-97538770	cyclin H [Source:HGNC Symbol;Acc:HGNC:1594]	GO:0070985(TFIIK complex);GO:0042585(germinal vesicle);GO:0019907(cyclin-dependent protein kinase activating kinase holoenzyme complex);GO:0005737(cytoplasm);GO:0005675(holo TFIIH complex);GO:0005654(nucleoplasm);GO:0005634(nucleus);GO:0000307(cyclin-dependent protein kinase holoenzyme complex);GO:1904146(positive regulation of meiotic cell cycle process involved in oocyte maturation);GO:1901409(…	03022(Basal transcription factors);03420(Nucleotide excision repair);04110(Cell cycle)
circRNA6015	3.006	1.99144	1.11943	0.369619	1.81458	0	2.03896	0.728067	up	1.48569	0.166859	no	chr2	97529618	97534578	-	3	circRNA	-	ENSSSCT00000015451	CCNH	mRNA	chr2:97520354-97529617|chr2:97534578-97536613	cyclin H [Source:HGNC Symbol;Acc:HGNC:1594]	GO:0070985(TFIIK complex);GO:0042585(germinal vesicle);GO:0019907(cyclin-dependent protein kinase activating kinase holoenzyme complex);GO:0005737(cytoplasm);GO:0005675(holo TFIIH complex);GO:0005654(nucleoplasm);GO:0005634(nucleus);GO:0000307(cyclin-dependent protein kinase holoenzyme complex);GO:1904146(positive regulation of meiotic cell cycle process involved in oocyte maturation);GO:1901409(…	03022(Basal transcription factors);03420(Nucleotide excision repair);04110(Cell cycle)
circRNA315	7.87176	9.31413	4.74698	21.8013	22.1449	20.2331	7.31096	21.3931	down	-1.54901	0.00350382	yes	chr8	76896146	76900030	-	4	circRNA	-	ENSSSCT00000009844	CCNI	mRNA	chr8:76888712-76896145|chr8:76900030-76910848	cyclin I [Source:HGNC Symbol;Acc:HGNC:1595]	GO:0051726(regulation of cell cycle)	NA
circRNA3427	13.1483	13.668	7.78961	27.0938	21.3012	21.7211	11.5353	23.372	down	-1.01873	0.0110637	yes	chr8	76896146	76911005	-	5	circRNA	-	ENSSSCT00000009844	CCNI	mRNA	chr8:76888712-76896145|chr8:76911005-76919088	cyclin I [Source:HGNC Symbol;Acc:HGNC:1595]	GO:0051726(regulation of cell cycle)	NA
circRNA6302	2.16803	0	0	0	7.48963	3.85065	0.722676	3.78009	down	-2.387	0.291027	no	chr16	68686151	68686364	+	1	circRNA	-	ENSSSCT00000018549	CCNJL	mRNA	chr16:68685965-68686150|chr16:68686364-68707253	cyclin J like [Source:HGNC Symbol;Acc:HGNC:25876]	GO:0005634(nucleus)	NA
circRNA6894	0	0.438914	0.260538	0.358442	3.00017	5.78429	0.233151	3.04763	down	-3.70835	0.213566	no	chr16	68707254	68709543	+	2	circRNA	-	ENSSSCT00000018549	CCNJL	mRNA	chr16:68686364-68707253|chr16:68709543-68711925	cyclin J like [Source:HGNC Symbol;Acc:HGNC:25876]	GO:0005634(nucleus)	NA
circRNA3650	28.3433	36.508	30.0473	1.18023	0.350718	1.77095	31.6329	1.10063	up	4.84502	0.00551674	yes	chr14	92425152	92505193	+	4	circRNA	-	ENSSSCT00000011332	CCSER2	mRNA	chr14:92416252-92425151|chr14:92505193-92515129	coiled-coil serine rich protein 2 [Source:HGNC Symbol;Acc:HGNC:29197]	GO:0015630(microtubule cytoskeleton);GO:0001578(microtubule bundle formation);GO:0008017(microtubule binding)	NA
circRNA4311	14.9352	15.5015	12.2787	2.52859	0.445917	0.997974	14.2385	1.32416	up	3.42664	0.000938944	yes	chr14	92380920	92416252	+	4	circRNA	-	ENSSSCT00000011332	CCSER2	mRNA	chr14:92349228-92380919|chr14:92416252-92425151	coiled-coil serine rich protein 2 [Source:HGNC Symbol;Acc:HGNC:29197]	GO:0015630(microtubule cytoskeleton);GO:0001578(microtubule bundle formation);GO:0008017(microtubule binding)	NA
circRNA521	23.6447	21.2851	20.4027	0.450753	1.8897	1.09	21.7775	1.14348	up	4.25133	0.000528664	yes	chr14	92407605	92425347	+	3	circRNA	-	ENSSSCT00000011332	CCSER2	mRNA	chr14:92384221-92407604|chr14:92425347-92495904	coiled-coil serine rich protein 2 [Source:HGNC Symbol;Acc:HGNC:29197]	GO:0015630(microtubule cytoskeleton);GO:0001578(microtubule bundle formation);GO:0008017(microtubule binding)	NA
circRNA848	7.0186	6.6139	7.80977	0.798577	2.9798	1.9311	7.14742	1.90316	up	1.90903	0.00462445	yes	chr14	92407605	92416252	+	2	circRNA	-	ENSSSCT00000011332	CCSER2	mRNA	chr14:92384221-92407604|chr14:92416252-92425151	coiled-coil serine rich protein 2 [Source:HGNC Symbol;Acc:HGNC:29197]	GO:0015630(microtubule cytoskeleton);GO:0001578(microtubule bundle formation);GO:0008017(microtubule binding)	NA
circRNA849	25.1712	27.9424	29.0803	1.43238	0.572422	1.41894	27.398	1.14125	up	4.58538	0.00116223	yes	chr14	92425152	92495988	+	2	circRNA	-	ENSSSCT00000011332	CCSER2	mRNA	chr14:92416252-92425151|chr14:92495988-92502455	coiled-coil serine rich protein 2 [Source:HGNC Symbol;Acc:HGNC:29197]	GO:0015630(microtubule cytoskeleton);GO:0001578(microtubule bundle formation);GO:0008017(microtubule binding)	NA
circRNA2000	10.7865	10.4607	3.09813	5.35059	17.3854	13.0264	8.11511	11.9208	down	-0.554795	0.433137	no	chr4	102442529	102445154	+	2	circRNA	-	ENSSSCT00000007106	CCT3	mRNA	chr4:102442373-102442528|chr4:102445154-102447338	T-complex protein 1 subunit gamma [Source:RefSeq peptide;Acc:NP_001231109]	GO:0070062(extracellular exosome);GO:0044297(cell body);GO:0043209(myelin sheath);GO:0005886(plasma membrane);GO:0005874(microtubule);GO:0005832(chaperonin-containing T-complex);GO:0005829(cytosol);GO:0005737(cytoplasm);GO:0002199(zona pellucida receptor complex);GO:1904874(positive regulation of telomerase RNA localization to Cajal body);GO:1904871(positive regulation of protein localization to …	NA
circRNA613	12.1403	5.72868	0.775559	9.1105	14.0699	15.1953	6.21483	12.7919	down	-1.04144	0.175626	no	chr4	102444968	102447488	+	2	circRNA	-	ENSSSCT00000007106	CCT3	mRNA	chr4:102442646-102444967|chr4:102447488-102449014	T-complex protein 1 subunit gamma [Source:RefSeq peptide;Acc:NP_001231109]	GO:0070062(extracellular exosome);GO:0044297(cell body);GO:0043209(myelin sheath);GO:0005886(plasma membrane);GO:0005874(microtubule);GO:0005832(chaperonin-containing T-complex);GO:0005829(cytosol);GO:0005737(cytoplasm);GO:0002199(zona pellucida receptor complex);GO:1904874(positive regulation of telomerase RNA localization to Cajal body);GO:1904871(positive regulation of protein localization to …	NA
circRNA151	6.94068	4.93895	3.56289	3.04608	5.17353	3.20376	5.14751	3.80779	up	0.434919	0.332156	no	chr3	83769230	83771966	+	3	circRNA	-	ENSSSCT00000009172	CCT4	mRNA	chr3:83768710-83769229|chr3:83771966-83773646	chaperonin containing TCP1 subunit 4 [Source:HGNC Symbol;Acc:HGNC:1617]	GO:0070062(extracellular exosome);GO:0044297(cell body);GO:0005874(microtubule);GO:0005832(chaperonin-containing T-complex);GO:0005829(cytosol);GO:0005813(centrosome);GO:0005737(cytoplasm);GO:0005654(nucleoplasm);GO:0002199(zona pellucida receptor complex);GO:1904874(positive regulation of telomerase RNA localization to Cajal body);GO:1904871(positive regulation of protein localization to Cajal b…	NA
circRNA2774	4.75888	3.01528	2.29948	6.22025	5.42931	4.23027	3.35788	5.29328	down	-0.656611	0.109991	no	chr3	83767878	83771966	+	5	circRNA	-	ENSSSCT00000009172	CCT4	mRNA	chr3:83765395-83767877|chr3:83771966-83773646	chaperonin containing TCP1 subunit 4 [Source:HGNC Symbol;Acc:HGNC:1617]	GO:0070062(extracellular exosome);GO:0044297(cell body);GO:0005874(microtubule);GO:0005832(chaperonin-containing T-complex);GO:0005829(cytosol);GO:0005813(centrosome);GO:0005737(cytoplasm);GO:0005654(nucleoplasm);GO:0002199(zona pellucida receptor complex);GO:1904874(positive regulation of telomerase RNA localization to Cajal body);GO:1904871(positive regulation of protein localization to Cajal b…	NA
circRNA1299	2.74723	3.03658	3.62042	4.18606	4.65687	2.81896	3.13474	3.8873	down	-0.310421	0.308649	no	chr3	72742889	72743914	-	2	circRNA	-	ENSSSCT00000009094	CCT7	mRNA	chr3:72740260-72742888|chr3:72743914-72744275	T-complex protein 1 subunit eta [Source:RefSeq peptide;Acc:NP_001163993]	GO:0070062(extracellular exosome);GO:0044297(cell body);GO:0005874(microtubule);GO:0005832(chaperonin-containing T-complex);GO:0005739(mitochondrion);GO:0005737(cytoplasm);GO:0002199(zona pellucida receptor complex);GO:1904874(positive regulation of telomerase RNA localization to Cajal body);GO:1904871(positive regulation of protein localization to Cajal body);GO:1904851(positive regulation of es…	NA
circRNA3211	12.1513	14.0317	15.8924	15.3446	16.0914	14.9252	14.0251	15.4537	down	-0.139942	0.316061	no	chr3	72732653	72734073	-	3	circRNA	-	ENSSSCT00000009094	CCT7	mRNA	chr3:72731924-72732652|chr3:72734073-72735148	T-complex protein 1 subunit eta [Source:RefSeq peptide;Acc:NP_001163993]	GO:0070062(extracellular exosome);GO:0044297(cell body);GO:0005874(microtubule);GO:0005832(chaperonin-containing T-complex);GO:0005739(mitochondrion);GO:0005737(cytoplasm);GO:0002199(zona pellucida receptor complex);GO:1904874(positive regulation of telomerase RNA localization to Cajal body);GO:1904871(positive regulation of protein localization to Cajal body);GO:1904851(positive regulation of es…	NA
circRNA4623	10.5717	6.87893	7.94844	17.5226	9.35301	2.43348	8.46637	9.76971	down	-0.206572	0.79648	no	chr3	72740135	72743914	-	3	circRNA	-	ENSSSCT00000009094	CCT7	mRNA	chr3:72738630-72740134|chr3:72743914-72744275	T-complex protein 1 subunit eta [Source:RefSeq peptide;Acc:NP_001163993]	GO:0070062(extracellular exosome);GO:0044297(cell body);GO:0005874(microtubule);GO:0005832(chaperonin-containing T-complex);GO:0005739(mitochondrion);GO:0005737(cytoplasm);GO:0002199(zona pellucida receptor complex);GO:1904874(positive regulation of telomerase RNA localization to Cajal body);GO:1904871(positive regulation of protein localization to Cajal body);GO:1904851(positive regulation of es…	NA
circRNA5093	8.12604	8.28613	8.83303	5.14568	4.0301	3.59999	8.41507	4.25859	up	0.982598	0.00474722	no	chr13	202715441	202720405	-	8	circRNA	-	ENSSSCT00000023076	CCT8	mRNA	chr13:202714724-202715440|chr13:202720405-202721923	chaperonin containing TCP1 subunit 8 [Source:HGNC Symbol;Acc:HGNC:1623]	GO:0070062(extracellular exosome);GO:0045111(intermediate filament cytoskeleton);GO:0044297(cell body);GO:0005874(microtubule);GO:0005832(chaperonin-containing T-complex);GO:0005829(cytosol);GO:0005813(centrosome);GO:0005737(cytoplasm);GO:0005654(nucleoplasm);GO:0002199(zona pellucida receptor complex);GO:1904874(positive regulation of telomerase RNA localization to Cajal body);GO:1904871(positiv…	NA
circRNA6210	2.5992	4.89543	4.73056	10.5758	5.91128	0.494621	4.07507	5.66057	down	-0.474125	0.645128	no	chr13	202714032	202714724	-	3	circRNA	-	ENSSSCT00000023076	CCT8	mRNA	chr13:202710574-202714031|chr13:202714724-202715440	chaperonin containing TCP1 subunit 8 [Source:HGNC Symbol;Acc:HGNC:1623]	GO:0070062(extracellular exosome);GO:0045111(intermediate filament cytoskeleton);GO:0044297(cell body);GO:0005874(microtubule);GO:0005832(chaperonin-containing T-complex);GO:0005829(cytosol);GO:0005813(centrosome);GO:0005737(cytoplasm);GO:0005654(nucleoplasm);GO:0002199(zona pellucida receptor complex);GO:1904874(positive regulation of telomerase RNA localization to Cajal body);GO:1904871(positiv…	NA
circRNA219	6.38551	5.99127	0.480595	0	0	0	4.28579	0	up	Inf	0.153503	no	chr1	103139248	103140522	-	2	circRNA	-	ENSSSCT00000035901	CD109	mRNA	chr1:103137273-103139247|chr1:103140522-103144151	CD109 molecule [Source:HGNC Symbol;Acc:HGNC:21685]	GO:0016021(integral component of membrane);GO:0016020(membrane);GO:0005615(extracellular space);GO:0005576(extracellular region);GO:0010951(negative regulation of endopeptidase activity);GO:0004866(endopeptidase inhibitor activity);GO:0009986(cell surface);GO:0072675(osteoclast fusion);GO:0061045(negative regulation of wound healing);GO:0045616(regulation of keratinocyte differentiation);GO:00305…	NA
circRNA2833	5.34382	4.16856	5.82223	0.0834383	0.161165	0	5.11154	0.0815343	up	5.97021	0.00893438	yes	chr1	103180403	103206438	-	6	circRNA	-	ENSSSCT00000035901	CD109	mRNA	chr1:103178047-103180402|chr1:103206438-103209532	CD109 molecule [Source:HGNC Symbol;Acc:HGNC:21685]	GO:0016021(integral component of membrane);GO:0016020(membrane);GO:0005615(extracellular space);GO:0005576(extracellular region);GO:0010951(negative regulation of endopeptidase activity);GO:0004866(endopeptidase inhibitor activity);GO:0009986(cell surface);GO:0072675(osteoclast fusion);GO:0061045(negative regulation of wound healing);GO:0045616(regulation of keratinocyte differentiation);GO:00305…	NA
circRNA5579	1.6433	2.63919	2.61102	10.0581	0.925126	1.65623	2.29784	4.21316	down	-0.874626	0.581153	no	chr1	103254748	103254978	-	1	circRNA	-	ENSSSCT00000035901	CD109	mRNA	chr1:103248684-103254747|chr1:103254978-103261527	CD109 molecule [Source:HGNC Symbol;Acc:HGNC:21685]	GO:0016021(integral component of membrane);GO:0016020(membrane);GO:0005615(extracellular space);GO:0005576(extracellular region);GO:0010951(negative regulation of endopeptidase activity);GO:0004866(endopeptidase inhibitor activity);GO:0009986(cell surface);GO:0072675(osteoclast fusion);GO:0061045(negative regulation of wound healing);GO:0045616(regulation of keratinocyte differentiation);GO:00305…	NA
circRNA4589	6.89577	9.6125	11.8715	1.05371	0.381615	0.700713	9.45991	0.712011	up	3.73185	0.0242726	yes	chr4	129315285	129336726	-	3	circRNA	-	ENSSSCT00000007517	CDC14A	mRNA	chr4:129302281-129315284|chr4:129336726-129481286	cell division cycle 14A [Source:HGNC Symbol;Acc:HGNC:1718]	GO:0072686(mitotic spindle);GO:0016604(nuclear body);GO:0005829(cytosol);GO:0005813(centrosome);GO:0005737(cytoplasm);GO:0005654(nucleoplasm);GO:0005634(nucleus);GO:0000922(spindle pole);GO:0071850(mitotic cell cycle arrest);GO:0060271(cilium assembly);GO:0051256(mitotic spindle midzone assembly);GO:0035335(peptidyl-tyrosine dephosphorylation);GO:0016311(dephosphorylation);GO:0007096(regulation o…	NA
circRNA5506	108.067	125.507	127.862	15.8839	13.6651	20.2999	120.479	16.6163	up	2.85811	0.00177755	yes	chr4	129315285	129481379	-	4	circRNA	-	ENSSSCT00000007517	CDC14A	mRNA	chr4:129302281-129315284|chr4:129481379-129492774	cell division cycle 14A [Source:HGNC Symbol;Acc:HGNC:1718]	GO:0072686(mitotic spindle);GO:0016604(nuclear body);GO:0005829(cytosol);GO:0005813(centrosome);GO:0005737(cytoplasm);GO:0005654(nucleoplasm);GO:0005634(nucleus);GO:0000922(spindle pole);GO:0071850(mitotic cell cycle arrest);GO:0060271(cilium assembly);GO:0051256(mitotic spindle midzone assembly);GO:0035335(peptidyl-tyrosine dephosphorylation);GO:0016311(dephosphorylation);GO:0007096(regulation o…	NA
circRNA5943	23.7069	25.2517	22.7273	0.418296	3.48431	0.667598	23.8953	1.5234	up	3.97136	9.23435e-05	yes	chr4	129295358	129336726	-	5	circRNA	-	ENSSSCT00000007517	CDC14A	mRNA	chr4:129286926-129295357|chr4:129336726-129481286	cell division cycle 14A [Source:HGNC Symbol;Acc:HGNC:1718]	GO:0072686(mitotic spindle);GO:0016604(nuclear body);GO:0005829(cytosol);GO:0005813(centrosome);GO:0005737(cytoplasm);GO:0005654(nucleoplasm);GO:0005634(nucleus);GO:0000922(spindle pole);GO:0071850(mitotic cell cycle arrest);GO:0060271(cilium assembly);GO:0051256(mitotic spindle midzone assembly);GO:0035335(peptidyl-tyrosine dephosphorylation);GO:0016311(dephosphorylation);GO:0007096(regulation o…	NA
circRNA1641	2.29144	1.0479	0	2.77617	1.74643	0	1.11311	1.50753	down	-0.437591	0.726109	no	chr12	16882081	16883793	+	2	circRNA	-	ENSSSCT00000018844	CDC27	mRNA	chr12:16878244-16882080|chr12:16883793-16887249	cell division cycle 27 [Source:HGNC Symbol;Acc:HGNC:1728]	GO:0005876(spindle microtubule);GO:0005813(centrosome);GO:0005737(cytoplasm);GO:0005680(anaphase-promoting complex);GO:0005654(nucleoplasm);GO:0005634(nucleus);GO:0070979(protein K11-linked ubiquitination);GO:0007091(metaphase/anaphase transition of mitotic cell cycle);GO:0019903(protein phosphatase binding)	04120(Ubiquitin mediated proteolysis);04110(Cell cycle);04114(Oocyte meiosis);04914(Progesterone-mediated oocyte maturation);05166(HTLV-I infection)
circRNA3502	3.39767	1.97572	1.4241	5.43592	2.5971	1.41018	2.26583	3.14774	down	-0.474274	0.556253	no	chr12	16882081	16887367	+	3	circRNA	-	ENSSSCT00000018844	CDC27	mRNA	chr12:16878244-16882080|chr12:16887367-16891783	cell division cycle 27 [Source:HGNC Symbol;Acc:HGNC:1728]	GO:0005876(spindle microtubule);GO:0005813(centrosome);GO:0005737(cytoplasm);GO:0005680(anaphase-promoting complex);GO:0005654(nucleoplasm);GO:0005634(nucleus);GO:0070979(protein K11-linked ubiquitination);GO:0007091(metaphase/anaphase transition of mitotic cell cycle);GO:0019903(protein phosphatase binding)	04120(Ubiquitin mediated proteolysis);04110(Cell cycle);04114(Oocyte meiosis);04914(Progesterone-mediated oocyte maturation);05166(HTLV-I infection)
circRNA5103	6.02543	8.59319	9.1908	18.0974	7.02171	12.9492	7.93647	12.6894	down	-0.677058	0.27277	no	chr12	16845381	16852434	+	3	circRNA	-	ENSSSCT00000018844	CDC27	mRNA	chr12:16845037-16845380|chr12:16852434-16861241	cell division cycle 27 [Source:HGNC Symbol;Acc:HGNC:1728]	GO:0005876(spindle microtubule);GO:0005813(centrosome);GO:0005737(cytoplasm);GO:0005680(anaphase-promoting complex);GO:0005654(nucleoplasm);GO:0005634(nucleus);GO:0070979(protein K11-linked ubiquitination);GO:0007091(metaphase/anaphase transition of mitotic cell cycle);GO:0019903(protein phosphatase binding)	04120(Ubiquitin mediated proteolysis);04110(Cell cycle);04114(Oocyte meiosis);04914(Progesterone-mediated oocyte maturation);05166(HTLV-I infection)
circRNA5104	5.10199	2.89198	1.58462	4.55698	2.6172	2.75453	3.19286	3.30957	down	-0.0517923	0.928234	no	chr12	16882081	16891912	+	4	circRNA	-	ENSSSCT00000018844	CDC27	mRNA	chr12:16878244-16882080|chr12:16891912-16899444	cell division cycle 27 [Source:HGNC Symbol;Acc:HGNC:1728]	GO:0005876(spindle microtubule);GO:0005813(centrosome);GO:0005737(cytoplasm);GO:0005680(anaphase-promoting complex);GO:0005654(nucleoplasm);GO:0005634(nucleus);GO:0070979(protein K11-linked ubiquitination);GO:0007091(metaphase/anaphase transition of mitotic cell cycle);GO:0019903(protein phosphatase binding)	04120(Ubiquitin mediated proteolysis);04110(Cell cycle);04114(Oocyte meiosis);04914(Progesterone-mediated oocyte maturation);05166(HTLV-I infection)
circRNA2717	13.8888	12.9665	8.85215	7.97284	11.9611	9.91064	11.9025	9.94818	up	0.258759	0.372792	no	chr6	74096530	74110479	+	4	circRNA	-	ENSSSCT00000003911	CDC42	mRNA	chr6:74057281-74096529|chr6:74110479-74113824	cell division cycle 42 [Source:HGNC Symbol;Acc:HGNC:1736]	GO:0072686(mitotic spindle);GO:0051233(spindle midzone);GO:0030496(midbody);GO:0016020(membrane);GO:0005886(plasma membrane);GO:0005856(cytoskeleton);GO:0005815(microtubule organizing center);GO:0005737(cytoplasm);GO:1900026(positive regulation of substrate adhesion-dependent cell spreading);GO:0060997(dendritic spine morphogenesis);GO:0051988(regulation of attachment of spindle microtubules to k…	04014(Ras signaling pathway);04015(Rap1 signaling pathway);04010(MAPK signaling pathway);04370(VEGF signaling pathway);04144(Endocytosis);04810(Regulation of actin cytoskeleton);04510(Focal adhesion);04520(Adherens junction);04530(Tight junction);04660(T cell receptor signaling pathway);04666(Fc gamma R-mediated phagocytosis);04670(Leukocyte transendothelial migration);04062(Chemokine signaling p…
circRNA4440	14.4468	11.9477	7.17654	3.95659	3.43553	5.83192	11.1903	4.40801	up	1.34405	0.0735756	no	chr6	74099604	74110479	+	3	circRNA	-	ENSSSCT00000003911	CDC42	mRNA	chr6:74096684-74099603|chr6:74110479-74113824	cell division cycle 42 [Source:HGNC Symbol;Acc:HGNC:1736]	GO:0072686(mitotic spindle);GO:0051233(spindle midzone);GO:0030496(midbody);GO:0016020(membrane);GO:0005886(plasma membrane);GO:0005856(cytoskeleton);GO:0005815(microtubule organizing center);GO:0005737(cytoplasm);GO:1900026(positive regulation of substrate adhesion-dependent cell spreading);GO:0060997(dendritic spine morphogenesis);GO:0051988(regulation of attachment of spindle microtubules to k…	04014(Ras signaling pathway);04015(Rap1 signaling pathway);04010(MAPK signaling pathway);04370(VEGF signaling pathway);04144(Endocytosis);04810(Regulation of actin cytoskeleton);04510(Focal adhesion);04520(Adherens junction);04530(Tight junction);04660(T cell receptor signaling pathway);04666(Fc gamma R-mediated phagocytosis);04670(Leukocyte transendothelial migration);04062(Chemokine signaling p…
circRNA2479	28.1538	20.9314	25.1311	6.77665	7.61321	8.38753	24.7388	7.59247	up	1.70413	0.0115628	yes	chr10	16978306	17000982	-	3	circRNA	-	ENSSSCT00000011884	CDC42BPA	mRNA	chr10:16968117-16978305|chr10:17000982-17004620	CDC42 binding protein kinase alpha [Source:HGNC Symbol;Acc:HGNC:1737]	GO:0070062(extracellular exosome);GO:0042641(actomyosin);GO:0035556(intracellular signal transduction);GO:0031532(actin cytoskeleton reorganization);GO:0031032(actomyosin structure organization);GO:0016477(cell migration);GO:0016310(phosphorylation);GO:0006468(protein phosphorylation);GO:0046872(metal ion binding);GO:0042802(identical protein binding);GO:0016740(transferase activity);GO:0016301(k…	NA
circRNA2480	1.48814	0.716997	1.33762	0.850428	0.807853	1.4982	1.18092	1.05216	up	0.166556	0.7122	no	chr10	17067380	17073695	-	3	circRNA	-	ENSSSCT00000011884	CDC42BPA	mRNA	chr10:17056412-17067379|chr10:17073695-17075429	CDC42 binding protein kinase alpha [Source:HGNC Symbol;Acc:HGNC:1737]	GO:0070062(extracellular exosome);GO:0042641(actomyosin);GO:0035556(intracellular signal transduction);GO:0031532(actin cytoskeleton reorganization);GO:0031032(actomyosin structure organization);GO:0016477(cell migration);GO:0016310(phosphorylation);GO:0006468(protein phosphorylation);GO:0046872(metal ion binding);GO:0042802(identical protein binding);GO:0016740(transferase activity);GO:0016301(k…	NA
circRNA4176	4.47207	3.03745	4.86937	9.74224	8.67226	6.17559	4.1263	8.1967	down	-0.990195	0.0415723	no	chr10	17067380	17146941	-	6	circRNA	-	ENSSSCT00000011884	CDC42BPA	mRNA	chr10:17056412-17067379|chr10:17146941-17161156	CDC42 binding protein kinase alpha [Source:HGNC Symbol;Acc:HGNC:1737]	GO:0070062(extracellular exosome);GO:0042641(actomyosin);GO:0035556(intracellular signal transduction);GO:0031532(actin cytoskeleton reorganization);GO:0031032(actomyosin structure organization);GO:0016477(cell migration);GO:0016310(phosphorylation);GO:0006468(protein phosphorylation);GO:0046872(metal ion binding);GO:0042802(identical protein binding);GO:0016740(transferase activity);GO:0016301(k…	NA
circRNA4177	5.72629	3.02664	3.87024	0.714615	1.0014	1.92323	4.20773	1.21308	up	1.79436	0.0465732	yes	chr10	17146793	17170362	-	3	circRNA	-	ENSSSCT00000011884	CDC42BPA	mRNA	chr10:17127798-17146792|None	CDC42 binding protein kinase alpha [Source:HGNC Symbol;Acc:HGNC:1737]	GO:0070062(extracellular exosome);GO:0042641(actomyosin);GO:0035556(intracellular signal transduction);GO:0031532(actin cytoskeleton reorganization);GO:0031032(actomyosin structure organization);GO:0016477(cell migration);GO:0016310(phosphorylation);GO:0006468(protein phosphorylation);GO:0046872(metal ion binding);GO:0042802(identical protein binding);GO:0016740(transferase activity);GO:0016301(k…	NA
circRNA5714	1.05899	0.549105	1.10572	0.61841	0.740964	1.36172	0.904605	0.90703	down	-0.00386267	0.993774	no	chr10	17067380	17075630	-	4	circRNA	-	ENSSSCT00000011884	CDC42BPA	mRNA	chr10:17056412-17067379|chr10:17075630-17127704	CDC42 binding protein kinase alpha [Source:HGNC Symbol;Acc:HGNC:1737]	GO:0070062(extracellular exosome);GO:0042641(actomyosin);GO:0035556(intracellular signal transduction);GO:0031532(actin cytoskeleton reorganization);GO:0031032(actomyosin structure organization);GO:0016477(cell migration);GO:0016310(phosphorylation);GO:0006468(protein phosphorylation);GO:0046872(metal ion binding);GO:0042802(identical protein binding);GO:0016740(transferase activity);GO:0016301(k…	NA
circRNA6858	5.29736	3.43837	5.19974	8.28765	7.42161	5.74803	4.64516	7.15243	down	-0.622707	0.0617798	no	chr10	17067380	17170362	-	8	circRNA	-	ENSSSCT00000011884	CDC42BPA	mRNA	chr10:17056412-17067379|None	CDC42 binding protein kinase alpha [Source:HGNC Symbol;Acc:HGNC:1737]	GO:0070062(extracellular exosome);GO:0042641(actomyosin);GO:0035556(intracellular signal transduction);GO:0031532(actin cytoskeleton reorganization);GO:0031032(actomyosin structure organization);GO:0016477(cell migration);GO:0016310(phosphorylation);GO:0006468(protein phosphorylation);GO:0046872(metal ion binding);GO:0042802(identical protein binding);GO:0016740(transferase activity);GO:0016301(k…	NA
circRNA1895	45.5627	29.3536	37.4795	16.9886	8.657	5.54082	37.4652	10.3955	up	1.8496	0.0117389	yes	chr7	128846360	128849189	-	3	circRNA	-	ENSSSCT00000002802	CDC42BPB	mRNA	chr7:128843222-128846359|chr7:128849189-128850748	CDC42 binding protein kinase beta [Source:HGNC Symbol;Acc:HGNC:1738]	GO:0070062(extracellular exosome);GO:0042641(actomyosin);GO:0035556(intracellular signal transduction);GO:0031032(actomyosin structure organization);GO:0016477(cell migration);GO:0016310(phosphorylation);GO:0006468(protein phosphorylation);GO:0046872(metal ion binding);GO:0016740(transferase activity);GO:0016301(kinase activity);GO:0005524(ATP binding);GO:0004674(protein serine/threonine kinase a…	NA
circRNA29	64.2926	75.6043	76.0197	10.2989	17.8763	22.2737	71.9722	16.8163	up	2.09758	0.00046636	yes	chr7	128873317	128881993	-	3	circRNA	-	ENSSSCT00000002802	CDC42BPB	mRNA	chr7:128866610-128873316|chr7:128881993-128887682	CDC42 binding protein kinase beta [Source:HGNC Symbol;Acc:HGNC:1738]	GO:0070062(extracellular exosome);GO:0042641(actomyosin);GO:0035556(intracellular signal transduction);GO:0031032(actomyosin structure organization);GO:0016477(cell migration);GO:0016310(phosphorylation);GO:0006468(protein phosphorylation);GO:0046872(metal ion binding);GO:0016740(transferase activity);GO:0016301(kinase activity);GO:0005524(ATP binding);GO:0004674(protein serine/threonine kinase a…	NA
circRNA3716	25.9046	14.8813	26.2788	10.2363	7.46703	2.54905	22.3549	6.75079	up	1.72746	0.0323203	yes	chr7	128857556	128858931	-	2	circRNA	-	ENSSSCT00000002802	CDC42BPB	mRNA	chr7:128856323-128857555|chr7:128858931-128859001	CDC42 binding protein kinase beta [Source:HGNC Symbol;Acc:HGNC:1738]	GO:0070062(extracellular exosome);GO:0042641(actomyosin);GO:0035556(intracellular signal transduction);GO:0031032(actomyosin structure organization);GO:0016477(cell migration);GO:0016310(phosphorylation);GO:0006468(protein phosphorylation);GO:0046872(metal ion binding);GO:0016740(transferase activity);GO:0016301(kinase activity);GO:0005524(ATP binding);GO:0004674(protein serine/threonine kinase a…	NA
circRNA882	26.8533	35.405	45.2583	7.03789	14.0985	6.11489	35.8389	9.08377	up	1.98016	0.0221439	yes	chr7	128864504	128873465	-	3	circRNA	-	ENSSSCT00000002802	CDC42BPB	mRNA	chr7:128862102-128864503|chr7:128873465-128880004	CDC42 binding protein kinase beta [Source:HGNC Symbol;Acc:HGNC:1738]	GO:0070062(extracellular exosome);GO:0042641(actomyosin);GO:0035556(intracellular signal transduction);GO:0031032(actomyosin structure organization);GO:0016477(cell migration);GO:0016310(phosphorylation);GO:0006468(protein phosphorylation);GO:0046872(metal ion binding);GO:0016740(transferase activity);GO:0016301(kinase activity);GO:0005524(ATP binding);GO:0004674(protein serine/threonine kinase a…	NA
circRNA1489	8.74181	7.90025	10.3585	0.431847	1.85594	0.723687	9.00018	1.00382	up	3.16445	0.00169524	yes	chr18	59628324	59641061	-	4	circRNA	-	ENSSSCT00000018255	CDK13	mRNA	chr18:59617392-59628323|chr18:59641061-59685145	cyclin dependent kinase 13 [Source:HGNC Symbol;Acc:HGNC:1733]	GO:0019908(nuclear cyclin-dependent protein kinase holoenzyme complex);GO:0016607(nuclear speck);GO:0008024(cyclin/CDK positive transcription elongation factor complex);GO:0005829(cytosol);GO:0005794(Golgi apparatus);GO:0005694(chromosome);GO:0005615(extracellular space);GO:0002945(cyclin K-CDK13 complex);GO:2000737(negative regulation of stem cell differentiation);GO:0070816(phosphorylation of R…	NA
circRNA1490	0	0	0	0.410605	2.0188	0	0	0.809801	down	-Inf	0.319162	no	chr18	59639958	59641061	-	2	circRNA	-	ENSSSCT00000018255	CDK13	mRNA	chr18:59628599-59639957|chr18:59641061-59685145	cyclin dependent kinase 13 [Source:HGNC Symbol;Acc:HGNC:1733]	GO:0019908(nuclear cyclin-dependent protein kinase holoenzyme complex);GO:0016607(nuclear speck);GO:0008024(cyclin/CDK positive transcription elongation factor complex);GO:0005829(cytosol);GO:0005794(Golgi apparatus);GO:0005694(chromosome);GO:0005615(extracellular space);GO:0002945(cyclin K-CDK13 complex);GO:2000737(negative regulation of stem cell differentiation);GO:0070816(phosphorylation of R…	NA
circRNA4881	42.2133	43.3621	56.1457	3.84678	5.07756	1.55024	47.2404	3.49153	up	3.75809	0.0076892	yes	chr18	59628324	59685316	-	5	circRNA	-	ENSSSCT00000018255	CDK13	mRNA	chr18:59617392-59628323|chr18:59685316-59687204	cyclin dependent kinase 13 [Source:HGNC Symbol;Acc:HGNC:1733]	GO:0019908(nuclear cyclin-dependent protein kinase holoenzyme complex);GO:0016607(nuclear speck);GO:0008024(cyclin/CDK positive transcription elongation factor complex);GO:0005829(cytosol);GO:0005794(Golgi apparatus);GO:0005694(chromosome);GO:0005615(extracellular space);GO:0002945(cyclin K-CDK13 complex);GO:2000737(negative regulation of stem cell differentiation);GO:0070816(phosphorylation of R…	NA
circRNA1500	6.38684	9.65133	9.80533	0.285573	0	0.593229	8.6145	0.292934	up	4.87812	0.0157228	yes	chr9	77643009	77725461	+	3	circRNA	-	ENSSSCT00000016680	CDK14	mRNA	chr9:77626526-77643008|chr9:77725461-77788799	cyclin dependent kinase 14 [Source:HGNC Symbol;Acc:HGNC:8883]	GO:0005886(plasma membrane);GO:0005829(cytosol);GO:0005737(cytoplasm);GO:0005634(nucleus);GO:0000308(cytoplasmic cyclin-dependent protein kinase holoenzyme complex);GO:0060828(regulation of canonical Wnt signaling pathway);GO:0051726(regulation of cell cycle);GO:0006468(protein phosphorylation);GO:0000086(G2/M transition of mitotic cell cycle);GO:0030332(cyclin binding);GO:0005524(ATP binding);GO…	NA
circRNA2259	1.08588	0.550725	0	0	3.43867	2.19329	0.545536	1.87732	down	-1.78293	0.315393	no	chr9	77414305	77414550	+	1	circRNA	-	ENSSSCT00000016680	CDK14	mRNA	chr9:77278171-77414304|chr9:77414550-77428763	cyclin dependent kinase 14 [Source:HGNC Symbol;Acc:HGNC:8883]	GO:0005886(plasma membrane);GO:0005829(cytosol);GO:0005737(cytoplasm);GO:0005634(nucleus);GO:0000308(cytoplasmic cyclin-dependent protein kinase holoenzyme complex);GO:0060828(regulation of canonical Wnt signaling pathway);GO:0051726(regulation of cell cycle);GO:0006468(protein phosphorylation);GO:0000086(G2/M transition of mitotic cell cycle);GO:0030332(cyclin binding);GO:0005524(ATP binding);GO…	NA
circRNA2886	11.705	12.7856	15.4726	0	2.00929	1.84083	13.3211	1.28337	up	3.3757	0.00202904	yes	chr9	77414305	77469954	+	3	circRNA	-	ENSSSCT00000016680	CDK14	mRNA	chr9:77278171-77414304|chr9:77469954-77586915	cyclin dependent kinase 14 [Source:HGNC Symbol;Acc:HGNC:8883]	GO:0005886(plasma membrane);GO:0005829(cytosol);GO:0005737(cytoplasm);GO:0005634(nucleus);GO:0000308(cytoplasmic cyclin-dependent protein kinase holoenzyme complex);GO:0060828(regulation of canonical Wnt signaling pathway);GO:0051726(regulation of cell cycle);GO:0006468(protein phosphorylation);GO:0000086(G2/M transition of mitotic cell cycle);GO:0030332(cyclin binding);GO:0005524(ATP binding);GO…	NA
circRNA3389	6.43512	9.25094	8.86882	0.240819	0	1.45197	8.18496	0.564265	up	3.85853	0.00470103	yes	chr9	77626464	77725461	+	4	circRNA	-	ENSSSCT00000016680	CDK14	mRNA	chr9:77587010-77626463|chr9:77725461-77788799	cyclin dependent kinase 14 [Source:HGNC Symbol;Acc:HGNC:8883]	GO:0005886(plasma membrane);GO:0005829(cytosol);GO:0005737(cytoplasm);GO:0005634(nucleus);GO:0000308(cytoplasmic cyclin-dependent protein kinase holoenzyme complex);GO:0060828(regulation of canonical Wnt signaling pathway);GO:0051726(regulation of cell cycle);GO:0006468(protein phosphorylation);GO:0000086(G2/M transition of mitotic cell cycle);GO:0030332(cyclin binding);GO:0005524(ATP binding);GO…	NA
circRNA4028	36.1128	47.3348	76.4557	0.758958	2.30753	4.74049	53.3011	2.60233	up	4.35629	0.0506868	no	chr9	77686339	77816417	+	4	circRNA	-	ENSSSCT00000016680	CDK14	mRNA	chr9:77643132-77686338|chr9:77816417-77859575	cyclin dependent kinase 14 [Source:HGNC Symbol;Acc:HGNC:8883]	GO:0005886(plasma membrane);GO:0005829(cytosol);GO:0005737(cytoplasm);GO:0005634(nucleus);GO:0000308(cytoplasmic cyclin-dependent protein kinase holoenzyme complex);GO:0060828(regulation of canonical Wnt signaling pathway);GO:0051726(regulation of cell cycle);GO:0006468(protein phosphorylation);GO:0000086(G2/M transition of mitotic cell cycle);GO:0030332(cyclin binding);GO:0005524(ATP binding);GO…	NA
circRNA4914	5.05064	2.07843	2.83001	0	2.48068	1.58225	3.31969	1.35431	up	1.29349	0.165539	no	chr9	77414305	77428858	+	2	circRNA	-	ENSSSCT00000016680	CDK14	mRNA	chr9:77278171-77414304|chr9:77428858-77469874	cyclin dependent kinase 14 [Source:HGNC Symbol;Acc:HGNC:8883]	GO:0005886(plasma membrane);GO:0005829(cytosol);GO:0005737(cytoplasm);GO:0005634(nucleus);GO:0000308(cytoplasmic cyclin-dependent protein kinase holoenzyme complex);GO:0060828(regulation of canonical Wnt signaling pathway);GO:0051726(regulation of cell cycle);GO:0006468(protein phosphorylation);GO:0000086(G2/M transition of mitotic cell cycle);GO:0030332(cyclin binding);GO:0005524(ATP binding);GO…	NA
circRNA1085	0.774137	2.05744	0.321392	0.917081	0.948953	0.405119	1.05099	0.757051	up	0.473287	0.636993	no	chr17	41844789	41850145	-	3	circRNA	-	ENSSSCT00000007949	CDK5RAP1	mRNA	chr17:41843521-41844788|chr17:41850145-41852653	CDK5 regulatory subunit associated protein 1 [Source:HGNC Symbol;Acc:HGNC:15880]	GO:0005739(mitochondrion);GO:0005737(cytoplasm);GO:0070900(mitochondrial tRNA modification);GO:0070131(positive regulation of mitochondrial translation);GO:0045903(positive regulation of translational fidelity);GO:0045736(negative regulation of cyclin-dependent protein serine/threonine kinase activity);GO:0043412(macromolecule modification);GO:0035600(tRNA methylthiolation);GO:0009451(RNA modific…	NA
circRNA3565	5.18673	2.00984	1.45184	0.984232	2.39033	2.8991	2.8828	2.09122	up	0.463126	0.585784	no	chr17	41840202	41846621	-	5	circRNA	-	ENSSSCT00000007949	CDK5RAP1	mRNA	chr17:41836886-41840201|chr17:41846621-41849934	CDK5 regulatory subunit associated protein 1 [Source:HGNC Symbol;Acc:HGNC:15880]	GO:0005739(mitochondrion);GO:0005737(cytoplasm);GO:0070900(mitochondrial tRNA modification);GO:0070131(positive regulation of mitochondrial translation);GO:0045903(positive regulation of translational fidelity);GO:0045736(negative regulation of cyclin-dependent protein serine/threonine kinase activity);GO:0043412(macromolecule modification);GO:0035600(tRNA methylthiolation);GO:0009451(RNA modific…	NA
circRNA4213	2.93268	3.4671	1.92786	1.36634	0.665331	1.82334	2.77588	1.285	up	1.11117	0.061895	no	chr17	41844789	41855385	-	6	circRNA	-	ENSSSCT00000007949	CDK5RAP1	mRNA	chr17:41843521-41844788|chr17:41855385-41858023	CDK5 regulatory subunit associated protein 1 [Source:HGNC Symbol;Acc:HGNC:15880]	GO:0005739(mitochondrion);GO:0005737(cytoplasm);GO:0070900(mitochondrial tRNA modification);GO:0070131(positive regulation of mitochondrial translation);GO:0045903(positive regulation of translational fidelity);GO:0045736(negative regulation of cyclin-dependent protein serine/threonine kinase activity);GO:0043412(macromolecule modification);GO:0035600(tRNA methylthiolation);GO:0009451(RNA modific…	NA
circRNA5207	0.912944	0.0879729	0	0	0.462563	0.605161	0.333639	0.355908	down	-0.093217	0.951954	no	chr17	41844789	41845019	-	1	circRNA	-	ENSSSCT00000007949	CDK5RAP1	mRNA	chr17:41843521-41844788|chr17:41845019-41846500	CDK5 regulatory subunit associated protein 1 [Source:HGNC Symbol;Acc:HGNC:15880]	GO:0005739(mitochondrion);GO:0005737(cytoplasm);GO:0070900(mitochondrial tRNA modification);GO:0070131(positive regulation of mitochondrial translation);GO:0045903(positive regulation of translational fidelity);GO:0045736(negative regulation of cyclin-dependent protein serine/threonine kinase activity);GO:0043412(macromolecule modification);GO:0035600(tRNA methylthiolation);GO:0009451(RNA modific…	NA
circRNA812	2.57923	0.584798	0	0	0	0	1.05468	0	up	Inf	0.309277	no	chr17	41854759	41855385	-	2	circRNA	-	ENSSSCT00000007949	CDK5RAP1	mRNA	chr17:41852754-41854758|chr17:41855385-41858023	CDK5 regulatory subunit associated protein 1 [Source:HGNC Symbol;Acc:HGNC:15880]	GO:0005739(mitochondrion);GO:0005737(cytoplasm);GO:0070900(mitochondrial tRNA modification);GO:0070131(positive regulation of mitochondrial translation);GO:0045903(positive regulation of translational fidelity);GO:0045736(negative regulation of cyclin-dependent protein serine/threonine kinase activity);GO:0043412(macromolecule modification);GO:0035600(tRNA methylthiolation);GO:0009451(RNA modific…	NA
circRNA2534	2.68405	0.923715	1.40125	0	0.647588	1.87281	1.66967	0.840134	up	0.990874	0.336575	no	chr16	51317149	51319525	+	3	circRNA	-	ENSSSCT00000018470	CDK7	mRNA	chr16:51313887-51317148|chr16:51319525-51322878	cyclin-dependent kinase 7 [Source:HGNC Symbol;Acc:HGNC:1778]	GO:0070985(TFIIK complex);GO:0042585(germinal vesicle);GO:0005737(cytoplasm);GO:0005675(holo TFIIH complex);GO:0005634(nucleus);GO:1904146(positive regulation of meiotic cell cycle process involved in oocyte maturation);GO:0045944(positive regulation of transcription from RNA polymerase II promoter);GO:0016310(phosphorylation);GO:0006468(protein phosphorylation);GO:0006366(transcription from RNA …	03022(Basal transcription factors);03420(Nucleotide excision repair);04110(Cell cycle)
circRNA2535	0.383436	1.09086	0.870341	0	0.138769	0.191103	0.781547	0.109957	up	2.82939	0.075678	no	chr16	51322879	51328861	+	3	circRNA	-	ENSSSCT00000018470	CDK7	mRNA	chr16:51319525-51322878|chr16:51328861-51329237	cyclin-dependent kinase 7 [Source:HGNC Symbol;Acc:HGNC:1778]	GO:0070985(TFIIK complex);GO:0042585(germinal vesicle);GO:0005737(cytoplasm);GO:0005675(holo TFIIH complex);GO:0005634(nucleus);GO:1904146(positive regulation of meiotic cell cycle process involved in oocyte maturation);GO:0045944(positive regulation of transcription from RNA polymerase II promoter);GO:0016310(phosphorylation);GO:0006468(protein phosphorylation);GO:0006366(transcription from RNA …	03022(Basal transcription factors);03420(Nucleotide excision repair);04110(Cell cycle)
circRNA2536	0.141537	0.863787	0.787104	0	0.179282	0	0.597476	0.0597607	up	3.32161	0.135812	no	chr16	51325829	51328861	+	2	circRNA	-	ENSSSCT00000018470	CDK7	mRNA	chr16:51322965-51325828|chr16:51328861-51329237	cyclin-dependent kinase 7 [Source:HGNC Symbol;Acc:HGNC:1778]	GO:0070985(TFIIK complex);GO:0042585(germinal vesicle);GO:0005737(cytoplasm);GO:0005675(holo TFIIH complex);GO:0005634(nucleus);GO:1904146(positive regulation of meiotic cell cycle process involved in oocyte maturation);GO:0045944(positive regulation of transcription from RNA polymerase II promoter);GO:0016310(phosphorylation);GO:0006468(protein phosphorylation);GO:0006366(transcription from RNA …	03022(Basal transcription factors);03420(Nucleotide excision repair);04110(Cell cycle)
circRNA5253	2.84652	2.87812	2.35186	0.909008	0.815186	2.05526	2.69217	1.25982	up	1.09555	0.0528964	no	chr16	51312835	51328861	+	8	circRNA	-	ENSSSCT00000018470	CDK7	mRNA	chr16:51311663-51312834|chr16:51328861-51329237	cyclin-dependent kinase 7 [Source:HGNC Symbol;Acc:HGNC:1778]	GO:0070985(TFIIK complex);GO:0042585(germinal vesicle);GO:0005737(cytoplasm);GO:0005675(holo TFIIH complex);GO:0005634(nucleus);GO:1904146(positive regulation of meiotic cell cycle process involved in oocyte maturation);GO:0045944(positive regulation of transcription from RNA polymerase II promoter);GO:0016310(phosphorylation);GO:0006468(protein phosphorylation);GO:0006366(transcription from RNA …	03022(Basal transcription factors);03420(Nucleotide excision repair);04110(Cell cycle)
circRNA1138	1.97709	0.211685	1.39617	0.336144	2.04058	2.60578	1.19498	1.66083	down	-0.474916	0.617694	no	chr7	16831954	16834199	+	2	circRNA	-	ENSSSCT00000001175	CDKAL1	mRNA	chr7:16820846-16831953|chr7:16834199-16923591	CDK5 regulatory subunit associated protein 1 like 1 [Source:HGNC Symbol;Acc:HGNC:21050]	GO:0016021(integral component of membrane);GO:0016020(membrane);GO:0005791(rough endoplasmic reticulum);GO:0005783(endoplasmic reticulum);GO:1990145(maintenance of translational fidelity);GO:0043412(macromolecule modification);GO:0035600(tRNA methylthiolation);GO:0009451(RNA modification);GO:0051539(4 iron, 4 sulfur cluster binding);GO:0051536(iron-sulfur cluster binding);GO:0035598(N6-threonylca…	NA
circRNA1139	42.5738	50.8316	47.648	0.926937	4.94155	5.48359	47.0178	3.78403	up	3.63521	0.000364201	yes	chr7	16831954	16923676	+	3	circRNA	-	ENSSSCT00000001175	CDKAL1	mRNA	chr7:16820846-16831953|chr7:16923676-16992241	CDK5 regulatory subunit associated protein 1 like 1 [Source:HGNC Symbol;Acc:HGNC:21050]	GO:0016021(integral component of membrane);GO:0016020(membrane);GO:0005791(rough endoplasmic reticulum);GO:0005783(endoplasmic reticulum);GO:1990145(maintenance of translational fidelity);GO:0043412(macromolecule modification);GO:0035600(tRNA methylthiolation);GO:0009451(RNA modification);GO:0051539(4 iron, 4 sulfur cluster binding);GO:0051536(iron-sulfur cluster binding);GO:0035598(N6-threonylca…	NA
circRNA1140	29.6535	29.6884	38.7285	6.03893	3.58814	2.02281	32.6901	3.88329	up	3.0735	0.00523593	yes	chr7	16992242	17106510	+	4	circRNA	-	ENSSSCT00000001175	CDKAL1	mRNA	chr7:16923676-16992241|chr7:17106510-17209020	CDK5 regulatory subunit associated protein 1 like 1 [Source:HGNC Symbol;Acc:HGNC:21050]	GO:0016021(integral component of membrane);GO:0016020(membrane);GO:0005791(rough endoplasmic reticulum);GO:0005783(endoplasmic reticulum);GO:1990145(maintenance of translational fidelity);GO:0043412(macromolecule modification);GO:0035600(tRNA methylthiolation);GO:0009451(RNA modification);GO:0051539(4 iron, 4 sulfur cluster binding);GO:0051536(iron-sulfur cluster binding);GO:0035598(N6-threonylca…	NA
circRNA3686	52.9537	50.1656	60.1853	7.85514	5.17467	5.13088	54.4349	6.05356	up	3.16867	0.0019759	yes	chr7	16923592	17106510	+	5	circRNA	-	ENSSSCT00000001175	CDKAL1	mRNA	chr7:16834199-16923591|chr7:17106510-17209020	CDK5 regulatory subunit associated protein 1 like 1 [Source:HGNC Symbol;Acc:HGNC:21050]	GO:0016021(integral component of membrane);GO:0016020(membrane);GO:0005791(rough endoplasmic reticulum);GO:0005783(endoplasmic reticulum);GO:1990145(maintenance of translational fidelity);GO:0043412(macromolecule modification);GO:0035600(tRNA methylthiolation);GO:0009451(RNA modification);GO:0051539(4 iron, 4 sulfur cluster binding);GO:0051536(iron-sulfur cluster binding);GO:0035598(N6-threonylca…	NA
circRNA4352	32.8676	34.1405	33.6571	3.19625	3.00769	1.7004	33.5551	2.63478	up	3.67078	1.52499e-06	yes	chr7	17037865	17106510	+	2	circRNA	-	ENSSSCT00000001175	CDKAL1	mRNA	chr7:17011103-17037864|chr7:17106510-17209020	CDK5 regulatory subunit associated protein 1 like 1 [Source:HGNC Symbol;Acc:HGNC:21050]	GO:0016021(integral component of membrane);GO:0016020(membrane);GO:0005791(rough endoplasmic reticulum);GO:0005783(endoplasmic reticulum);GO:1990145(maintenance of translational fidelity);GO:0043412(macromolecule modification);GO:0035600(tRNA methylthiolation);GO:0009451(RNA modification);GO:0051539(4 iron, 4 sulfur cluster binding);GO:0051536(iron-sulfur cluster binding);GO:0035598(N6-threonylca…	NA
circRNA4353	9.56754	6.23286	13.4289	0	0.981469	1.75514	9.74311	0.912203	up	3.41696	0.0444409	yes	chr7	17209021	17252211	+	2	circRNA	-	ENSSSCT00000001175	CDKAL1	mRNA	chr7:17106510-17209020|chr7:17252211-17311481	CDK5 regulatory subunit associated protein 1 like 1 [Source:HGNC Symbol;Acc:HGNC:21050]	GO:0016021(integral component of membrane);GO:0016020(membrane);GO:0005791(rough endoplasmic reticulum);GO:0005783(endoplasmic reticulum);GO:1990145(maintenance of translational fidelity);GO:0043412(macromolecule modification);GO:0035600(tRNA methylthiolation);GO:0009451(RNA modification);GO:0051539(4 iron, 4 sulfur cluster binding);GO:0051536(iron-sulfur cluster binding);GO:0035598(N6-threonylca…	NA
circRNA4354	33.2781	21.7511	26.9705	0	2.28735	1.68	27.3332	1.32245	up	4.36937	0.0132171	yes	chr7	17252066	17311662	+	2	circRNA	-	ENSSSCT00000001175	CDKAL1	mRNA	chr7:17209187-17252065|chr7:17311662-17354063	CDK5 regulatory subunit associated protein 1 like 1 [Source:HGNC Symbol;Acc:HGNC:21050]	GO:0016021(integral component of membrane);GO:0016020(membrane);GO:0005791(rough endoplasmic reticulum);GO:0005783(endoplasmic reticulum);GO:1990145(maintenance of translational fidelity);GO:0043412(macromolecule modification);GO:0035600(tRNA methylthiolation);GO:0009451(RNA modification);GO:0051539(4 iron, 4 sulfur cluster binding);GO:0051536(iron-sulfur cluster binding);GO:0035598(N6-threonylca…	NA
circRNA6409	52.5961	50.9749	68.7069	0	2.31074	1.31741	57.426	1.20938	up	5.56936	0.00923369	yes	chr7	17106407	17252211	+	3	circRNA	-	ENSSSCT00000001175	CDKAL1	mRNA	chr7:17037985-17106406|chr7:17252211-17311481	CDK5 regulatory subunit associated protein 1 like 1 [Source:HGNC Symbol;Acc:HGNC:21050]	GO:0016021(integral component of membrane);GO:0016020(membrane);GO:0005791(rough endoplasmic reticulum);GO:0005783(endoplasmic reticulum);GO:1990145(maintenance of translational fidelity);GO:0043412(macromolecule modification);GO:0035600(tRNA methylthiolation);GO:0009451(RNA modification);GO:0051539(4 iron, 4 sulfur cluster binding);GO:0051536(iron-sulfur cluster binding);GO:0035598(N6-threonylca…	NA
circRNA1569	0.0910972	0	0.0217115	0	0	1.3984	0.0376029	0.466133	down	-3.63182	0.455063	no	chr8	143484196	143500629	-	4	circRNA	-	ENSSSCT00000010110	CDS1	mRNA	chr8:143463740-143484195|chr8:143500629-143519092	CDP-diacylglycerol synthase 1 [Source:HGNC Symbol;Acc:HGNC:1800]	GO:0016021(integral component of membrane);GO:0016020(membrane);GO:0005789(endoplasmic reticulum membrane);GO:0005783(endoplasmic reticulum);GO:0016024(CDP-diacylglycerol biosynthetic process);GO:0006661(phosphatidylinositol biosynthetic process);GO:0006655(phosphatidylglycerol biosynthetic process);GO:0016779(nucleotidyltransferase activity);GO:0016772(transferase activity, transferring phosphor…	00564(Glycerophospholipid metabolism);04070(Phosphatidylinositol signaling system)
circRNA3442	0	0	0.0300073	0	0	0.614954	0.0100024	0.204985	down	-4.35709	0.441944	no	chr8	143484196	143494700	-	3	circRNA	-	ENSSSCT00000010110	CDS1	mRNA	chr8:143463740-143484195|chr8:143494700-143500501	CDP-diacylglycerol synthase 1 [Source:HGNC Symbol;Acc:HGNC:1800]	GO:0016021(integral component of membrane);GO:0016020(membrane);GO:0005789(endoplasmic reticulum membrane);GO:0005783(endoplasmic reticulum);GO:0016024(CDP-diacylglycerol biosynthetic process);GO:0006661(phosphatidylinositol biosynthetic process);GO:0006655(phosphatidylglycerol biosynthetic process);GO:0016779(nucleotidyltransferase activity);GO:0016772(transferase activity, transferring phosphor…	00564(Glycerophospholipid metabolism);04070(Phosphatidylinositol signaling system)
circRNA3559	2.37145	1.59146	3.14896	5.7208	0.670508	0.531866	2.37062	2.30773	up	0.0387948	0.974459	no	chr17	15185053	15188123	+	3	circRNA	-	ENSSSCT00000023936	CDS2	mRNA	chr17:15142093-15185052|chr17:15188123-15191245	CDP-diacylglycerol synthase 2 [Source:HGNC Symbol;Acc:HGNC:1801]	GO:0016021(integral component of membrane);GO:0016020(membrane);GO:0005789(endoplasmic reticulum membrane);GO:0005783(endoplasmic reticulum);GO:0016024(CDP-diacylglycerol biosynthetic process);GO:0006655(phosphatidylglycerol biosynthetic process);GO:0016779(nucleotidyltransferase activity);GO:0016772(transferase activity, transferring phosphorus-containing groups);GO:0016740(transferase activity)…	00564(Glycerophospholipid metabolism);04070(Phosphatidylinositol signaling system)
circRNA5729	3.75526	4.36884	3.79832	4.30965	1.58074	1.27018	3.97414	2.38686	up	0.735531	0.23903	no	chr17	15185053	15193949	+	6	circRNA	-	ENSSSCT00000023936	CDS2	mRNA	chr17:15142093-15185052|chr17:15193949-15197429	CDP-diacylglycerol synthase 2 [Source:HGNC Symbol;Acc:HGNC:1801]	GO:0016021(integral component of membrane);GO:0016020(membrane);GO:0005789(endoplasmic reticulum membrane);GO:0005783(endoplasmic reticulum);GO:0016024(CDP-diacylglycerol biosynthetic process);GO:0006655(phosphatidylglycerol biosynthetic process);GO:0016779(nucleotidyltransferase activity);GO:0016772(transferase activity, transferring phosphorus-containing groups);GO:0016740(transferase activity)…	00564(Glycerophospholipid metabolism);04070(Phosphatidylinositol signaling system)
circRNA6875	6.7235	7.85963	7.5656	10.2078	9.05947	9.93388	7.38291	9.73371	down	-0.398801	0.00840022	no	chr17	15185053	15203012	+	11	circRNA	-	ENSSSCT00000023936	CDS2	mRNA	chr17:15142093-15185052|chr17:15203012-15203404	CDP-diacylglycerol synthase 2 [Source:HGNC Symbol;Acc:HGNC:1801]	GO:0016021(integral component of membrane);GO:0016020(membrane);GO:0005789(endoplasmic reticulum membrane);GO:0005783(endoplasmic reticulum);GO:0016024(CDP-diacylglycerol biosynthetic process);GO:0006655(phosphatidylglycerol biosynthetic process);GO:0016779(nucleotidyltransferase activity);GO:0016772(transferase activity, transferring phosphorus-containing groups);GO:0016740(transferase activity)…	00564(Glycerophospholipid metabolism);04070(Phosphatidylinositol signaling system)
circRNA5415	1.75449	0.135253	2.27476	6.94947	0.533371	0.734524	1.38817	2.73912	down	-0.98053	0.593319	no	chrX	90734715	90740510	-	4	circRNA	-	ENSSSCT00000013658	CENPI	mRNA	chrX:90723706-90734714|chrX:90740510-90742472	centromere protein I [Source:HGNC Symbol;Acc:HGNC:3968]	GO:0016604(nuclear body);GO:0005829(cytosol);GO:0000776(kinetochore);GO:0034508(centromere complex assembly)	NA
circRNA543	2.32477	0	0.42215	0	0.0701129	1.69937	0.915641	0.589826	up	0.634491	0.738161	no	chrX	90715380	90717029	-	3	circRNA	-	ENSSSCT00000032805	CENPI	mRNA	chrX:90713565-90715379|chrX:90717029-90717614	centromere protein I [Source:HGNC Symbol;Acc:HGNC:3968]	GO:0016604(nuclear body);GO:0005829(cytosol);GO:0000776(kinetochore);GO:0034508(centromere complex assembly)	NA
circRNA4900	4.10825	2.90311	2.69806	2.87375	3.06448	0.955517	3.23647	2.29791	up	0.494096	0.317688	no	chr9	49790828	49792507	+	2	circRNA	-	ENSSSCT00000016446	CEP164	mRNA	chr9:49782522-49790827|chr9:49792507-49794812	centrosomal protein 164 [Source:HGNC Symbol;Acc:HGNC:29182]	GO:0097539(ciliary transition fiber);GO:0016607(nuclear speck);GO:0005814(centriole);GO:0005813(centrosome);GO:0005654(nucleoplasm);GO:0005615(extracellular space);GO:0060271(cilium assembly)	NA
circRNA4901	6.20265	3.0549	8.01567	0	3.23001	0.961763	5.75774	1.39726	up	2.04291	0.0756176	no	chr9	49818338	49818936	+	2	circRNA	-	ENSSSCT00000016446	CEP164	mRNA	chr9:49818047-49818337|chr9:49818936-49819241	centrosomal protein 164 [Source:HGNC Symbol;Acc:HGNC:29182]	GO:0097539(ciliary transition fiber);GO:0016607(nuclear speck);GO:0005814(centriole);GO:0005813(centrosome);GO:0005654(nucleoplasm);GO:0005615(extracellular space);GO:0060271(cilium assembly)	NA
circRNA1192	0	0	0	4.00039	0	0.851279	0	1.61722	down	-Inf	0.315125	no	chr6	89927175	89927815	-	2	circRNA	-	ENSSSCT00000004070	CEP192	mRNA	chr6:89924954-89927174|chr6:89927815-89932620	centrosomal protein 192 [Source:HGNC Symbol;Acc:HGNC:25515]	GO:0005829(cytosol);GO:0005813(centrosome);GO:0005737(cytoplasm);GO:0000242(pericentriolar material);GO:0051298(centrosome duplication);GO:0051225(spindle assembly);GO:0010923(negative regulation of phosphatase activity);GO:0019902(phosphatase binding)	03013(RNA transport)
circRNA3113	0	0.587333	0.232426	0	2.77939	0	0.273253	0.926463	down	-1.7615	0.555768	no	chr6	89982227	89982572	-	1	circRNA	-	ENSSSCT00000004070	CEP192	mRNA	chr6:89981781-89982226|chr6:89982572-89994038	centrosomal protein 192 [Source:HGNC Symbol;Acc:HGNC:25515]	GO:0005829(cytosol);GO:0005813(centrosome);GO:0005737(cytoplasm);GO:0000242(pericentriolar material);GO:0051298(centrosome duplication);GO:0051225(spindle assembly);GO:0010923(negative regulation of phosphatase activity);GO:0019902(phosphatase binding)	03013(RNA transport)
circRNA4448	0.645582	0	1.74379	0	0.477018	0.675687	0.796457	0.384235	up	1.05161	0.513356	no	chr6	89994039	89995947	-	3	circRNA	-	ENSSSCT00000004070	CEP192	mRNA	chr6:89982572-89994038|chr6:89995947-89997948	centrosomal protein 192 [Source:HGNC Symbol;Acc:HGNC:25515]	GO:0005829(cytosol);GO:0005813(centrosome);GO:0005737(cytoplasm);GO:0000242(pericentriolar material);GO:0051298(centrosome duplication);GO:0051225(spindle assembly);GO:0010923(negative regulation of phosphatase activity);GO:0019902(phosphatase binding)	03013(RNA transport)
circRNA2374	1.10995	0	0.325585	0	0.702974	0.834047	0.478511	0.51234	down	-0.0985508	0.939734	no	chr13	83142279	83143459	+	2	circRNA	-	ENSSSCT00000012746	CEP63	mRNA	None|chr13:83143459-83171323	centrosomal protein 63 [Source:HGNC Symbol;Acc:HGNC:25815]	GO:0005814(centriole);GO:0005813(centrosome);GO:0098535(de novo centriole assembly involved in multi-ciliated epithelial cell differentiation);GO:0007099(centriole replication)	NA
circRNA5665	5.49041	8.19877	11.023	2.19371	0.29937	0.608895	8.2374	1.03399	up	2.99396	0.0335789	yes	chr13	83142279	83179748	+	5	circRNA	-	ENSSSCT00000012746	CEP63	mRNA	None|chr13:83179748-83200605	centrosomal protein 63 [Source:HGNC Symbol;Acc:HGNC:25815]	GO:0005814(centriole);GO:0005813(centrosome);GO:0098535(de novo centriole assembly involved in multi-ciliated epithelial cell differentiation);GO:0007099(centriole replication)	NA
circRNA1038	0.297028	0.858665	1.84059	0	3.2921	0	0.99876	1.09737	down	-0.135835	0.939621	no	chr13	86954020	86954463	-	2	circRNA	-	ENSSSCT00000023265	CEP70	mRNA	chr13:86952927-86954019|chr13:86954463-86954634	centrosomal protein 70 [Source:HGNC Symbol;Acc:HGNC:29972]	GO:0005813(centrosome);GO:0042802(identical protein binding)	NA
circRNA6185	0.158863	1.53083	2.04456	0	1.66013	0.0554236	1.24475	0.571852	up	1.12214	0.438644	no	chr13	86999951	87003242	-	4	circRNA	-	ENSSSCT00000023265	CEP70	mRNA	chr13:86990937-86999950|chr13:87003242-87029122	centrosomal protein 70 [Source:HGNC Symbol;Acc:HGNC:29972]	GO:0005813(centrosome);GO:0042802(identical protein binding)	NA
circRNA1757	3.02003	1.13447	0.0975965	3.05466	0.0972561	0.714319	1.41736	1.28875	up	0.137241	0.922531	no	chr15	116124302	116124713	+	1	circRNA	-	ENSSSCT00000017531	CFLAR	mRNA	chr15:116106507-116124301|chr15:116124713-116156474	CASP8 and FADD like apoptosis regulator [Source:HGNC Symbol;Acc:HGNC:1876]	GO:0042981(regulation of apoptotic process);GO:0006508(proteolysis);GO:0008234(cysteine-type peptidase activity);GO:0004197(cysteine-type endopeptidase activity);GO:0097342(ripoptosome);GO:0031264(death-inducing signaling complex);GO:0005737(cytoplasm);GO:2001237(negative regulation of extrinsic apoptotic signaling pathway);GO:1902042(negative regulation of extrinsic apoptotic signaling pathway v…	04064(NF-kappa B signaling pathway);04668(TNF signaling pathway);04210(Apoptosis);05142(Chagas disease (American trypanosomiasis))
[truncated: 4,624 more rows]

## Sheet: host genes in oocyte
Supplementary Table 4. List of host genes producing multiple circRNAs in oocytes.
Accession	MII_oocyte1_fpkm	MII_oocyte2_fpkm	MII_oocyte3_fpkm	GV_oocyte1_fpkm	GV_oocyte2_fpkm	GV_oocyte3_fpkm	mean_fpkm_MII_oocyte	mean_fpkm_GV_oocyte	regulation	log2fold_change	pvalue	significant	chr	start	end	strand	exon Count	circType	circRNA category	isoformName	geneName	hosting gene type	flankIntron	gene Discription	GO	KEGG
[truncated: 252 more rows]
