# Supplementary material for: Circular RNA profiling in the oocyte and cumulus cells reveals that circARMC4 is essential for porcine oocyte maturation
Source: Aging (Albany NY). 2019 Sep 28;11(18):8015–34. doi: 10.18632/aging.102315 (PMC6781969; doi:10.18632/aging.102315)
Supplement: Supplementary Table 5 [file aging-11-102315-s004.xlsx]

## Sheet: host genes in cumulus cell
Supplementary Table 5. List of DECs and their host genes in cumulus cells.
Accession	Regulation	Log2fold_change	Pvalue	Significant	Chromosome	Start	End	CircType	GeneName	Hosting GeneType
circRNA1686	up	4.47741	1.51712e-08	yes	chr10	24480147	24493093	circRNA	TP53BP2	mRNA
circRNA4352	up	3.67078	1.52499e-06	yes	chr7	17037865	17106510	circRNA	CDKAL1	mRNA
circRNA5705	down	-4.12586	3.18971e-06	yes	chr11	5189667	5190604	circRNA	PAN3	mRNA
ciRNA215	up	4.79451	4.22867e-06	yes	chr13	138784782	138907624	ciRNA	FGF12	mRNA
ciRNA99	up	4.79451	4.22867e-06	yes	chr13	138784781	138907624	ciRNA	FGF12	mRNA
circRNA2869	up	4.10932	4.34152e-06	yes	chr18	17099495	17186949	circRNA	CHCHD3	mRNA
circRNA6485	up	4.57724	4.74261e-06	yes	chr6	148475642	148486340	circRNA	EPS15	mRNA
circRNA137	up	1.04985	9.44217e-06	yes	chr3	39564463	39600713	circRNA	CREBBP	mRNA
circRNA238	up	4.46221	1.12755e-05	yes	chr1	205472022	205474960	circRNA	KTN1	mRNA
circRNA3911	up	4.86234	1.48937e-05	yes	chr1	35919007	35978443	circRNA	ENSSSCG00000004199	mRNA
circRNA3520	up	2.31625	1.95015e-05	yes	chr11	5274152	5295233	circRNA	PAN3	mRNA
circRNA5248	up	4.3935	1.95351e-05	yes	chr16	37500291	37507694	circRNA	IL6ST	mRNA
circRNA665	up	2.36418	2.49255e-05	yes	chr2	93851810	93868582	circRNA	VCAN	mRNA
circRNA354	up	3.36535	2.53959e-05	yes	chr13	119231761	119243520	circRNA	PLD1	mRNA
circRNA3989	up	4.10472	2.98005e-05	yes	chr18	17302562	17345467	circRNA	CHCHD3	mRNA
circRNA2240	up	4.78901	3.05632e-05	yes	chr9	11319664	11391169	circRNA	UVRAG	mRNA
circRNA1754	up	2.4913	3.12972e-05	yes	chr15	101692913	101704462	circRNA	ITGAV	mRNA
circRNA6180	up	3.24115	3.54932e-05	yes	chr13	53693156	53892856	circRNA	SUCLG2	mRNA
circRNA2921	up	2.81462	3.70532e-05	yes	chr13	15488018	15524529	circRNA	SLC4A7	mRNA
circRNA2761	up	1.35992	4.38169e-05	yes	chr3	18514766	18521420	circRNA	MVP	mRNA
circRNA4106	up	1.04224	4.64716e-05	yes	chr13	98146479	98191973	circRNA	RNF13	mRNA
circRNA84	up	2.76007	4.77955e-05	yes	chr5	89455612	89471342	circRNA	ENSSSCG00000000884	mRNA
circRNA1249	up	2.48968	5.32631e-05	yes	chr4	2565801	2609139	circRNA	TRAPPC9	mRNA
circRNA2487	up	1.36589	5.4613e-05	yes	chr10	29340480	29360371	circRNA	KDM5B	mRNA
circRNA526	up	3.07768	5.50158e-05	yes	chr14	132243465	132245621	circRNA	PDCD4	mRNA
circRNA5858	up	2.79982	5.8706e-05	yes	chr6	99131708	99161430	circRNA	GREB1L	mRNA
circRNA5260	up	2.05377	5.91124e-05	yes	chr15	20051917	20062782	circRNA	MGAT5	mRNA
circRNA263	up	2.31051	6.0941e-05	yes	chr18	18661914	18715721	circRNA	MKLN1	mRNA
circRNA809	down	-1.86845	6.38149e-05	yes	chr17	28264912	28268431	circRNA	ENSSSCG00000007080	mRNA
circRNA3798	up	2.25068	6.68375e-05	yes	chr4	42001869	42030271	circRNA	LAPTM4B	mRNA
circRNA5065	up	2.38448	7.53533e-05	yes	chr13	119202413	119216757	circRNA	PLD1	mRNA
circRNA3642	up	2.77863	7.72192e-05	yes	chr14	65050403	65075757	circRNA	URB2	mRNA
circRNA5897	up	3.29602	7.86177e-05	yes	chr5	50804774	50832839	circRNA	ENSSSCG00000000555	mRNA
circRNA6464	up	1.13325	7.98487e-05	yes	chr6	71876951	71893662	circRNA	CAPZB	mRNA
circRNA1068	up	3.97563	8.15523e-05	yes	chr11	52212325	52216641	circRNA	ENSSSCG00000009464	mRNA
circRNA3310	up	1.64037	8.89854e-05	yes	chr1	161713076	161765610	circRNA	ENSSSCG00000004857	mRNA
circRNA419	up	3.35962	9.2188e-05	yes	chr10	24477301	24479547	circRNA	TP53BP2	mRNA
circRNA5943	up	3.97136	9.23435e-05	yes	chr4	129295358	129336726	circRNA	CDC14A	mRNA
circRNA3047	up	3.65335	0.000103513	yes	chr14	83832559	83848192	circRNA	SAMD8	mRNA
circRNA3132	up	2.61645	0.000107996	yes	chr6	148116282	148135855	circRNA	OSBPL9	mRNA
circRNA3799	up	2.43944	0.000112283	yes	chr4	42011532	42030271	circRNA	LAPTM4B	mRNA
circRNA6529	up	2.88796	0.000115077	yes	chr4	79034573	79039936	circRNA	CHD7	mRNA
circRNA713	up	2.64779	0.000119213	yes	chr18	21597334	21629092	circRNA	ENSSSCG00000016590	mRNA
circRNA6192	up	2.47716	0.000123554	yes	chr13	119202413	119214179	circRNA	PLD1	mRNA
circRNA189	up	2.20938	0.000125633	yes	chr2	93851810	93857047	circRNA	VCAN	mRNA
circRNA56	up	2.76547	0.000129744	yes	chr6	148118708	148135855	circRNA	OSBPL9	mRNA
circRNA5073	up	2.77413	0.000133412	yes	chr13	132989309	132997449	circRNA	SENP2	mRNA
circRNA3225	up	2.29136	0.000138778	yes	chr3	113999359	114016670	circRNA	BIRC6	mRNA
circRNA2736	down	-1.18946	0.000143341	yes	chr5	64627708	64628987	circRNA	GABARAPL1	mRNA
circRNA3003	up	6.28006	0.000148768	yes	chr16	52464865	52467780	circRNA	MAP1B	mRNA
circRNA550	up	3.08111	0.000152269	yes	chrX	144149375	144149638	circRNA	PRKX	mRNA
circRNA4556	up	1.51575	0.000153299	yes	chr4	74140982	74204622	circRNA	ENSSSCG00000023518	mRNA
circRNA4778	up	1.8642	0.000154646	yes	chr1	161725478	161781848	circRNA	ENSSSCG00000004857	mRNA
circRNA4677	up	3.18978	0.000177725	yes	chr2	52875658	52916460	circRNA	ENSSSCG00000013409	mRNA
circRNA6638	down	-1.95749	0.000185402	yes	chr1	64163450	64171637	circRNA	RRAGD	mRNA
circRNA731	up	3.45703	0.000192107	yes	chr9	137404494	137433718	circRNA	RGL1	mRNA
circRNA4983	up	3.15409	0.000196517	yes	chr8	80764338	80786409	circRNA	ARFIP1	mRNA
circRNA2978	down	-1.22106	0.000198761	yes	chr10	48232668	48234172	circRNA	VIM	mRNA
circRNA2531	up	5.65951	0.000200079	yes	chr16	34221766	34224927	circRNA	ITGA2	mRNA
circRNA2670	up	2.76319	0.00020009	yes	chrX	51839891	51852729	circRNA	HUWE1	mRNA
circRNA2074	up	2.07314	0.000203427	yes	chr3	130810562	130810757	circRNA	ENSSSCG00000008621	mRNA
circRNA2634	up	8.2278	0.000211352	yes	chr14	106458147	106591445	circRNA	PRKG1	mRNA
circRNA853	up	3.88371	0.000220138	yes	chr14	118528653	118537587	circRNA	ENSSSCG00000010525	mRNA
circRNA525	up	3.03209	0.000226057	yes	chr14	132243465	132247290	circRNA	PDCD4	mRNA
circRNA1145	up	1.79945	0.000246635	yes	chr7	32849470	32966736	circRNA	ENSSSCG00000001493	mRNA
circRNA820	up	2.51736	0.000251497	yes	chr16	43281944	43291143	circRNA	ZSWIM6	mRNA
circRNA6581	up	3.18668	0.000253649	yes	chr3	101078333	101203581	circRNA	SRBD1	mRNA
circRNA1108	up	2.34724	0.000269121	yes	chr14	10500874	10509224	circRNA	DOCK5	mRNA
circRNA2990	up	1.84714	0.000282527	yes	chr17	44840385	44865386	circRNA	EPB41L1	mRNA
circRNA64	down	-1.20216	0.000291978	yes	chr5	3457119	3462302	circRNA	ARFGAP3	mRNA
circRNA1945	up	3.58096	0.000292637	yes	chr5	17173290	17174711	circRNA	DIP2B	mRNA
circRNA1568	up	5.32887	0.000294905	yes	chr8	133985141	134040905	circRNA	BMPR1B	mRNA
circRNA2083	up	1.97859	0.000295321	yes	chr2	4159831	4173034	circRNA	ENSSSCG00000021760	mRNA
circRNA4261	up	1.80044	0.000298982	yes	chr15	88505944	88605731	circRNA	MAP3K20	mRNA
circRNA4044	up	1.73625	0.000308159	yes	chr9	144068891	144093904	circRNA	PPP2R5A	mRNA
circRNA792	up	1.07321	0.00031316	yes	chr11	76642102	76698938	circRNA	TMTC4	mRNA
circRNA4539	up	3.26135	0.000331597	yes	chr4	30725072	30748119	circRNA	ENSSSCG00000006029	mRNA
circRNA6556	up	1.40203	0.000331855	yes	chr3	39564463	39622856	circRNA	CREBBP	mRNA
circRNA1248	up	2.00334	0.000346733	yes	chr4	2565801	2631285	circRNA	TRAPPC9	mRNA
circRNA3199	up	2.77012	0.000347822	yes	chr3	10482501	10492534	circRNA	BAZ1B	mRNA
circRNA1139	up	3.63521	0.000364201	yes	chr7	16831954	16923676	circRNA	CDKAL1	mRNA
circRNA2782	up	3.4855	0.000384631	yes	chr3	102690151	102711553	circRNA	LRPPRC	mRNA
circRNA6812	up	3.31654	0.00038695	yes	chr12	15502922	15519163	circRNA	TANC2	mRNA
circRNA2808	up	1.81962	0.000387094	yes	chr2	93802209	93802586	circRNA	VCAN	mRNA
circRNA1614	up	3.03462	0.000393626	yes	chr13	119154837	119186715	circRNA	PLD1	mRNA
circRNA6342	up	2.69707	0.000398299	yes	chr14	10560416	10564953	circRNA	DOCK5	mRNA
circRNA153	up	3.07427	0.000400206	yes	chr3	90750338	90758415	circRNA	MTIF2	mRNA
circRNA936	up	3.818	0.000405125	yes	chr3	61505088	61506064	circRNA	PTCD3	mRNA
circRNA2547	up	5.70508	0.000412048	yes	chr15	20073032	20119991	circRNA	MGAT5	mRNA
circRNA3913	up	3.19299	0.000414379	yes	chr1	38402899	38581068	circRNA	PTPRK	mRNA
circRNA89	up	3.18755	0.00042222	yes	chr5	92377208	92403021	circRNA	FGD6	mRNA
circRNA1718	up	2.28129	0.000423955	yes	chr17	57028111	57046105	circRNA	ARFGEF2	mRNA
circRNA3590	up	1.59859	0.000429093	yes	chr15	34770888	34820906	circRNA	ENSSSCG00000027791	mRNA
circRNA6574	up	3.77404	0.000433061	yes	chr3	81761613	81772845	circRNA	ENSSSCG00000027509	mRNA
circRNA2108	up	2.47972	0.000434244	yes	chr2	81132642	81150704	circRNA	ZFP2	mRNA
circRNA159	up	3.68521	0.00045761	yes	chr3	113310620	113316934	circRNA	LTBP1	mRNA
ciRNA201	down	-2.22656	0.00046286	yes	chr2	9251567	9251773	ciRNA	FADS1	mRNA
ciRNA236	down	-2.22656	0.00046286	yes	chr2	9251569	9251773	ciRNA	FADS1	mRNA
circRNA29	up	2.09758	0.00046636	yes	chr7	128873317	128881993	circRNA	CDC42BPB	mRNA
circRNA5866	down	-1.53783	0.000469557	yes	chr6	112321758	112329035	circRNA	RPRD1A	mRNA
circRNA3415	up	1.26779	0.0004818	yes	chr8	1536263	1541938	circRNA	HTT	mRNA
circRNA4458	up	2.42171	0.000482283	yes	chr6	99462851	99492482	circRNA	MIB1	mRNA
circRNA2298	up	1.77363	0.000483918	yes	chr8	3290947	3351783	circRNA	TBC1D14	mRNA
circRNA795	up	1.58149	0.000490747	yes	chr10	7639179	7656478	circRNA	ENSSSCG00000010811	mRNA
circRNA3844	up	2.68751	0.000498608	yes	chr3	62629921	62650638	circRNA	KCMF1	mRNA
ciRNA12	down	-2.22486	0.000504106	yes	chr2	9251570	9251773	ciRNA	FADS1	mRNA
circRNA909	up	2.36521	0.000510128	yes	chr4	2565801	2579021	circRNA	TRAPPC9	mRNA
circRNA6056	up	3.00021	0.000512539	yes	chr1	152305080	152326850	circRNA	AQR	mRNA
circRNA1969	up	2.03975	0.000513123	yes	chr5	89495676	89552133	circRNA	ENSSSCG00000000884	mRNA
circRNA3202	up	2.7194	0.000521418	yes	chr3	18802489	18802853	circRNA	NFATC2IP	mRNA
circRNA4381	up	1.01799	0.000528216	yes	chr7	62804938	62830084	circRNA	PTPN9	mRNA
circRNA521	up	4.25133	0.000528664	yes	chr14	92407605	92425347	circRNA	CCSER2	mRNA
circRNA1802	up	2.05843	0.000529238	yes	chr14	81015098	81039544	circRNA	ENSSSCG00000023130	mRNA
circRNA4015	up	3.20662	0.000534075	yes	chr9	40775540	40785836	circRNA	ENSSSCG00000025606	mRNA
circRNA4507	up	2.91848	0.000536273	yes	chr5	63272510	63286407	circRNA	ETV6	mRNA
circRNA6646	down	-1.39938	0.000542081	yes	chr1	110532620	110548336	circRNA	SMAD4	mRNA
circRNA1058	up	4.81282	0.00055563	yes	chr12	37773621	37779098	circRNA	INTS2	mRNA
circRNA6903	up	1.19127	0.000556478	yes	chr15	71715508	71727032	circRNA	ACVR1	mRNA
circRNA2876	up	2.16716	0.000566717	yes	chr9	14515834	14551302	circRNA	ENSSSCG00000014894	mRNA
circRNA496	up	2.47642	0.000591027	yes	chr14	10546491	10550668	circRNA	DOCK5	mRNA
circRNA3647	up	2.27727	0.000599176	yes	chr14	81015098	81031799	circRNA	ENSSSCG00000023130	mRNA
circRNA4483	up	3.93579	0.000611144	yes	chr6	153813301	153851306	circRNA	EIF2B3	mRNA
circRNA2613	up	2.17742	0.000617622	yes	chr14	37551911	37562245	circRNA	FBXO21	mRNA
circRNA1220	up	3.55379	0.000624708	yes	chr5	23963982	23964620	circRNA	ENSSSCG00000026524	mRNA
circRNA5531	down	-2.73379	0.000626328	yes	chr3	110306538	110317020	circRNA	CRIM1	mRNA
circRNA6766	up	2.0482	0.000633232	yes	chr8	146890664	146941701	circRNA	ANTXR2	mRNA
circRNA5331	up	1.47927	0.000639011	yes	chr14	33695132	33709102	circRNA	ANAPC7	mRNA
circRNA6543	up	3.72056	0.000645049	yes	chr4	136071929	136102022	circRNA	ENSSSCG00000006901	mRNA
circRNA5870	up	2.01108	0.000651598	yes	chr6	138053763	138070968	circRNA	ENSSSCG00000003818	mRNA
circRNA3534	up	2.11924	0.000652184	yes	chr10	7761050	7772799	circRNA	ENSSSCG00000028407	mRNA
circRNA5130	down	-1.92005	0.000662442	yes	chr12	62856482	62863000	circRNA	ENSSSCG00000018049	mRNA
circRNA608	up	4.67998	0.000681791	yes	chr4	36460869	36467624	circRNA	DCAF13	mRNA
circRNA6270	up	1.40461	0.000694368	yes	chr10	71751709	71752815	circRNA	ENSSSCG00000028982	mRNA
circRNA6271	up	1.40461	0.000694368	yes	chr10	72013472	72014578	circRNA	ENSSSCG00000025277	mRNA
circRNA182	up	6.26913	0.000699083	yes	chr2	70412158	70415224	circRNA	PLPPR2	mRNA
circRNA1246	up	3.67962	0.000699673	yes	chr5	105296613	105332428	circRNA	ACSS3	mRNA
circRNA442	up	1.89817	0.000710094	yes	chr17	36500876	36516369	circRNA	ATRN	mRNA
circRNA1098	up	1.60356	0.000712545	yes	chr15	71703524	71709108	circRNA	ACVR1	mRNA
circRNA2431	up	3.89618	0.000715422	yes	chr12	37773621	37784033	circRNA	INTS2	mRNA
circRNA2627	up	3.95928	0.00072269	yes	chr14	83832559	83851733	circRNA	SAMD8	mRNA
circRNA3203	up	3.53412	0.000723443	yes	chr3	30119792	30179656	circRNA	ENSSSCG00000023626	mRNA
circRNA1458	up	3.53496	0.000725193	yes	chr1	305805422	305871131	circRNA	MED27	mRNA
circRNA6449	down	-1.4737	0.00073403	yes	chr6	32894994	32905961	circRNA	GPT2	mRNA
circRNA6151	up	2.37047	0.000739598	yes	chr8	58349146	58366177	circRNA	EXOC1	mRNA
circRNA457	up	3.08463	0.000744387	yes	chr16	37507535	37511757	circRNA	IL6ST	mRNA
circRNA4857	up	3.42415	0.000749764	yes	chr18	21597334	21613558	circRNA	ENSSSCG00000016590	mRNA
circRNA5520	up	1.61899	0.000749903	yes	chr3	61090978	61098022	circRNA	KDM3A	mRNA
circRNA2522	up	3.24864	0.000751332	yes	chr17	43073836	43079731	circRNA	ITCH	mRNA
circRNA2483	up	2.91339	0.000756725	yes	chr10	18101700	18187909	circRNA	AKT3	mRNA
circRNA6662	up	1.55678	0.000758479	yes	chr1	161725478	161765610	circRNA	ENSSSCG00000004857	mRNA
circRNA5552	up	2.12689	0.000775562	yes	chr2	60043010	60047935	circRNA	ENSSSCG00000013870	mRNA
circRNA6284	up	2.16916	0.000787303	yes	chr16	3973714	3991249	circRNA	ENSSSCG00000029792	mRNA
circRNA6853	up	2.26208	0.000794073	yes	chr11	84979278	84982768	circRNA	ENSSSCG00000009551	mRNA
circRNA518	up	3.24913	0.000799478	yes	chr14	78059545	78063812	circRNA	DDX21	mRNA
circRNA6526	up	3.86753	0.000800826	yes	chr4	53450096	53515135	circRNA	MMP16	mRNA
circRNA3364	up	4.33914	0.000807222	yes	chr18	42654420	42683101	circRNA	DPY19L1	mRNA
circRNA2389	up	2.94277	0.000815996	yes	chr13	132989309	132999736	circRNA	SENP2	mRNA
circRNA63	down	-1.84239	0.000835586	yes	chr5	3457119	3458242	circRNA	ARFGAP3	mRNA
circRNA4348	up	2.26499	0.000841927	yes	chr7	103694	117119	circRNA	EXOC2	mRNA
circRNA1696	up	3.85372	0.000843004	yes	chr10	50717699	50742685	circRNA	MINDY3	mRNA
circRNA4973	up	1.98223	0.000847252	yes	chr8	41196878	41208316	circRNA	DCUN1D4	mRNA
circRNA6940	up	4.39698	0.000890484	yes	chr14	67519537	67557363	circRNA	FAM13C	mRNA
circRNA6788	up	3.27425	0.000902175	yes	chr13	119186602	119214179	circRNA	PLD1	mRNA
circRNA3808	up	2.72271	0.000910119	yes	chr4	77290431	77300850	circRNA	GGH	mRNA
circRNA2268	up	Inf	0.000912108	yes	chr9	100140298	100159872	circRNA	ENSSSCG00000015379	mRNA
circRNA3941	up	2.17249	0.000920291	yes	chr1	143995379	144007016	circRNA	TMEM87A	mRNA
circRNA1807	up	2.30468	0.000920947	yes	chr14	97469111	97470263	circRNA	VSTM4	mRNA
circRNA1082	up	1.91308	0.000922082	yes	chr10	75673703	75704449	circRNA	LARP4B	mRNA
circRNA1070	up	2.82606	0.000930198	yes	chr10	9709752	9731216	circRNA	ENSSSCG00000027207	mRNA
circRNA4311	up	3.42664	0.000938944	yes	chr14	92380920	92416252	circRNA	CCSER2	mRNA
ciRNA159	down	-2.94276	0.000944477	yes	chr5	84082909	84083870	ciRNA	HSP90B1	mRNA
circRNA2926	up	4.85934	0.000946877	yes	chr13	84695582	84699701	circRNA	ENSSSCG00000011652	mRNA
circRNA932	up	1.29829	0.000961086	yes	chr3	43206730	43208056	circRNA	ENSSSCG00000029797	mRNA
circRNA5949	up	2.30402	0.000971249	yes	chr3	10479905	10492534	circRNA	BAZ1B	mRNA
circRNA5498	up	1.94897	0.000997025	yes	chr4	67752436	67779115	circRNA	UBE2W	mRNA
circRNA3029	up	1.97778	0.00100302	yes	chr14	10509113	10513787	circRNA	DOCK5	mRNA
circRNA4696	down	-2.44932	0.00100311	yes	chr2	90657589	90660943	circRNA	ENSSSCG00000014119	mRNA
circRNA4750	up	3.10547	0.00100414	yes	chr1	86310250	86333500	circRNA	RPF2	mRNA
circRNA729	up	4.40661	0.00100889	yes	chr9	131977044	131984867	circRNA	RASAL2	mRNA
circRNA5042	up	3.65607	0.00101844	yes	chr13	72895321	72895578	circRNA	ENSSSCG00000011540	mRNA
circRNA4698	up	3.26543	0.00102014	yes	chr2	93866530	93868582	circRNA	VCAN	mRNA
circRNA1536	up	3.1429	0.00103176	yes	chr8	40451377	40459063	circRNA	ENSSSCG00000008826	mRNA
circRNA195	down	-2.05777	0.00103435	yes	chr2	123502993	123503411	circRNA	KCNN2	mRNA
circRNA5884	up	3.68089	0.00103902	yes	chr5	9741142	9741366	circRNA	ENSSSCG00000000152	mRNA
circRNA611	up	1.63872	0.00105739	yes	chr4	74137261	74204622	circRNA	ENSSSCG00000023518	mRNA
circRNA854	up	3.5156	0.00105861	yes	chr14	122238908	122257813	circRNA	BTRC	mRNA
circRNA5650	down	-1.12377	0.00106135	yes	chr8	43554347	43555826	circRNA	KIT	mRNA
circRNA2870	up	3.23847	0.00106425	yes	chr18	21430442	21512785	circRNA	ENSSSCG00000016590	mRNA
circRNA327	up	5.52929	0.00107188	yes	chr8	133864713	133875510	circRNA	BMPR1B	mRNA
circRNA1189	up	3.20378	0.00108484	yes	chr6	74980742	74991645	circRNA	KDM1A	mRNA
circRNA5063	up	2.31416	0.00110576	yes	chr13	119164772	119186715	circRNA	PLD1	mRNA
circRNA1063	down	-1.89376	0.0011142	yes	chr12	62856130	62863000	circRNA	ENSSSCG00000018049	mRNA
circRNA1546	up	2.47659	0.00111485	yes	chr8	71567714	71589148	circRNA	MOB1B	mRNA
circRNA3649	up	3.9879	0.00111894	yes	chr14	83848097	83851733	circRNA	SAMD8	mRNA
circRNA3252	up	3.63358	0.00112103	yes	chr2	44182481	44234185	circRNA	SERGEF	mRNA
circRNA408	up	2.8334	0.00113188	yes	chr11	56292568	56303570	circRNA	NDFIP2	mRNA
circRNA782	up	2.2477	0.00113394	yes	chr12	48127558	48128160	circRNA	SLC6A4	mRNA
circRNA4282	up	1.6212	0.0011345	yes	chr14	7103656	7114145	circRNA	SLC39A14	mRNA
circRNA5131	down	-2.02451	0.00113559	yes	chr12	62862828	62866191	circRNA	ENSSSCG00000018049	mRNA
circRNA6885	up	1.96811	0.001146	yes	chr16	3981664	3991249	circRNA	ENSSSCG00000029792	mRNA
circRNA5526	up	2.1204	0.00115463	yes	chr3	76349405	76364908	circRNA	AAK1	mRNA
circRNA4392	up	4.27491	0.00116195	yes	chr7	96009559	96038583	circRNA	FUT8	mRNA
circRNA849	up	4.58538	0.00116223	yes	chr14	92425152	92495988	circRNA	CCSER2	mRNA
circRNA6412	down	-1.65622	0.00116744	yes	chr7	29524893	29525107	circRNA	BRD2	mRNA
circRNA241	up	2.72989	0.00118544	yes	chr1	227152127	227155059	circRNA	DENND4C	mRNA
circRNA2215	up	1.72867	0.00118842	yes	chr18	18671313	18690307	circRNA	MKLN1	mRNA
circRNA4211	up	3.17335	0.00119293	yes	chr17	36729287	36735559	circRNA	C20orf194	mRNA
circRNA2040	up	3.74502	0.00119335	yes	chr3	49650338	49663460	circRNA	CCDC138	mRNA
circRNA398	up	2.50582	0.00120449	yes	chr12	59366760	59383777	circRNA	MAP2K4	mRNA
circRNA1254	up	3.72919	0.00120872	yes	chr4	19841216	19852793	circRNA	COL14A1	mRNA
circRNA100	up	1.60599	0.0012129	yes	chr4	37544234	37556944	circRNA	CU459197.4	mRNA
circRNA2972	up	1.53092	0.00122629	yes	chr10	11891726	11927201	circRNA	RAB3GAP2	mRNA
circRNA3563	up	4.57879	0.00122829	yes	chr17	36694691	36699086	circRNA	C20orf194	mRNA
circRNA4953	up	3.28538	0.00123182	yes	chr9	143250723	143269875	circRNA	RPS6KC1	mRNA
circRNA2237	up	3.29201	0.00124113	yes	chr9	8159257	8179287	circRNA	FCHSD2	mRNA
circRNA1966	up	2.88213	0.00124441	yes	chr5	83062597	83082256	circRNA	SLC41A2	mRNA
circRNA3098	up	Inf	0.00125256	yes	chr6	25483252	25484070	circRNA	ENSSSCG00000024253	mRNA
circRNA399	down	-1.7686	0.00125535	yes	chr12	62856130	62866191	circRNA	ENSSSCG00000018049	mRNA
circRNA2984	up	2.98705	0.00125986	yes	chr10	61727666	61744522	circRNA	NRP1	mRNA
circRNA5655	up	1.72534	0.00126739	yes	chr8	90710288	90731287	circRNA	INPP4B	mRNA
circRNA4158	up	1.08589	0.00127995	yes	chr11	7796074	7817517	circRNA	B3GLCT	mRNA
circRNA355	down	-1.30635	0.00128273	yes	chr13	130101830	130103494	circRNA	ENSSSCG00000011772	mRNA
circRNA5381	up	1.64433	0.00128774	yes	chr14	123198170	123209780	circRNA	GBF1	mRNA
circRNA4002	up	4.53549	0.00128782	yes	chr18	42654420	42689446	circRNA	DPY19L1	mRNA
circRNA1905	up	2.62193	0.00130872	yes	chr6	64724021	64778476	circRNA	PEX14	mRNA
circRNA776	up	4.09384	0.00132533	yes	chr12	40590783	40593559	circRNA	TADA2A	mRNA
circRNA5082	up	4.17977	0.00133629	yes	chr13	149599667	149627995	circRNA	GSK3B	mRNA
circRNA3999	up	3.82705	0.00133781	yes	chr18	36505709	36535413	circRNA	ENSSSCG00000025602	mRNA
circRNA6756	up	3.78766	0.00135816	yes	chr8	140260091	140263164	circRNA	PKD2	mRNA
circRNA1833	up	1.70631	0.00135894	yes	chrX	40375709	40383814	circRNA	ATP6AP2	mRNA
circRNA5064	up	3.12531	0.00135939	yes	chr13	119184171	119205216	circRNA	PLD1	mRNA
circRNA3440	down	-1.99632	0.00137331	yes	chr8	141043787	141045499	circRNA	ENSSSCG00000009224	mRNA
circRNA527	up	2.84629	0.00139105	yes	chr14	132251502	132258271	circRNA	PDCD4	mRNA
circRNA4607	up	2.48649	0.00139129	yes	chr3	42964694	42969522	circRNA	ENSSSCG00000008068	mRNA
circRNA6730	up	2.01255	0.00141792	yes	chr9	145612608	145620727	circRNA	HHAT	mRNA
circRNA5112	up	1.73674	0.00142022	yes	chr12	34014368	34023510	circRNA	SCPEP1	mRNA
circRNA6048	down	-1.90122	0.00143337	yes	chr1	124880332	124884580	circRNA	MYO1E	mRNA
circRNA3078	up	1.60851	0.00144235	yes	chr7	21551602	21573043	circRNA	CARMIL1	mRNA
circRNA4942	up	3.5897	0.00145468	yes	chr9	124480584	124525558	circRNA	TPK1	mRNA
circRNA1680	down	-1.46956	0.00146776	yes	chr11	86962116	86962417	circRNA	PSPC1	mRNA
circRNA862	up	4.04641	0.00147142	yes	chrX	46489086	46504346	circRNA	JADE3	mRNA
circRNA1993	up	2.54861	0.0014854	yes	chr4	77287084	77295572	circRNA	GGH	mRNA
circRNA5054	up	1.24783	0.00148737	yes	chr13	98113084	98191973	circRNA	RNF13	mRNA
circRNA13	up	2.31273	0.00148889	yes	chr7	69874055	69878724	circRNA	BAZ1A	mRNA
circRNA4247	up	1.59927	0.00149214	yes	chr15	34770888	34851487	circRNA	ENSSSCG00000027791	mRNA
circRNA5360	up	3.50629	0.00150025	yes	chr14	68195867	68212247	circRNA	CCDC6	mRNA
circRNA2088	up	2.23229	0.00150335	yes	chr2	27347578	27409648	circRNA	LDLRAD3	mRNA
circRNA266	up	3.05701	0.00151212	yes	chr18	18699816	18715721	circRNA	MKLN1	mRNA
circRNA2373	up	Inf	0.00151248	yes	chr13	81546802	81547042	circRNA	ENSSSCG00000011634	mRNA
circRNA6286	up	3.70238	0.0015144	yes	chr16	19041412	19045823	circRNA	ENSSSCG00000016810	mRNA
circRNA2623	up	3.2314	0.00152589	yes	chr14	81008366	81015222	circRNA	ENSSSCG00000023130	mRNA
circRNA4078	up	1.98451	0.00153394	yes	chr8	144674980	144688396	circRNA	LIN54	mRNA
circRNA4968	up	2.57434	0.00153477	yes	chr8	32895877	32918532	circRNA	N4BP2	mRNA
circRNA6191	up	3.45072	0.00153873	yes	chr13	119145908	119214179	circRNA	PLD1	mRNA
circRNA6650	up	1.88409	0.00154357	yes	chr1	124986333	124997171	circRNA	RNF111	mRNA
circRNA6411	up	1.7482	0.00154702	yes	chr7	21490691	21521517	circRNA	CARMIL1	mRNA
circRNA6335	up	2.64574	0.00154813	yes	chr15	142756903	142760356	circRNA	AGFG1	mRNA
circRNA4844	down	-3.31341	0.00154966	yes	chr18	3014082	3015829	circRNA	INSIG1	mRNA
circRNA1338	up	2.90332	0.00155257	yes	chr2	20608547	20611393	circRNA	TTC17	mRNA
circRNA6962	down	-3.19078	0.00155274	yes	chr14	145123173	145131457	circRNA	CHST15	mRNA
circRNA1959	up	2.15887	0.0015699	yes	chr5	70319577	70339367	circRNA	WNK1	mRNA
ciRNA242	down	-2.64642	0.00157174	yes	chr1	299757508	299757886	ciRNA	HSPA5	mRNA
circRNA5427	down	-2.43141	0.00158893	yes	chr7	44466870	44468319	circRNA	ENSSSCG00000001695	mRNA
circRNA4072	up	6.33567	0.00159102	yes	chr8	133864713	133985235	circRNA	BMPR1B	mRNA
circRNA6565	up	1.98156	0.0015949	yes	chr3	55089811	55093893	circRNA	MAP4K4	mRNA
circRNA5000	up	4.87353	0.00160269	yes	chr8	117114093	117189529	circRNA	CAMK2D	mRNA
circRNA6901	up	2.66862	0.00160673	yes	chr15	71690220	71709108	circRNA	ACVR1	mRNA
circRNA4626	up	2.54475	0.00161694	yes	chr3	84254791	84274997	circRNA	ENSSSCG00000008382	mRNA
circRNA5007	up	6.36587	0.00165715	yes	chr8	133875351	133985235	circRNA	BMPR1B	mRNA
circRNA4156	up	1.54417	0.0016583	yes	chr11	466843	502116	circRNA	ZDHHC20	mRNA
circRNA3838	up	3.0928	0.00167729	yes	chr3	43036166	43044332	circRNA	ENSSSCG00000024292	mRNA
circRNA5979	up	1.79412	0.00168677	yes	chr3	121176577	121180184	circRNA	ADCY3	mRNA
circRNA1489	up	3.16445	0.00169524	yes	chr18	59628324	59641061	circRNA	CDK13	mRNA
circRNA2067	up	2.7186	0.0017	yes	chr3	125880427	125885642	circRNA	PUM2	mRNA
circRNA785	down	-1.75839	0.00173427	yes	chr12	62856482	62866191	circRNA	ENSSSCG00000018049	mRNA
circRNA3086	down	-2.66698	0.0017429	yes	chr7	80266702	80267078	circRNA	DHRS1	mRNA
circRNA1372	up	1.8155	0.00174626	yes	chr2	139294756	139302115	circRNA	ENSSSCG00000014269	mRNA
circRNA3472	up	2.94448	0.00175928	yes	chr13	119154837	119164906	circRNA	PLD1	mRNA
circRNA5506	up	2.85811	0.00177755	yes	chr4	129315285	129481379	circRNA	CDC14A	mRNA
circRNA2807	down	-2.79553	0.00178614	yes	chr2	90657589	90658589	circRNA	ENSSSCG00000014119	mRNA
circRNA4745	up	2.47718	0.00183025	yes	chr1	83314425	83323066	circRNA	SEC63	mRNA
circRNA5316	up	2.41613	0.00185107	yes	chr14	10552563	10558715	circRNA	DOCK5	mRNA
circRNA4027	down	-3.20586	0.00187071	yes	chr9	72762799	72763825	circRNA	SLC41A1	mRNA
ciRNA19	up	1.68979	0.00188407	yes	chr12	1163312	1163659	ciRNA	ACTG1	mRNA
circRNA4105	up	2.97974	0.00188657	yes	chr13	91211618	91226772	circRNA	TRPC1	mRNA
circRNA1471	up	3.25012	0.0019132	yes	chr18	21408481	21512785	circRNA	ENSSSCG00000016590	mRNA
circRNA3051	up	6.08319	0.00192188	yes	chr14	97937295	97945977	circRNA	ERCC6	mRNA
circRNA6804	up	2.92927	0.0019242	yes	chr13	160817091	160860539	circRNA	ENSSSCG00000011943	mRNA
circRNA3173	up	1.86317	0.00192569	yes	chr4	67752436	67773257	circRNA	UBE2W	mRNA
circRNA6640	up	2.76208	0.00192649	yes	chr1	86607529	86631512	circRNA	ENSSSCG00000025703	mRNA
circRNA3846	down	-2.25533	0.00192763	yes	chr3	67152058	67152324	circRNA	ENSSSCG00000008254	mRNA
circRNA603	up	2.95425	0.00196922	yes	chr4	6189102	6201966	circRNA	CU151851.1	mRNA
circRNA3952	down	-1.50611	0.0019747	yes	chr1	180982417	180998696	circRNA	IGDCC4	mRNA
circRNA3686	up	3.16867	0.0019759	yes	chr7	16923592	17106510	circRNA	CDKAL1	mRNA
circRNA4895	up	5.31995	0.00198018	yes	chr9	36072628	36134637	circRNA	PGR	mRNA
circRNA2330	up	3.60508	0.00198863	yes	chr8	139697666	139710380	circRNA	ENSSSCG00000026196	mRNA
circRNA2886	up	3.3757	0.00202904	yes	chr9	77414305	77469954	circRNA	CDK14	mRNA
circRNA3514	up	2.72261	0.00203618	yes	chr12	47600223	47634470	circRNA	ENSSSCG00000017790	mRNA
circRNA1425	up	2.27291	0.00207037	yes	chr1	145455671	145467243	circRNA	INO80	mRNA
circRNA6530	up	2.436	0.00207231	yes	chr4	88593582	88636542	circRNA	ENSSSCG00000006282	mRNA
circRNA981	up	2.80832	0.00207573	yes	chr1	146912898	146913323	circRNA	THBS1	mRNA
circRNA2316	up	3.90561	0.00208753	yes	chr8	71582612	71600707	circRNA	MOB1B	mRNA
circRNA843	up	2.92516	0.00208913	yes	chr14	49712439	49717414	circRNA	ENSSSCG00000028707	mRNA
circRNA4613	up	3.43241	0.002104	yes	chr3	46278413	46282403	circRNA	ENSSSCG00000008105	mRNA
circRNA1169	up	2.75838	0.00211969	yes	chr7	102315541	102331206	circRNA	PSEN1	mRNA
circRNA5276	up	5.20879	0.0021297	yes	chr15	65956320	65960174	circRNA	ENSSSCG00000015857	mRNA
circRNA3555	up	2.7638	0.00213259	yes	chr10	76075207	76089926	circRNA	ENSSSCG00000011163	mRNA
circRNA5921	up	1.24605	0.00213503	yes	chr4	35493242	35509312	circRNA	LRP12	mRNA
circRNA4405	up	1.94137	0.00213601	yes	chr7	118931849	118940149	circRNA	ENSSSCG00000002436	mRNA
circRNA4016	up	2.87723	0.00214376	yes	chr9	40777741	40785836	circRNA	ENSSSCG00000025606	mRNA
circRNA4062	up	3.24114	0.00216817	yes	chr8	80764338	80784852	circRNA	ARFIP1	mRNA
circRNA3710	up	3.23641	0.00217672	yes	chr7	102326380	102337819	circRNA	PSEN1	mRNA
circRNA2147	up	1.79942	0.00218669	yes	chr1	57105762	57195641	circRNA	SMAP1	mRNA
circRNA5533	up	1.69015	0.00219454	yes	chr3	113976993	113999569	circRNA	BIRC6	mRNA
circRNA5719	down	-1.30309	0.00222757	yes	chr10	48232668	48233393	circRNA	VIM	mRNA
circRNA1201	up	5.26751	0.0022367	yes	chr6	122037337	122107954	circRNA	ADGRL2	mRNA
circRNA6285	up	2.43679	0.0022422	yes	chr16	6173606	6186594	circRNA	FAM134B	mRNA
circRNA784	up	1.00065	0.00224601	yes	chr12	53977821	53978728	circRNA	KIF1C	mRNA
circRNA2118	down	-3.39543	0.00228737	yes	chr2	90657589	90657767	circRNA	ENSSSCG00000014119	mRNA
circRNA229	up	4.74242	0.00229612	yes	chr1	179099938	179102403	circRNA	CCBE1	mRNA
circRNA3492	up	1.44974	0.00230066	yes	chr13	210621737	210663594	circRNA	ENSSSCG00000012059	mRNA
circRNA6225	up	2.23875	0.00231382	yes	chr12	23750110	23756693	circRNA	NPEPPS	mRNA
circRNA4637	up	1.54044	0.0023279	yes	chr3	109787455	109795840	circRNA	HEATR5B	mRNA
circRNA708	down	-3.58415	0.00233537	yes	chr18	3014431	3015829	circRNA	INSIG1	mRNA
circRNA1921	up	1.70491	0.00235972	yes	chr6	99506005	99547687	circRNA	MIB1	mRNA
circRNA6976	up	3.71935	0.00236747	yes	chrX	103679147	103679431	circRNA	ENSSSCG00000012572	mRNA
circRNA6126	down	-3.47324	0.00237042	yes	chr9	98644963	98648601	circRNA	ITGB8	mRNA
circRNA1548	up	1.47968	0.00237291	yes	chr8	75542191	75558337	circRNA	USO1	mRNA
circRNA2888	up	2.36839	0.00238133	yes	chr9	83210128	83252558	circRNA	SLC25A13	mRNA
circRNA1972	up	3.06866	0.00239337	yes	chr5	93432413	93435648	circRNA	PLXNC1	mRNA
circRNA1733	up	2.16595	0.00242031	yes	chr16	56200707	56212695	circRNA	SH3PXD2B	mRNA
circRNA6095	down	-2.01905	0.00247514	yes	chr1	305183643	305188223	circRNA	NUP214	mRNA
circRNA6602	up	1.20575	0.00250321	yes	chr2	60814636	60834916	circRNA	ENSSSCG00000013857	mRNA
circRNA2773	down	-2.49573	0.00252171	yes	chr3	67152058	67157403	circRNA	ENSSSCG00000008254	mRNA
circRNA5536	up	2.61377	0.00252326	yes	chr3	120140092	120152093	circRNA	ENSSSCG00000008575	mRNA
circRNA6424	up	1.82947	0.00253047	yes	chr7	62240449	62253629	circRNA	ENSSSCG00000001871	mRNA
circRNA5418	up	2.45418	0.00257791	yes	chrX	114112107	114114521	circRNA	LONRF3	mRNA
circRNA2726	up	3.80802	0.00258919	yes	chr6	148414520	148440705	circRNA	EPS15	mRNA
circRNA1882	up	2.26003	0.00259484	yes	chr7	91884279	91926482	circRNA	CHD2	mRNA
circRNA3529	up	3.58958	0.0025961	yes	chr11	56283465	56299174	circRNA	NDFIP2	mRNA
circRNA6817	up	2.60345	0.00260107	yes	chr12	23736596	23743858	circRNA	NPEPPS	mRNA
circRNA1451	down	-1.88888	0.00264434	yes	chr1	283810273	283824543	circRNA	PTBP3	mRNA
circRNA380	down	-3.34258	0.00264775	yes	chr12	22321255	22323341	circRNA	TOP2A	mRNA
circRNA2859	up	4.71284	0.00265051	yes	chr1	288094922	288096279	circRNA	PAPPA	mRNA
circRNA5414	up	4.303	0.00266028	yes	chrX	85954041	86217418	circRNA	ENSSSCG00000012474	mRNA
circRNA3011	up	2.28065	0.00266341	yes	chr15	22750457	22768247	circRNA	ACTR3	mRNA
circRNA6205	up	3.05856	0.00267118	yes	chr13	160806335	160860539	circRNA	ENSSSCG00000011943	mRNA
circRNA66	up	1.51795	0.0026725	yes	chr5	4603986	4633621	circRNA	EP300	mRNA
circRNA4110	down	-1.08401	0.00267793	yes	chr13	119829725	119833093	circRNA	ENSSSCG00000011752	mRNA
circRNA1635	down	-2.9969	0.00269188	yes	chr12	7872827	7875923	circRNA	SDK2	mRNA
circRNA2053	up	1.89644	0.00269724	yes	chr3	91185717	91190405	circRNA	ENSSSCG00000008408	mRNA
circRNA4568	up	1.61987	0.00269943	yes	chr4	90924840	90936640	circRNA	MPZL1	mRNA
circRNA3023	up	2.31545	0.00271264	yes	chr15	124584175	124666583	circRNA	KANSL1L	mRNA
circRNA6482	up	2.72731	0.00272502	yes	chr6	132124985	132173603	circRNA	ANKRD13C	mRNA
circRNA3161	up	4.56397	0.00276529	yes	chr5	105306004	105332428	circRNA	ACSS3	mRNA
circRNA1779	up	1.67946	0.00278245	yes	chr14	37703812	37732820	circRNA	FBXW8	mRNA
circRNA2300	up	5.17309	0.00279325	yes	chr8	10503213	10507978	circRNA	CC2D2A	mRNA
circRNA1588	down	-1.56589	0.00280491	yes	chr13	33821362	33824539	circRNA	ENSSSCG00000011340	mRNA
circRNA5676	up	1.28644	0.00280573	yes	chr13	119253884	119258239	circRNA	PLD1	mRNA
circRNA2448	up	1.0343	0.00284802	yes	chr11	7796074	7822810	circRNA	B3GLCT	mRNA
circRNA4532	up	3.64992	0.00285754	yes	chr5	105265060	105332428	circRNA	ACSS3	mRNA
circRNA6338	up	1.76134	0.00285898	yes	chr14	10462923	10474925	circRNA	DOCK5	mRNA
circRNA4038	up	2.04204	0.00285996	yes	chr9	124394984	124480730	circRNA	TPK1	mRNA
circRNA4114	up	3.8102	0.00287215	yes	chr13	142562710	142600017	circRNA	DLG1	mRNA
circRNA2426	up	3.4413	0.00287808	yes	chr12	23738975	23742062	circRNA	NPEPPS	mRNA
circRNA4337	up	2.19226	0.00291144	yes	chrX	44578899	44616861	circRNA	KDM6A	mRNA
circRNA534	up	2.00871	0.00292028	yes	chrX	8578423	8581627	circRNA	ARHGAP6	mRNA
circRNA3880	up	2.10029	0.00292295	yes	chr2	53233994	53235771	circRNA	WEE1	mRNA
circRNA3284	up	4.91246	0.00292545	yes	chr1	32082085	32089431	circRNA	AHI1	mRNA
circRNA4055	down	-1.16613	0.00293304	yes	chr8	43554347	43560434	circRNA	KIT	mRNA
circRNA2999	up	5.61798	0.00293927	yes	chr16	37494597	37500411	circRNA	IL6ST	mRNA
circRNA123	up	Inf	0.00295356	yes	chr4	122107165	122109225	circRNA	SLC25A24	mRNA
circRNA1772	up	1.31585	0.00298926	yes	chr14	24992289	25023926	circRNA	SFSWAP	mRNA
circRNA4622	down	-4.62947	0.00298951	yes	chr3	66536815	66536967	circRNA	ENSSSCG00000008250	mRNA
circRNA3515	up	2.32661	0.00299069	yes	chr12	47600223	47640694	circRNA	ENSSSCG00000017790	mRNA
circRNA6738	up	3.15411	0.00299839	yes	chr8	32731504	32753100	circRNA	PDS5A	mRNA
circRNA3301	up	3.56056	0.00302521	yes	chr1	123383836	123401996	circRNA	ANXA2	mRNA
circRNA5796	up	1.81322	0.00303093	yes	chr7	112298	137678	circRNA	EXOC2	mRNA
circRNA3226	up	2.4458	0.00305095	yes	chr3	114041982	114049273	circRNA	BIRC6	mRNA
circRNA3665	up	1.88222	0.00305153	yes	chrX	12384750	12409755	circRNA	MOSPD2	mRNA
circRNA6739	up	1.85753	0.00305293	yes	chr8	41183979	41208316	circRNA	DCUN1D4	mRNA
circRNA357	up	2.35581	0.00305379	yes	chr13	132340116	132393974	circRNA	ENSSSCG00000021272	mRNA
circRNA6769	up	3.46477	0.00306566	yes	chr13	21030220	21068730	circRNA	ENSSSCG00000011236	mRNA
circRNA6948	up	1.93631	0.00308913	yes	chr14	96782527	96788772	circRNA	MAPK8	mRNA
circRNA2021	up	2.44247	0.00313385	yes	chr3	5269524	5280062	circRNA	ENSSSCG00000025940	mRNA
circRNA6031	down	-Inf	0.00314027	yes	chr1	16551393	16551576	circRNA	ESR1	mRNA
circRNA5817	up	2.35253	0.00314185	yes	chr7	97739664	97747301	circRNA	RDH11	mRNA
circRNA2754	up	5.33236	0.00314205	yes	chr4	122107165	122117431	circRNA	SLC25A24	mRNA
circRNA4967	up	2.19022	0.00315088	yes	chr8	32728074	32737837	circRNA	PDS5A	mRNA
circRNA3567	down	-2.42599	0.0031709	yes	chr17	46533185	46536081	circRNA	RPRD1B	mRNA
circRNA6790	up	3.02307	0.00318757	yes	chr13	119273664	119278934	circRNA	PLD1	mRNA
circRNA2931	up	1.55314	0.00319156	yes	chr13	98113084	98155714	circRNA	RNF13	mRNA
circRNA2595	up	2.62556	0.00319421	yes	chr14	10500874	10505232	circRNA	DOCK5	mRNA
circRNA630	up	1.57588	0.00320852	yes	chr3	42993575	43004246	circRNA	ENSSSCG00000008068	mRNA
circRNA1654	up	2.34378	0.00321816	yes	chr12	47640593	47645844	circRNA	ENSSSCG00000017790	mRNA
circRNA5230	up	4.09119	0.00323026	yes	chr16	19127489	19136391	circRNA	ENSSSCG00000016810	mRNA
circRNA851	up	2.0161	0.00323516	yes	chr14	112947191	112960016	circRNA	TNKS2	mRNA
circRNA4283	up	1.33478	0.00324421	yes	chr14	10459275	10470943	circRNA	DOCK5	mRNA
circRNA6486	up	3.12369	0.00325595	yes	chr6	148924023	149069232	circRNA	FAF1	mRNA
circRNA1813	up	2.47148	0.00327405	yes	chr14	116845427	116851525	circRNA	ALDH18A1	mRNA
circRNA1567	up	2.66762	0.00328767	yes	chr8	133864713	133865560	circRNA	BMPR1B	mRNA
circRNA5997	down	-4.38414	0.00333217	yes	chr2	59484240	59484748	circRNA	JAK3	mRNA
ciRNA20	down	-1.27753	0.0033372	yes	chr12	52869446	52869770	ciRNA	PITPNM3	mRNA
circRNA6247	up	1.97947	0.00333988	yes	chr11	81567206	81586734	circRNA	EFNB2	mRNA
circRNA2965	up	4.91907	0.00336509	yes	chr11	52212325	52224225	circRNA	ENSSSCG00000009464	mRNA
ciRNA100	up	1.72672	0.00336617	yes	chr12	1163312	1163661	ciRNA	ACTG1	mRNA
circRNA570	up	3.03862	0.0033693	yes	chr7	102315541	102337819	circRNA	PSEN1	mRNA
circRNA2009	up	3.44259	0.00338382	yes	chr4	122111822	122115826	circRNA	SLC25A24	mRNA
circRNA1379	up	1.8675	0.00338895	yes	chr2	144038957	144051595	circRNA	SMAD5	mRNA
circRNA1240	up	2.10542	0.00339292	yes	chr5	93402670	93405323	circRNA	PLXNC1	mRNA
circRNA4716	down	-2.70524	0.00343939	yes	chr1	2805468	2814551	circRNA	AFDN	mRNA
circRNA1981	up	1.87072	0.00346234	yes	chr4	38240989	38259310	circRNA	NCALD	mRNA
circRNA6014	up	2.03873	0.00346584	yes	chr2	93802209	93806363	circRNA	VCAN	mRNA
circRNA5851	up	1.89705	0.0034675	yes	chr6	85261799	85284732	circRNA	AGO4	mRNA
circRNA3159	up	3.01492	0.00346811	yes	chr5	105265060	105306144	circRNA	ACSS3	mRNA
circRNA6041	up	1.58086	0.00347067	yes	chr1	83303147	83316767	circRNA	SEC63	mRNA
circRNA3172	up	3.68219	0.00347399	yes	chr4	56568602	56584883	circRNA	ENSSSCG00000006146	mRNA
circRNA315	down	-1.54901	0.00350382	yes	chr8	76896146	76900030	circRNA	CCNI	mRNA
circRNA1520	up	3.70425	0.00353408	yes	chr9	136784846	136785064	circRNA	ENSSSCG00000015556	mRNA
circRNA3430	up	1.9774	0.00355168	yes	chr8	87952704	87993701	circRNA	ZNF827	mRNA
circRNA1162	up	3.45265	0.00356239	yes	chr7	91964457	91969641	circRNA	CHD2	mRNA
circRNA4336	up	2.5805	0.00356867	yes	chrX	41016299	41016887	circRNA	USP9X	mRNA
circRNA537	down	-1.06719	0.00362292	yes	chrX	19334301	19351890	circRNA	SMS	mRNA
circRNA6732	up	2.08286	0.00363417	yes	chr8	931841	937101	circRNA	RNF4	mRNA
circRNA716	up	4.89069	0.00364785	yes	chr18	42657893	42674455	circRNA	DPY19L1	mRNA
circRNA6255	up	3.18782	0.00365751	yes	chr10	16256296	16280971	circRNA	ENAH	mRNA
circRNA4805	up	6.07564	0.00366609	yes	chr1	226060684	226070353	circRNA	MLLT3	mRNA
circRNA1852	up	1.7943	0.00366942	yes	chr7	112298	130444	circRNA	EXOC2	mRNA
circRNA1046	down	-2.51255	0.00370562	yes	chr12	5193200	5194267	circRNA	RNF157	mRNA
circRNA4164	up	1.86663	0.00373252	yes	chr11	26262333	26280812	circRNA	NAA16	mRNA
circRNA5857	up	2.49776	0.00375442	yes	chr6	99103127	99121058	circRNA	GREB1L	mRNA
circRNA829	up	3.08859	0.00375661	yes	chr15	66313353	66361485	circRNA	WDR33	mRNA
circRNA5134	up	2.35058	0.00376123	yes	chr11	4038375	4048067	circRNA	USP12	mRNA
circRNA454	up	7.27185	0.0037814	yes	chr16	31065135	31121257	circRNA	ENSSSCG00000026527	mRNA
circRNA6005	down	-1.04986	0.00382242	yes	chr2	78365051	78365225	circRNA	PTBP1	mRNA
circRNA1915	up	2.07062	0.00382675	yes	chr6	89159443	89216201	circRNA	RLF	mRNA
circRNA3169	down	-5.87642	0.003846	yes	chr4	39272528	39291867	circRNA	SNX31	mRNA
circRNA522	up	1.75776	0.00385475	yes	chr14	113089511	113106681	circRNA	ENSSSCG00000010467	mRNA
circRNA1608	up	1.1868	0.00388656	yes	chr13	98113084	98181473	circRNA	RNF13	mRNA
circRNA5932	up	2.85838	0.00389187	yes	chr4	102480780	102481626	circRNA	SMG5	mRNA
circRNA5865	up	1.26727	0.00389237	yes	chr6	103715572	103741524	circRNA	SS18	mRNA
circRNA3960	up	1.92346	0.00389823	yes	chr1	249459092	249488008	circRNA	PTAR1	mRNA
circRNA493	up	1.16854	0.00390094	yes	chr14	10459275	10465714	circRNA	DOCK5	mRNA
circRNA2828	up	2.24837	0.00391883	yes	chr1	57105762	57208795	circRNA	SMAP1	mRNA
circRNA1524	up	3.14778	0.0039192	yes	chr9	145510358	145612779	circRNA	HHAT	mRNA
circRNA2280	down	-2.34415	0.00393553	yes	chr9	126533034	126547717	circRNA	ENSSSCG00000015485	mRNA
circRNA999	up	1.12756	0.00393672	yes	chr1	305420079	305423520	circRNA	ENSSSCG00000005715	mRNA
circRNA4476	up	2.34365	0.00394717	yes	chr6	146123453	146128074	circRNA	YIPF1	mRNA
circRNA4463	down	-2.295	0.00395027	yes	chr6	101802150	101804423	circRNA	OSBPL1A	mRNA
circRNA201	up	1.68195	0.0039508	yes	chr2	148139473	148156756	circRNA	ANKHD1	mRNA
circRNA150	up	1.50969	0.00398734	yes	chr3	72122816	72124943	circRNA	TET3	mRNA
circRNA3230	up	2.39368	0.00401783	yes	chr3	120396177	120418112	circRNA	ENSSSCG00000008576	mRNA
circRNA2438	up	2.25083	0.00402158	yes	chr12	47640593	47646705	circRNA	ENSSSCG00000017790	mRNA
circRNA6104	up	2.31481	0.00402544	yes	chr9	6888097	6946013	circRNA	STIM1	mRNA
circRNA4140	up	2.04472	0.00404127	yes	chr12	37697401	37720372	circRNA	ENSSSCG00000017672	mRNA
circRNA548	up	1.3563	0.00405538	yes	chrX	127132748	127142583	circRNA	SLC9A6	mRNA
circRNA5766	up	1.8521	0.00405944	yes	chr14	10459275	10479267	circRNA	DOCK5	mRNA
circRNA4431	down	-2.17149	0.00406395	yes	chr6	63739623	63746320	circRNA	ENO1	mRNA
circRNA1735	up	2.18488	0.00406646	yes	chr16	78213889	78217793	circRNA	MARCH6	mRNA
circRNA3315	up	3.78676	0.00407191	yes	chr1	181057330	181077882	circRNA	DPP8	mRNA
circRNA6518	up	2.16541	0.00407563	yes	chr4	2021944	2027637	circRNA	SLC45A4	mRNA
circRNA1676	up	3.55583	0.00408137	yes	chr11	72290089	72305113	circRNA	ENSSSCG00000009502	mRNA
circRNA1650	up	2.82005	0.00408219	yes	chr12	40294951	40297612	circRNA	ACACA	mRNA
circRNA5394	up	5.74604	0.00409676	yes	chrX	13331565	13339634	circRNA	AP1S2	mRNA
circRNA694	up	5.01813	0.00409696	yes	chr1	205472022	205481309	circRNA	KTN1	mRNA
circRNA6224	up	3.35335	0.00411956	yes	chr12	23727465	23750252	circRNA	NPEPPS	mRNA
circRNA1238	up	2.26426	0.00415267	yes	chr5	89540810	89545223	circRNA	ENSSSCG00000000884	mRNA
circRNA3734	down	-2.01935	0.0041621	yes	chr6	63745679	63746888	circRNA	ENO1	mRNA
circRNA3156	down	-1.65399	0.00416711	yes	chr5	92502063	92512352	circRNA	NR2C1	mRNA
circRNA2953	up	3.1489	0.00417335	yes	chr12	44862944	44865410	circRNA	UTP6	mRNA
circRNA2996	up	1.24182	0.004178	yes	chr16	29720121	29732020	circRNA	NNT	mRNA
circRNA661	down	-1.35934	0.00420439	yes	chr2	83218053	83229420	circRNA	SIMC1	mRNA
circRNA5053	up	Inf	0.00426219	yes	chr13	91298951	91311625	circRNA	PCOLCE2	mRNA
circRNA4597	down	-1.7693	0.00426431	yes	chr3	11060821	11063801	circRNA	RFC2	mRNA
circRNA4923	up	2.42663	0.0042671	yes	chr9	83231317	83273587	circRNA	SLC25A13	mRNA
circRNA2835	up	3.27296	0.00427001	yes	chr1	113957632	113959372	circRNA	MBD2	mRNA
circRNA1411	down	-1.15439	0.00429607	yes	chr1	124801758	124811336	circRNA	MYO1E	mRNA
circRNA3623	up	1.95967	0.0043004	yes	chr14	37745225	37749858	circRNA	FBXW8	mRNA
circRNA3533	up	2.25521	0.00430083	yes	chr10	7636370	7648121	circRNA	ENSSSCG00000010811	mRNA
circRNA4905	down	-3.49201	0.00430897	yes	chr9	53718806	53733176	circRNA	ENSSSCG00000026007	mRNA
circRNA3841	up	5.53505	0.0043181	yes	chr3	55922613	55951059	circRNA	ENSSSCG00000008171	mRNA
circRNA5203	up	2.75869	0.00433015	yes	chr17	32994293	33023407	circRNA	KIZ	mRNA
circRNA5756	up	1.51205	0.0043302	yes	chr15	73900098	73912653	circRNA	MARCH7	mRNA
circRNA633	up	2.54772	0.00433052	yes	chr3	72083202	72105049	circRNA	TET3	mRNA
circRNA57	up	1.96991	0.00435984	yes	chr6	148414520	148422837	circRNA	EPS15	mRNA
circRNA2007	up	2.88588	0.00436923	yes	chr4	112851286	112891675	circRNA	GDAP2	mRNA
circRNA433	up	1.86783	0.00438394	yes	chr10	62755545	62782098	circRNA	PARD3	mRNA
circRNA6003	up	2.4435	0.00441221	yes	chr2	75603474	75611998	circRNA	ENSSSCG00000013490	mRNA
circRNA4618	up	2.98759	0.00443272	yes	chr3	56538963	56551971	circRNA	ENSSSCG00000008176	mRNA
circRNA2694	down	-4.47069	0.00444083	yes	chr7	57839704	57839892	circRNA	CPEB1	mRNA
circRNA2041	up	3.83192	0.00448132	yes	chr3	55870994	55873745	circRNA	ENSSSCG00000008171	mRNA
circRNA6531	up	1.42155	0.00448482	yes	chr4	91809302	91810743	circRNA	ENSSSCG00000006317	mRNA
circRNA6045	down	-1.23263	0.00452142	yes	chr1	110536583	110548336	circRNA	SMAD4	mRNA
circRNA5616	up	3.33489	0.00452202	yes	chr18	18641519	18645486	circRNA	MKLN1	mRNA
circRNA4713	up	1.77654	0.00453463	yes	chr2	157392650	157405704	circRNA	CSNK1A1L	mRNA
circRNA4529	up	3.52969	0.00456416	yes	chr5	92374970	92379754	circRNA	FGD6	mRNA
circRNA1016	up	2.07932	0.00458014	yes	chr8	32724591	32737837	circRNA	PDS5A	mRNA
circRNA4174	up	1.54822	0.0045853	yes	chr10	7643479	7656478	circRNA	ENSSSCG00000010811	mRNA
circRNA2672	up	2.04287	0.00459067	yes	chrX	70818283	70835105	circRNA	MAGT1	mRNA
circRNA4715	down	-3.07784	0.0046011	yes	chr1	2764696	2770778	circRNA	AFDN	mRNA
circRNA6340	up	1.98773	0.0046041	yes	chr14	10465557	10479267	circRNA	DOCK5	mRNA
circRNA2341	up	3.50694	0.00460643	yes	chr13	2398096	2401277	circRNA	CAPN7	mRNA
circRNA848	up	1.90903	0.00462445	yes	chr14	92407605	92416252	circRNA	CCSER2	mRNA
circRNA4816	up	4.10465	0.00462903	yes	chr1	256867612	256879435	circRNA	VPS13A	mRNA
circRNA5192	up	1.83723	0.00464292	yes	chr10	62803459	62839160	circRNA	PARD3	mRNA
circRNA184	up	6.4902	0.00465666	yes	chr2	86111721	86131375	circRNA	COL4A3BP	mRNA
circRNA2403	up	5.28289	0.00465786	yes	chr13	205975263	205982323	circRNA	ENSSSCG00000029392	mRNA
circRNA6159	down	-1.71774	0.00466811	yes	chr8	117447703	117498361	circRNA	ANK2	mRNA
circRNA2180	up	5.46755	0.0046786	yes	chr1	179099938	179112850	circRNA	CCBE1	mRNA
circRNA1229	up	2.94622	0.00469053	yes	chr5	56918746	56928732	circRNA	AEBP2	mRNA
circRNA1247	up	2.39388	0.00469972	yes	chr4	2173289	2233356	circRNA	PTK2	mRNA
circRNA3389	up	3.85853	0.00470103	yes	chr9	77626464	77725461	circRNA	CDK14	mRNA
circRNA3601	up	Inf	0.00470951	yes	chr15	79419897	79428103	circRNA	ENSSSCG00000025598	mRNA
circRNA1847	up	1.16919	0.00471606	yes	chrX	125365423	125380842	circRNA	GPC4	mRNA
circRNA3343	down	-1.47529	0.00472664	yes	chr1	305204959	305209542	circRNA	NUP214	mRNA
circRNA2358	up	1.66455	0.00473578	yes	chr13	36916968	36924271	circRNA	DCAF1	mRNA
circRNA1245	up	2.67365	0.00476418	yes	chr5	105210066	105250420	circRNA	ACSS3	mRNA
circRNA3695	down	-1.66072	0.00479251	yes	chr7	48159326	48164652	circRNA	PLA2G7	mRNA
circRNA3390	up	2.10802	0.00483815	yes	chr9	78882583	78900203	circRNA	KRIT1	mRNA
ciRNA87	up	3.36811	0.00489339	yes	chr1	33252297	33252560	ciRNA	SGK1	mRNA
circRNA3105	down	-2.24692	0.00490761	yes	chr6	63739623	63744340	circRNA	ENO1	mRNA
circRNA6883	up	2.72254	0.00490984	yes	chr17	57032212	57062606	circRNA	ARFGEF2	mRNA
circRNA1020	up	3.08355	0.00491142	yes	chr8	40587742	40601513	circRNA	ENSSSCG00000008827	mRNA
circRNA2810	up	3.9724	0.00492481	yes	chr2	117785151	117898347	circRNA	ENSSSCG00000014190	mRNA
circRNA4220	up	4.44997	0.00494601	yes	chr16	21136449	21275204	circRNA	RAI14	mRNA
circRNA6309	up	4.54313	0.00494661	yes	chr15	20073032	20157746	circRNA	MGAT5	mRNA
circRNA2482	up	3.0071	0.00494909	yes	chr10	17976426	18124093	circRNA	AKT3	mRNA
circRNA4424	up	1.59692	0.00495426	yes	chr6	51859495	51868299	circRNA	SPACA6	mRNA
circRNA704	up	2.96458	0.00496686	yes	chr1	281522291	281719052	circRNA	PALM2	mRNA
circRNA2459	up	2.89389	0.00498167	yes	chr11	24236647	24279091	circRNA	ENSSSCG00000021818	mRNA
circRNA6651	up	4.06215	0.00500225	yes	chr1	127008932	127433537	circRNA	CH242-58J12.2	mRNA
circRNA4342	up	1.11369	0.00500265	yes	chrX	112858629	112871640	circRNA	LAMP2	mRNA
circRNA2825	up	5.42656	0.00501739	yes	chr1	35973866	35978443	circRNA	ENSSSCG00000004199	mRNA
circRNA4565	up	2.73993	0.005023	yes	chr4	87306270	87329009	circRNA	PRKDC	mRNA
circRNA1398	up	1.45878	0.00504041	yes	chr1	60931627	60959765	circRNA	SNX14	mRNA
circRNA4625	up	1.86869	0.00507427	yes	chr3	81760597	81762554	circRNA	ENSSSCG00000027509	mRNA
circRNA2366	up	1.5312	0.00507916	yes	chr13	73174025	73184566	circRNA	ENSSSCG00000011553	mRNA
circRNA5635	down	-2.21834	0.00509309	yes	chr9	102775845	102784706	circRNA	CROT	mRNA
circRNA2432	up	2.79807	0.00510808	yes	chr12	38836060	38864471	circRNA	BCAS3	mRNA
circRNA705	down	-2.43115	0.00510884	yes	chr1	283819938	283824543	circRNA	PTBP3	mRNA
circRNA2664	up	2.63989	0.0051129	yes	chrX	40486596	40503864	circRNA	MED14	mRNA
circRNA6258	up	4.86256	0.00511791	yes	chr10	24486122	24488833	circRNA	TP53BP2	mRNA
circRNA1707	up	3.81611	0.00511905	yes	chr17	3451680	3499007	circRNA	TUSC3	mRNA
circRNA2014	up	3.07993	0.00513128	yes	chr4	134535413	134539888	circRNA	ABCD3	mRNA
circRNA4737	up	4.58118	0.00514386	yes	chr1	57204224	57251784	circRNA	SMAP1	mRNA
circRNA4086	up	2.19776	0.00514409	yes	chr13	31729571	31739707	circRNA	ENSSSCG00000027176	mRNA
circRNA1054	up	3.19389	0.00515563	yes	chr12	23729226	23742062	circRNA	NPEPPS	mRNA
circRNA1864	up	3.54755	0.00517878	yes	chr7	36438654	36472463	circRNA	ENSSSCG00000001549	mRNA
circRNA1140	up	3.0735	0.00523593	yes	chr7	16992242	17106510	circRNA	CDKAL1	mRNA
circRNA2416	up	1.87417	0.00528475	yes	chr12	6047528	6064077	circRNA	NUP85	mRNA
circRNA6573	up	2.62766	0.0052872	yes	chr3	72098587	72124943	circRNA	TET3	mRNA
circRNA5106	down	-1.94123	0.00529163	yes	chr12	17103289	17103460	circRNA	KANSL1	mRNA
circRNA2050	up	3.91396	0.00529245	yes	chr3	84469782	84473271	circRNA	ENSSSCG00000008382	mRNA
circRNA4171	up	1.09016	0.00530401	yes	chr11	76642102	76694131	circRNA	TMTC4	mRNA
circRNA6102	down	-1.32554	0.00536137	yes	chr18	53885608	53885803	circRNA	TNS3	mRNA
circRNA2585	down	-5.06774	0.00538052	yes	chr15	139201406	139211780	circRNA	SERPINE2	mRNA
ciRNA198	up	4.59064	0.00541087	yes	chr3	90740443	90740726	ciRNA	MTIF2	mRNA
circRNA6800	up	2.37885	0.005411	yes	chr13	149670465	149685278	circRNA	GSK3B	mRNA
circRNA4959	up	3.31957	0.00542272	yes	chr8	12659793	12717344	circRNA	LCORL	mRNA
circRNA3746	up	2.883	0.00542688	yes	chr6	99190172	99194221	circRNA	GREB1L	mRNA
circRNA582	up	1.77192	0.00549919	yes	chr6	81212689	81223815	circRNA	ENSSSCG00000003591	mRNA
circRNA3650	up	4.84502	0.00551674	yes	chr14	92425152	92505193	circRNA	CCSER2	mRNA
circRNA4457	up	2.41301	0.00552574	yes	chr6	99098242	99098418	circRNA	GREB1L	mRNA
circRNA1109	up	1.97512	0.00555686	yes	chr14	10511192	10513787	circRNA	DOCK5	mRNA
circRNA4493	up	1.6221	0.00556144	yes	chr5	29892331	29900183	circRNA	MON2	mRNA
circRNA5145	up	3.61282	0.00556181	yes	chr11	56283465	56292661	circRNA	NDFIP2	mRNA
circRNA1634	down	-1.3039	0.00559223	yes	chr12	6259308	6260601	circRNA	CDR2L	mRNA
circRNA2320	down	-1.03249	0.00560356	yes	chr8	88158147	88164007	circRNA	MMAA	mRNA
circRNA2820	up	1.46788	0.0056166	yes	chr1	11314741	11319029	circRNA	SNX9	mRNA
circRNA1538	down	-2.74539	0.00562776	yes	chr8	43597516	43597839	circRNA	KIT	mRNA
circRNA2527	up	2.65248	0.00562976	yes	chr16	3965135	3981856	circRNA	ENSSSCG00000029792	mRNA
circRNA1473	up	3.16275	0.00563749	yes	chr18	21445531	21512785	circRNA	ENSSSCG00000016590	mRNA
circRNA3246	up	1.80961	0.00563867	yes	chr2	17348985	17367528	circRNA	AMBRA1	mRNA
circRNA4179	up	3.00814	0.00564858	yes	chr10	17976426	18149975	circRNA	AKT3	mRNA
circRNA3812	up	4.65544	0.00565106	yes	chr4	88636380	88671024	circRNA	ENSSSCG00000006282	mRNA
circRNA3826	up	1.77773	0.00569192	yes	chr3	6039407	6041764	circRNA	TRRAP	mRNA
circRNA1695	up	1.70893	0.00571354	yes	chr10	50698422	50742685	circRNA	MINDY3	mRNA
circRNA3422	up	3.45983	0.00571367	yes	chr8	38789745	38810850	circRNA	GABRA4	mRNA
circRNA1526	up	2.20783	0.00573035	yes	chr8	1266332	1270239	circRNA	ADD1	mRNA
circRNA144	up	1.93055	0.00573931	yes	chr3	55816207	55817006	circRNA	TBC1D8	mRNA
circRNA4787	up	1.51719	0.00574181	yes	chr1	181043371	181055410	circRNA	DPP8	mRNA
circRNA4184	up	1.05647	0.00574888	yes	chr10	29342271	29362373	circRNA	KDM5B	mRNA
circRNA6107	up	1.81159	0.00575316	yes	chr9	9075665	9101387	circRNA	PAAF1	mRNA
circRNA799	up	4.03131	0.00575527	yes	chr10	24480147	24486223	circRNA	TP53BP2	mRNA
ciRNA145	down	-1.65308	0.00576817	yes	chr2	59462696	59463334	ciRNA	RPL18A	mRNA
circRNA6681	up	2.10113	0.00577796	yes	chr1	249459092	249496380	circRNA	PTAR1	mRNA
circRNA6222	down	-3.61327	0.00580517	yes	chr12	22320498	22321594	circRNA	TOP2A	mRNA
circRNA4955	up	2.83299	0.00582318	yes	chr9	145561550	145612779	circRNA	HHAT	mRNA
circRNA99	up	7.11082	0.00584893	yes	chr4	35844936	35890859	circRNA	ENSSSCG00000006045	mRNA
circRNA6160	down	-3.1691	0.00586529	yes	chr8	117488167	117498361	circRNA	ANK2	mRNA
circRNA414	up	Inf	0.00586668	yes	chr10	5015081	5062138	circRNA	BRINP3	mRNA
circRNA1339	up	1.57484	0.0058801	yes	chr2	29096012	29141373	circRNA	ABTB2	mRNA
circRNA3087	up	1.14726	0.00589839	yes	chr7	94030925	94044160	circRNA	ENSSSCG00000002260	mRNA
circRNA1755	up	5.52996	0.00592436	yes	chr15	111234765	111244798	circRNA	ENSSSCG00000016068	mRNA
circRNA6354	up	2.42296	0.00596487	yes	chr14	31292136	31293688	circRNA	SBNO1	mRNA
circRNA5179	up	3.0451	0.00599595	yes	chr10	38224312	38226874	circRNA	ACO1	mRNA
circRNA4113	up	3.29885	0.00600268	yes	chr13	142562710	142584123	circRNA	DLG1	mRNA
circRNA2506	up	3.74352	0.00606847	yes	chr17	3451680	3495031	circRNA	TUSC3	mRNA
circRNA5317	up	2.29661	0.00609312	yes	chr14	10570599	10574128	circRNA	DOCK5	mRNA
circRNA975	down	-1.06683	0.00612829	yes	chr1	84047500	84048935	circRNA	FOXO3	mRNA
circRNA4931	up	3.89385	0.00615216	yes	chr9	108308170	108359475	circRNA	CACNA2D1	mRNA
circRNA5874	up	1.02785	0.00615495	yes	chr6	148116282	148120523	circRNA	OSBPL9	mRNA
circRNA2537	down	-2.06433	0.00615721	yes	chr16	51418411	51419574	circRNA	MARVELD2	mRNA
circRNA1244	up	3.09521	0.00615796	yes	chr5	105210066	105265163	circRNA	ACSS3	mRNA
circRNA6223	down	-3.39925	0.00620011	yes	chr12	22320498	22323341	circRNA	TOP2A	mRNA
circRNA1033	down	-3.15582	0.00621886	yes	chr13	43392088	43392355	circRNA	DENND6A	mRNA
circRNA588	up	3.72292	0.00623301	yes	chr6	126170489	126212107	circRNA	ENSSSCG00000003773	mRNA
circRNA1607	up	1.45191	0.00623445	yes	chr13	98113084	98146604	circRNA	RNF13	mRNA
circRNA2875	up	2.56621	0.00625304	yes	chr9	14515834	14516044	circRNA	ENSSSCG00000014894	mRNA
circRNA1730	up	4.92497	0.00629181	yes	chr16	34246103	34253246	circRNA	ITGA2	mRNA
circRNA110	up	2.08941	0.00629214	yes	chr4	87318496	87322078	circRNA	PRKDC	mRNA
circRNA1835	up	7.10509	0.00633745	yes	chrX	43367836	43377117	circRNA	MAOB	mRNA
circRNA3852	up	1.85779	0.006356	yes	chr3	84647716	84658865	circRNA	ENSSSCG00000028831	mRNA
circRNA5211	up	2.50426	0.00637236	yes	chr17	43098460	43110584	circRNA	ITCH	mRNA
circRNA1859	up	2.48954	0.00644615	yes	chr7	20415577	20423283	circRNA	MRS2	mRNA
circRNA6878	up	1.6433	0.00646637	yes	chr17	33108518	33122517	circRNA	XRN2	mRNA
circRNA2047	up	2.42191	0.00650954	yes	chr3	76306490	76324375	circRNA	AAK1	mRNA
circRNA4629	up	1.22482	0.00652323	yes	chr3	90568094	90584203	circRNA	PPP4R3B	mRNA
circRNA468	up	1.20747	0.00656729	yes	chr15	79278095	79284066	circRNA	GRB14	mRNA
circRNA2561	up	3.1217	0.00656893	yes	chr15	85415559	85473265	circRNA	ENSSSCG00000015940	mRNA
circRNA3677	up	5.19594	0.00659318	yes	chrX	86132408	86178588	circRNA	ENSSSCG00000012474	mRNA
circRNA4871	up	5.06484	0.00664351	yes	chr18	42657893	42689446	circRNA	DPY19L1	mRNA
circRNA1892	down	-1.53951	0.00666771	yes	chr7	116973936	116975944	circRNA	ZC3H14	mRNA
circRNA404	down	-2.61676	0.00667665	yes	chr11	5189667	5193917	circRNA	PAN3	mRNA
circRNA4250	up	2.45463	0.00671415	yes	chr15	53189660	53200918	circRNA	LRP2BP	mRNA
circRNA5614	down	-2.12106	0.00677764	yes	chr18	9774861	9785846	circRNA	DENND2A	mRNA
circRNA2346	up	2.29967	0.00679262	yes	chr13	19868970	20018550	circRNA	OSBPL10	mRNA
circRNA5986	up	2.05823	0.00682309	yes	chr2	203953	205184	circRNA	TALDO1	mRNA
circRNA624	up	3.71136	0.00683405	yes	chr3	19854335	19856749	circRNA	IL4R	mRNA
circRNA5994	down	-1.00643	0.00685866	yes	chr2	42217045	42219772	circRNA	ENSSSCG00000013351	mRNA
circRNA6841	up	1.5447	0.00687111	yes	chr11	18476605	18479994	circRNA	RCBTB1	mRNA
circRNA3634	up	1.22811	0.00687536	yes	chr14	53600684	53609301	circRNA	MAPK1	mRNA
circRNA5754	up	1.80469	0.00688479	yes	chr15	71703524	71727032	circRNA	ACVR1	mRNA
circRNA3481	up	1.06937	0.00691625	yes	chr13	144391256	144395141	circRNA	ENSSSCG00000026753	mRNA
circRNA3322	up	5.73247	0.00691681	yes	chr1	225509264	225518680	circRNA	HACD4	mRNA
circRNA950	up	4.41535	0.00692496	yes	chr2	28170604	28177404	circRNA	CD44	mRNA
ciRNA69	up	Inf	0.00694957	yes	chrX	46782033	46782287	ciRNA	UBA1	mRNA
circRNA3177	up	2.07494	0.00695653	yes	chr4	85304081	85384327	circRNA	PCMTD1	mRNA
circRNA6973	up	2.70916	0.00695884	yes	chrX	70818283	70833467	circRNA	MAGT1	mRNA
circRNA5558	down	-1.39363	0.00699169	yes	chr2	77617731	77619823	circRNA	CNN2	mRNA
circRNA92	up	3.60037	0.00702732	yes	chr4	1995100	1995728	circRNA	SLC45A4	mRNA
circRNA5437	up	1.1615	0.00703172	yes	chr7	97005367	97118937	circRNA	GPHN	mRNA
circRNA1794	up	1.13715	0.00704448	yes	chr14	53901822	53915641	circRNA	PI4KA	mRNA
circRNA6012	up	2.49939	0.0070658	yes	chr2	87176958	87211265	circRNA	ENSSSCG00000014088	mRNA
circRNA811	up	2.41349	0.00710914	yes	chr17	29783317	29787734	circRNA	SNX5	mRNA
circRNA2986	up	2.14035	0.00711509	yes	chr10	66158459	66175965	circRNA	USP6NL	mRNA
circRNA249	up	5.32929	0.00711768	yes	chr1	287936886	287960703	circRNA	PAPPA	mRNA
circRNA2769	up	1.66519	0.00717535	yes	chr3	45591150	45613329	circRNA	TTL	mRNA
circRNA449	up	2.17493	0.00719627	yes	chr16	21326993	21333952	circRNA	RAI14	mRNA
ciRNA112	up	Inf	0.00721747	yes	chr7	53460776	53461060	ciRNA	ADAMTS7	mRNA
circRNA703	up	1.78115	0.00724879	yes	chr1	269819540	269838836	circRNA	NR4A3	mRNA
circRNA4997	up	Inf	0.00727236	yes	chr8	108954786	108959718	circRNA	KIAA1109	mRNA
circRNA2963	up	3.53001	0.00727281	yes	chr11	14714358	14837488	circRNA	COG6	mRNA
circRNA415	up	Inf	0.00727711	yes	chr10	5015081	5117939	circRNA	BRINP3	mRNA
circRNA5350	up	2.50957	0.00727802	yes	chr14	54627862	54629384	circRNA	HIRA	mRNA
circRNA3116	up	2.00541	0.00729187	yes	chr6	101697609	101745288	circRNA	OSBPL1A	mRNA
circRNA6713	down	-1.51017	0.00729735	yes	chr9	52426901	52428390	circRNA	OAF	mRNA
circRNA6336	up	1.21045	0.00730278	yes	chr15	157081656	157089502	circRNA	RIF1	mRNA
circRNA5518	up	3.6648	0.00731644	yes	chr3	55851993	55852663	circRNA	ENSSSCG00000008171	mRNA
circRNA6200	up	2.32641	0.0073168	yes	chr13	132997365	132999736	circRNA	SENP2	mRNA
circRNA264	up	2.4162	0.00732707	yes	chr18	18686159	18715721	circRNA	MKLN1	mRNA
circRNA3821	up	1.93072	0.00733967	yes	chr4	119330607	119538110	circRNA	CEPT1	mRNA
circRNA6028	up	2.6105	0.00735344	yes	chr1	9094120	9097770	circRNA	ENSSSCG00000004043	mRNA
circRNA645	up	4.11555	0.00737308	yes	chr3	126269305	126280769	circRNA	WDR35	mRNA
circRNA817	up	3.2419	0.00738229	yes	chr16	19086646	19094426	circRNA	ENSSSCG00000016810	mRNA
circRNA5190	up	3.25409	0.00738751	yes	chr10	62692304	62748747	circRNA	PARD3	mRNA
circRNA2581	up	1.74206	0.00739241	yes	chr15	124584175	124720160	circRNA	KANSL1L	mRNA
circRNA5788	down	-2.89537	0.00741932	yes	chr14	149182462	149183284	circRNA	MKI67	mRNA
circRNA796	up	1.30428	0.00743079	yes	chr10	7752694	7769993	circRNA	ENSSSCG00000028407	mRNA
circRNA156	up	1.01156	0.00743217	yes	chr3	100452678	100514126	circRNA	PRKCE	mRNA
circRNA845	up	2.22671	0.00743686	yes	chr14	57778728	57848109	circRNA	RYR2	mRNA
circRNA5052	up	2.23114	0.007439	yes	chr13	91219961	91226772	circRNA	TRPC1	mRNA
circRNA3742	up	2.18954	0.00745219	yes	chr6	81214309	81230045	circRNA	ENSSSCG00000003591	mRNA
circRNA4237	up	2.11422	0.00745537	yes	chr16	54816613	54857726	circRNA	CPEB4	mRNA
circRNA4632	up	2.73407	0.0074615	yes	chr3	102699455	102711553	circRNA	LRPPRC	mRNA
circRNA2163	up	1.04502	0.00748095	yes	chr1	106924970	106964621	circRNA	SMAD2	mRNA
circRNA250	up	5.03416	0.00750715	yes	chr1	288096108	288119399	circRNA	PAPPA	mRNA
circRNA6400	up	2.83616	0.00753561	yes	chrX	114481730	114485312	circRNA	DOCK11	mRNA
circRNA6122	up	3.19352	0.00754682	yes	chr9	78985271	79022424	circRNA	ANKIB1	mRNA
circRNA2107	up	3.84976	0.00757409	yes	chr2	80568943	80577295	circRNA	RUFY1	mRNA
circRNA1622	up	3.17944	0.00758687	yes	chr13	158525065	158563363	circRNA	NECTIN3	mRNA
circRNA4740	down	-3.26941	0.00759673	yes	chr1	72651152	72656373	circRNA	ENSSSCG00000027002	mRNA
circRNA803	up	3.5219	0.00765269	yes	chr10	47097358	47114448	circRNA	ARHGAP12	mRNA
circRNA6386	up	3.16332	0.00765633	yes	chrX	8558016	8581627	circRNA	ARHGAP6	mRNA
circRNA3639	up	2.63214	0.00766777	yes	chr14	60727790	60740114	circRNA	TARBP1	mRNA
circRNA3848	up	1.6737	0.00767966	yes	chr3	76037041	76048403	circRNA	ENSSSCG00000008335	mRNA
circRNA1542	up	2.77572	0.00768879	yes	chr8	58349146	58361703	circRNA	EXOC1	mRNA
circRNA4881	up	3.75809	0.0076892	yes	chr18	59628324	59685316	circRNA	CDK13	mRNA
circRNA252	up	4.15375	0.0077291	yes	chr1	298262412	298397604	circRNA	ENSSSCG00000026555	mRNA
circRNA1870	up	4.74472	0.00774771	yes	chr7	45795221	45803921	circRNA	ENSSSCG00000001709	mRNA
circRNA3416	up	4.85366	0.00775592	yes	chr8	12441715	12443530	circRNA	ENSSSCG00000026232	mRNA
circRNA1336	up	2.40684	0.00778327	yes	chr2	17353231	17366493	circRNA	AMBRA1	mRNA
circRNA6821	up	4.33828	0.00780536	yes	chr12	37230340	37235315	circRNA	VMP1	mRNA
circRNA4621	up	2.95684	0.00781277	yes	chr3	62646869	62650638	circRNA	KCMF1	mRNA
circRNA1643	up	1.6776	0.00781626	yes	chr12	23727465	23728553	circRNA	NPEPPS	mRNA
circRNA1019	up	2.64304	0.0078639	yes	chr8	40509466	40645857	circRNA	ENSSSCG00000008826	mRNA
circRNA265	up	2.51714	0.00795261	yes	chr18	18690198	18715721	circRNA	MKLN1	mRNA
circRNA3458	up	2.12995	0.00802603	yes	chr13	43881970	43885025	circRNA	ENSSSCG00000011471	mRNA
circRNA2114	up	2.45628	0.00803824	yes	chr2	87170920	87204357	circRNA	ENSSSCG00000014088	mRNA
circRNA4619	up	2.98464	0.00803863	yes	chr3	57385109	57402361	circRNA	REV1	mRNA
circRNA1280	up	1.55102	0.00804355	yes	chr4	141816454	141833754	circRNA	SH3GLB1	mRNA
circRNA6836	up	2.47064	0.0081191	yes	chr12	59357665	59397095	circRNA	MAP2K4	mRNA
circRNA20	up	1.82057	0.00813274	yes	chr7	97739664	97746028	circRNA	RDH11	mRNA
circRNA2614	up	1.4377	0.00814747	yes	chr14	43966064	43975774	circRNA	KCTD10	mRNA
circRNA4879	down	-1.25	0.00819435	yes	chr18	52365395	52385888	circRNA	ENSSSCG00000016715	mRNA
circRNA4178	up	3.01015	0.00821359	yes	chr10	17976426	18101825	circRNA	AKT3	mRNA
circRNA4727	up	3.84581	0.00823733	yes	chr1	32473137	32509712	circRNA	HBS1L	mRNA
circRNA1539	up	2.74724	0.00824056	yes	chr8	50518546	50626858	circRNA	RAPGEF2	mRNA
circRNA5572	up	1.41697	0.00825451	yes	chr2	145408564	145427706	circRNA	KLHL3	mRNA
circRNA804	up	2.20097	0.00826203	yes	chr10	47245359	47246341	circRNA	KIF5B	mRNA
circRNA2735	down	-1.27212	0.00828122	yes	chr5	64517551	64518829	circRNA	ENSSSCG00000000644	mRNA
circRNA3947	up	1.51396	0.00828379	yes	chr1	161765502	161781848	circRNA	ENSSSCG00000004857	mRNA
circRNA3000	up	1.74467	0.0083101	yes	chr16	43251568	43282123	circRNA	ZSWIM6	mRNA
circRNA539	down	-2.69273	0.00832342	yes	chrX	21717559	21721310	circRNA	ENSSSCG00000021322	mRNA
circRNA5906	up	2.54326	0.00832346	yes	chr5	79698894	79718761	circRNA	ARID2	mRNA
circRNA2086	up	2.06185	0.00833417	yes	chr2	17353231	17367528	circRNA	AMBRA1	mRNA
circRNA308	up	2.81724	0.00833739	yes	chr8	38783523	38795994	circRNA	GABRA4	mRNA
circRNA1701	up	1.21565	0.00834517	yes	chr10	71294817	71307626	circRNA	GDI2	mRNA
circRNA4808	up	2.16761	0.00835242	yes	chr1	229799248	229975830	circRNA	ENSSSCG00000025613	mRNA
circRNA2	up	Inf	0.00835333	yes	chr7	4991715	4995517	circRNA	DSP	mRNA
circRNA2635	up	1.88573	0.00842095	yes	chr14	113140495	113150343	circRNA	ENSSSCG00000010467	mRNA
circRNA3666	up	2.88566	0.00850626	yes	chrX	14042434	14083380	circRNA	CTPS2	mRNA
circRNA682	up	2.47782	0.00858943	yes	chr1	143955137	143971028	circRNA	GANC	mRNA
circRNA1310	down	-2.11017	0.00859202	yes	chr3	102273355	102275943	circRNA	PREPL	mRNA
circRNA4368	up	2.65465	0.00861384	yes	chr7	36383966	36412083	circRNA	ENSSSCG00000001549	mRNA
circRNA2552	up	3.02428	0.00868171	yes	chr15	55368464	55370232	circRNA	NSD3	mRNA
circRNA559	up	2.14163	0.00871177	yes	chr7	33620864	33628225	circRNA	DST	mRNA
circRNA5139	up	4.0743	0.00871668	yes	chr11	14717311	14835206	circRNA	COG6	mRNA
circRNA6721	down	-3.9506	0.00877479	yes	chr9	98647670	98648601	circRNA	ITGB8	mRNA
circRNA971	up	4.4391	0.00880409	yes	chr1	41713230	41731269	circRNA	ENSSSCG00000021149	mRNA
circRNA711	up	2.0268	0.00880759	yes	chr18	18671313	18701330	circRNA	MKLN1	mRNA
circRNA1193	up	1.31913	0.00884574	yes	chr6	101724150	101745288	circRNA	OSBPL1A	mRNA
circRNA3176	up	2.53333	0.00885552	yes	chr4	81096531	81107008	circRNA	SDCBP	mRNA
circRNA5115	up	4.66933	0.00886526	yes	chr12	37274526	37309293	circRNA	VMP1	mRNA
circRNA5751	up	2.22211	0.00887418	yes	chr15	22750457	22765227	circRNA	ACTR3	mRNA
circRNA2297	up	1.74776	0.00888148	yes	chr8	3290947	3353402	circRNA	TBC1D14	mRNA
circRNA4765	up	3.00766	0.00889878	yes	chr1	134518965	134526927	circRNA	SPPL2A	mRNA
circRNA5358	up	2.99946	0.00891236	yes	chr14	64835671	64858680	circRNA	GALNT2	mRNA
circRNA1749	up	2.0708	0.0089144	yes	chr15	87206136	87215317	circRNA	DYNC1I2	mRNA
circRNA542	up	1.83936	0.00892775	yes	chrX	51844159	51852729	circRNA	HUWE1	mRNA
circRNA2833	up	5.97021	0.00893438	yes	chr1	103180403	103206438	circRNA	CD109	mRNA
circRNA2262	up	1.74853	0.00899578	yes	chr9	83231317	83252558	circRNA	SLC25A13	mRNA
circRNA838	down	-1.6013	0.00901123	yes	chr14	13295667	13298808	circRNA	ZNF395	mRNA
circRNA3089	up	2.51817	0.0090138	yes	chr7	104156049	104163058	circRNA	NEK9	mRNA
circRNA1172	up	1.26559	0.0090373	yes	chr7	118931849	118942907	circRNA	ENSSSCG00000002436	mRNA
circRNA3644	up	2.50132	0.00904249	yes	chr14	68600483	68656990	circRNA	ANK3	mRNA
circRNA2845	up	5.94203	0.00908646	yes	chr1	179091950	179112850	circRNA	CCBE1	mRNA
circRNA3760	up	5.54354	0.00908709	yes	chr6	150846440	150870286	circRNA	SPATA6	mRNA
circRNA6789	up	2.8511	0.00909237	yes	chr13	119214066	119236371	circRNA	PLD1	mRNA
circRNA2214	up	2.72357	0.00911267	yes	chr18	16862119	16876402	circRNA	ENSSSCG00000016544	mRNA
circRNA2211	up	2.69669	0.00913226	yes	chr18	5567767	5570723	circRNA	ENSSSCG00000022734	mRNA
circRNA5660	down	-1.89886	0.00913324	yes	chr8	118376130	118385149	circRNA	AP1AR	mRNA
circRNA4076	up	1.5818	0.00914859	yes	chr8	143249769	143275381	circRNA	WDFY3	mRNA
circRNA3192	up	2.47462	0.00915658	yes	chr4	117945775	117949658	circRNA	ST7L	mRNA
circRNA4960	up	3.19777	0.00916434	yes	chr8	12659793	12705196	circRNA	LCORL	mRNA
circRNA866	up	1.95568	0.00916465	yes	chrX	99100700	99111126	circRNA	FAM199X	mRNA
circRNA790	up	4.06338	0.00919541	yes	chr11	52242608	52244398	circRNA	ENSSSCG00000009464	mRNA
circRNA1317	up	3.79153	0.00921016	yes	chr3	120066344	120085560	circRNA	ENSSSCG00000008575	mRNA
circRNA3709	up	1.53101	0.00921208	yes	chr7	101907799	101928005	circRNA	ENSSSCG00000002333	mRNA
circRNA4162	up	1.24609	0.00922974	yes	chr11	19805267	19851901	circRNA	ITM2B	mRNA
circRNA6409	up	5.56936	0.00923369	yes	chr7	17106407	17252211	circRNA	CDKAL1	mRNA
circRNA5202	up	8.1677	0.00925149	yes	chr17	31430969	31435541	circRNA	ENSSSCG00000007100	mRNA
circRNA3125	up	2.42034	0.00925876	yes	chr6	135590574	135594754	circRNA	ENSSSCG00000003808	mRNA
circRNA6487	down	-3.35274	0.00926472	yes	chr6	154523123	154523400	circRNA	ERI3	mRNA
ciRNA49	up	2.78186	0.00927741	yes	chr6	83591159	83592020	ciRNA	ENSSSCG00000025344	mRNA
circRNA6238	up	4.04397	0.00928106	yes	chr11	14714358	14835206	circRNA	COG6	mRNA
circRNA1974	up	2.58662	0.00928328	yes	chr5	105265060	105277027	circRNA	ACSS3	mRNA
circRNA2908	up	1.94644	0.00930347	yes	chr8	41183979	41216093	circRNA	DCUN1D4	mRNA
circRNA1307	up	3.33926	0.00930994	yes	chr3	92462859	92463890	circRNA	PSME4	mRNA
circRNA699	up	2.87468	0.00931867	yes	chr1	238926488	238930183	circRNA	ENSSSCG00000005194	mRNA
circRNA5097	up	5.90014	0.0093286	yes	chr13	213136578	213140077	circRNA	WRB	mRNA
circRNA6755	up	2.29122	0.00934465	yes	chr8	140242798	140255386	circRNA	PKD2	mRNA
circRNA497	up	2.16228	0.00938774	yes	chr14	10569830	10574128	circRNA	DOCK5	mRNA
circRNA2840	up	1.3273	0.00944812	yes	chr1	144001831	144007016	circRNA	TMEM87A	mRNA
circRNA6835	up	1.81719	0.0094681	yes	chr12	53698948	53728048	circRNA	ENSSSCG00000017895	mRNA
circRNA5005	down	-1.74124	0.00948745	yes	chr8	127235667	127245832	circRNA	ENSSSCG00000026525	mRNA
circRNA2336	up	1.60188	0.0094888	yes	chr8	143262507	143275381	circRNA	WDFY3	mRNA
circRNA736	up	3.09467	0.00950769	yes	chr8	19357559	19380799	circRNA	ENSSSCG00000025315	mRNA
circRNA772	up	2.50616	0.00951106	yes	chr12	15464790	15473342	circRNA	TANC2	mRNA
circRNA5302	up	3.54595	0.00954689	yes	chr15	126139921	126179174	circRNA	ENSSSCG00000016160	mRNA
circRNA3324	up	2.20733	0.00955561	yes	chr1	229799248	229947128	circRNA	ENSSSCG00000025613	mRNA
circRNA306	up	7.28635	0.0095724	yes	chr8	9816450	9826019	circRNA	CPEB2	mRNA
circRNA535	up	Inf	0.00961782	yes	chrX	17024701	17030595	circRNA	MAP3K15	mRNA
circRNA4477	up	2.57375	0.00966765	yes	chr6	146127366	146133714	circRNA	YIPF1	mRNA
circRNA1469	up	1.70322	0.00968294	yes	chr18	18661914	18686351	circRNA	MKLN1	mRNA
circRNA6945	up	3.2851	0.00970543	yes	chr14	81282853	81361983	circRNA	MICU1	mRNA
circRNA4854	up	2.32118	0.0097081	yes	chr18	19616325	19620834	circRNA	ENSSSCG00000027131	mRNA
circRNA1560	down	-1.92218	0.00972657	yes	chr8	110783890	110791848	circRNA	PRDM5	mRNA
circRNA5621	up	2.30094	0.00973238	yes	chr18	44199254	44317450	circRNA	ENSSSCG00000024754	mRNA
circRNA569	up	2.45166	0.00974396	yes	chr7	102315541	102326447	circRNA	PSEN1	mRNA
circRNA3454	up	2.63712	0.00974561	yes	chr13	35652573	35687894	circRNA	RBM6	mRNA
circRNA1236	up	3.41167	0.00974578	yes	chr5	89450455	89471342	circRNA	ENSSSCG00000000884	mRNA
circRNA6425	up	1.41089	0.00977928	yes	chr7	62812462	62830084	circRNA	PTPN9	mRNA
circRNA3247	up	1.86815	0.00979187	yes	chr2	17431134	17447377	circRNA	AMBRA1	mRNA
circRNA6834	up	2.13791	0.00980617	yes	chr12	52771100	52781167	circRNA	KIAA0753	mRNA
circRNA3261	up	4.53942	0.00982019	yes	chr2	77628347	77629314	circRNA	ABCA7	mRNA
circRNA6533	up	2.21968	0.00985112	yes	chr4	106714290	106733675	circRNA	SNX27	mRNA
circRNA5475	down	-1.36381	0.00985435	yes	chr5	8998035	9001360	circRNA	TXN2	mRNA
circRNA2588	up	1.45202	0.00985523	yes	chr15	147691480	147701049	circRNA	ATG16L1	mRNA
circRNA1093	down	-1.83633	0.00985683	yes	chr15	19253545	19263276	circRNA	RAB3GAP1	mRNA
circRNA6434	up	2.45605	0.00986112	yes	chr7	91938950	91956101	circRNA	CHD2	mRNA
circRNA1656	up	1.58679	0.00989335	yes	chr12	50456560	50481892	circRNA	PAFAH1B1	mRNA
circRNA6594	up	2.4003	0.0099077	yes	chr2	27364349	27409648	circRNA	LDLRAD3	mRNA
circRNA1441	up	2.67953	0.00992907	yes	chr1	238906923	238909154	circRNA	ENSSSCG00000005194	mRNA
circRNA1930	up	2.2878	0.00993421	yes	chr6	137394338	137399634	circRNA	ALG6	mRNA
circRNA4884	up	4.48124	0.00999886	yes	chr9	9213011	9219413	circRNA	C2CD3	mRNA
circRNA4810	up	1.29891	0.0100207	yes	chr1	240860923	240943150	circRNA	ENSSSCG00000005198	mRNA
ciRNA126	up	1.94336	0.0100811	yes	chr12	5578854	5579323	ciRNA	H3F3A	mRNA
circRNA5717	up	2.74084	0.0101065	yes	chr10	47064149	47086534	circRNA	ARHGAP12	mRNA
circRNA6256	up	1.87136	0.0101073	yes	chr10	17387726	17396207	circRNA	AHCTF1	mRNA
circRNA3165	down	-2.84186	0.0101123	yes	chr4	19615523	19626323	circRNA	MTBP	mRNA
circRNA285	up	1.15188	0.0101744	yes	chr9	63000517	63011493	circRNA	APLP2	mRNA
circRNA3539	up	Inf	0.0101794	yes	chr10	18627349	18665581	circRNA	ENSSSCG00000010871	mRNA
circRNA4573	up	1.75919	0.010226	yes	chr4	96740134	96776508	circRNA	ENSSSCG00000006346	mRNA
circRNA5927	up	2.48432	0.0102427	yes	chr4	45576146	45595180	circRNA	KIAA1429	mRNA
circRNA2282	up	1.61471	0.0102729	yes	chr9	129718279	129732908	circRNA	ENSSSCG00000015509	mRNA
circRNA4214	up	2.61138	0.0103305	yes	chr17	55230543	55240628	circRNA	ZMYND8	mRNA
circRNA2665	up	1.75015	0.0103412	yes	chrX	40503714	40507872	circRNA	MED14	mRNA
circRNA111	up	3.42077	0.0103595	yes	chr4	102815022	102816499	circRNA	ARHGEF2	mRNA
circRNA5664	down	-3.96221	0.0103597	yes	chr13	75597790	75608947	circRNA	PPARG	mRNA
circRNA5882	down	-1.04641	0.0104289	yes	chr5	6523349	6527766	circRNA	SUN2	mRNA
circRNA1747	up	5.3611	0.010429	yes	chr15	75681177	75693603	circRNA	PSMD14	mRNA
circRNA1803	up	3.0017	0.0104694	yes	chr14	81445743	81469140	circRNA	MICU1	mRNA
circRNA3475	up	4.41732	0.010486	yes	chr13	140206028	140208539	circRNA	OPA1	mRNA
circRNA3126	up	2.752	0.0104899	yes	chr6	138157842	138162629	circRNA	ENSSSCG00000003818	mRNA
circRNA5951	down	-2.54388	0.0105027	yes	chr3	18554061	18554474	circRNA	KIF22	mRNA
circRNA6376	up	1.26945	0.010515	yes	chr14	124422938	124456895	circRNA	SH3PXD2A	mRNA
circRNA1453	down	-2.09397	0.0105179	yes	chr1	297536723	297539752	circRNA	STRBP	mRNA
circRNA877	up	1.40183	0.0105235	yes	chr7	97412257	97414957	circRNA	EIF2S1	mRNA
circRNA4415	up	1.83964	0.0105313	yes	chr6	16636399	16673251	circRNA	SNTB2	mRNA
circRNA6816	up	2.46296	0.0105664	yes	chr12	23727465	23729286	circRNA	NPEPPS	mRNA
circRNA873	up	2.1702	0.0106144	yes	chr7	57926593	57934691	circRNA	PDE8A	mRNA
circRNA2136	up	Inf	0.0106168	yes	chr1	10934588	10947088	circRNA	ENSSSCG00000012314	mRNA
ciRNA208	up	Inf	0.0106637	yes	chr18	55506043	55506269	ciRNA	OGDH	mRNA
circRNA6207	up	2.05302	0.0106904	yes	chr13	190906188	190940782	circRNA	USP25	mRNA
circRNA3819	down	-2.11201	0.0106999	yes	chr4	113753029	113753442	circRNA	ENSSSCG00000006735	mRNA
circRNA6762	up	2.07021	0.0107268	yes	chr8	143375361	143394475	circRNA	WDFY3	mRNA
circRNA6871	up	1.81901	0.0107471	yes	chr10	71751709	71753929	circRNA	ENSSSCG00000028982	mRNA
circRNA6186	up	2.67056	0.0107518	yes	chr13	87119945	87140810	circRNA	ENSSSCG00000021203	mRNA
circRNA6670	up	2.50553	0.0107539	yes	chr1	200871351	200871554	circRNA	NIN	mRNA
circRNA3969	up	2.49213	0.0107604	yes	chr1	269912309	269939970	circRNA	STX17	mRNA
circRNA6873	up	1.82021	0.0107621	yes	chr10	72013472	72015692	circRNA	ENSSSCG00000025277	mRNA
ciRNA54	down	-4.78236	0.0107739	yes	chr3	38897456	38897810	ciRNA	HMOX2	mRNA
circRNA172	up	1.90206	0.0107756	yes	chr2	4159831	4164547	circRNA	ENSSSCG00000021760	mRNA
circRNA1963	up	4.39497	0.0107767	yes	chr5	73984918	74023533	circRNA	SLC2A13	mRNA
circRNA839	up	2.51812	0.0108315	yes	chr14	30058998	30065031	circRNA	SCARB1	mRNA
circRNA529	up	2.85419	0.0108414	yes	chr14	142519572	142542925	circRNA	ENSSSCG00000010698	mRNA
circRNA3447	up	1.11469	0.0108418	yes	chr13	24061768	24066809	circRNA	GOLGA4	mRNA
circRNA4856	up	4.26779	0.010852	yes	chr18	21430442	21479519	circRNA	ENSSSCG00000016590	mRNA
circRNA6899	down	-3.44584	0.010882	yes	chr15	53799652	53800256	circRNA	ENSSSCG00000015802	mRNA
circRNA3418	up	4.31098	0.0109559	yes	chr8	31876392	31947867	circRNA	ENSSSCG00000008787	mRNA
circRNA6469	up	3.08033	0.0109741	yes	chr6	85428674	85430771	circRNA	ENSSSCG00000024887	mRNA
circRNA4892	down	-1.50773	0.0109931	yes	chr9	22403235	22404468	circRNA	ENSSSCG00000014915	mRNA
circRNA2947	up	3.9011	0.0109944	yes	chr12	32369890	32381760	circRNA	MMD	mRNA
circRNA3466	up	2.18678	0.010996	yes	chr13	90919603	90935596	circRNA	XRN1	mRNA
circRNA2907	up	Inf	0.011014	yes	chr8	39573095	39578069	circRNA	CORIN	mRNA
circRNA5706	up	3.92152	0.0110381	yes	chr11	52209155	52216641	circRNA	ENSSSCG00000009464	mRNA
circRNA4329	down	-1.66327	0.011051	yes	chrX	7258915	7271328	circRNA	WWC3	mRNA
circRNA3427	down	-1.01873	0.0110637	yes	chr8	76896146	76911005	circRNA	CCNI	mRNA
circRNA5373	up	2.23675	0.0110643	yes	chr14	108826300	108853441	circRNA	ATAD1	mRNA
circRNA3616	up	2.07416	0.0111532	yes	chr14	7109607	7112991	circRNA	SLC39A14	mRNA
circRNA2611	down	-1.90783	0.011167	yes	chr14	34843126	34863016	circRNA	ENSSSCG00000009837	mRNA
circRNA6156	up	2.12222	0.0112075	yes	chr8	88019043	88039934	circRNA	ZNF827	mRNA
circRNA6011	up	2.99811	0.0112486	yes	chr2	87170920	87193426	circRNA	ENSSSCG00000014088	mRNA
circRNA104	up	1.12567	0.0112559	yes	chr4	43494812	43509860	circRNA	PTDSS1	mRNA
circRNA3768	up	1.739	0.0112636	yes	chr5	17144332	17149930	circRNA	DIP2B	mRNA
circRNA6307	up	2.51753	0.011332	yes	chr15	19218943	19241347	circRNA	RAB3GAP1	mRNA
circRNA4043	up	3.88513	0.0113361	yes	chr9	144041416	144045501	circRNA	TMEM206	mRNA
circRNA4468	up	2.21537	0.0113484	yes	chr6	127528135	127543923	circRNA	ACADM	mRNA
circRNA2641	up	Inf	0.0113545	yes	chr14	120420850	120476345	circRNA	ABCC2	mRNA
circRNA5262	up	2.51105	0.0114373	yes	chr15	34826564	34832166	circRNA	ENSSSCG00000027791	mRNA
circRNA6341	up	2.72729	0.0114555	yes	chr14	10483485	10491663	circRNA	DOCK5	mRNA
circRNA5292	up	1.68658	0.0115141	yes	chr15	116124302	116168588	circRNA	CFLAR	mRNA
circRNA6457	down	-2.19592	0.0115196	yes	chr6	63739623	63742845	circRNA	ENO1	mRNA
circRNA1263	up	2.79442	0.0115294	yes	chr4	97105147	97107945	circRNA	NDUFS2	mRNA
circRNA4733	up	3.135	0.0115599	yes	chr1	45756711	45787500	circRNA	TBC1D32	mRNA
circRNA2479	up	1.70413	0.0115628	yes	chr10	16978306	17000982	circRNA	CDC42BPA	mRNA
circRNA5289	up	1.13337	0.0115642	yes	chr15	106836857	106863127	circRNA	GLS	mRNA
circRNA6870	up	2.52323	0.011603	yes	chr10	71314885	71319443	circRNA	FAM208B	mRNA
circRNA4201	up	1.29179	0.0116047	yes	chr10	71290208	71307626	circRNA	GDI2	mRNA
circRNA4744	up	3.2222	0.0116128	yes	chr1	82103871	82105874	circRNA	ENSSSCG00000004373	mRNA
circRNA2824	up	1.88675	0.0116379	yes	chr1	30904465	30919143	circRNA	ENSSSCG00000026041	mRNA
circRNA2288	up	1.93681	0.0116805	yes	chr9	138853942	138885004	circRNA	SWT1	mRNA
circRNA2910	down	-1.39165	0.0117036	yes	chr8	43586936	43588846	circRNA	KIT	mRNA
circRNA147	up	2.814	0.0117233	yes	chr3	61563969	61569093	circRNA	POLR1A	mRNA
circRNA1895	up	1.8496	0.0117389	yes	chr7	128846360	128849189	circRNA	CDC42BPB	mRNA
circRNA6471	up	3.24925	0.0117444	yes	chr6	86681124	86682472	circRNA	INPP5B	mRNA
circRNA6719	up	2.413	0.0117637	yes	chr9	78959290	78997862	circRNA	ANKIB1	mRNA
circRNA106	up	3.05278	0.0117957	yes	chr4	55349876	55364656	circRNA	WWP1	mRNA
circRNA4972	up	8.31673	0.0118362	yes	chr8	39588373	39598789	circRNA	CORIN	mRNA
circRNA3617	up	2.8859	0.0118464	yes	chr14	10442544	10470943	circRNA	DOCK5	mRNA
circRNA2874	up	1.84626	0.0118486	yes	chr9	8935966	8946866	circRNA	ENSSSCG00000014828	mRNA
circRNA4308	up	Inf	0.0118575	yes	chr14	78234225	78243255	circRNA	VPS26A	mRNA
circRNA1841	up	6.35977	0.0119022	yes	chrX	86132408	86217418	circRNA	ENSSSCG00000012474	mRNA
circRNA4292	down	-3.03296	0.0119391	yes	chr14	30933428	30936038	circRNA	DNAH10	mRNA
circRNA3505	up	1.07312	0.0119486	yes	chr12	23410097	23415351	circRNA	FBXL20	mRNA
circRNA6844	up	1.27673	0.0119793	yes	chr11	26280706	26301669	circRNA	NAA16	mRNA
circRNA4985	up	4.0149	0.0120175	yes	chr8	83143287	83280539	circRNA	ENSSSCG00000009021	mRNA
circRNA2395	down	-2.40121	0.012053	yes	chr13	148316595	148317099	circRNA	IQCB1	mRNA
circRNA2893	up	1.86819	0.0120868	yes	chr9	127878075	127883759	circRNA	RC3H1	mRNA
circRNA545	up	5.61341	0.0120942	yes	chrX	105384438	105388087	circRNA	CH242-17O13.4	mRNA
circRNA814	up	2.75313	0.0121069	yes	chr17	55861545	55861739	circRNA	NCOA3	mRNA
circRNA3213	up	2.04395	0.0121155	yes	chr3	77312222	77352520	circRNA	APLF	mRNA
circRNA4357	up	2.75892	0.0121475	yes	chr7	31345217	31382413	circRNA	LRRC1	mRNA
circRNA4081	up	2.48197	0.0121518	yes	chr13	3122794	3132568	circRNA	ANKRD28	mRNA
circRNA3751	up	1.76083	0.0121558	yes	chr6	132124985	132145007	circRNA	ANKRD13C	mRNA
circRNA1903	up	1.50229	0.0121713	yes	chr6	42175753	42299473	circRNA	ZFP30	mRNA
circRNA5916	up	1.26511	0.0122067	yes	chr4	6908428	6930755	circRNA	CU571095.1	mRNA
circRNA5243	up	1.94237	0.0122096	yes	chr16	36664765	36684156	circRNA	SKIV2L2	mRNA
circRNA3857	up	3.19511	0.0122434	yes	chr3	92468130	92481403	circRNA	PSME4	mRNA
circRNA4738	down	-1.12382	0.012246	yes	chr1	62359384	62378026	circRNA	ZNF292	mRNA
circRNA1356	up	2.53801	0.0122599	yes	chr2	83020290	83026861	circRNA	FAF2	mRNA
circRNA4661	up	1.04149	0.012279	yes	chr3	135247772	135251409	circRNA	YWHAQ	mRNA
circRNA467	down	-1.64398	0.0122882	yes	chr15	61777761	61788609	circRNA	ENSSSCG00000015844	mRNA
circRNA5309	up	2.55021	0.0123239	yes	chr15	146428834	146501442	circRNA	ENSSSCG00000022177	mRNA
circRNA49	up	1.70662	0.0123466	yes	chr6	101010009	101012777	circRNA	NPC1	mRNA
circRNA906	up	1.62735	0.0124412	yes	chr5	70006732	70074979	circRNA	ENSSSCG00000029464	mRNA
circRNA837	up	1.54618	0.0124801	yes	chr14	10538583	10539895	circRNA	DOCK5	mRNA
circRNA6234	up	1.49449	0.0125037	yes	chr12	45341102	45353762	circRNA	NF1	mRNA
circRNA90	up	4.20186	0.0125258	yes	chr5	92464571	92470469	circRNA	FGD6	mRNA
circRNA3945	up	1.0449	0.0125372	yes	chr1	154299284	154339318	circRNA	ENSSSCG00000004814	mRNA
circRNA775	up	2.64024	0.0125566	yes	chr12	37758619	37764713	circRNA	INTS2	mRNA
circRNA1076	up	1.25635	0.0126015	yes	chr10	37486613	37494346	circRNA	BAG1	mRNA
circRNA2693	down	-3.95296	0.0126456	yes	chr7	57815439	57839892	circRNA	CPEB1	mRNA
circRNA3756	up	1.276	0.0126996	yes	chr6	145380018	145384345	circRNA	USP24	mRNA
circRNA5774	down	-2.0554	0.0127049	yes	chr14	44562865	44563444	circRNA	SSH1	mRNA
circRNA437	up	1.80478	0.012714	yes	chr10	72013472	72016488	circRNA	ENSSSCG00000025277	mRNA
circRNA3811	up	2.40159	0.0127492	yes	chr4	87306270	87324546	circRNA	PRKDC	mRNA
circRNA869	up	Inf	0.0127524	yes	chrX	139973194	139977984	circRNA	MTM1	mRNA
circRNA1118	down	-2.94073	0.0127548	yes	chr14	122455302	122456060	circRNA	FBXW4	mRNA
circRNA2350	up	1.01487	0.0127891	yes	chr13	33494610	33497574	circRNA	SCAP	mRNA
circRNA2453	up	Inf	0.0128268	yes	chr11	13305769	13324616	circRNA	TRPC4	mRNA
circRNA3376	up	4.5016	0.0128294	yes	chr9	14240203	14290643	circRNA	NARS2	mRNA
circRNA5885	up	3.07974	0.0128657	yes	chr5	12299779	12301698	circRNA	FBXO7	mRNA
circRNA436	up	1.80082	0.012871	yes	chr10	71751709	71754725	circRNA	ENSSSCG00000028982	mRNA
circRNA359	up	1.1454	0.0129046	yes	chr13	138907625	138940815	circRNA	FGF12	mRNA
circRNA262	up	2.80001	0.0129054	yes	chr18	18641519	18675443	circRNA	MKLN1	mRNA
circRNA3596	up	2.42394	0.0129067	yes	chr15	63784631	63790349	circRNA	ENSSSCG00000015853	mRNA
circRNA60	down	-1.65561	0.0130047	yes	chr5	938171	940627	circRNA	ENSSSCG00000024864	mRNA
circRNA494	up	1.19227	0.0130416	yes	chr14	10462923	10470943	circRNA	DOCK5	mRNA
circRNA1467	up	3.79413	0.0130655	yes	chr18	17099495	17146166	circRNA	CHCHD3	mRNA
circRNA4965	up	2.68365	0.013082	yes	chr8	32587989	32615109	circRNA	UBE2K	mRNA
circRNA4896	up	4.93352	0.0130851	yes	chr9	36642256	36654059	circRNA	CEP126	mRNA
circRNA983	up	5.42162	0.0130906	yes	chr1	205474830	205481309	circRNA	KTN1	mRNA
circRNA6026	up	1.96057	0.013134	yes	chr2	145408564	145458183	circRNA	KLHL3	mRNA
circRNA5615	down	-2.72111	0.0132	yes	chr18	10187954	10192854	circRNA	ENSSSCG00000016502	mRNA
circRNA4354	up	4.36937	0.0132171	yes	chr7	17252066	17311662	circRNA	CDKAL1	mRNA
circRNA4198	up	3.07021	0.0133145	yes	chr10	63281102	63283334	circRNA	CUL2	mRNA
ciRNA129	down	-1.77208	0.0133187	yes	chrX	140190024	140190344	ciRNA	ENSSSCG00000012745	mRNA
circRNA1773	up	2.67502	0.0133234	yes	chr14	30058998	30062418	circRNA	SCARB1	mRNA
circRNA1122	down	-1.30802	0.0133675	yes	chrX	19232020	19233575	circRNA	MBTPS2	mRNA
circRNA1532	up	1.76115	0.0133805	yes	chr8	39388465	39390036	circRNA	ATP10D	mRNA
circRNA4296	up	4.1295	0.0133931	yes	chr14	41921180	41933480	circRNA	ENSSSCG00000025579	mRNA
circRNA1481	up	1.66492	0.0133945	yes	chr18	31040615	31067701	circRNA	ENSSSCG00000016629	mRNA
circRNA2809	up	3.33929	0.0134661	yes	chr2	104498556	104511554	circRNA	ENSSSCG00000014159	mRNA
circRNA1988	up	1.86358	0.0134691	yes	chr4	51356571	51369556	circRNA	OSGIN2	mRNA
circRNA4161	up	3.97738	0.0134953	yes	chr11	19732646	19744523	circRNA	RB1	mRNA
circRNA6025	up	2.17309	0.0135379	yes	chr2	145388052	145458183	circRNA	KLHL3	mRNA
circRNA4691	up	6.23111	0.0135441	yes	chr2	86103896	86111828	circRNA	COL4A3BP	mRNA
circRNA6111	up	2.4795	0.0135441	yes	chr9	19227201	19232187	circRNA	PCF11	mRNA
circRNA6426	up	1.39466	0.0135443	yes	chr7	62827072	62836071	circRNA	PTPN9	mRNA
circRNA3618	up	2.99713	0.013567	yes	chr14	10612603	10635146	circRNA	KCTD9	mRNA
circRNA4310	up	3.36067	0.0136066	yes	chr14	81297022	81361983	circRNA	MICU1	mRNA
circRNA2441	up	2.17401	0.0136446	yes	chr12	50129043	50143884	circRNA	ENSSSCG00000017826	mRNA
circRNA3067	up	2.0682	0.0136482	yes	chrX	17765641	17774677	circRNA	RPS6KA3	mRNA
circRNA1164	up	1.68279	0.0136795	yes	chr7	97005367	97058377	circRNA	GPHN	mRNA
circRNA310	up	2.70801	0.0137245	yes	chr8	40509466	40646867	circRNA	ENSSSCG00000008826	mRNA
circRNA1960	up	2.14722	0.0137318	yes	chr5	70515829	70565956	circRNA	ERC1	mRNA
circRNA5066	up	3.17529	0.0137467	yes	chr13	119216629	119236371	circRNA	PLD1	mRNA
circRNA2553	down	-2.49516	0.0137571	yes	chr15	61777761	61782824	circRNA	ENSSSCG00000015844	mRNA
circRNA5195	up	1.6599	0.0138576	yes	chr10	75673703	75674446	circRNA	LARP4B	mRNA
circRNA1535	up	6.38785	0.013861	yes	chr8	39732043	39748311	circRNA	CORIN	mRNA
circRNA6891	up	2.75602	0.0138658	yes	chr16	37509996	37511757	circRNA	IL6ST	mRNA
circRNA3160	up	2.43931	0.0138986	yes	chr5	105276876	105306144	circRNA	ACSS3	mRNA
circRNA3138	up	2.73611	0.0139115	yes	chr5	14247237	14269491	circRNA	NUAK1	mRNA
circRNA4268	up	1.80575	0.0139431	yes	chr15	124564208	124720160	circRNA	KANSL1L	mRNA
circRNA3028	up	2.96926	0.0140227	yes	chr14	10442544	10463058	circRNA	DOCK5	mRNA
circRNA2837	down	-2.16199	0.0140305	yes	chr1	124875218	124884580	circRNA	MYO1E	mRNA
circRNA2227	up	1.93163	0.0140808	yes	chr18	41996051	42017561	circRNA	SEPT7	mRNA
circRNA1112	up	2.75853	0.0140997	yes	chr14	30062323	30067011	circRNA	SCARB1	mRNA
circRNA1533	up	7.71126	0.0141342	yes	chr8	39593744	39598789	circRNA	CORIN	mRNA
circRNA3411	up	2.3395	0.0141739	yes	chr9	144062171	144093904	circRNA	PPP2R5A	mRNA
circRNA4649	up	2.74936	0.0141832	yes	chr3	126256536	126259226	circRNA	WDR35	mRNA
circRNA1492	down	-2.2323	0.0141895	yes	chr9	8237835	8242946	circRNA	FCHSD2	mRNA
circRNA1004	up	2.15553	0.0141939	yes	chr9	22123762	22133076	circRNA	ENSSSCG00000014913	mRNA
circRNA3717	up	1.10309	0.0142217	yes	chr7	129860024	129888413	circRNA	PPP2R5C	mRNA
circRNA1897	up	2.83415	0.0142287	yes	chr6	12643904	12656894	circRNA	ENSSSCG00000020668	mRNA
circRNA6359	up	1.36465	0.0143153	yes	chr14	43945222	43954743	circRNA	UBE3B	mRNA
circRNA1884	down	-2.27334	0.0143485	yes	chr7	92763263	92796047	circRNA	SLCO3A1	mRNA
circRNA3072	up	1.77041	0.01435	yes	chrX	139963482	139984891	circRNA	MTM1	mRNA
circRNA4772	down	-1.17513	0.0143598	yes	chr1	145435888	145438147	circRNA	INO80	mRNA
circRNA6943	up	1.24409	0.0143702	yes	chr14	71895250	71901340	circRNA	JMJD1C	mRNA
circRNA1410	up	1.25792	0.0144134	yes	chr1	108448292	108449692	circRNA	RPL17	mRNA
circRNA3980	down	-2.0162	0.0144242	yes	chr1	305174205	305175146	circRNA	NUP214	mRNA
circRNA4363	up	2.95989	0.0144348	yes	chr7	33537875	33563523	circRNA	DST	mRNA
circRNA2683	up	1.73537	0.0144482	yes	chr7	82092	105997	circRNA	EXOC2	mRNA
circRNA4730	up	2.85085	0.0144905	yes	chr1	45701230	45805070	circRNA	TBC1D32	mRNA
circRNA4010	up	4.67735	0.0144957	yes	chr9	11210975	11228318	circRNA	ENSSSCG00000022902	mRNA
ciRNA8	up	1.35667	0.0145682	yes	chr5	64079531	64081172	ciRNA	YBX3	mRNA
ciRNA21	up	3.94725	0.0145826	yes	chr16	18898517	19147177	ciRNA	PDZD2	mRNA
circRNA3790	up	3.58279	0.014639	yes	chr4	2707998	2857963	circRNA	TRAPPC9	mRNA
circRNA2462	up	1.6102	0.014657	yes	chr11	53838492	53854788	circRNA	MYCBP2	mRNA
circRNA6846	up	4.39439	0.0146581	yes	chr11	52212325	52234803	circRNA	ENSSSCG00000009464	mRNA
circRNA6937	up	3.13208	0.0146824	yes	chr14	58823773	58827050	circRNA	HEATR1	mRNA
circRNA3542	up	1.25264	0.0147113	yes	chr10	29342271	29364146	circRNA	KDM5B	mRNA
circRNA4219	up	4.51095	0.0147295	yes	chr16	19086646	19127644	circRNA	ENSSSCG00000016810	mRNA
circRNA3303	up	3.05902	0.0147507	yes	chr1	126926296	126936954	circRNA	CH242-58J12.2	mRNA
circRNA6758	up	2.48211	0.0147611	yes	chr8	141448485	141450376	circRNA	PTPN13	mRNA
circRNA1057	up	3.33428	0.014767	yes	chr12	37228113	37235315	circRNA	VMP1	mRNA
circRNA31	down	-4.31754	0.0148272	yes	chr6	4219100	4219948	circRNA	ZDHHC7	mRNA
ciRNA135	up	2.31073	0.0148379	yes	chr6	58097466	58097898	ciRNA	INTS11	mRNA
circRNA3151	up	2.47326	0.0148907	yes	chr5	76327567	76358338	circRNA	PPHLN1	mRNA
circRNA5741	up	1.60492	0.0149191	yes	chr16	22554303	22557643	circRNA	NADK2	mRNA
circRNA3836	up	1.19201	0.0149283	yes	chr3	39564463	39770346	circRNA	CREBBP	mRNA
circRNA406	up	4.33249	0.0149298	yes	chr11	52209155	52244398	circRNA	ENSSSCG00000009464	mRNA
circRNA1408	up	1.51861	0.0149467	yes	chr1	97905979	97924771	circRNA	ENSSSCG00000004473	mRNA
circRNA685	up	1.01469	0.0149585	yes	chr1	153581998	153586599	circRNA	IGF1R	mRNA
circRNA4757	up	2.97915	0.014982	yes	chr1	113957632	114031576	circRNA	MBD2	mRNA
circRNA1120	up	4.4955	0.0150125	yes	chr14	132256486	132256940	circRNA	PDCD4	mRNA
circRNA4941	up	1.89939	0.0150278	yes	chr9	124454928	124525558	circRNA	TPK1	mRNA
circRNA213	down	-3.84685	0.0150289	yes	chr1	62359384	62362228	circRNA	ZNF292	mRNA
circRNA3190	down	-2.12561	0.0150614	yes	chr4	117850214	117851465	circRNA	RHOC	mRNA
circRNA1311	up	2.10746	0.0151624	yes	chr3	102960417	102980907	circRNA	ENSSSCG00000028599	mRNA
circRNA75	up	1.10348	0.0152681	yes	chr5	50996616	51000839	circRNA	ENSSSCG00000000555	mRNA
circRNA5945	down	-1.99704	0.0152682	yes	chr4	142854258	142857414	circRNA	ZNHIT6	mRNA
circRNA5694	up	1.86046	0.015309	yes	chr12	16036543	16046573	circRNA	TLK2	mRNA
circRNA5412	down	-1.79811	0.0153186	yes	chrX	64632848	64633637	circRNA	SNX12	mRNA
circRNA6187	up	1.83798	0.0153236	yes	chr13	89609751	89626678	circRNA	SLC25A36	mRNA
circRNA1659	up	2.11778	0.0154515	yes	chr12	59263043	59264013	circRNA	ZNF18	mRNA
circRNA4581	up	4.53198	0.0154823	yes	chr4	112891023	112900992	circRNA	GDAP2	mRNA
circRNA3070	up	1.2538	0.015487	yes	chrX	73952719	74010804	circRNA	CH242-123K13.1	mRNA
circRNA1780	up	2.40661	0.0155261	yes	chr14	37732669	37749858	circRNA	FBXW8	mRNA
circRNA918	up	1.2254	0.0155272	yes	chr4	106709011	106719435	circRNA	SNX27	mRNA
circRNA205	up	3.05427	0.0155303	yes	chr1	13627236	13632958	circRNA	ENSSSCG00000004065	mRNA
circRNA2691	up	2.57546	0.0155329	yes	chr7	39021067	39051414	circRNA	ENSSSCG00000030073	mRNA
circRNA3830	up	1.98208	0.0155736	yes	chr3	18764315	18764860	circRNA	RABEP2	mRNA
circRNA371	up	1.44837	0.0156176	yes	chr13	216680032	216687050	circRNA	HSF2BP	mRNA
circRNA1352	up	Inf	0.0156719	yes	chr2	71145161	71148100	circRNA	MYO1F	mRNA
circRNA6725	up	3.5139	0.015719	yes	chr9	114857804	114861897	circRNA	ORC5	mRNA
circRNA1500	up	4.87812	0.0157228	yes	chr9	77643009	77725461	circRNA	CDK14	mRNA
ciRNA104	down	-1.9634	0.0157356	yes	chr12	49604113	49604271	ciRNA	ENSSSCG00000030707	mRNA
circRNA5873	up	1.13767	0.0157645	yes	chr6	147612968	147657973	circRNA	ZFYVE9	mRNA
circRNA6108	down	-2.98837	0.015774	yes	chr9	12373356	12385367	circRNA	MYO7A	mRNA
circRNA2037	up	1.03095	0.0158459	yes	chr3	42032747	42066875	circRNA	ENSSSCG00000022963	mRNA
circRNA1160	up	1.84139	0.015862	yes	chr7	80416946	80417483	circRNA	ENSSSCG00000002003	mRNA
circRNA1534	up	Inf	0.0158928	yes	chr8	39666147	39689621	circRNA	CORIN	mRNA
circRNA5160	up	1.47244	0.0158959	yes	chr10	7647790	7656478	circRNA	ENSSSCG00000010811	mRNA
circRNA6393	up	2.53667	0.0159478	yes	chrX	77199964	77219590	circRNA	RPS6KA6	mRNA
circRNA4766	up	1.47148	0.0159974	yes	chr1	136203228	136275220	circRNA	GALK2	mRNA
circRNA5338	up	Inf	0.0160098	yes	chr14	42122321	42123153	circRNA	NAA25	mRNA
circRNA4009	down	-1.7542	0.0160169	yes	chr9	10858134	10859084	circRNA	GDPD5	mRNA
circRNA428	up	2.48941	0.0160574	yes	chr10	47067162	47086534	circRNA	ARHGAP12	mRNA
circRNA5890	up	1.61295	0.0161717	yes	chr5	17144332	17157307	circRNA	DIP2B	mRNA
circRNA2164	up	2.89695	0.0162099	yes	chr1	110399205	110405783	circRNA	ME2	mRNA
circRNA2863	up	3.33665	0.0163185	yes	chr1	305871001	305934515	circRNA	MED27	mRNA
circRNA1530	up	1.58962	0.0163329	yes	chr8	32349317	32367679	circRNA	UGDH	mRNA
circRNA2966	up	4.50411	0.0163658	yes	chr11	52234684	52244398	circRNA	ENSSSCG00000009464	mRNA
circRNA4000	up	2.31555	0.0163695	yes	chr18	42195826	42211071	circRNA	ENSSSCG00000027389	mRNA
circRNA21	up	1.3152	0.0163777	yes	chr7	97744029	97746028	circRNA	RDH11	mRNA
circRNA1176	down	-1.10097	0.0164014	yes	chr6	4228837	4232617	circRNA	ZDHHC7	mRNA
circRNA2281	down	-3.70567	0.0164442	yes	chr9	126535284	126540927	circRNA	ENSSSCG00000015485	mRNA
circRNA2725	up	2.40406	0.0164463	yes	chr6	147629916	147657973	circRNA	ZFYVE9	mRNA
circRNA103	up	1.05877	0.0164576	yes	chr4	42001869	42012095	circRNA	LAPTM4B	mRNA
circRNA1637	up	2.04485	0.0164606	yes	chr12	13502996	13507076	circRNA	PRKCA	mRNA
circRNA2349	up	1.60336	0.0164791	yes	chr13	33174778	33184216	circRNA	SETD2	mRNA
circRNA1801	up	2.91029	0.0165021	yes	chr14	78244907	78250994	circRNA	VPS26A	mRNA
circRNA2185	up	1.83295	0.0165195	yes	chr1	200310792	200334231	circRNA	SOS2	mRNA
circRNA3034	up	1.4848	0.0165297	yes	chr14	36777586	36784050	circRNA	WSB2	mRNA
circRNA4295	up	1.25738	0.0165555	yes	chr14	37543258	37553316	circRNA	FBXO21	mRNA
circRNA1711	up	4.18452	0.0165632	yes	chr17	18910858	18925284	circRNA	TMX4	mRNA
circRNA235	down	-1.11055	0.0165646	yes	chr1	202609214	202611659	circRNA	PSMC6	mRNA
circRNA1050	up	2.8592	0.0166324	yes	chr12	17069503	17103460	circRNA	KANSL1	mRNA
circRNA69	up	1.81272	0.0166547	yes	chr5	9128682	9133379	circRNA	MYH9	mRNA
circRNA2708	up	6.26715	0.0166609	yes	chr6	7482063	7485302	circRNA	GAN	mRNA
circRNA4760	down	-1.07548	0.0168008	yes	chr1	124801758	124816635	circRNA	MYO1E	mRNA
circRNA2056	up	1.03252	0.0168087	yes	chr3	104182825	104199715	circRNA	EML4	mRNA
circRNA1110	up	2.70417	0.0168244	yes	chr14	13485087	13486104	circRNA	FZD3	mRNA
circRNA6445	up	7.61897	0.0168417	yes	chr6	7491143	7493909	circRNA	GAN	mRNA
circRNA907	up	1.65982	0.016875	yes	chr5	79973442	79983003	circRNA	SLC38A1	mRNA
circRNA5573	up	1.40084	0.0168993	yes	chr1	11280891	11284220	circRNA	SNX9	mRNA
circRNA2422	up	2.19288	0.0169136	yes	chr12	17059096	17085916	circRNA	KANSL1	mRNA
circRNA910	up	1.24651	0.0169245	yes	chr4	41090877	41115480	circRNA	STK3	mRNA
circRNA1079	down	-2.25146	0.0169483	yes	chr10	50698422	50702358	circRNA	MINDY3	mRNA
circRNA4394	up	2.33525	0.0169488	yes	chr7	100807368	100813750	circRNA	PCNX1	mRNA
circRNA5905	up	2.56796	0.0169767	yes	chr5	79656879	79666579	circRNA	ARID2	mRNA
circRNA2221	up	3.65123	0.0170531	yes	chr18	21408481	21479519	circRNA	ENSSSCG00000016590	mRNA
circRNA6925	up	3.81824	0.0170939	yes	chr14	30066845	30080315	circRNA	SCARB1	mRNA
circRNA2062	up	1.39112	0.0171064	yes	chr3	119765882	119773500	circRNA	HADHA	mRNA
circRNA5578	up	1.90506	0.0171478	yes	chr1	93205195	93234764	circRNA	ME1	mRNA
circRNA3577	up	2.08529	0.0172315	yes	chr16	36664765	36698971	circRNA	SKIV2L2	mRNA
circRNA701	up	3.32733	0.0173045	yes	chr1	242716644	242718436	circRNA	JAK2	mRNA
circRNA5337	up	4.61249	0.0173374	yes	chr14	41908577	41933480	circRNA	ENSSSCG00000025579	mRNA
circRNA301	up	5.75481	0.0173455	yes	chr9	143423352	143424019	circRNA	VASH2	mRNA
circRNA4798	down	-1.56092	0.0173513	yes	chr1	215806594	215808363	circRNA	SYNE2	mRNA
circRNA118	down	-2.86735	0.0173825	yes	chr4	109178815	109179026	circRNA	ENSSSCG00000025632	mRNA
circRNA1146	up	3.11963	0.0173836	yes	chr7	36582514	36591723	circRNA	SRPK1	mRNA
circRNA1501	up	1.66415	0.0174352	yes	chr9	79015624	79031079	circRNA	ANKIB1	mRNA
circRNA4338	up	4.00852	0.0174513	yes	chrX	46504189	46515564	circRNA	JADE3	mRNA
circRNA4416	up	1.65677	0.017554	yes	chr6	26048730	26050407	circRNA	ENSSSCG00000027470	mRNA
circRNA1383	up	1.73471	0.0175573	yes	chr2	154312784	154318402	circRNA	TCERG1	mRNA
circRNA203	up	6.34032	0.0175679	yes	chr2	155145014	155148789	circRNA	ENSSSCG00000021111	mRNA
circRNA3133	up	2.39444	0.0176054	yes	chr6	152386478	152398188	circRNA	MKNK1	mRNA
circRNA1029	up	Inf	0.0176069	yes	chr13	15502088	15502750	circRNA	SLC4A7	mRNA
circRNA802	up	3.07763	0.0176095	yes	chr10	47064149	47093826	circRNA	ARHGAP12	mRNA
circRNA5645	up	2.61049	0.0176163	yes	chr8	32717281	32728155	circRNA	PDS5A	mRNA
circRNA1962	up	1.45419	0.0176765	yes	chr5	72062877	72095416	circRNA	BCL2L13	mRNA
circRNA1782	up	3.73589	0.0176846	yes	chr14	37745225	37770325	circRNA	FBXW8	mRNA
circRNA3698	up	1.0193	0.0176954	yes	chr7	65449058	65451703	circRNA	HEXA	mRNA
circRNA4951	up	1.90486	0.0177092	yes	chr9	137428472	137433718	circRNA	RGL1	mRNA
circRNA4949	up	5.51523	0.0177425	yes	chr9	133041960	133048234	circRNA	NPHS2	mRNA
circRNA375	up	1.12647	0.0177502	yes	chr12	3360599	3361516	circRNA	USP36	mRNA
circRNA6561	up	2.18555	0.0177744	yes	chr3	43045786	43048981	circRNA	ENSSSCG00000024292	mRNA
circRNA282	up	2.6309	0.0177762	yes	chr9	40778851	40785836	circRNA	ENSSSCG00000025606	mRNA
circRNA6372	down	-3.57867	0.0177835	yes	chr14	113753228	113757730	circRNA	KIF11	mRNA
circRNA2486	up	5.6373	0.0177854	yes	chr10	21948253	21969195	circRNA	ENSSSCG00000010886	mRNA
circRNA5576	up	1.97193	0.0177932	yes	chr1	40737383	40767556	circRNA	TRMT11	mRNA
circRNA5336	up	5.62326	0.0178429	yes	chr14	41908577	41926433	circRNA	ENSSSCG00000025579	mRNA
circRNA6227	up	2.94365	0.0178644	yes	chr12	36520273	36544644	circRNA	TRIM37	mRNA
circRNA1970	up	2.38653	0.0178927	yes	chr5	89540810	89552133	circRNA	ENSSSCG00000000884	mRNA
circRNA3937	up	1.53269	0.0179102	yes	chr1	134599618	134607972	circRNA	TRPM7	mRNA
circRNA3553	up	1.68771	0.0179474	yes	chr10	75674306	75691485	circRNA	LARP4B	mRNA
circRNA4636	up	1.7096	0.0179783	yes	chr3	109719098	109745406	circRNA	HEATR5B	mRNA
circRNA3323	up	1.42154	0.0179894	yes	chr1	227165198	227186649	circRNA	DENND4C	mRNA
circRNA2324	up	Inf	0.0180082	yes	chr8	108364117	108386252	circRNA	SPATA5	mRNA
circRNA1702	up	1.9537	0.0180136	yes	chr10	71751709	71756456	circRNA	ENSSSCG00000028982	mRNA
circRNA1703	up	1.95439	0.0180167	yes	chr10	72013472	72018219	circRNA	ENSSSCG00000025277	mRNA
circRNA531	down	-3.04281	0.018035	yes	chr14	145833236	145834086	circRNA	ZRANB1	mRNA
circRNA4190	up	2.13675	0.0180512	yes	chr10	44178149	44178913	circRNA	WAC	mRNA
circRNA1660	up	1.72077	0.0181115	yes	chr12	59331765	59366879	circRNA	MAP2K4	mRNA
circRNA1399	up	1.39005	0.0181295	yes	chr1	60945904	60958863	circRNA	SNX14	mRNA
circRNA617	up	11.9183	0.018156	yes	chr4	122098353	122109225	circRNA	SLC25A24	mRNA
circRNA212	up	1.35803	0.018173	yes	chr1	60938694	60959765	circRNA	SNX14	mRNA
circRNA2032	up	1.03656	0.0181834	yes	chr3	18519549	18521420	circRNA	MVP	mRNA
circRNA4051	up	2.3535	0.0182169	yes	chr8	32717281	32731617	circRNA	PDS5A	mRNA
circRNA3233	up	2.74967	0.0182228	yes	chr3	125921425	125927436	circRNA	PUM2	mRNA
circRNA5976	up	1.14677	0.0182336	yes	chr3	114326822	114375867	circRNA	MEMO1	mRNA
circRNA3770	down	-1.34331	0.0182584	yes	chr5	23680116	23684128	circRNA	PTGES3	mRNA
circRNA6952	up	2.11116	0.0182656	yes	chr14	113263792	113310103	circRNA	CPEB3	mRNA
circRNA1505	up	3.32699	0.0182706	yes	chr9	93227242	93235815	circRNA	ENSSSCG00000015356	mRNA
circRNA1414	up	1.4141	0.0182837	yes	chr1	132344010	132347527	circRNA	MYO5A	mRNA
circRNA6849	up	2.25829	0.0183217	yes	chr11	75017381	75032555	circRNA	DOCK9	mRNA
circRNA5624	down	-1.68904	0.0183508	yes	chr9	7354695	7354811	circRNA	NUMA1	mRNA
circRNA3076	up	4.43398	0.0184761	yes	chr7	16472245	16480237	circRNA	MBOAT1	mRNA
circRNA6396	down	-1.12292	0.0184964	yes	chrX	109516554	109520890	circRNA	PLS3	mRNA
circRNA4063	up	2.27358	0.0185372	yes	chr8	82124673	82183826	circRNA	ENSSSCG00000020717	mRNA
circRNA4319	up	Inf	0.0185448	yes	chr14	116213896	116227139	circRNA	ENSSSCG00000010488	mRNA
circRNA566	up	1.30537	0.0185452	yes	chr7	73073215	73081439	circRNA	HEATR5A	mRNA
circRNA4275	up	2.7622	0.0185476	yes	chr15	144536848	144564872	circRNA	ENSSSCG00000016258	mRNA
circRNA1977	up	1.93165	0.0185735	yes	chr4	2691054	2708122	circRNA	TRAPPC9	mRNA
circRNA5923	down	-7.66975	0.0185813	yes	chr4	39244235	39276176	circRNA	SNX31	mRNA
circRNA4375	up	3.84369	0.0186166	yes	chr7	53515534	53516953	circRNA	ENSSSCG00000001767	mRNA
circRNA2957	down	-1.03031	0.0186243	yes	chr12	56318210	56324020	circRNA	ENSSSCG00000017986	mRNA
circRNA3602	up	2.67023	0.0186407	yes	chr15	85345503	85364566	circRNA	ENSSSCG00000015939	mRNA
circRNA1101	up	7.35232	0.0186723	yes	chr15	111219789	111234859	circRNA	ENSSSCG00000016068	mRNA
circRNA5448	up	1.99489	0.0186936	yes	chr6	64570542	64580982	circRNA	KIF1B	mRNA
circRNA3465	up	1.77537	0.0187374	yes	chr13	87105659	87113346	circRNA	ENSSSCG00000021203	mRNA
circRNA5159	up	1.30042	0.0187587	yes	chr10	7643479	7667774	circRNA	ENSSSCG00000010811	mRNA
circRNA808	up	1.45267	0.018801	yes	chr10	71290208	71294951	circRNA	GDI2	mRNA
ciRNA124	up	1.58781	0.0188023	yes	chr12	90272	93074	ciRNA	NARF	mRNA
circRNA1347	up	4.0106	0.0188092	yes	chr2	49335255	49340140	circRNA	ENSSSCG00000013397	mRNA
circRNA2261	up	1.23602	0.0188492	yes	chr9	81539754	81544896	circRNA	CASD1	mRNA
circRNA4641	up	2.82633	0.0188726	yes	chr3	114039113	114078537	circRNA	BIRC6	mRNA
circRNA3209	up	1.75509	0.0189499	yes	chr3	61535809	61537526	circRNA	POLR1A	mRNA
circRNA3361	up	1.48312	0.0190427	yes	chr18	33305187	33342656	circRNA	MDFIC	mRNA
circRNA6514	up	3.6221	0.0190694	yes	chr5	86854716	86859993	circRNA	UTP20	mRNA
circRNA677	up	5.52276	0.0190739	yes	chr1	110355174	110359342	circRNA	ME2	mRNA
circRNA3348	up	1.60661	0.0190789	yes	chr18	9569859	9622572	circRNA	BRAF	mRNA
circRNA4512	up	1.38713	0.0191129	yes	chr5	72062877	72100028	circRNA	BCL2L13	mRNA
circRNA1003	up	2.34844	0.0191354	yes	chr9	18942616	18948522	circRNA	PRCP	mRNA
circRNA4004	down	-1.16195	0.0191568	yes	chr18	52306773	52369658	circRNA	ENSSSCG00000016715	mRNA
circRNA6110	up	1.06856	0.0191719	yes	chr9	13674798	13699408	circRNA	ENSSSCG00000014884	mRNA
circRNA2813	up	2.2199	0.0191738	yes	chr2	125146030	125180148	circRNA	COMMD10	mRNA
circRNA5975	up	1.58023	0.0191763	yes	chr3	109761586	109774507	circRNA	HEATR5B	mRNA
circRNA269	down	-2.14367	0.0192681	yes	chr18	43942640	43945974	circRNA	ENSSSCG00000016667	mRNA
circRNA4001	up	1.89483	0.0192924	yes	chr18	42195826	42207089	circRNA	ENSSSCG00000027389	mRNA
circRNA719	up	1.25319	0.0193199	yes	chr9	9757438	9777995	circRNA	ENSSSCG00000027506	mRNA
circRNA4117	up	2.93765	0.0193762	yes	chr13	147693651	147694176	circRNA	KPNA1	mRNA
circRNA5957	up	1.23528	0.0193938	yes	chr3	47969752	47989929	circRNA	NPHP1	mRNA
circRNA1111	up	1.54937	0.0194539	yes	chr14	24797606	24819269	circRNA	EP400	mRNA
circRNA575	up	3.25567	0.0194559	yes	chr6	4428549	4458663	circRNA	CRISPLD2	mRNA
circRNA1178	down	-3.58516	0.0194616	yes	chr6	32376629	32383981	circRNA	PHKB	mRNA
circRNA3279	up	2.0893	0.0194951	yes	chr2	149779440	149781590	circRNA	RNF14	mRNA
circRNA4502	up	2.90573	0.0195818	yes	chr5	50627413	50631015	circRNA	ENSSSCG00000000555	mRNA
circRNA6919	up	3.13276	0.0196224	yes	chr14	10564777	10574128	circRNA	DOCK5	mRNA
circRNA5861	down	-1.37055	0.019638	yes	chr6	100705514	100726469	circRNA	CABLES1	mRNA
circRNA6275	down	-2.23771	0.0196406	yes	chr17	28371666	28374820	circRNA	ENSSSCG00000007080	mRNA
circRNA935	up	3.18905	0.0196734	yes	chr3	55892340	55906122	circRNA	ENSSSCG00000008171	mRNA
circRNA6467	up	1.8702	0.0197087	yes	chr6	82747697	82748613	circRNA	TXLNA	mRNA
circRNA6879	up	3.23349	0.0197419	yes	chr17	43088897	43099094	circRNA	ITCH	mRNA
circRNA991	up	1.58254	0.0197631	yes	chr1	249459092	249479177	circRNA	PTAR1	mRNA
circRNA4142	up	1.00874	0.0197759	yes	chr12	41358082	41376829	circRNA	ENSSSCG00000017712	mRNA
circRNA5157	up	Inf	0.0197959	yes	chr10	5117717	5117939	circRNA	BRINP3	mRNA
circRNA4786	up	1.77481	0.0197964	yes	chr1	181041196	181052777	circRNA	DPP8	mRNA
circRNA5773	down	-7.64479	0.0198093	yes	chr14	44167298	44172408	circRNA	ACACB	mRNA
circRNA1738	down	-5.81683	0.0198691	yes	chr15	28837231	28837562	circRNA	MAP3K2	mRNA
circRNA1746	up	Inf	0.0199279	yes	chr15	67058246	67060363	circRNA	PRPF40A	mRNA
circRNA1403	up	6.41647	0.0199849	yes	chr1	82091327	82105874	circRNA	ENSSSCG00000004373	mRNA
circRNA6088	down	-1.40436	0.0199926	yes	chr1	283798123	283824543	circRNA	PTBP3	mRNA
circRNA3975	up	3.75827	0.0200067	yes	chr1	298164586	298397604	circRNA	ENSSSCG00000026555	mRNA
circRNA5459	up	2.55923	0.020045	yes	chr6	88784567	88793100	circRNA	TRIT1	mRNA
ciRNA220	down	-6.62849	0.0200559	yes	chr12	46818103	46818269	ciRNA	SPAG5	mRNA
circRNA6105	up	1.56051	0.0201157	yes	chr9	7162160	7175424	circRNA	NUP98	mRNA
circRNA1150	up	2.6418	0.0201878	yes	chr7	57612079	57626098	circRNA	WHAMM	mRNA
circRNA6034	up	1.84731	0.0202367	yes	chr1	30921618	30942245	circRNA	ENSSSCG00000026041	mRNA
circRNA4705	up	2.55619	0.0202416	yes	chr2	135210890	135214723	circRNA	MARCH3	mRNA
circRNA261	up	3.25518	0.0202436	yes	chr18	16132128	16179806	circRNA	ENSSSCG00000016543	mRNA
circRNA3354	up	2.29401	0.0203261	yes	chr18	19932858	19949999	circRNA	UBE2H	mRNA
circRNA4647	up	2.00063	0.0203554	yes	chr3	122078615	122103795	circRNA	ENSSSCG00000008592	mRNA
circRNA3896	up	1.63704	0.0203665	yes	chr2	117898216	117922618	circRNA	ENSSSCG00000014190	mRNA
circRNA5983	down	-1.27824	0.0203779	yes	chr3	139875331	139877828	circRNA	ENSSSCG00000028140	mRNA
circRNA6687	up	2.33881	0.0204023	yes	chr1	270098471	270137521	circRNA	ERP44	mRNA
circRNA1645	up	1.81413	0.0205223	yes	chr12	25819429	25823218	circRNA	ENSSSCG00000023586	mRNA
circRNA669	up	1.49042	0.0205358	yes	chr1	253254	257333	circRNA	ENSSSCG00000029697	mRNA
circRNA1081	up	1.68821	0.0205397	yes	chr10	75519292	75524742	circRNA	ENSSSCG00000029602	mRNA
circRNA1332	down	-2.25083	0.0205451	yes	chr2	16545939	16546678	circRNA	NR1H3	mRNA
circRNA5626	down	-1.83067	0.0205858	yes	chr9	40614116	40615184	circRNA	ACAT1	mRNA
circRNA1621	up	2.66147	0.0206231	yes	chr13	149623912	149635582	circRNA	GSK3B	mRNA
circRNA328	down	-1.86395	0.0206446	yes	chr8	140162152	140165469	circRNA	CH242-113D13.1	mRNA
circRNA807	up	1.50207	0.0206516	yes	chr10	62755545	62767160	circRNA	PARD3	mRNA
circRNA6481	up	2.88157	0.0206599	yes	chr6	132108169	132117840	circRNA	ANKRD13C	mRNA
circRNA5123	up	1.80738	0.0207108	yes	chr12	49215257	49219028	circRNA	NXN	mRNA
circRNA5048	up	2.29119	0.0207143	yes	chr13	84999039	85016563	circRNA	ENSSSCG00000028601	mRNA
circRNA307	up	1.19355	0.020774	yes	chr8	18868480	18882133	circRNA	DHX15	mRNA
circRNA6018	up	2.60812	0.0208468	yes	chr2	128516665	128530836	circRNA	DMXL1	mRNA
circRNA2862	up	1.15404	0.0208578	yes	chr1	303316196	303318895	circRNA	NUP188	mRNA
circRNA3092	up	1.67847	0.0209024	yes	chr7	119506586	119525429	circRNA	CCDC88C	mRNA
circRNA2124	up	2.8667	0.020982	yes	chr2	112497186	112518956	circRNA	PAM	mRNA
circRNA3231	up	2.70682	0.0210421	yes	chr3	121279732	121363022	circRNA	NCOA1	mRNA
circRNA4479	up	1.56539	0.021053	yes	chr6	147646274	147648651	circRNA	ZFYVE9	mRNA
circRNA2425	up	2.42178	0.0210698	yes	chr12	22280097	22281595	circRNA	IGFBP4	mRNA
circRNA286	down	-2.37032	0.021213	yes	chr9	63116301	63117373	circRNA	ZBTB44	mRNA
circRNA5009	up	1.72414	0.0212614	yes	chr8	140236351	140241189	circRNA	PKD2	mRNA
circRNA2532	up	3.51965	0.0212758	yes	chr16	34241042	34241586	circRNA	ITGA2	mRNA
circRNA4702	down	-2.48962	0.0213062	yes	chr2	106419586	106423715	circRNA	ELL2	mRNA
circRNA3452	up	2.75482	0.0213306	yes	chr13	32176941	32180764	circRNA	FYCO1	mRNA
circRNA5653	down	-3.5672	0.0214393	yes	chr8	57889006	57890863	circRNA	PPAT	mRNA
circRNA5948	up	1.68661	0.0214604	yes	chr3	7901653	7902373	circRNA	LRCH4	mRNA
circRNA5035	up	3.13344	0.0214678	yes	chr13	43998125	44001723	circRNA	ABHD6	mRNA
circRNA5038	up	2.92246	0.0214878	yes	chr13	52666896	52687838	circRNA	LRIG1	mRNA
circRNA2308	up	1.49696	0.0214973	yes	chr8	33317026	33354941	circRNA	APBB2	mRNA
circRNA2654	up	Inf	0.021512	yes	chrX	17015324	17030595	circRNA	MAP3K15	mRNA
circRNA1362	up	1.24776	0.0215163	yes	chr2	91169756	91264363	circRNA	MSH3	mRNA
circRNA429	up	3.66097	0.0215373	yes	chr10	47086473	47106567	circRNA	ARHGAP12	mRNA
circRNA3486	up	3.26458	0.0216172	yes	chr13	167069887	167081024	circRNA	SENP7	mRNA
circRNA1107	down	-1.23164	0.0216489	yes	chr14	6917870	6918083	circRNA	BMP1	mRNA
circRNA5204	up	2.10786	0.0216538	yes	chr17	36148045	36158466	circRNA	PANK2	mRNA
circRNA190	down	-4.32364	0.0216668	yes	chr2	106419586	106419952	circRNA	ELL2	mRNA
circRNA6150	down	-3.53844	0.0216797	yes	chr8	57887917	57890863	circRNA	PPAT	mRNA
circRNA556	up	1.14694	0.0216852	yes	chr7	21551602	21589708	circRNA	CARMIL1	mRNA
circRNA1382	up	1.33372	0.021771	yes	chr2	154050733	154056647	circRNA	ENSSSCG00000014409	mRNA
circRNA6582	up	1.51514	0.0217931	yes	chr3	107119004	107127924	circRNA	ENSSSCG00000008475	mRNA
circRNA425	down	-3.15082	0.0218526	yes	chr10	33080414	33081598	circRNA	ZCCHC6	mRNA
circRNA2900	up	1.68142	0.0218565	yes	chr9	138073302	138107955	circRNA	C1orf21	mRNA
circRNA766	up	2.71647	0.0218786	yes	chr13	172805132	172817294	circRNA	ARL6	mRNA
circRNA1284	up	4.8932	0.0218841	yes	chr3	16286906	16295464	circRNA	ENSSSCG00000007733	mRNA
circRNA6477	up	1.6197	0.021887	yes	chr6	101573996	101586767	circRNA	TTC39C	mRNA
circRNA564	down	-1.1573	0.0219069	yes	chr7	62801435	62806164	circRNA	PTPN9	mRNA
ciRNA105	down	-1.94337	0.0220533	yes	chr12	49604114	49604271	ciRNA	ENSSSCG00000030707	mRNA
circRNA2283	up	3.33359	0.0220554	yes	chr9	131740321	131753192	circRNA	RASAL2	mRNA
circRNA6584	down	-3.07886	0.0221021	yes	chr3	110302182	110306694	circRNA	CRIM1	mRNA
circRNA1933	up	2.51867	0.0221153	yes	chr6	147646274	147657973	circRNA	ZFYVE9	mRNA
circRNA986	up	1.86555	0.0221278	yes	chr1	227185988	227210811	circRNA	DENND4C	mRNA
circRNA882	up	1.98016	0.0221439	yes	chr7	128864504	128873465	circRNA	CDC42BPB	mRNA
circRNA6333	up	4.01797	0.0222911	yes	chr15	131253281	131269754	circRNA	XRCC5	mRNA
circRNA3767	up	1.20785	0.0223043	yes	chr5	16681220	16694950	circRNA	LARP4	mRNA
circRNA4617	up	3.54952	0.022369	yes	chr3	55893646	55906122	circRNA	ENSSSCG00000008171	mRNA
circRNA4007	up	1.35103	0.0225087	yes	chr9	7122453	7134943	circRNA	NUP98	mRNA
circRNA1300	up	3.51843	0.0225286	yes	chr3	75742883	75756405	circRNA	C2orf42	mRNA
circRNA5535	up	2.46349	0.0225779	yes	chr3	118544288	118555411	circRNA	ZNF512	mRNA
circRNA5663	up	1.67732	0.0225783	yes	chr13	19755935	19768395	circRNA	STT3B	mRNA
circRNA6475	up	2.80695	0.0225929	yes	chr6	96984106	96992945	circRNA	ENSSSCG00000029030	mRNA
circRNA3300	up	1.88386	0.0226214	yes	chr1	116832481	116834421	circRNA	WDR7	mRNA
circRNA1764	up	1.8299	0.0226341	yes	chr15	150059437	150066730	circRNA	ENSSSCG00000024859	mRNA
circRNA2988	up	1.39903	0.0226913	yes	chr17	33110811	33124910	circRNA	XRN2	mRNA
circRNA6047	up	1.36494	0.0227503	yes	chr1	119499992	119513527	circRNA	HERC1	mRNA
circRNA5727	up	1.32816	0.0227669	yes	chr10	62738557	62767160	circRNA	PARD3	mRNA
circRNA2466	up	2.85363	0.0227681	yes	chr11	76626393	76633533	circRNA	TMTC4	mRNA
circRNA109	up	3.25622	0.0228303	yes	chr4	87209598	87214970	circRNA	PRKDC	mRNA
circRNA5027	down	-1.6758	0.0228308	yes	chr13	34918254	34919128	circRNA	QRICH1	mRNA
circRNA1026	up	3.18593	0.0228317	yes	chr8	127091752	127097642	circRNA	SLC9B1	mRNA
circRNA894	down	-1.05986	0.0228415	yes	chr6	92170081	92179625	circRNA	NDUFV2	mRNA
circRNA5782	down	-3.79094	0.0228741	yes	chr14	108758466	108762267	circRNA	PAPSS2	mRNA
circRNA3589	down	-1.1898	0.022892	yes	chr15	28808655	28823242	circRNA	MAP3K2	mRNA
circRNA1360	up	1.80433	0.0229498	yes	chr2	86056742	86057720	circRNA	COL4A3BP	mRNA
circRNA1407	up	3.08709	0.0230729	yes	chr1	94575046	94595460	circRNA	IBTK	mRNA
circRNA760	down	-2.23294	0.0230784	yes	chr13	131237145	131237882	circRNA	ENSSSCG00000011779	mRNA
circRNA4867	up	7.73097	0.0231257	yes	chr18	36511453	36535413	circRNA	ENSSSCG00000025602	mRNA
circRNA3168	down	-7.78068	0.0231345	yes	chr4	39244235	39270064	circRNA	SNX31	mRNA
circRNA2340	up	3.25006	0.0232095	yes	chr8	146915840	146957342	circRNA	ANTXR2	mRNA
circRNA1163	up	3.3241	0.0232339	yes	chr7	95851228	95940703	circRNA	FUT8	mRNA
circRNA4109	up	1.10515	0.0232342	yes	chr13	106138563	106221705	circRNA	ENSSSCG00000027556	mRNA
circRNA2858	up	1.70572	0.0232775	yes	chr1	284289001	284315441	circRNA	SNX30	mRNA
circRNA6496	up	1.68706	0.0232809	yes	chr5	13972589	13980303	circRNA	ENSSSCG00000000169	mRNA
circRNA4577	up	1.90353	0.0233438	yes	chr4	103183198	103183939	circRNA	ENSSSCG00000006508	mRNA
circRNA2854	up	3.11975	0.0233443	yes	chr1	276477316	276480108	circRNA	FSD1L	mRNA
circRNA2671	up	4.18902	0.0233555	yes	chrX	70495253	70509324	circRNA	ATRX	mRNA
circRNA4407	up	1.37936	0.0233666	yes	chr7	121213886	121224532	circRNA	BTBD7	mRNA
circRNA1732	up	2.8754	0.0233754	yes	chr16	51837857	51839390	circRNA	BDP1	mRNA
circRNA3362	up	2.56628	0.0234166	yes	chr18	36452161	36461588	circRNA	ENSSSCG00000025602	mRNA
circRNA481	up	1.1144	0.0234558	yes	chr15	139739546	139759199	circRNA	ENSSSCG00000016234	mRNA
circRNA1799	up	2.18378	0.0234746	yes	chr14	65044972	65054750	circRNA	URB2	mRNA
circRNA3195	up	Inf	0.0234936	yes	chr4	130781405	130820754	circRNA	ENSSSCG00000006877	mRNA
circRNA6280	up	4.22478	0.0235677	yes	chr17	43227568	43253419	circRNA	PIGU	mRNA
circRNA1491	up	1.16293	0.0236661	yes	chr9	32780	37845	circRNA	IPO7	mRNA
circRNA2865	up	1.38739	0.0237022	yes	chr18	4983023	4997683	circRNA	ENSSSCG00000016426	mRNA
circRNA1704	up	1.75627	0.0237709	yes	chr10	75674306	75687736	circRNA	LARP4B	mRNA
circRNA899	up	4.96773	0.0237842	yes	chr6	153769525	153776595	circRNA	EIF2B3	mRNA
circRNA1285	down	-1.06785	0.0237967	yes	chr3	17254499	17261734	circRNA	ZNF713	mRNA
circRNA605	up	1.93649	0.0238028	yes	chr4	16883656	16894163	circRNA	ENSSSCG00000021744	mRNA
circRNA2397	up	3.37726	0.023885	yes	chr13	162787503	162804272	circRNA	ENSSSCG00000022486	mRNA
circRNA5372	up	Inf	0.0239206	yes	chr14	106269183	106279735	circRNA	PRKG1	mRNA
circRNA4870	up	3.5926	0.0240009	yes	chr18	42650857	42658779	circRNA	DPY19L1	mRNA
circRNA1550	up	2.07422	0.0240376	yes	chr8	82980802	83006817	circRNA	ENSSSCG00000009021	mRNA
circRNA4777	up	2.06873	0.0240469	yes	chr1	161704139	161765610	circRNA	ENSSSCG00000004857	mRNA
circRNA3850	up	2.99461	0.0240567	yes	chr3	84500633	84510751	circRNA	ENSSSCG00000008382	mRNA
circRNA5061	down	-1.72325	0.0240654	yes	chr13	117571688	117581247	circRNA	PHC3	mRNA
circRNA2016	up	1.6576	0.0240662	yes	chr4	139822139	139828474	circRNA	PKN2	mRNA
circRNA5991	up	3.82266	0.0240759	yes	chr2	20519951	20538034	circRNA	TTC17	mRNA
circRNA3527	up	3.92246	0.0240817	yes	chr11	53974514	53991328	circRNA	MYCBP2	mRNA
circRNA5397	up	2.08527	0.0241518	yes	chrX	22018872	22030746	circRNA	PDK3	mRNA
circRNA164	up	1.0468	0.0241625	yes	chr3	125854763	125880552	circRNA	PUM2	mRNA
circRNA3196	up	3.66708	0.0241689	yes	chr3	6030503	6030944	circRNA	TRRAP	mRNA
circRNA615	up	Inf	0.0242145	yes	chr4	107670743	107671822	circRNA	CTSS	mRNA
circRNA3146	up	1.71872	0.0242346	yes	chr5	56933127	56955103	circRNA	AEBP2	mRNA
circRNA6385	down	-1.70934	0.0242622	yes	chrX	7300154	7301983	circRNA	WWC3	mRNA
circRNA1700	up	2.06688	0.0242713	yes	chr10	65591715	65601734	circRNA	ENSSSCG00000011114	mRNA
circRNA4589	up	3.73185	0.0242726	yes	chr4	129315285	129336726	circRNA	CDC14A	mRNA
circRNA2145	up	2.80563	0.0242902	yes	chr1	45756711	45780118	circRNA	TBC1D32	mRNA
circRNA3121	up	1.67735	0.0242964	yes	chr6	113180194	113190078	circRNA	FHOD3	mRNA
circRNA885	down	-2.12861	0.0243929	yes	chr6	32344546	32383981	circRNA	PHKB	mRNA
circRNA2314	up	3.92129	0.0244056	yes	chr8	44144972	44147599	circRNA	SRD5A3	mRNA
circRNA2520	up	2.64306	0.0244418	yes	chr17	36694691	36717412	circRNA	C20orf194	mRNA
circRNA2421	up	3.35179	0.024453	yes	chr12	15502922	15592721	circRNA	TANC2	mRNA
circRNA903	up	1.48577	0.0244562	yes	chr5	15867819	15878925	circRNA	ENSSSCG00000000199	mRNA
circRNA4648	up	2.81951	0.0244597	yes	chr3	125885513	125927436	circRNA	PUM2	mRNA
circRNA4764	up	1.84234	0.0244841	yes	chr1	134518067	134519147	circRNA	SPPL2A	mRNA
circRNA6576	up	3.05609	0.0245596	yes	chr3	84395797	84408282	circRNA	ENSSSCG00000008382	mRNA
circRNA224	up	1.86596	0.0246127	yes	chr1	132962462	132967155	circRNA	TMOD3	mRNA
circRNA2528	up	2.27868	0.0246732	yes	chr16	22541545	22548212	circRNA	NADK2	mRNA
circRNA5217	up	1.53016	0.0248011	yes	chr17	55222830	55230630	circRNA	ZMYND8	mRNA
circRNA6628	up	2.68318	0.0248143	yes	chr1	16109508	16110228	circRNA	ENSSSCG00000004081	mRNA
circRNA577	up	1.68356	0.0248329	yes	chr6	16653258	16673251	circRNA	SNTB2	mRNA
circRNA1900	up	4.48511	0.0248418	yes	chr6	18449174	18450692	circRNA	CNOT1	mRNA
circRNA2814	up	1.57734	0.0249224	yes	chr2	131561222	131580729	circRNA	SNX24	mRNA
circRNA5699	up	1.25537	0.0249257	yes	chr12	23393480	23401474	circRNA	FBXL20	mRNA
circRNA610	up	1.88767	0.0249468	yes	chr4	45576146	45583827	circRNA	KIAA1429	mRNA
circRNA3977	up	2.33819	0.024996	yes	chr1	300377341	300398288	circRNA	PBX3	mRNA
circRNA4398	up	Inf	0.0250434	yes	chr7	102409867	102411389	circRNA	ENSSSCG00000002341	mRNA
circRNA3030	up	7.9158	0.0250575	yes	chr14	21488596	21497303	circRNA	NEK1	mRNA
circRNA3002	up	1.48708	0.0250594	yes	chr16	47827438	47840449	circRNA	ENSSSCG00000016953	mRNA
circRNA3193	up	1.85474	0.025143	yes	chr4	121522270	121535288	circRNA	ENSSSCG00000006840	mRNA
circRNA168	down	-2.67124	0.0251751	yes	chr3	130917081	130921437	circRNA	ENSSSCG00000008621	mRNA
circRNA949	down	-3.52761	0.0252183	yes	chr2	18698775	18700214	circRNA	ENSSSCG00000013276	mRNA
circRNA961	up	2.20808	0.0253002	yes	chr2	134956480	134971715	circRNA	ALDH7A1	mRNA
circRNA3653	up	1.56235	0.0253248	yes	chr14	108510849	108526840	circRNA	MINPP1	mRNA
circRNA3069	up	1.04222	0.0253626	yes	chrX	60481903	60495790	circRNA	AR	mRNA
circRNA4897	up	1.54686	0.0253778	yes	chr9	36812992	36834305	circRNA	YAP1	mRNA
circRNA4351	up	3.80373	0.0253794	yes	chr7	16456058	16480237	circRNA	MBOAT1	mRNA
circRNA1472	up	3.17743	0.0253953	yes	chr18	21408481	21445641	circRNA	ENSSSCG00000016590	mRNA
ciRNA36	up	4.03668	0.0254095	yes	chrX	124508876	124511064	ciRNA	MBNL3	mRNA
circRNA3622	up	3.17963	0.0254333	yes	chr14	37732669	37770325	circRNA	FBXW8	mRNA
circRNA1795	up	1.739	0.0254555	yes	chr14	53906577	53915641	circRNA	PI4KA	mRNA
ciRNA121	up	1.92831	0.0254757	yes	chr3	19849723	19851270	ciRNA	IL4R	mRNA
circRNA6928	up	1.35176	0.0255028	yes	chr14	32289829	32291089	circRNA	MLXIP	mRNA
circRNA1010	up	3.79729	0.0255103	yes	chr9	65398517	65404164	circRNA	NTM	mRNA
circRNA3265	down	-1.05746	0.0255513	yes	chr2	83176655	83183794	circRNA	KIAA1191	mRNA
circRNA34	up	1.7165	0.0256567	yes	chr6	18444401	18445181	circRNA	CNOT1	mRNA
circRNA5492	up	2.85081	0.025749	yes	chr4	37567667	37568955	circRNA	CU459197.4	mRNA
circRNA923	up	3.28164	0.0257921	yes	chr4	121911465	121930222	circRNA	FAM102B	mRNA
circRNA1130	up	2.71595	0.025808	yes	chrX	121922443	121923027	circRNA	OCRL	mRNA
circRNA2823	up	1.63801	0.0258197	yes	chr1	23026021	23048096	circRNA	ENSSSCG00000004123	mRNA
circRNA4287	down	-2.76927	0.0258227	yes	chr14	12560869	12569344	circRNA	SCARA3	mRNA
circRNA3100	down	-2.88441	0.0258361	yes	chr6	32369034	32383981	circRNA	PHKB	mRNA
circRNA835	up	4.40477	0.0258687	yes	chr15	126139921	126171925	circRNA	ENSSSCG00000016160	mRNA
circRNA761	up	1.49538	0.0259044	yes	chr13	143279301	143282223	circRNA	PCYT1A	mRNA
circRNA5710	up	1.48838	0.0259062	yes	chr11	84974408	84979400	circRNA	ENSSSCG00000009551	mRNA
circRNA584	up	2.26002	0.025917	yes	chr6	101010679	101012777	circRNA	NPC1	mRNA
circRNA55	up	1.37328	0.0259735	yes	chr6	137402709	137408448	circRNA	ALG6	mRNA
circRNA2649	down	-1.96594	0.0259826	yes	chr14	145874264	145875955	circRNA	ZRANB1	mRNA
circRNA2052	up	Inf	0.0259875	yes	chr3	90763279	90767877	circRNA	MTIF2	mRNA
circRNA5707	up	1.95178	0.0260176	yes	chr11	56283465	56286876	circRNA	NDFIP2	mRNA
circRNA5493	up	1.56561	0.0260497	yes	chr4	42554036	42670721	circRNA	ENSSSCG00000006087	mRNA
circRNA46	down	-1.84747	0.0260667	yes	chr6	92170081	92172175	circRNA	NDUFV2	mRNA
circRNA4075	up	1.45062	0.0261148	yes	chr8	143249769	143267112	circRNA	WDFY3	mRNA
circRNA2605	up	2.06751	0.0262135	yes	chr14	30062323	30065031	circRNA	SCARB1	mRNA
circRNA6550	up	1.25473	0.0262251	yes	chr3	14916894	14920435	circRNA	ENSSSCG00000007727	mRNA
circRNA6848	down	-1.78572	0.0263014	yes	chr11	55451765	55459959	circRNA	RNF219	mRNA
circRNA3861	up	1.64924	0.026313	yes	chr3	107058409	107067199	circRNA	ENSSSCG00000008476	mRNA
circRNA1466	up	2.93581	0.0263294	yes	chr18	16840493	16876402	circRNA	ENSSSCG00000016544	mRNA
circRNA3328	up	6.90086	0.0263575	yes	chr1	256867612	256946680	circRNA	VPS13A	mRNA
circRNA6303	down	-2.5857	0.0264286	yes	chr16	71750036	71752885	circRNA	CYFIP2	mRNA
circRNA4166	up	2.24101	0.0264335	yes	chr11	70414750	70417821	circRNA	ENSSSCG00000009495	mRNA
circRNA3814	up	1.89005	0.0264498	yes	chr4	103198177	103238159	circRNA	ENSSSCG00000006508	mRNA
circRNA6605	up	1.0042	0.026477	yes	chr2	61998689	61999566	circRNA	ILVBL	mRNA
circRNA2291	up	3.88202	0.0265046	yes	chr9	143414817	143415198	circRNA	VASH2	mRNA
circRNA2788	up	1.43609	0.0265349	yes	chr3	113999359	114020837	circRNA	BIRC6	mRNA
circRNA840	up	2.87357	0.0265502	yes	chr14	31384107	31397196	circRNA	MPHOSPH9	mRNA
circRNA3335	up	3.91814	0.0266736	yes	chr1	269912309	269975028	circRNA	STX17	mRNA
circRNA1042	up	1.36216	0.0267607	yes	chr13	190906188	190926244	circRNA	USP25	mRNA
circRNA6490	up	1.22461	0.0267637	yes	chr5	126533	145544	circRNA	TBC1D22A	mRNA
circRNA1585	down	-5.36202	0.0268119	yes	chr13	30860472	30862241	circRNA	KIF15	mRNA
circRNA4035	up	Inf	0.026831	yes	chr9	103144430	103155297	circRNA	KIAA1324L	mRNA
circRNA1474	up	2.46849	0.0268343	yes	chr18	21479419	21512785	circRNA	ENSSSCG00000016590	mRNA
circRNA3889	up	3.06005	0.0268862	yes	chr2	87129523	87130100	circRNA	ENSSSCG00000014088	mRNA
circRNA400	down	-1.64749	0.0268953	yes	chr12	62856130	62856631	circRNA	ENSSSCG00000018049	mRNA
circRNA4056	up	Inf	0.0269224	yes	chr8	58669379	58682109	circRNA	ENSSSCG00000008909	mRNA
circRNA3829	up	1.08084	0.0269842	yes	chr3	11490443	11496310	circRNA	GTF2I	mRNA
circRNA1237	up	2.53407	0.0269965	yes	chr5	89495676	89500260	circRNA	ENSSSCG00000000884	mRNA
circRNA4628	up	2.1753	0.0270057	yes	chr3	84441028	84446345	circRNA	ENSSSCG00000008382	mRNA
circRNA2355	up	1.6164	0.0270277	yes	chr13	33832272	33841548	circRNA	ENSSSCG00000011340	mRNA
circRNA6778	up	1.288	0.0271695	yes	chr13	73059466	73064888	circRNA	MTMR14	mRNA
circRNA3135	up	1.56052	0.0272615	yes	chr6	157477813	157496882	circRNA	NFYC	mRNA
circRNA4094	up	1.4559	0.027266	yes	chr13	55568355	55581679	circRNA	UBA3	mRNA
circRNA1958	up	1.39533	0.0272676	yes	chr5	68765502	68770634	circRNA	PARP11	mRNA
circRNA5840	up	1.95192	0.0272847	yes	chr6	64542087	64545302	circRNA	KIF1B	mRNA
circRNA3671	up	1.31217	0.0272855	yes	chrX	40375709	40385014	circRNA	ATP6AP2	mRNA
circRNA3394	up	2.74191	0.0273129	yes	chr9	83318844	83350281	circRNA	SLC25A13	mRNA
circRNA3311	up	1.1155	0.0273616	yes	chr1	176836675	176840819	circRNA	PIGN	mRNA
circRNA6785	down	-1.90009	0.0273728	yes	chr13	106767437	106770245	circRNA	RARRES1	mRNA
circRNA1213	up	1.79949	0.0273816	yes	chr5	5192560	5193695	circRNA	MKL1	mRNA
circRNA2186	up	5.27709	0.0273905	yes	chr1	206967953	206980155	circRNA	EXOC5	mRNA
ciRNA207	down	-3.00235	0.0274021	yes	chr18	3018983	3019564	ciRNA	INSIG1	mRNA
circRNA98	up	Inf	0.0274719	yes	chr4	18475110	18475736	circRNA	SHAS2	mRNA
circRNA1405	up	2.28133	0.0274958	yes	chr1	85505386	85512772	circRNA	ENSSSCG00000004405	mRNA
circRNA6297	up	1.33578	0.0276505	yes	chr16	47794190	47811066	circRNA	ENSSSCG00000016953	mRNA
circRNA3641	up	2.16527	0.0276548	yes	chr14	62480123	62495767	circRNA	SIPA1L2	mRNA
circRNA5883	up	3.06505	0.0276622	yes	chr5	9606475	9606699	circRNA	ENSSSCG00000028256	mRNA
circRNA631	up	1.47075	0.0277075	yes	chr3	43206730	43216856	circRNA	ENSSSCG00000029797	mRNA
circRNA6872	up	1.90377	0.0277817	yes	chr10	71753807	71756456	circRNA	ENSSSCG00000028982	mRNA
circRNA6337	up	2.85329	0.0278406	yes	chr14	10435358	10444996	circRNA	DOCK5	mRNA
circRNA5722	down	-1.25446	0.0278448	yes	chr10	50688302	50702358	circRNA	MINDY3	mRNA
circRNA3940	up	5.7573	0.0278464	yes	chr1	141488484	141501160	circRNA	ENSSSCG00000004684	mRNA
circRNA1281	up	3.54554	0.0278629	yes	chr3	4820089	4881241	circRNA	ENSSSCG00000021285	mRNA
circRNA4472	up	1.51887	0.0278844	yes	chr6	140604563	140633169	circRNA	ENSSSCG00000003828	mRNA
circRNA6868	down	-1.8266	0.0279408	yes	chr10	54051649	54053071	circRNA	YME1L1	mRNA
circRNA2852	up	2.29636	0.0280242	yes	chr1	242167449	242206613	circRNA	RIC1	mRNA
circRNA251	up	1.94955	0.0280272	yes	chr1	297259934	297269174	circRNA	ENSSSCG00000005575	mRNA
circRNA6020	down	-1.53917	0.0280479	yes	chr2	139874574	139885179	circRNA	P4HA2	mRNA
circRNA5008	up	3.66208	0.0280903	yes	chr8	134718020	134725134	circRNA	SMARCAD1	mRNA
circRNA6685	up	1.80141	0.0280942	yes	chr1	269120143	269128758	circRNA	TGFBR1	mRNA
circRNA1272	up	1.5778	0.0281066	yes	chr4	116307640	116337100	circRNA	ENSSSCG00000006757	mRNA
circRNA351	up	1.14404	0.0281501	yes	chr13	81190634	81195086	circRNA	DNAJC13	mRNA
circRNA200	down	-1.78084	0.0282053	yes	chr2	147049942	147051156	circRNA	ENSSSCG00000014343	mRNA
circRNA420	up	4.9336	0.0282084	yes	chr10	24484010	24486223	circRNA	TP53BP2	mRNA
circRNA5867	up	2.4203	0.0282128	yes	chr6	120005757	120013390	circRNA	TTLL7	mRNA
ciRNA233	down	-1.4851	0.0282525	yes	chr6	39522018	39522138	ciRNA	GPI	mRNA
circRNA2307	up	1.41776	0.0284489	yes	chr8	32724591	32733886	circRNA	PDS5A	mRNA
circRNA3591	up	1.5228	0.0284498	yes	chr15	36377634	36400720	circRNA	PTPN4	mRNA
circRNA1995	up	2.56026	0.0284676	yes	chr4	87215602	87249860	circRNA	PRKDC	mRNA
circRNA6955	up	2.46757	0.0285427	yes	chr14	135320954	135351204	circRNA	ENSSSCG00000010645	mRNA
ciRNA14	up	2.33171	0.0285438	yes	chr1	146922224	146922456	ciRNA	THBS1	mRNA
circRNA1434	up	1.63348	0.0286064	yes	chr1	209436102	209439080	circRNA	DAAM1	mRNA
circRNA567	up	2.41514	0.0286681	yes	chr7	73497504	73499060	circRNA	G2E3	mRNA
circRNA6753	up	2.25281	0.0286869	yes	chr8	139711505	139712357	circRNA	ENSSSCG00000026196	mRNA
circRNA4553	up	1.29903	0.0287659	yes	chr4	70410831	70422678	circRNA	TRAM1	mRNA
circRNA1462	up	1.38824	0.0288181	yes	chr18	10450277	10458792	circRNA	ENSSSCG00000025850	mRNA
circRNA3264	down	-2.23728	0.0288494	yes	chr2	83176655	83177099	circRNA	KIAA1191	mRNA
ciRNA192	down	-4.56745	0.0289026	yes	chr4	116705836	116706128	ciRNA	OLFML3	mRNA
circRNA3786	up	2.54947	0.0289701	yes	chr5	86068811	86088461	circRNA	ENSSSCG00000000860	mRNA
circRNA1219	up	1.74702	0.0290658	yes	chr5	17115286	17122289	circRNA	DIP2B	mRNA
circRNA6744	up	3.24127	0.0291278	yes	chr8	50626727	50638772	circRNA	RAPGEF2	mRNA
circRNA1158	up	1.61481	0.0291559	yes	chr7	65184011	65192947	circRNA	ENSSSCG00000001922	mRNA
circRNA5070	up	2.9021	0.0292933	yes	chr13	130135079	130137616	circRNA	ENSSSCG00000011772	mRNA
circRNA759	up	2.77369	0.0293283	yes	chr13	119145908	119154990	circRNA	PLD1	mRNA
circRNA6332	up	3.3147	0.0293359	yes	chr15	124587573	124629189	circRNA	KANSL1L	mRNA
circRNA520	up	1.99556	0.0293411	yes	chr14	83832559	83833151	circRNA	SAMD8	mRNA
circRNA2594	up	3.20594	0.0294157	yes	chr14	10474853	10483610	circRNA	DOCK5	mRNA
circRNA5637	up	1.96296	0.0294851	yes	chr9	134281948	134315213	circRNA	XPR1	mRNA
circRNA667	up	Inf	0.0294877	yes	chr2	136560329	136564008	circRNA	FBN2	mRNA
circRNA728	up	Inf	0.0295208	yes	chr9	113194170	113198196	circRNA	ENSSSCG00000028424	mRNA
circRNA2362	up	1.71914	0.0295304	yes	chr13	50137020	50191846	circRNA	PRICKLE2	mRNA
circRNA5435	up	1.27185	0.0295472	yes	chr7	73514061	73528501	circRNA	G2E3	mRNA
circRNA6949	up	2.1648	0.0296746	yes	chr14	98428854	98448209	circRNA	PARG	mRNA
circRNA382	up	2.41311	0.0296823	yes	chr12	37266915	37274657	circRNA	VMP1	mRNA
circRNA2819	down	-Inf	0.0297438	yes	chr2	156484061	156485861	circRNA	HTR4	mRNA
circRNA387	up	1.14441	0.0297478	yes	chr12	37781159	37784033	circRNA	INTS2	mRNA
circRNA1948	up	3.80709	0.029845	yes	chr5	20451162	20451938	circRNA	ITGA5	mRNA
circRNA1486	down	-1.53124	0.0298727	yes	chr18	52285386	52286796	circRNA	ENSSSCG00000016715	mRNA
circRNA101	down	-5.71917	0.0298809	yes	chr4	39264389	39272615	circRNA	SNX31	mRNA
circRNA6735	up	2.66786	0.0299257	yes	chr8	10536893	10542067	circRNA	CC2D2A	mRNA
circRNA381	up	2.22369	0.0299695	yes	chr12	37228113	37231860	circRNA	VMP1	mRNA
circRNA657	up	Inf	0.0300073	yes	chr2	73203999	73204192	circRNA	GTF2F1	mRNA
ciRNA227	down	-2.55674	0.0300587	yes	chr14	152198497	152198748	ciRNA	BNIP3	mRNA
circRNA1672	up	1.22228	0.0301394	yes	chr11	25529781	25549061	circRNA	DGKH	mRNA
circRNA5504	up	1.55849	0.0301491	yes	chr4	110134177	110140922	circRNA	CHD1L	mRNA
circRNA3384	down	-1.07455	0.0301499	yes	chr9	49325141	49325706	circRNA	SIK3	mRNA
circRNA4819	down	-2.24621	0.0301782	yes	chr1	265189347	265263627	circRNA	MELK	mRNA
circRNA1128	up	3.08734	0.0302309	yes	chrX	85941401	85946304	circRNA	ENSSSCG00000012474	mRNA
circRNA2096	up	1.78367	0.0302312	yes	chr2	48859588	48876280	circRNA	FAR1	mRNA
circRNA288	up	3.48932	0.0302492	yes	chr9	85105697	85106364	circRNA	ENSSSCG00000015341	mRNA
circRNA5182	up	3.57644	0.030306	yes	chr10	52788849	52803015	circRNA	ENSSSCG00000011056	mRNA
circRNA5818	up	1.73359	0.030309	yes	chr7	100815934	100820820	circRNA	PCNX1	mRNA
circRNA4566	up	Inf	0.0303922	yes	chr4	90763915	90764457	circRNA	MPC2	mRNA
circRNA5011	up	1.39434	0.0304035	yes	chr8	144590108	144596387	circRNA	ENSSSCG00000009241	mRNA
circRNA6142	up	3.45259	0.0304869	yes	chr8	31876392	31887300	circRNA	ENSSSCG00000008787	mRNA
circRNA913	up	1.18928	0.0305805	yes	chr4	75094374	75116961	circRNA	MTFR1	mRNA
circRNA297	down	-3.37089	0.0305847	yes	chr9	126533034	126540927	circRNA	ENSSSCG00000015485	mRNA
circRNA598	up	4.74496	0.0306206	yes	chr5	4840164	4840492	circRNA	SLC25A17	mRNA
circRNA3562	up	3.3399	0.030643	yes	chr17	36480170	36487214	circRNA	ATRN	mRNA
circRNA2700	up	4.18825	0.0306552	yes	chr7	102337721	102350409	circRNA	PSEN1	mRNA
circRNA3355	up	2.36677	0.0306625	yes	chr18	19948558	19949999	circRNA	UBE2H	mRNA
circRNA5716	up	3.2904	0.0306888	yes	chr10	45074611	45074872	circRNA	MAP3K8	mRNA
circRNA1483	up	1.81261	0.0307341	yes	chr18	42001004	42017561	circRNA	SEPT7	mRNA
circRNA3224	down	-2.35416	0.0307461	yes	chr3	110316892	110374835	circRNA	CRIM1	mRNA
circRNA3832	up	2.09212	0.0307775	yes	chr3	22145918	22156432	circRNA	ENSSSCG00000007826	mRNA
circRNA5484	up	2.96219	0.0307852	yes	chr5	93419320	93435648	circRNA	PLXNC1	mRNA
circRNA816	up	4.05293	0.0307968	yes	chr16	19080932	19086791	circRNA	ENSSSCG00000016810	mRNA
circRNA6642	down	-1.34928	0.030868	yes	chr1	103512707	103513105	circRNA	MTO1	mRNA
circRNA356	down	-1.3477	0.0308783	yes	chr13	131233764	131237882	circRNA	ENSSSCG00000011779	mRNA
circRNA4681	up	2.40731	0.0309026	yes	chr2	71674447	71678324	circRNA	TIMM44	mRNA
circRNA4011	up	2.63278	0.0309046	yes	chr9	31863848	31878919	circRNA	MTMR2	mRNA
circRNA3899	up	1.49321	0.0309489	yes	chr2	128512404	128516806	circRNA	DMXL1	mRNA
circRNA6634	up	2.30632	0.0309939	yes	chr1	35489847	35500672	circRNA	ENSSSCG00000004196	mRNA
circRNA6936	up	1.47303	0.0310183	yes	chr14	53859286	53862563	circRNA	PI4KA	mRNA
circRNA1381	up	3.21608	0.0310186	yes	chr2	147092790	147103587	circRNA	SLC23A1	mRNA
circRNA1806	up	3.21716	0.0310304	yes	chr14	95579373	95592563	circRNA	FAM35A	mRNA
circRNA3345	down	-1.60651	0.0310346	yes	chr18	5627894	5628060	circRNA	GALNT11	mRNA
circRNA2681	up	1.75185	0.0310541	yes	chrX	139925204	139946155	circRNA	MTM1	mRNA
circRNA377	down	-1.84835	0.0310905	yes	chr12	5063509	5067513	circRNA	PRPSAP1	mRNA
circRNA2879	up	2.62737	0.0310979	yes	chr9	40772946	40785836	circRNA	ENSSSCG00000025606	mRNA
circRNA4399	up	1.88298	0.0311136	yes	chr7	103015955	103017617	circRNA	COQ6	mRNA
circRNA1056	up	1.49477	0.0311707	yes	chr12	36509145	36544644	circRNA	TRIM37	mRNA
circRNA1871	up	1.1937	0.0311722	yes	chr7	53624775	53634272	circRNA	CTSH	mRNA
circRNA6557	up	1.09732	0.0311728	yes	chr3	39621256	39770346	circRNA	CREBBP	mRNA
circRNA2329	up	6.4358	0.0311762	yes	chr8	133746205	133751072	circRNA	BMPR1B	mRNA
circRNA3854	up	1.70707	0.031184	yes	chr3	90750338	90755491	circRNA	MTIF2	mRNA
circRNA2766	up	2.97484	0.031259	yes	chr3	29132306	29132509	circRNA	ABCC1	mRNA
circRNA6621	up	1.23649	0.0312641	yes	chr2	149781429	149792835	circRNA	RNF14	mRNA
circRNA1155	up	1.63383	0.0312956	yes	chr7	60959606	60968464	circRNA	ETFA	mRNA
circRNA3158	up	3.83921	0.0313156	yes	chr5	105247263	105265163	circRNA	ACSS3	mRNA
circRNA863	up	1.56544	0.0313268	yes	chrX	48711590	48716678	circRNA	CLCN5	mRNA
circRNA740	up	Inf	0.0313335	yes	chr8	39557310	39562193	circRNA	CORIN	mRNA
circRNA3692	up	1.65933	0.0314258	yes	chr7	33183955	33196881	circRNA	ZNF451	mRNA
circRNA2142	up	1.32815	0.0314627	yes	chr1	38719885	38795389	circRNA	PTPRK	mRNA
circRNA5995	down	-2.02416	0.0315004	yes	chr2	42240459	42240631	circRNA	ENSSSCG00000013351	mRNA
circRNA5566	up	1.50599	0.0315809	yes	chr2	87936746	87947700	circRNA	WDR41	mRNA
circRNA2015	up	2.5276	0.0316109	yes	chr4	136092583	136111159	circRNA	ENSSSCG00000006901	mRNA
circRNA4511	up	1.71087	0.0316299	yes	chr5	70335978	70339367	circRNA	WNK1	mRNA
circRNA1683	up	1.58693	0.0316402	yes	chr10	11881512	11887415	circRNA	RAB3GAP2	mRNA
circRNA4131	up	3.5099	0.0317456	yes	chr12	3371786	3372883	circRNA	USP36	mRNA
circRNA2667	up	4.84289	0.0318033	yes	chrX	41617864	41689033	circRNA	CASK	mRNA
circRNA1928	up	3.43029	0.0318698	yes	chr6	132155138	132173603	circRNA	ANKRD13C	mRNA
circRNA4818	down	-1.68331	0.0318986	yes	chr1	259395044	259395608	circRNA	TLE4	mRNA
circRNA5275	up	2.21665	0.0319143	yes	chr15	65907168	65910232	circRNA	ENSSSCG00000015857	mRNA
circRNA283	up	4.22855	0.0319339	yes	chr9	42882942	42883693	circRNA	ZC3H12C	mRNA
circRNA6946	up	3.56028	0.0319691	yes	chr14	83122838	83295682	circRNA	ADK	mRNA
circRNA2101	up	2.66304	0.0320007	yes	chr2	69289811	69290133	circRNA	PPAN	mRNA
circRNA4274	down	-5.15971	0.0321782	yes	chr15	139207889	139211780	circRNA	SERPINE2	mRNA
circRNA1529	up	3.66277	0.032306	yes	chr8	29238207	29264919	circRNA	ARAP2	mRNA
circRNA3716	up	1.72746	0.0323203	yes	chr7	128857556	128858931	circRNA	CDC42BPB	mRNA
circRNA12	up	1.17902	0.0323625	yes	chr7	69842801	69844102	circRNA	BAZ1A	mRNA
circRNA5349	up	Inf	0.0323801	yes	chr14	54077717	54080691	circRNA	P2RX6	mRNA
circRNA1685	up	2.86336	0.0324109	yes	chr10	18149844	18187909	circRNA	AKT3	mRNA
circRNA2198	up	5.3194	0.0324267	yes	chr1	269939905	269975028	circRNA	STX17	mRNA
circRNA4545	down	-6.16879	0.0324303	yes	chr4	39264389	39276176	circRNA	SNX31	mRNA
circRNA2423	down	-2.03699	0.0324387	yes	chr12	19366398	19367156	circRNA	ENSSSCG00000017366	mRNA
circRNA1744	up	1.01991	0.0324969	yes	chr15	62005102	62045562	circRNA	RBPMS	mRNA
circRNA2676	down	-1.05732	0.0325607	yes	chrX	109516554	109521838	circRNA	PLS3	mRNA
circRNA2803	up	2.34255	0.0325783	yes	chr2	53232486	53235771	circRNA	WEE1	mRNA
circRNA4718	down	-4.36247	0.0325931	yes	chr1	16870879	16871069	circRNA	ESR1	mRNA
circRNA445	up	Inf	0.0326002	yes	chr17	51680010	51681422	circRNA	IFT52	mRNA
circRNA394	up	2.33697	0.0326194	yes	chr12	48125504	48128160	circRNA	SLC6A4	mRNA
circRNA4116	up	1.96726	0.0326303	yes	chr13	146879487	146886361	circRNA	PDIA5	mRNA
circRNA5022	up	1.01732	0.0327499	yes	chr13	30995104	31005089	circRNA	ZDHHC3	mRNA
circRNA5185	down	-1.02084	0.0327605	yes	chr10	54048970	54054083	circRNA	YME1L1	mRNA
circRNA4996	up	4.63597	0.0327721	yes	chr8	108386043	108438354	circRNA	SPATA5	mRNA
circRNA3097	down	-1.82051	0.0327918	yes	chr6	16187291	16190862	circRNA	NOB1	mRNA
circRNA5859	up	1.54223	0.0328787	yes	chr6	99170339	99171392	circRNA	GREB1L	mRNA
circRNA4606	up	1.9158	0.0328907	yes	chr3	42794220	42812080	circRNA	ENSSSCG00000008060	mRNA
circRNA3071	up	1.33086	0.0329284	yes	chrX	73967201	74010804	circRNA	CH242-123K13.1	mRNA
circRNA4209	up	2.53851	0.032941	yes	chr17	36391525	36402917	circRNA	ATRN	mRNA
circRNA1540	up	2.18279	0.0329735	yes	chr8	50518546	50565554	circRNA	RAPGEF2	mRNA
circRNA2158	up	4.36019	0.0329752	yes	chr1	93078497	93084768	circRNA	ME1	mRNA
circRNA6169	down	-1.44719	0.0329787	yes	chr13	28581791	28598316	circRNA	TRAK1	mRNA
circRNA1982	down	-1.45826	0.0329789	yes	chr4	39143287	39143706	circRNA	PABPC1	mRNA
circRNA1661	down	-1.38784	0.0329819	yes	chr12	62327525	62329115	circRNA	ENSSSCG00000018034	mRNA
circRNA4241	down	-3.12738	0.0330943	yes	chr16	71750036	71751058	circRNA	CYFIP2	mRNA
circRNA3702	up	1.38964	0.0331981	yes	chr7	91932958	91952828	circRNA	CHD2	mRNA
circRNA4397	up	3.28979	0.0332787	yes	chr7	102213520	102222290	circRNA	ENSSSCG00000028663	mRNA
circRNA6427	up	1.65761	0.0333584	yes	chr7	62829756	62836071	circRNA	PTPN9	mRNA
circRNA3174	up	1.4983	0.0334168	yes	chr4	78447703	78463765	circRNA	ENSSSCG00000025087	mRNA
circRNA1445	down	-3.7658	0.0334271	yes	chr1	265189347	265197520	circRNA	MELK	mRNA
circRNA6448	down	-1.20939	0.0334356	yes	chr6	32344546	32408749	circRNA	PHKB	mRNA
circRNA2529	up	2.98096	0.0334851	yes	chr16	25411218	25416980	circRNA	RICTOR	mRNA
circRNA5542	up	1.52588	0.0335456	yes	chr2	3029587	3039309	circRNA	PPP6R3	mRNA
circRNA5665	up	2.99396	0.0335789	yes	chr13	83142279	83179748	circRNA	CEP63	mRNA
circRNA6504	up	1.74606	0.0336336	yes	chr5	56928608	56955103	circRNA	AEBP2	mRNA
circRNA6281	up	1.77215	0.0336531	yes	chr17	43359995	43369268	circRNA	NCOA6	mRNA
circRNA3257	down	-2.08942	0.0336844	yes	chr2	66343766	66346098	circRNA	ENSSSCG00000013742	mRNA
circRNA62	up	1.27651	0.0337001	yes	chr5	988588	995484	circRNA	ENSSSCG00000024864	mRNA
circRNA3222	up	2.43903	0.0337468	yes	chr3	109447083	109459237	circRNA	PRKD3	mRNA
circRNA2352	up	1.20796	0.0337537	yes	chr13	33810570	33841548	circRNA	ENSSSCG00000011340	mRNA
circRNA1450	down	-3.15559	0.0337585	yes	chr1	283798123	283800217	circRNA	PTBP3	mRNA
circRNA340	down	-1.63672	0.0338304	yes	chr13	34916547	34919128	circRNA	QRICH1	mRNA
circRNA2620	up	2.33162	0.0338418	yes	chr14	67540897	67575848	circRNA	FAM13C	mRNA
circRNA6742	down	-2.24873	0.0338793	yes	chr8	43597516	43598582	circRNA	KIT	mRNA
circRNA1114	down	-1.15398	0.0339018	yes	chr14	43179929	43188512	circRNA	SPPL3	mRNA
ciRNA59	up	2.63899	0.033921	yes	chr1	303326534	303327125	ciRNA	NUP188	mRNA
circRNA1206	up	1.80186	0.0339417	yes	chr6	140604563	140639893	circRNA	ENSSSCG00000003828	mRNA
circRNA6129	up	2.06487	0.0340564	yes	chr9	110569231	110573023	circRNA	GNAI1	mRNA
circRNA1354	up	1.47219	0.0340801	yes	chr2	73355031	73393884	circRNA	MLLT1	mRNA
circRNA2716	up	1.20543	0.0340976	yes	chr6	71569930	71571984	circRNA	ENSSSCG00000003488	mRNA
circRNA1973	up	1.60646	0.0341002	yes	chr5	103616997	103738220	circRNA	ENSSSCG00000025663	mRNA
circRNA2650	down	-1.43932	0.0341114	yes	chrX	7258915	7262755	circRNA	WWC3	mRNA
circRNA24	up	2.16688	0.0341186	yes	chr7	116914567	116921217	circRNA	PTPN21	mRNA
circRNA2048	up	3.12023	0.0341288	yes	chr3	84394642	84411099	circRNA	ENSSSCG00000008382	mRNA
circRNA3730	down	-1.17106	0.0341429	yes	chr6	47905556	47905862	circRNA	PRKD2	mRNA
circRNA2393	up	2.92084	0.0341483	yes	chr13	143424512	143425499	circRNA	TFRC	mRNA
ciRNA212	up	1.68204	0.0342172	yes	chr8	55496635	55497744	ciRNA	TMA16	mRNA
circRNA1210	up	4.39204	0.0343657	yes	chr6	149027711	149033483	circRNA	FAF1	mRNA
circRNA1297	up	1.34393	0.0344021	yes	chr3	61514538	61527346	circRNA	PTCD3	mRNA
circRNA6036	up	2.35282	0.0344236	yes	chr1	45632972	45640532	circRNA	TBC1D32	mRNA
circRNA5387	up	3.01179	0.0344966	yes	chr14	141227241	141234375	circRNA	MCMBP	mRNA
circRNA4768	up	2.38631	0.0345304	yes	chr1	141486242	141494309	circRNA	ENSSSCG00000004684	mRNA
circRNA1920	up	1.72194	0.034589	yes	chr6	99153058	99155163	circRNA	GREB1L	mRNA
circRNA1876	up	1.53187	0.0346004	yes	chr7	62835978	62848707	circRNA	PTPN9	mRNA
circRNA2095	up	2.83618	0.0346103	yes	chr2	44087435	44093025	circRNA	SAAL1	mRNA
circRNA3478	up	1.81927	0.0346142	yes	chr13	144052007	144058426	circRNA	LRCH3	mRNA
circRNA289	down	-2.41319	0.0346526	yes	chr9	98631547	98648601	circRNA	ITGB8	mRNA
circRNA5378	down	-3.26905	0.0347073	yes	chr14	114517171	114520327	circRNA	ENSSSCG00000010476	mRNA
circRNA2992	up	3.01574	0.034754	yes	chr17	45690868	45697572	circRNA	RBL1	mRNA
circRNA299	up	4.58232	0.0347684	yes	chr9	128129181	128170463	circRNA	ENSSSCG00000015499	mRNA
circRNA5428	down	-1.99733	0.0348071	yes	chr7	45100111	45100555	circRNA	SLC29A1	mRNA
circRNA789	up	5.08551	0.0348644	yes	chr11	52164913	52174646	circRNA	ENSSSCG00000009465	mRNA
circRNA1062	down	-1.09244	0.0349006	yes	chr12	56174667	56184183	circRNA	MYH10	mRNA
circRNA244	down	-3.00033	0.0349503	yes	chr1	265189347	265213158	circRNA	MELK	mRNA
circRNA5779	up	3.46808	0.0350418	yes	chr14	81015098	81081838	circRNA	ENSSSCG00000023130	mRNA
circRNA1814	up	1.53923	0.0351189	yes	chr14	118607796	118609579	circRNA	ZFYVE27	mRNA
circRNA4710	up	2.07313	0.0352252	yes	chr2	145419860	145458183	circRNA	KLHL3	mRNA
circRNA444	up	1.63593	0.0352443	yes	chr17	44400340	44403057	circRNA	RBM39	mRNA
circRNA937	up	1.23153	0.0354405	yes	chr3	75987372	76044136	circRNA	ENSSSCG00000008335	mRNA
circRNA4128	up	1.09847	0.0354949	yes	chr13	216655489	216687050	circRNA	HSF2BP	mRNA
circRNA477	up	3.6503	0.0355152	yes	chr15	115494426	115497557	circRNA	AOX1	mRNA
circRNA4192	down	-1.93722	0.0355748	yes	chr10	49667206	49673847	circRNA	ENSSSCG00000011041	mRNA
circRNA3968	up	1.16462	0.0355983	yes	chr1	269120143	269136132	circRNA	TGFBR1	mRNA
circRNA634	up	Inf	0.0356817	yes	chr3	75151124	75151758	circRNA	ADD2	mRNA
circRNA5165	up	1.16492	0.0357139	yes	chr10	15170634	15176883	circRNA	WDR26	mRNA
circRNA4837	up	2.31129	0.0358358	yes	chr1	303325519	303326132	circRNA	NUP188	mRNA
circRNA1737	down	-1.87023	0.0358531	yes	chr15	19259257	19263276	circRNA	RAB3GAP1	mRNA
circRNA638	down	-1.59441	0.0358793	yes	chr3	100584279	100593451	circRNA	PRKCE	mRNA
circRNA2470	up	2.21656	0.0358987	yes	chr11	86717931	86727947	circRNA	RASA3	mRNA
circRNA5958	up	3.23319	0.0359542	yes	chr3	54745413	54750702	circRNA	IL1R1	mRNA
circRNA3191	up	1.60891	0.0359652	yes	chr4	117897403	117906153	circRNA	ST7L	mRNA
circRNA592	up	1.46726	0.0359756	yes	chr6	146619070	146622749	circRNA	LRP8	mRNA
circRNA2951	up	4.69285	0.0360138	yes	chr12	37865153	37866104	circRNA	INTS2	mRNA
circRNA5438	up	1.41476	0.0360493	yes	chr7	97005367	97156735	circRNA	GPHN	mRNA
circRNA4662	up	2.20828	0.0360798	yes	chr2	3020147	3022317	circRNA	PPP6R3	mRNA
circRNA6035	up	2.25453	0.0361131	yes	chr1	38479516	38611471	circRNA	PTPRK	mRNA
circRNA2786	down	-2.09177	0.0361292	yes	chr3	110272999	110292379	circRNA	CRIM1	mRNA
circRNA5169	up	2.27329	0.0361549	yes	chr10	18210922	18250156	circRNA	AKT3	mRNA
circRNA5809	down	-1.16651	0.0363161	yes	chr7	62801435	62805027	circRNA	PTPN9	mRNA
circRNA3658	up	1.05867	0.0363601	yes	chr14	118599382	118607071	circRNA	ZFYVE27	mRNA
circRNA3597	up	1.87637	0.0363605	yes	chr15	66048762	66072656	circRNA	SAP130	mRNA
circRNA6749	up	1.03828	0.0363702	yes	chr8	93237744	93240931	circRNA	NAA15	mRNA
circRNA2175	up	2.02382	0.036427	yes	chr1	146916670	146917322	circRNA	THBS1	mRNA
circRNA3608	up	1.78535	0.0365126	yes	chr15	115438915	115445769	circRNA	AOX1	mRNA
circRNA5105	down	-1.07586	0.0365757	yes	chr12	17084827	17085916	circRNA	KANSL1	mRNA
circRNA841	up	1.61048	0.0366052	yes	chr14	42730101	42732887	circRNA	ENSSSCG00000009898	mRNA
circRNA2699	up	2.06236	0.0367224	yes	chr7	102278724	102279038	circRNA	PSEN1	mRNA
circRNA6833	up	2.25413	0.0367287	yes	chr12	52161469	52164213	circRNA	ANKFY1	mRNA
circRNA368	up	3.47009	0.03673	yes	chr13	202631408	202632177	circRNA	LTN1	mRNA
circRNA3993	up	Inf	0.036744	yes	chr18	26175392	26210863	circRNA	CADPS2	mRNA
circRNA2325	up	Inf	0.0367705	yes	chr8	108981923	108985193	circRNA	KIAA1109	mRNA
circRNA5636	up	2.16872	0.0367981	yes	chr9	115748259	115757000	circRNA	SRPK2	mRNA
circRNA5231	up	3.6894	0.0368495	yes	chr16	19133150	19136391	circRNA	ENSSSCG00000016810	mRNA
circRNA3263	up	1.85066	0.0368924	yes	chr2	81132642	81137002	circRNA	ZFP2	mRNA
circRNA2079	up	3.00352	0.0369229	yes	chr3	134668112	134697787	circRNA	NOL10	mRNA
circRNA389	down	-1.4484	0.0369429	yes	chr12	44352663	44356138	circRNA	ZNF207	mRNA
circRNA4531	up	2.23239	0.0370152	yes	chr5	105210066	105213006	circRNA	ACSS3	mRNA
circRNA2155	up	2.6422	0.0371263	yes	chr1	83316653	83323066	circRNA	SEC63	mRNA
circRNA1927	up	1.06349	0.0371431	yes	chr6	113109417	113122204	circRNA	FHOD3	mRNA
circRNA3657	up	1.18327	0.0371598	yes	chr14	117614090	117622018	circRNA	TM9SF3	mRNA
circRNA6787	up	1.63969	0.0372896	yes	chr13	117594277	117605927	circRNA	PHC3	mRNA
circRNA6404	up	1.18711	0.0373002	yes	chrX	140034602	140038164	circRNA	MTMR1	mRNA
circRNA2203	down	-1.47391	0.0373056	yes	chr1	293488318	293492639	circRNA	RAB14	mRNA
circRNA3372	up	2.22121	0.0373097	yes	chr9	9307763	9320696	circRNA	C2CD3	mRNA
circRNA2648	down	-2.3581	0.0373204	yes	chr14	145557672	145558450	circRNA	FAM53B	mRNA
circRNA2818	up	1.48914	0.0373267	yes	chr2	150641324	150650232	circRNA	ARHGAP26	mRNA
circRNA6842	up	1.76626	0.0373269	yes	chr11	18532004	18534308	circRNA	PHF11	mRNA
circRNA2618	up	1.12424	0.0373856	yes	chr14	53911449	53915641	circRNA	PI4KA	mRNA
circRNA5301	up	1.2498	0.0374337	yes	chr15	124628985	124693334	circRNA	KANSL1L	mRNA
circRNA6198	up	1.99971	0.0374787	yes	chr13	131107423	131119487	circRNA	YEATS2	mRNA
circRNA732	up	2.22211	0.0375164	yes	chr9	150354490	150377795	circRNA	GRB10	mRNA
circRNA3807	up	2.92376	0.037572	yes	chr4	75154569	75166263	circRNA	ARMC1	mRNA
circRNA456	up	1.88738	0.0375762	yes	chr16	36676971	36698971	circRNA	SKIV2L2	mRNA
circRNA5300	up	3.42637	0.0375974	yes	chr15	124584175	124629189	circRNA	KANSL1L	mRNA
circRNA2909	up	1.50522	0.0376315	yes	chr8	42218166	42263267	circRNA	ENSSSCG00000008836	mRNA
circRNA1327	down	-1.23295	0.0376445	yes	chr3	130892424	130921437	circRNA	ENSSSCG00000008621	mRNA
circRNA5795	down	-1.23091	0.037733	yes	chrX	126963525	126975426	circRNA	INTS6L	mRNA
circRNA3004	up	2.09672	0.0377763	yes	chr16	52506894	52517720	circRNA	MRPS27	mRNA
circRNA5403	up	1.49352	0.0377843	yes	chrX	44679924	44683888	circRNA	KDM6A	mRNA
circRNA3672	up	1.82831	0.0378847	yes	chrX	40497155	40503864	circRNA	MED14	mRNA
circRNA54	up	3.18907	0.0380813	yes	chr6	122000800	122037550	circRNA	ADGRL2	mRNA
circRNA664	up	1.47419	0.0380825	yes	chr2	86283747	86291987	circRNA	ANKDD1B	mRNA
circRNA4021	up	Inf	0.0380826	yes	chr9	55804911	55808522	circRNA	ENSSSCG00000024299	mRNA
circRNA2632	up	2.31836	0.0380835	yes	chr14	104607342	104655416	circRNA	PCDH15	mRNA
circRNA635	up	6.05251	0.0381492	yes	chr3	75746945	75752324	circRNA	C2orf42	mRNA
circRNA480	up	1.45335	0.0382291	yes	chr15	139690937	139706158	circRNA	ENSSSCG00000016234	mRNA
circRNA3605	up	1.19873	0.038296	yes	chr15	106836857	106854393	circRNA	GLS	mRNA
circRNA1781	up	2.26356	0.0383108	yes	chr14	37732669	37745313	circRNA	FBXW8	mRNA
circRNA2610	down	-1.54397	0.0383585	yes	chr14	34843126	34867030	circRNA	ENSSSCG00000009837	mRNA
circRNA5682	up	2.95726	0.0385659	yes	chr13	145370141	145381220	circRNA	ENSSSCG00000021656	mRNA
circRNA5294	up	2.18485	0.0387313	yes	chr15	117782782	117789457	circRNA	ICA1L	mRNA
circRNA5295	up	2.18485	0.0387313	yes	chr15	117785041	117789457	circRNA	ICA1L	mRNA
circRNA6438	up	1.63199	0.0389867	yes	chr7	104147580	104153432	circRNA	NEK9	mRNA
circRNA4087	up	2.23453	0.038992	yes	chr13	31985427	31995556	circRNA	ENSSSCG00000005722	mRNA
circRNA443	down	-1.726	0.038994	yes	chr17	43051169	43053075	circRNA	ITCH	mRNA
circRNA5162	up	1.31906	0.0391581	yes	chr10	7761050	7765693	circRNA	ENSSSCG00000028407	mRNA
circRNA258	up	2.80598	0.0391629	yes	chr18	8521834	8523971	circRNA	KIAA1147	mRNA
circRNA5917	down	-1.05556	0.0391823	yes	chr4	15919603	15931051	circRNA	TMEM65	mRNA
circRNA3288	up	1.82875	0.0392169	yes	chr1	45701230	45737883	circRNA	TBC1D32	mRNA
circRNA1729	up	5.46186	0.0393021	yes	chr16	34246103	34249910	circRNA	ITGA2	mRNA
circRNA3370	up	1.34701	0.0393097	yes	chr9	7128595	7143222	circRNA	NUP98	mRNA
circRNA1308	up	2.03562	0.0393333	yes	chr3	92480216	92481403	circRNA	PSME4	mRNA
circRNA1626	up	5.87715	0.0393446	yes	chr13	205241764	205256332	circRNA	TIAM1	mRNA
circRNA3915	up	2.16436	0.0393507	yes	chr1	45737787	45787500	circRNA	TBC1D32	mRNA
circRNA5853	up	2.83128	0.0394277	yes	chr6	85446257	85451841	circRNA	ENSSSCG00000024887	mRNA
circRNA4168	up	2.28688	0.0394904	yes	chr11	72326151	72345641	circRNA	ENSSSCG00000009502	mRNA
circRNA2478	up	Inf	0.0395165	yes	chr10	13459313	13461784	circRNA	TAF1A	mRNA
circRNA4583	up	1.07336	0.0395192	yes	chr4	114445064	114447905	circRNA	ATP1A1	mRNA
circRNA1132	up	3.88223	0.0395684	yes	chrX	144149375	144164127	circRNA	PRKX	mRNA
circRNA4888	up	2.57969	0.0395731	yes	chr9	19251282	19287128	circRNA	ENSSSCG00000014902	mRNA
circRNA6904	down	-1.67122	0.0395753	yes	chr15	80704325	80707512	circRNA	ENSSSCG00000015909	mRNA
circRNA5642	up	1.1919	0.0396621	yes	chr8	18863859	18876241	circRNA	DHX15	mRNA
circRNA2950	up	2.37136	0.0397033	yes	chr12	36642014	36651263	circRNA	DHX40	mRNA
ciRNA31	up	2.33207	0.0397669	yes	chr12	1403301	1403684	ciRNA	SLC38A10	mRNA
circRNA1315	up	1.61403	0.0397718	yes	chr3	114030015	114039242	circRNA	BIRC6	mRNA
circRNA5820	down	-4.59209	0.0397884	yes	chr7	104454726	104465395	circRNA	ENSSSCG00000021606	mRNA
circRNA6010	up	1.69938	0.0397993	yes	chr2	86328811	86340614	circRNA	POC5	mRNA
circRNA2548	up	1.36333	0.0398088	yes	chr15	34890619	34917823	circRNA	ENSSSCG00000027791	mRNA
circRNA4121	up	3.79221	0.0398408	yes	chr13	172674536	172683907	circRNA	ENSSSCG00000021732	mRNA
circRNA4492	up	1.53133	0.0399295	yes	chr5	29892331	29898067	circRNA	MON2	mRNA
circRNA4400	down	-3.53557	0.039947	yes	chr7	104451564	104465395	circRNA	ENSSSCG00000021606	mRNA
circRNA221	up	5.9857	0.0400098	yes	chr1	110340582	110351249	circRNA	ME2	mRNA
circRNA2044	up	3.35854	0.0400804	yes	chr3	58155127	58186175	circRNA	MGAT4A	mRNA
circRNA805	down	-4.72889	0.0401841	yes	chr10	54179586	54179891	circRNA	MASTL	mRNA
circRNA4331	up	Inf	0.0401984	yes	chrX	17011519	17030595	circRNA	MAP3K15	mRNA
ciRNA42	up	7.55572	0.0402808	yes	chr9	7568871	7569099	ciRNA	INPPL1	mRNA
circRNA1225	down	-3.00755	0.0403717	yes	chr5	35794493	35795037	circRNA	ENSSSCG00000000486	mRNA
circRNA1470	up	1.10842	0.0404294	yes	chr18	20672465	20685978	circRNA	TNPO3	mRNA
circRNA1694	down	-6.29319	0.0405778	yes	chr10	49672328	49673847	circRNA	ENSSSCG00000011041	mRNA
circRNA2290	up	1.65681	0.0406067	yes	chr9	143311708	143336580	circRNA	ENSSSCG00000015587	mRNA
circRNA320	up	2.26576	0.0407015	yes	chr8	83700344	83700678	circRNA	ENSSSCG00000009023	mRNA
circRNA1851	up	1.09821	0.0408249	yes	chr7	94024	99219	circRNA	EXOC2	mRNA
circRNA2890	up	1.66157	0.0408439	yes	chr9	120402054	120404864	circRNA	CUL1	mRNA
circRNA5126	down	-1.16926	0.0409625	yes	chr12	56098880	56109010	circRNA	ENSSSCG00000024527	mRNA
circRNA5370	up	1.92103	0.0409647	yes	chr14	104420478	104457132	circRNA	PCDH15	mRNA
circRNA2166	up	1.81125	0.0409888	yes	chr1	125491718	125492866	circRNA	ADAM10	mRNA
circRNA5439	up	2.90824	0.0409905	yes	chr7	103038115	103043524	circRNA	ENTPD5	mRNA
circRNA48	up	1.95717	0.0411053	yes	chr6	99489396	99506112	circRNA	MIB1	mRNA
circRNA5144	up	4.72088	0.0411487	yes	chr11	53962500	53982467	circRNA	MYCBP2	mRNA
circRNA6880	up	1.04031	0.0411908	yes	chr17	43605860	43631612	circRNA	TRPC4AP	mRNA
circRNA1426	up	1.65973	0.0412038	yes	chr1	145462507	145486713	circRNA	INO80	mRNA
ciRNA214	up	3.83389	0.0413043	yes	chr13	100731326	100731809	ciRNA	MBNL1	mRNA
circRNA33	up	Inf	0.0413117	yes	chr6	18059965	18063156	circRNA	CSNK2A2	mRNA
circRNA3780	up	1.93981	0.0413257	yes	chr5	56920927	56955103	circRNA	AEBP2	mRNA
circRNA4616	down	-1.40338	0.0413302	yes	chr3	49146846	49149067	circRNA	STARD7	mRNA
circRNA2843	down	-1.10772	0.041442	yes	chr1	145429099	145436055	circRNA	INO80	mRNA
circRNA3629	up	3.46481	0.0414473	yes	chr14	48085721	48100093	circRNA	PITPNB	mRNA
circRNA5255	up	2.15591	0.0414845	yes	chr16	54825523	54837341	circRNA	CPEB4	mRNA
circRNA5205	up	1.64388	0.0415009	yes	chr17	36500876	36512513	circRNA	ATRN	mRNA
circRNA3895	up	Inf	0.0415455	yes	chr2	107559601	107578780	circRNA	LIX1	mRNA
circRNA943	up	1.4104	0.0415662	yes	chr3	140617751	140630343	circRNA	TSSC1	mRNA
circRNA4906	down	-2.75456	0.0415874	yes	chr9	53837571	53858732	circRNA	ENSSSCG00000015135	mRNA
circRNA6366	up	1.79136	0.0415938	yes	chr14	77097756	77103746	circRNA	ENSSSCG00000010236	mRNA
circRNA968	up	3.05873	0.0416202	yes	chr1	23262198	23262358	circRNA	ENSSSCG00000026681	mRNA
circRNA3970	up	3.17531	0.0416704	yes	chr1	270111786	270143605	circRNA	ERP44	mRNA
circRNA1289	down	-2.40589	0.0417441	yes	chr3	33342594	33345177	circRNA	ATF7IP2	mRNA
circRNA4436	up	1.60955	0.0417998	yes	chr6	71829412	71829635	circRNA	PQLC2	mRNA
circRNA218	down	-1.10835	0.0418549	yes	chr1	89946850	89947529	circRNA	HDAC2	mRNA
ciRNA101	up	Inf	0.0418923	yes	chr12	1446545	1446902	ciRNA	CEP131	mRNA
circRNA4137	up	1.46245	0.0419038	yes	chr12	27547982	27562642	circRNA	MBTD1	mRNA
circRNA4136	up	1.67677	0.0419244	yes	chr12	23496794	23500826	circRNA	CACNB1	mRNA
circRNA5158	up	1.47955	0.0419358	yes	chr10	7643479	7648121	circRNA	ENSSSCG00000010811	mRNA
circRNA3038	up	1.37502	0.0419637	yes	chr14	54611206	54612967	circRNA	HIRA	mRNA
circRNA6611	down	-3.79908	0.0419887	yes	chr2	83206943	83207326	circRNA	SIMC1	mRNA
circRNA6199	up	1.68266	0.042011	yes	chr13	131164706	131165655	circRNA	YEATS2	mRNA
circRNA3810	up	1.87978	0.0421138	yes	chr4	81094603	81101895	circRNA	SDCBP	mRNA
circRNA3205	up	1.13284	0.0421371	yes	chr3	49831613	49842690	circRNA	ENSSSCG00000023884	mRNA
circRNA2884	up	1.00585	0.0421518	yes	chr9	71529355	71535736	circRNA	MDM4	mRNA
circRNA6801	up	3.93116	0.0421606	yes	chr13	155549170	155553861	circRNA	ENSSSCG00000011913	mRNA
circRNA4488	up	1.38976	0.0421793	yes	chr5	17121476	17125911	circRNA	DIP2B	mRNA
circRNA4525	up	1.40949	0.0422199	yes	chr5	88132144	88158602	circRNA	UHRF1BP1L	mRNA
circRNA1922	down	-2.96208	0.042259	yes	chr6	100723128	100726469	circRNA	CABLES1	mRNA
circRNA1914	up	1.5194	0.0424057	yes	chr6	88173912	88196465	circRNA	MACF1	mRNA
circRNA5442	up	1.86219	0.0424781	yes	chr6	14376991	14384261	circRNA	AP1G1	mRNA
circRNA4544	up	1.80094	0.042512	yes	chr4	37761441	37770008	circRNA	ENSSSCG00000022479	mRNA
circRNA148	up	1.06129	0.0425623	yes	chr3	62266398	62268465	circRNA	GGCX	mRNA
circRNA2028	up	1.34967	0.0426584	yes	chr3	11499694	11505958	circRNA	GTF2I	mRNA
circRNA5401	up	1.61627	0.042729	yes	chrX	41408747	41433282	circRNA	CASK	mRNA
circRNA2566	up	2.72641	0.0428118	yes	chr15	111197129	111198713	circRNA	ENSSSCG00000016068	mRNA
circRNA2689	up	2.11184	0.042819	yes	chr7	35702432	35743335	circRNA	ANKS1A	mRNA
circRNA1989	up	1.55812	0.0429467	yes	chr4	67752436	67762470	circRNA	UBE2W	mRNA
circRNA1133	up	1.50789	0.0429707	yes	chr7	125461	130444	circRNA	EXOC2	mRNA
circRNA3776	up	2.32902	0.0431196	yes	chr5	35894045	35896464	circRNA	MDM2	mRNA
circRNA254	up	1.20378	0.0431871	yes	chr1	303004139	303004803	circRNA	SPTAN1	mRNA
circRNA2461	up	3.68352	0.0432271	yes	chr11	26425715	26430206	circRNA	SUGT1	mRNA
circRNA4065	up	3.23001	0.0432738	yes	chr8	87613961	87623704	circRNA	SLC10A7	mRNA
circRNA2285	up	Inf	0.0433199	yes	chr9	132912707	132914632	circRNA	SOAT1	mRNA
circRNA957	up	1.09572	0.0435322	yes	chr2	87947590	87964141	circRNA	WDR41	mRNA
circRNA5079	up	3.33711	0.0436428	yes	chr13	141247025	141251620	circRNA	LSG1	mRNA
circRNA3419	up	2.94682	0.0437177	yes	chr8	32701671	32705612	circRNA	PDS5A	mRNA
circRNA5069	up	1.65506	0.0437332	yes	chr13	130118894	130135883	circRNA	ENSSSCG00000011772	mRNA
circRNA636	up	Inf	0.0437867	yes	chr3	84402627	84405342	circRNA	ENSSSCG00000008382	mRNA
circRNA2353	up	1.13439	0.0438566	yes	chr13	33815459	33841548	circRNA	ENSSSCG00000011340	mRNA
circRNA6461	up	1.67327	0.0439564	yes	chr6	69151420	69159515	circRNA	DDI2	mRNA
circRNA6793	up	3.63985	0.0439657	yes	chr13	132987062	132989440	circRNA	SENP2	mRNA
circRNA1994	up	2.51903	0.0440287	yes	chr4	81099379	81107008	circRNA	SDCBP	mRNA
circRNA641	down	-3.34316	0.0441277	yes	chr3	102834961	102835561	circRNA	ENSSSCG00000008456	mRNA
circRNA4364	down	-3.70173	0.0441451	yes	chr7	34209152	34209547	circRNA	ENSSSCG00000001510	mRNA
circRNA6906	down	-5.26686	0.0441549	yes	chr15	86954920	86961619	circRNA	DCAF17	mRNA
circRNA2956	down	-1.1041	0.0441826	yes	chr12	56098880	56103940	circRNA	ENSSSCG00000024527	mRNA
circRNA417	down	-3.82612	0.0442917	yes	chr10	16614303	16614557	circRNA	PARP1	mRNA
circRNA1401	up	Inf	0.044396	yes	chr1	82008874	82014706	circRNA	ENSSSCG00000004371	mRNA
circRNA4353	up	3.41696	0.0444409	yes	chr7	17209021	17252211	circRNA	CDKAL1	mRNA
circRNA6237	down	-1.04259	0.0446132	yes	chr12	54838060	54840404	circRNA	ENSSSCG00000017935	mRNA
circRNA3139	up	1.11812	0.0448171	yes	chr5	16683843	16694950	circRNA	LARP4	mRNA
circRNA2197	up	5.02656	0.0448853	yes	chr1	267559105	267572799	circRNA	TMOD1	mRNA
circRNA6356	up	3.3017	0.0450217	yes	chr14	41968498	41969198	circRNA	ENSSSCG00000009885	mRNA
circRNA6171	up	1.71614	0.0450307	yes	chr13	33146950	33157534	circRNA	SETD2	mRNA
circRNA2354	up	1.04191	0.0451567	yes	chr13	33821362	33841548	circRNA	ENSSSCG00000011340	mRNA
circRNA5630	up	1.6903	0.0451601	yes	chr9	52673623	52686429	circRNA	ARHGEF12	mRNA
circRNA5483	up	1.30007	0.0451648	yes	chr5	93402344	93405323	circRNA	PLXNC1	mRNA
circRNA6219	up	1.70456	0.045203	yes	chr12	16187562	16190557	circRNA	ENSSSCG00000017303	mRNA
circRNA2454	up	3.23271	0.0452041	yes	chr11	14244134	14245828	circRNA	STOML3	mRNA
circRNA5431	down	-1.22681	0.0453283	yes	chr7	62827072	62830084	circRNA	PTPN9	mRNA
circRNA5215	up	7.83808	0.0453294	yes	chr17	45685173	45691034	circRNA	RBL1	mRNA
circRNA6731	up	2.4906	0.0453428	yes	chr8	579774	602283	circRNA	POLN	mRNA
circRNA4790	up	2.16223	0.0453798	yes	chr1	184434545	184435437	circRNA	CORO2B	mRNA
circRNA5389	up	4.62259	0.0454566	yes	chr14	146898284	146919909	circRNA	FANK1	mRNA
circRNA438	up	1.26621	0.0455391	yes	chr17	9436690	9442407	circRNA	FAT1	mRNA
circRNA929	up	2.77889	0.0455872	yes	chr3	38961092	38962018	circRNA	DNAJA3	mRNA
circRNA2229	up	1.98849	0.0457771	yes	chr18	43994959	44140528	circRNA	ENSSSCG00000024754	mRNA
circRNA6863	up	1.4077	0.0460619	yes	chr10	31988490	32008568	circRNA	ENSSSCG00000010950	mRNA
circRNA3607	up	1.76673	0.0461219	yes	chr15	112575780	112581920	circRNA	ENSSSCG00000016079	mRNA
circRNA2105	down	-1.25902	0.0461287	yes	chr2	73695861	73696503	circRNA	ENSSSCG00000013533	mRNA
circRNA4054	up	2.76876	0.0461678	yes	chr8	39412477	39415359	circRNA	ATP10D	mRNA
circRNA1809	up	Inf	0.0461754	yes	chr14	104732283	104734411	circRNA	PCDH15	mRNA
circRNA3806	up	1.49538	0.0462581	yes	chr4	75145634	75154660	circRNA	ARMC1	mRNA
circRNA2335	up	1.40239	0.0462644	yes	chr8	141514558	141535238	circRNA	PTPN13	mRNA
circRNA366	up	Inf	0.0462659	yes	chr13	186597644	186597970	circRNA	ENSSSCG00000012001	mRNA
circRNA3314	down	-1.42686	0.0463081	yes	chr1	180989521	180998696	circRNA	IGDCC4	mRNA
circRNA482	up	2.49597	0.0465185	yes	chr15	139961836	139963376	circRNA	ENSSSCG00000016237	mRNA
circRNA4177	up	1.79436	0.0465732	yes	chr10	17146793	17170362	circRNA	CDC42BPA	mRNA
circRNA6098	down	-5.6848	0.0465777	yes	chr18	9751490	9753741	circRNA	DENND2A	mRNA
circRNA1653	up	2.22376	0.0466493	yes	chr12	45493347	45497578	circRNA	NF1	mRNA
circRNA1589	up	1.69165	0.0467101	yes	chr13	33827278	33841548	circRNA	ENSSSCG00000011340	mRNA
circRNA3147	up	4.46056	0.0467347	yes	chr5	70372892	70379709	circRNA	WNK1	mRNA
circRNA544	up	1.30448	0.0467637	yes	chrX	101666930	101668730	circRNA	TBC1D8B	mRNA
circRNA3943	up	2.08889	0.0467817	yes	chr1	148459942	148497434	circRNA	SPRED1	mRNA
circRNA479	up	3.63644	0.0468407	yes	chr15	126210353	126224575	circRNA	ENSSSCG00000016160	mRNA
circRNA3914	up	2.96471	0.046946	yes	chr1	45713269	45734427	circRNA	TBC1D32	mRNA
circRNA2029	up	Inf	0.0470662	yes	chr3	16325774	16335312	circRNA	ENSSSCG00000007733	mRNA
circRNA1204	up	3.21644	0.047112	yes	chr6	133782826	133792642	circRNA	WLS	mRNA
circRNA2242	up	1.63685	0.0471198	yes	chr9	13674798	13693595	circRNA	ENSSSCG00000014884	mRNA
circRNA1919	up	1.48021	0.0471445	yes	chr6	96969713	96973520	circRNA	ENSSSCG00000029030	mRNA
circRNA5463	up	1.48021	0.0471445	yes	chr6	96969871	96973520	circRNA	ENSSSCG00000029030	mRNA
circRNA2502	up	2.22936	0.0472039	yes	chr10	63455784	63475346	circRNA	CREM	mRNA
circRNA2958	up	1.50369	0.0472533	yes	chr11	317743	323483	circRNA	ENSSSCG00000029465	mRNA
circRNA6220	up	1.01421	0.0472753	yes	chr12	18735351	18742385	circRNA	EFTUD2	mRNA
circRNA1785	up	1.89972	0.0473059	yes	chr14	44640831	44661911	circRNA	ENSSSCG00000009944	mRNA
circRNA2263	up	Inf	0.0473847	yes	chr9	83273441	83288878	circRNA	SLC25A13	mRNA
circRNA6421	up	1.38611	0.0473989	yes	chr7	57542870	57555123	circRNA	HOMER2	mRNA
circRNA1455	up	1.709	0.0474009	yes	chr1	298262412	298299148	circRNA	ENSSSCG00000026555	mRNA
circRNA5775	up	1.77927	0.0474371	yes	chr14	49714739	49717414	circRNA	ENSSSCG00000028707	mRNA
circRNA1756	up	1.67585	0.0474598	yes	chr15	112201333	112260631	circRNA	ANKRD44	mRNA
circRNA931	up	1.64355	0.0475227	yes	chr3	43002921	43004246	circRNA	ENSSSCG00000008068	mRNA
circRNA4092	up	1.05252	0.047547	yes	chr13	51765369	51772223	circRNA	MAGI1	mRNA
circRNA872	down	-1.1707	0.0476022	yes	chr7	35115791	35116326	circRNA	RPS10	mRNA
circRNA763	up	2.13472	0.0476791	yes	chr13	144403406	144409204	circRNA	ENSSSCG00000026753	mRNA
circRNA3439	up	1.01581	0.0477225	yes	chr8	139806671	139815404	circRNA	HERC3	mRNA
circRNA6248	up	1.2566	0.0479094	yes	chr11	84964946	84974829	circRNA	ENSSSCG00000009551	mRNA
circRNA3662	up	2.18749	0.0479546	yes	chr14	141173275	141178363	circRNA	INPP5F	mRNA
circRNA4598	up	2.22502	0.0480143	yes	chr3	11444069	11449997	circRNA	GTF2I	mRNA
circRNA3599	up	1.63866	0.0480733	yes	chr15	73900098	73915735	circRNA	MARCH7	mRNA
circRNA2244	up	2.23107	0.0482622	yes	chr9	19259967	19269763	circRNA	ENSSSCG00000014902	mRNA
circRNA5186	down	-1.15656	0.0484339	yes	chr10	54051649	54057057	circRNA	YME1L1	mRNA
circRNA5959	up	1.09863	0.0484391	yes	chr3	59237678	59238332	circRNA	ANKRD39	mRNA
circRNA967	up	2.24939	0.0484428	yes	chr1	23026021	23034674	circRNA	ENSSSCG00000004123	mRNA
circRNA6177	down	-1.68588	0.0485307	yes	chr13	37486493	37499329	circRNA	POC1A	mRNA
circRNA3823	up	2.91512	0.0487063	yes	chr4	129789461	129792899	circRNA	AGL	mRNA
circRNA6658	up	1.71126	0.0487922	yes	chr1	145237109	145250816	circRNA	ENSSSCG00000004751	mRNA
circRNA1061	up	1.23185	0.048802	yes	chr12	48130101	48130320	circRNA	SLC6A4	mRNA
circRNA6435	up	1.61991	0.0489562	yes	chr7	97857713	97862766	circRNA	ZFYVE26	mRNA
circRNA4981	up	1.26299	0.0489676	yes	chr8	73375718	73382639	circRNA	ANKRD17	mRNA
circRNA2068	up	Inf	0.0490131	yes	chr3	126269305	126274496	circRNA	WDR35	mRNA
circRNA2597	up	1.87883	0.0490512	yes	chr14	10544559	10546610	circRNA	DOCK5	mRNA
circRNA3107	down	-5.56153	0.0491155	yes	chr6	69537600	69538970	circRNA	FAM131C	mRNA
circRNA1965	up	1.60306	0.0492206	yes	chr5	79940439	79950340	circRNA	SLC38A1	mRNA
circRNA5220	up	5.78461	0.049223	yes	chr17	55866818	55867387	circRNA	NCOA3	mRNA
circRNA2800	up	1.29823	0.0492317	yes	chr2	43651009	43664163	circRNA	UEVLD	mRNA
circRNA2598	down	-1.53398	0.0492497	yes	chr14	10633685	10663285	circRNA	KCTD9	mRNA
circRNA1837	up	1.70288	0.0495084	yes	chrX	51480081	51480504	circRNA	KDM5C	mRNA
circRNA5102	up	1.04046	0.0495317	yes	chr12	15242028	15275808	circRNA	MAP3K3	mRNA
circRNA528	up	1.86799	0.0495615	yes	chr14	136395036	136409692	circRNA	TRUB1	mRNA
circRNA3588	down	-1.12988	0.0495625	yes	chr15	19247885	19263276	circRNA	RAB3GAP1	mRNA
circRNA365	up	Inf	0.0496833	yes	chr13	167103118	167104720	circRNA	SENP7	mRNA
circRNA441	up	2.18759	0.0497299	yes	chr17	36464871	36467765	circRNA	ATRN	mRNA
circRNA6211	up	1.58144	0.0497352	yes	chr13	205198842	205213199	circRNA	TIAM1	mRNA
circRNA737	up	3.13507	0.049822	yes	chr8	31876392	31881213	circRNA	ENSSSCG00000008787	mRNA
circRNA5825	up	1.02717	0.0499034	yes	chr7	118961846	118978888	circRNA	ENSSSCG00000002436	mRNA
circRNA1839	up	1.35506	0.0499277	yes	chrX	53126261	53127827	circRNA	GNL3L	mRNA

## Sheet: host genes in oocyte
Supplementary Table 5. List of DECs and their host genes in oocytes.
Accession	Regulation	Log2fold_change	Pvalue	Significant	Chromosome	Start	End	CircType	GeneName	Hosting GeneType
ciRNA101	down	-Inf	0.000139714	yes	chr12	1446545	1446902	ciRNA	CEP131	mRNA
circRNA4020	down	-Inf	0.000268408	yes	chr9	53429478	53430275	circRNA	TECTA	mRNA
circRNA1798	down	-3.21617	0.000392856	yes	chr14	57501084	57501273	circRNA	ZP4	mRNA
ciRNA112	down	-Inf	0.000497002	yes	chr7	53460776	53461060	ciRNA	ADAMTS7	mRNA
circRNA3312	down	-Inf	0.000547978	yes	chr1	179860561	179865984	circRNA	ALPK2	mRNA
circRNA1797	down	-Inf	0.00096939	yes	chr14	57499158	57499966	circRNA	ZP4	mRNA
circRNA3005	down	-Inf	0.000971034	yes	chr16	60488446	60488684	circRNA	TENM2	mRNA
circRNA4846	down	-Inf	0.00103321	yes	chr18	8475706	8480154	circRNA	WEE2	mRNA
circRNA4355	down	-Inf	0.00114678	yes	chr7	20448339	20454004	circRNA	GPLD1	mRNA
circRNA2025	down	-Inf	0.00125718	yes	chr3	6348388	6361112	circRNA	KPNA7	mRNA
circRNA2364	down	-1.90157	0.00130282	yes	chr13	62890743	62890930	circRNA	CHL1	mRNA
circRNA2974	down	-Inf	0.00130322	yes	chr10	18123982	18140410	circRNA	AKT3	mRNA
circRNA3197	down	-Inf	0.00133692	yes	chr3	6348388	6350370	circRNA	KPNA7	mRNA
circRNA535	down	-Inf	0.00135394	yes	chrX	17024701	17030595	circRNA	MAP3K15	mRNA
circRNA2770	down	-Inf	0.0014538	yes	chr3	49203101	49204128	circRNA	ASTL	mRNA
circRNA4056	down	-Inf	0.00172286	yes	chr8	58669379	58682109	circRNA	ENSSSCG00000008909	mRNA
ciRNA92	down	-Inf	0.00173976	yes	chr18	8464158	8464451	ciRNA	WEE2	mRNA
circRNA3951	down	-Inf	0.00178402	yes	chr1	179856004	179872551	circRNA	ALPK2	mRNA
circRNA4549	down	-1.26295	0.00178769	yes	chr4	45335992	45342911	circRNA	ESRP1	mRNA
circRNA4323	down	-Inf	0.00183116	yes	chr14	136706141	136809619	circRNA	ATRNL1	mRNA
circRNA4930	down	-Inf	0.00188723	yes	chr9	103136892	103143129	circRNA	KIAA1324L	mRNA
circRNA1461	down	-Inf	0.00192299	yes	chr18	8475706	8477708	circRNA	WEE2	mRNA
circRNA3218	down	-Inf	0.00197714	yes	chr3	85089791	85090447	circRNA	PAPOLG	mRNA
circRNA3659	down	-Inf	0.0023123	yes	chr14	120420850	120428102	circRNA	ABCC2	mRNA
circRNA209	down	-Inf	0.00233599	yes	chr1	30979937	30980372	circRNA	ENSSSCG00000026041	mRNA
circRNA2654	down	-Inf	0.0024121	yes	chrX	17015324	17030595	circRNA	MAP3K15	mRNA
circRNA2453	down	-Inf	0.0024548	yes	chr11	13305769	13324616	circRNA	TRPC4	mRNA
circRNA3636	down	-Inf	0.00248262	yes	chr14	57763588	57781734	circRNA	RYR2	mRNA
circRNA4918	down	-Inf	0.0029387	yes	chr9	80149409	80156703	circRNA	CALCR	mRNA
circRNA1599	down	-Inf	0.00301004	yes	chr13	62890743	62901048	circRNA	CHL1	mRNA
circRNA4331	down	-Inf	0.00358846	yes	chrX	17011519	17030595	circRNA	MAP3K15	mRNA
circRNA3380	down	-Inf	0.00360393	yes	chr9	25924923	25930412	circRNA	NAALAD2	mRNA
circRNA1783	down	-Inf	0.00376645	yes	chr14	41242612	41242922	circRNA	SLC8B1	mRNA
circRNA3774	down	-Inf	0.00388634	yes	chr5	32490649	32512664	circRNA	ENSSSCG00000030998	mRNA
circRNA4147	down	-Inf	0.00391919	yes	chr12	48305310	48307821	circRNA	EFCAB5	mRNA
circRNA2213	down	-Inf	0.00449843	yes	chr18	11374388	11375497	circRNA	ATP6V0A4	mRNA
circRNA4489	down	-Inf	0.00468782	yes	chr5	20689955	20691805	circRNA	ENSSSCG00000000295	mRNA
circRNA1443	down	-Inf	0.00505025	yes	chr1	250358251	250363168	circRNA	TRPM3	mRNA
circRNA1429	down	-Inf	0.00556516	yes	chr1	179860561	179872551	circRNA	ALPK2	mRNA
circRNA4408	down	-Inf	0.00556699	yes	chr7	124771250	124771753	circRNA	ATG2B	mRNA
circRNA2655	down	-Inf	0.00666298	yes	chrX	17024701	17026638	circRNA	MAP3K15	mRNA
circRNA4333	down	-Inf	0.00686187	yes	chrX	22110698	22152884	circRNA	PCYT1B	mRNA
circRNA2805	down	-Inf	0.00721751	yes	chr2	74992230	74993603	circRNA	SHD	mRNA
circRNA1598	down	-Inf	0.00729147	yes	chr13	62890743	62897066	circRNA	CHL1	mRNA
circRNA5040	down	-Inf	0.00760289	yes	chr13	55776452	55783715	circRNA	FRMD4B	mRNA
circRNA1430	down	-Inf	0.00763051	yes	chr1	179872334	179872551	circRNA	ALPK2	mRNA
circRNA1142	down	-Inf	0.00766332	yes	chr7	21868824	21869232	circRNA	SLC17A1	mRNA
circRNA2982	up	Inf	0.00768237	yes	chr10	53459524	53461410	circRNA	ENSSSCG00000011069 (ARMC4)	mRNA
circRNA1816	down	-Inf	0.0079491	yes	chr14	120426421	120428102	circRNA	ABCC2	mRNA
circRNA657	down	-Inf	0.00814085	yes	chr2	73203999	73204192	circRNA	GTF2F1	mRNA
circRNA3828	down	-Inf	0.00838249	yes	chr3	10368670	10378037	circRNA	FKBP6	mRNA
circRNA2690	down	-Inf	0.0086325	yes	chr7	35794750	35804402	circRNA	TCP11	mRNA
circRNA969	down	-Inf	0.00864491	yes	chr1	32473137	32473331	circRNA	HBS1L	mRNA
circRNA3891	down	-Inf	0.00882772	yes	chr2	91159097	91163146	circRNA	MSH3	mRNA
circRNA1819	down	-Inf	0.00886215	yes	chr14	136748505	136775595	circRNA	ATRNL1	mRNA
circRNA3961	down	-Inf	0.00898386	yes	chr1	250313006	250363168	circRNA	TRPM3	mRNA
circRNA3144	down	-Inf	0.00919154	yes	chr5	42104599	42180342	circRNA	CAPS2	mRNA
circRNA5147	down	-Inf	0.00943618	yes	chr11	69705397	69709208	circRNA	DCT	mRNA
circRNA1828	down	-Inf	0.00961704	yes	chrX	5121745	5121972	circRNA	CH242-236E18.2	mRNA
circRNA4226	down	-Inf	0.00979751	yes	chr16	24768066	24769593	circRNA	EGFLAM	mRNA
circRNA123	down	-Inf	0.00985404	yes	chr4	122107165	122109225	circRNA	SLC25A24	mRNA
circRNA2872	down	-Inf	0.0101752	yes	chr18	26163899	26175513	circRNA	CADPS2	mRNA
circRNA4822	down	-Inf	0.0102052	yes	chr1	265247235	265258214	circRNA	MELK	mRNA
circRNA1767	down	-Inf	0.010277	yes	chr14	6999552	7006310	circRNA	PIWIL2	mRNA
ciRNA191	down	-Inf	0.0108212	yes	chr4	103701956	103702336	ciRNA	KCNN3	mRNA
circRNA1192	up	Inf	0.0112814	yes	chr6	89927175	89927815	circRNA	CEP192	mRNA
circRNA33	down	-Inf	0.0112897	yes	chr6	18059965	18063156	circRNA	CSNK2A2	mRNA
circRNA6343	up	Inf	0.0115863	yes	chr14	10701129	10701325	circRNA	CDCA2	mRNA
circRNA4600	down	-Inf	0.0120194	yes	chr3	25416327	25435511	circRNA	ENSSSCG00000007848	mRNA
circRNA5053	down	-Inf	0.0125857	yes	chr13	91298951	91311625	circRNA	PCOLCE2	mRNA
circRNA5153	down	-Inf	0.0128144	yes	chr11	72298174	72314239	circRNA	ENSSSCG00000009502	mRNA
circRNA1708	down	-Inf	0.013153	yes	chr17	5885678	5895402	circRNA	ENSSSCG00000006989	mRNA
circRNA2895	down	-Inf	0.0135425	yes	chr9	130179942	130180494	circRNA	PAPPA2	mRNA
circRNA2499	down	-Inf	0.0136788	yes	chr10	54438706	54443934	circRNA	ENSSSCG00000011061	mRNA
circRNA4517	down	-Inf	0.013823	yes	chr5	83045372	83052081	circRNA	SLC41A2	mRNA
circRNA3530	down	-Inf	0.0138446	yes	chr11	72298174	72305113	circRNA	ENSSSCG00000009502	mRNA
circRNA1144	down	-Inf	0.0140897	yes	chr7	32783248	32796907	circRNA	ENSSSCG00000001493	mRNA
circRNA1257	down	-Inf	0.014246	yes	chr4	35565212	35569895	circRNA	DPYS	mRNA
circRNA2673	down	-Inf	0.014572	yes	chrX	73879105	73880731	circRNA	CH242-123K13.1	mRNA
circRNA4541	down	-Inf	0.0146387	yes	chr4	35550528	35569895	circRNA	DPYS	mRNA
circRNA4794	down	-2.36443	0.0146857	yes	chr1	207281941	207287602	circRNA	SLC35F4	mRNA
circRNA3993	down	-Inf	0.0147867	yes	chr18	26175392	26210863	circRNA	CADPS2	mRNA
circRNA2641	down	-Inf	0.015004	yes	chr14	120420850	120476345	circRNA	ABCC2	mRNA
circRNA1460	up	Inf	0.0154213	yes	chr18	8103140	8107300	circRNA	MGAM2	mRNA
ciRNA45	down	-Inf	0.0156094	yes	chr15	87880544	87880635	ciRNA	ITGA6	mRNA
circRNA2707	down	-Inf	0.0161252	yes	chr6	6999196	7015459	circRNA	ENSSSCG00000002688	mRNA
circRNA1241	down	-Inf	0.0162041	yes	chr5	97653518	97653944	circRNA	ENSSSCG00000027898	mRNA
circRNA2902	down	-Inf	0.016236	yes	chr9	150691636	150695005	circRNA	ENSSSCG00000015632	mRNA
circRNA3777	down	-Inf	0.0163141	yes	chr5	46838253	46840107	circRNA	IPO8	mRNA
circRNA4928	down	-Inf	0.0166192	yes	chr9	102700061	102716882	circRNA	ABCB4	mRNA
circRNA4322	down	-Inf	0.0168945	yes	chr14	124375606	124376598	circRNA	NEURL1	mRNA
circRNA558	down	-Inf	0.0171595	yes	chr7	33329790	33329990	circRNA	ENSSSCG00000025172	mRNA
circRNA2247	down	-Inf	0.0172331	yes	chr9	29432610	29454192	circRNA	ENSSSCG00000014943	mRNA
circRNA1177	down	-Inf	0.0172827	yes	chr6	15082862	15083333	circRNA	ZFHX3	mRNA
circRNA2187	down	-1.34609	0.0186879	yes	chr1	211714940	211721306	circRNA	PRKCH	mRNA
circRNA3313	down	-Inf	0.018758	yes	chr1	179864221	179865984	circRNA	ALPK2	mRNA
ciRNA177	down	-Inf	0.0190663	yes	chr7	25235699	25236366	ciRNA	GABBR1	mRNA
circRNA2026	down	-Inf	0.0192281	yes	chr3	10376406	10378037	circRNA	FKBP6	mRNA
circRNA4982	down	-Inf	0.0196858	yes	chr8	75955005	75960968	circRNA	ART3	mRNA
circRNA3055	down	-Inf	0.0198798	yes	chr14	114820698	114821678	circRNA	PDE6C	mRNA
circRNA2052	down	-Inf	0.0201438	yes	chr3	90763279	90767877	circRNA	MTIF2	mRNA
circRNA2271	down	-Inf	0.0209776	yes	chr9	102712251	102716882	circRNA	ABCB4	mRNA
circRNA2760	up	Inf	0.0214505	yes	chr3	17404241	17406459	circRNA	ENSSSCG00000024091	mRNA
circRNA2126	down	-Inf	0.0215206	yes	chr2	128466735	128467915	circRNA	DMXL1	mRNA
circRNA3043	down	-Inf	0.0217729	yes	chr14	78268555	78272470	circRNA	SUPV3L1	mRNA
circRNA3150	down	-Inf	0.0219692	yes	chr5	73766947	73775618	circRNA	C12orf40	mRNA
circRNA3075	up	Inf	0.0222818	yes	chr7	16452952	16453144	circRNA	MBOAT1	mRNA
circRNA3104	down	-Inf	0.0223866	yes	chr6	45939205	45945741	circRNA	ATP1A3	mRNA
circRNA1477	down	-Inf	0.0227115	yes	chr18	26163899	26210863	circRNA	CADPS2	mRNA
circRNA4644	down	-Inf	0.0229857	yes	chr3	114091253	114091857	circRNA	BIRC6	mRNA
circRNA4398	down	-Inf	0.0233358	yes	chr7	102409867	102411389	circRNA	ENSSSCG00000002341	mRNA
ciRNA38	down	-Inf	0.0234094	yes	chr6	53232926	53233117	ciRNA	CNOT3	mRNA
circRNA1818	down	-Inf	0.0235087	yes	chr14	127943716	127955228	circRNA	SORCS1	mRNA
circRNA2002	down	-Inf	0.0238212	yes	chr4	102841856	102842072	circRNA	KIAA0907	mRNA
circRNA4850	down	-Inf	0.0238242	yes	chr18	11474332	11478400	circRNA	SVOPL	mRNA
circRNA1017	down	-Inf	0.0238827	yes	chr8	39572078	39573240	circRNA	CORIN	mRNA
circRNA2159	down	-Inf	0.0245763	yes	chr1	93383888	93384007	circRNA	DOPEY1	mRNA
circRNA3718	down	-Inf	0.0247561	yes	chr7	131067765	131084313	circRNA	TDRD9	mRNA
circRNA4749	down	-Inf	0.0249625	yes	chr1	85597181	85605758	circRNA	WASF1	mRNA
circRNA4748	down	-Inf	0.0249625	yes	chr1	85595857	85605758	circRNA	WASF1	mRNA
circRNA2651	down	-Inf	0.0254894	yes	chrX	11330668	11330854	circRNA	OFD1	mRNA
circRNA4947	down	-Inf	0.0258974	yes	chr9	130151506	130154207	circRNA	PAPPA2	mRNA
circRNA3195	down	-Inf	0.025905	yes	chr4	130781405	130820754	circRNA	ENSSSCG00000006877	mRNA
circRNA3395	down	-Inf	0.0259069	yes	chr9	89112661	89124301	circRNA	THSD7A	mRNA
circRNA3601	down	-Inf	0.0265282	yes	chr15	79419897	79428103	circRNA	ENSSSCG00000025598	mRNA
circRNA3487	down	-Inf	0.0265319	yes	chr13	193028567	193049007	circRNA	TMPRSS15	mRNA
circRNA2406	down	-Inf	0.026584	yes	chr13	209928701	209929527	circRNA	DOPEY2	mRNA
circRNA3779	down	-Inf	0.0266453	yes	chr5	47567530	47578046	circRNA	ENSSSCG00000000540	mRNA
circRNA4021	down	-Inf	0.0269618	yes	chr9	55804911	55808522	circRNA	ENSSSCG00000024299	mRNA
circRNA324	down	-Inf	0.0271264	yes	chr8	108424880	108425135	circRNA	SPATA5	mRNA
ciRNA195	down	-Inf	0.0283644	yes	chr3	40567011	40567283	ciRNA	MMP25	mRNA
circRNA4860	down	-Inf	0.0288684	yes	chr18	26163899	26232322	circRNA	CADPS2	mRNA
circRNA3405	down	-Inf	0.0290227	yes	chr9	118478236	118479892	circRNA	LAMB1	mRNA
circRNA4202	down	-Inf	0.0293226	yes	chr17	5933495	5937612	circRNA	ENSSSCG00000006989	mRNA
circRNA2633	down	-Inf	0.0296861	yes	chr14	104816906	104827320	circRNA	PCDH15	mRNA
circRNA920	down	-Inf	0.029839	yes	chr4	108045619	108045785	circRNA	ENSSSCG00000030119	mRNA
circRNA2029	down	-Inf	0.0298646	yes	chr3	16325774	16335312	circRNA	ENSSSCG00000007733	mRNA
circRNA2272	down	-Inf	0.0303529	yes	chr9	102712251	102715493	circRNA	ABCB4	mRNA
circRNA2093	down	-Inf	0.030571	yes	chr2	43691944	43711392	circRNA	LDHC	mRNA
circRNA5226	down	-Inf	0.031043	yes	chr17	67329754	67339910	circRNA	SYCP2	mRNA
circRNA3986	down	-Inf	0.0316863	yes	chr18	11374388	11377567	circRNA	ATP6V0A4	mRNA
circRNA636	down	-Inf	0.0317067	yes	chr3	84402627	84405342	circRNA	ENSSSCG00000008382	mRNA
circRNA5137	down	-Inf	0.0321462	yes	chr11	8560210	8562768	circRNA	ENSSSCG00000009337	mRNA
circRNA4783	down	-Inf	0.0328969	yes	chr1	179856004	179860824	circRNA	ALPK2	mRNA
circRNA3283	down	-Inf	0.0336986	yes	chr1	21908714	21909914	circRNA	SHPRH	mRNA
ciRNA76	down	-Inf	0.0338093	yes	chr4	139780011	139780232	ciRNA	GTF2B	mRNA
circRNA3729	down	-Inf	0.0338669	yes	chr6	42846570	42848393	circRNA	RYR1	mRNA
circRNA1344	up	Inf	0.0339646	yes	chr2	47078665	47103982	circRNA	INSC	mRNA
circRNA1805	up	Inf	0.0343763	yes	chr14	95530820	95531689	circRNA	ENSSSCG00000028341	mRNA
circRNA2938	down	-Inf	0.0354533	yes	chr13	160170344	160192858	circRNA	MYH15	mRNA
circRNA4971	down	-Inf	0.0359946	yes	chr8	39557310	39573240	circRNA	CORIN	mRNA
circRNA3624	down	-Inf	0.0363675	yes	chr14	41242411	41242922	circRNA	SLC8B1	mRNA
circRNA1601	up	Inf	0.0365122	yes	chr13	73355618	73357342	circRNA	FANCD2	mRNA
circRNA1401	down	-Inf	0.0369457	yes	chr1	82008874	82014706	circRNA	ENSSSCG00000004371	mRNA
circRNA5338	down	-Inf	0.0371501	yes	chr14	42122321	42123153	circRNA	NAA25	mRNA
circRNA1211	down	-1.59643	0.0373224	yes	chr6	152866915	152869812	circRNA	ENSSSCG00000003909	mRNA
circRNA4195	down	-Inf	0.0377133	yes	chr10	53115416	53130056	circRNA	MPP7	mRNA
circRNA3021	down	-Inf	0.038187	yes	chr15	124255248	124290974	circRNA	UNC80	mRNA
circRNA1512	down	-Inf	0.0385336	yes	chr9	102371094	102381447	circRNA	ENSSSCG00000026730	mRNA
circRNA590	down	-Inf	0.0388797	yes	chr6	145342909	145343315	circRNA	USP24	mRNA
circRNA1531	down	-Inf	0.0394567	yes	chr8	33494966	33495808	circRNA	NSUN7	mRNA
circRNA4035	down	-Inf	0.0394843	yes	chr9	103144430	103155297	circRNA	KIAA1324L	mRNA
circRNA4163	down	-Inf	0.0396218	yes	chr11	22552052	22558158	circRNA	GPALPP1	mRNA
ciRNA178	down	-Inf	0.0396726	yes	chr7	34501973	34502319	ciRNA	ITPR3	mRNA
circRNA4859	down	-Inf	0.0396751	yes	chr18	26147189	26210863	circRNA	CADPS2	mRNA
circRNA1266	down	-Inf	0.0407042	yes	chr4	104086483	104087316	circRNA	TDRD10	mRNA
circRNA4308	down	-Inf	0.0409028	yes	chr14	78234225	78243255	circRNA	VPS26A	mRNA
circRNA4481	down	-Inf	0.0409267	yes	chr6	152866915	152892298	circRNA	ENSSSCG00000003909	mRNA
circRNA3358	down	-Inf	0.0414454	yes	chr18	26147189	26175513	circRNA	CADPS2	mRNA
circRNA4148	down	-Inf	0.0416089	yes	chr12	48306070	48307821	circRNA	EFCAB5	mRNA
circRNA3778	down	-1.47915	0.0426806	yes	chr5	47553612	47567620	circRNA	ENSSSCG00000000540	mRNA
circRNA4601	down	-Inf	0.0428938	yes	chr3	25435382	25450674	circRNA	ENSSSCG00000007848	mRNA
circRNA1556	down	-Inf	0.0429529	yes	chr8	108424880	108427781	circRNA	SPATA5	mRNA
circRNA326	down	-Inf	0.0434439	yes	chr8	127051429	127054470	circRNA	SLC9B1	mRNA
circRNA365	down	-Inf	0.0434439	yes	chr13	167103118	167104720	circRNA	SENP7	mRNA
circRNA2285	down	-Inf	0.0436984	yes	chr9	132912707	132914632	circRNA	SOAT1	mRNA
circRNA2478	down	-Inf	0.0443945	yes	chr10	13459313	13461784	circRNA	TAF1A	mRNA
circRNA2168	down	-Inf	0.044919	yes	chr1	130195348	130217168	circRNA	UNC13C	mRNA
circRNA2136	down	-Inf	0.0449622	yes	chr1	10934588	10947088	circRNA	ENSSSCG00000012314	mRNA
circRNA2263	down	-Inf	0.0457121	yes	chr9	83273441	83288878	circRNA	SLC25A13	mRNA
circRNA5398	down	-Inf	0.0458263	yes	chrX	22114948	22152884	circRNA	PCYT1B	mRNA
ciRNA55	down	-Inf	0.046055	yes	chr3	62647028	62650470	ciRNA	KCMF1	mRNA
circRNA3396	down	-Inf	0.0464177	yes	chr9	99979895	99990165	circRNA	ENSSSCG00000015379	mRNA
circRNA4265	down	-Inf	0.0464177	yes	chr15	111926102	111926333	circRNA	ENSSSCG00000016073	mRNA
circRNA3994	down	-Inf	0.0464814	yes	chr18	26232183	26345863	circRNA	CADPS2	mRNA
circRNA4784	down	-Inf	0.0472738	yes	chr1	179872334	179877666	circRNA	ALPK2	mRNA
circRNA1442	down	-1.70996	0.0479235	yes	chr1	250358251	250358502	circRNA	TRPM3	mRNA
circRNA4762	down	-Inf	0.0490195	yes	chr1	132347420	132349866	circRNA	MYO5A	mRNA
circRNA445	down	-Inf	0.0491006	yes	chr17	51680010	51681422	circRNA	IFT52	mRNA
circRNA5041	down	-1.44025	0.0492562	yes	chr13	62896961	62901048	circRNA	CHL1	mRNA
circRNA2225	down	-Inf	0.0498571	yes	chr18	26314382	26345863	circRNA	CADPS2	mRNA
