# Supplementary material for: Circular RNA profiling in the oocyte and cumulus cells reveals that circARMC4 is essential for porcine oocyte maturation
Source: Aging (Albany NY). 2019 Sep 28;11(18):8015–34. doi: 10.18632/aging.102315 (PMC6781969; doi:10.18632/aging.102315)
Supplement: Supplementary Table 6 [file aging-11-102315-s005.xlsx]

## Sheet: GO analysis in cumulus cell
Supplementary Table 6. GO analysis of host genes producing DECs in cumulus cells.
GO_ID	GO_Term	GO_Function	Corrected P-value	Diff Genes #	Background Genes #	Involved Genes
GO:0007179	transforming growth factor beta receptor signaling pathway	biological_process	0.0013015	9	11	ACVR1;FUT8;PTPRK;SMAD2;SMAD4;SMAD5;TGFBR1;USP9X;ZFYVE9
GO:0032453	histone demethylase activity (H3-K4 specific))	molecular_function	0.00132486	3	6	KDM1A;KDM5B;KDM5C
GO:0043025	neuronal cell body	cellular_component	0.00150579	16	25	AGFG1;ARHGEF2;BRINP3;CAMK2D;ENSSSCG00000010525;FZD3;GDPD5;GSK3B;GTF2I;IL6ST;INPP5F;KCNN2;MYH10;MYO5A;PSEN1;PTPRK
GO:0007015	actin filament organization	biological_process	0.0016971	11	15	ACTR3;ARHGAP6;ARHGEF2;DLG1;ENSSSCG00000012474;ENSSSCG00000016426;FAT1;FHOD3;INPPL1;PCDH15;WHAMM
GO:0004672	protein kinase activity	molecular_function	0.0023004	65	146	AAK1;ACVR1;AKT3;BMPR1B;BRAF;CAMK2D;CASK;CDC42BPA;CDC42BPB;CDK13;CDK14;CSNK1A1L;CSNK2A2;ENSSSCG00000008060;ENSSSCG00000008475;ENSSSCG00000009837;ENSSSCG00000016160;ENSSSCG00000017790;ENSSSCG00000021656;ENSSSCG00000025850;ENSSSCG00000026041;ENSSSCG00000029392;GSK3B;IGF1R;JAK2;JAK3;KIT;MAP2K4;MAP3K15;MAP3K2;MAP3K20;MAP3K3;MAP3K8;MAP4K4;MAPK1;MAPK8;MASTL;MELK;MKNK1;MMD;NEK1;NEK9;NUAK1;PAN3;PDK3;PKN2;…
GO:0003730	mRNA 3'-UTR binding	molecular_function	0.00325778	8	10	CPEB1;CPEB2;CPEB3;CPEB4;PABPC1;PUM2;RC3H1;YBX3
GO:1902043	positive regulation of extrinsic apoptotic signaling pathway via death domain receptors	biological_process	0.00400417	5	5	BMPR1B;FAF1;NF1;STK3;THBS1
GO:0034648	histone demethylase activity (H3-dimethyl-K4 specific))	molecular_function	0.00400417	2	5	KDM1A;KDM5B
GO:0032154	cleavage furrow	cellular_component	0.00400417	5	5	MASTL;MYH10;MYH9;PKN2;RHOC
GO:0008083	growth factor activity	molecular_function	0.00400417	5	5	ENSSSCG00000001695;ENSSSCG00000017895;FGF12;OSGIN2;RABEP2
GO:0035556	intracellular signal transduction	biological_process	0.00447397	48	105	ADCY3;AKT3;ARFGEF2;ARHGEF12;ARHGEF2;BRAF;CAMK2D;CDC42BPA;CDC42BPB;DGKH;ENSSSCG00000004065;ENSSSCG00000008060;ENSSSCG00000009023;ENSSSCG00000013870;ENSSSCG00000029392;GSK3B;JAK2;JAK3;KIT;MAP3K20;MAP3K3;MAPK1;MASTL;MELK;MKNK1;NUAK1;PKN2;PRKCA;PRKCE;PRKD2;PRKD3;PSEN1;RASA3;RPS6KA3;RPS6KA6;SDCBP;SGK1;SMAD2;SMAD4;SRPK1;SRPK2;SS18;STK3;TGFBR1;TIAM1;TLK2;WNK1;WSB2
GO:0006468	protein phosphorylation	biological_process	0.00481786	70	163	AAK1;ACVR1;ADAM10;AKT3;BMPR1B;BRAF;CAMK2D;CASK;CDC42BPA;CDC42BPB;CDK13;CDK14;CSNK1A1L;CSNK2A2;ENSSSCG00000002260;ENSSSCG00000008060;ENSSSCG00000008475;ENSSSCG00000009837;ENSSSCG00000016160;ENSSSCG00000017790;ENSSSCG00000021656;ENSSSCG00000025606;ENSSSCG00000025850;ENSSSCG00000026041;ENSSSCG00000029392;ENSSSCG00000029792;GSK3B;IGF1R;JAK2;JAK3;KIT;MAP2K4;MAP3K15;MAP3K2;MAP3K20;MAP3K3;MAP3K8;MAP4K4;…
GO:0005856	cytoskeleton	cellular_component	0.00636466	28	56	ACTG1;ADD1;ADD2;ARHGEF2;CNN2;DSP;DST;ENSSSCG00000004199;ENSSSCG00000008456;ENSSSCG00000028707;EPB41L1;JAK2;JAK3;KRIT1;LRPPRC;MACF1;MAPK1;MVP;MYO1E;MYO7A;PAFAH1B1;PREPL;PTK2;PTPN13;PTPN21;PTPN4;VIM;WDR35
GO:0006893	Golgi to plasma membrane transport	biological_process	0.0066456	6	7	ARFGEF2;ENSSSCG00000016543;ENSSSCG00000016544;EXOC1;EXOC2;EXOC5
GO:0000462	maturation of SSU-rRNA from tricistronic rRNA transcript (SSU-rRNA, 5.8S rRNA, LSU-rRNA))	biological_process	0.0079894	4	9	DCAF13;HEATR1;UTP20;UTP6
GO:0043022	ribosome binding	molecular_function	0.00809275	10	15	CPEB1;CPEB2;CPEB3;CPEB4;EIF2S1;ENSSSCG00000009898;HSPA5;NAA15;NAA16;RICTOR
GO:0005516	calmodulin binding	molecular_function	0.00809275	10	15	CAMK2D;CNN2;IQCB1;KCNN2;MKNK1;MYO1E;MYO5A;MYO7A;PHKB;RYR2
GO:0031032	actomyosin structure organization	biological_process	0.00847454	8	11	CDC42BPA;CDC42BPB;CNN2;ENSSSCG00000004199;EPB41L1;MYH10;MYH9;TRPM7
GO:0046856	phosphatidylinositol dephosphorylation	biological_process	0.00847454	8	11	ENSSSCG00000030707;INPP5B;INPP5F;INPPL1;MTM1;MTMR1;MTMR2;OCRL
GO:0035091	phosphatidylinositol binding	molecular_function	0.00895335	18	33	ENSSSCG00000006877;ENSSSCG00000007080;ENSSSCG00000015587;ENSSSCG00000023518;MTM1;MYO1E;PLD1;SH3PXD2A;SH3PXD2B;SNX12;SNX14;SNX24;SNX27;SNX30;SNX31;SNX5;SNX9;WDR35
GO:0016301	kinase activity	molecular_function	0.00942231	44	98	ACVR1;AKT3;BMPR1B;BRAF;CAMK2D;CDC42BPA;CDC42BPB;COL4A3BP;DGKH;ENSSSCG00000003773;ENSSSCG00000003808;ENSSSCG00000010525;GALK2;GSK3B;IGF1R;JAK2;JAK3;KIT;MAP3K15;MAPK1;MAPK8;MASTL;MELK;MKNK1;NADK2;NEK1;PAPSS2;PI4KA;PKN2;PRKCA;PRKCE;PRKD2;PRKD3;PRKDC;PRKG1;PRKX;RPS6KA3;RPS6KA6;SGK1;SRPK1;TGFBR1;TRPM7;TRRAP;WEE1
GO:0003779	actin binding	molecular_function	0.0114402	26	53	CAPZB;CNN2;DAAM1;DST;ENSSSCG00000004081;ENSSSCG00000004199;ENSSSCG00000011471;ENSSSCG00000012474;ENSSSCG00000023626;ENSSSCG00000028707;EPB41L1;HOMER2;MACF1;MKL1;MYH9;MYO1E;MYO1F;MYO5A;MYO7A;NCALD;PLS3;SSH1;SYNE2;TMOD1;TRPM7;WHAMM
GO:0005911	cell-cell junction	cellular_component	0.0114977	19	36	ACTR3;AFDN;AHI1;CASK;DLG1;DSP;FAT1;ITGA5;KIT;KRIT1;MYO1E;NECTIN3;NPHP1;NPHS2;PARD3;PKD2;PTPRK;TIAM1;TRPC4
GO:0051015	actin filament binding	molecular_function	0.0117506	16	29	ACTR3;ADD1;ADD2;CAPZB;CORO2B;ENSSSCG00000004081;ENSSSCG00000008250;ENSSSCG00000008254;ENSSSCG00000009944;MYH10;MYH9;MYO1E;MYO7A;PLS3;SYNE2;TMOD1
GO:0034704	calcium channel complex	cellular_component	0.0120941	4	4	CAMK2D;MICU1;RYR2;TRPC4
GO:0030048	actin filament-based movement	biological_process	0.0120941	4	4	MYH10;MYH9;MYO5A;MYO7A
GO:0000146	microfilament motor activity	molecular_function	0.0120941	4	4	MYH10;MYH9;MYO5A;MYO7A
GO:2000766	negative regulation of cytoplasmic translation	biological_process	0.0120941	4	4	CPEB1;CPEB2;CPEB3;CPEB4
GO:0019894	kinesin binding	molecular_function	0.0120941	4	4	AP1AR;AP1G1;ENSSSCG00000006282;KTN1
GO:0050431	transforming growth factor beta binding	molecular_function	0.0120941	4	4	ACVR1;CD109;LTBP1;TGFBR1
GO:0000900	translation repressor activity, nucleic acid binding	molecular_function	0.0120941	4	4	CPEB1;CPEB2;CPEB3;CPEB4
GO:0045109	intermediate filament organization	biological_process	0.0120941	4	4	AGFG1;DSP;MTM1;VIM
GO:1990124	messenger ribonucleoprotein complex	cellular_component	0.0120941	4	4	CPEB1;CPEB2;CPEB3;CPEB4
GO:0005884	actin filament	cellular_component	0.0120941	4	4	DNAJA3;MYO5A;PLS3;TMOD1
GO:0007399	nervous system development	biological_process	0.0122747	12	20	CAMK2D;DLG1;ENSSSCG00000000152;ENSSSCG00000017986;ENSSSCG00000024527;ENSSSCG00000028256;MAP1B;NDUFV2;NRP1;PAFAH1B1;PCDH15;VPS13A
GO:0004702	signal transducer, downstream of receptor, with serine/threonine kinase activity	molecular_function	0.0122747	12	20	ACVR1;BMPR1B;ENSSSCG00000008475;ENSSSCG00000017790;MAP2K4;MAP3K2;MAP3K3;MAP3K8;MAP4K4;NEK1;STK3;TGFBR1
GO:0031175	neuron projection development	biological_process	0.0122747	12	20	CAPZB;CYFIP2;ENSSSCG00000008826;ENSSSCG00000008827;GDPD5;HERC1;LRP12;MKL1;MYH10;RAPGEF2;RB1;ZFYVE27
GO:0016477	cell migration	biological_process	0.0134561	15	27	CARMIL1;CDC42BPA;CDC42BPB;FUT8;GSK3B;ITGAV;JAK3;NRP1;PAFAH1B1;PRPF40A;PTPRK;THBS1;TIAM1;TNS3;ZRANB1
GO:0005765	lysosomal membrane	cellular_component	0.0142435	20	39	ANKFY1;ANXA2;CLCN5;DNAJC13;ENSSSCG00000010525;GDAP2;GNAI1;LAMP2;MYO7A;NPC1;PLD1;PQLC2;RAB14;RNF13;SCARB1;SPPL2A;SPPL3;UBA1;WDR41;ZFYVE26
GO:0007268	chemical synaptic transmission	biological_process	0.0152311	10	16	CACNB1;DLG1;ENSSSCG00000016543;ENSSSCG00000016544;FGF12;GLS;HTR4;MYO5A;PAFAH1B1;SDCBP
GO:0043087	regulation of GTPase activity	biological_process	0.0154021	14	25	ARHGAP6;ENSSSCG00000006901;ENSSSCG00000013409;ENSSSCG00000014088;NF1;OCRL;PAFAH1B1;PLXNC1;PRKG1;RAB3GAP1;RAB3GAP2;RASA3;RASAL2;RICTOR
GO:0004674	protein serine/threonine kinase activity	molecular_function	0.0162224	43	98	ACVR1;AKT3;BMPR1B;BRAF;CAMK2D;CDC42BPA;CDC42BPB;CDK14;CSNK1A1L;CSNK2A2;ENSSSCG00000008060;ENSSSCG00000009837;ENSSSCG00000025606;ENSSSCG00000029392;ENSSSCG00000029792;GSK3B;MAP2K4;MAP3K20;MAPK1;MAPK8;MASTL;MELK;MKNK1;NUAK1;PDK3;PKN2;PRKCA;PRKCE;PRKD2;PRKD3;PRKDC;PRKG1;PRKX;RPS6KA3;RPS6KA6;SGK1;SRPK1;SRPK2;STK3;TGFBR1;TLK2;TRPM7;WNK1
GO:0043234	protein complex	cellular_component	0.0162363	33	72	AR;ARHGEF2;EP300;FBXO7;H3F3A;HDAC2;HIRA;HTT;KDM1A;KRIT1;LTBP1;MBD2;MDM2;MYH9;NPHS2;PARP1;PEX14;PKN2;RAB3GAP1;RAB3GAP2;RIC1;RNF111;RYR2;SH3GLB1;SLC41A1;SNTB2;SNX31;STIM1;STK3;SUGT1;TOP2A;TRPC4;YWHAQ
GO:0007369	gastrulation	biological_process	0.0174007	5	6	ACVR1;HIRA;NR4A3;SMAD2;SMAD4
GO:0008135	translation factor activity, RNA binding	molecular_function	0.0174007	5	6	CPEB1;CPEB2;CPEB3;CPEB4;EIF2B3
GO:0004471	malate dehydrogenase (decarboxylating) (NAD+) activity	molecular_function	0.0174007	2	6	ME1;ME2
GO:0030036	actin cytoskeleton organization	biological_process	0.0175743	16	30	ARHGAP26;CAPZB;CORO2B;DAAM1;ENSSSCG00000009944;ENSSSCG00000011471;ENSSSCG00000012474;MAP3K2;MAP3K3;MKL1;MYH10;NF1;PAFAH1B1;SDCBP;SSH1;TMOD3
GO:0043085	positive regulation of catalytic activity	biological_process	0.0190299	7	10	BCAS3;CFLAR;GTF2F1;PRKCE;RICTOR;SH3PXD2A;SH3PXD2B
GO:0048487	beta-tubulin binding	molecular_function	0.0191085	6	8	BCAS3;CAPZB;HTT;LRPPRC;PEX14;TTLL7
GO:0031648	protein destabilization	biological_process	0.0191085	6	8	BTRC;CCDC88C;CTSH;MDM2;PRKDC;SENP2
GO:0048854	brain morphogenesis	biological_process	0.0191085	6	8	AFDN;AKT3;ENSSSCG00000008250;FOXO3;PAFAH1B1;SLC6A4
GO:0034644	cellular response to UV	biological_process	0.0191085	6	8	CREBBP;EIF2S1;EP300;INO80;KDM1A;PTPRK
GO:0005768	endosome	cellular_component	0.0198031	20	40	ANKFY1;ANXA2;AP1AR;BIRC6;CLCN5;DGKH;ENSSSCG00000004857;ENSSSCG00000006877;ENSSSCG00000010525;ENSSSCG00000017895;NPC1;PLD1;SLC9A6;SNX12;SNX27;SNX30;SNX5;TFRC;UVRAG;VPS26A
GO:0043231	intracellular membrane-bounded organelle	cellular_component	0.0198496	52	123	ABCA7;AGFG1;AMBRA1;ANKFY1;AP1G1;BIRC6;BRAF;CADPS2;CEP131;CHD2;CROT;CTSH;CTSS;DENND4C;DENND6A;DNAJA3;DNAJC13;EPS15;FYCO1;GOLGA4;GRB14;GTF2F1;IGF1R;IL1R1;ITM2B;MTMR2;NCOA6;NDFIP2;NUP214;NUP98;OSBPL9;P4HA2;PARG;PPARG;PQLC2;PTPRK;RAB14;RABEP2;RNF13;RUFY1;SCARB1;SDCBP;SERGEF;SLC9A6;SPPL2A;SPPL3;SPTAN1;TAF1A;TBC1D14;TNPO3;ZFYVE9;ZRANB1
GO:0023014	signal transduction by protein phosphorylation	biological_process	0.0201324	12	21	ACVR1;BMPR1B;ENSSSCG00000008475;ENSSSCG00000017790;KIT;MAP3K2;MAP3K3;MAP3K8;MAP4K4;NEK1;STK3;TGFBR1
GO:0009986	cell surface	cellular_component	0.0202318	24	50	ABCA7;ABCC2;ADAM10;ADAMTS7;ANTXR2;ANXA2;CD109;CD44;CORIN;ERP44;HSPA5;IL1R1;ITGA2;ITGA5;ITGAV;KCNN2;KIT;MPZL1;PTPRK;SCARB1;TFRC;THBS1;TMEM206;TRPC4
GO:0003774	motor activity	molecular_function	0.0202649	15	28	ENSSSCG00000001510;ENSSSCG00000007080;ENSSSCG00000013870;KIF11;KIF15;KIF1B;KIF1C;KIF22;KIF5B;MYH10;MYH9;MYO1E;MYO1F;MYO5A;MYO7A
GO:0016740	transferase activity	molecular_function	0.022799	77	192	ACAT1;ACVR1;AKT3;ALG6;BMPR1B;BRAF;CAMK2D;CDC42BPA;CDC42BPB;CDKAL1;CEPT1;CHST15;CREBBP;CROT;DGKH;ENSSSCG00000001493;ENSSSCG00000003773;ENSSSCG00000003808;ENSSSCG00000006508;ENSSSCG00000009885;ENSSSCG00000010236;ENSSSCG00000011041;ENSSSCG00000022479;ENSSSCG00000022734;ENSSSCG00000025315;ENSSSCG00000025703;EP300;FUT8;G2E3;GALNT11;GALNT2;HERC1;HERC3;HUWE1;IGF1R;JAK2;JAK3;KIT;MAP3K15;MAPK1;MAPK8;MASTL…
GO:0016791	phosphatase activity	molecular_function	0.023381	14	26	CDC14A;ENSSSCG00000017935;ENSSSCG00000028140;MINPP1;MTM1;MTMR1;MTMR14;MTMR2;PTPN13;PTPN21;PTPN4;PTPN9;PTPRK;SSH1
GO:0045202	synapse	cellular_component	0.0253783	16	31	CASK;CPEB1;CPEB2;CPEB3;CPEB4;CYFIP2;DLG1;ENSSSCG00000009241;ENSSSCG00000016543;ENSSSCG00000016544;GABRA4;ITGA5;MYO7A;SDK2;SLC9A6;SNTB2
GO:0016567	protein ubiquitination	biological_process	0.0262549	36	82	ANKIB1;BIRC6;BTRC;CUL1;DCAF1;DCAF17;ENSSSCG00000001922;ENSSSCG00000002003;ENSSSCG00000005575;ENSSSCG00000008787;ENSSSCG00000009885;ENSSSCG00000010236;ENSSSCG00000015853;ENSSSCG00000015939;ENSSSCG00000015940;ENSSSCG00000021149;ENSSSCG00000022479;ENSSSCG00000022486;FBXO7;FBXW8;G2E3;GAN;HERC1;HERC3;HUWE1;KLHL3;MDM2;MIB1;RNF111;RNF14;RNF4;TRPC4AP;UBA1;UBE3B;WSB2;WWP1
GO:0016310	phosphorylation	biological_process	0.0302209	44	104	ACVR1;AKT3;ALDH18A1;BMPR1B;BRAF;CAMK2D;CDC42BPA;CDC42BPB;COL4A3BP;DGKH;ENSSSCG00000003773;ENSSSCG00000003808;ENSSSCG00000003828;GSK3B;IGF1R;JAK2;JAK3;KIT;MAP3K15;MAPK1;MAPK8;MASTL;MELK;MKNK1;N4BP2;NADK2;PANK2;PAPSS2;PI4KA;PKN2;PRKCA;PRKCE;PRKD2;PRKD3;PRKDC;PRKG1;PRKX;RPS6KA3;RPS6KA6;SGK1;SRPK1;TGFBR1;TRRAP;WEE1
GO:0005769	early endosome	cellular_component	0.0306387	17	34	ANKFY1;ANXA2;ENSSSCG00000023518;INPP5F;MAPK1;MYO5A;NRP1;OCRL;RPS6KC1;SLC9A6;SNX12;SNX27;SNX31;TRAK1;UVRAG;VPS26A;WLS
GO:0005667	transcription factor complex	cellular_component	0.0310921	19	39	CREM;ENSSSCG00000008171;ENSSSCG00000008909;ENSSSCG00000013397;EP300;KDM1A;MED27;NAA15;NCOA6;NR4A3;PARP1;PBX3;PRKDC;RB1;RBL1;SMAD2;SMAD4;SMAD5;YAP1
GO:0032092	positive regulation of protein binding	biological_process	0.033507	8	13	ADD1;ADD2;EP300;GSK3B;KRIT1;SPPL3;STK3;TIAM1
GO:0002039	p53 binding	molecular_function	0.033507	8	13	CREBBP;EP300;GSK3B;HTT;KDM1A;MDM2;NUAK1;TP53BP2
GO:0043547	positive regulation of GTPase activity	biological_process	0.033573	46	110	ARAP2;ARFGAP3;ARFGEF2;ARHGAP26;ARHGAP6;ARHGEF12;ARHGEF2;BCAS3;DENND2A;DENND4C;DENND6A;DOCK11;DOCK5;DOCK9;EIF2B3;ENSSSCG00000003818;ENSSSCG00000004065;ENSSSCG00000006901;ENSSSCG00000009465;ENSSSCG00000009551;ENSSSCG00000013533;ENSSSCG00000013870;ENSSSCG00000016237;ENSSSCG00000017895;ENSSSCG00000021656;ENSSSCG00000023884;ENSSSCG00000025602;ENSSSCG00000029792;FGD6;GBF1;GDI2;GSK3B;NF1;OCRL;RAB3GAP1;R…
GO:0016323	basolateral plasma membrane	cellular_component	0.0340693	14	27	ABCC1;ANK2;ANK3;ANXA2;CASK;CD44;DLG1;DSP;LRCH4;MARVELD2;SLC29A1;SLC41A1;TFRC;TRPC4
GO:0007165	signal transduction	biological_process	0.0360926	51	124	ADCY3;ADGRL2;AFDN;AKT3;ANK2;ANK3;ANKDD1B;ARAP2;ARHGAP12;ARHGAP26;ARHGAP6;BRAF;COL4A3BP;ENSSSCG00000004065;ENSSSCG00000014088;ENSSSCG00000014894;ENSSSCG00000016953;ENSSSCG00000026524;GNAI1;GRB10;GRB14;HTR4;IL1R1;IL6ST;INPP4B;INPP5B;LRCH3;LRCH4;LRRC1;MPZL1;NDFIP2;NF1;OCRL;PDE8A;PKN2;PLPPR2;PLXNC1;PPARG;PPP2R5A;PPP2R5C;PRKG1;PTPRK;RAPGEF2;RASA3;RASAL2;RGL1;RNF14;RPS6KC1;SNX27;STOML3;TIAM1
GO:0030017	sarcomere	cellular_component	0.0365049	3	3	FHOD3;RYR2;TMOD1
GO:0034720	histone H3-K4 demethylation	biological_process	0.0365049	3	3	KDM1A;KDM5B;KDM5C
GO:0086091	regulation of heart rate by cardiac conduction	biological_process	0.0365049	3	3	ANK2;CACNA2D1;DSP
GO:0001540	beta-amyloid binding	molecular_function	0.0365049	3	3	APBB2;ITM2B;LDLRAD3
GO:0033619	membrane protein proteolysis	biological_process	0.0365049	3	3	CTSH;SPPL2A;SPPL3
GO:0017196	N-terminal peptidyl-methionine acetylation	biological_process	0.0365049	3	3	NAA15;NAA16;NAA25
GO:0071539	protein localization to centrosome	biological_process	0.0365049	3	3	C2CD3;CEP131;KIAA0753
GO:0018149	peptide cross-linking	biological_process	0.0365049	3	3	ABCA7;DSP;THBS1
GO:0030016	myofibril	cellular_component	0.0365049	3	3	ACTG1;SYNE2;TMOD1
GO:0098911	regulation of ventricular cardiac muscle cell action potential	biological_process	0.0365049	3	3	DLG1;DSP;RYR2
GO:0005025	transforming growth factor beta receptor activity, type I	molecular_function	0.0365049	3	3	ACVR1;BMPR1B;TGFBR1
GO:0002027	regulation of heart rate	biological_process	0.0365049	3	3	ANK2;MDM2;RYR2
GO:0060384	innervation	biological_process	0.0365049	3	3	CHD7;LRIG1;SERPINE2
GO:0060712	spongiotrophoblast layer development	biological_process	0.0365049	3	3	BIRC6;FBXW8;SENP2
GO:0030511	positive regulation of transforming growth factor beta receptor signaling pathway	biological_process	0.0365049	3	3	RNF111;SMAD4;THBS1
GO:0071260	cellular response to mechanical stimulus	biological_process	0.0365049	3	3	BNIP3;MAP2K4;MAP3K2
GO:0051924	regulation of calcium ion transport	biological_process	0.0365049	3	3	ANK2;CACNA2D1;STIM1
GO:0051016	barbed-end actin filament capping	biological_process	0.0365049	3	3	ADD1;ADD2;CAPZB
GO:0030660	Golgi-associated vesicle membrane	cellular_component	0.0365049	3	3	ITM2B;SPPL2A;SPPL3
GO:0032886	regulation of microtubule-based process	biological_process	0.0365049	3	3	GSK3B;MACF1;MEMO1
GO:0005112	Notch binding	molecular_function	0.0365049	3	3	AAK1;GALNT11;KCTD10
GO:0019838	growth factor binding	molecular_function	0.0365049	3	3	ACVR1;IL6ST;NRP1
GO:0008290	F-actin capping protein complex	cellular_component	0.0365049	3	3	ADD1;ADD2;CAPZB
GO:0071556	integral component of lumenal side of endoplasmic reticulum membrane	cellular_component	0.0365049	3	3	PKD2;SPPL2A;SPPL3
GO:0007183	SMAD protein complex assembly	biological_process	0.0365049	3	3	SMAD2;SMAD4;ZFYVE9
GO:0071458	integral component of cytoplasmic side of endoplasmic reticulum membrane	cellular_component	0.0365049	3	3	PKD2;SPPL2A;SPPL3
GO:0010742	macrophage derived foam cell differentiation	biological_process	0.0365049	3	3	EP300;PPARG;SOAT1
GO:0045862	positive regulation of proteolysis	biological_process	0.0365049	3	3	BTRC;CYFIP2;HDAC2
GO:0016407	acetyltransferase activity	molecular_function	0.0365049	3	3	CREBBP;EP300;NAA15
GO:1900625	positive regulation of monocyte aggregation	biological_process	0.0365049	3	3	CD44;NR4A3;SHAS2
GO:0060711	labyrinthine layer development	biological_process	0.0365049	3	3	BIRC6;SENP2;VASH2
GO:0034647	histone demethylase activity (H3-trimethyl-K4 specific))	molecular_function	0.0365049	1	3	KDM5B
GO:0032924	activin receptor signaling pathway	biological_process	0.0365049	3	3	ACVR1;SMAD2;TGFBR1
GO:0008092	cytoskeletal protein binding	molecular_function	0.0375016	7	11	ANXA2;DST;ENSSSCG00000004199;ENSSSCG00000028707;EPB41L1;PKD2;PTPN4
GO:1905515	non-motile cilium assembly	NA	0.0375016	7	11	C2CD3;CC2D2A;CEP126;IFT52;PCDH15;POC1A;TBC1D32
GO:0060348	bone development	biological_process	0.0375016	7	11	ENSSSCG00000018049;MMP16;PAPSS2;PLS3;POC1A;SH3PXD2B;SLC38A10
GO:0001750	photoreceptor outer segment	cellular_component	0.0375016	7	11	IQCB1;MAP1B;MYO5A;MYO7A;OCRL;PCDH15;PTPRK
GO:0005925	focal adhesion	cellular_component	0.0376351	30	68	ACTG1;ACTR3;ADAM10;ADD1;ARHGEF2;CASK;CD44;EFNB2;ENAH;FAT1;GDI2;HSP90B1;HSPA5;ITGA2;ITGA5;ITGAV;JAK2;MAPK1;MPZL1;MYH9;NRP1;NUP214;PABPC1;PI4KA;RPS10;SNTB2;SYNE2;TNS3;VIM;YWHAQ
GO:0030374	ligand-dependent nuclear receptor transcription coactivator activity	molecular_function	0.0413468	6	9	KDM1A;NCOA1;NCOA3;NCOA6;PPARG;SS18
GO:0010595	positive regulation of endothelial cell migration	biological_process	0.0413468	6	9	BCAS3;CCBE1;ENSSSCG00000001695;PRKCA;PRKD2;THBS1
GO:0001938	positive regulation of endothelial cell proliferation	biological_process	0.0413468	6	9	ENSSSCG00000001695;NF1;PRKCA;PRKD2;TGFBR1;VASH2
GO:0007368	determination of left/right symmetry	biological_process	0.0413468	6	9	ACVR1;CC2D2A;ENSSSCG00000015379;IFT52;PKD2;TBC1D32
GO:0005871	kinesin complex	cellular_component	0.0416976	10	18	ENSSSCG00000001510;ENSSSCG00000006282;ENSSSCG00000007080;ENSSSCG00000011634;KIF11;KIF15;KIF1B;KIF1C;KIF22;KIF5B
GO:0030032	lamellipodium assembly	biological_process	0.0442885	5	7	CAPZB;CARMIL1;KIT;NUP85;WHAMM
GO:0030507	spectrin binding	molecular_function	0.0442885	5	7	ADD1;ADD2;ANK2;ANK3;MYO7A
GO:0007051	spindle organization	biological_process	0.0442885	5	7	ENSSSCG00000013533;ENSSSCG00000023884;KIF11;KIZ;SPAG5
GO:0033344	cholesterol efflux	biological_process	0.0442885	5	7	ABCA7;CH242-113D13.1;NPC1;SCARB1;SOAT1
GO:0042472	inner ear morphogenesis	biological_process	0.0442885	5	7	CHD7;FZD3;INSIG1;MYO7A;NR4A3
GO:0045773	positive regulation of axon extension	biological_process	0.0442885	5	7	GOLGA4;GSK3B;MACF1;MAP1B;ZFYVE27
GO:0016235	aggresome	cellular_component	0.0442885	5	7	EPS15;SERGEF;SYNE2;URB2;XRN2
GO:0019005	SCF ubiquitin ligase complex	cellular_component	0.0442885	5	7	ABTB2;BTRC;CUL1;FBXW4;FBXW8
GO:0042641	actomyosin	cellular_component	0.0442885	5	7	CDC42BPA;CDC42BPB;MYH10;MYH9;MYO5A
GO:0030136	clathrin-coated vesicle	cellular_component	0.0442885	5	7	AP1G1;ENSSSCG00000014913;EPS15;OCRL;SNX9
GO:0031080	nuclear pore outer ring	cellular_component	0.0442885	5	7	AHCTF1;ENSSSCG00000000486;ENSSSCG00000000860;NUP85;NUP98
GO:0000381	regulation of alternative mRNA splicing, via spliceosome	biological_process	0.0444537	4	5	ENSSSCG00000000152;ENSSSCG00000028256;ENSSSCG00000028663;PTBP1
GO:0015485	cholesterol binding	molecular_function	0.0444537	4	5	NPC1;OSBPL10;SCAP;SOAT1
GO:0051642	centrosome localization	biological_process	0.0444537	4	5	KIF5B;NIN;SUN2;SYNE2
GO:0070577	lysine-acetylated histone binding	molecular_function	0.0444537	4	5	BAZ1B;BRD2;PSME4;ZMYND8
GO:0042578	phosphoric ester hydrolase activity	molecular_function	0.0444537	4	5	ENSSSCG00000004405;ENSSSCG00000005722;ENSSSCG00000027176;INPP5F
GO:0006509	membrane protein ectodomain proteolysis	biological_process	0.0444537	4	5	ADAM10;MYH9;PSEN1;SPPL2A
GO:0004190	aspartic-type endopeptidase activity	molecular_function	0.0444537	4	5	DDI2;PSEN1;SPPL2A;SPPL3
GO:0005545	1-phosphatidylinositol binding	molecular_function	0.0444537	4	5	ENSSSCG00000014913;SNX9;WDFY3;ZFYVE9
GO:0060395	SMAD protein signal transduction	biological_process	0.0444537	4	5	HEXA;SMAD2;SMAD4;VIM
GO:0043518	negative regulation of DNA damage response, signal transduction by p53 class mediator	biological_process	0.0444537	4	5	CD44;KDM1A;MDM2;SENP2
GO:0006461	protein complex assembly	biological_process	0.0444537	4	5	ADD2;MDM2;MDM4;PEX14
GO:0005977	glycogen metabolic process	biological_process	0.0444537	4	5	AGL;GSK3B;IL6ST;PHKB
GO:0000910	cytokinesis	biological_process	0.0444537	4	5	AHCTF1;MYH9;RHOC;ZFYVE26
GO:0006261	DNA-dependent DNA replication	biological_process	0.0444537	4	5	BAZ1A;MCMBP;POLN;RFC2
GO:0097352	autophagosome maturation	biological_process	0.0444537	4	5	LAMP2;LIX1;SNX14;STX17
GO:0051639	actin filament network formation	biological_process	0.0444537	4	5	CARMIL1;ENSSSCG00000025598;FHOD3;PLS3
GO:0004438	phosphatidylinositol-3-phosphatase activity	molecular_function	0.0444537	4	5	MTM1;MTMR1;MTMR14;MTMR2
GO:0005057	signal transducer activity, downstream of receptor	molecular_function	0.0444537	4	5	BRAF;ENSSSCG00000004065;TGFBR1;TIAM1
GO:0050852	T cell receptor signaling pathway	biological_process	0.0444537	4	5	BRAF;MAPK1;PRKD2;SPPL3
GO:0004725	protein tyrosine phosphatase activity	molecular_function	0.0459812	12	23	CDC14A;ENSSSCG00000005194;MTM1;MTMR1;MTMR14;MTMR2;PTPN13;PTPN21;PTPN4;PTPN9;PTPRK;SSH1
GO:0035335	peptidyl-tyrosine dephosphorylation	biological_process	0.0459812	12	23	CDC14A;ENSSSCG00000005194;MTM1;MTMR1;MTMR14;MTMR2;PTPN13;PTPN21;PTPN4;PTPN9;PTPRK;SSH1
GO:0007018	microtubule-based movement	biological_process	0.0459812	12	23	DNAH10;DYNC1I2;ENSSSCG00000001510;ENSSSCG00000007080;ENSSSCG00000015379;KIF11;KIF15;KIF1B;KIF1C;KIF22;KIF5B;KTN1
GO:0009897	external side of plasma membrane	cellular_component	0.048261	9	16	ANTXR2;GPC4;IL6ST;ITGA2;ITGA5;ITGAV;KIT;TFRC;THBS1
GO:0031012	extracellular matrix	cellular_component	0.0537467	19	41	ACTG1;ADAMTS7;COL14A1;DSP;EFTUD2;ENSSSCG00000002341;FBN2;HADHA;HSP90B1;HSPA5;LTBP1;MMP16;MYH9;PRKDC;RPS10;SERPINE2;THBS1;VCAN;VIM
GO:0005770	late endosome	cellular_component	0.0557179	13	26	ENSSSCG00000023518;FYCO1;HTT;LAMP2;MAPK1;MTM1;MYO5A;OSBPL1A;RAPGEF2;SLC9A6;SNX14;SPPL2A;UVRAG
GO:0005938	cell cortex	cellular_component	0.0558785	8	14	ENSSSCG00000008826;ENSSSCG00000008827;MELK;MKLN1;MYH10;MYH9;NUMA1;PAFAH1B1
GO:2001237	negative regulation of extrinsic apoptotic signaling pathway	biological_process	0.0558785	8	14	ACVR1;AR;BIRC6;CFLAR;HTT;ITGAV;NRP1;YAP1
GO:0006887	exocytosis	biological_process	0.0558785	8	14	ENSSSCG00000016543;ENSSSCG00000016544;EXOC1;EXOC5;MYH10;MYO5A;STX17;VMP1
GO:0005085	guanyl-nucleotide exchange factor activity	molecular_function	0.0560339	15	31	ARFGEF2;ARHGEF12;DOCK11;DOCK5;DOCK9;EIF2B3;ENSSSCG00000003818;ENSSSCG00000004065;ENSSSCG00000016237;ENSSSCG00000025602;ENSSSCG00000029792;RAPGEF2;RGL1;SOS2;TIAM1
GO:0019902	phosphatase binding	molecular_function	0.0646939	7	12	CHCHD3;DLG1;MAPK1;SMAD2;SPRED1;TRPC4AP;WNK1
GO:0043005	neuron projection	cellular_component	0.0649695	12	24	BRAF;CAMK2D;CPEB1;CPEB2;CPEB3;CPEB4;ENSSSCG00000010525;KIF5B;MAPK8;MYH10;SLC6A4;VIM
GO:0005886	plasma membrane	cellular_component	0.0683176	127	344	ABCA7;ABCC1;ACTG1;ADCY3;ADD1;AFDN;ANK3;ANXA2;AR;ARID2;ATP10D;BMPR1B;BRAF;CAMK2D;CARMIL1;CD44;CDK14;CHD1L;CLCN5;CORIN;DAAM1;DENND4C;DLG1;DOCK5;DSP;EFNB2;ENAH;ENSSSCG00000004199;ENSSSCG00000004857;ENSSSCG00000006735;ENSSSCG00000007100;ENSSSCG00000010525;ENSSSCG00000011772;ENSSSCG00000021203;ENSSSCG00000022486;EPB41L1;EPS15;EXOC1;FAT1;FZD3;GABRA4;GNAI1;GPC4;GPI;GRB14;GSK3B;HSP90B1;HSPA5;IGF1R;INO80;…
GO:0000902	cell morphogenesis	biological_process	0.0731293	9	17	ADD1;ARHGEF2;COL4A3BP;CSNK1A1L;ENSSSCG00000008826;ENSSSCG00000008827;SS18;SSH1;YAP1
GO:0016311	dephosphorylation	biological_process	0.0741454	15	32	ATP1A1;CDC14A;ENSSSCG00000017935;ENSSSCG00000028140;MINPP1;MTM1;MTMR1;MTMR14;MTMR2;PTPN13;PTPN21;PTPN4;PTPN9;PTPRK;SSH1
GO:0010951	negative regulation of endopeptidase activity	biological_process	0.0748222	6	10	APLP2;BIRC6;CD109;CRIM1;ENSSSCG00000002341;SERPINE2
GO:0031252	cell leading edge	cellular_component	0.0748222	6	10	BCAS3;CARMIL1;GBF1;MYH9;PAFAH1B1;VIM
GO:0072659	protein localization to plasma membrane	biological_process	0.0748222	6	10	ANK2;ANK3;DENND4C;DLG1;MYO5A;RAPGEF2
GO:0000123	histone acetyltransferase complex	cellular_component	0.0748222	6	10	CREBBP;EP300;JADE3;KANSL1;KANSL1L;TRRAP
GO:0050731	positive regulation of peptidyl-tyrosine phosphorylation	biological_process	0.0748222	6	10	ARHGEF2;CD44;ENSSSCG00000001695;ITGA5;NRP1;RICTOR
GO:0004842	ubiquitin-protein transferase activity	molecular_function	0.0757503	29	69	ANKIB1;BIRC6;BTRC;ENSSSCG00000001922;ENSSSCG00000002003;ENSSSCG00000005575;ENSSSCG00000008787;ENSSSCG00000009885;ENSSSCG00000010236;ENSSSCG00000015853;ENSSSCG00000021149;ENSSSCG00000022479;ENSSSCG00000022486;FBXW8;G2E3;GAN;HERC1;HERC3;HUWE1;KLHL3;LTN1;MDM2;MIB1;RNF13;RNF14;UBE2H;UBE2K;UBE3B;WWP1
GO:0006915	apoptotic process	biological_process	0.0758202	13	27	BIRC6;BNIP3;CFLAR;CTSH;CUL1;CYFIP2;DNAJA3;ENSSSCG00000000884;EP300;MELK;OPA1;RB1;RPS6KA3
GO:0051726	regulation of cell cycle	biological_process	0.0759246	11	22	BTRC;CABLES1;CCNI;CDK13;CDK14;CSNK2A2;MASTL;NUP214;RB1;RBL1;UBA3
GO:0003777	microtubule motor activity	molecular_function	0.0759246	11	22	DNAH10;ENSSSCG00000001510;ENSSSCG00000007080;ENSSSCG00000011634;ENSSSCG00000015379;KIF11;KIF15;KIF1B;KIF1C;KIF22;KIF5B
GO:0008017	microtubule binding	molecular_function	0.0811291	21	48	ARHGEF2;CCDC88C;CCSER2;DST;EML4;ENSSSCG00000001510;ENSSSCG00000007080;KIF11;KIF15;KIF1B;KIF1C;KIF22;KIF5B;KRIT1;MACF1;MAP1B;OPA1;PAFAH1B1;PEX14;WHAMM;ZNF207
GO:0060271	cilium assembly	biological_process	0.0827452	16	35	ACTR3;AHI1;ARL6;C2CD3;CC2D2A;CDC14A;CEP126;CEP131;ENSSSCG00000011553;ENSSSCG00000016667;ENSSSCG00000024754;IFT52;IQCB1;NEK1;OCRL;WDR35
GO:0010494	cytoplasmic stress granule	cellular_component	0.0858177	8	15	EIF2S1;LARP4;LARP4B;MBNL1;PABPC1;PUM2;RBPMS;RC3H1
GO:0030335	positive regulation of cell migration	biological_process	0.0860638	14	30	ACVR1;ADAM10;CARMIL1;CTSH;HSPA5;IGF1R;ITGAV;PRKCA;SDCBP;SHAS2;SUN2;SYNE2;THBS1;TIAM1
GO:0007417	central nervous system development	biological_process	0.0862551	5	8	AHI1;CHD7;GABRA4;STK3;VCAN
GO:0030904	retromer complex	cellular_component	0.0862551	5	8	ANKFY1;DENND4C;SNX27;SNX5;VPS26A
GO:0008180	COP9 signalosome	cellular_component	0.0862551	5	8	DCAF1;ENSSSCG00000009241;HSPA5;MYH9;TMOD1
GO:0006869	lipid transport	biological_process	0.0862551	5	8	ABCA7;ENSSSCG00000016715;OSBPL10;OSBPL1A;OSBPL9
GO:0045787	positive regulation of cell cycle	biological_process	0.0862551	5	8	ANKRD17;GDPD5;MDM2;NR4A3;SLC6A4
GO:0051017	actin filament bundle assembly	biological_process	0.0862551	5	8	ADD1;ADD2;ENSSSCG00000021111;PCDH15;PLS3
GO:0007507	heart development	biological_process	0.0927626	20	46	ACADM;ACVR1;CC2D2A;ENSSSCG00000012001;ENSSSCG00000015379;EP300;KDM6A;MAPK1;MDM2;MIB1;MYH10;NF1;NRP1;PKD2;PRKDC;SENP2;SH3PXD2B;SMAD2;TBC1D32;TGFBR1
GO:0007156	homophilic cell adhesion via plasma membrane adhesion molecules	biological_process	0.0985596	4	6	FAT1;NECTIN3;PCDH15;SDK2
GO:0005882	intermediate filament	cellular_component	0.0985596	4	6	DSP;MYO5A;TLK2;VIM
GO:0000132	establishment of mitotic spindle orientation	biological_process	0.0985596	4	6	ARHGEF2;HTT;NUMA1;PAFAH1B1
GO:0035904	aorta development	biological_process	0.0985596	4	6	CHD7;LTBP1;MYH10;PKD2
GO:0031589	cell-substrate adhesion	biological_process	0.0985596	4	6	ITGA2;ITGA5;ITGAV;PRKX
GO:0014704	intercalated disc	cellular_component	0.0985596	4	6	CAMK2D;CAPZB;DSP;TMEM65
GO:0060041	retina development in camera-type eye	biological_process	0.0985596	4	6	BMPR1B;CHD7;MYH10;TBC1D32
GO:0030838	positive regulation of actin filament polymerization	biological_process	0.0985596	4	6	CARMIL1;DLG1;PRKCE;RICTOR
GO:0030705	cytoskeleton-dependent intracellular transport	biological_process	0.0985596	4	6	CCDC88C;KIF1B;KIF1C;KIF5B
GO:0031902	late endosome membrane	cellular_component	0.0985596	4	6	ANXA2;LAMP2;RNF13;SPPL2A
GO:0018345	protein palmitoylation	biological_process	0.0985596	4	6	HHAT;ZDHHC20;ZDHHC3;ZDHHC7
GO:0006605	protein targeting	biological_process	0.0985596	4	6	LAMP2;PAN3;YWHAQ;ZDHHC3
GO:0032420	stereocilium	cellular_component	0.0985596	4	6	MYO7A;PAFAH1B1;PCDH15;ZSWIM6
GO:0050681	androgen receptor binding	molecular_function	0.0985596	4	6	EP300;KDM1A;KDM3A;RNF14
GO:0030863	cortical cytoskeleton	cellular_component	0.0985596	4	6	CAPZB;MYH9;TMOD1;TRPC4
GO:0031901	early endosome membrane	cellular_component	0.0985596	4	6	DNAJC13;SLC9A6;SNX5;ZFYVE9
GO:0008023	transcription elongation factor complex	cellular_component	0.0985596	4	6	ELL2;ERCC6;MLLT1;MLLT3
GO:0031235	intrinsic component of the cytoplasmic side of the plasma membrane	cellular_component	0.0985596	4	6	NF1;NPHS2;RASA3;RASAL2
GO:0016050	vesicle organization	biological_process	0.0985596	4	6	ENSSSCG00000006877;SNX12;SNX30;SNX5
GO:0070273	phosphatidylinositol-4-phosphate binding	molecular_function	0.0985596	4	6	ARFIP1;COL4A3BP;SH3PXD2B;SNX24
GO:0004867	serine-type endopeptidase inhibitor activity	molecular_function	0.0985596	4	6	APLP2;CRIM1;ENSSSCG00000002341;SERPINE2
GO:0016459	myosin complex	cellular_component	0.101079	7	13	ENSSSCG00000013870;MYH10;MYH9;MYO1E;MYO1F;MYO5A;MYO7A
GO:0051536	iron-sulfur cluster binding	molecular_function	0.101079	7	13	ACO1;AOX1;CDKAL1;ENSSSCG00000001493;ENSSSCG00000007733;NDUFV2;PPAT
GO:0031594	neuromuscular junction	cellular_component	0.101079	7	13	CAMK2D;DLG1;DNAJA3;FCHSD2;MYH10;MYH9;SERPINE2
GO:0072686	mitotic spindle	cellular_component	0.101079	7	13	CDC14A;KIF22;NUMA1;PKD2;SPAG5;TADA2A;YEATS2
GO:0055037	recycling endosome	cellular_component	0.103373	11	23	AP1G1;ARFGEF2;DENND6A;ENSSSCG00000011772;FCHSD2;INPP5F;MYO5A;RAB14;SLC9A6;TBC1D14;TFRC
GO:0001764	neuron migration	biological_process	0.104561	9	18	APBB2;FZD3;LRP12;MKL1;MYH10;NRP1;PAFAH1B1;PRKG1;USP9X
GO:0047485	protein N-terminus binding	molecular_function	0.104561	9	18	CSNK2A2;ERCC6;EXOC2;EXOC5;NCOA1;NCOA3;PARP1;PEX14;YWHAQ
GO:0048844	artery morphogenesis	biological_process	0.109737	3	4	CHD7;NF1;NRP1
GO:0034314	Arp2/3 complex-mediated actin nucleation	biological_process	0.109737	3	4	ACTR3;ENSSSCG00000016426;WHAMM
GO:0070509	calcium ion import	biological_process	0.109737	3	4	CASK;MICU1;TRPC4
GO:0032584	growth cone membrane	cellular_component	0.109737	3	4	ENSSSCG00000016543;ENSSSCG00000016544;ZFYVE27
GO:0004473	malate dehydrogenase (decarboxylating (NADP+) activity	molecular_function	0.109737	2	4	ME1;ME2
GO:0001516	prostaglandin biosynthetic process	biological_process	0.109737	3	4	ENSSSCG00000025277;ENSSSCG00000028982;PTGES3
GO:0050699	WW domain binding	molecular_function	0.109737	3	4	ENAH;NDFIP2;RAPGEF2
GO:0047496	vesicle transport along microtubule	biological_process	0.109737	3	4	HTT;KIF5B;PAFAH1B1
GO:0060716	labyrinthine layer blood vessel development	biological_process	0.109737	3	4	FBXW8;MAPK1;VASH2
GO:0043666	regulation of phosphoprotein phosphatase activity	biological_process	0.109737	3	4	HSP90B1;HTT;PPP6R3
GO:0005158	insulin receptor binding	molecular_function	0.109737	3	4	ENSSSCG00000004473;GRB10;IGF1R
GO:0000002	mitochondrial genome maintenance	biological_process	0.109737	3	4	AKT3;OPA1;SLC25A36
GO:0097192	extrinsic apoptotic signaling pathway in absence of ligand	biological_process	0.109737	3	4	FOXO3;GSK3B;ITGAV
GO:0032433	filopodium tip	cellular_component	0.109737	3	4	FZD3;MYO5A;UBE2K
GO:0090527	actin filament reorganization	biological_process	0.109737	3	4	ENSSSCG00000008826;ENSSSCG00000008827;WHAMM
GO:0008047	enzyme activator activity	molecular_function	0.109737	3	4	CFLAR;PRKCE;RICTOR
GO:0007100	mitotic centrosome separation	biological_process	0.109737	3	4	ENSSSCG00000017986;ENSSSCG00000024527;KIF11
GO:1990126	retrograde transport, endosome to plasma membrane	biological_process	0.109737	3	4	SNX27;SNX31;VPS26A
GO:0043536	positive regulation of blood vessel endothelial cell migration	biological_process	0.109737	3	4	PRKCA;PRKD2;THBS1
GO:0010842	retina layer formation	biological_process	0.109737	3	4	AHI1;ARL6;SDK2
GO:0033209	tumor necrosis factor-mediated signaling pathway	biological_process	0.109737	3	4	ARHGEF2;FOXO3;JAK2
GO:0045765	regulation of angiogenesis	biological_process	0.109737	3	4	ITGA5;NF1;VASH2
GO:0010952	positive regulation of peptidase activity	biological_process	0.109737	3	4	CTSH;PCOLCE2;PSME4
GO:0061512	protein localization to cilium	biological_process	0.109737	3	4	ARL6;TBC1D32;WDR35
GO:0097110	scaffold protein binding	molecular_function	0.109737	3	4	DSP;MDM2;VIM
GO:1903599	positive regulation of mitophagy	biological_process	0.109737	3	4	AMBRA1;FBXO7;HTT
GO:0048041	focal adhesion assembly	biological_process	0.109737	3	4	ARHGAP6;PTPRK;WHAMM
GO:0031146	SCF-dependent proteasomal ubiquitin-dependent protein catabolic process	biological_process	0.109737	3	4	BTRC;CUL1;FBXW4
GO:0000288	nuclear-transcribed mRNA catabolic process, deadenylation-dependent decay	biological_process	0.109737	3	4	CNOT1;PAN3;RC3H1
GO:0042169	SH2 domain binding	molecular_function	0.109737	3	4	INPPL1;JAK2;SH3PXD2B
GO:0070371	ERK1 and ERK2 cascade	biological_process	0.109737	3	4	CTSH;ITGAV;MAPK1
GO:0050767	regulation of neurogenesis	biological_process	0.109737	3	4	CHD7;KDM1A;YAP1
GO:0032526	response to retinoic acid	biological_process	0.109737	3	4	CTSH;GDAP2;PPARG
GO:0009925	basal plasma membrane	cellular_component	0.109737	3	4	ANK3;PKD2;SLC23A1
GO:0030330	DNA damage response, signal transduction by p53 class mediator	biological_process	0.109737	3	4	ATRX;FOXO3;MDM4
GO:0002102	podosome	cellular_component	0.109737	3	4	ARHGEF2;SH3PXD2A;SH3PXD2B
GO:0052629	phosphatidylinositol-3,5-bisphosphate 3-phosphatase activity	molecular_function	0.109737	3	4	MTM1;MTMR1;MTMR2
GO:0005978	glycogen biosynthetic process	biological_process	0.109737	3	4	ACADM;AGL;PTGES3
GO:0030010	establishment of cell polarity	biological_process	0.109737	3	4	MELK;RICTOR;WEE1
GO:0008250	oligosaccharyltransferase complex	cellular_component	0.109737	3	4	MAGT1;STT3B;TUSC3
GO:0003785	actin monomer binding	molecular_function	0.109737	3	4	ENSSSCG00000025598;MKL1;PRKCE
GO:0031663	lipopolysaccharide-mediated signaling pathway	biological_process	0.109737	3	4	MAPK1;PRKCE;SCARB1
GO:0036302	atrioventricular canal development	biological_process	0.109737	3	4	CHD7;SHAS2;SMAD4
GO:0005887	integral component of plasma membrane	cellular_component	0.109813	30	74	ABCC1;ABCC2;ACVR1;CLCN5;ENSSSCG00000007100;ENSSSCG00000014894;ENSSSCG00000026527;HTR4;LRP12;MMP16;MPZL1;NECTIN3;NPC1;NPHS2;P2RX6;PCDH15;PKD2;PLPPR2;PSEN1;SAMD8;SCARB1;SHAS2;SLC29A1;SLC38A1;SLC39A14;SLC4A7;SLC6A4;TFRC;TRPC1;TRPC4
GO:2000574	regulation of microtubule motor activity	biological_process	0.110115	2	2	ENSSSCG00000017986;ENSSSCG00000024527
GO:0043535	regulation of blood vessel endothelial cell migration	biological_process	0.110115	2	2	NF1;PRCP
GO:0010757	negative regulation of plasminogen activation	biological_process	0.110115	2	2	SERPINE2;THBS1
GO:0090043	regulation of tubulin deacetylation	biological_process	0.110115	2	2	EP300;TADA2A
GO:0061441	renal artery morphogenesis	biological_process	0.110115	2	2	NRP1;PKD2
GO:0061158	3'-UTR-mediated mRNA destabilization	biological_process	0.110115	2	2	CPEB3;RC3H1
GO:0030676	Rac guanyl-nucleotide exchange factor activity	molecular_function	0.110115	2	2	ARHGEF2;TIAM1
GO:0032444	activin responsive factor complex	cellular_component	0.110115	2	2	SMAD2;SMAD4
GO:1902414	protein localization to cell junction	biological_process	0.110115	2	2	AFDN;NECTIN3
GO:0097513	myosin II filament	cellular_component	0.110115	2	2	MYH10;MYH9
GO:0048752	semicircular canal morphogenesis	biological_process	0.110115	2	2	CHD7;NR4A3
GO:0060765	regulation of androgen receptor signaling pathway	biological_process	0.110115	2	2	EP300;RNF14
GO:0042491	auditory receptor cell differentiation	biological_process	0.110115	2	2	MYO7A;PCDH15
GO:0015866	ADP transport	biological_process	0.110115	2	2	SLC25A17;SLC25A24
GO:0070410	co-SMAD binding	molecular_function	0.110115	2	2	SMAD2;USP9X
GO:0035694	mitochondrial protein catabolic process	biological_process	0.110115	2	2	BNIP3;YME1L1
GO:1901797	negative regulation of signal transduction by p53 class mediator	biological_process	0.110115	2	2	MDM2;SENP2
GO:0034315	regulation of Arp2/3 complex-mediated actin nucleation	biological_process	0.110115	2	2	AP1AR;ARFIP1
GO:0043227	membrane-bounded organelle	cellular_component	0.110115	2	2	GSK3B;KIF5B
GO:0043534	blood vessel endothelial cell migration	biological_process	0.110115	2	2	MYH9;SCARB1
GO:0070307	lens fiber cell development	biological_process	0.110115	2	2	TMOD1;VIM
GO:0010571	positive regulation of nuclear cell cycle DNA replication	biological_process	0.110115	2	2	ATRX;INO80
GO:0030914	STAGA complex	cellular_component	0.110115	2	2	SAP130;TRRAP
GO:0043550	regulation of lipid kinase activity	biological_process	0.110115	2	2	RB1;RBL1
GO:0098907	regulation of SA node cell action potential	biological_process	0.110115	2	2	ANK2;RYR2
GO:0042500	aspartic endopeptidase activity, intramembrane cleaving	molecular_function	0.110115	2	2	SPPL2A;SPPL3
GO:0048745	smooth muscle tissue development	biological_process	0.110115	2	2	DLG1;NF1
GO:0072675	osteoclast fusion	biological_process	0.110115	2	2	CD109;SH3PXD2A
GO:0035148	tube formation	biological_process	0.110115	2	2	BCAS3;ENSSSCG00000001695
GO:0038027	apolipoprotein A-I-mediated signaling pathway	biological_process	0.110115	2	2	ABCA7;ITGAV
GO:0061162	establishment of monopolar cell polarity	biological_process	0.110115	2	2	GBF1;MAP1B
GO:0043268	positive regulation of potassium ion transport	biological_process	0.110115	2	2	DLG1;KIF5B
GO:0048608	reproductive structure development	biological_process	0.110115	2	2	AR;DLG1
GO:0043622	cortical microtubule organization	biological_process	0.110115	2	2	DLG1;PAFAH1B1
GO:0002087	regulation of respiratory gaseous exchange by neurological system process	biological_process	0.110115	2	2	GLS;PBX3
GO:1990966	ATP generation from poly-ADP-D-ribose	NA	0.110115	2	2	PARG;PARP1
GO:0035234	ectopic germ cell programmed cell death	biological_process	0.110115	2	2	KIT;PRKDC
GO:0015867	ATP transport	biological_process	0.110115	2	2	SLC25A17;SLC25A24
GO:0071380	cellular response to prostaglandin E stimulus	biological_process	0.110115	2	2	ACACA;PRKCE
GO:0051694	pointed-end actin filament capping	biological_process	0.110115	2	2	TMOD1;TMOD3
GO:0090201	negative regulation of release of cytochrome c from mitochondria	biological_process	0.110115	2	2	ENSSSCG00000011779;OPA1
GO:0060546	negative regulation of necroptotic process	biological_process	0.110115	2	2	ENSSSCG00000002003;YBX3
GO:0017154	semaphorin receptor activity	molecular_function	0.110115	2	2	NRP1;PLXNC1
GO:0070838	divalent metal ion transport	biological_process	0.110115	2	2	SLC41A1;SLC41A2
GO:0003016	respiratory system process	biological_process	0.110115	2	2	CCBE1;KDM6A
GO:0015937	coenzyme A biosynthetic process	biological_process	0.110115	2	2	ACAT1;PANK2
GO:0030239	myofibril assembly	biological_process	0.110115	2	2	MYH10;TMOD1
GO:0001945	lymph vessel development	biological_process	0.110115	2	2	CCBE1;EFNB2
GO:0048661	positive regulation of smooth muscle cell proliferation	biological_process	0.110115	2	2	NR4A3;THBS1
GO:0031587	positive regulation of inositol 1,4,5-trisphosphate-sensitive calcium-release channel activity	biological_process	0.110115	2	2	HTT;PKD2
GO:0050772	positive regulation of axonogenesis	biological_process	0.110115	2	2	BRAF;PLXNC1
GO:0046604	positive regulation of mitotic centrosome separation	biological_process	0.110115	2	2	ENSSSCG00000013533;ENSSSCG00000023884
GO:0051279	regulation of release of sequestered calcium ion into cytosol	biological_process	0.110115	2	2	ANK2;PRKCE
GO:0048711	positive regulation of astrocyte differentiation	biological_process	0.110115	2	2	IL6ST;SERPINE2
GO:0043069	negative regulation of programmed cell death	biological_process	0.110115	2	2	DNAJA3;KIT
GO:0005523	tropomyosin binding	molecular_function	0.110115	2	2	TMOD1;TMOD3
GO:0007007	inner mitochondrial membrane organization	biological_process	0.110115	2	2	CHCHD3;OPA1
GO:0042985	negative regulation of amyloid precursor protein biosynthetic process	biological_process	0.110115	2	2	ABCA7;ITM2B
GO:0003989	acetyl-CoA carboxylase activity	molecular_function	0.110115	2	2	ACACA;ACACB
GO:2000369	regulation of clathrin-dependent endocytosis	biological_process	0.110115	2	2	AAK1;SMAP1
GO:0019205	nucleobase-containing compound kinase activity	molecular_function	0.110115	2	2	ENSSSCG00000003773;ENSSSCG00000003808
GO:0048511	rhythmic process	biological_process	0.110115	2	2	PPARG;TOP2A
GO:0003910	DNA ligase (ATP) activity	molecular_function	0.110115	1	2	PARP1
GO:0030686	90S preribosome	cellular_component	0.110115	2	2	HEATR1;UTP20
GO:0035867	alphav-beta3 integrin-IGF-1-IGF1R complex	cellular_component	0.110115	2	2	IGF1R;ITGAV
GO:0031579	membrane raft organization	biological_process	0.110115	2	2	DLG1;NPC1
GO:0018076	N-terminal peptidyl-lysine acetylation	biological_process	0.110115	2	2	CREBBP;EP300
GO:0035771	interleukin-4-mediated signaling pathway	biological_process	0.110115	2	2	ENSSSCG00000026524;JAK3
GO:0086005	ventricular cardiac muscle cell action potential	biological_process	0.110115	2	2	ANK2;RYR2
GO:0006654	phosphatidic acid biosynthetic process	biological_process	0.110115	2	2	PLD1;SH3GLB1
GO:0048729	tissue morphogenesis	biological_process	0.110115	2	2	DLG1;SMAD4
GO:0016176	superoxide-generating NADPH oxidase activator activity	molecular_function	0.110115	2	2	SH3PXD2A;SH3PXD2B
GO:0006903	vesicle targeting	biological_process	0.110115	2	2	ENSSSCG00000016543;ENSSSCG00000016544
GO:0051791	medium-chain fatty acid metabolic process	biological_process	0.110115	2	2	ACADM;CROT
GO:0032933	SREBP signaling pathway	biological_process	0.110115	2	2	INSIG1;SCAP
GO:0009330	DNA topoisomerase complex (ATP-hydrolyzing)	cellular_component	0.110115	1	2	TOP2A
GO:0098910	regulation of atrial cardiac muscle cell action potential	biological_process	0.110115	2	2	ANK2;RYR2
GO:0045861	negative regulation of proteolysis	biological_process	0.110115	2	2	NR1H3;SERPINE2
GO:0016266	O-glycan processing	biological_process	0.110115	2	2	ENSSSCG00000015341;GALNT2
GO:0007274	neuromuscular synaptic transmission	biological_process	0.110115	2	2	FCHSD2;KIF1B
GO:0010881	regulation of cardiac muscle contraction by regulation of the release of sequestered calcium ion	biological_process	0.110115	2	2	ANK2;RYR2
GO:0015858	nucleoside transport	biological_process	0.110115	2	2	SLC25A17;SLC29A1
GO:0031290	retinal ganglion cell axon guidance	biological_process	0.110115	2	2	BMPR1B;NRP1
GO:0010763	positive regulation of fibroblast migration	biological_process	0.110115	2	2	PRKCE;THBS1
GO:1903373	positive regulation of endoplasmic reticulum tubular network organization	biological_process	0.110115	2	2	RAB3GAP1;RAB3GAP2
GO:0001656	metanephros development	biological_process	0.110115	2	2	CTSH;NF1
GO:0010977	negative regulation of neuron projection development	biological_process	0.110115	2	2	GSK3B;VIM
GO:0051895	negative regulation of focal adhesion assembly	biological_process	0.110115	2	2	ARHGAP6;BCAS3
GO:0071800	podosome assembly	biological_process	0.110115	2	2	SH3PXD2A;SH3PXD2B
GO:0007512	adult heart development	biological_process	0.110115	2	2	CHD7;MYH10
GO:0097359	UDP-glucosylation	biological_process	0.110115	2	2	ENSSSCG00000009502;ENSSSCG00000015857
GO:0005347	ATP transmembrane transporter activity	molecular_function	0.110115	2	2	SLC25A17;SLC25A24
GO:0032230	positive regulation of synaptic transmission, GABAergic	biological_process	0.110115	2	2	KIF5B;PRKCE
GO:0043568	positive regulation of insulin-like growth factor receptor signaling pathway	biological_process	0.110115	2	2	AR;IGFBP4
GO:0008024	cyclin/CDK positive transcription elongation factor complex	cellular_component	0.110115	2	2	CDK13;RB1
GO:0055117	regulation of cardiac muscle contraction	biological_process	0.110115	2	2	ANK2;RYR2
GO:0016460	myosin II complex	cellular_component	0.110115	2	2	MYH10;MYH9
GO:0003181	atrioventricular valve morphogenesis	biological_process	0.110115	2	2	ACVR1;MDM2
GO:0000812	Swr1 complex	cellular_component	0.110115	2	2	EP400;TRRAP
GO:0017015	regulation of transforming growth factor beta receptor signaling pathway	biological_process	0.110115	2	2	SMAD2;SMAD4
GO:0090331	negative regulation of platelet aggregation	biological_process	0.110115	2	2	PRKG1;SERPINE2
GO:0005851	eukaryotic translation initiation factor 2B complex	cellular_component	0.110115	2	2	EIF2B3;EIF2S1
GO:0010606	positive regulation of cytoplasmic mRNA processing body assembly	biological_process	0.110115	2	2	CNOT1;PAN3
GO:1990244	histone kinase activity(H2A-T120 specific)	molecular_function	0.110115	1	2	DCAF1
GO:0034098	VCP-NPL4-UFD1 AAA ATPase complex	cellular_component	0.110115	2	2	FAF1;FAF2
GO:0046621	negative regulation of organ growth	biological_process	0.110115	2	2	SLC6A4;STK3
GO:0071318	cellular response to ATP	biological_process	0.110115	2	2	HSP90B1;SSH1
GO:0035461	vitamin transmembrane transport	biological_process	0.110115	2	2	SCARB1;SLC23A1
GO:0032593	insulin-responsive compartment	cellular_component	0.110115	2	2	DENND4C;MYO5A
GO:0051537	2 iron, 2 sulfur cluster binding	molecular_function	0.110115	2	2	AOX1;NDUFV2
GO:0044255	cellular lipid metabolic process	biological_process	0.110115	2	2	INPPL1;NR1H3
GO:0031301	integral component of organelle membrane	cellular_component	0.110115	2	2	ITM2B;PQLC2
GO:0015217	ADP transmembrane transporter activity	molecular_function	0.110115	2	2	SLC25A17;SLC25A24
GO:0097038	perinuclear endoplasmic reticulum	cellular_component	0.110115	2	2	ADAM10;GDPD5
GO:0032525	somite rostral/caudal axis specification	biological_process	0.110115	2	2	KDM6A;SMAD4
GO:0097111	endoplasmic reticulum-Golgi intermediate compartment organization	biological_process	0.110115	2	2	GBF1;STX17
GO:0002155	regulation of thyroid hormone mediated signaling pathway	biological_process	0.110115	2	2	NCOA1;PRCP
GO:0030546	receptor activator activity	molecular_function	0.110115	2	2	ANXA2;PRKCE
GO:0060307	regulation of ventricular cardiac muscle cell membrane repolarization	biological_process	0.110115	2	2	ANK2;CACNA2D1
GO:0043032	positive regulation of macrophage activation	biological_process	0.110115	2	2	IL4R;THBS1
GO:0071141	SMAD protein complex	cellular_component	0.110115	2	2	SMAD2;SMAD4
GO:0042511	positive regulation of tyrosine phosphorylation of Stat1 protein	biological_process	0.110115	2	2	IL6ST;KIT
GO:0010614	negative regulation of cardiac muscle hypertrophy	biological_process	0.110115	2	2	GSK3B;SMAD4
GO:0031527	filopodium membrane	cellular_component	0.110115	2	2	ITGAV;SYNE2
GO:0072509	divalent inorganic cation transmembrane transporter activity	molecular_function	0.110115	2	2	SLC41A1;SLC41A2
GO:0021817	nucleokinesis involved in cell motility in cerebral cortex radial glia guided migration	biological_process	0.110115	2	2	SUN2;SYNE2
GO:0051098	regulation of binding	biological_process	0.110115	2	2	SMAD2;SMAD4
GO:0006473	protein acetylation	biological_process	0.110115	2	2	CREBBP;EP300
GO:0033119	negative regulation of RNA splicing	biological_process	0.110115	2	2	PTBP1;PTBP3
GO:0004430	1-phosphatidylinositol 4-kinase activity	molecular_function	0.110115	2	2	ENSSSCG00000010525;PI4KA
GO:0035584	calcium-mediated signaling using intracellular calcium source	biological_process	0.110115	2	2	HOMER2;RYR2
GO:0009437	carnitine metabolic process	biological_process	0.110115	2	2	ACADM;CROT
GO:0048009	insulin-like growth factor receptor signaling pathway	biological_process	0.110115	2	2	GRB10;IGF1R
GO:0030898	actin-dependent ATPase activity	molecular_function	0.110115	2	2	MYH10;MYH9
GO:0003220	left ventricular cardiac muscle tissue morphogenesis	biological_process	0.110115	2	2	RYR2;SMAD4
GO:0033116	endoplasmic reticulum-Golgi intermediate compartment membrane	cellular_component	0.110115	2	2	SPPL3;WHAMM
GO:0036035	osteoclast development	biological_process	0.110115	2	2	ANXA2;PAFAH1B1
GO:1903660	negative regulation of complement-dependent cytotoxicity	biological_process	0.110115	2	2	ENSSSCG00000026524;JAK3
GO:0051224	negative regulation of protein transport	biological_process	0.110115	2	2	NDFIP2;SNX12
GO:0038033	positive regulation of endothelial cell chemotaxis by VEGF-activated vascular endothelial growth factor receptor signaling pathway	biological_process	0.110115	2	2	ENSSSCG00000001695;PRKD2
GO:0008656	cysteine-type endopeptidase activator activity involved in apoptotic process	molecular_function	0.110115	2	2	CTSH;ENSSSCG00000000884
GO:0071782	endoplasmic reticulum tubular network	cellular_component	0.110115	2	2	RAB3GAP1;ZFYVE27
GO:0005885	Arp2/3 protein complex	cellular_component	0.110115	2	2	ACTR3;ENSSSCG00000016426
GO:0046965	retinoid X receptor binding	molecular_function	0.110115	2	2	NR1H3;PPARG
GO:0003283	atrial septum development	biological_process	0.110115	2	2	ANK2;MDM2
GO:0052745	inositol phosphate phosphatase activity	molecular_function	0.110115	2	2	MINPP1;OCRL
GO:1900745	positive regulation of p38MAPK cascade	biological_process	0.110115	2	2	ARHGEF2;MAP3K3
GO:0003170	heart valve development	biological_process	0.110115	2	2	ENSSSCG00000014343;MDM2
GO:0061045	negative regulation of wound healing	biological_process	0.110115	2	2	CASK;CD109
GO:1902031	regulation of NADP metabolic process	biological_process	0.110115	2	2	ME1;ME2
GO:0090160	Golgi to lysosome transport	biological_process	0.110115	2	2	ANKFY1;AP1G1
GO:0045786	negative regulation of cell cycle	biological_process	0.110115	2	2	PTPRK;RB1
GO:0005521	lamin binding	molecular_function	0.110115	2	2	NARF;SUN2
GO:0031293	membrane protein intracellular domain proteolysis	biological_process	0.110115	2	2	MBTPS2;SPPL2A
GO:0038127	ERBB signaling pathway	biological_process	0.110115	2	2	MAPK1;MVP
GO:0097284	hepatocyte apoptotic process	biological_process	0.110115	2	2	RB1;STK3
GO:0050684	regulation of mRNA processing	biological_process	0.110115	2	2	SRPK1;SRPK2
GO:0060039	pericardium development	biological_process	0.110115	2	2	SETD2;SMAD2
GO:0007089	traversing start control point of mitotic cell cycle	biological_process	0.110115	2	2	MDM2;MTBP
GO:0031022	nuclear migration along microfilament	biological_process	0.110115	2	2	SUN2;SYNE2
GO:0004439	phosphatidylinositol-4,5-bisphosphate 5-phosphatase activity	molecular_function	0.110115	2	2	INPP5B;OCRL
GO:0006084	acetyl-CoA metabolic process	biological_process	0.110115	2	2	ACACA;ACACB
GO:0002318	myeloid progenitor cell differentiation	biological_process	0.110115	2	2	BRAF;KIT
GO:0035401	histone kinase activity (H3-Y41 specific)	molecular_function	0.110115	1	2	JAK2
GO:0061099	negative regulation of protein tyrosine kinase activity	biological_process	0.110115	2	2	IBTK;MVP
GO:0071526	semaphorin-plexin signaling pathway	biological_process	0.110115	2	2	NRP1;PLXNC1
GO:0031981	nuclear lumen	cellular_component	0.110115	2	2	NARF;SYNE2
GO:0003980	UDP-glucose:glycoprotein glucosyltransferase activity	molecular_function	0.110115	2	2	ENSSSCG00000009502;ENSSSCG00000015857
GO:0044354	macropinosome	cellular_component	0.110115	2	2	ANKFY1;CARMIL1
GO:0043426	MRF binding	molecular_function	0.110115	2	2	CREBBP;KDM1A
GO:0034452	dynactin binding	molecular_function	0.110115	2	2	HTT;SNX5
GO:0097051	establishment of protein localization to endoplasmic reticulum membrane	biological_process	0.110115	2	2	RAB3GAP1;RAB3GAP2
GO:0006897	endocytosis	biological_process	0.110794	14	31	ENSSSCG00000004857;ENSSSCG00000006877;ENSSSCG00000014913;ENSSSCG00000017895;INPPL1;LRP8;MIB1;MYO1E;NPC1;RABEP2;SNX12;SNX30;SNX5;SNX9
GO:0061630	ubiquitin protein ligase activity	molecular_function	0.111316	23	55	ANKIB1;BTRC;CUL1;CUL2;ENSSSCG00000001922;ENSSSCG00000008176;ENSSSCG00000015939;ENSSSCG00000015940;ENSSSCG00000016234;ENSSSCG00000021149;ENSSSCG00000022486;ENSSSCG00000025632;LONRF3;LTN1;MDM2;RNF111;RNF13;RNF14;RNF4;UBE2H;UBE2K;UBE2W;WWP1
GO:0042995	cell projection	cellular_component	0.119607	6	11	AGFG1;COQ6;GTF2I;MAGI1;VIM;WDR35
GO:0001085	RNA polymerase II transcription factor binding	molecular_function	0.119607	6	11	AR;CREBBP;EP300;GSK3B;KDM1A;SMAD4
GO:0030018	Z disc	cellular_component	0.119607	6	11	CAPZB;KCNN2;PPP2R5A;PSEN1;RYR2;SYNE2
GO:0031532	actin cytoskeleton reorganization	biological_process	0.119607	6	11	CDC42BPA;KIT;MKLN1;MYH9;NPHS2;RICTOR
GO:0051287	NAD binding	molecular_function	0.119607	6	11	AOX1;ME1;ME2;NDUFS2;PARP1;UGDH
GO:0030054	cell junction	cellular_component	0.120762	15	34	ABCA7;AFDN;DCAF13;DLG1;DSP;ENAH;ENSSSCG00000009241;FAT1;GABRA4;GTF2F1;MAGI1;MARVELD2;P2RX6;PARD3;PTPRK
GO:0006606	protein import into nucleus	biological_process	0.121146	10	21	ENSSSCG00000000486;ENSSSCG00000013533;ENSSSCG00000023884;IPO7;KPNA1;NUP188;NUP214;NUP85;NUP98;TNPO3
GO:0042147	retrograde transport, endosome to Golgi	biological_process	0.123374	8	16	ANKFY1;DENND2A;ENSSSCG00000014828;ENSSSCG00000027509;GBF1;RIC1;SNX5;VPS26A
GO:0070374	positive regulation of ERK1 and ERK2 cascade	biological_process	0.123374	8	16	ABCA7;ARHGEF2;BRAF;CD44;NRP1;PDE8A;PRKD2;RAPGEF2
GO:0014069	postsynaptic density	cellular_component	0.123374	8	16	ADAM10;ADD2;ARHGEF2;BNIP3;CPEB4;DLG1;GSK3B;MAP1B
GO:0001701	in utero embryonic development	biological_process	0.135859	20	48	ACVR1;ADAM10;ADD1;AR;C2CD3;CHD7;COL4A3BP;GPI;INPP5B;KDM1A;KDM6A;MIB1;MYH10;MYH9;MYO1E;OCRL;SMAD2;SMAD4;TANC2;YBX3
GO:0032587	ruffle membrane	cellular_component	0.142391	5	9	ABCA7;ARHGEF2;ITGA5;ITGAV;MACF1
GO:0043086	negative regulation of catalytic activity	biological_process	0.142391	5	9	ACACB;ANXA2;CRIM1;ENSSSCG00000023626;FAF2
GO:0045070	positive regulation of viral genome replication	biological_process	0.142391	5	9	PABPC1;PKN2;SRPK1;SRPK2;TOP2A
GO:0032454	histone demethylase activity(H3-K9 specific))	molecular_function	0.142391	3	9	JMJD1C;KDM1A;KDM3A
GO:0016573	histone acetylation	biological_process	0.142391	5	9	CREBBP;EP300;NCOA3;TADA2A;TRRAP
GO:0006397	mRNA processing	biological_process	0.142391	5	9	ENSSSCG00000000152;PAN3;PTBP1;PTBP3;RBM39
GO:0007338	single fertilization	biological_process	0.142391	5	9	ADCY3;AR;H3F3A;KDM5B;SMAD4
GO:0000145	exocyst	cellular_component	0.142391	5	9	ENSSSCG00000016543;ENSSSCG00000016544;EXOC1;EXOC2;EXOC5
GO:0004402	histone acetyltransferase activity	molecular_function	0.142391	5	9	CREBBP;EP300;NCOA3;SAP130;TADA2A
GO:0019899	enzyme binding	molecular_function	0.143151	25	62	ANK2;AR;HACD4;HDAC2;HSPA5;IQCB1;KDM1A;LAMP2;MDM2;MDM4;MSH3;NCOA1;NCOA6;PARP1;PGR;PPARG;PRKCA;PRKCE;PRKDC;RB1;RFC2;RYR2;SNX12;TNKS2;TOP2A
GO:0005096	GTPase activator activity	molecular_function	0.143151	25	62	ARAP2;ARFGAP3;ARHGAP26;ARHGAP6;ENSSSCG00000006901;ENSSSCG00000009465;ENSSSCG00000013533;ENSSSCG00000013870;ENSSSCG00000017895;ENSSSCG00000023884;GDI2;NF1;OCRL;RAB3GAP1;RABEP2;RAPGEF2;RASA3;RASAL2;SIPA1L2;SMAP1;TBC1D14;TBC1D22A;TBC1D8;TBC1D8B;USP6NL
GO:0005524	ATP binding	molecular_function	0.144462	145	407	AAK1;ABCA7;ABCC1;ABCC2;ABCD3;ACACA;ACACB;ACTG1;ACTR3;ACVR1;AKT3;ATAD1;ATP10D;ATP1A1;ATRX;BMPR1B;BRAF;CAMK2D;CASK;CDC42BPA;CDC42BPB;CDK13;CDK14;CH242-113D13.1;CHD1L;CHD2;CHD7;CLCN5;CSNK1A1L;CSNK2A2;CTPS2;DDX21;DGKH;DHX15;DHX40;DNAH10;DNAJA3;ENSSSCG00000000884;ENSSSCG00000001510;ENSSSCG00000003773;ENSSSCG00000003808;ENSSSCG00000004857;ENSSSCG00000007080;ENSSSCG00000008060;ENSSSCG00000008068;ENSSSCG…
GO:0019900	kinase binding	molecular_function	0.146279	7	14	DLG1;HTT;MOB1B;PDE8A;PPP2R5A;RB1;TIAM1
GO:0001666	response to hypoxia	biological_process	0.146279	7	14	ENSSSCG00000001695;EP300;HSP90B1;NF1;RYR2;SCAP;SMAD4
GO:0000165	MAPK cascade	biological_process	0.146279	7	14	BRAF;ENSSSCG00000026041;MAP2K4;MAP3K15;MAPK1;MAPK8;NF1
GO:0005635	nuclear envelope	cellular_component	0.149002	12	27	BNIP3;ENSSSCG00000004081;FAF1;NPC1;NUP98;PAFAH1B1;PARP1;PARP11;SUN2;SYNE2;TNKS2;WDFY3
GO:0008283	cell proliferation	biological_process	0.149275	15	35	COL4A3BP;CUL1;FBXW8;H3F3A;KDM1A;MDM4;MELK;MKI67;MYH10;PRKDC;PTGES3;SMAD4;XRCC5;YAP1;YME1L1
GO:0008284	positive regulation of cell proliferation	biological_process	0.154119	19	46	ADAM10;AR;BIRC6;CEP131;CTSH;DLG1;EFNB2;HDAC2;IL6ST;ITGAV;KIT;RPRD1B;SDCBP;SHAS2;SRPK2;THBS1;TIAM1;TNS3;YAP1
GO:0000978	RNA polymerase II core promoter proximal region sequence-specific DNA binding	molecular_function	0.158443	16	38	AEBP2;AR;CHD7;ETV6;HDAC2;KDM6A;MBD2;NFYC;NR1H3;NR2C1;NR4A3;PGR;PRDM5;SMAD2;SMAD4;ZNF395
GO:0031982	vesicle	cellular_component	0.158831	10	22	ANXA2;ARHGEF2;CASK;DYNC1I2;ENSSSCG00000025940;GDI2;KIF5B;MYO5A;NPC1;VPS26A
GO:0007155	cell adhesion	biological_process	0.166898	17	41	AFDN;CD44;EFNB2;ENSSSCG00000008250;ENSSSCG00000008254;FAT1;ITGA2;ITGA5;ITGAV;MYH9;NECTIN3;PCDH15;PRKX;PTPRK;SHAS2;THBS1;VCAN
GO:0007264	small GTPase mediated signal transduction	biological_process	0.166898	17	41	ARL6;DNAJA3;DOCK11;DOCK5;DOCK9;ENSSSCG00000003818;ENSSSCG00000014828;ENSSSCG00000016237;ENSSSCG00000024859;ENSSSCG00000025602;GDI2;RAB14;RAPGEF2;RGL1;RHOC;SOS2;YWHAQ
GO:0008013	beta-catenin binding	molecular_function	0.168037	8	17	AR;BTRC;EP300;FOXO3;GSK3B;PSEN1;PTPRK;TRPC4
GO:0005198	structural molecule activity	molecular_function	0.168037	8	17	ADD1;ADD2;DSP;ENSSSCG00000004199;ENSSSCG00000008254;EPB41L1;SNTB2;VIM
GO:0007628	adult walking behavior	biological_process	0.170921	4	7	CHD7;HEXA;NPC1;PCDH15
GO:0004709	MAP kinase kinase kinase activity	molecular_function	0.170921	4	7	BRAF;ENSSSCG00000026041;MAP3K15;MAP3K20
GO:0051059	NF-kappaB binding	molecular_function	0.170921	4	7	FAF1;GSK3B;HDAC2;TP53BP2
GO:0016409	palmitoyltransferase activity	molecular_function	0.170921	4	7	HHAT;ZDHHC20;ZDHHC3;ZDHHC7
GO:0022604	regulation of cell morphogenesis	biological_process	0.170921	4	7	AGO4;LARP4;QRICH1;ZRANB1
GO:0000792	heterochromatin	cellular_component	0.170921	4	7	ATRX;MBD2;SMARCAD1;UBA1
GO:0042383	sarcolemma	cellular_component	0.170921	4	7	ANK3;ANXA2;CAMK2D;KCNN2
GO:0003950	NAD+ ADP-ribosyltransferase activity	molecular_function	0.170921	4	7	ENSSSCG00000016502;PARP1;PARP11;TNKS2
GO:0046718	viral entry into host cell	biological_process	0.170921	4	7	EPS15;ITGAV;NPC1;XPR1
GO:0010634	positive regulation of epithelial cell migration	biological_process	0.170921	4	7	CAPN7;CTSH;DOCK5;PRKCE
GO:0042102	positive regulation of T cell proliferation	biological_process	0.170921	4	7	DNAJA3;IL6ST;JAK3;TFRC
GO:0016529	sarcoplasmic reticulum	cellular_component	0.170921	4	7	CACNA2D1;CAMK2D;RYR2;SYNE2
GO:0046332	SMAD binding	molecular_function	0.170921	4	7	ACVR1;BMPR1B;IPO7;SMAD2
GO:0010839	negative regulation of keratinocyte proliferation	biological_process	0.170921	4	7	CASK;CD109;EFNB2;PTPRK
GO:0004879	RNA polymerase II transcription factor activity, ligand-activated sequence-specific DNA binding	molecular_function	0.170921	4	7	AR;NR1H3;NR4A3;PPARG
GO:0043621	protein self-association	molecular_function	0.170921	4	7	CCDC88C;KCTD9;RYR2;ZFYVE27
GO:0071480	cellular response to gamma radiation	biological_process	0.170921	4	7	KDM1A;TLK2;XRCC5;YAP1
GO:0042391	regulation of membrane potential	biological_process	0.170921	4	7	DLG1;ENSSSCG00000006045;ENSSSCG00000026527;KIF5B
GO:0007010	cytoskeleton organization	biological_process	0.173137	11	25	ANK3;CNN2;DST;ENSSSCG00000004473;GAN;LARP4;MAP3K20;PRPF40A;QRICH1;SS18;ZRANB1
GO:0005737	cytoplasm	cellular_component	0.173801	259	747	ABTB2;ACO1;ADAM10;AFDN;AGL;AGO4;AHCTF1;ALDH18A1;AMBRA1;ANKHD1;ANKIB1;ANKRD17;ANXA2;AP1G1;APBB2;AR;ARFIP1;ARHGAP6;ARHGEF12;ARHGEF2;ARL6;ARMC1;BCAS3;BIRC6;BRAF;BRD2;BTRC;CAMK2D;CAPZB;CASK;CCDC88C;CDC14A;CDK14;CFLAR;CHCHD3;CPEB1;CPEB2;CPEB3;CPEB4;CREBBP;CYFIP2;DENND6A;DGKH;DHX15;DHX40;DIP2B;DLG1;DOCK5;EIF2B3;EIF2S1;ENO1;ENSSSCG00000000152;ENSSSCG00000000884;ENSSSCG00000001549;ENSSSCG00000001922;ENSS…
GO:0006812	cation transport	biological_process	0.17452	6	12	SLC41A1;SLC41A2;SLC9A6;SLC9B1;STIM1;TRPM7
GO:0008584	male gonad development	biological_process	0.17452	6	12	AGO4;AR;H3F3A;KIT;SMAD4;YBX3
GO:0021915	neural tube development	biological_process	0.17452	6	12	AMBRA1;C2CD3;KDM6A;NF1;PKD2;TBC1D32
GO:0007050	cell cycle arrest	biological_process	0.17452	6	12	APBB2;MAP3K20;PKD2;RB1;THBS1;WHAMM
GO:0007286	spermatid development	biological_process	0.17452	6	12	H3F3A;ICA1L;KIT;NECTIN3;PANK2;STRBP
GO:0043010	camera-type eye development	biological_process	0.17452	6	12	BMPR1B;CC2D2A;CHD7;FBN2;RAB3GAP1;TBC1D32
GO:0005913	cell-cell adherens junction	cellular_component	0.17452	6	12	AFDN;ANXA2;ENSSSCG00000008250;MYH9;NECTIN3;TMOD3
GO:0031625	ubiquitin protein ligase binding	molecular_function	0.185174	24	61	ABTB2;ACTG1;AMBRA1;CUL1;CUL2;ENSSSCG00000016234;FAF1;FAF2;FBXO7;GPI;GSK3B;HSPA5;LRPPRC;MDM2;NDUFS2;RB1;SMAD2;SMG5;SNX9;UBE2H;UBE2K;UBE2W;USP25;XRCC5
GO:0035023	regulation of Rho protein signal transduction	biological_process	0.186148	9	20	ARHGEF12;ARHGEF2;ENSSSCG00000002260;ENSSSCG00000004065;ENSSSCG00000009551;ENSSSCG00000021656;FGD6;SOS2;TIAM1
GO:0000209	protein polyubiquitination	biological_process	0.196894	13	31	ANKIB1;BTRC;ENSSSCG00000001922;ENSSSCG00000008176;ENSSSCG00000021149;ENSSSCG00000025632;HUWE1;LONRF3;RNF111;RNF14;TNKS2;UBE2K;UBE2W
GO:0042787	protein ubiquitination involved in ubiquitin-dependent protein catabolic process	biological_process	0.196894	13	31	ABTB2;ANKIB1;CUL1;CUL2;ENSSSCG00000001922;ENSSSCG00000016234;ENSSSCG00000021149;ENSSSCG00000025632;FBXO7;KLHL3;MDM2;RNF111;RNF14
GO:0008201	heparin binding	molecular_function	0.199182	7	15	APLP2;CRISPLD2;ENSSSCG00000001695;PCOLCE2;SERPINE2;THBS1;ZNF207
GO:0002020	protease binding	molecular_function	0.199182	7	15	ANXA2;CCBE1;CFLAR;GSK3B;IL1R1;ITGAV;KIT
GO:0016337	single organismal cell-cell adhesion	biological_process	0.199182	7	15	CYFIP2;DLG1;DSP;FAT1;MYH9;NECTIN3;VMP1
GO:0045766	positive regulation of angiogenesis	biological_process	0.199182	7	15	CCBE1;CTSH;ENSSSCG00000001695;PRKCA;PRKD2;THBS1;VASH2
GO:0005262	calcium channel activity	molecular_function	0.199182	7	15	ENSSSCG00000000555;ENSSSCG00000007100;PKD2;RYR2;TRPC1;TRPC4;TRPM7
GO:0006464	cellular protein modification process	biological_process	0.199182	7	15	ENSSSCG00000011553;ENSSSCG00000012059;PCMTD1;TTL;TTLL7;UBA1;UEVLD
GO:0030027	lamellipodium	cellular_component	0.199182	7	15	ACTR3;CAPZB;CARMIL1;FAT1;PKD2;PKN2;PTPN13
GO:0004713	protein tyrosine kinase activity	molecular_function	0.199182	7	15	BAZ1B;ENSSSCG00000016160;IGF1R;JAK2;JAK3;KIT;WEE1
GO:0006486	protein glycosylation	biological_process	0.199182	7	15	ENSSSCG00000009502;ENSSSCG00000015857;FUT8;GALNT11;GALNT2;NPC1;STT3B
GO:0003143	embryonic heart tube morphogenesis	biological_process	0.207663	3	5	ACVR1;RYR2;YAP1
GO:0001702	gastrulation with mouth forming second	biological_process	0.207663	3	5	ACVR1;SMAD4;UGDH
GO:0010975	regulation of neuron projection development	biological_process	0.207663	3	5	ENSSSCG00000021111;FBXO7;GSK3B
GO:0030659	cytoplasmic vesicle membrane	cellular_component	0.207663	3	5	HTT;KIF1B;SNX9
GO:0009451	RNA modification	biological_process	0.207663	3	5	CDKAL1;LRPPRC;TRUB1
GO:0030315	T-tubule	cellular_component	0.207663	3	5	CACNA2D1;CAMK2D;KCNN2
GO:0097009	energy homeostasis	biological_process	0.207663	3	5	ACACB;NR4A3;PRCP
GO:0055088	lipid homeostasis	biological_process	0.207663	3	5	ACACA;COL4A3BP;NR1H3
GO:0033613	activating transcription factor binding	molecular_function	0.207663	3	5	EP300;PPARG;SMAD2
GO:0045600	positive regulation of fat cell differentiation	biological_process	0.207663	3	5	PPARG;SH3PXD2B;STK3
GO:0010875	positive regulation of cholesterol efflux	biological_process	0.207663	3	5	ABCA7;NR1H3;PPARG
GO:0051983	regulation of chromosome segregation	biological_process	0.207663	3	5	MKI67;PUM2;ZNF207
GO:0031334	positive regulation of protein complex assembly	biological_process	0.207663	3	5	ENSSSCG00000001695;FAF1;GSK3B
GO:0043001	Golgi to plasma membrane protein transport	biological_process	0.207663	3	5	ANK3;GOLGA4;MACF1
GO:0048010	vascular endothelial growth factor receptor signaling pathway	biological_process	0.207663	3	5	ENSSSCG00000001695;NRP1;PRKD2
GO:0002042	cell migration involved in sprouting angiogenesis	biological_process	0.207663	3	5	EFNB2;ENSSSCG00000001695;NRP1
GO:0002092	positive regulation of receptor internalization	biological_process	0.207663	3	5	AHI1;ATAD1;ENSSSCG00000001695
GO:0030488	tRNA methylation	biological_process	0.207663	3	5	ENSSSCG00000011041;MTO1;TARBP1
GO:0004596	peptide alpha-N-acetyltransferase activity	molecular_function	0.207663	3	5	NAA15;NAA16;NAA25
GO:0007585	respiratory gaseous exchange	biological_process	0.207663	3	5	CCBE1;FUT8;PBX3
GO:0032391	photoreceptor connecting cilium	cellular_component	0.207663	3	5	IFT52;IQCB1;MYO7A
GO:0051393	alpha-actinin binding	molecular_function	0.207663	3	5	KCNN2;MAGI1;PPARG
GO:0010608	posttranscriptional regulation of gene expression	biological_process	0.207663	3	5	ENSSSCG00000005575;PUM2;RC3H1
GO:1900026	positive regulation of substrate adhesion-dependent cell spreading	biological_process	0.207663	3	5	BRAF;CARMIL1;DOCK5
GO:0035357	peroxisome proliferator activated receptor signaling pathway	biological_process	0.207663	3	5	ENSSSCG00000029697;PDK3;PPARG
GO:0051496	positive regulation of stress fiber assembly	biological_process	0.207663	3	5	BRAF;CARMIL1;SH3PXD2B
GO:0009898	cytoplasmic side of plasma membrane	cellular_component	0.207663	3	5	DLG1;ENSSSCG00000002003;PTPN4
GO:0048660	regulation of smooth muscle cell proliferation	biological_process	0.207663	3	5	NR4A3;PRKDC;XRCC5
GO:0007520	myoblast fusion	biological_process	0.207663	3	5	ENSSSCG00000010476;GSK3B;MYH9
GO:0048675	axon extension	biological_process	0.207663	3	5	MAP1B;SLC9A6;USP9X
GO:0005546	phosphatidylinositol-4,5-bisphosphate binding	molecular_function	0.207663	3	5	ANXA2;EXOC1;KRIT1
GO:0034504	protein localization to nucleus	biological_process	0.207663	3	5	ABCA7;MDM2;SYNE2
GO:0030139	endocytic vesicle	cellular_component	0.207663	3	5	KIF5B;PLD1;RAPGEF2
GO:0004579	dolichyl-diphosphooligosaccharide-protein glycotransferase activity	molecular_function	0.207663	3	5	MAGT1;STT3B;TUSC3
GO:0001227	transcriptional repressor activity, RNA polymerase II transcription regulatory region sequence-specific binding	molecular_function	0.207663	3	5	CHCHD3;FOXO3;YBX3
GO:0005697	telomerase holoenzyme complex	cellular_component	0.207663	3	5	ENSSSCG00000017826;GNL3L;SMG5
GO:0003281	ventricular septum development	biological_process	0.207663	3	5	ENSSSCG00000014343;LTBP1;MDM2
GO:0033627	cell adhesion mediated by integrin	biological_process	0.207663	3	5	ITGA2;ITGA5;ITGAV
GO:0043531	ADP binding	molecular_function	0.207663	3	5	ENSSSCG00000000884;MYH10;MYH9
GO:0007163	establishment or maintenance of cell polarity	biological_process	0.207663	3	5	ACTR3;FAT1;SYNE2
GO:0007032	endosome organization	biological_process	0.207663	3	5	ARFGEF2;DNAJC13;ENSSSCG00000010525
GO:0005496	steroid binding	molecular_function	0.207663	3	5	AR;ESR1;PGR
GO:0032435	negative regulation of proteasomal ubiquitin-dependent protein catabolic process	biological_process	0.207663	3	5	MTM1;TLK2;WAC
GO:0048820	hair follicle maturation	biological_process	0.207663	3	5	MYO5A;NF1;TRPC4AP
GO:0042177	negative regulation of protein catabolic process	biological_process	0.207663	3	5	MDM4;SERPINE2;SNX12
GO:0051219	phosphoprotein binding	molecular_function	0.207663	3	5	PAFAH1B1;PKD2;RB1
GO:0031072	heat shock protein binding	molecular_function	0.207663	3	5	DNAJA3;ENSSSCG00000001549;FAF1
GO:0001841	neural tube formation	biological_process	0.207663	3	5	IFT52;MIB1;STK3
GO:0032465	regulation of cytokinesis	biological_process	0.207663	3	5	BIRC6;PRPF40A;UVRAG
GO:0006368	transcription elongation from RNA polymerase II promoter	biological_process	0.207663	3	5	CDK13;ELL2;SETD2
GO:0070064	proline-rich region binding	molecular_function	0.207663	3	5	PRPF40A;TCERG1;YAP1
GO:0030133	transport vesicle	cellular_component	0.207663	3	5	AP1AR;CRISPLD2;YIPF1
GO:0034968	histone lysine methylation	biological_process	0.207663	3	5	ENSSSCG00000006508;NSD3;SETD2
GO:0006541	glutamine metabolic process	biological_process	0.207663	3	5	CTPS2;GGH;GLS
GO:0006336	DNA replication-independent nucleosome assembly	biological_process	0.207663	3	5	ATRX;H3F3A;HIRA
GO:0001968	fibronectin binding	molecular_function	0.207663	3	5	CTSS;ITGAV;THBS1
GO:0005543	phospholipid binding	molecular_function	0.207663	3	5	ARHGAP26;ENSSSCG00000014913;PLA2G7
GO:0010862	positive regulation of pathway-restricted SMAD protein phosphorylation	biological_process	0.207663	3	5	ACVR1;RBPMS;SMAD4
GO:0030177	positive regulation of Wnt signaling pathway	biological_process	0.207663	3	5	MBD2;WLS;ZRANB1
GO:0070584	mitochondrion morphogenesis	biological_process	0.207663	3	5	COL4A3BP;MTM1;PANK2
GO:0015095	magnesium ion transmembrane transporter activity	molecular_function	0.207663	3	5	MRS2;SLC41A1;TUSC3
GO:0001953	negative regulation of cell-matrix adhesion	biological_process	0.207663	3	5	CASK;NF1;THBS1
GO:2000134	negative regulation of G1/S transition of mitotic cell cycle	biological_process	0.207663	3	5	FBXO7;PKD2;RB1
GO:0070613	regulation of protein processing	biological_process	0.207663	3	5	IFT52;INPP5B;LDLRAD3
GO:0001935	endothelial cell proliferation	biological_process	0.207663	3	5	DLG1;PRKX;SCARB1
GO:0034451	centriolar satellite	cellular_component	0.207663	3	5	C2CD3;CEP131;KIAA0753
GO:0030030	cell projection organization	biological_process	0.207663	3	5	CAPZB;MYO7A;WDR35
GO:0060324	face development	biological_process	0.207663	3	5	BRAF;CHD7;MAPK1
GO:0072358	cardiovascular system development	biological_process	0.207663	3	5	ARID2;KDM6A;NXN
GO:0030515	snoRNA binding	molecular_function	0.207663	3	5	DDX21;HEATR1;UTP6
GO:0003712	transcription cofactor activity	molecular_function	0.209959	5	10	CREBBP;EP300;MED14;TRRAP;ZMYND8
GO:0030509	BMP signaling pathway	biological_process	0.209959	5	10	ACVR1;BMPR1B;RYR2;SMAD4;USP9X
GO:0005518	collagen binding	molecular_function	0.209959	5	10	CCBE1;CTSS;ITGA2;PCOLCE2;SMAD4
GO:0048015	phosphatidylinositol-mediated signaling	biological_process	0.209959	5	10	ENSSSCG00000021203;EXOC1;IGF1R;INPP5F;PI4KA
GO:0006814	sodium ion transport	biological_process	0.209959	5	10	ATP1A1;ENSSSCG00000024299;SLC23A1;SLC9A6;SLC9B1
GO:0050885	neuromuscular process controlling balance	biological_process	0.209959	5	10	HERC1;HEXA;MYH10;NR4A3;PAFAH1B1
GO:0003007	heart morphogenesis	biological_process	0.209959	5	10	ARID2;BAZ1B;CHD7;COL4A3BP;KDM6A
GO:0008344	adult locomotory behavior	biological_process	0.209959	5	10	FGF12;INPP5F;PAFAH1B1;PBX3;TMOD1
GO:0016485	protein processing	biological_process	0.209959	5	10	ADAM10;C2CD3;CTSS;MMP16;PSEN1
GO:0010008	endosome membrane	cellular_component	0.209959	5	10	ANKFY1;CLCN5;DNAJC13;UBA1;VPS26A
GO:0031647	regulation of protein stability	biological_process	0.209959	5	10	FBXO7;GNL3L;LAMP2;SUGT1;TADA2A
GO:0006635	fatty acid beta-oxidation	biological_process	0.209959	5	10	ACADM;ACAT1;CROT;HADHA;SLC25A17
GO:0030097	hemopoiesis	biological_process	0.209959	5	10	ADD2;CDK13;CNN2;KIT;MYO1E
GO:0051209	release of sequestered calcium ion into cytosol	biological_process	0.209959	5	10	IBTK;PKD2;PRKCE;RASA3;RYR2
GO:0019898	extrinsic component of membrane	cellular_component	0.218817	8	18	ENSSSCG00000004199;ENSSSCG00000006877;ENSSSCG00000028707;EPB41L1;SNX12;SNX30;SNX5;WDFY3
GO:0046872	metal ion binding	molecular_function	0.225312	110	312	ACACA;ACACB;ACVR1;ADAM10;AEBP2;ANKFY1;ANKIB1;ANTXR2;AOX1;AR;ARHGEF2;ARID2;ARMC1;ATP10D;ATP1A1;BAZ1A;BAZ1B;BMP1;BRAF;CDC42BPA;CDC42BPB;CREBBP;CU571095.1;DNAJA3;ENSSSCG00000001493;ENSSSCG00000001922;ENSSSCG00000002003;ENSSSCG00000004123;ENSSSCG00000004857;ENSSSCG00000005575;ENSSSCG00000006508;ENSSSCG00000006757;ENSSSCG00000008176;ENSSSCG00000008576;ENSSSCG00000010488;ENSSSCG00000011772;ENSSSCG00000…
GO:0030425	dendrite	cellular_component	0.226181	12	29	BRINP3;CPEB4;ENSSSCG00000010525;FZD3;GPHN;HTT;IL6ST;INPP5F;NF1;PTPRK;SLC9A6;ZFYVE27
GO:0031410	cytoplasmic vesicle	cellular_component	0.236301	13	32	ADD2;AGFG1;CADPS2;ENSSSCG00000009241;ITGA5;MARVELD2;MIB1;SENP2;SLC9A6;SNX9;TFRC;USP6NL;WLS
GO:0030336	negative regulation of cell migration	biological_process	0.23747	6	13	ABHD6;ARID2;CNN2;NF1;PTPRK;ZMYND8
GO:0045444	fat cell differentiation	biological_process	0.23747	6	13	ARL6;ENSSSCG00000029697;EP300;GSK3B;NR4A3;SENP2
GO:0031338	regulation of vesicle fusion	biological_process	0.23747	6	13	ENSSSCG00000006901;TBC1D14;TBC1D22A;TBC1D8;TBC1D8B;USP6NL
GO:0035725	sodium ion transmembrane transport	biological_process	0.23747	6	13	ENSSSCG00000007100;ENSSSCG00000026527;PKD2;SLC23A1;SLC41A1;SLC9A6
GO:0001726	ruffle	cellular_component	0.23747	6	13	MKLN1;MTM1;MTMR14;MYH9;MYO5A;TRPM7
GO:0044325	ion channel binding	molecular_function	0.23747	6	13	ANK2;CAMK2D;DLG1;ENSSSCG00000006045;HTT;PKD2
GO:0070588	calcium ion transmembrane transport	biological_process	0.248366	10	24	CACNA2D1;CACNB1;ENSSSCG00000000555;ENSSSCG00000007100;ITGAV;PKD2;RYR2;TRPC1;TRPC4;TRPM7
GO:0019901	protein kinase binding	molecular_function	0.248769	26	69	ADAM10;ANK2;CDK13;DLG1;ENSSSCG00000009898;EXOC2;FAF1;FBXO7;FOXO3;GSK3B;IBTK;JAK2;KIF11;KIZ;MAP3K2;MVP;NEK9;NR4A3;PARP1;PTPRK;RICTOR;RPS6KA3;RYR2;SPRED1;TBC1D14;WNK1
GO:0006139	nucleobase-containing compound metabolic process	biological_process	0.255587	4	8	ENSSSCG00000003773;ENSSSCG00000003808;SRBD1;XRN2
GO:0043154	negative regulation of cysteine-type endopeptidase activity involved in apoptotic process	biological_process	0.255587	4	8	CD44;MKL1;RPS6KA3;THBS1
GO:0008333	endosome to lysosome transport	biological_process	0.255587	4	8	ENSSSCG00000023518;MTM1;SNX27;TRAK1
GO:0042632	cholesterol homeostasis	biological_process	0.255587	4	8	NPC1;NR1H3;SCARB1;SOAT1
GO:0005245	voltage-gated calcium channel activity	molecular_function	0.255587	4	8	CACNA2D1;CACNB1;ITGAV;PKD2
GO:0000186	activation of MAPKK activity	biological_process	0.255587	4	8	BRAF;ENSSSCG00000026041;MAP3K15;MAP3K20
GO:0019843	rRNA binding	molecular_function	0.255587	4	8	DDX21;PPAN;PTCD3;RPF2
GO:0018279	protein N-linked glycosylation via asparagine	biological_process	0.255587	4	8	FUT8;MAGT1;STT3B;TUSC3
GO:0032880	regulation of protein localization	biological_process	0.255587	4	8	AAK1;AFDN;MMD;RAB14
GO:0051262	protein tetramerization	biological_process	0.255587	4	8	IGF1R;ME1;MTMR2;TRPM7
GO:0001078	transcriptional repressor activity, RNA polymerase II core promoter proximal region sequence-specific binding	molecular_function	0.255587	4	8	AEBP2;CREBBP;NR2C1;PRDM5
GO:0004715	non-membrane spanning protein tyrosine kinase activity	molecular_function	0.255587	4	8	JAK2;JAK3;MELK;WEE1
GO:0032266	phosphatidylinositol-3-phosphate binding	molecular_function	0.255587	4	8	SH3PXD2B;SNX24;SNX27;ZFYVE26
GO:0006955	immune response	biological_process	0.255587	4	8	CTSH;CTSS;IGF1R;THBS1
GO:0090503	RNA phosphodiester bond hydrolysis, exonucleolytic	biological_process	0.255587	4	8	CNOT1;ENSSSCG00000022177;PAN3;XRN2
GO:0006351	transcription, DNA-templated	biological_process	0.256628	28	75	AR;ENSSSCG00000000169;ENSSSCG00000008171;ENSSSCG00000008575;ENSSSCG00000008909;ENSSSCG00000013397;ENSSSCG00000013742;ENSSSCG00000026524;ESR1;FOXO3;GTF2I;HDAC2;HIRA;INO80;MED27;NCOA1;NCOA3;NR1H3;NR2C1;NR4A3;PGR;POLR1A;PPARG;SMAD2;SMAD4;SMAD5;SWT1;ZNF18
GO:0005794	Golgi apparatus	cellular_component	0.256782	56	156	ABCA7;ACO1;ADAM10;AP1AR;AP1G1;ARFGAP3;BIRC6;CD44;CDK13;CLCN5;COL4A3BP;COQ6;DENND4C;DLG1;ENSSSCG00000014828;ENSSSCG00000026007;ERCC6;FBXW8;FUT8;FYCO1;GALNT11;GALNT2;GBF1;GDI2;GOLGA4;HTT;INPPL1;ITGA5;ITM2B;KIF1C;MACF1;MAPK1;MGAT5;MMD;MPHOSPH9;MYO5A;NAA25;NDFIP2;NPC1;OSBPL9;PLD1;PPHLN1;PPP2R5C;PREPL;PRKCE;PRKG1;PSEN1;RAB3GAP1;SLC38A10;TBC1D14;TRRAP;USO1;WLS;YIPF1;ZDHHC3;ZDHHC7
GO:0050910	detection of mechanical stimulus involved in sensory perception of sound	biological_process	0.257336	2	3	KIT;PCDH15
GO:0001940	male pronucleus	cellular_component	0.257336	2	3	RIF1;TET3
GO:0050840	extracellular matrix binding	molecular_function	0.257336	2	3	ITGAV;THBS1
GO:0098641	cadherin binding involved in cell-cell adhesion	molecular_function	0.257336	2	3	ANXA2;TMOD3
GO:0030902	hindbrain development	biological_process	0.257336	2	3	AHI1;WLS
GO:0060088	auditory receptor cell stereocilium organization	biological_process	0.257336	2	3	MYO7A;PCDH15
GO:0019217	regulation of fatty acid metabolic process	biological_process	0.257336	2	3	PANK2;SCAP
GO:0005539	glycosaminoglycan binding	molecular_function	0.257336	2	3	CRISPLD2;SERPINE2
GO:0031415	NatA complex	cellular_component	0.257336	2	3	NAA15;NAA16
GO:0008324	cation transmembrane transporter activity	molecular_function	0.257336	2	3	SLC41A1;SLC41A2
GO:0001527	microfibril	cellular_component	0.257336	2	3	FBN2;LTBP1
GO:0030041	actin filament polymerization	biological_process	0.257336	2	3	ENSSSCG00000025598;TTC17
GO:1903061	positive regulation of protein lipidation	biological_process	0.257336	2	3	RAB3GAP1;RAB3GAP2
GO:0010887	negative regulation of cholesterol storage	biological_process	0.257336	2	3	NR1H3;PPARG
GO:0048763	calcium-induced calcium release activity	molecular_function	0.257336	2	3	PKD2;RYR2
GO:0030878	thyroid gland development	biological_process	0.257336	2	3	BRAF;MAPK1
GO:0070412	R-SMAD binding	molecular_function	0.257336	2	3	SMAD2;SMAD4
GO:2000145	regulation of cell motility	biological_process	0.257336	2	3	INPP5F;PKN2
GO:0009060	aerobic respiration	biological_process	0.257336	2	3	MTFR1;PANK2
GO:0034663	endoplasmic reticulum chaperone complex	cellular_component	0.257336	2	3	HSP90B1;HSPA5
GO:0045071	negative regulation of viral genome replication	biological_process	0.257336	2	3	SRPK1;SRPK2
GO:0055003	cardiac myofibril assembly	biological_process	0.257336	2	3	FHOD3;MYH10
GO:0001894	tissue homeostasis	biological_process	0.257336	2	3	ACACA;RB1
GO:0030552	cAMP binding	molecular_function	0.257336	2	3	ENSSSCG00000026527;RAPGEF2
GO:0044615	nuclear pore nuclear basket	cellular_component	0.257336	2	3	NUP214;NUP98
GO:0035371	microtubule plus-end	cellular_component	0.257336	2	3	MYO5A;SPAG5
GO:0044458	motile cilium assembly	biological_process	0.257336	2	3	CC2D2A;SPATA6
GO:0001784	phosphotyrosine binding	molecular_function	0.257336	2	3	ENSSSCG00000022486;MAPK1
GO:0031519	PcG protein complex	cellular_component	0.257336	2	3	CSNK2A2;PHC3
GO:0060020	Bergmann glial cell differentiation	biological_process	0.257336	2	3	MAPK1;VIM
GO:2000727	positive regulation of cardiac muscle cell differentiation	biological_process	0.257336	2	3	EFNB2;GSK3B
GO:0030427	site of polarized growth	cellular_component	0.257336	2	3	ENSSSCG00000008826;ENSSSCG00000008827
GO:0050768	negative regulation of neurogenesis	biological_process	0.257336	2	3	ARHGEF2;KDM1A
GO:0097431	mitotic spindle pole	cellular_component	0.257336	2	3	NIN;NUMA1
GO:0043596	nuclear replication fork	cellular_component	0.257336	2	3	BAZ1B;SMARCAD1
GO:1904355	positive regulation of telomere capping	NA	0.257336	2	3	MAPK1;TNKS2
GO:0002250	adaptive immune response	biological_process	0.257336	2	3	CTSH;CTSS
GO:0004540	ribonuclease activity	molecular_function	0.257336	2	3	ENSSSCG00000017826;SMG5
GO:0048278	vesicle docking	biological_process	0.257336	2	3	EXOC5;STX17
GO:0034612	response to tumor necrosis factor	biological_process	0.257336	2	3	ADAM10;JAK2
GO:0046677	response to antibiotic	biological_process	0.257336	2	3	JAK2;MDM2
GO:0090303	positive regulation of wound healing	biological_process	0.257336	2	3	ARHGEF2;PRKCE
GO:0046972	histone acetyltransferase activity (H4-K16)specific	molecular_function	0.257336	1	3	KANSL1
GO:0071679	commissural neuron axon guidance	biological_process	0.257336	2	3	FZD3;NRP1
GO:0045178	basal part of cell	cellular_component	0.257336	2	3	ITGA2;PRCP
GO:0015279	store-operated calcium channel activity	molecular_function	0.257336	2	3	TRPC1;TRPC4
GO:0008543	fibroblast growth factor receptor signaling pathway	biological_process	0.257336	2	3	ENSSSCG00000010698;RAB14
GO:0060218	hematopoietic stem cell differentiation	biological_process	0.257336	2	3	CHD2;XRCC5
GO:0001921	positive regulation of receptor recycling	biological_process	0.257336	2	3	ANXA2;INPP5F
GO:0017025	TBP-class protein binding	molecular_function	0.257336	2	3	PSMC6;YEATS2
GO:0043487	regulation of RNA stability	biological_process	0.257336	2	3	ENSSSCG00000017826;SMG5
GO:0060117	auditory receptor cell development	biological_process	0.257336	2	3	PAFAH1B1;SLC4A7
GO:0043236	laminin binding	molecular_function	0.257336	2	3	CTSS;THBS1
GO:0031258	lamellipodium membrane	cellular_component	0.257336	2	3	ITGAV;SYNE2
GO:0043995	histone acetyltransferase activity (H4-K5)specific	molecular_function	0.257336	1	3	KANSL1
GO:0043525	positive regulation of neuron apoptotic process	biological_process	0.257336	2	3	FOXO3;NF1
GO:0061549	sympathetic ganglion development	biological_process	0.257336	2	3	FZD3;NRP1
GO:0097546	ciliary base	cellular_component	0.257336	2	3	CEP126;IFT52
GO:0046488	phosphatidylinositol metabolic process	biological_process	0.257336	2	3	ENSSSCG00000013490;MTMR2
GO:0004075	biotin carboxylase activity	molecular_function	0.257336	2	3	ACACA;ACACB
GO:2000737	negative regulation of stem cell differentiation	biological_process	0.257336	2	3	CDK13;YAP1
GO:2001141	regulation of RNA biosynthetic process	biological_process	0.257336	2	3	NCOA1;NCOA3
GO:1901216	positive regulation of neuron death	biological_process	0.257336	2	3	EIF2S1;GSK3B
GO:0097150	neuronal stem cell population maintenance	biological_process	0.257336	2	3	FOXO3;SS18
GO:0008219	cell death	biological_process	0.257336	2	3	FAF1;PRKD2
GO:0016620	oxidoreductase activity, acting on the aldehyde or oxo group of donors, NAD or NADP as acceptor	molecular_function	0.257336	2	3	ALDH18A1;ALDH7A1
GO:0031091	platelet alpha granule	cellular_component	0.257336	2	3	SERPINE2;THBS1
GO:0035729	cellular response to hepatocyte growth factor stimulus	biological_process	0.257336	2	3	GSK3B;NRP1
GO:0047497	mitochondrion transport along microtubule	biological_process	0.257336	2	3	KIF1B;MAP1B
GO:0003073	regulation of systemic arterial blood pressure	biological_process	0.257336	2	3	AR;NCALD
GO:0033151	VDJ recombination	biological_process	0.257336	2	3	DCAF1;PRKDC
GO:2000045	regulation of G1/S transition of mitotic cell cycle	biological_process	0.257336	2	3	INO80;SENP2
GO:0046622	positive regulation of organ growth	biological_process	0.257336	2	3	YAP1;YBX3
GO:0015936	coenzyme A metabolic process	biological_process	0.257336	2	3	ACAT1;CROT
GO:0033598	mammary gland epithelial cell proliferation	biological_process	0.257336	2	3	BTRC;MAPK1
GO:0097320	plasma membrane tubulation	biological_process	0.257336	2	3	SNX9;WHAMM
GO:0048667	cell morphogenesis involved in neuron differentiation	biological_process	0.257336	2	3	HEXA;RB1
GO:0034113	heterotypic cell-cell adhesion	biological_process	0.257336	2	3	ITGA5;ITGAV
GO:0043034	costamere	cellular_component	0.257336	2	3	ANK2;ANK3
GO:0043330	response to exogenous dsRNA	biological_process	0.257336	2	3	DDX21;MAPK1
GO:0060391	positive regulation of SMAD protein import into nucleus	biological_process	0.257336	2	3	RBPMS;SMAD4
GO:0030169	low-density lipoprotein particle binding	molecular_function	0.257336	2	3	SCARB1;THBS1
GO:0043198	dendritic shaft	cellular_component	0.257336	2	3	ARHGEF2;GSK3B
GO:0060411	cardiac septum morphogenesis	biological_process	0.257336	2	3	CHD7;MDM2
GO:0042629	mast cell granule	cellular_component	0.257336	2	3	KIT;NR4A3
GO:0000463	maturation of LSU-rRNA from tricistronic rRNA transcript(SSU-rRNA, 5.8S rRNA, LSU-rRNA)	biological_process	0.257336	1	3	RPF2
GO:0006828	manganese ion transport	biological_process	0.257336	2	3	TRPC1;TRPC4
GO:0001939	female pronucleus	cellular_component	0.257336	2	3	RIF1;TET3
GO:0070411	I-SMAD binding	molecular_function	0.257336	2	3	SMAD2;SMAD4
GO:0030949	positive regulation of vascular endothelial growth factor receptor signaling pathway	biological_process	0.257336	2	3	GRB10;PRKD2
GO:0060213	positive regulation of nuclear-transcribed mRNA polyA tail shortening	biological_process	0.257336	2	3	CNOT1;CPEB3
GO:0004822	isoleucine-tRNA ligase activity	molecular_function	0.257336	2	3	ENSSSCG00000008068;ENSSSCG00000029797
GO:0004653	polypeptide N-acetylgalactosaminyltransferase activity	molecular_function	0.257336	2	3	GALNT11;GALNT2
GO:0061014	positive regulation of mRNA catabolic process	biological_process	0.257336	2	3	CNOT1;RC3H1
GO:2000353	positive regulation of endothelial cell apoptotic process	biological_process	0.257336	2	3	PDCD4;THBS1
GO:0070628	proteasome binding	molecular_function	0.257336	2	3	PSMD14;PSME4
GO:0004470	malic enzyme activity	molecular_function	0.257336	2	3	ME1;ME2
GO:0071889	14-3-3 protein binding	molecular_function	0.257336	2	3	PRKCE;TBC1D22A
GO:0005520	insulin-like growth factor binding	molecular_function	0.257336	2	3	IGF1R;IGFBP4
GO:0010961	cellular magnesium ion homeostasis	biological_process	0.257336	2	3	SLC41A1;TRPM7
GO:0042594	response to starvation	biological_process	0.257336	2	3	ACADM;BCAS3
GO:0043014	alpha-tubulin binding	molecular_function	0.257336	2	3	INO80;TTLL7
GO:0010596	negative regulation of endothelial cell migration	biological_process	0.257336	2	3	KRIT1;THBS1
GO:0042517	positive regulation of tyrosine phosphorylation of Stat3 protein	biological_process	0.257336	2	3	IL6ST;KIT
GO:0009306	protein secretion	biological_process	0.257336	2	3	ARFGAP3;PAFAH1B1
GO:0090188	negative regulation of pancreatic juice secretion	biological_process	0.257336	2	3	NR1H3;WNK1
GO:0009968	negative regulation of signal transduction	biological_process	0.257336	2	3	ACVR1;BRAF
GO:0050892	intestinal absorption	biological_process	0.257336	2	3	ACO1;SCARB1
GO:0035924	cellular response to vascular endothelial growth factor stimulus	biological_process	0.257336	2	3	NRP1;PRKD2
GO:2000273	positive regulation of receptor activity	biological_process	0.257336	2	3	BAZ1B;PRKCE
GO:0016504	peptidase activator activity	molecular_function	0.257336	2	3	PCOLCE2;PSME4
GO:0010314	phosphatidylinositol-5-phosphate binding	molecular_function	0.257336	2	3	SH3PXD2B;SNX24
GO:1902166	negative regulation of intrinsic apoptotic signaling pathway in response to DNA damage by p53 class mediator	biological_process	0.257336	2	3	CD44;KDM1A
GO:0030976	thiamine pyrophosphate binding	molecular_function	0.257336	2	3	ILVBL;OGDH
GO:0031313	extrinsic component of endosome membrane	cellular_component	0.257336	2	3	ENSSSCG00000023518;SNX5
GO:0097264	self proteolysis	biological_process	0.257336	2	3	CAPN7;ENSSSCG00000014894
GO:0007257	activation of JUN kinase activity	biological_process	0.257336	2	3	ERCC6;MAP3K20
GO:0008631	intrinsic apoptotic signaling pathway in response to oxidative stress	biological_process	0.257336	2	3	ENSSSCG00000026041;MELK
GO:0002088	lens development in camera-type eye	biological_process	0.257336	2	3	DLG1;TBC1D32
GO:0018243	protein O-linked glycosylation via threonine	biological_process	0.257336	2	3	GALNT11;GALNT2
GO:0006641	triglyceride metabolic process	biological_process	0.257336	2	3	ENSSSCG00000003828;INSIG1
GO:0044291	cell-cell contact zone	cellular_component	0.257336	2	3	NECTIN3;TIAM1
GO:0048066	developmental pigmentation	biological_process	0.257336	2	3	KIT;MYO5A
GO:0070328	triglyceride homeostasis	biological_process	0.257336	2	3	NR1H3;SCARB1
GO:0060674	placenta blood vessel development	biological_process	0.257336	2	3	PKD2;VASH2
GO:0048505	regulation of timing of cell differentiation	biological_process	0.257336	2	3	GDPD5;SERPINE2
GO:0030057	desmosome	cellular_component	0.257336	2	3	DSP;UBA1
GO:0048268	clathrin coat assembly	biological_process	0.257336	2	3	ENSSSCG00000014913;EPS15
GO:1903827	regulation of cellular protein localization	NA	0.257336	2	3	KDM1A;PARP1
GO:0006428	isoleucyl-tRNA aminoacylation	biological_process	0.257336	2	3	ENSSSCG00000008068;ENSSSCG00000029797
GO:0043996	histone acetyltransferase activity (H4-K8)specific	molecular_function	0.257336	1	3	KANSL1
GO:0015908	fatty acid transport	biological_process	0.257336	2	3	CROT;SLC25A17
GO:0060982	coronary artery morphogenesis	biological_process	0.257336	2	3	ARID2;NRP1
GO:0048485	sympathetic nervous system development	biological_process	0.257336	2	3	NF1;NRP1
GO:0071933	Arp2/3 complex binding	molecular_function	0.257336	2	3	SNX9;WHAMM
GO:0097422	tubular endosome	cellular_component	0.257336	2	3	SNX5;VPS26A
GO:0048873	homeostasis of number of cells within a tissue	biological_process	0.257336	2	3	ADD1;AKT3
GO:0070940	dephosphorylation of RNA polymerase II C-terminal domain	biological_process	0.257336	2	3	RPRD1A;RPRD1B
GO:0043303	mast cell degranulation	biological_process	0.257336	2	3	KIT;NR4A3
GO:0006687	glycosphingolipid metabolic process	biological_process	0.257336	2	3	CREM;KIT
GO:0006108	malate metabolic process	biological_process	0.257336	2	3	ME1;ME2
GO:0000973	posttranscriptional tethering of RNA polymerase II gene DNA at nuclear periphery	biological_process	0.257336	2	3	ENSSSCG00000000486;NUP98
GO:0006855	drug transmembrane transport	biological_process	0.257336	2	3	ABCC1;CH242-113D13.1
GO:0006986	response to unfolded protein	biological_process	0.257336	2	3	ERP44;STT3B
GO:0089700	protein kinase D signaling	biological_process	0.257336	2	3	PRKD2;PRKD3
GO:0060052	neurofilament cytoskeleton organization	biological_process	0.257336	2	3	ENSSSCG00000017986;ENSSSCG00000024527
GO:0005875	microtubule associated complex	cellular_component	0.257336	2	3	KIF1B;PAFAH1B1
GO:0015693	magnesium ion transport	biological_process	0.257336	2	3	SLC41A1;TUSC3
GO:0010882	regulation of cardiac muscle contraction by calcium ion signaling	biological_process	0.257336	2	3	ANK2;RYR2
GO:0060444	branching involved in mammary gland duct morphogenesis	biological_process	0.257336	2	3	BTRC;KDM5B
GO:0097484	dendrite extension	biological_process	0.257336	2	3	CYFIP2;SLC9A6
GO:0009314	response to radiation	biological_process	0.257336	2	3	KIT;MAP3K20
GO:0048333	mesodermal cell differentiation	biological_process	0.257336	2	3	ITGA2;KDM6A
GO:0007097	nuclear migration	biological_process	0.257336	2	3	MYH10;SYNE2
GO:0034236	protein kinase A catalytic subunit binding	molecular_function	0.257336	2	3	GSK3B;RYR2
GO:0023051	regulation of signaling	biological_process	0.257336	2	3	ENSSSCG00000022486;MVP
GO:0098609	cell-cell adhesion	biological_process	0.257336	2	3	ANXA2;TMOD3
GO:0042276	error-prone translesion synthesis	biological_process	0.257336	2	3	ENSSSCG00000025703;REV1
GO:1900153	positive regulation of nuclear-transcribed mRNA catabolic process, deadenylation-dependent decay	biological_process	0.257336	2	3	CNOT1;CPEB3
GO:0010332	response to gamma radiation	biological_process	0.257336	2	3	ERCC6;PRKDC
GO:0031023	microtubule organizing center organization	biological_process	0.257336	2	3	BCAS3;PAFAH1B1
GO:0034389	lipid particle organization	biological_process	0.257336	2	3	FAF2;RAB3GAP1
GO:1903204	negative regulation of oxidative stress-induced neuron death	biological_process	0.257336	2	3	FBXO7;NR4A3
GO:0071300	cellular response to retinoic acid	biological_process	0.257336	2	3	BRINP3;YAP1
GO:0021680	cerebellar Purkinje cell layer development	biological_process	0.257336	2	3	HSPA5;MYH10
GO:0043123	positive regulation of I-kappaB kinase/NF-kappaB signaling	biological_process	0.258143	7	16	ANKRD17;CFLAR;ENSSSCG00000002003;MAP3K3;NDFIP2;PRKCE;RHOC
GO:0043401	steroid hormone mediated signaling pathway	biological_process	0.258143	7	16	AR;ESR1;NR1H3;NR2C1;NR4A3;PGR;PPARG
GO:0006816	calcium ion transport	biological_process	0.258143	7	16	CACNA2D1;CAMK2D;ENSSSCG00000000555;PKD2;PSEN1;RYR2;TRPM7
GO:0051091	positive regulation of sequence-specific DNA binding transcription factor activity	biological_process	0.258143	7	16	EP300;KDM1A;KIT;MBTPS2;PPARG;PRKD2;STK3
GO:0001650	fibrillar center	cellular_component	0.259847	11	27	ACACA;DCAF1;HEATR1;MLLT1;NUAK1;PEX14;PSPC1;RAI14;RPS6KA6;USO1;WDR33
GO:0045121	membrane raft	cellular_component	0.274384	8	19	ANXA2;DLG1;ENSSSCG00000022486;NPC1;NPHS2;SLC6A4;STOML3;TRPC4
GO:0018108	peptidyl-tyrosine phosphorylation	biological_process	0.274384	8	19	BAZ1B;ENSSSCG00000016160;IGF1R;JAK2;JAK3;KIT;MELK;WEE1
GO:0005089	Rho guanyl-nucleotide exchange factor activity	molecular_function	0.274384	8	19	ARHGEF12;ARHGEF2;ENSSSCG00000004065;ENSSSCG00000009551;ENSSSCG00000021656;FGD6;SOS2;TIAM1
GO:0008134	transcription factor binding	molecular_function	0.283844	20	53	ADD1;APBB2;AR;BCAS3;CDK13;CREBBP;EP300;GTF2F1;HDAC2;HTT;KDM1A;MDFIC;NCOA1;PARP1;PPARG;PRKDC;RB1;RBL1;RNF4;SMAD2
GO:0001947	heart looping	biological_process	0.285252	5	11	AHI1;C2CD3;IFT52;MIB1;PKD2
GO:0007229	integrin-mediated signaling pathway	biological_process	0.285252	5	11	FUT8;ITGA2;ITGA5;ITGAV;PTK2
GO:0045211	postsynaptic membrane	cellular_component	0.285252	5	11	ATAD1;CADPS2;DLG1;DNAJA3;GPHN
GO:0000082	G1/S transition of mitotic cell cycle	biological_process	0.285252	5	11	ACVR1;CAMK2D;ENSSSCG00000013533;ENSSSCG00000023884;RB1
GO:0000976	transcription regulatory region sequence-specific DNA binding	molecular_function	0.285252	5	11	JMJD1C;KDM3A;MKL1;PRDM5;PSPC1
GO:0017056	structural constituent of nuclear pore	molecular_function	0.285252	5	11	ENSSSCG00000000486;NUP188;NUP214;NUP85;NUP98
GO:0007169	transmembrane receptor protein tyrosine kinase signaling pathway	biological_process	0.285252	5	11	AHI1;ENSSSCG00000016160;IGF1R;JAK3;KIT
GO:0006405	RNA export from nucleus	biological_process	0.285252	5	11	ENSSSCG00000013533;ENSSSCG00000023884;NUP188;NUP214;NUP98
GO:0001707	mesoderm formation	biological_process	0.285252	5	11	ACVR1;GPI;NR4A3;SMAD2;WLS
GO:0017137	Rab GTPase binding	molecular_function	0.286162	14	36	ANKFY1;AP1G1;ENSSSCG00000006901;MYO5A;RAB3GAP1;RAB3GAP2;RIC1;SLC6A4;TBC1D14;TBC1D22A;TBC1D8;TBC1D8B;USP6NL;YIPF1
GO:0010629	negative regulation of gene expression	biological_process	0.287561	9	22	ACACB;INPPL1;NDFIP2;PGR;PPARG;RB1;RBL1;SMAD2;SNX12
GO:0045296	cadherin binding	molecular_function	0.296976	23	62	ADD1;ARFIP1;DLG1;DOCK9;ENO1;ENSSSCG00000008250;ENSSSCG00000008254;EPB41L1;EPS15;ERC1;HSPA5;KIF5B;KTN1;MACF1;MYH9;PI4KA;PKN2;PSEN1;SNX5;SNX9;SPTAN1;TRPC4;USO1
GO:0005829	cytosol	cellular_component	0.300641	196	573	ACACA;ACO1;ADK;AFDN;AGO4;ALDH18A1;ALDH7A1;AMBRA1;ANKFY1;ANKS1A;ANXA2;AOX1;AP1AR;AP1G1;ARFGAP3;ARFGEF2;ARFIP1;ARL6;BRAF;CABLES1;CAPN7;CARMIL1;CASK;CCDC6;CD44;CDC14A;CDK13;CDK14;CHD1L;CLCN5;CNOT1;COL4A3BP;CSNK1A1L;CTSH;DAAM1;DCAF13;DCAF17;DDI2;DENND2A;DENND4C;DNAJA3;DNAJC13;DOCK5;DPP8;EFTUD2;ENAH;ENSSSCG00000002003;ENSSSCG00000007080;ENSSSCG00000007826;ENSSSCG00000009241;ENSSSCG00000014828;ENSSSCG0…
GO:0001649	osteoblast differentiation	biological_process	0.305863	6	14	DDX21;DNAJC13;H3F3A;HIRA;NF1;VCAN
GO:0003707	steroid hormone receptor activity	molecular_function	0.305863	6	14	ESR1;NR1H3;NR2C1;NR4A3;PGR;PPARG
GO:0030308	negative regulation of cell growth	biological_process	0.305863	6	14	APBB2;ENO1;OSGIN2;SERPINE2;SMAD4;ST7L
GO:0005923	bicellular tight junction	cellular_component	0.305863	6	14	ANK3;DLG1;MAGI1;MARVELD2;PARD3;RAPGEF2
GO:0042733	embryonic digit morphogenesis	biological_process	0.305863	6	14	C2CD3;FBXW4;IFT52;MAP3K20;SMAD4;TBC1D32
GO:0019903	protein phosphatase binding	molecular_function	0.305863	6	14	ANAPC7;HSP90B1;JAK3;MVP;PPP6R3;STX17
GO:0045177	apical part of cell	cellular_component	0.305863	6	14	ACVR1;AFDN;CLCN5;FZD3;HOMER2;NUMA1
GO:0019221	cytokine-mediated signaling pathway	biological_process	0.305863	6	14	CD44;IL1R1;IL4R;IL6ST;JAK2;KIT
GO:0016757	transferase activity, transferring glycosyl groups	molecular_function	0.315809	12	31	ALG6;B3GLCT;ENSSSCG00000015341;FUT8;GALNT11;GALNT2;MGAT4A;MGAT5;PARP1;PARP11;PPAT;TNKS2
GO:0005080	protein kinase C binding	molecular_function	0.316766	3	6	DSP;ITGAV;TOP2A
GO:0030501	positive regulation of bone mineralization	biological_process	0.316766	3	6	ACVR1;BMPR1B;FBN2
GO:0072520	seminiferous tubule development	biological_process	0.316766	3	6	AR;ATRX;SMAD4
GO:2000786	positive regulation of autophagosome assembly	biological_process	0.316766	3	6	RAB3GAP1;RAB3GAP2;SH3GLB1
GO:0045930	negative regulation of mitotic cell cycle	biological_process	0.316766	3	6	BRINP3;DLG1;RB1
GO:0004896	cytokine receptor activity	molecular_function	0.316766	3	6	CD44;IL4R;IL6ST
GO:0032868	response to insulin	biological_process	0.316766	3	6	HADHA;INPPL1;SCAP
GO:0001658	branching involved in ureteric bud morphogenesis	biological_process	0.316766	3	6	DLG1;PKD2;SMAD4
GO:0004697	protein kinase C activity	molecular_function	0.316766	3	6	PRKCE;PRKD2;PRKD3
GO:0005881	cytoplasmic microtubule	cellular_component	0.316766	3	6	BCAS3;ENSSSCG00000027791;SS18
GO:0097067	cellular response to thyroid hormone stimulus	biological_process	0.316766	3	6	CTSH;CTSS;KIT
GO:0030521	androgen receptor signaling pathway	biological_process	0.316766	3	6	AR;KDM3A;MED14
GO:0043296	apical junction complex	cellular_component	0.316766	3	6	AFDN;NECTIN3;PKN2
GO:0071773	cellular response to BMP stimulus	biological_process	0.316766	3	6	ACVR1;ADAMTS7;BMPR1B
GO:0050839	cell adhesion molecule binding	molecular_function	0.316766	3	6	AFDN;DSP;NECTIN3
GO:0001937	negative regulation of endothelial cell proliferation	biological_process	0.316766	3	6	KRIT1;NF1;THBS1
GO:0007265	Ras protein signal transduction	biological_process	0.316766	3	6	NF1;RB1;SDCBP
GO:0051289	protein homotetramerization	biological_process	0.316766	3	6	ACACA;ACACB;GLS
GO:0021762	substantia nigra development	biological_process	0.316766	3	6	HSPA5;MAOB;YWHAQ
GO:0007004	telomere maintenance via telomerase	biological_process	0.316766	3	6	ENSSSCG00000017826;PTGES3;SMG5
GO:0042327	positive regulation of phosphorylation	biological_process	0.316766	3	6	AR;MOB1B;THBS1
GO:0004714	transmembrane receptor protein tyrosine kinase activity	molecular_function	0.316766	3	6	ENSSSCG00000016160;IGF1R;KIT
GO:0010800	positive regulation of peptidyl-threonine phosphorylation	biological_process	0.316766	3	6	GSK3B;MAPK1;UBE2K
GO:0060291	long-term synaptic potentiation	biological_process	0.316766	3	6	BRAF;MAPK1;SERPINE2
GO:0004675	transmembrane receptor protein serine/threonine kinase activity	molecular_function	0.316766	3	6	ACVR1;BMPR1B;TGFBR1
GO:0045785	positive regulation of cell adhesion	biological_process	0.316766	3	6	ITGAV;PRKCA;PRKD2
GO:0071310	cellular response to organic substance	biological_process	0.316766	3	6	MAPK1;MAPK8;SLC6A4
GO:0048786	presynaptic active zone	cellular_component	0.316766	3	6	ENSSSCG00000006045;ERC1;FZD3
GO:0008143	polyA binding	molecular_function	0.316766	3	6	LARP4;PABPC1;RBPMS
GO:0006998	nuclear envelope organization	biological_process	0.316766	3	6	PARP11;SUN2;SYNE2
GO:0051897	positive regulation of protein kinase B signaling	biological_process	0.316766	3	6	RICTOR;STK3;THBS1
GO:0005905	clathrin-coated pit	cellular_component	0.316766	3	6	EPS15;INPP5F;TFRC
GO:2000114	regulation of establishment of cell polarity	biological_process	0.316766	3	6	BCAS3;KRIT1;RICTOR
GO:0051145	smooth muscle cell differentiation	biological_process	0.316766	3	6	ACVR1;ENSSSCG00000023626;MKL1
GO:0045648	positive regulation of erythrocyte differentiation	biological_process	0.316766	3	6	FOXO3;KDM1A;SMAP1
GO:0072562	blood microparticle	cellular_component	0.316766	3	6	ACTG1;INTS11;TFRC
GO:0032041	NAD-dependent histone deacetylase activity(H3-K14 specific))	molecular_function	0.316766	1	6	HDAC2
GO:0035329	hippo signaling	biological_process	0.316766	3	6	MOB1B;STK3;YAP1
GO:0003899	DNA-directed 5'-3' RNA polymerase activity	molecular_function	0.316766	3	6	ENSSSCG00000000169;ENSSSCG00000001493;POLR1A
GO:0001772	immunological synapse	cellular_component	0.316766	3	6	DLG1;MYH9;SNX27
GO:0090575	RNA polymerase II transcription factor complex	cellular_component	0.316766	3	6	NR1H3;PPARG;SMAD4
GO:0007411	axon guidance	biological_process	0.321218	7	17	APBB2;ENSSSCG00000012001;KIF5B;MYH10;NR4A3;NRP1;SMAD4
GO:0004175	endopeptidase activity	molecular_function	0.321218	7	17	ADAM10;CAPN7;CTSH;ENSSSCG00000011779;PAPPA;PSEN1;SENP2
GO:0001525	angiogenesis	biological_process	0.321218	7	17	ANXA2;ENSSSCG00000001695;ITGAV;MYH9;NRP1;PRKX;SETD2
GO:0050660	flavin adenine dinucleotide binding	molecular_function	0.321218	7	17	ACADM;AOX1;COQ6;ENSSSCG00000015844;ETFA;KDM1A;MTO1
GO:0003713	transcription coactivator activity	molecular_function	0.322786	13	34	CREBBP;EP300;MED14;MED27;MKL1;NCOA1;NCOA3;NCOA6;RBPMS;SAP130;SS18;TADA2A;YAP1
GO:0097692	histone H3-K4 monomethylation	NA	0.331944	1	1	RLF
GO:0050709	negative regulation of protein secretion	biological_process	0.331944	1	1	SERGEF
GO:0035767	endothelial cell chemotaxis	biological_process	0.331944	1	1	NRP1
GO:0097202	activation of cysteine-type endopeptidase activity	biological_process	0.331944	1	1	CYFIP2
GO:0006537	glutamate biosynthetic process	biological_process	0.331944	1	1	GLS
GO:0042304	regulation of fatty acid biosynthetic process	biological_process	0.331944	1	1	SCAP
GO:0021675	nerve development	biological_process	0.331944	1	1	NRP1
GO:0060242	contact inhibition	biological_process	0.331944	1	1	YAP1
GO:0035212	cell competition in a multicellular organism	biological_process	0.331944	1	1	DCAF1
GO:0097676	histone H3-K36 dimethylation	biological_process	0.331944	1	1	SETD2
GO:0051959	dynein light intermediate chain binding	molecular_function	0.331944	1	1	CCDC88C
GO:0010587	miRNA catabolic process	biological_process	0.331944	1	1	ENSSSCG00000022177
GO:0004931	extracellular ATP-gated cation channel activity	molecular_function	0.331944	1	1	P2RX6
GO:2000641	regulation of early endosome to late endosome transport	biological_process	0.331944	1	1	DNAJC13
GO:0003231	cardiac ventricle development	biological_process	0.331944	1	1	TMEM65
GO:0048102	autophagic cell death	biological_process	0.331944	1	1	SH3GLB1
GO:0039008	pronephric nephron tubule morphogenesis	biological_process	0.331944	1	1	AHI1
GO:0035102	PRC1 complex	cellular_component	0.331944	1	1	PHC3
GO:0043969	histone H2B acetylation	biological_process	0.331944	1	1	EP300
GO:0016560	protein import into peroxisome matrix, docking	biological_process	0.331944	1	1	PEX14
GO:0007260	tyrosine phosphorylation of STAT protein	biological_process	0.331944	1	1	JAK3
GO:0060401	cytosolic calcium ion transport	biological_process	0.331944	1	1	RYR2
GO:0034186	apolipoprotein A-I binding	molecular_function	0.331944	1	1	SCARB1
GO:0007044	cell-substrate junction assembly	biological_process	0.331944	1	1	ITGA5
GO:0045309	protein phosphorylated amino acid binding	molecular_function	0.331944	1	1	BTRC
GO:0097637	integral component of autophagosome membrane	cellular_component	0.331944	1	1	LAMP2
GO:0030593	neutrophil chemotaxis	biological_process	0.331944	1	1	GBF1
GO:0004534	5'-3' exoribonuclease activity	molecular_function	0.331944	1	1	XRN2
GO:0048570	notochord morphogenesis	biological_process	0.331944	1	1	KDM6A
GO:0034602	oxoglutarate dehydrogenase(NAD+ activity))	molecular_function	0.331944	1	1	OGDH
GO:0040019	positive regulation of embryonic development	biological_process	0.331944	1	1	PAFAH1B1
GO:1990429	peroxisomal importomer complex	cellular_component	0.331944	1	1	PEX14
GO:1904754	positive regulation of vascular associated smooth muscle cell migration	NA	0.331944	1	1	DOCK5
GO:0071361	cellular response to ethanol	biological_process	0.331944	1	1	PRKCE
GO:0034116	positive regulation of heterotypic cell-cell adhesion	biological_process	0.331944	1	1	CD44
GO:1902946	protein localization to early endosome	biological_process	0.331944	1	1	NRP1
GO:0006850	mitochondrial pyruvate transport	biological_process	0.331944	1	1	MPC2
GO:0016715	oxidoreductase activity, acting on paired donors, with incorporation or reduction of molecular oxygen, reduced ascorbate as one donor, and incorporation of one atom of oxygen	molecular_function	0.331944	1	1	PAM
GO:0042490	mechanoreceptor differentiation	biological_process	0.331944	1	1	MYO7A
GO:1901303	negative regulation of cargo loading into COPII-coated vesicle	biological_process	0.331944	1	1	INSIG1
GO:0031999	negative regulation of fatty acid beta-oxidation	biological_process	0.331944	1	1	ACACB
GO:0070736	protein-glycine ligase activity, initiating	molecular_function	0.331944	1	1	ENSSSCG00000011553
GO:0048680	positive regulation of axon regeneration	biological_process	0.331944	1	1	BRAF
GO:1901679	nucleotide transmembrane transport	biological_process	0.331944	1	1	SLC25A17
GO:0008635	activation of cysteine-type endopeptidase activity involved in apoptotic process by cytochrome c	biological_process	0.331944	1	1	ENSSSCG00000000884
GO:0006086	acetyl-CoA biosynthetic process from pyruvate	biological_process	0.331944	1	1	OLFML3
GO:0045056	transcytosis	biological_process	0.331944	1	1	USO1
GO:0060544	regulation of necroptotic process	biological_process	0.331944	1	1	CFLAR
GO:0051643	endoplasmic reticulum localization	biological_process	0.331944	1	1	MYO5A
GO:0019240	citrulline biosynthetic process	biological_process	0.331944	1	1	ALDH18A1
GO:0006175	dATP biosynthetic process	biological_process	0.331944	1	1	ADK
GO:0048012	hepatocyte growth factor receptor signaling pathway	biological_process	0.331944	1	1	NRP1
GO:1901897	regulation of relaxation of cardiac muscle	biological_process	0.331944	1	1	CAMK2D
GO:1903849	positive regulation of aorta morphogenesis	NA	0.331944	1	1	EFNB2
GO:0032387	negative regulation of intracellular transport	biological_process	0.331944	1	1	MAP1B
GO:0098592	cytoplasmic side of apical plasma membrane	cellular_component	0.331944	1	1	EXOC1
GO:0032027	myosin light chain binding	molecular_function	0.331944	1	1	SPATA6
GO:0006269	DNA replication, synthesis of RNA primer	biological_process	0.331944	1	1	ENSSSCG00000001493
GO:1990430	extracellular matrix protein binding	molecular_function	0.331944	1	1	ITGAV
GO:0010460	positive regulation of heart rate	biological_process	0.331944	1	1	RYR2
GO:0098664	G-protein coupled serotonin receptor signaling pathway	NA	0.331944	1	1	HTR4
GO:0050794	regulation of cellular process	biological_process	0.331944	1	1	WNK1
GO:1902336	positive regulation of retinal ganglion cell axon guidance	biological_process	0.331944	1	1	NRP1
GO:0003906	DNA-apurinic or apyrimidinic site lyase activity	molecular_function	0.331944	1	1	APLF
GO:0071144	SMAD2-SMAD3 protein complex	cellular_component	0.331944	1	1	SMAD2
GO:0060219	camera-type eye photoreceptor cell differentiation	biological_process	0.331944	1	1	SDK2
GO:0055015	ventricular cardiac muscle cell development	biological_process	0.331944	1	1	MYH10
GO:0019226	transmission of nerve impulse	biological_process	0.331944	1	1	PAFAH1B1
GO:0046293	formaldehyde biosynthetic process	biological_process	0.331944	1	1	KDM3A
GO:0045103	intermediate filament-based process	biological_process	0.331944	1	1	VIM
GO:0085029	extracellular matrix assembly	biological_process	0.331944	1	1	SHAS2
GO:0002360	T cell lineage commitment	biological_process	0.331944	1	1	PRKDC
GO:0050863	regulation of T cell activation	biological_process	0.331944	1	1	RC3H1
GO:1902533	positive regulation of intracellular signal transduction	biological_process	0.331944	1	1	PRKD2
GO:0016340	calcium-dependent cell-matrix adhesion	biological_process	0.331944	1	1	TRPM7
GO:0035650	AP-1 adaptor complex binding	molecular_function	0.331944	1	1	AP1AR
GO:0030903	notochord development	biological_process	0.331944	1	1	YAP1
GO:0030889	negative regulation of B cell proliferation	biological_process	0.331944	1	1	RC3H1
GO:0003951	NAD+ kinase activity	molecular_function	0.331944	1	1	NADK2
GO:0015910	peroxisomal long-chain fatty acid import	biological_process	0.331944	1	1	ABCD3
GO:0010828	positive regulation of glucose transport	biological_process	0.331944	1	1	NR4A3
GO:0035336	long-chain fatty-acyl-CoA metabolic process	biological_process	0.331944	1	1	FAR1
GO:0030953	astral microtubule organization	biological_process	0.331944	1	1	DLG1
GO:2000391	positive regulation of neutrophil extravasation	biological_process	0.331944	1	1	IL1R1
GO:0044610	FMN transmembrane transporter activity	molecular_function	0.331944	1	1	SLC25A17
GO:0048875	chemical homeostasis within a tissue	biological_process	0.331944	1	1	HOMER2
GO:0035844	cloaca development	biological_process	0.331944	1	1	AHI1
GO:0097326	melanocyte adhesion	biological_process	0.331944	1	1	KIT
GO:0097224	sperm connecting piece	cellular_component	0.331944	1	1	SPATA6
GO:0035065	regulation of histone acetylation	biological_process	0.331944	1	1	TADA2A
GO:0048311	mitochondrion distribution	biological_process	0.331944	1	1	MTM1
GO:0015917	aminophospholipid transport	biological_process	0.331944	1	1	ABCA7
GO:0097001	ceramide binding	molecular_function	0.331944	1	1	COL4A3BP
GO:0006475	internal protein amino acid acetylation	biological_process	0.331944	1	1	EP300
GO:0036402	proteasome-activating ATPase activity	molecular_function	0.331944	1	1	PSMC6
GO:0097414	classical Lewy body	cellular_component	0.331944	1	1	FBXO7
GO:0086002	cardiac muscle cell action potential involved in contraction	biological_process	0.331944	1	1	CACNA2D1
GO:0010837	regulation of keratinocyte proliferation	biological_process	0.331944	1	1	YAP1
GO:0002544	chronic inflammatory response	biological_process	0.331944	1	1	THBS1
GO:0044727	DNA demethylation of male pronucleus	biological_process	0.331944	1	1	TET3
GO:0016062	adaptation of rhodopsin mediated signaling	biological_process	0.331944	1	1	RDH11
GO:0010764	negative regulation of fibroblast migration	biological_process	0.331944	1	1	BRAF
GO:0033631	cell-cell adhesion mediated by integrin	biological_process	0.331944	1	1	ITGA5
GO:0061599	molybdopterin molybdotransferase activity	molecular_function	0.331944	1	1	GPHN
GO:0050930	induction of positive chemotaxis	biological_process	0.331944	1	1	ENSSSCG00000001695
GO:0042759	long-chain fatty acid biosynthetic process	biological_process	0.331944	1	1	MYO5A
GO:0045899	positive regulation of RNA polymerase II transcriptional preinitiation complex assembly	biological_process	0.331944	1	1	PSMC6
GO:0004781	sulfate adenylyltransferase(ATP activity)	molecular_function	0.331944	1	1	PAPSS2
GO:0038064	collagen receptor activity	molecular_function	0.331944	1	1	ITGA2
GO:0015081	sodium ion transmembrane transporter activity	molecular_function	0.331944	1	1	SLC23A1
GO:0071884	vitamin D receptor activator activity	molecular_function	0.331944	1	1	BAZ1B
GO:0033206	meiotic cytokinesis	biological_process	0.331944	1	1	ACTR3
GO:0071894	histone H2B conserved C-terminal lysine ubiquitination	biological_process	0.331944	1	1	WAC
GO:0048563	post-embryonic animal organ morphogenesis	biological_process	0.331944	1	1	MYO7A
GO:0090222	centrosome-templated microtubule nucleation	biological_process	0.331944	1	1	NIN
GO:0019981	interleukin-6 binding	molecular_function	0.331944	1	1	IL6ST
GO:0008356	asymmetric cell division	biological_process	0.331944	1	1	ACTR3
GO:0033363	secretory granule organization	biological_process	0.331944	1	1	SERPINE2
GO:0045793	positive regulation of cell size	biological_process	0.331944	1	1	AKT3
GO:0002635	negative regulation of germinal center formation	biological_process	0.331944	1	1	RC3H1
GO:0035631	CD40 receptor complex	cellular_component	0.331944	1	1	ENSSSCG00000002003
GO:0090280	positive regulation of calcium ion import	biological_process	0.331944	1	1	CASK
GO:0001667	ameboidal-type cell migration	biological_process	0.331944	1	1	PAFAH1B1
GO:0004677	DNA-dependent protein kinase activity	molecular_function	0.331944	1	1	PRKDC
GO:0043947	positive regulation by host of symbiont catalytic activity	biological_process	0.331944	1	1	SUGT1
GO:0022892	substrate-specific transporter activity	molecular_function	0.331944	1	1	SLC41A1
GO:0004362	glutathione-disulfide reductase activity	molecular_function	0.331944	1	1	ENSSSCG00000015844
GO:0008611	ether lipid biosynthetic process	biological_process	0.331944	1	1	FAR1
GO:0090197	positive regulation of chemokine secretion	biological_process	0.331944	1	1	IL4R
GO:1900271	regulation of long-term synaptic potentiation	biological_process	0.331944	1	1	NF1
GO:0070735	protein-glycine ligase activity	molecular_function	0.331944	1	1	ENSSSCG00000011553
GO:1904251	regulation of bile acid metabolic process	NA	0.331944	1	1	PANK2
GO:0048663	neuron fate commitment	biological_process	0.331944	1	1	SMAD4
GO:0008559	xenobiotic-transporting ATPase activity	molecular_function	0.331944	1	1	ABCC1
GO:0051151	negative regulation of smooth muscle cell differentiation	biological_process	0.331944	1	1	ANKRD17
GO:0043548	phosphatidylinositol 3-kinase binding	molecular_function	0.331944	1	1	IGF1R
GO:0021549	cerebellum development	biological_process	0.331944	1	1	ATRN
GO:0043570	maintenance of DNA repeat elements	biological_process	0.331944	1	1	MSH3
GO:0033554	cellular response to stress	biological_process	0.331944	1	1	ENSSSCG00000009898
GO:2001295	malonyl-CoA biosynthetic process	biological_process	0.331944	1	1	ACACB
GO:0009229	thiamine diphosphate biosynthetic process	biological_process	0.331944	1	1	TPK1
GO:0043679	axon terminus	cellular_component	0.331944	1	1	SLC9A6
GO:0042698	ovulation cycle	biological_process	0.331944	1	1	BMPR1B
GO:0031204	posttranslational protein targeting to membrane, translocation	biological_process	0.331944	1	1	SEC63
GO:0048679	regulation of axon regeneration	biological_process	0.331944	1	1	BRAF
GO:0000768	syncytium formation by plasma membrane fusion	biological_process	0.331944	1	1	VASH2
GO:0045685	regulation of glial cell differentiation	biological_process	0.331944	1	1	NF1
GO:0003050	regulation of systemic arterial blood pressure by atrial natriuretic peptide	biological_process	0.331944	1	1	CORIN
GO:0048678	response to axon injury	biological_process	0.331944	1	1	ENSSSCG00000021111
GO:0005247	voltage-gated chloride channel activity	molecular_function	0.331944	1	1	CLCN5
GO:0021637	trigeminal nerve structural organization	biological_process	0.331944	1	1	NRP1
GO:0007342	fusion of sperm to egg plasma membrane	biological_process	0.331944	1	1	SPACA6
GO:0022617	extracellular matrix disassembly	biological_process	0.331944	1	1	SH3PXD2B
GO:0031430	M band	cellular_component	0.331944	1	1	PPP2R5A
GO:0048845	venous blood vessel morphogenesis	biological_process	0.331944	1	1	EFNB2
GO:0035166	post-embryonic hemopoiesis	biological_process	0.331944	1	1	MYO1E
GO:0004921	interleukin-11 receptor activity	molecular_function	0.331944	1	1	IL6ST
GO:0051294	establishment of spindle orientation	biological_process	0.331944	1	1	SPAG5
GO:1990876	cytoplasmic side of nuclear pore	NA	0.331944	1	1	NUP214
GO:0061534	gamma-aminobutyric acid secretion, neurotransmission	biological_process	0.331944	1	1	NF1
GO:0036250	peroxisome transport along microtubule	biological_process	0.331944	1	1	PEX14
GO:0038162	erythropoietin-mediated signaling pathway	biological_process	0.331944	1	1	KIT
GO:0036396	MIS complex	cellular_component	0.331944	1	1	KIAA1429
GO:0051967	negative regulation of synaptic transmission, glutamatergic	biological_process	0.331944	1	1	ATAD1
GO:0032926	negative regulation of activin receptor signaling pathway	biological_process	0.331944	1	1	ACVR1
GO:0031394	positive regulation of prostaglandin biosynthetic process	biological_process	0.331944	1	1	PPARG
GO:0032181	dinucleotide repeat insertion binding	molecular_function	0.331944	1	1	MSH3
GO:0004594	pantothenate kinase activity	molecular_function	0.331944	1	1	PANK2
GO:0035094	response to nicotine	biological_process	0.331944	1	1	MAPK1
GO:0006266	DNA ligation	biological_process	0.331944	1	1	TOP2A
GO:0022414	reproductive process	biological_process	0.331944	1	1	ANTXR2
GO:0035620	ceramide transporter activity	molecular_function	0.331944	1	1	COL4A3BP
GO:0008504	monoamine transmembrane transporter activity	molecular_function	0.331944	1	1	SLC6A4
GO:0005093	Rab GDP-dissociation inhibitor activity	molecular_function	0.331944	1	1	GDI2
GO:0046909	intermembrane transport	biological_process	0.331944	1	1	ARL6
GO:1990380	Lys48-specific deubiquitinase activity	molecular_function	0.331944	1	1	MINDY3
GO:1903764	regulation of potassium ion export across plasma membrane	NA	0.331944	1	1	DLG1
GO:0097409	glial cytoplasmic inclusion	cellular_component	0.331944	1	1	FBXO7
GO:0021897	forebrain astrocyte development	biological_process	0.331944	1	1	NF1
GO:0048169	regulation of long-term neuronal synaptic plasticity	biological_process	0.331944	1	1	NF1
GO:0033268	node of Ranvier	cellular_component	0.331944	1	1	DLG1
GO:0004133	glycogen debranching enzyme activity	molecular_function	0.331944	1	1	AGL
GO:0008520	L-ascorbate:sodium symporter activity	molecular_function	0.331944	1	1	SLC23A1
GO:0072075	metanephric mesenchyme development	biological_process	0.331944	1	1	PKD2
GO:0034666	integrin alpha2-beta1 complex	cellular_component	0.331944	1	1	ITGA2
GO:0005849	mRNA cleavage factor complex	cellular_component	0.331944	1	1	PCF11
GO:0035722	interleukin-12-mediated signaling pathway	biological_process	0.331944	1	1	JAK2
GO:0000235	astral microtubule	cellular_component	0.331944	1	1	PAFAH1B1
GO:0000988	transcription factor activity, protein binding	molecular_function	0.331944	1	1	SMAD4
GO:1990614	mitochondrial magnesium ion transmembrane transport	NA	0.331944	1	1	MRS2
GO:0014043	negative regulation of neuron maturation	biological_process	0.331944	1	1	GSK3B
GO:0004897	ciliary neurotrophic factor receptor activity	molecular_function	0.331944	1	1	IL6ST
GO:0043652	engulfment of apoptotic cell	biological_process	0.331944	1	1	THBS1
GO:0002934	desmosome organization	biological_process	0.331944	1	1	DSP
GO:0021649	vestibulocochlear nerve structural organization	biological_process	0.331944	1	1	NRP1
GO:0038092	nodal signaling pathway	biological_process	0.331944	1	1	SMAD2
GO:0097286	iron ion import	biological_process	0.331944	1	1	TFRC
GO:0003724	RNA helicase activity	molecular_function	0.331944	1	1	SKIV2L2
GO:0060693	regulation of branching involved in salivary gland morphogenesis	biological_process	0.331944	1	1	BTBD7
GO:0045715	negative regulation of low-density lipoprotein particle receptor biosynthetic process	biological_process	0.331944	1	1	ITGAV
GO:0040037	negative regulation of fibroblast growth factor receptor signaling pathway	biological_process	0.331944	1	1	THBS1
GO:0021636	trigeminal nerve morphogenesis	biological_process	0.331944	1	1	NRP1
GO:0060421	positive regulation of heart growth	biological_process	0.331944	1	1	ACACB
GO:0034713	type I transforming growth factor beta receptor binding	molecular_function	0.331944	1	1	SMAD2
GO:0070106	interleukin-27-mediated signaling pathway	biological_process	0.331944	1	1	IL6ST
GO:0060627	regulation of vesicle-mediated transport	biological_process	0.331944	1	1	UVRAG
GO:0016064	immunoglobulin mediated immune response	biological_process	0.331944	1	1	IL4R
GO:0001846	opsonin binding	molecular_function	0.331944	1	1	ITGAV
GO:0015186	L-glutamine transmembrane transporter activity	molecular_function	0.331944	1	1	SLC38A1
GO:0010886	positive regulation of cholesterol storage	biological_process	0.331944	1	1	SCARB1
GO:0032204	regulation of telomere maintenance	biological_process	0.331944	1	1	SMG5
GO:0042628	mating plug formation	biological_process	0.331944	1	1	SERPINE2
GO:0030553	cGMP binding	molecular_function	0.331944	1	1	PRKG1
GO:0018094	protein polyglycylation	biological_process	0.331944	1	1	ENSSSCG00000011553
GO:0071376	cellular response to corticotropin-releasing hormone stimulus	biological_process	0.331944	1	1	NR4A3
GO:0044088	regulation of vacuole organization	biological_process	0.331944	1	1	MTM1
GO:0038085	vascular endothelial growth factor binding	molecular_function	0.331944	1	1	NRP1
GO:0033278	cell proliferation in midbrain	biological_process	0.331944	1	1	FZD3
GO:0061445	endocardial cushion cell fate commitment	biological_process	0.331944	1	1	ACVR1
GO:0061034	olfactory bulb mitral cell layer development	biological_process	0.331944	1	1	OGDH
GO:0071787	endoplasmic reticulum tubular network assembly	biological_process	0.331944	1	1	ZFYVE27
GO:0060977	coronary vasculature morphogenesis	biological_process	0.331944	1	1	SETD2
GO:0030108	HLA-A specific activating MHC class I receptor activity	molecular_function	0.331944	1	1	CTSH
GO:0008374	O-acyltransferase activity	molecular_function	0.331944	1	1	SOAT1
GO:0071709	membrane assembly	biological_process	0.331944	1	1	ANK3
GO:0051724	NAD transporter activity	molecular_function	0.331944	1	1	SLC25A17
GO:0034383	low-density lipoprotein particle clearance	biological_process	0.331944	1	1	SCARB1
GO:0015616	DNA translocase activity	molecular_function	0.331944	1	1	ATRX
GO:0010820	positive regulation of T cell chemotaxis	biological_process	0.331944	1	1	ADAM10
GO:0090306	spindle assembly involved in meiosis	biological_process	0.331944	1	1	MASTL
GO:1903286	regulation of potassium ion import	biological_process	0.331944	1	1	DLG1
GO:0086057	voltage-gated calcium channel activity involved in bundle of His cell action potential	molecular_function	0.331944	1	1	CACNA2D1
GO:0000075	cell cycle checkpoint	biological_process	0.331944	1	1	MAP3K20
GO:0021612	facial nerve structural organization	biological_process	0.331944	1	1	NRP1
GO:0034435	cholesterol esterification	biological_process	0.331944	1	1	SOAT1
GO:0032695	negative regulation of interleukin-12 production	biological_process	0.331944	1	1	THBS1
GO:0090500	endocardial cushion to mesenchymal transition	biological_process	0.331944	1	1	SHAS2
GO:1901492	positive regulation of lymphangiogenesis	biological_process	0.331944	1	1	CCBE1
GO:0046602	regulation of mitotic centrosome separation	biological_process	0.331944	1	1	KIF11
GO:0007290	spermatid nucleus elongation	biological_process	0.331944	1	1	KDM3A
GO:0016509	long-chain-3-hydroxyacyl-CoA dehydrogenase activity	molecular_function	0.331944	1	1	HADHA
GO:0072214	metanephric cortex development	biological_process	0.331944	1	1	PKD2
GO:0048633	positive regulation of skeletal muscle tissue growth	biological_process	0.331944	1	1	MTM1
GO:0045191	regulation of isotype switching	biological_process	0.331944	1	1	APLF
GO:0031088	platelet dense granule membrane	cellular_component	0.331944	1	1	LAMP2
GO:0045445	myoblast differentiation	biological_process	0.331944	1	1	RB1
GO:0036123	histone H3-K9 dimethylation	biological_process	0.331944	1	1	KDM3A
GO:0060267	positive regulation of respiratory burst	biological_process	0.331944	1	1	PTK2
GO:0060599	lateral sprouting involved in mammary gland duct morphogenesis	biological_process	0.331944	1	1	AR
GO:0032836	glomerular basement membrane development	biological_process	0.331944	1	1	MYO1E
GO:0004349	glutamate 5-kinase activity	molecular_function	0.331944	1	1	ALDH18A1
GO:0008355	olfactory learning	biological_process	0.331944	1	1	ADCY3
GO:0034728	nucleosome organization	biological_process	0.331944	1	1	SETD2
GO:0061732	mitochondrial acetyl-CoA biosynthetic process from pyruvate	NA	0.331944	1	1	MPC2
GO:0032432	actin filament bundle	cellular_component	0.331944	1	1	PLS3
GO:0038084	vascular endothelial growth factor signaling pathway	biological_process	0.331944	1	1	NRP1
GO:0030098	lymphocyte differentiation	biological_process	0.331944	1	1	PRKDC
GO:1900740	positive regulation of protein insertion into mitochondrial membrane involved in apoptotic signaling pathway	biological_process	0.331944	1	1	SH3GLB1
GO:0051081	nuclear envelope disassembly	biological_process	0.331944	1	1	PAFAH1B1
GO:0006896	Golgi to vacuole transport	biological_process	0.331944	1	1	ENSSSCG00000027509
GO:0048386	positive regulation of retinoic acid receptor signaling pathway	biological_process	0.331944	1	1	NR2C1
GO:0036089	cleavage furrow formation	biological_process	0.331944	1	1	SNX9
GO:0044337	canonical Wnt signaling pathway involved in positive regulation of apoptotic process	biological_process	0.331944	1	1	GSK3B
GO:0061598	molybdopterin adenylyltransferase activity	molecular_function	0.331944	1	1	GPHN
GO:0001778	plasma membrane repair	biological_process	0.331944	1	1	MYH10
GO:0003923	GPI-anchor transamidase activity	molecular_function	0.331944	1	1	PIGU
GO:0032426	stereocilium tip	cellular_component	0.331944	1	1	HOMER2
GO:0010761	fibroblast migration	biological_process	0.331944	1	1	SYNE2
GO:0006707	cholesterol catabolic process	biological_process	0.331944	1	1	SCARB1
GO:0051088	PMA-inducible membrane protein ectodomain proteolysis	biological_process	0.331944	1	1	ADAM10
GO:0042986	positive regulation of amyloid precursor protein biosynthetic process	biological_process	0.331944	1	1	SOAT1
GO:0034769	basement membrane disassembly	biological_process	0.331944	1	1	CTSS
GO:0015684	ferrous iron transport	biological_process	0.331944	1	1	SLC39A14
GO:0002764	immune response-regulating signaling pathway	biological_process	0.331944	1	1	CTSH
GO:0010698	acetyltransferase activator activity	molecular_function	0.331944	1	1	BCAS3
GO:1990481	mRNA pseudouridine synthesis	biological_process	0.331944	1	1	TRUB1
GO:1903348	positive regulation of bicellular tight junction assembly	biological_process	0.331944	1	1	NPHP1
GO:1990454	L-type voltage-gated calcium channel complex	cellular_component	0.331944	1	1	CACNA2D1
GO:0000015	phosphopyruvate hydratase complex	cellular_component	0.331944	1	1	ENO1
GO:0052833	inositol monophosphate 4-phosphatase activity	molecular_function	0.331944	1	1	INPP5F
GO:0006868	glutamine transport	biological_process	0.331944	1	1	SLC38A1
GO:0032288	myelin assembly	biological_process	0.331944	1	1	MTMR2
GO:0061535	glutamate secretion, neurotransmission	biological_process	0.331944	1	1	NF1
GO:1904835	dorsal root ganglion morphogenesis	NA	0.331944	1	1	NRP1
GO:0010390	histone monoubiquitination	biological_process	0.331944	1	1	WAC
GO:0060685	regulation of prostatic bud formation	biological_process	0.331944	1	1	AR
GO:1905146	lysosomal protein catabolic process	NA	0.331944	1	1	LAMP2
GO:0045837	negative regulation of membrane potential	biological_process	0.331944	1	1	BNIP3
GO:0010813	neuropeptide catabolic process	biological_process	0.331944	1	1	CTSH
GO:0010994	free ubiquitin chain polymerization	biological_process	0.331944	1	1	UBE2K
GO:1904293	negative regulation of ERAD pathway	NA	0.331944	1	1	USP25
GO:0043542	endothelial cell migration	biological_process	0.331944	1	1	PRKX
GO:0008488	gamma-glutamyl carboxylase activity	molecular_function	0.331944	1	1	GGCX
GO:0014886	transition between slow and fast fiber	biological_process	0.331944	1	1	GTF2I
GO:1902361	mitochondrial pyruvate transmembrane transport	biological_process	0.331944	1	1	MPC2
GO:0043247	telomere maintenance in response to DNA damage	biological_process	0.331944	1	1	RIF1
GO:0017127	cholesterol transporter activity	molecular_function	0.331944	1	1	CH242-113D13.1
GO:0014051	gamma-aminobutyric acid secretion	biological_process	0.331944	1	1	TRPC4
GO:0045780	positive regulation of bone resorption	biological_process	0.331944	1	1	TFRC
GO:0030867	rough endoplasmic reticulum membrane	cellular_component	0.331944	1	1	UBA1
GO:0060378	regulation of brood size	biological_process	0.331944	1	1	SH3PXD2B
GO:0035617	stress granule disassembly	biological_process	0.331944	1	1	KIF5B
GO:0004908	interleukin-1 receptor activity	molecular_function	0.331944	1	1	IL1R1
GO:1901187	regulation of ephrin receptor signaling pathway	biological_process	0.331944	1	1	ANKS1A
GO:0051377	mannose-ethanolamine phosphotransferase activity	molecular_function	0.331944	1	1	PIGN
GO:0090341	negative regulation of secretion of lysosomal enzymes	biological_process	0.331944	1	1	NR1H3
GO:0048496	maintenance of animal organ identity	biological_process	0.331944	1	1	IQCB1
GO:0061040	female gonad morphogenesis	biological_process	0.331944	1	1	SMAD4
GO:0016263	glycoprotein-N-acetylgalactosamine 3-beta-galactosyltransferase activity	molecular_function	0.331944	1	1	ENSSSCG00000015341
GO:1902459	positive regulation of stem cell population maintenance	biological_process	0.331944	1	1	YAP1
GO:0007600	sensory perception	biological_process	0.331944	1	1	MYO7A
GO:0070110	ciliary neurotrophic factor receptor complex	cellular_component	0.331944	1	1	IL6ST
GO:0019784	NEDD8-specific protease activity	molecular_function	0.331944	1	1	ENSSSCG00000009241
GO:0016423	tRNA(guanine methyltransferase activity)	molecular_function	0.331944	1	1	TARBP1
GO:0045762	positive regulation of adenylate cyclase activity	biological_process	0.331944	1	1	NF1
GO:1901896	positive regulation of calcium-transporting ATPase activity	biological_process	0.331944	1	1	RYR2
GO:0060389	pathway-restricted SMAD protein phosphorylation	biological_process	0.331944	1	1	ACVR1
GO:0060005	vestibular reflex	biological_process	0.331944	1	1	NR4A3
GO:2000536	negative regulation of entry of bacterium into host cell	biological_process	0.331944	1	1	ITGAV
GO:0051918	negative regulation of fibrinolysis	biological_process	0.331944	1	1	THBS1
GO:0035748	myelin sheath abaxonal region	cellular_component	0.331944	1	1	DLG1
GO:0006924	activation-induced cell death of T cells	biological_process	0.331944	1	1	DNAJA3
GO:0008424	glycoprotein 6-alpha-L-fucosyltransferase activity	molecular_function	0.331944	1	1	FUT8
GO:0003300	cardiac muscle hypertrophy	biological_process	0.331944	1	1	RYR2
GO:0060315	negative regulation of ryanodine-sensitive calcium-release channel activity	biological_process	0.331944	1	1	PKD2
GO:0090382	phagosome maturation	biological_process	0.331944	1	1	RAB14
GO:0021683	cerebellar granular layer morphogenesis	biological_process	0.331944	1	1	SERPINE2
GO:0019348	dolichol metabolic process	biological_process	0.331944	1	1	SRD5A3
GO:0042788	polysomal ribosome	cellular_component	0.331944	1	1	LARP4B
GO:0086029	Purkinje myocyte to ventricular cardiac muscle cell signaling	biological_process	0.331944	1	1	RYR2
GO:0002051	osteoblast fate commitment	biological_process	0.331944	1	1	SH3PXD2B
GO:0005652	nuclear lamina	cellular_component	0.331944	1	1	CASK
GO:0034441	plasma lipoprotein particle oxidation	biological_process	0.331944	1	1	PLA2G7
GO:0000018	regulation of DNA recombination	biological_process	0.331944	1	1	SMARCAD1
GO:2001135	regulation of endocytic recycling	biological_process	0.331944	1	1	INPP5F
GO:0030616	transforming growth factor beta receptor, common-partner cytoplasmic mediator activity	molecular_function	0.331944	1	1	SMAD4
GO:0072574	hepatocyte proliferation	biological_process	0.331944	1	1	MKI67
GO:0072091	regulation of stem cell proliferation	biological_process	0.331944	1	1	YAP1
GO:0070579	methylcytosine dioxygenase activity	molecular_function	0.331944	1	1	TET3
GO:0051386	regulation of neurotrophin TRK receptor signaling pathway	biological_process	0.331944	1	1	SLC9A6
GO:0061740	protein targeting to lysosome involved in chaperone-mediated autophagy	NA	0.331944	1	1	LAMP2
GO:0038093	Fc receptor signaling pathway	biological_process	0.331944	1	1	KIT
GO:0007352	zygotic specification of dorsal/ventral axis	biological_process	0.331944	1	1	SMAD2
GO:1990707	nuclear subtelomeric heterochromatin	NA	0.331944	1	1	ATRX
GO:1990145	maintenance of translational fidelity	biological_process	0.331944	1	1	CDKAL1
GO:0098908	regulation of neuronal action potential	biological_process	0.331944	1	1	FGF12
GO:0000320	re-entry into mitotic cell cycle	biological_process	0.331944	1	1	GSK3B
GO:1905599	positive regulation of low-density lipoprotein receptor activity	NA	0.331944	1	1	ANXA2
GO:0060385	axonogenesis involved in innervation	biological_process	0.331944	1	1	NRP1
GO:0098735	positive regulation of the force of heart contraction	biological_process	0.331944	1	1	RYR2
GO:0080144	amino acid homeostasis	biological_process	0.331944	1	1	PQLC2
GO:0010867	positive regulation of triglyceride biosynthetic process	biological_process	0.331944	1	1	SCARB1
GO:0004909	interleukin-1, Type I, activating receptor activity	molecular_function	0.331944	1	1	IL1R1
GO:0044231	host cell presynaptic membrane	cellular_component	0.331944	1	1	ENSSSCG00000010525
GO:2000253	positive regulation of feeding behavior	biological_process	0.331944	1	1	NR4A3
GO:0044308	axonal spine	cellular_component	0.331944	1	1	SLC9A6
GO:0045540	regulation of cholesterol biosynthetic process	biological_process	0.331944	1	1	SCAP
GO:0002369	T cell cytokine production	biological_process	0.331944	1	1	DLG1
GO:0060449	bud elongation involved in lung branching	biological_process	0.331944	1	1	YAP1
GO:0008090	retrograde axonal transport	biological_process	0.331944	1	1	PAFAH1B1
GO:1902340	negative regulation of chromosome condensation	biological_process	0.331944	1	1	H3F3A
GO:0002320	lymphoid progenitor cell differentiation	biological_process	0.331944	1	1	KIT
GO:0051610	serotonin uptake	biological_process	0.331944	1	1	SLC6A4
GO:0032784	regulation of DNA-templated transcription, elongation	biological_process	0.331944	1	1	ERCC6
GO:0017187	peptidyl-glutamic acid carboxylation	biological_process	0.331944	1	1	GGCX
GO:0040016	embryonic cleavage	biological_process	0.331944	1	1	TOP2A
GO:0035409	histone H3-Y41 phosphorylation	biological_process	0.331944	1	1	JAK2
GO:0003274	endocardial cushion fusion	biological_process	0.331944	1	1	ACVR1
GO:0007413	axonal fasciculation	biological_process	0.331944	1	1	NRP1
GO:0048846	axon extension involved in axon guidance	biological_process	0.331944	1	1	NRP1
GO:1990037	Lewy body core	cellular_component	0.331944	1	1	FBXO7
GO:0097056	selenocysteinyl-tRNASec biosynthetic process	biological_process	0.331944	1	1	ENSSSCG00000025315
GO:0043537	negative regulation of blood vessel endothelial cell migration	biological_process	0.331944	1	1	THBS1
GO:0050501	hyaluronan synthase activity	molecular_function	0.331944	1	1	SHAS2
GO:0002353	plasma kallikrein-kinin cascade	biological_process	0.331944	1	1	PRCP
GO:0001952	regulation of cell-matrix adhesion	biological_process	0.331944	1	1	NF1
GO:0007296	vitellogenesis	biological_process	0.331944	1	1	ETV6
GO:0043558	regulation of translational initiation in response to stress	biological_process	0.331944	1	1	EIF2S1
GO:0034722	gamma-glutamyl-peptidase activity	molecular_function	0.331944	1	1	GGH
GO:0097200	cysteine-type endopeptidase activity involved in execution phase of apoptosis	molecular_function	0.331944	1	1	CFLAR
GO:0071880	adenylate cyclase-activating adrenergic receptor signaling pathway	biological_process	0.331944	1	1	RAPGEF2
GO:0090003	regulation of establishment of protein localization to plasma membrane	biological_process	0.331944	1	1	AR
GO:0055102	lipase inhibitor activity	molecular_function	0.331944	1	1	FAF2
GO:0018095	protein polyglutamylation	biological_process	0.331944	1	1	TTLL7
GO:0005330	dopamine:sodium symporter activity	molecular_function	0.331944	1	1	SLC6A4
GO:0045870	positive regulation of single stranded viral RNA replication via double stranded DNA intermediate	biological_process	0.331944	1	1	TOP2A
GO:0031017	exocrine pancreas development	biological_process	0.331944	1	1	WLS
GO:0035441	cell migration involved in vasculogenesis	biological_process	0.331944	1	1	SETD2
GO:0000453	enzyme-directed rRNA 2'-O-methylation	biological_process	0.331944	1	1	TARBP1
GO:0006582	melanin metabolic process	biological_process	0.331944	1	1	MYO5A
GO:2001038	regulation of cellular response to drug	biological_process	0.331944	1	1	NCOA1
GO:0051583	dopamine uptake involved in synaptic transmission	biological_process	0.331944	1	1	SLC6A4
GO:2001170	negative regulation of ATP biosynthetic process	biological_process	0.331944	1	1	PARP1
GO:0004816	asparagine-tRNA ligase activity	molecular_function	0.331944	1	1	NARS2
GO:0006929	substrate-dependent cell migration	biological_process	0.331944	1	1	ITGA2
GO:0050764	regulation of phagocytosis	biological_process	0.331944	1	1	ITGAV
GO:1901385	regulation of voltage-gated calcium channel activity	biological_process	0.331944	1	1	CACNB1
GO:0010793	regulation of mRNA export from nucleus	biological_process	0.331944	1	1	SETD2
GO:0097462	Lewy neurite	cellular_component	0.331944	1	1	FBXO7
GO:0015844	monoamine transport	biological_process	0.331944	1	1	SLC6A4
GO:0000469	cleavage involved in rRNA processing	biological_process	0.331944	1	1	NOB1
GO:0034497	protein localization to pre-autophagosomal structure	biological_process	0.331944	1	1	STX17
GO:0008242	omega peptidase activity	molecular_function	0.331944	1	1	GGH
GO:0003896	DNA primase activity	molecular_function	0.331944	1	1	ENSSSCG00000001493
GO:0018205	peptidyl-lysine modification	biological_process	0.331944	1	1	MDM2
GO:0006662	glycerol ether metabolic process	biological_process	0.331944	1	1	TXN2
GO:0060009	Sertoli cell development	biological_process	0.331944	1	1	ATRX
GO:0034380	high-density lipoprotein particle assembly	biological_process	0.331944	1	1	ABCA7
GO:1901992	positive regulation of mitotic cell cycle phase transition	biological_process	0.331944	1	1	TMOD3
GO:0021516	dorsal spinal cord development	biological_process	0.331944	1	1	PBX3
GO:1904191	positive regulation of cyclin-dependent protein serine/threonine kinase activity involved in meiotic nuclear division	NA	0.331944	1	1	MASTL
GO:0035749	myelin sheath adaxonal region	cellular_component	0.331944	1	1	ANXA2
GO:0004504	peptidylglycine monooxygenase activity	molecular_function	0.331944	1	1	PAM
GO:0002532	production of molecular mediator involved in inflammatory response	biological_process	0.331944	1	1	IL4R
GO:0090176	microtubule cytoskeleton organization involved in establishment of planar polarity	biological_process	0.331944	1	1	PAFAH1B1
GO:0060763	mammary duct terminal end bud growth	biological_process	0.331944	1	1	KDM5B
GO:0098639	collagen binding involved in cell-matrix adhesion	molecular_function	0.331944	1	1	ITGA2
GO:0060123	regulation of growth hormone secretion	biological_process	0.331944	1	1	CHD7
GO:0043132	NAD transport	biological_process	0.331944	1	1	SLC25A17
GO:0006362	transcription elongation from RNA polymerase I promoter	biological_process	0.331944	1	1	ERCC6
GO:0031161	phosphatidylinositol catabolic process	biological_process	0.331944	1	1	INPP5F
GO:0005176	ErbB-2 class receptor binding	molecular_function	0.331944	1	1	ENSSSCG00000016953
GO:0042518	negative regulation of tyrosine phosphorylation of Stat3 protein	biological_process	0.331944	1	1	INPP5F
GO:0031933	telomeric heterochromatin	cellular_component	0.331944	1	1	ATRX
GO:0001961	positive regulation of cytokine-mediated signaling pathway	biological_process	0.331944	1	1	PAFAH1B1
GO:0061511	centriole elongation	biological_process	0.331944	1	1	C2CD3
GO:0071474	cellular hyperosmotic response	biological_process	0.331944	1	1	YBX3
GO:1900748	positive regulation of vascular endothelial growth factor signaling pathway	biological_process	0.331944	1	1	CCBE1
GO:0045842	positive regulation of mitotic metaphase/anaphase transition	biological_process	0.331944	1	1	RB1
GO:0048246	macrophage chemotaxis	biological_process	0.331944	1	1	NUP85
GO:2001027	negative regulation of endothelial cell chemotaxis	biological_process	0.331944	1	1	THBS1
GO:0003190	atrioventricular valve formation	biological_process	0.331944	1	1	SMAD4
GO:0045662	negative regulation of myoblast differentiation	biological_process	0.331944	1	1	MBNL3
GO:0032796	uropod organization	biological_process	0.331944	1	1	MYH9
GO:0038109	Kit signaling pathway	biological_process	0.331944	1	1	KIT
GO:0035523	protein K29-linked deubiquitination	biological_process	0.331944	1	1	ZRANB1
GO:0060374	mast cell differentiation	biological_process	0.331944	1	1	KIT
GO:0070120	ciliary neurotrophic factor-mediated signaling pathway	biological_process	0.331944	1	1	IL6ST
GO:1902860	propionyl-CoA biosynthetic process	biological_process	0.331944	1	1	ACAT1
GO:0034393	positive regulation of smooth muscle cell apoptotic process	biological_process	0.331944	1	1	MAP2K4
GO:1901166	neural crest cell migration involved in autonomic nervous system development	biological_process	0.331944	1	1	NRP1
GO:0004923	leukemia inhibitory factor receptor activity	molecular_function	0.331944	1	1	IL6ST
GO:0042908	xenobiotic transport	biological_process	0.331944	1	1	ABCC1
GO:0019373	epoxygenase P450 pathway	biological_process	0.331944	1	1	ENSSSCG00000010488
GO:0048662	negative regulation of smooth muscle cell proliferation	biological_process	0.331944	1	1	PPARG
GO:0003847	1-alkyl-2-acetylglycerophosphocholine esterase activity	molecular_function	0.331944	1	1	PLA2G7
GO:1900402	regulation of carbohydrate metabolic process by regulation of transcription from RNA polymerase II promoter	biological_process	0.331944	1	1	MLXIP
GO:0015293	symporter activity	molecular_function	0.331944	1	1	SLC6A4
GO:0043031	negative regulation of macrophage activation	biological_process	0.331944	1	1	NR1H3
GO:0071816	tail-anchored membrane protein insertion into ER membrane	biological_process	0.331944	1	1	WRB
GO:0030823	regulation of cGMP metabolic process	biological_process	0.331944	1	1	THBS1
GO:0030261	chromosome condensation	biological_process	0.331944	1	1	TOP2A
GO:0060336	negative regulation of interferon-gamma-mediated signaling pathway	biological_process	0.331944	1	1	PPARG
GO:0012507	ER to Golgi transport vesicle membrane	cellular_component	0.331944	1	1	USO1
GO:0072249	metanephric glomerular visceral epithelial cell development	biological_process	0.331944	1	1	NPHS2
GO:0030950	establishment or maintenance of actin cytoskeleton polarity	biological_process	0.331944	1	1	RICTOR
GO:0031045	dense core granule	cellular_component	0.331944	1	1	VPS13A
GO:0004300	enoyl-CoA hydratase activity	molecular_function	0.331944	1	1	HADHA
GO:0071797	LUBAC complex	cellular_component	0.331944	1	1	ENSSSCG00000002003
GO:0003979	UDP-glucose 6-dehydrogenase activity	molecular_function	0.331944	1	1	UGDH
GO:0045626	negative regulation of T-helper 1 cell differentiation	biological_process	0.331944	1	1	IL4R
GO:0042043	neurexin family protein binding	molecular_function	0.331944	1	1	CASK
GO:0008458	carnitine O-octanoyltransferase activity	molecular_function	0.331944	1	1	CROT
GO:0000961	negative regulation of mitochondrial RNA catabolic process	biological_process	0.331944	1	1	LRPPRC
GO:0048841	regulation of axon extension involved in axon guidance	biological_process	0.331944	1	1	NRP1
GO:0004998	transferrin receptor activity	molecular_function	0.331944	1	1	TFRC
GO:0006772	thiamine metabolic process	biological_process	0.331944	1	1	TPK1
GO:1901581	negative regulation of telomeric RNA transcription from RNA pol II promoter	biological_process	0.331944	1	1	ATRX
GO:0032057	negative regulation of translational initiation in response to stress	biological_process	0.331944	1	1	EIF2S1
GO:0035189	Rb-E2F complex	cellular_component	0.331944	1	1	RB1
GO:0050801	ion homeostasis	biological_process	0.331944	1	1	KLHL3
GO:0019065	receptor-mediated endocytosis of virus by host cell	biological_process	0.331944	1	1	EPS15
GO:0060193	positive regulation of lipase activity	biological_process	0.331944	1	1	RHOC
GO:0034684	integrin alphav-beta5 complex	cellular_component	0.331944	1	1	ITGAV
GO:0005638	lamin filament	cellular_component	0.331944	1	1	NARF
GO:0004699	calcium-independent protein kinase C activity	molecular_function	0.331944	1	1	PRKCE
GO:0071466	cellular response to xenobiotic stimulus	biological_process	0.331944	1	1	RB1
GO:0072660	maintenance of protein location in plasma membrane	biological_process	0.331944	1	1	ANK3
GO:0080019	fatty-acyl-CoA reductase(alcohol-forming activity)	molecular_function	0.331944	1	1	FAR1
GO:0097050	type B pancreatic cell apoptotic process	biological_process	0.331944	1	1	RYR2
GO:0006592	ornithine biosynthetic process	biological_process	0.331944	1	1	ALDH18A1
GO:0008273	calcium, potassium:sodium antiporter activity	molecular_function	0.331944	1	1	ENSSSCG00000007100
GO:0051089	constitutive protein ectodomain proteolysis	biological_process	0.331944	1	1	ADAM10
GO:0043229	intracellular organelle	cellular_component	0.331944	1	1	SLC23A1
GO:0070723	response to cholesterol	biological_process	0.331944	1	1	SMAD2
GO:0070822	Sin3-type complex	cellular_component	0.331944	1	1	SAP130
GO:0019781	NEDD8 activating enzyme activity	molecular_function	0.331944	1	1	UBA3
GO:0031547	brain-derived neurotrophic factor receptor signaling pathway	biological_process	0.331944	1	1	SLC9A6
GO:0032762	mast cell cytokine production	biological_process	0.331944	1	1	KIT
GO:0035669	TRAM-dependent toll-like receptor 4 signaling pathway	biological_process	0.331944	1	1	PRKCE
GO:0005319	lipid transporter activity	molecular_function	0.331944	1	1	NPC1
GO:0032588	trans-Golgi network membrane	cellular_component	0.331944	1	1	ARFIP1
GO:0070051	fibrinogen binding	molecular_function	0.331944	1	1	THBS1
GO:0072431	signal transduction involved in mitotic G1 DNA damage checkpoint	biological_process	0.331944	1	1	PRKDC
GO:0055098	response to low-density lipoprotein particle	biological_process	0.331944	1	1	PPARG
GO:0090541	MIT domain binding	molecular_function	0.331944	1	1	CAPN7
GO:0060740	prostate gland epithelium morphogenesis	biological_process	0.331944	1	1	AR
GO:0007405	neuroblast proliferation	biological_process	0.331944	1	1	PAFAH1B1
GO:0016561	protein import into peroxisome matrix, translocation	biological_process	0.331944	1	1	PEX14
GO:0032765	positive regulation of mast cell cytokine production	biological_process	0.331944	1	1	NR4A3
GO:0035473	lipase binding	molecular_function	0.331944	1	1	FAF2
GO:0097157	pre-mRNA intronic binding	molecular_function	0.331944	1	1	EP300
GO:0061768	magnesium:sodium antiporter activity	NA	0.331944	1	1	SLC41A1
GO:0023057	negative regulation of signaling	biological_process	0.331944	1	1	MVP
GO:0018230	peptidyl-L-cysteine S-palmitoylation	biological_process	0.331944	1	1	ZDHHC7
GO:0052650	NADP-retinol dehydrogenase activity	molecular_function	0.331944	1	1	RDH11
GO:0030975	thiamine binding	molecular_function	0.331944	1	1	TPK1
GO:1901379	regulation of potassium ion transmembrane transport	biological_process	0.331944	1	1	KCNN2
GO:1905602	positive regulation of receptor-mediated endocytosis involved in cholesterol transport	NA	0.331944	1	1	ANXA2
GO:0070508	cholesterol import	biological_process	0.331944	1	1	SCARB1
GO:0048859	formation of anatomical boundary	biological_process	0.331944	1	1	SMAD4
GO:0001618	virus receptor activity	molecular_function	0.331944	1	1	XPR1
GO:0035845	photoreceptor cell outer segment organization	biological_process	0.331944	1	1	AHI1
GO:0045910	negative regulation of DNA recombination	biological_process	0.331944	1	1	MSH3
GO:0010447	response to acidic pH	biological_process	0.331944	1	1	CTSS
GO:0070740	tubulin-glutamic acid ligase activity	molecular_function	0.331944	1	1	TTLL7
GO:0015189	L-lysine transmembrane transporter activity	molecular_function	0.331944	1	1	PQLC2
GO:0032026	response to magnesium ion	biological_process	0.331944	1	1	THBS1
GO:0090026	positive regulation of monocyte chemotaxis	biological_process	0.331944	1	1	PLA2G7
GO:0003431	growth plate cartilage chondrocyte development	biological_process	0.331944	1	1	POC1A
GO:0006482	protein demethylation	biological_process	0.331944	1	1	KDM1A
GO:0060085	smooth muscle relaxation of the bladder outlet	biological_process	0.331944	1	1	PGR
GO:1905150	regulation of voltage-gated sodium channel activity	NA	0.331944	1	1	FGF12
GO:0046881	positive regulation of follicle-stimulating hormone secretion	biological_process	0.331944	1	1	SMAD4
GO:0010880	regulation of release of sequestered calcium ion into cytosol by sarcoplasmic reticulum	biological_process	0.331944	1	1	CHD7
GO:1990391	DNA repair complex	cellular_component	0.331944	1	1	KDM1A
GO:0035735	intraciliary transport involved in cilium assembly	biological_process	0.331944	1	1	CEP131
GO:0036120	cellular response to platelet-derived growth factor stimulus	biological_process	0.331944	1	1	SHAS2
GO:2000864	regulation of estradiol secretion	biological_process	0.331944	1	1	KDM5B
GO:0048535	lymph node development	biological_process	0.331944	1	1	RC3H1
GO:0046899	nucleoside triphosphate adenylate kinase activity	molecular_function	0.331944	1	1	ENSSSCG00000003808
GO:2001031	positive regulation of cellular glucuronidation	biological_process	0.331944	1	1	PRKCE
GO:0007292	female gamete generation	biological_process	0.331944	1	1	ENSSSCG00000012474
GO:0021828	gonadotrophin-releasing hormone neuronal migration to the hypothalamus	biological_process	0.331944	1	1	NRP1
GO:0004857	enzyme inhibitor activity	molecular_function	0.331944	1	1	CRIM1
GO:0065001	specification of axis polarity	biological_process	0.331944	1	1	AHI1
GO:0045651	positive regulation of macrophage differentiation	biological_process	0.331944	1	1	RB1
GO:0071174	mitotic spindle checkpoint	biological_process	0.331944	1	1	CSNK2A2
GO:0043277	apoptotic cell clearance	biological_process	0.331944	1	1	ITGAV
GO:0004135	amylo-alpha-1,6-glucosidase activity	molecular_function	0.331944	1	1	AGL
GO:0061470	T follicular helper cell differentiation	biological_process	0.331944	1	1	RC3H1
GO:0030214	hyaluronan catabolic process	biological_process	0.331944	1	1	CD44
GO:0015813	L-glutamate transport	biological_process	0.331944	1	1	SLC25A13
GO:0010822	positive regulation of mitochondrion organization	biological_process	0.331944	1	1	GSK3B
GO:0010894	negative regulation of steroid biosynthetic process	biological_process	0.331944	1	1	INSIG1
GO:0045830	positive regulation of isotype switching	biological_process	0.331944	1	1	TFRC
GO:0006172	ADP biosynthetic process	biological_process	0.331944	1	1	ENSSSCG00000003808
GO:0006837	serotonin transport	biological_process	0.331944	1	1	SLC6A4
GO:0045720	negative regulation of integrin biosynthetic process	biological_process	0.331944	1	1	AR
GO:1990144	intrinsic apoptotic signaling pathway in response to hypoxia	biological_process	0.331944	1	1	BNIP3
GO:0061355	Wnt protein secretion	biological_process	0.331944	1	1	WLS
GO:0008506	sucrose:proton symporter activity	molecular_function	0.331944	1	1	SLC45A4
GO:0070831	basement membrane assembly	biological_process	0.331944	1	1	ENSSSCG00000015556
GO:0031935	regulation of chromatin silencing	biological_process	0.331944	1	1	HIRA
GO:0019908	nuclear cyclin-dependent protein kinase holoenzyme complex	cellular_component	0.331944	1	1	CDK13
GO:0010631	epithelial cell migration	biological_process	0.331944	1	1	PKN2
GO:0042117	monocyte activation	biological_process	0.331944	1	1	ADAM10
GO:0038190	VEGF-activated neuropilin signaling pathway	biological_process	0.331944	1	1	NRP1
GO:0070814	hydrogen sulfide biosynthetic process	biological_process	0.331944	1	1	PAPSS2
GO:0060448	dichotomous subdivision of terminal units involved in lung branching	biological_process	0.331944	1	1	CTSH
GO:2000661	positive regulation of interleukin-1-mediated signaling pathway	biological_process	0.331944	1	1	IL1R1
GO:2000736	regulation of stem cell differentiation	biological_process	0.331944	1	1	KDM3A
GO:0001875	lipopolysaccharide receptor activity	molecular_function	0.331944	1	1	SCARB1
GO:0090311	regulation of protein deacetylation	biological_process	0.331944	1	1	SPRED1
GO:0035303	regulation of dephosphorylation	biological_process	0.331944	1	1	SMG5
GO:1903923	positive regulation of protein processing in phagocytic vesicle	NA	0.331944	1	1	MYH9
GO:1990452	Parkin-FBXW7-Cul1 ubiquitin ligase complex	cellular_component	0.331944	1	1	CUL1
GO:0036071	N-glycan fucosylation	biological_process	0.331944	1	1	FUT8
GO:0051148	negative regulation of muscle cell differentiation	biological_process	0.331944	1	1	PTBP1
GO:0004115	3',5'-cyclic-AMP phosphodiesterase activity	molecular_function	0.331944	1	1	PDE8A
GO:0016668	oxidoreductase activity, acting on a sulfur group of donors, NADP as acceptor	molecular_function	0.331944	1	1	ENSSSCG00000015844
GO:0021895	cerebral cortex neuron differentiation	biological_process	0.331944	1	1	GDPD5
GO:0008035	high-density lipoprotein particle binding	molecular_function	0.331944	1	1	SCARB1
GO:0043654	recognition of apoptotic cell	biological_process	0.331944	1	1	SCARB1
GO:0006481	C-terminal protein methylation	biological_process	0.331944	1	1	ENSSSCG00000007826
GO:0030212	hyaluronan metabolic process	biological_process	0.331944	1	1	SHAS2
GO:0019211	phosphatase activator activity	molecular_function	0.331944	1	1	GTF2F1
GO:0035701	hematopoietic stem cell migration	biological_process	0.331944	1	1	KIT
GO:0002281	macrophage activation involved in immune response	biological_process	0.331944	1	1	PRKCE
GO:0043184	vascular endothelial growth factor receptor 2 binding	molecular_function	0.331944	1	1	ENSSSCG00000001695
GO:0042535	positive regulation of tumor necrosis factor biosynthetic process	biological_process	0.331944	1	1	THBS1
GO:0050957	equilibrioception	biological_process	0.331944	1	1	MYO7A
GO:0071910	determination of liver left/right asymmetry	biological_process	0.331944	1	1	PKD2
GO:0031667	response to nutrient levels	biological_process	0.331944	1	1	ACACB
GO:0010941	regulation of cell death	biological_process	0.331944	1	1	SLC25A24
GO:0034683	integrin alphav-beta3 complex	cellular_component	0.331944	1	1	ITGAV
GO:0060340	positive regulation of type I interferon-mediated signaling pathway	biological_process	0.331944	1	1	UBE2K
GO:0007422	peripheral nervous system development	biological_process	0.331944	1	1	NF1
GO:0019934	cGMP-mediated signaling	biological_process	0.331944	1	1	PRKG1
GO:1902745	positive regulation of lamellipodium organization	biological_process	0.331944	1	1	CARMIL1
GO:2000179	positive regulation of neural precursor cell proliferation	biological_process	0.331944	1	1	KDM1A
GO:0034721	histone H3-K4 demethylation, trimethyl-H3-K4-specific	biological_process	0.331944	1	1	KDM5B
GO:0042297	vocal learning	biological_process	0.331944	1	1	HTT
GO:0090259	regulation of retinal ganglion cell axon guidance	biological_process	0.331944	1	1	NRP1
GO:0015819	lysine transport	biological_process	0.331944	1	1	PQLC2
GO:0036312	phosphatidylinositol 3-kinase regulatory subunit binding	molecular_function	0.331944	1	1	PTPN13
GO:0003127	detection of nodal flow	biological_process	0.331944	1	1	PKD2
GO:0008623	CHRAC	cellular_component	0.331944	1	1	BAZ1A
GO:0001964	startle response	biological_process	0.331944	1	1	PCDH15
GO:1901098	positive regulation of autophagosome maturation	biological_process	0.331944	1	1	FYCO1
GO:0034334	adherens junction maintenance	biological_process	0.331944	1	1	AFDN
GO:0019970	interleukin-11 binding	molecular_function	0.331944	1	1	IL6ST
GO:0010878	cholesterol storage	biological_process	0.331944	1	1	SOAT1
GO:0086070	SA node cell to atrial cardiac muscle cell communication	biological_process	0.331944	1	1	ANK2
GO:0043219	lateral loop	cellular_component	0.331944	1	1	DLG1
GO:0050436	microfibril binding	molecular_function	0.331944	1	1	LTBP1
GO:0035988	chondrocyte proliferation	biological_process	0.331944	1	1	MMP16
GO:0006167	AMP biosynthetic process	biological_process	0.331944	1	1	ADK
GO:0006892	post-Golgi vesicle-mediated transport	biological_process	0.331944	1	1	MYO5A
GO:0001191	transcriptional repressor activity, RNA polymerase II transcription factor binding	molecular_function	0.331944	1	1	CREBBP
GO:0019966	interleukin-1 binding	molecular_function	0.331944	1	1	IL1R1
GO:0032392	DNA geometric change	biological_process	0.331944	1	1	ENSSSCG00000012745
GO:0070052	collagen V binding	molecular_function	0.331944	1	1	THBS1
GO:0032139	dinucleotide insertion or deletion binding	molecular_function	0.331944	1	1	MSH3
GO:0050659	N-acetylgalactosamine 4-sulfate 6-O-sulfotransferase activity	molecular_function	0.331944	1	1	CHST15
GO:1990245	histone H2A-T120 phosphorylation	biological_process	0.331944	1	1	DCAF1
GO:0004726	non-membrane spanning protein tyrosine phosphatase activity	molecular_function	0.331944	1	1	PTPN4
GO:1904761	negative regulation of myofibroblast differentiation	NA	0.331944	1	1	PDCD4
GO:0036211	protein modification process	biological_process	0.331944	1	1	PARP1
GO:0048642	negative regulation of skeletal muscle tissue development	biological_process	0.331944	1	1	YBX3
GO:0071279	cellular response to cobalt ion	biological_process	0.331944	1	1	BNIP3
GO:0007638	mechanosensory behavior	biological_process	0.331944	1	1	STRBP
GO:0043129	surfactant homeostasis	biological_process	0.331944	1	1	CTSH
GO:0046356	acetyl-CoA catabolic process	biological_process	0.331944	1	1	ACAT1
GO:0050920	regulation of chemotaxis	biological_process	0.331944	1	1	EFNB2
GO:0034274	Atg12-Atg5-Atg16 complex	cellular_component	0.331944	1	1	WDFY3
GO:0002378	immunoglobulin biosynthetic process	biological_process	0.331944	1	1	GALNT2
GO:0045226	extracellular polysaccharide biosynthetic process	biological_process	0.331944	1	1	SHAS2
GO:0010766	negative regulation of sodium ion transport	biological_process	0.331944	1	1	SERPINE2
GO:1905065	positive regulation of vascular smooth muscle cell differentiation	NA	0.331944	1	1	KIT
GO:0023016	signal transduction by trans-phosphorylation	biological_process	0.331944	1	1	WNK1
GO:0051567	histone H3-K9 methylation	biological_process	0.331944	1	1	PRDM5
GO:0005138	interleukin-6 receptor binding	molecular_function	0.331944	1	1	IL6ST
GO:0036500	ATF6-mediated unfolded protein response	NA	0.331944	1	1	MBTPS2
GO:0034775	glutathione transmembrane transport	biological_process	0.331944	1	1	ABCC1
GO:0007565	female pregnancy	biological_process	0.331944	1	1	CORIN
GO:0098597	observational learning	biological_process	0.331944	1	1	NF1
GO:0033152	immunoglobulin VDJ recombination	biological_process	0.331944	1	1	PRKDC
GO:0030132	clathrin coat of coated pit	cellular_component	0.331944	1	1	EPS15
GO:0031314	extrinsic component of mitochondrial inner membrane	cellular_component	0.331944	1	1	COQ6
GO:0048731	system development	biological_process	0.331944	1	1	ENSSSCG00000015556
GO:0043369	CD4-positive or CD8-positive, alpha-beta T cell lineage commitment	biological_process	0.331944	1	1	BRAF
GO:0006643	membrane lipid metabolic process	biological_process	0.331944	1	1	ENSSSCG00000015356
GO:0044783	G1 DNA damage checkpoint	biological_process	0.331944	1	1	WAC
GO:0080122	AMP transmembrane transporter activity	molecular_function	0.331944	1	1	SLC25A17
GO:0051130	positive regulation of cellular component organization	biological_process	0.331944	1	1	PAFAH1B1
GO:0072015	glomerular visceral epithelial cell development	biological_process	0.331944	1	1	MYO1E
GO:0034349	glial cell apoptotic process	biological_process	0.331944	1	1	RB1
GO:0048002	antigen processing and presentation of peptide antigen	biological_process	0.331944	1	1	CTSS
GO:0061551	trigeminal ganglion development	biological_process	0.331944	1	1	NRP1
GO:0070295	renal water absorption	biological_process	0.331944	1	1	SHAS2
GO:0016628	oxidoreductase activity, acting on the CH-CH group of donors, NAD or NADP as acceptor	molecular_function	0.331944	1	1	SRD5A3
GO:0000435	positive regulation of transcription from RNA polymerase II promoter by galactose	biological_process	0.331944	1	1	NCOA1
GO:0016602	CCAAT-binding factor complex	cellular_component	0.331944	1	1	NFYC
GO:0046786	viral replication complex formation and maintenance	biological_process	0.331944	1	1	PI4KA
GO:0032142	single guanine insertion binding	molecular_function	0.331944	1	1	MSH3
GO:1902995	positive regulation of phospholipid efflux	biological_process	0.331944	1	1	ABCA7
GO:0043306	positive regulation of mast cell degranulation	biological_process	0.331944	1	1	IL4R
GO:0004772	sterol O-acyltransferase activity	molecular_function	0.331944	1	1	SOAT1
GO:0004001	adenosine kinase activity	molecular_function	0.331944	1	1	ADK
GO:0070418	DNA-dependent protein kinase complex	cellular_component	0.331944	1	1	UVRAG
GO:1902430	negative regulation of beta-amyloid formation	biological_process	0.331944	1	1	ABCA7
GO:0004077	biotin-[acetyl-CoA-carboxylase] ligase activity	molecular_function	0.331944	1	1	ENSSSCG00000012059
GO:0043353	enucleate erythrocyte differentiation	biological_process	0.331944	1	1	RB1
GO:0006421	asparaginyl-tRNA aminoacylation	biological_process	0.331944	1	1	NARS2
GO:0005010	insulin-like growth factor-activated receptor activity	molecular_function	0.331944	1	1	IGF1R
GO:0035598	N6-threonylcarbomyladenosine methylthiotransferase activity	molecular_function	0.331944	1	1	CDKAL1
GO:0090292	nuclear matrix anchoring at nuclear membrane	biological_process	0.331944	1	1	SUN2
GO:0010040	response to ironII ion	biological_process	0.331944	1	1	ACO1
GO:0000120	RNA polymerase I transcription factor complex	cellular_component	0.331944	1	1	TAF1A
GO:0060215	primitive hemopoiesis	biological_process	0.331944	1	1	STK3
GO:0006990	positive regulation of transcription from RNA polymerase II promoter involved in unfolded protein response	biological_process	0.331944	1	1	EP300
GO:0042921	glucocorticoid receptor signaling pathway	biological_process	0.331944	1	1	PTGES3
GO:0045026	plasma membrane fusion	biological_process	0.331944	1	1	VASH2
GO:0060748	tertiary branching involved in mammary gland duct morphogenesis	biological_process	0.331944	1	1	AR
GO:0097016	L27 domain binding	molecular_function	0.331944	1	1	DLG1
GO:0006741	NADP biosynthetic process	biological_process	0.331944	1	1	NADK2
GO:0004689	phosphorylase kinase activity	molecular_function	0.331944	1	1	PHKB
GO:0036002	pre-mRNA binding	molecular_function	0.331944	1	1	PTBP1
GO:0045016	mitochondrial magnesium ion transport	biological_process	0.331944	1	1	MRS2
GO:1903409	reactive oxygen species biosynthetic process	biological_process	0.331944	1	1	GBF1
GO:0060562	epithelial tube morphogenesis	biological_process	0.331944	1	1	PRKX
GO:0051084	'de novo' posttranslational protein folding	biological_process	0.331944	1	1	SH3GLB1
GO:0006169	adenosine salvage	biological_process	0.331944	1	1	ADK
GO:0060713	labyrinthine layer morphogenesis	biological_process	0.331944	1	1	NCOA1
GO:0034686	integrin alphav-beta8 complex	cellular_component	0.331944	1	1	ITGAV
GO:0004924	oncostatin-M receptor activity	molecular_function	0.331944	1	1	IL6ST
GO:0004134	4-alpha-glucanotransferase activity	molecular_function	0.331944	1	1	AGL
GO:0003251	positive regulation of cell proliferation involved in heart valve morphogenesis	biological_process	0.331944	1	1	SMAD4
GO:0046527	glucosyltransferase activity	molecular_function	0.331944	1	1	ALG6
GO:0021592	fourth ventricle development	biological_process	0.331944	1	1	MYH10
GO:0005137	interleukin-5 receptor binding	molecular_function	0.331944	1	1	SDCBP
GO:0097198	histone H3-K36 trimethylation	biological_process	0.331944	1	1	SETD2
GO:0072235	metanephric distal tubule development	biological_process	0.331944	1	1	PKD2
GO:0032497	detection of lipopolysaccharide	biological_process	0.331944	1	1	SCARB1
GO:0090288	negative regulation of cellular response to growth factor stimulus	biological_process	0.331944	1	1	CASK
GO:0004359	glutaminase activity	molecular_function	0.331944	1	1	GLS
GO:0010888	negative regulation of lipid storage	biological_process	0.331944	1	1	ITGAV
GO:0042574	retinal metabolic process	biological_process	0.331944	1	1	RDH11
GO:0010544	negative regulation of platelet activation	biological_process	0.331944	1	1	SERPINE2
GO:1902954	regulation of early endosome to recycling endosome transport	biological_process	0.331944	1	1	DNAJC13
GO:0018193	peptidyl-amino acid modification	biological_process	0.331944	1	1	ENSSSCG00000025087
GO:0019254	carnitine metabolic process, CoA-linked	biological_process	0.331944	1	1	ACADM
GO:0098904	regulation of AV node cell action potential	biological_process	0.331944	1	1	RYR2
GO:2000108	positive regulation of leukocyte apoptotic process	biological_process	0.331944	1	1	NR4A3
GO:0019164	pyruvate synthase activity	molecular_function	0.331944	1	1	OLFML3
GO:1990504	dense core granule exocytosis	biological_process	0.331944	1	1	CADPS2
GO:0072208	metanephric smooth muscle tissue development	biological_process	0.331944	1	1	PKD2
GO:0007220	Notch receptor processing	biological_process	0.331944	1	1	PSEN1
GO:0042048	olfactory behavior	biological_process	0.331944	1	1	CHD7
GO:0070257	positive regulation of mucus secretion	biological_process	0.331944	1	1	PRKCE
GO:0048185	activin binding	molecular_function	0.331944	1	1	ACVR1
GO:0045986	negative regulation of smooth muscle contraction	biological_process	0.331944	1	1	PRKG1
GO:0051601	exocyst localization	biological_process	0.331944	1	1	EXOC1
GO:0045726	positive regulation of integrin biosynthetic process	biological_process	0.331944	1	1	AR
GO:0060669	embryonic placenta morphogenesis	biological_process	0.331944	1	1	SETD2
GO:0048211	Golgi vesicle docking	biological_process	0.331944	1	1	USO1
GO:0016267	O-glycan processing, core 1	biological_process	0.331944	1	1	ENSSSCG00000015341
GO:0042523	positive regulation of tyrosine phosphorylation of Stat5 protein	biological_process	0.331944	1	1	KIT
GO:0050748	negative regulation of lipoprotein metabolic process	biological_process	0.331944	1	1	ITGAV
GO:0018423	protein C-terminal leucine carboxyl O-methyltransferase activity	molecular_function	0.331944	1	1	ENSSSCG00000007826
GO:0010613	positive regulation of cardiac muscle hypertrophy	biological_process	0.331944	1	1	CAMK2D
GO:0031264	death-inducing signaling complex	cellular_component	0.331944	1	1	CFLAR
GO:0031585	regulation of inositol 1,4,5-trisphosphate-sensitive calcium-release channel activity	biological_process	0.331944	1	1	MYO5A
GO:0004835	tubulin-tyrosine ligase activity	molecular_function	0.331944	1	1	TTL
GO:0030213	hyaluronan biosynthetic process	biological_process	0.331944	1	1	SHAS2
GO:0050973	detection of mechanical stimulus involved in equilibrioception	biological_process	0.331944	1	1	PCDH15
GO:1905597	positive regulation of low-density lipoprotein particle receptor binding	NA	0.331944	1	1	ANXA2
GO:2000616	negative regulation of histone H3-K9 acetylation	biological_process	0.331944	1	1	ZNF451
GO:0043368	positive T cell selection	biological_process	0.331944	1	1	BRAF
GO:0002224	toll-like receptor signaling pathway	biological_process	0.331944	1	1	RPS6KA3
GO:0034235	GPI anchor binding	molecular_function	0.331944	1	1	PIGU
GO:0016768	spermine synthase activity	molecular_function	0.331944	1	1	SMS
GO:0071930	negative regulation of transcription involved in G1/S transition of mitotic cell cycle	biological_process	0.331944	1	1	RB1
GO:0048864	stem cell development	biological_process	0.331944	1	1	SETD2
GO:0036444	mitochondrial calcium uptake	biological_process	0.331944	1	1	MICU1
GO:0003226	right ventricular compact myocardium morphogenesis	biological_process	0.331944	1	1	CHD7
GO:0042805	actinin binding	molecular_function	0.331944	1	1	PKD2
GO:0004598	peptidylamidoglycolate lyase activity	molecular_function	0.331944	1	1	PAM
GO:0032875	regulation of DNA endoreduplication	biological_process	0.331944	1	1	SENP2
GO:0004044	amidophosphoribosyltransferase activity	molecular_function	0.331944	1	1	PPAT
GO:0006369	termination of RNA polymerase II transcription	biological_process	0.331944	1	1	PCF11
GO:0051441	positive regulation of ubiquitin-protein ligase activity involved in meiotic cell cycle	biological_process	0.331944	1	1	MASTL
GO:0061133	endopeptidase activator activity	molecular_function	0.331944	1	1	PSMD14
GO:0004392	heme oxygenase(decyclizing activity)	molecular_function	0.331944	1	1	HMOX2
GO:1990038	Lewy body corona	cellular_component	0.331944	1	1	FBXO7
GO:0072307	regulation of metanephric nephron tubule epithelial cell differentiation	biological_process	0.331944	1	1	YAP1
GO:0032324	molybdopterin cofactor biosynthetic process	biological_process	0.331944	1	1	GPHN
GO:0007113	endomitotic cell cycle	biological_process	0.331944	1	1	UBA3
GO:0005513	detection of calcium ion	biological_process	0.331944	1	1	RYR2
GO:0000126	transcription factor TFIIIB complex	cellular_component	0.331944	1	1	BDP1
GO:0051099	positive regulation of binding	biological_process	0.331944	1	1	ANXA2
GO:0033570	transferrin transmembrane transporter activity	molecular_function	0.331944	1	1	TFRC
GO:0043194	axon initial segment	cellular_component	0.331944	1	1	CAMK2D
GO:0015093	ferrous iron transmembrane transporter activity	molecular_function	0.331944	1	1	SLC39A14
GO:0035173	histone kinase activity	molecular_function	0.331944	1	1	BAZ1B
GO:0060571	morphogenesis of an epithelial fold	biological_process	0.331944	1	1	AR
GO:0071870	cellular response to catecholamine stimulus	biological_process	0.331944	1	1	NR4A3
GO:2000301	negative regulation of synaptic vesicle exocytosis	biological_process	0.331944	1	1	BRAF
GO:0010725	regulation of primitive erythrocyte differentiation	biological_process	0.331944	1	1	KDM1A
GO:0047499	calcium-independent phospholipase A2 activity	molecular_function	0.331944	1	1	PLA2G7
GO:0031098	stress-activated protein kinase signaling cascade	biological_process	0.331944	1	1	CCDC88C
GO:1990047	spindle matrix	cellular_component	0.331944	1	1	ZNF207
GO:0034417	bisphosphoglycerate 3-phosphatase activity	molecular_function	0.331944	1	1	MINPP1
GO:2000813	negative regulation of barbed-end actin filament capping	biological_process	0.331944	1	1	CARMIL1
GO:0046921	alpha-1->6-fucosyltransferase activity	molecular_function	0.331944	1	1	FUT8
GO:0060633	negative regulation of transcription initiation from RNA polymerase II promoter	biological_process	0.331944	1	1	ZNF451
GO:0070847	core mediator complex	cellular_component	0.331944	1	1	MED14
GO:0006907	pinocytosis	biological_process	0.331944	1	1	SNX5
GO:2000811	negative regulation of anoikis	biological_process	0.331944	1	1	ITGA5
GO:0070898	RNA polymerase III transcriptional preinitiation complex assembly	biological_process	0.331944	1	1	BDP1
GO:0061646	positive regulation of glutamate neurotransmitter secretion in response to membrane depolarization	biological_process	0.331944	1	1	RAB3GAP1
GO:0045124	regulation of bone resorption	biological_process	0.331944	1	1	NF1
GO:0072133	metanephric mesenchyme morphogenesis	biological_process	0.331944	1	1	SMAD4
GO:0033686	positive regulation of luteinizing hormone secretion	biological_process	0.331944	1	1	SMAD4
GO:0060707	trophoblast giant cell differentiation	biological_process	0.331944	1	1	SENP2
GO:0004335	galactokinase activity	molecular_function	0.331944	1	1	GALK2
GO:0051000	positive regulation of nitric-oxide synthase activity	biological_process	0.331944	1	1	SCARB1
GO:0070121	Kupffer's vesicle development	biological_process	0.331944	1	1	AHI1
GO:0009409	response to cold	biological_process	0.331944	1	1	ACADM
GO:0044351	macropinocytosis	biological_process	0.331944	1	1	CARMIL1
GO:2000049	positive regulation of cell-cell adhesion mediated by cadherin	biological_process	0.331944	1	1	DENND6A
GO:0031697	beta-1 adrenergic receptor binding	molecular_function	0.331944	1	1	RAPGEF2
GO:0097499	protein localization to non-motile cilium	biological_process	0.331944	1	1	ARL6
GO:0007028	cytoplasm organization	biological_process	0.331944	1	1	KIF5B
GO:0044292	dendrite terminus	cellular_component	0.331944	1	1	IFT52
GO:0072599	establishment of protein localization to endoplasmic reticulum	biological_process	0.331944	1	1	RYR2
GO:2001034	positive regulation of double-strand break repair via nonhomologous end joining	biological_process	0.331944	1	1	RIF1
GO:1902285	semaphorin-plexin signaling pathway involved in neuron projection guidance	biological_process	0.331944	1	1	NRP1
GO:0071398	cellular response to fatty acid	biological_process	0.331944	1	1	PDK3
GO:0032385	positive regulation of intracellular cholesterol transport	biological_process	0.331944	1	1	PPARG
GO:0061108	seminal vesicle epithelium development	biological_process	0.331944	1	1	SERPINE2
GO:0019835	cytolysis	biological_process	0.331944	1	1	MMD
GO:0090234	regulation of kinetochore assembly	biological_process	0.331944	1	1	RNF4
GO:0034595	phosphatidylinositol phosphate 5-phosphatase activity	molecular_function	0.331944	1	1	INPP5F
GO:0060341	regulation of cellular localization	biological_process	0.331944	1	1	CAMK2D
GO:0001913	T cell mediated cytotoxicity	biological_process	0.331944	1	1	CTSH
GO:0031063	regulation of histone deacetylation	biological_process	0.331944	1	1	TADA2A
GO:0097342	ripoptosome	cellular_component	0.331944	1	1	CFLAR
GO:0031595	nuclear proteasome complex	cellular_component	0.331944	1	1	PSMC6
GO:0097324	melanocyte migration	biological_process	0.331944	1	1	KIT
GO:0046404	ATP-dependent polydeoxyribonucleotide 5'-hydroxyl-kinase activity	molecular_function	0.331944	1	1	N4BP2
GO:0019858	cytosine metabolic process	biological_process	0.331944	1	1	MAPK1
GO:0009444	pyruvate oxidation	biological_process	0.331944	1	1	NR4A3
GO:0010825	positive regulation of centrosome duplication	biological_process	0.331944	1	1	POC1A
GO:1900223	positive regulation of beta-amyloid clearance	biological_process	0.331944	1	1	ABCA7
GO:0039023	pronephric duct morphogenesis	biological_process	0.331944	1	1	AHI1
GO:1904017	cellular response to Thyroglobulin triiodothyronine	NA	0.331944	1	1	NCOA1
GO:0072156	distal tubule morphogenesis	biological_process	0.331944	1	1	KLHL3
GO:0035720	intraciliary anterograde transport	biological_process	0.331944	1	1	IFT52
GO:0031000	response to caffeine	biological_process	0.331944	1	1	RYR2
GO:0086004	regulation of cardiac muscle cell contraction	biological_process	0.331944	1	1	ANK2
GO:0004915	interleukin-6 receptor activity	molecular_function	0.331944	1	1	IL6ST
GO:1903208	negative regulation of hydrogen peroxide-induced neuron death	biological_process	0.331944	1	1	NR4A3
GO:0061308	cardiac neural crest cell development involved in heart development	biological_process	0.331944	1	1	MAPK1
GO:0039689	negative stranded viral RNA replication	biological_process	0.331944	1	1	ATG16L1
GO:0090287	regulation of cellular response to growth factor stimulus	biological_process	0.331944	1	1	FBN2
GO:0030432	peristalsis	biological_process	0.331944	1	1	DLG1
GO:0097197	tetraspanin-enriched microdomain	cellular_component	0.331944	1	1	ADAM10
GO:0060978	angiogenesis involved in coronary vascular morphogenesis	biological_process	0.331944	1	1	NRP1
GO:0045776	negative regulation of blood pressure	biological_process	0.331944	1	1	SCPEP1
GO:0002328	pro-B cell differentiation	biological_process	0.331944	1	1	PRKDC
GO:0001550	ovarian cumulus expansion	biological_process	0.331944	1	1	BMPR1B
GO:0015222	serotonin transmembrane transporter activity	molecular_function	0.331944	1	1	SLC6A4
GO:0070294	renal sodium ion absorption	biological_process	0.331944	1	1	KLHL3
GO:0033700	phospholipid efflux	biological_process	0.331944	1	1	ABCA7
GO:0051781	positive regulation of cell division	biological_process	0.331944	1	1	ENSSSCG00000001695
GO:0002263	cell activation involved in immune response	biological_process	0.331944	1	1	GBF1
GO:0035590	purinergic nucleotide receptor signaling pathway	biological_process	0.331944	1	1	P2RX6
GO:0035493	SNARE complex assembly	biological_process	0.331944	1	1	UVRAG
GO:0001955	blood vessel maturation	biological_process	0.331944	1	1	ANKRD17
GO:0010751	negative regulation of nitric oxide mediated signal transduction	biological_process	0.331944	1	1	THBS1
GO:0019960	C-X3-C chemokine binding	molecular_function	0.331944	1	1	ITGAV
GO:0048179	activin receptor complex	cellular_component	0.331944	1	1	ACVR1
GO:0016361	activin receptor activity, type I	molecular_function	0.331944	1	1	ACVR1
GO:0070890	sodium-dependent L-ascorbate transmembrane transporter activity	molecular_function	0.331944	1	1	SLC23A1
GO:0002159	desmosome assembly	biological_process	0.331944	1	1	PRKCA
GO:0048017	inositol lipid-mediated signaling	biological_process	0.331944	1	1	PLD1
GO:0002551	mast cell chemotaxis	biological_process	0.331944	1	1	KIT
GO:0044319	wound healing, spreading of cells	biological_process	0.331944	1	1	RHOC
GO:0042551	neuron maturation	biological_process	0.331944	1	1	RB1
GO:0044721	protein import into peroxisome matrix, substrate release	biological_process	0.331944	1	1	PEX14
GO:0038154	interleukin-11-mediated signaling pathway	biological_process	0.331944	1	1	IL6ST
GO:0005865	striated muscle thin filament	cellular_component	0.331944	1	1	TMOD3
GO:0045023	G0 to G1 transition	biological_process	0.331944	1	1	MDM4
GO:0032098	regulation of appetite	biological_process	0.331944	1	1	HTR4
GO:0050974	detection of mechanical stimulus involved in sensory perception	biological_process	0.331944	1	1	SERPINE2
GO:0004801	sedoheptulose-7-phosphate:D-glyceraldehyde-3-phosphate glyceronetransferase activity	molecular_function	0.331944	1	1	TALDO1
GO:0030292	protein tyrosine kinase inhibitor activity	molecular_function	0.331944	1	1	IBTK
GO:0031295	T cell costimulation	biological_process	0.331944	1	1	EFNB2
GO:0035048	splicing factor protein import into nucleus	biological_process	0.331944	1	1	TNPO3
GO:0004882	androgen receptor activity	molecular_function	0.331944	1	1	AR
GO:1903375	facioacoustic ganglion development	biological_process	0.331944	1	1	NRP1
GO:0060520	activation of prostate induction by androgen receptor signaling pathway	biological_process	0.331944	1	1	AR
GO:0090169	regulation of spindle assembly	biological_process	0.331944	1	1	RNF4
GO:0097208	alveolar lamellar body	cellular_component	0.331944	1	1	CTSH
GO:2000505	regulation of energy homeostasis	biological_process	0.331944	1	1	NR4A3
GO:0046790	virion binding	molecular_function	0.331944	1	1	HSP90B1
GO:0050998	nitric-oxide synthase binding	molecular_function	0.331944	1	1	SLC6A4
GO:0060363	cranial suture morphogenesis	biological_process	0.331944	1	1	INSIG1
GO:1904750	negative regulation of protein localization to nucleolus	NA	0.331944	1	1	POLR1A
GO:0035507	regulation of myosin-light-chain-phosphatase activity	biological_process	0.331944	1	1	NUAK1
GO:0032421	stereocilium bundle	cellular_component	0.331944	1	1	PCDH15
GO:0030618	transforming growth factor beta receptor, pathway-specific cytoplasmic mediator activity	molecular_function	0.331944	1	1	SMAD2
GO:0034384	high-density lipoprotein particle clearance	biological_process	0.331944	1	1	SCARB1
GO:0001614	purinergic nucleotide receptor activity	molecular_function	0.331944	1	1	P2RX6
GO:0072134	nephrogenic mesenchyme morphogenesis	biological_process	0.331944	1	1	SMAD4
GO:0071109	superior temporal gyrus development	biological_process	0.331944	1	1	GSK3B
GO:0005900	oncostatin-M receptor complex	cellular_component	0.331944	1	1	IL6ST
GO:0048205	COPI coating of Golgi vesicle	biological_process	0.331944	1	1	GBF1
GO:0033184	positive regulation of histone ubiquitination	biological_process	0.331944	1	1	KDM1A
GO:0070670	response to interleukin-4	biological_process	0.331944	1	1	JAK3
GO:1903758	negative regulation of transcription from RNA polymerase II promoter by histone modification	biological_process	0.331944	1	1	ZMYND8
GO:0097443	sorting endosome	cellular_component	0.331944	1	1	NRP1
GO:0001765	membrane raft assembly	biological_process	0.331944	1	1	ANXA2
GO:0042795	snRNA transcription from RNA polymerase II promoter	biological_process	0.331944	1	1	ELL2
GO:0070039	rRNA(guanosine-2'-O--methyltransferase activity)	molecular_function	0.331944	1	1	TARBP1
GO:0035458	cellular response to interferon-beta	biological_process	0.331944	1	1	UBE2K
GO:1905323	telomerase holoenzyme complex assembly	NA	0.331944	1	1	PTGES3
GO:0072579	glycine receptor clustering	biological_process	0.331944	1	1	GPHN
GO:0003985	acetyl-CoA C-acetyltransferase activity	molecular_function	0.331944	1	1	ACAT1
GO:0014067	negative regulation of phosphatidylinositol 3-kinase signaling	biological_process	0.331944	1	1	SERPINE2
GO:0010899	regulation of phosphatidylcholine catabolic process	biological_process	0.331944	1	1	SCARB1
GO:0022843	voltage-gated cation channel activity	molecular_function	0.331944	1	1	PKD2
GO:0045620	negative regulation of lymphocyte differentiation	biological_process	0.331944	1	1	FBXO7
GO:0060749	mammary gland alveolus development	biological_process	0.331944	1	1	AR
GO:0061684	chaperone-mediated autophagy	NA	0.331944	1	1	LAMP2
GO:0001158	enhancer sequence-specific DNA binding	molecular_function	0.331944	1	1	ZNF395
GO:0042249	establishment of planar polarity of embryonic epithelium	biological_process	0.331944	1	1	PAFAH1B1
GO:0035408	histone H3-T6 phosphorylation	biological_process	0.331944	1	1	PRKCA
GO:1903401	L-lysine transmembrane transport	biological_process	0.331944	1	1	PQLC2
GO:0046902	regulation of mitochondrial membrane permeability	biological_process	0.331944	1	1	BNIP3
GO:0001891	phagocytic cup	cellular_component	0.331944	1	1	ABCA7
GO:0035128	post-embryonic forelimb morphogenesis	biological_process	0.331944	1	1	ATRX
GO:0090556	phosphatidylserine-translocating ATPase activity	molecular_function	0.331944	1	1	ABCA7
GO:0071286	cellular response to magnesium ion	biological_process	0.331944	1	1	SLC41A1
GO:0042851	L-alanine metabolic process	biological_process	0.331944	1	1	GPT2
GO:1900112	regulation of histone H3-K9 trimethylation	biological_process	0.331944	1	1	ATRX
GO:0010950	positive regulation of endopeptidase activity	biological_process	0.331944	1	1	PSMD14
GO:0032786	positive regulation of DNA-templated transcription, elongation	biological_process	0.331944	1	1	ERCC6
GO:0060988	lipid tube assembly	biological_process	0.331944	1	1	SNX9
GO:0061357	positive regulation of Wnt protein secretion	biological_process	0.331944	1	1	WLS
GO:0045630	positive regulation of T-helper 2 cell differentiation	biological_process	0.331944	1	1	IL4R
GO:0070899	mitochondrial tRNA wobble uridine modification	biological_process	0.331944	1	1	MTO1
GO:0035265	organ growth	biological_process	0.331944	1	1	SMAD2
GO:0035726	common myeloid progenitor cell proliferation	biological_process	0.331944	1	1	NR4A3
GO:1901076	positive regulation of engulfment of apoptotic cell	biological_process	0.331944	1	1	ABCA7
GO:1905581	positive regulation of low-density lipoprotein particle clearance	NA	0.331944	1	1	ANXA2
GO:0042982	amyloid precursor protein metabolic process	biological_process	0.331944	1	1	DLG1
GO:0060706	cell differentiation involved in embryonic placenta development	biological_process	0.331944	1	1	STK3
GO:0015562	efflux transmembrane transporter activity	molecular_function	0.331944	1	1	XPR1
GO:0016885	ligase activity, forming carbon-carbon bonds	molecular_function	0.331944	1	1	ACAT1
GO:0071850	mitotic cell cycle arrest	biological_process	0.331944	1	1	CDC14A
GO:0051284	positive regulation of sequestering of calcium ion	biological_process	0.331944	1	1	RYR2
GO:0030517	negative regulation of axon extension	biological_process	0.331944	1	1	NRP1
GO:0010754	negative regulation of cGMP-mediated signaling	biological_process	0.331944	1	1	THBS1
GO:0046474	glycerophospholipid biosynthetic process	biological_process	0.331944	1	1	FAR1
GO:1903233	regulation of calcium ion-dependent exocytosis of neurotransmitter	biological_process	0.331944	1	1	RAB3GAP1
GO:0035093	spermatogenesis, exchange of chromosomal proteins	biological_process	0.331944	1	1	PSME4
GO:0034454	microtubule anchoring at centrosome	biological_process	0.331944	1	1	NIN
GO:0032302	MutSbeta complex	cellular_component	0.331944	1	1	MSH3
GO:0034596	phosphatidylinositol phosphate 4-phosphatase activity	molecular_function	0.331944	1	1	INPP5F
GO:0007147	female meiosis II	biological_process	0.331944	1	1	MASTL
GO:0072284	metanephric S-shaped body morphogenesis	biological_process	0.331944	1	1	PKD2
GO:0070671	response to interleukin-12	biological_process	0.331944	1	1	JAK2
GO:0004021	L-alanine:2-oxoglutarate aminotransferase activity	molecular_function	0.331944	1	1	GPT2
GO:0035813	regulation of renal sodium excretion	biological_process	0.331944	1	1	CORIN
GO:0016344	meiotic chromosome movement towards spindle pole	biological_process	0.331944	1	1	ACTR3
GO:0050774	negative regulation of dendrite morphogenesis	biological_process	0.331944	1	1	RAPGEF2
GO:0006788	heme oxidation	biological_process	0.331944	1	1	HMOX2
GO:0030325	adrenal gland development	biological_process	0.331944	1	1	NF1
GO:1905305	negative regulation of cardiac myofibril assembly	NA	0.331944	1	1	SMAD4
GO:0035403	histone kinase activity(H3-T6 specific)	molecular_function	0.331944	1	1	PRKCA
GO:0032184	SUMO polymer binding	molecular_function	0.331944	1	1	RNF111
GO:0002639	positive regulation of immunoglobulin production	biological_process	0.331944	1	1	IL4R
GO:0048148	behavioral response to cocaine	biological_process	0.331944	1	1	HOMER2
GO:0034736	cholesterol O-acyltransferase activity	molecular_function	0.331944	1	1	SOAT1
GO:0008392	arachidonic acid epoxygenase activity	molecular_function	0.331944	1	1	ENSSSCG00000010488
GO:2000670	positive regulation of dendritic cell apoptotic process	biological_process	0.331944	1	1	RAPGEF2
GO:0023035	CD40 signaling pathway	biological_process	0.331944	1	1	ENSSSCG00000002003
GO:0030862	positive regulation of polarized epithelial cell differentiation	biological_process	0.331944	1	1	AHI1
GO:1902275	regulation of chromatin organization	biological_process	0.331944	1	1	MKI67
GO:0005497	androgen binding	molecular_function	0.331944	1	1	AR
GO:0006900	membrane budding	biological_process	0.331944	1	1	ANXA2
GO:0015770	sucrose transport	biological_process	0.331944	1	1	SLC45A4
GO:0048025	negative regulation of mRNA splicing, via spliceosome	biological_process	0.331944	1	1	PTBP1
GO:0071464	cellular response to hydrostatic pressure	biological_process	0.331944	1	1	PKD2
GO:0043291	RAVE complex	cellular_component	0.331944	1	1	DMXL1
GO:0016505	peptidase activator activity involved in apoptotic process	molecular_function	0.331944	1	1	CTSH
GO:0002741	positive regulation of cytokine secretion involved in immune response	biological_process	0.331944	1	1	PTK2
GO:1901981	phosphatidylinositol phosphate binding	molecular_function	0.331944	1	1	ANKFY1
GO:0031642	negative regulation of myelination	biological_process	0.331944	1	1	MTMR2
GO:1902766	skeletal muscle satellite cell migration	biological_process	0.331944	1	1	RHOC
GO:0003341	cilium movement	biological_process	0.331944	1	1	ENSSSCG00000015379
GO:0070506	high-density lipoprotein particle receptor activity	molecular_function	0.331944	1	1	SCARB1
GO:0006082	organic acid metabolic process	biological_process	0.331944	1	1	ACADM
GO:0042711	maternal behavior	biological_process	0.331944	1	1	MBD2
GO:0034440	lipid oxidation	biological_process	0.331944	1	1	PLA2G7
GO:0060317	cardiac epithelial to mesenchymal transition	biological_process	0.331944	1	1	TGFBR1
GO:0034188	apolipoprotein A-I receptor activity	molecular_function	0.331944	1	1	ABCA7
GO:0000738	DNA catabolic process, exonucleolytic	biological_process	0.331944	1	1	XRN2
GO:0030247	polysaccharide binding	molecular_function	0.331944	1	1	AGL
GO:0001768	establishment of T cell polarity	biological_process	0.331944	1	1	MYH9
GO:0098957	anterograde axonal transport of mitochondrion	NA	0.331944	1	1	TRAK1
GO:0097112	gamma-aminobutyric acid receptor clustering	biological_process	0.331944	1	1	GPHN
GO:0000042	protein targeting to Golgi	biological_process	0.331944	1	1	GOLGA4
GO:0033578	protein glycosylation in Golgi	biological_process	0.331944	1	1	FUT8
GO:0046929	negative regulation of neurotransmitter secretion	biological_process	0.331944	1	1	NF1
GO:0006930	substrate-dependent cell migration, cell extension	biological_process	0.331944	1	1	MYH10
GO:0000323	lytic vacuole	cellular_component	0.331944	1	1	UVRAG
GO:1990712	HFE-transferrin receptor complex	NA	0.331944	1	1	TFRC
GO:0044614	nuclear pore cytoplasmic filaments	cellular_component	0.331944	1	1	NUP98
GO:0071392	cellular response to estradiol stimulus	biological_process	0.331944	1	1	NCOA3
GO:0035022	positive regulation of Rac protein signal transduction	biological_process	0.331944	1	1	ARHGEF2
GO:0004859	phospholipase inhibitor activity	molecular_function	0.331944	1	1	ANXA2
GO:0005895	interleukin-5 receptor complex	cellular_component	0.331944	1	1	SDCBP
GO:0005173	stem cell factor receptor binding	molecular_function	0.331944	1	1	SPRED1
GO:0043584	nose development	biological_process	0.331944	1	1	CHD7
GO:0002605	negative regulation of dendritic cell antigen processing and presentation	biological_process	0.331944	1	1	THBS1
GO:0045724	positive regulation of cilium assembly	biological_process	0.331944	1	1	HTT
GO:0044548	S100 protein binding	molecular_function	0.331944	1	1	ANXA2
GO:0005504	fatty acid binding	molecular_function	0.331944	1	1	SH3GLB1
GO:0072219	metanephric cortical collecting duct development	biological_process	0.331944	1	1	PKD2
GO:0050479	glyceryl-ether monooxygenase activity	molecular_function	0.331944	1	1	ENSSSCG00000015356
GO:0071321	cellular response to cGMP	biological_process	0.331944	1	1	RAPGEF2
GO:0005021	vascular endothelial growth factor-activated receptor activity	molecular_function	0.331944	1	1	NRP1
GO:1990111	spermatoproteasome complex	cellular_component	0.331944	1	1	PSME4
GO:0070603	SWI/SNF superfamily-type complex	cellular_component	0.331944	1	1	ATRX
GO:0071802	negative regulation of podosome assembly	biological_process	0.331944	1	1	ARHGEF2
GO:0016830	carbon-carbon lyase activity	molecular_function	0.331944	1	1	ACAT1
GO:0031232	extrinsic component of external side of plasma membrane	cellular_component	0.331944	1	1	SERPINE2
GO:0097374	sensory neuron axon guidance	biological_process	0.331944	1	1	NRP1
GO:0060666	dichotomous subdivision of terminal units involved in salivary gland branching	biological_process	0.331944	1	1	NRP1
GO:0045623	negative regulation of T-helper cell differentiation	biological_process	0.331944	1	1	RC3H1
GO:0006101	citrate metabolic process	biological_process	0.331944	1	1	ACO1
GO:0001920	negative regulation of receptor recycling	biological_process	0.331944	1	1	AP1AR
GO:0001156	TFIIIC-class transcription factor binding	molecular_function	0.331944	1	1	BDP1
GO:0046425	regulation of JAK-STAT cascade	biological_process	0.331944	1	1	PIGU
GO:0010025	wax biosynthetic process	biological_process	0.331944	1	1	FAR1
GO:0043183	vascular endothelial growth factor receptor 1 binding	molecular_function	0.331944	1	1	ENSSSCG00000001695
GO:2000124	regulation of endocannabinoid signaling pathway	biological_process	0.331944	1	1	ABHD6
GO:0031509	telomeric heterochromatin assembly	biological_process	0.331944	1	1	H3F3A
GO:1901800	positive regulation of proteasomal protein catabolic process	biological_process	0.331944	1	1	PSMC6
GO:0050995	negative regulation of lipid catabolic process	biological_process	0.331944	1	1	ACACB
GO:0001533	cornified envelope	cellular_component	0.331944	1	1	DSP
GO:0010637	negative regulation of mitochondrial fusion	biological_process	0.331944	1	1	BNIP3
GO:0002573	myeloid leukocyte differentiation	biological_process	0.331944	1	1	KIT
GO:0097152	mesenchymal cell apoptotic process	biological_process	0.331944	1	1	ETV6
GO:0046322	negative regulation of fatty acid oxidation	biological_process	0.331944	1	1	ACACB
GO:0019102	male somatic sex determination	biological_process	0.331944	1	1	AR
GO:0044268	multicellular organismal protein metabolic process	biological_process	0.331944	1	1	ACACA
GO:0032042	mitochondrial DNA metabolic process	biological_process	0.331944	1	1	PARP1
GO:0004788	thiamine diphosphokinase activity	molecular_function	0.331944	1	1	TPK1
GO:0070973	protein localization to endoplasmic reticulum exit site	biological_process	0.331944	1	1	GBF1
GO:0000103	sulfate assimilation	biological_process	0.331944	1	1	PAPSS2
GO:1901094	negative regulation of protein homotetramerization	biological_process	0.331944	1	1	PEX14
GO:0061312	BMP signaling pathway involved in heart development	biological_process	0.331944	1	1	ACVR1
GO:0042171	lysophosphatidic acid acyltransferase activity	molecular_function	0.331944	1	1	SH3GLB1
GO:0015230	FAD transmembrane transporter activity	molecular_function	0.331944	1	1	SLC25A17
GO:2000303	regulation of ceramide biosynthetic process	biological_process	0.331944	1	1	SAMD8
GO:0043691	reverse cholesterol transport	biological_process	0.331944	1	1	SCARB1
GO:0060429	epithelium development	biological_process	0.331944	1	1	CHD7
GO:0051534	negative regulation of NFAT protein import into nucleus	biological_process	0.331944	1	1	GSK3B
GO:1903919	negative regulation of actin filament severing	NA	0.331944	1	1	MYH9
GO:0070904	transepithelial L-ascorbic acid transport	biological_process	0.331944	1	1	SLC23A1
GO:0015229	L-ascorbic acid transporter activity	molecular_function	0.331944	1	1	SLC23A1
GO:0036486	ventral trunk neural crest cell migration	biological_process	0.331944	1	1	NRP1
GO:0042832	defense response to protozoan	biological_process	0.331944	1	1	IL4R
GO:0071008	U2-type post-mRNA release spliceosomal complex	cellular_component	0.331944	1	1	DHX15
GO:0034374	low-density lipoprotein particle remodeling	biological_process	0.331944	1	1	PLA2G7
GO:0030670	phagocytic vesicle membrane	cellular_component	0.331944	1	1	LAMP2
GO:0070129	regulation of mitochondrial translation	biological_process	0.331944	1	1	LRPPRC
GO:2001023	regulation of response to drug	biological_process	0.331944	1	1	GABRA4
GO:0005689	U12-type spliceosomal complex	cellular_component	0.331944	1	1	DHX15
GO:0071404	cellular response to low-density lipoprotein particle stimulus	biological_process	0.331944	1	1	NPC1
GO:0034634	glutathione transmembrane transporter activity	molecular_function	0.331944	1	1	ABCC1
GO:0038097	positive regulation of mast cell activation by Fc-epsilon receptor signaling pathway	biological_process	0.331944	1	1	NR4A3
GO:0019887	protein kinase regulator activity	molecular_function	0.331944	1	1	ENSSSCG00000009898
GO:0045505	dynein intermediate chain binding	molecular_function	0.331944	1	1	HTT
GO:0016785	transferase activity, transferring selenium-containing groups	molecular_function	0.331944	1	1	ENSSSCG00000025315
GO:0009931	calcium-dependent protein serine/threonine kinase activity	molecular_function	0.331944	1	1	MKNK1
GO:0006550	isoleucine catabolic process	biological_process	0.331944	1	1	ACAT1
GO:0007182	common-partner SMAD protein phosphorylation	biological_process	0.331944	1	1	SMAD2
GO:0031821	G-protein coupled serotonin receptor binding	molecular_function	0.331944	1	1	GNAI1
GO:0006659	phosphatidylserine biosynthetic process	biological_process	0.331944	1	1	PTDSS1
GO:0097322	7SK snRNA binding	molecular_function	0.331944	1	1	DDX21
GO:1903076	regulation of protein localization to plasma membrane	biological_process	0.331944	1	1	PPARG
GO:0034398	telomere tethering at nuclear periphery	biological_process	0.331944	1	1	NUP98
GO:0001547	antral ovarian follicle growth	biological_process	0.331944	1	1	FOXO3
GO:0000028	ribosomal small subunit assembly	biological_process	0.331944	1	1	RPS10
GO:0046368	GDP-L-fucose metabolic process	biological_process	0.331944	1	1	FUT8
GO:0003360	brainstem development	biological_process	0.331944	1	1	SMAD4
GO:0031597	cytosolic proteasome complex	cellular_component	0.331944	1	1	PSMC6
GO:0043112	receptor metabolic process	biological_process	0.331944	1	1	FUT8
GO:0035502	metanephric part of ureteric bud development	biological_process	0.331944	1	1	PKD2
GO:0021860	pyramidal neuron development	biological_process	0.331944	1	1	OGDH
GO:0004649	polyADP-ribose glycohydrolase activity	molecular_function	0.331944	1	1	PARG
GO:0035810	positive regulation of urine volume	biological_process	0.331944	1	1	SHAS2
GO:2000679	positive regulation of transcription regulatory region DNA binding	biological_process	0.331944	1	1	RB1
GO:0018393	internal peptidyl-lysine acetylation	biological_process	0.331944	1	1	EP300
GO:0006597	spermine biosynthetic process	biological_process	0.331944	1	1	SMS
GO:0043623	cellular protein complex assembly	biological_process	0.331944	1	1	MBD2
GO:0004634	phosphopyruvate hydratase activity	molecular_function	0.331944	1	1	ENO1
GO:1903778	protein localization to vacuolar membrane	NA	0.331944	1	1	SH3GLB1
GO:0015228	coenzyme A transmembrane transporter activity	molecular_function	0.331944	1	1	SLC25A17
GO:0004866	endopeptidase inhibitor activity	molecular_function	0.331944	1	1	CD109
GO:0043560	insulin receptor substrate binding	molecular_function	0.331944	1	1	IGF1R
GO:0001738	morphogenesis of a polarized epithelium	biological_process	0.331944	1	1	AHI1
GO:1902219	negative regulation of intrinsic apoptotic signaling pathway in response to osmotic stress	biological_process	0.331944	1	1	YBX3
GO:0086073	bundle of His cell-Purkinje myocyte adhesion involved in cell communication	biological_process	0.331944	1	1	DSP
GO:0015920	lipopolysaccharide transport	biological_process	0.331944	1	1	SCARB1
GO:0005335	serotonin:sodium symporter activity	molecular_function	0.331944	1	1	SLC6A4
GO:0002327	immature B cell differentiation	biological_process	0.331944	1	1	KIT
GO:0005324	long-chain fatty acid transporter activity	molecular_function	0.331944	1	1	ABCD3
GO:0060346	bone trabecula formation	biological_process	0.331944	1	1	FBN2
GO:2000642	negative regulation of early endosome to late endosome transport	biological_process	0.331944	1	1	SNX12
GO:0052658	inositol-1,4,5-trisphosphate 5-phosphatase activity	molecular_function	0.331944	1	1	INPP5B
GO:0050862	positive regulation of T cell receptor signaling pathway	biological_process	0.331944	1	1	PRKD2
GO:0015267	channel activity	molecular_function	0.331944	1	1	PKD2
GO:0051638	barbed-end actin filament uncapping	biological_process	0.331944	1	1	CARMIL1
GO:0051797	regulation of hair follicle development	biological_process	0.331944	1	1	SMAD4
GO:0005883	neurofilament	cellular_component	0.331944	1	1	NRP1
GO:0035350	FAD transmembrane transport	biological_process	0.331944	1	1	SLC25A17
GO:0031247	actin rod assembly	biological_process	0.331944	1	1	HSP90B1
GO:2001259	positive regulation of cation channel activity	biological_process	0.331944	1	1	CTSS
GO:0001519	peptide amidation	biological_process	0.331944	1	1	PAM
GO:0031416	NatB complex	cellular_component	0.331944	1	1	NAA25
GO:0005249	voltage-gated potassium channel activity	molecular_function	0.331944	1	1	ENSSSCG00000026527
GO:0016095	polyprenol catabolic process	biological_process	0.331944	1	1	SRD5A3
GO:0001147	transcription termination site sequence-specific DNA binding	molecular_function	0.331944	1	1	XRN2
GO:0097159	organic cyclic compound binding	molecular_function	0.331944	1	1	RYR2
GO:0051660	establishment of centrosome localization	biological_process	0.331944	1	1	DLG1
GO:0005127	ciliary neurotrophic factor receptor binding	molecular_function	0.331944	1	1	IL6ST
GO:2001028	positive regulation of endothelial cell chemotaxis	biological_process	0.331944	1	1	PRKD2
GO:0032369	negative regulation of lipid transport	biological_process	0.331944	1	1	ITGAV
GO:1903572	positive regulation of protein kinase D signaling	biological_process	0.331944	1	1	ENSSSCG00000001695
GO:0031666	positive regulation of lipopolysaccharide-mediated signaling pathway	biological_process	0.331944	1	1	PRKCA
GO:1905007	positive regulation of epithelial to mesenchymal transition involved in endocardial cushion formation	NA	0.331944	1	1	ACVR1
GO:0004020	adenylylsulfate kinase activity	molecular_function	0.331944	1	1	PAPSS2
GO:0097635	extrinsic component of autophagosome membrane	cellular_component	0.331944	1	1	WDFY3
GO:0050730	regulation of peptidyl-tyrosine phosphorylation	biological_process	0.331944	1	1	PRKCE
GO:0060956	endocardial cell differentiation	biological_process	0.331944	1	1	SMAD4
GO:0006991	response to sterol depletion	biological_process	0.331944	1	1	INSIG1
GO:0035526	retrograde transport, plasma membrane to Golgi	biological_process	0.331944	1	1	USP6NL
GO:1900118	negative regulation of execution phase of apoptosis	biological_process	0.331944	1	1	FZD3
GO:0035313	wound healing, spreading of epidermal cells	biological_process	0.331944	1	1	ITGA5
GO:0021678	third ventricle development	biological_process	0.331944	1	1	MYH10
GO:0006094	gluconeogenesis	biological_process	0.331944	1	1	GPI
GO:0098914	membrane repolarization during atrial cardiac muscle cell action potential	biological_process	0.331944	1	1	KCNN2
GO:0050996	positive regulation of lipid catabolic process	biological_process	0.331944	1	1	PRKCE
GO:0019674	NAD metabolic process	biological_process	0.331944	1	1	NADK2
GO:0042987	amyloid precursor protein catabolic process	biological_process	0.331944	1	1	PSEN1
GO:0021785	branchiomotor neuron axon guidance	biological_process	0.331944	1	1	NRP1
GO:0035021	negative regulation of Rac protein signal transduction	biological_process	0.331944	1	1	NF1
GO:0035276	ethanol binding	molecular_function	0.331944	1	1	PRKCE
GO:0038165	oncostatin-M-mediated signaling pathway	biological_process	0.331944	1	1	IL6ST
GO:0035349	coenzyme A transmembrane transport	biological_process	0.331944	1	1	SLC25A17
GO:0097491	sympathetic neuron projection guidance	biological_process	0.331944	1	1	NRP1
GO:0060754	positive regulation of mast cell chemotaxis	biological_process	0.331944	1	1	ENSSSCG00000001695
GO:0086048	membrane depolarization during bundle of His cell action potential	biological_process	0.331944	1	1	CACNA2D1
GO:0001927	exocyst assembly	biological_process	0.331944	1	1	EXOC2
GO:0008215	spermine metabolic process	biological_process	0.331944	1	1	SMS
GO:0031251	PAN complex	cellular_component	0.331944	1	1	PAN3
GO:0030160	GKAP/Homer scaffold activity	molecular_function	0.331944	1	1	HOMER2
GO:0002581	negative regulation of antigen processing and presentation of peptide or polysaccharide antigen via MHC class II	biological_process	0.331944	1	1	THBS1
GO:0061689	tricellular tight junction	NA	0.331944	1	1	MARVELD2
GO:0004347	glucose-6-phosphate isomerase activity	molecular_function	0.331944	1	1	GPI
GO:0017125	deoxycytidyl transferase activity	molecular_function	0.331944	1	1	REV1
GO:0050062	long-chain-fatty-acyl-CoA reductase activity	molecular_function	0.331944	1	1	FAR1
GO:0043293	apoptosome	cellular_component	0.331944	1	1	ENSSSCG00000000884
GO:1905337	positive regulation of aggrephagy	NA	0.331944	1	1	HTT
GO:0003994	aconitate hydratase activity	molecular_function	0.331944	1	1	ACO1
GO:0001544	initiation of primordial ovarian follicle growth	biological_process	0.331944	1	1	FOXO3
GO:0090219	negative regulation of lipid kinase activity	biological_process	0.331944	1	1	PPP2R5A
GO:0007608	sensory perception of smell	biological_process	0.331944	1	1	ADCY3
GO:1903874	ferrous iron transmembrane transport	NA	0.331944	1	1	SLC39A14
GO:0035692	macrophage migration inhibitory factor receptor complex	cellular_component	0.331944	1	1	CD44
GO:1903358	regulation of Golgi organization	biological_process	0.331944	1	1	USP6NL
GO:0071459	protein localization to chromosome, centromeric region	biological_process	0.331944	1	1	RB1
GO:0005896	interleukin-6 receptor complex	cellular_component	0.331944	1	1	IL6ST
GO:0051427	hormone receptor binding	molecular_function	0.331944	1	1	NCOA6
GO:0070085	glycosylation	biological_process	0.331944	1	1	COG6
GO:0060923	cardiac muscle cell fate commitment	biological_process	0.331944	1	1	ACVR1
GO:1901582	positive regulation of telomeric RNA transcription from RNA pol II promoter	biological_process	0.331944	1	1	ATRX
GO:0044803	multi-organism membrane organization	biological_process	0.331944	1	1	PI4KA
[truncated: 2,094 more rows]

## Sheet: GO analysis in oocyte
Supplementary Table 6. GO analysis of host genes producing DECs in oocytes.
GO ID	GO term	GO classification	Corrected P-value	Diff Genes #	Background Genes #	Involved Genes
GO:0055085	transmembrane transport	biological_process	1.5446e-07	16	81	ABCB4;ABCC2;ENSSSCG00000007848;ENSSSCG00000026730;ITPR3;RYR1;RYR2;SLC17A1;SLC25A13;SLC25A24;SLC41A2;SLC8B1;SLC9B1;SVOPL;TRPC4;TRPM3
GO:0034587	piRNA metabolic process	biological_process	7.59428e-05	3	3	FKBP6;PIWIL2;TDRD9
GO:0005509	calcium ion binding	molecular_function	0.000149469	13	95	CAPS2;EFCAB5;EGFLAM;ENSSSCG00000028341;ITPR3;MELK;MMP25;MYO5A;PCDH15;RYR1;RYR2;SLC25A13;SLC25A24
GO:0015278	calcium-release channel activity	molecular_function	0.000294263	3	4	ITPR3;RYR1;RYR2
GO:0070588	calcium ion transmembrane transport	biological_process	0.000383872	6	24	ENSSSCG00000027898;ITPR3;RYR1;RYR2;SLC8B1;TRPC4
GO:0016021	integral component of membrane	cellular_component	0.000418933	43	624	ABCB4;ABCC2;ATP1A3;ATP6V0A4;ATRNL1;CALCR;CHL1;CORIN;DCT;ENSSSCG00000006989;ENSSSCG00000007733;ENSSSCG00000007848;ENSSSCG00000016073;ENSSSCG00000024299;ENSSSCG00000026730;ENSSSCG00000027898;ENSSSCG00000028341;GABBR1;ITGA6;ITPR3;KCNN3;KIAA1324L;MBOAT1;MMP25;NAALAD2;PCDH15;RYR1;RYR2;SLC17A1;SLC25A13;SLC25A24;SLC35F4;SLC41A2;SLC8B1;SLC9B1;SOAT1;SORCS1;SVOPL;TENM2;THSD7A;TRPC4;TRPM3;ZP4
GO:0006811	ion transport	biological_process	0.00058762	8	46	ATP1A3;ATP6V0A4;ENSSSCG00000027898;ITPR3;RYR1;RYR2;TRPC4;TRPM3
GO:0043046	DNA methylation involved in gamete generation	biological_process	0.000712675	3	5	FKBP6;PIWIL2;TDRD9
GO:0005216	ion channel activity	molecular_function	0.00121008	5	20	ITPR3;RYR1;RYR2;TRPC4;TRPM3
GO:0007143	female meiotic division	biological_process	0.00180639	2	2	SYCP2;WEE2
GO:0042476	odontogenesis	biological_process	0.00180639	2	2	LAMB1;MYO5A
GO:0043186	P granule	cellular_component	0.00180639	2	2	PIWIL2;TDRD9
GO:0060402	calcium ion transport into cytosol	biological_process	0.00180639	2	2	ITPR3;RYR2
GO:0071313	cellular response to caffeine	biological_process	0.00180639	2	2	RYR1;RYR2
GO:0014808	release of sequestered calcium ion into cytosol by sarcoplasmic reticulum	biological_process	0.00180639	2	2	RYR1;RYR2
GO:0042438	melanin biosynthetic process	biological_process	0.00180639	2	2	DCT;MYO5A
GO:0005219	ryanodine-sensitive calcium-release channel activity	molecular_function	0.00180639	2	2	RYR1;RYR2
GO:2000360	negative regulation of binding of sperm to zona pellucida	biological_process	0.00180639	2	2	ASTL;ZP4
GO:0005432	calcium:sodium antiporter activity	molecular_function	0.00180639	2	2	CAPS2;SLC8B1
GO:0098793	presynapse	NA	0.00234138	3	7	ENSSSCG00000028341;GABBR1;UNC13C
GO:0009566	fertilization	biological_process	0.00234138	3	7	ASTL;SYCP2;TDRD9
GO:0005578	proteinaceous extracellular matrix	cellular_component	0.00289105	5	24	ADAMTS7;EGFLAM;ENSSSCG00000002341;TECTA;ZP4
GO:0005262	calcium channel activity	molecular_function	0.00299284	4	15	ITPR3;RYR1;RYR2;TRPC4
GO:0008233	peptidase activity	molecular_function	0.0033059	7	47	ADAMTS7;ASTL;ENSSSCG00000000540;ENSSSCG00000002341;MMP25;NAALAD2;TMPRSS15
GO:0042626	ATPase activity, coupled to transmembrane movement of substances	molecular_function	0.00385998	4	16	ABCB4;ABCC2;ENSSSCG00000007848;ENSSSCG00000026730
GO:0006816	calcium ion transport	biological_process	0.00385998	4	16	ENSSSCG00000027898;ITPR3;RYR1;RYR2
GO:0070679	inositol 1,4,5 trisphosphate binding	molecular_function	0.0052673	2	3	ITPR3;TRPC4
GO:0030041	actin filament polymerization	biological_process	0.0052673	2	3	ENSSSCG00000015632;ENSSSCG00000025598
GO:0048763	calcium-induced calcium release activity	molecular_function	0.0052673	2	3	RYR1;RYR2
GO:0016079	synaptic vesicle exocytosis	biological_process	0.0052673	2	3	CADPS2;UNC13C
GO:0046581	intercellular canaliculus	cellular_component	0.0052673	2	3	ABCB4;ABCC2
GO:0008631	intrinsic apoptotic signaling pathway in response to oxidative stress	biological_process	0.0052673	2	3	ENSSSCG00000026041;MELK
GO:0048066	developmental pigmentation	biological_process	0.0052673	2	3	DCT;MYO5A
GO:0005768	endosome	cellular_component	0.00624398	6	40	ATP6V0A4;BIRC6;DOPEY1;DOPEY2;ENSSSCG00000006877;VPS26A
GO:0006810	transport	biological_process	0.00663952	13	142	ABCB4;ABCC2;ATP1A3;ATP6V0A4;ENSSSCG00000007848;ENSSSCG00000026730;ENSSSCG00000027898;KPNA7;MYO5A;SLC25A13;SLC25A24;SLC35F4;SORCS1
GO:0006814	sodium ion transport	biological_process	0.007304	3	10	ATP1A3;ENSSSCG00000024299;SLC9B1
GO:0051209	release of sequestered calcium ion into cytosol	biological_process	0.007304	3	10	ITPR3;RYR1;RYR2
GO:0031175	neuron projection development	biological_process	0.00900033	4	20	CHL1;ENSSSCG00000009337;LAMB1;WASF1
GO:0006508	proteolysis	biological_process	0.00992439	10	101	ADAMTS7;ASTL;CORIN;ENSSSCG00000000540;ENSSSCG00000002341;MMP25;NAALAD2;PAPPA2;SENP7;TMPRSS15
GO:0051480	regulation of cytosolic calcium ion concentration	biological_process	0.0102403	2	4	SLC8B1;TRPC4
GO:0034704	calcium channel complex	cellular_component	0.0102403	2	4	RYR2;TRPC4
GO:0007035	vacuolar acidification	biological_process	0.0102403	2	4	ATP6V0A4;DMXL1
GO:0033017	sarcoplasmic reticulum membrane	cellular_component	0.0102403	2	4	RYR1;RYR2
GO:0006754	ATP biosynthetic process	biological_process	0.0102403	2	4	LDHC;SLC25A13
GO:0042734	presynaptic membrane	cellular_component	0.0102403	2	4	CADPS2;GABBR1
GO:0031047	gene silencing by RNA	biological_process	0.0102403	2	4	FKBP6;PIWIL2
GO:0070072	vacuolar proton-transporting V-type ATPase complex assembly	biological_process	0.0102403	2	4	ATP6V0A4;DMXL1
GO:0000795	synaptonemal complex	cellular_component	0.0102403	2	4	FKBP6;SYCP2
GO:0060048	cardiac muscle contraction	biological_process	0.0102403	2	4	ATP1A3;RYR2
GO:0051592	response to calcium ion	biological_process	0.0102403	2	4	ITPR3;SLC25A13
GO:0003785	actin monomer binding	molecular_function	0.0102403	2	4	ENSSSCG00000015632;ENSSSCG00000025598
GO:0008237	metallopeptidase activity	molecular_function	0.0104188	5	32	ADAMTS7;ASTL;ENSSSCG00000002341;MMP25;PAPPA2
GO:0006812	cation transport	biological_process	0.0125775	3	12	SLC41A2;SLC9B1;TRPM3
GO:0005604	basement membrane	cellular_component	0.0125775	3	12	EGFLAM;ITGA6;LAMB1
GO:0007601	visual perception	biological_process	0.015848	3	13	MYO5A;PCDH15;PDE6C
GO:0035725	sodium ion transmembrane transport	biological_process	0.015848	3	13	CAPS2;SLC17A1;SLC8B1
GO:0007140	male meiosis	biological_process	0.0165921	2	5	SYCP2;TDRD9
GO:0071277	cellular response to calcium ion	biological_process	0.0165921	2	5	GPLD1;SLC25A24
GO:0051639	actin filament network formation	biological_process	0.0165921	2	5	ENSSSCG00000015632;ENSSSCG00000025598
GO:0005938	cell cortex	cellular_component	0.0195514	3	14	ENSSSCG00000009337;MELK;RYR1
GO:0004930	G-protein coupled receptor activity	molecular_function	0.0195514	3	14	CALCR;GABBR1;SENP7
GO:0005516	calmodulin binding	molecular_function	0.023691	3	15	KCNN3;MYO5A;RYR2
GO:0098655	cation transmembrane transport	biological_process	0.0241977	2	6	SLC41A2;TRPM3
GO:0016020	membrane	cellular_component	0.0290799	50	928	ABCB4;ABCC2;ATP1A3;ATP6V0A4;ATRNL1;BIRC6;CALCR;CHL1;CORIN;DCT;ENSSSCG00000006989;ENSSSCG00000007733;ENSSSCG00000007848;ENSSSCG00000016073;ENSSSCG00000024299;ENSSSCG00000026730;ENSSSCG00000027898;ENSSSCG00000028341;GABBR1;HBS1L;ITGA6;ITPR3;KCNN3;KIAA1324L;MBOAT1;MELK;MSH3;MYO5A;NAALAD2;OFD1;PAPOLG;PCDH15;RYR1;RYR2;SLC17A1;SLC25A13;SLC25A24;SLC35F4;SLC41A2;SLC8B1;SLC9B1;SOAT1;SORCS1;SVOPL;TENM2;THS…
GO:0005929	cilium	cellular_component	0.0328365	4	29	CALCR;IFT52;LDHC;OFD1
GO:0016810	hydrolase activity, acting on carbon-nitrogen (but not peptide bonds))	molecular_function	0.0329402	1	7	DPYS
GO:0006895	Golgi to endosome transport	biological_process	0.0329402	2	7	DOPEY1;DOPEY2
GO:0042470	melanosome	cellular_component	0.0329402	2	7	DCT;MYO5A
GO:0004709	MAP kinase kinase kinase activity	molecular_function	0.0329402	2	7	ENSSSCG00000026041;MAP3K15
GO:0006813	potassium ion transport	biological_process	0.0329402	2	7	ATP1A3;KCNN3
GO:0016529	sarcoplasmic reticulum	cellular_component	0.0329402	2	7	RYR1;RYR2
GO:0005790	smooth endoplasmic reticulum	cellular_component	0.0329402	2	7	RYR1;RYR2
GO:0030317	flagellated sperm motility	biological_process	0.0329402	2	7	LDHC;NEURL1
GO:0004252	serine-type endopeptidase activity	molecular_function	0.0332783	3	17	CORIN;ENSSSCG00000000540;TMPRSS15
GO:0005887	integral component of plasma membrane	cellular_component	0.0365322	7	74	ABCC2;GABBR1;ITPR3;PCDH15;SLC17A1;TENM2;TRPC4
GO:0016604	nuclear body	cellular_component	0.0379515	6	59	CORIN;ESRP1;FANCD2;GTF2B;PAPOLG;ZFHX3
GO:0019898	extrinsic component of membrane	cellular_component	0.0387194	3	18	ATG2B;ENSSSCG00000006877;ENSSSCG00000028341
GO:0005576	extracellular region	cellular_component	0.0407597	4	31	GPLD1;PCOLCE2;TECTA;ZP4
GO:0004222	metalloendopeptidase activity	molecular_function	0.0407597	4	31	ADAMTS7;ASTL;ENSSSCG00000002341;MMP25
GO:0050129	N-formylglutamate deformylase activity	molecular_function	0.0426555	1	1	NAALAD2
GO:0044305	calyx of Held	cellular_component	0.0426555	1	1	UNC13C
GO:0005614	interstitial matrix	cellular_component	0.0426555	1	1	EGFLAM
GO:0070001	aspartic-type peptidase activity	molecular_function	0.0426555	1	1	ASTL
GO:0060401	cytosolic calcium ion transport	biological_process	0.0426555	1	1	RYR2
GO:0051643	endoplasmic reticulum localization	biological_process	0.0426555	1	1	MYO5A
GO:0043551	regulation of phosphatidylinositol 3-kinase activity	biological_process	0.0426555	1	1	ENSSSCG00000003909
GO:0006269	DNA replication, synthesis of RNA primer	biological_process	0.0426555	1	1	ENSSSCG00000001493
GO:0010460	positive regulation of heart rate	biological_process	0.0426555	1	1	RYR2
GO:0010668	ectodermal cell differentiation	biological_process	0.0426555	1	1	ITGA6
GO:0010370	perinucleolar chromocenter	cellular_component	0.0426555	1	1	PIWIL2
GO:0031668	cellular response to extracellular stimulus	biological_process	0.0426555	1	1	ITGA6
GO:0004157	dihydropyrimidinase activity	molecular_function	0.0426555	1	1	DPYS
GO:0035014	phosphatidylinositol 3-kinase regulator activity	molecular_function	0.0426555	1	1	ENSSSCG00000003909
GO:0042759	long-chain fatty acid biosynthetic process	biological_process	0.0426555	1	1	MYO5A
GO:0045793	positive regulation of cell size	biological_process	0.0426555	1	1	AKT3
GO:0060631	regulation of meiosis I	biological_process	0.0426555	1	1	WEE2
GO:1990923	PET complex	NA	0.0426555	1	1	PIWIL2
GO:0043570	maintenance of DNA repeat elements	biological_process	0.0426555	1	1	MSH3
GO:2000827	mitochondrial RNA surveillance	biological_process	0.0426555	1	1	SUPV3L1
GO:0003050	regulation of systemic arterial blood pressure by atrial natriuretic peptide	biological_process	0.0426555	1	1	CORIN
GO:2000344	positive regulation of acrosome reaction	biological_process	0.0426555	1	1	ZP4
GO:0032181	dinucleotide repeat insertion binding	molecular_function	0.0426555	1	1	MSH3
GO:0018208	peptidyl-proline modification	biological_process	0.0426555	1	1	FKBP6
GO:0021812	neuronal-glial interaction involved in cerebral cortex radial glia guided migration	biological_process	0.0426555	1	1	LAMB1
GO:0034458	3'-5' RNA helicase activity	molecular_function	0.0426555	1	1	SUPV3L1
GO:0043931	ossification involved in bone maturation	biological_process	0.0426555	1	1	RYR1
GO:0006583	melanin biosynthetic process from tyrosine	biological_process	0.0426555	1	1	DCT
GO:0016048	detection of temperature stimulus	biological_process	0.0426555	1	1	TRPM3
GO:0008374	O-acyltransferase activity	molecular_function	0.0426555	1	1	SOAT1
GO:0034435	cholesterol esterification	biological_process	0.0426555	1	1	SOAT1
GO:0017158	regulation of calcium ion-dependent exocytosis	biological_process	0.0426555	1	1	ENSSSCG00000028341
GO:2001140	positive regulation of phospholipid transport	biological_process	0.0426555	1	1	ABCB4
GO:1901557	response to fenofibrate	biological_process	0.0426555	1	1	ABCB4
GO:0086037	sodium:potassium-exchanging ATPase activity involved in regulation of cardiac muscle cell membrane potential	molecular_function	0.0426555	1	1	ATP1A3
GO:0000962	positive regulation of mitochondrial RNA catabolic process	biological_process	0.0426555	1	1	SUPV3L1
GO:0046935	1-phosphatidylinositol-3-kinase regulator activity	molecular_function	0.0426555	1	1	ENSSSCG00000003909
GO:0003956	NADP+-protein-arginine ADP-ribosyltransferase activity	molecular_function	0.0426555	1	1	ART3
GO:0004167	dopachrome isomerase activity	molecular_function	0.0426555	1	1	DCT
GO:0042986	positive regulation of amyloid precursor protein biosynthetic process	biological_process	0.0426555	1	1	SOAT1
GO:0014051	gamma-aminobutyric acid secretion	biological_process	0.0426555	1	1	TRPC4
GO:0060473	cortical granule	cellular_component	0.0426555	1	1	ASTL
GO:0000958	mitochondrial mRNA catabolic process	biological_process	0.0426555	1	1	SUPV3L1
GO:0060468	prevention of polyspermy	biological_process	0.0426555	1	1	ASTL
GO:1901896	positive regulation of calcium-transporting ATPase activity	biological_process	0.0426555	1	1	RYR2
GO:0003300	cardiac muscle hypertrophy	biological_process	0.0426555	1	1	RYR2
GO:0086029	Purkinje myocyte to ventricular cardiac muscle cell signaling	biological_process	0.0426555	1	1	RYR2
GO:0038037	G-protein coupled receptor dimeric complex	cellular_component	0.0426555	1	1	GABBR1
GO:0006952	defense response	biological_process	0.0426555	1	1	PCYT1B
GO:0098735	positive regulation of the force of heart contraction	biological_process	0.0426555	1	1	RYR2
GO:0060903	positive regulation of meiosis I	biological_process	0.0426555	1	1	PIWIL2
GO:0006582	melanin metabolic process	biological_process	0.0426555	1	1	MYO5A
GO:0002922	positive regulation of humoral immune response	biological_process	0.0426555	1	1	ZP4
GO:0086036	regulation of cardiac muscle cell membrane potential	biological_process	0.0426555	1	1	ATP1A3
GO:0003896	DNA primase activity	molecular_function	0.0426555	1	1	ENSSSCG00000001493
GO:0007603	phototransduction, visible light	biological_process	0.0426555	1	1	PDE6C
GO:0006507	GPI anchor release	biological_process	0.0426555	1	1	GPLD1
GO:0005607	laminin-2 complex	cellular_component	0.0426555	1	1	LAMB1
GO:0070528	protein kinase C signaling	biological_process	0.0426555	1	1	ZP4
GO:0097050	type B pancreatic cell apoptotic process	biological_process	0.0426555	1	1	RYR2
GO:0072673	lamellipodium morphogenesis	biological_process	0.0426555	1	1	WASF1
GO:0045910	negative regulation of DNA recombination	biological_process	0.0426555	1	1	MSH3
GO:0035735	intraciliary transport involved in cilium assembly	biological_process	0.0426555	1	1	CEP131
GO:0006883	cellular sodium ion homeostasis	biological_process	0.0426555	1	1	ATP1A3
GO:0046549	retinal cone cell development	biological_process	0.0426555	1	1	PDE6C
GO:0071467	cellular response to pH	biological_process	0.0426555	1	1	GPLD1
GO:0071174	mitotic spindle checkpoint	biological_process	0.0426555	1	1	CSNK2A2
GO:0015813	L-glutamate transport	biological_process	0.0426555	1	1	SLC25A13
GO:0034584	piRNA binding	molecular_function	0.0426555	1	1	PIWIL2
GO:0019211	phosphatase activator activity	molecular_function	0.0426555	1	1	GTF2F1
GO:0046540	U4/U6 x U5 tri-snRNP complex	cellular_component	0.0426555	1	1	ENSSSCG00000030119
GO:0010941	regulation of cell death	biological_process	0.0426555	1	1	SLC25A24
GO:0001964	startle response	biological_process	0.0426555	1	1	PCDH15
GO:0043259	laminin-10 complex	cellular_component	0.0426555	1	1	LAMB1
GO:0010878	cholesterol storage	biological_process	0.0426555	1	1	SOAT1
GO:0050951	sensory perception of temperature stimulus	biological_process	0.0426555	1	1	TRPM3
GO:0035946	mitochondrial mRNA surveillance	biological_process	0.0426555	1	1	SUPV3L1
GO:1903413	cellular response to bile acid	biological_process	0.0426555	1	1	ABCB4
GO:0006892	post-Golgi vesicle-mediated transport	biological_process	0.0426555	1	1	MYO5A
GO:0032139	dinucleotide insertion or deletion binding	molecular_function	0.0426555	1	1	MSH3
GO:0038039	G-protein coupled receptor heterodimeric complex	cellular_component	0.0426555	1	1	GABBR1
GO:0035038	female pronucleus assembly	biological_process	0.0426555	1	1	WEE2
GO:0007565	female pregnancy	biological_process	0.0426555	1	1	CORIN
GO:0032142	single guanine insertion binding	molecular_function	0.0426555	1	1	MSH3
GO:0004772	sterol O-acyltransferase activity	molecular_function	0.0426555	1	1	SOAT1
GO:0005606	laminin-1 complex	cellular_component	0.0426555	1	1	LAMB1
GO:0000120	RNA polymerase I transcription factor complex	cellular_component	0.0426555	1	1	TAF1A
GO:0019244	lactate biosynthetic process from pyruvate	biological_process	0.0426555	1	1	LDHC
GO:0032376	positive regulation of cholesterol transport	biological_process	0.0426555	1	1	ABCB4
GO:0098904	regulation of AV node cell action potential	biological_process	0.0426555	1	1	RYR2
GO:1990504	dense core granule exocytosis	biological_process	0.0426555	1	1	CADPS2
GO:0048170	positive regulation of long-term neuronal synaptic plasticity	biological_process	0.0426555	1	1	NEURL1
GO:0043257	laminin-8 complex	cellular_component	0.0426555	1	1	LAMB1
GO:0031585	regulation of inositol 1,4,5-trisphosphate-sensitive calcium-release channel activity	biological_process	0.0426555	1	1	MYO5A
GO:0050973	detection of mechanical stimulus involved in equilibrioception	biological_process	0.0426555	1	1	PCDH15
GO:0005513	detection of calcium ion	biological_process	0.0426555	1	1	RYR2
GO:0019516	lactate oxidation	biological_process	0.0426555	1	1	LDHC
GO:0004965	G-protein coupled GABA receptor activity	molecular_function	0.0426555	1	1	GABBR1
GO:1900076	regulation of cellular response to insulin stimulus	biological_process	0.0426555	1	1	GPLD1
GO:0036376	sodium ion export from cell	biological_process	0.0426555	1	1	ATP1A3
GO:0071547	piP-body	cellular_component	0.0426555	1	1	TDRD9
GO:0044292	dendrite terminus	cellular_component	0.0426555	1	1	IFT52
GO:0072599	establishment of protein localization to endoplasmic reticulum	biological_process	0.0426555	1	1	RYR2
GO:0000966	RNA 5'-end processing	biological_process	0.0426555	1	1	PIWIL2
GO:0035720	intraciliary anterograde transport	biological_process	0.0426555	1	1	IFT52
GO:0035945	mitochondrial ncRNA surveillance	biological_process	0.0426555	1	1	SUPV3L1
GO:0031000	response to caffeine	biological_process	0.0426555	1	1	RYR2
GO:0045025	mitochondrial degradosome	cellular_component	0.0426555	1	1	SUPV3L1
GO:0032421	stereocilium bundle	cellular_component	0.0426555	1	1	PCDH15
GO:0070002	glutamic-type peptidase activity	molecular_function	0.0426555	1	1	ASTL
GO:0060478	acrosomal vesicle exocytosis	biological_process	0.0426555	1	1	ZP4
GO:0030718	germ-line stem cell population maintenance	biological_process	0.0426555	1	1	PIWIL2
GO:0045919	positive regulation of cytolysis	biological_process	0.0426555	1	1	GPLD1
GO:0060283	negative regulation of oocyte development	biological_process	0.0426555	1	1	WEE2
GO:0070827	chromatin maintenance	biological_process	0.0426555	1	1	SUPV3L1
GO:0050916	sensory perception of sweet taste	biological_process	0.0426555	1	1	ITPR3
GO:0004948	calcitonin receptor activity	molecular_function	0.0426555	1	1	CALCR
GO:0007276	gamete generation	biological_process	0.0426555	1	1	FANCD2
GO:0051284	positive regulation of sequestering of calcium ion	biological_process	0.0426555	1	1	RYR2
GO:0050913	sensory perception of bitter taste	biological_process	0.0426555	1	1	ITPR3
GO:0032302	MutSbeta complex	cellular_component	0.0426555	1	1	MSH3
GO:0032190	acrosin binding	molecular_function	0.0426555	1	1	ZP4
GO:0035813	regulation of renal sodium excretion	biological_process	0.0426555	1	1	CORIN
GO:0034736	cholesterol O-acyltransferase activity	molecular_function	0.0426555	1	1	SOAT1
GO:0071401	cellular response to triglyceride	biological_process	0.0426555	1	1	GPLD1
GO:0097440	apical dendrite	cellular_component	0.0426555	1	1	NEURL1
GO:0043291	RAVE complex	cellular_component	0.0426555	1	1	DMXL1
GO:0003341	cilium movement	biological_process	0.0426555	1	1	ENSSSCG00000015379
GO:0031914	negative regulation of synaptic plasticity	biological_process	0.0426555	1	1	UNC13C
GO:0010107	potassium ion import	biological_process	0.0426555	1	1	ATP1A3
GO:0050861	positive regulation of B cell receptor signaling pathway	biological_process	0.0426555	1	1	PRKCH
GO:0004621	glycosylphosphatidylinositol phospholipase D activity	molecular_function	0.0426555	1	1	GPLD1
GO:0050917	sensory perception of umami taste	biological_process	0.0426555	1	1	ITPR3
GO:0000965	mitochondrial RNA 3'-end processing	biological_process	0.0426555	1	1	SUPV3L1
GO:0010737	protein kinase A signaling	biological_process	0.0426555	1	1	ZP4
GO:0031416	NatB complex	cellular_component	0.0426555	1	1	NAA25
GO:0008525	phosphatidylcholine transporter activity	molecular_function	0.0426555	1	1	ABCB4
GO:0097159	organic cyclic compound binding	molecular_function	0.0426555	1	1	RYR2
GO:1990416	cellular response to brain-derived neurotrophic factor stimulus	biological_process	0.0426555	1	1	WASF1
GO:0045183	translation factor activity, non-nucleic acid binding	molecular_function	0.0426555	1	1	NEURL1
GO:0033162	melanosome membrane	cellular_component	0.0426555	1	1	DCT
GO:0019800	peptide cross-linking via chondroitin 4-sulfate glycosaminoglycan	biological_process	0.0426555	1	1	EGFLAM
GO:0002430	complement receptor mediated signaling pathway	biological_process	0.0426555	1	1	GPLD1
GO:0071872	cellular response to epinephrine stimulus	biological_process	0.0426555	1	1	RYR2
GO:0030906	retromer, cargo-selective complex	cellular_component	0.0426555	1	1	VPS26A
GO:0061092	positive regulation of phospholipid translocation	biological_process	0.0426555	1	1	ABCB4
GO:0043924	suramin binding	molecular_function	0.0426555	1	1	RYR2
GO:0042135	neurotransmitter catabolic process	biological_process	0.0426555	1	1	NAALAD2
GO:0030007	cellular potassium ion homeostasis	biological_process	0.0426555	1	1	ATP1A3
GO:0005261	cation channel activity	molecular_function	0.0426555	1	1	TRPM3
GO:0045741	positive regulation of epidermal growth factor-activated receptor activity	biological_process	0.0426555	1	1	NEURL1
GO:0007613	memory	biological_process	0.0427104	2	8	ATP1A3;ITPR3
GO:0000186	activation of MAPKK activity	biological_process	0.0427104	2	8	ENSSSCG00000026041;MAP3K15
GO:0004715	non-membrane spanning protein tyrosine kinase activity	molecular_function	0.0427104	2	8	MELK;WEE2
GO:0048854	brain morphogenesis	biological_process	0.0427104	2	8	AKT3;FANCD2
GO:0005201	extracellular matrix structural constituent	molecular_function	0.0427104	2	8	LAMB1;TECTA
GO:0050890	cognition	biological_process	0.0427104	2	8	CHL1;DOPEY2
GO:0005669	transcription factor TFIID complex	cellular_component	0.0534059	2	9	GTF2B;GTF2F1
GO:0008286	insulin receptor signaling pathway	biological_process	0.0534059	2	9	ENSSSCG00000003909;GPLD1
GO:0007368	determination of left/right symmetry	biological_process	0.0534059	2	9	ENSSSCG00000015379;IFT52
GO:0043065	positive regulation of apoptotic process	biological_process	0.0545073	4	34	GPLD1;ITGA6;MELK;NEURL1
GO:0005886	plasma membrane	cellular_component	0.0546761	21	344	ABCB4;ASTL;ATP1A3;ATP6V0A4;CALCR;CORIN;ENSSSCG00000028341;ITGA6;ITPR3;KCNN3;MELK;MMP25;NEURL1;PCDH15;PRKCH;RYR1;RYR2;SENP7;SLC8B1;TRPC4;ZP4
GO:0007605	sensory perception of sound	biological_process	0.0575476	3	21	ATP6V0A4;PCDH15;TECTA
GO:0009986	cell surface	cellular_component	0.0597325	5	50	ABCC2;ADAMTS7;CORIN;ITGA6;TRPC4
GO:0005622	intracellular	cellular_component	0.0624752	12	173	AKT3;ENSSSCG00000002688;ENSSSCG00000026041;GPLD1;HBS1L;IPO8;MAP3K15;MTIF2;PRKCH;SENP7;UNC13C;ZP4
GO:0010951	negative regulation of endopeptidase activity	biological_process	0.0649314	2	10	BIRC6;ENSSSCG00000002341
GO:0008344	adult locomotory behavior	biological_process	0.0649314	2	10	ATP1A3;CHL1
GO:0008081	phosphoric diester hydrolase activity	molecular_function	0.0649314	2	10	ENSSSCG00000002688;PDE6C
GO:0043588	skin development	biological_process	0.0649314	2	10	ITGA6;RYR1
GO:0007283	spermatogenesis	biological_process	0.0704638	4	37	FKBP6;PCYT1B;PIWIL2;TDRD9
GO:0045211	postsynaptic membrane	cellular_component	0.0771977	2	11	CADPS2;GABBR1
GO:1905515	non-motile cilium assembly	NA	0.0771977	2	11	IFT52;PCDH15
GO:0006874	cellular calcium ion homeostasis	biological_process	0.0771977	2	11	RYR1;RYR2
GO:0001750	photoreceptor outer segment	cellular_component	0.0771977	2	11	MYO5A;PCDH15
GO:0015183	L-aspartate transmembrane transporter activity	molecular_function	0.0835047	1	2	SLC25A13
GO:0097186	amelogenesis	biological_process	0.0835047	1	2	ITGA6
GO:0001518	voltage-gated sodium channel complex	cellular_component	0.0835047	1	2	ENSSSCG00000024299
GO:0001829	trophectodermal cell differentiation	biological_process	0.0835047	1	2	CNOT3
GO:0006851	mitochondrial calcium ion transport	biological_process	0.0835047	1	2	SLC8B1
GO:0042491	auditory receptor cell differentiation	biological_process	0.0835047	1	2	PCDH15
GO:0015866	ADP transport	biological_process	0.0835047	1	2	SLC25A24
GO:0051388	positive regulation of neurotrophin TRK receptor signaling pathway	biological_process	0.0835047	1	2	WASF1
GO:0022409	positive regulation of cell-cell adhesion	biological_process	0.0835047	1	2	ITGA6
GO:0032252	secretory granule localization	biological_process	0.0835047	1	2	MYO5A
GO:0071559	response to transforming growth factor beta	biological_process	0.0835047	1	2	ZFHX3
GO:0098536	deuterosome	cellular_component	0.0835047	1	2	ENSSSCG00000014943
GO:0089712	L-aspartate transmembrane transport	biological_process	0.0835047	1	2	SLC25A13
GO:0060022	hard palate development	biological_process	0.0835047	1	2	MMP25
GO:0098907	regulation of SA node cell action potential	biological_process	0.0835047	1	2	RYR2
GO:0005220	inositol 1,4,5-trisphosphate-sensitive calcium-release channel activity	molecular_function	0.0835047	1	2	ITPR3
GO:0005436	sodium:phosphate symporter activity	molecular_function	0.0835047	1	2	SLC17A1
GO:0032402	melanosome transport	biological_process	0.0835047	1	2	MYO5A
GO:0015810	aspartate transport	biological_process	0.0835047	1	2	SLC25A13
GO:0048709	oligodendrocyte differentiation	biological_process	0.0835047	1	2	TRPC4
GO:0090162	establishment of epithelial cell polarity	biological_process	0.0835047	1	2	FRMD4B
GO:0015867	ATP transport	biological_process	0.0835047	1	2	SLC25A24
GO:0005890	sodium:potassium-exchanging ATPase complex	cellular_component	0.0835047	1	2	ATP1A3
GO:0050796	regulation of insulin secretion	biological_process	0.0835047	1	2	SLC8B1
GO:0010248	establishment or maintenance of transmembrane electrochemical gradient	biological_process	0.0835047	1	2	ATP1A3
GO:0070838	divalent metal ion transport	biological_process	0.0835047	1	2	SLC41A2
GO:0004459	L-lactate dehydrogenase activity	molecular_function	0.0835047	1	2	LDHC
GO:0071546	pi-body	cellular_component	0.0835047	1	2	PIWIL2
GO:0051560	mitochondrial calcium ion homeostasis	biological_process	0.0835047	1	2	SLC8B1
GO:0090662	ATP hydrolysis coupled transmembrane transport	NA	0.0835047	1	2	ATP1A3
GO:0097025	MPP7-DLG1-LIN7 complex	cellular_component	0.0835047	1	2	MPP7
GO:0071896	protein localization to adherens junction	biological_process	0.0835047	1	2	MPP7
GO:0034379	very-low-density lipoprotein particle assembly	biological_process	0.0835047	1	2	SOAT1
GO:0090129	positive regulation of synapse maturation	biological_process	0.0835047	1	2	NEURL1
GO:0021847	ventricular zone neuroblast division	biological_process	0.0835047	1	2	DCT
GO:0051044	positive regulation of membrane protein ectodomain proteolysis	biological_process	0.0835047	1	2	GPLD1
GO:0010954	positive regulation of protein processing	biological_process	0.0835047	1	2	ASTL
GO:0030056	hemidesmosome	cellular_component	0.0835047	1	2	ITGA6
GO:0086005	ventricular cardiac muscle cell action potential	biological_process	0.0835047	1	2	RYR2
GO:0004630	phospholipase D activity	molecular_function	0.0835047	1	2	GPLD1
GO:0016082	synaptic vesicle priming	biological_process	0.0835047	1	2	CADPS2
GO:0043490	malate-aspartate shuttle	biological_process	0.0835047	1	2	SLC25A13
GO:0098910	regulation of atrial cardiac muscle cell action potential	biological_process	0.0835047	1	2	RYR2
GO:0010529	negative regulation of transposition	biological_process	0.0835047	1	2	PIWIL2
GO:0051096	positive regulation of helicase activity	biological_process	0.0835047	1	2	MSH3
GO:0097433	dense body	cellular_component	0.0835047	1	2	PIWIL2
GO:0015269	calcium-activated potassium channel activity	molecular_function	0.0835047	1	2	KCNN3
GO:0007588	excretion	biological_process	0.0835047	1	2	ATP6V0A4
GO:0010881	regulation of cardiac muscle contraction by regulation of the release of sequestered calcium ion	biological_process	0.0835047	1	2	RYR2
GO:0032592	integral component of mitochondrial membrane	cellular_component	0.0835047	1	2	SLC8B1
GO:0090554	phosphatidylcholine-translocating ATPase activity	molecular_function	0.0835047	1	2	ABCB4
GO:0097359	UDP-glucosylation	biological_process	0.0835047	1	2	ENSSSCG00000009502
GO:0005347	ATP transmembrane transporter activity	molecular_function	0.0835047	1	2	SLC25A24
GO:0048808	male genitalia morphogenesis	biological_process	0.0835047	1	2	SYCP2
GO:0010744	positive regulation of macrophage derived foam cell differentiation	biological_process	0.0835047	1	2	PRKCH
GO:0031987	locomotion involved in locomotory behavior	biological_process	0.0835047	1	2	MYO5A
GO:0055117	regulation of cardiac muscle contraction	biological_process	0.0835047	1	2	RYR2
GO:0031526	brush border membrane	cellular_component	0.0835047	1	2	ATP6V0A4
GO:0032782	bile acid secretion	biological_process	0.0835047	1	2	ABCB4
GO:0032331	negative regulation of chondrocyte differentiation	biological_process	0.0835047	1	2	ADAMTS7
GO:0032593	insulin-responsive compartment	cellular_component	0.0835047	1	2	MYO5A
GO:0015217	ADP transmembrane transporter activity	molecular_function	0.0835047	1	2	SLC25A24
GO:0089711	L-glutamate transmembrane transport	biological_process	0.0835047	1	2	SLC25A13
GO:0005391	sodium:potassium-exchanging ATPase activity	molecular_function	0.0835047	1	2	ATP1A3
GO:0035994	response to muscle stretch	biological_process	0.0835047	1	2	RYR2
GO:0031674	I band	cellular_component	0.0835047	1	2	RYR1
GO:0006212	uracil catabolic process	biological_process	0.0835047	1	2	DPYS
GO:0072509	divalent inorganic cation transmembrane transporter activity	molecular_function	0.0835047	1	2	SLC41A2
GO:0035584	calcium-mediated signaling using intracellular calcium source	biological_process	0.0835047	1	2	RYR2
GO:0055074	calcium ion homeostasis	biological_process	0.0835047	1	2	CAPS2
GO:0007288	sperm axoneme assembly	biological_process	0.0835047	1	2	NEURL1
GO:0032400	melanosome localization	biological_process	0.0835047	1	2	MYO5A
GO:0006208	pyrimidine nucleobase catabolic process	biological_process	0.0835047	1	2	DPYS
GO:0071442	positive regulation of histone H3-K14 acetylation	biological_process	0.0835047	1	2	PIWIL2
GO:0031209	SCAR complex	cellular_component	0.0835047	1	2	WASF1
GO:0003220	left ventricular cardiac muscle tissue morphogenesis	biological_process	0.0835047	1	2	RYR2
GO:0030314	junctional membrane complex	cellular_component	0.0835047	1	2	RYR1
GO:0030050	vesicle transport along actin filament	biological_process	0.0835047	1	2	MYO5A
GO:0030061	mitochondrial crista	cellular_component	0.0835047	1	2	SLC8B1
GO:0005658	alpha DNA polymerase:primase complex	cellular_component	0.0835047	1	2	ENSSSCG00000001493
GO:0060252	positive regulation of glial cell proliferation	biological_process	0.0835047	1	2	PRKCH
GO:0016286	small conductance calcium-activated potassium channel activity	molecular_function	0.0835047	1	2	KCNN3
GO:0061351	neural precursor cell proliferation	biological_process	0.0835047	1	2	MELK
GO:0097542	ciliary tip	cellular_component	0.0835047	1	2	IFT52
GO:0050953	sensory perception of light stimulus	biological_process	0.0835047	1	2	PDE6C
GO:2000348	regulation of CD40 signaling pathway	biological_process	0.0835047	1	2	FANCD2
GO:0005227	calcium activated cation channel activity	molecular_function	0.0835047	1	2	TRPM3
GO:0060013	righting reflex	biological_process	0.0835047	1	2	PCDH15
GO:0014850	response to muscle activity	biological_process	0.0835047	1	2	RYR2
GO:1900194	negative regulation of oocyte maturation	biological_process	0.0835047	1	2	WEE2
GO:2001275	positive regulation of glucose import in response to insulin stimulus	biological_process	0.0835047	1	2	ENSSSCG00000003909
GO:0005313	L-glutamate transmembrane transporter activity	molecular_function	0.0835047	1	2	SLC25A13
GO:2000810	regulation of bicellular tight junction assembly	biological_process	0.0835047	1	2	PRKCH
GO:0003980	UDP-glucose:glycoprotein glucosyltransferase activity	molecular_function	0.0835047	1	2	ENSSSCG00000009502
GO:0051775	response to redox state	biological_process	0.0835047	1	2	RYR2
GO:0007186	G-protein coupled receptor signaling pathway	biological_process	0.0880889	3	25	ATRNL1;CALCR;GABBR1
GO:0032869	cellular response to insulin stimulus	biological_process	0.0901217	2	12	GPLD1;MYO5A
GO:0001669	acrosomal vesicle	cellular_component	0.0901217	2	12	CALCR;TCP11
GO:0006898	receptor-mediated endocytosis	biological_process	0.0901217	2	12	TMPRSS15;WASF1
GO:0008236	serine-type peptidase activity	molecular_function	0.0901217	2	12	ENSSSCG00000000540;TMPRSS15
GO:0007160	cell-matrix adhesion	biological_process	0.0901217	2	12	ITGA6;TECTA
GO:0031012	extracellular matrix	cellular_component	0.0950364	4	41	ADAMTS7;ENSSSCG00000002341;LAMB1;MMP25
GO:0016459	myosin complex	cellular_component	0.103626	2	13	MYH15;MYO5A
GO:0051536	iron-sulfur cluster binding	molecular_function	0.103626	2	13	ENSSSCG00000001493;ENSSSCG00000007733
GO:0043473	pigmentation	biological_process	0.103626	2	13	DCT;MYO5A
GO:0001726	ruffle	cellular_component	0.103626	2	13	FRMD4B;MYO5A
GO:0005814	centriole	cellular_component	0.105443	3	27	ENSSSCG00000014943;IFT52;OFD1
GO:0016324	apical plasma membrane	cellular_component	0.105443	3	27	ABCB4;ABCC2;ATP6V0A4
GO:0005802	trans-Golgi network	cellular_component	0.105443	3	27	BIRC6;DOPEY1;DOPEY2
GO:0016787	hydrolase activity	molecular_function	0.11471	10	153	ASTL;ATP1A3;DPYS;ENSSSCG00000000540;ENSSSCG00000002688;ENSSSCG00000027898;MMP25;PDE6C;TDRD9;TMPRSS15
GO:0034599	cellular response to oxidative stress	biological_process	0.117638	2	14	FANCD2;SLC25A24
GO:0016853	isomerase activity	molecular_function	0.117638	2	14	DCT;FKBP6
GO:0031514	motile cilium	cellular_component	0.117638	2	14	ENSSSCG00000015379;LDHC
GO:0001666	response to hypoxia	biological_process	0.117638	2	14	RYR1;RYR2
GO:2001237	negative regulation of extrinsic apoptotic signaling pathway	biological_process	0.117638	2	14	BIRC6;ITGA6
GO:0000165	MAPK cascade	biological_process	0.117638	2	14	ENSSSCG00000026041;MAP3K15
GO:0045177	apical part of cell	cellular_component	0.117638	2	14	ATP6V0A4;CHL1
GO:0019899	enzyme binding	molecular_function	0.1226	5	62	MSH3;PRKCH;RYR1;RYR2;ZFHX3
GO:0004114	3',5'-cyclic-nucleotide phosphodiesterase activity	molecular_function	0.122623	1	3	PDE6C
GO:0050910	detection of mechanical stimulus involved in sensory perception of sound	biological_process	0.122623	1	3	PCDH15
GO:0060088	auditory receptor cell stereocilium organization	biological_process	0.122623	1	3	PCDH15
GO:0005539	glycosaminoglycan binding	molecular_function	0.122623	1	3	EGFLAM
GO:0019752	carboxylic acid metabolic process	biological_process	0.122623	1	3	LDHC
GO:0008324	cation transmembrane transporter activity	molecular_function	0.122623	1	3	SLC41A2
GO:0030017	sarcomere	cellular_component	0.122623	1	3	RYR2
GO:0004435	phosphatidylinositol phospholipase C activity	molecular_function	0.122623	1	3	ENSSSCG00000002688
GO:0017196	N-terminal peptidyl-methionine acetylation	biological_process	0.122623	1	3	NAA25
GO:0035371	microtubule plus-end	cellular_component	0.122623	1	3	MYO5A
GO:0071539	protein localization to centrosome	biological_process	0.122623	1	3	CEP131
GO:0034351	negative regulation of glial cell apoptotic process	biological_process	0.122623	1	3	PRKCH
GO:0031519	PcG protein complex	cellular_component	0.122623	1	3	CSNK2A2
GO:0030427	site of polarized growth	cellular_component	0.122623	1	3	ENSSSCG00000009337
GO:0098911	regulation of ventricular cardiac muscle cell action potential	biological_process	0.122623	1	3	RYR2
GO:0038132	neuregulin binding	molecular_function	0.122623	1	3	ITGA6
GO:0035878	nail development	biological_process	0.122623	1	3	ITGA6
GO:0098535	de novo centriole assembly involved in multi-ciliated epithelial cell differentiation	biological_process	0.122623	1	3	ENSSSCG00000014943
GO:0010181	FMN binding	molecular_function	0.122623	1	3	ENSSSCG00000007733
GO:0045178	basal part of cell	cellular_component	0.122623	1	3	ITGA6
GO:0033179	proton-transporting V-type ATPase, V0 domain	cellular_component	0.122623	1	3	ATP6V0A4
GO:0015279	store-operated calcium channel activity	molecular_function	0.122623	1	3	TRPC4
GO:0017025	TBP-class protein binding	molecular_function	0.122623	1	3	GTF2B
GO:0045589	regulation of regulatory T cell differentiation	biological_process	0.122623	1	3	FANCD2
GO:0006090	pyruvate metabolic process	biological_process	0.122623	1	3	LDHC
GO:0019992	diacylglycerol binding	molecular_function	0.122623	1	3	UNC13C
GO:0097546	ciliary base	cellular_component	0.122623	1	3	IFT52
GO:0097150	neuronal stem cell population maintenance	biological_process	0.122623	1	3	FANCD2
GO:0016471	vacuolar proton-transporting V-type ATPase complex	cellular_component	0.122623	1	3	ATP6V0A4
GO:0002027	regulation of heart rate	biological_process	0.122623	1	3	RYR2
GO:0007189	adenylate cyclase-activating G-protein coupled receptor signaling pathway	biological_process	0.122623	1	3	CALCR
GO:0000220	vacuolar proton-transporting V-type ATPase, V0 domain	cellular_component	0.122623	1	3	ATP6V0A4
GO:0030992	intraciliary transport particle B	cellular_component	0.122623	1	3	IFT52
GO:0060712	spongiotrophoblast layer development	biological_process	0.122623	1	3	BIRC6
GO:0050873	brown fat cell differentiation	biological_process	0.122623	1	3	ITGA6
GO:0043631	RNA polyadenylation	biological_process	0.122623	1	3	PAPOLG
GO:0048016	inositol phosphate-mediated signaling	biological_process	0.122623	1	3	ITPR3
GO:0016486	peptide hormone processing	biological_process	0.122623	1	3	CORIN
GO:0045736	negative regulation of cyclin-dependent protein serine/threonine kinase activity	biological_process	0.122623	1	3	WEE2
GO:0006828	manganese ion transport	biological_process	0.122623	1	3	TRPC4
GO:0004869	cysteine-type endopeptidase inhibitor activity	molecular_function	0.122623	1	3	BIRC6
GO:0043204	perikaryon	cellular_component	0.122623	1	3	NEURL1
GO:0016601	Rac protein signal transduction	biological_process	0.122623	1	3	WASF1
GO:0036126	sperm flagellum	cellular_component	0.122623	1	3	TCP11
GO:0004652	polynucleotide adenylyltransferase activity	molecular_function	0.122623	1	3	PAPOLG
GO:0035640	exploration behavior	biological_process	0.122623	1	3	CHL1
GO:0046415	urate metabolic process	biological_process	0.122623	1	3	SLC17A1
GO:0016504	peptidase activator activity	molecular_function	0.122623	1	3	PCOLCE2
GO:0050434	positive regulation of viral transcription	biological_process	0.122623	1	3	GTF2B
GO:0097264	self proteolysis	biological_process	0.122623	1	3	TENM2
GO:0008514	organic anion transmembrane transporter activity	molecular_function	0.122623	1	3	ABCC2
GO:0009395	phospholipid catabolic process	biological_process	0.122623	1	3	ENSSSCG00000002688
GO:0007129	synapsis	biological_process	0.122623	1	3	FANCD2
GO:2000601	positive regulation of Arp2/3 complex-mediated actin nucleation	biological_process	0.122623	1	3	WASF1
GO:0005528	FK506 binding	molecular_function	0.122623	1	3	FKBP6
GO:0046847	filopodium assembly	biological_process	0.122623	1	3	ITGA6
GO:0043195	terminal bouton	cellular_component	0.122623	1	3	UNC13C
GO:0007193	adenylate cyclase-inhibiting G-protein coupled receptor signaling pathway	biological_process	0.122623	1	3	GABBR1
GO:2000617	positive regulation of histone H3-K9 acetylation	biological_process	0.122623	1	3	PIWIL2
GO:0007595	lactation	biological_process	0.122623	1	3	NEURL1
GO:0048791	calcium ion-regulated exocytosis of neurotransmitter	biological_process	0.122623	1	3	ENSSSCG00000028341
GO:0097422	tubular endosome	cellular_component	0.122623	1	3	VPS26A
GO:0048873	homeostasis of number of cells within a tissue	biological_process	0.122623	1	3	AKT3
GO:0010742	macrophage derived foam cell differentiation	biological_process	0.122623	1	3	SOAT1
GO:0051090	regulation of sequence-specific DNA binding transcription factor activity	biological_process	0.122623	1	3	FANCD2
GO:0060999	positive regulation of dendritic spine development	biological_process	0.122623	1	3	NEURL1
GO:1904145	negative regulation of meiotic cell cycle process involved in oocyte maturation	NA	0.122623	1	3	WEE2
GO:0010882	regulation of cardiac muscle contraction by calcium ion signaling	biological_process	0.122623	1	3	RYR2
GO:0097484	dendrite extension	biological_process	0.122623	1	3	WASF1
GO:0051879	Hsp90 protein binding	molecular_function	0.122623	1	3	FKBP6
GO:0015711	organic anion transport	biological_process	0.122623	1	3	ABCC2
GO:0022891	substrate-specific transmembrane transporter activity	molecular_function	0.122623	1	3	SVOPL
GO:0035235	ionotropic glutamate receptor signaling pathway	biological_process	0.122623	1	3	ATP1A3
GO:0060711	labyrinthine layer development	biological_process	0.122623	1	3	BIRC6
GO:0030015	CCR4-NOT core complex	cellular_component	0.122623	1	3	CNOT3
GO:0034236	protein kinase A catalytic subunit binding	molecular_function	0.122623	1	3	RYR2
GO:0010332	response to gamma radiation	biological_process	0.122623	1	3	FANCD2
GO:0006906	vesicle fusion	biological_process	0.122623	1	3	ENSSSCG00000028341
GO:0045746	negative regulation of Notch signaling pathway	biological_process	0.122623	1	3	NEURL1
GO:0016887	ATPase activity	molecular_function	0.128868	5	63	ABCB4;ABCC2;ENSSSCG00000007848;ENSSSCG00000015379;ENSSSCG00000026730
GO:0003697	single-stranded DNA binding	molecular_function	0.132092	2	15	ENSSSCG00000001493;MSH3
GO:0002020	protease binding	molecular_function	0.132092	2	15	CHL1;RYR1
GO:0016779	nucleotidyltransferase activity	molecular_function	0.132092	2	15	ENSSSCG00000001493;PAPOLG
GO:0007268	chemical synaptic transmission	biological_process	0.146924	2	16	MYO5A;UNC13C
GO:0004871	signal transducer activity	molecular_function	0.153884	3	32	CALCR;ENSSSCG00000002688;ZP4
GO:0070509	calcium ion import	biological_process	0.160084	1	4	TRPC4
GO:0030141	secretory granule	cellular_component	0.160084	1	4	MYO5A
GO:0002009	morphogenesis of an epithelium	biological_process	0.160084	1	4	PCDH15
GO:0030286	dynein complex	cellular_component	0.160084	1	4	ENSSSCG00000015379
GO:0015299	solute:proton antiporter activity	molecular_function	0.160084	1	4	SLC9B1
GO:0019722	calcium-mediated signaling	biological_process	0.160084	1	4	RYR2
GO:0034237	protein kinase A regulatory subunit binding	molecular_function	0.160084	1	4	RYR2
GO:0006936	muscle contraction	biological_process	0.160084	1	4	RYR1
GO:0000002	mitochondrial genome maintenance	biological_process	0.160084	1	4	AKT3
GO:0050808	synapse organization	biological_process	0.160084	1	4	MYO5A
GO:0032433	filopodium tip	cellular_component	0.160084	1	4	MYO5A
GO:0032870	cellular response to hormone stimulus	biological_process	0.160084	1	4	ABCC2
GO:0090527	actin filament reorganization	biological_process	0.160084	1	4	ENSSSCG00000009337
GO:1990126	retrograde transport, endosome to plasma membrane	biological_process	0.160084	1	4	VPS26A
GO:0031994	insulin-like growth factor I binding	molecular_function	0.160084	1	4	ITGA6
GO:0005388	calcium-transporting ATPase activity	molecular_function	0.160084	1	4	ENSSSCG00000027898
GO:0007188	adenylate cyclase-modulating G-protein coupled receptor signaling pathway	biological_process	0.160084	1	4	SENP7
GO:0006885	regulation of pH	biological_process	0.160084	1	4	ATP6V0A4
GO:0005070	SH3/SH2 adaptor activity	molecular_function	0.160084	1	4	SHD
GO:0030048	actin filament-based movement	biological_process	0.160084	1	4	MYO5A
GO:0000146	microfilament motor activity	molecular_function	0.160084	1	4	MYO5A
GO:0045921	positive regulation of exocytosis	biological_process	0.160084	1	4	CADPS2
GO:0010952	positive regulation of peptidase activity	biological_process	0.160084	1	4	PCOLCE2
GO:0048468	cell development	biological_process	0.160084	1	4	DCT
GO:0007267	cell-cell signaling	biological_process	0.160084	1	4	PCDH15
GO:0000062	fatty-acyl-CoA binding	molecular_function	0.160084	1	4	SOAT1
GO:0031123	RNA 3'-end processing	biological_process	0.160084	1	4	PAPOLG
GO:0030073	insulin secretion	biological_process	0.160084	1	4	MYO5A
GO:0000288	nuclear-transcribed mRNA catabolic process, deadenylation-dependent decay	biological_process	0.160084	1	4	CNOT3
GO:0017080	sodium channel regulator activity	molecular_function	0.160084	1	4	ENSSSCG00000024299
GO:0071397	cellular response to cholesterol	biological_process	0.160084	1	4	GPLD1
GO:0035435	phosphate ion transmembrane transport	biological_process	0.160084	1	4	SLC17A1
GO:0060122	inner ear receptor stereocilium organization	biological_process	0.160084	1	4	PCDH15
GO:0009925	basal plasma membrane	cellular_component	0.160084	1	4	ITGA6
GO:0005044	scavenger receptor activity	molecular_function	0.160084	1	4	TMPRSS15
GO:0044804	nucleophagy	biological_process	0.160084	1	4	ATG2B
GO:0043395	heparan sulfate proteoglycan binding	molecular_function	0.160084	1	4	ATP1A3
GO:0032968	positive regulation of transcription elongation from RNA polymerase II promoter	biological_process	0.160084	1	4	GTF2F1
GO:0033391	chromatoid body	cellular_component	0.160084	1	4	PIWIL2
GO:0000786	nucleosome	cellular_component	0.160084	1	4	SHPRH
GO:0045618	positive regulation of keratinocyte differentiation	biological_process	0.160084	1	4	PRKCH
GO:0004180	carboxypeptidase activity	molecular_function	0.160084	1	4	NAALAD2
GO:0048741	skeletal muscle fiber development	biological_process	0.160084	1	4	RYR1
GO:0030010	establishment of cell polarity	biological_process	0.160084	1	4	MELK
GO:0005884	actin filament	cellular_component	0.160084	1	4	MYO5A
GO:0045333	cellular respiration	biological_process	0.160084	1	4	SLC25A13
GO:0000166	nucleotide binding	molecular_function	0.180729	18	336	ABCB4;ABCC2;AKT3;ATP1A3;CSNK2A2;ENSSSCG00000007848;ENSSSCG00000026041;ENSSSCG00000026730;ENSSSCG00000027898;ESRP1;MAP3K15;MELK;MYH15;MYO5A;PRKCH;TDRD10;TDRD9;WEE2
GO:0018108	peptidyl-tyrosine phosphorylation	biological_process	0.193133	2	19	MELK;WEE2
GO:0030316	osteoclast differentiation	biological_process	0.195958	1	5	CALCR
GO:0051491	positive regulation of filopodium assembly	biological_process	0.195958	1	5	NEURL1
GO:0003143	embryonic heart tube morphogenesis	biological_process	0.195958	1	5	RYR2
GO:0015485	cholesterol binding	molecular_function	0.195958	1	5	SOAT1
GO:0015986	ATP synthesis coupled proton transport	biological_process	0.195958	1	5	ATP6V0A4
GO:0005178	integrin binding	molecular_function	0.195958	1	5	ITGA6
GO:0030315	T-tubule	cellular_component	0.195958	1	5	RYR1
GO:0048839	inner ear development	biological_process	0.195958	1	5	PCDH15
GO:0055088	lipid homeostasis	biological_process	0.195958	1	5	ABCB4
GO:0017160	Ral GTPase binding	molecular_function	0.195958	1	5	PRKCH
GO:0031334	positive regulation of protein complex assembly	biological_process	0.195958	1	5	MPP7
GO:0015078	hydrogen ion transmembrane transporter activity	molecular_function	0.195958	1	5	ATP6V0A4
GO:0002042	cell migration involved in sprouting angiogenesis	biological_process	0.195958	1	5	GPLD1
GO:2000036	regulation of stem cell population maintenance	biological_process	0.195958	1	5	CNOT3
GO:0004596	peptide alpha-N-acetyltransferase activity	molecular_function	0.195958	1	5	NAA25
GO:0035987	endodermal cell differentiation	biological_process	0.195958	1	5	LAMB1
GO:0032391	photoreceptor connecting cilium	cellular_component	0.195958	1	5	IFT52
GO:0030279	negative regulation of ossification	biological_process	0.195958	1	5	CALCR
GO:0006401	RNA catabolic process	biological_process	0.195958	1	5	SUPV3L1
GO:0008299	isoprenoid biosynthetic process	biological_process	0.195958	1	5	ENSSSCG00000011061
GO:0001503	ossification	biological_process	0.195958	1	5	ATP6V0A4
GO:0033627	cell adhesion mediated by integrin	biological_process	0.195958	1	5	ITGA6
GO:0006360	transcription from RNA polymerase I promoter	biological_process	0.195958	1	5	TAF1A
GO:0008217	regulation of blood pressure	biological_process	0.195958	1	5	CORIN
GO:0048820	hair follicle maturation	biological_process	0.195958	1	5	MYO5A
GO:0051219	phosphoprotein binding	molecular_function	0.195958	1	5	DPYS
GO:0002052	positive regulation of neuroblast proliferation	biological_process	0.195958	1	5	DCT
GO:0001841	neural tube formation	biological_process	0.195958	1	5	IFT52
GO:0032465	regulation of cytokinesis	biological_process	0.195958	1	5	BIRC6
GO:0048477	oogenesis	biological_process	0.195958	1	5	PIWIL2
GO:0043488	regulation of mRNA stability	biological_process	0.195958	1	5	CALCR
GO:0071897	DNA biosynthetic process	biological_process	0.195958	1	5	ENSSSCG00000001493
GO:0009967	positive regulation of signal transduction	biological_process	0.195958	1	5	SHD
GO:0010824	regulation of centrosome duplication	biological_process	0.195958	1	5	CEP131
GO:0010811	positive regulation of cell-substrate adhesion	biological_process	0.195958	1	5	EGFLAM
GO:0051321	meiotic cell cycle	biological_process	0.195958	1	5	WEE2
GO:0000800	lateral element	cellular_component	0.195958	1	5	SYCP2
GO:0007214	gamma-aminobutyric acid signaling pathway	biological_process	0.195958	1	5	GABBR1
GO:0070182	DNA polymerase binding	molecular_function	0.195958	1	5	FANCD2
GO:0070584	mitochondrion morphogenesis	biological_process	0.195958	1	5	SUPV3L1
GO:0090316	positive regulation of intracellular protein transport	biological_process	0.195958	1	5	CEP131
GO:0030983	mismatched DNA binding	molecular_function	0.195958	1	5	MSH3
GO:0070613	regulation of protein processing	biological_process	0.195958	1	5	IFT52
GO:0034446	substrate adhesion-dependent cell spreading	biological_process	0.195958	1	5	LAMB1
GO:0034451	centriolar satellite	cellular_component	0.195958	1	5	CEP131
GO:0005524	ATP binding	molecular_function	0.20167	21	407	ABCB4;ABCC2;AKT3;ALPK2;ATP1A3;CSNK2A2;ENSSSCG00000007848;ENSSSCG00000015379;ENSSSCG00000026041;ENSSSCG00000026730;ENSSSCG00000027898;MAP3K15;MELK;MSH3;MYH15;MYO5A;PRKCH;SHPRH;SPATA5;TDRD9;WEE2
GO:0007156	homophilic cell adhesion via plasma membrane adhesion molecules	biological_process	0.230309	1	6	PCDH15
GO:0005882	intermediate filament	cellular_component	0.230309	1	6	MYO5A
GO:0035307	positive regulation of protein dephosphorylation	biological_process	0.230309	1	6	CDCA2
GO:0032008	positive regulation of TOR signaling	biological_process	0.230309	1	6	AKT3
GO:0003887	DNA-directed DNA polymerase activity	molecular_function	0.230309	1	6	ENSSSCG00000001493
GO:0031589	cell-substrate adhesion	biological_process	0.230309	1	6	ITGA6
GO:0001541	ovarian follicle development	biological_process	0.230309	1	6	PCYT1B
GO:0009966	regulation of signal transduction	biological_process	0.230309	1	6	BIRC6
GO:1902600	hydrogen ion transmembrane transport	biological_process	0.230309	1	6	SLC9B1
GO:0006471	protein ADP-ribosylation	biological_process	0.230309	1	6	ART3
GO:0004697	protein kinase C activity	molecular_function	0.230309	1	6	PRKCH
GO:0007204	positive regulation of cytosolic calcium ion concentration	biological_process	0.230309	1	6	CALCR
GO:0046966	thyroid hormone receptor binding	molecular_function	0.230309	1	6	GTF2B
GO:0071773	cellular response to BMP stimulus	biological_process	0.230309	1	6	ADAMTS7
GO:0001890	placenta development	biological_process	0.230309	1	6	BIRC6
GO:0016788	hydrolase activity, acting on ester bonds	molecular_function	0.230309	1	6	ENSSSCG00000016073
GO:0030014	CCR4-NOT complex	cellular_component	0.230309	1	6	CNOT3
GO:0032420	stereocilium	cellular_component	0.230309	1	6	PCDH15
GO:0042327	positive regulation of phosphorylation	biological_process	0.230309	1	6	ITGA6
GO:0030863	cortical cytoskeleton	cellular_component	0.230309	1	6	TRPC4
GO:0061631	ubiquitin conjugating enzyme activity	molecular_function	0.230309	1	6	BIRC6
GO:0004521	endoribonuclease activity	molecular_function	0.230309	1	6	PIWIL2
GO:0060291	long-term synaptic potentiation	biological_process	0.230309	1	6	ITPR3
GO:0060349	bone morphogenesis	biological_process	0.230309	1	6	PAPPA2
GO:0048786	presynaptic active zone	cellular_component	0.230309	1	6	UNC13C
GO:0050900	leukocyte migration	biological_process	0.230309	1	6	ITGA6
GO:0030318	melanocyte differentiation	biological_process	0.230309	1	6	MYO5A
GO:0016050	vesicle organization	biological_process	0.230309	1	6	ENSSSCG00000006877
GO:0005942	phosphatidylinositol 3-kinase complex	cellular_component	0.230309	1	6	ENSSSCG00000003909
GO:0004867	serine-type endopeptidase inhibitor activity	molecular_function	0.230309	1	6	ENSSSCG00000002341
GO:0042475	odontogenesis of dentin-containing tooth	biological_process	0.230309	1	6	ITGA6
GO:0099132	ATP hydrolysis coupled cation transmembrane transport	NA	0.230309	1	6	ENSSSCG00000027898
GO:0003899	DNA-directed 5'-3' RNA polymerase activity	molecular_function	0.230309	1	6	ENSSSCG00000001493
GO:0003678	DNA helicase activity	molecular_function	0.230309	1	6	SUPV3L1
GO:0031982	vesicle	cellular_component	0.240902	2	22	MYO5A;VPS26A
GO:0007155	cell adhesion	biological_process	0.253679	3	41	ASTL;ITGA6;PCDH15
GO:0032403	protein complex binding	molecular_function	0.25698	2	23	CEP131;WASF1
GO:0045171	intercellular bridge	cellular_component	0.263204	1	7	CEP131
GO:0000422	mitophagy	biological_process	0.263204	1	7	ATG2B
GO:0071230	cellular response to amino acid stimulus	biological_process	0.263204	1	7	NEURL1
GO:0008203	cholesterol metabolic process	biological_process	0.263204	1	7	SOAT1
GO:0006513	protein monoubiquitination	biological_process	0.263204	1	7	NEURL1
GO:0007628	adult walking behavior	biological_process	0.263204	1	7	PCDH15
GO:0005544	calcium-dependent phospholipid binding	molecular_function	0.263204	1	7	ENSSSCG00000028341
GO:0010923	negative regulation of phosphatase activity	biological_process	0.263204	1	7	CEP192
GO:0046961	proton-transporting ATPase activity, rotational mechanism	molecular_function	0.263204	1	7	ATP6V0A4
GO:0000413	protein peptidyl-prolyl isomerization	biological_process	0.263204	1	7	FKBP6
GO:0048365	Rac GTPase binding	molecular_function	0.263204	1	7	WASF1
GO:0033344	cholesterol efflux	biological_process	0.263204	1	7	SOAT1
GO:0042383	sarcolemma	cellular_component	0.263204	1	7	ATP1A3
GO:0051539	4 iron, 4 sulfur cluster binding	molecular_function	0.263204	1	7	ENSSSCG00000001493
GO:0009749	response to glucose	biological_process	0.263204	1	7	GPLD1
GO:0008542	visual learning	biological_process	0.263204	1	7	ATP1A3
GO:0016817	hydrolase activity, acting on acid anhydrides	molecular_function	0.263204	1	7	SUPV3L1
GO:0030276	clathrin binding	molecular_function	0.263204	1	7	ENSSSCG00000028341
GO:0051087	chaperone binding	molecular_function	0.263204	1	7	ATP1A3
GO:0042102	positive regulation of T cell proliferation	biological_process	0.263204	1	7	ZP4
GO:0042641	actomyosin	cellular_component	0.263204	1	7	MYO5A
GO:0007099	centriole replication	biological_process	0.263204	1	7	ENSSSCG00000014943
GO:0000242	pericentriolar material	cellular_component	0.263204	1	7	CEP192
GO:0043484	regulation of RNA splicing	biological_process	0.263204	1	7	ESRP1
GO:0071347	cellular response to interleukin-1	biological_process	0.263204	1	7	ADAMTS7
GO:0043621	protein self-association	molecular_function	0.263204	1	7	RYR2
GO:0003755	peptidyl-prolyl cis-trans isomerase activity	molecular_function	0.263204	1	7	FKBP6
GO:0043231	intracellular membrane-bounded organelle	cellular_component	0.269609	7	123	BIRC6;CADPS2;CEP131;ENSSSCG00000007848;GPLD1;GTF2F1;TAF1A
GO:0008565	protein transporter activity	molecular_function	0.289163	2	25	KPNA7;VPS26A
GO:0036459	thiol-dependent ubiquitinyl hydrolase activity	molecular_function	0.289163	2	25	ENSSSCG00000008382;USP24
GO:0035556	intracellular signal transduction	biological_process	0.289765	6	105	AKT3;ENSSSCG00000002688;MELK;PRKCH;UNC13C;ZP4
GO:0006378	mRNA polyadenylation	biological_process	0.294703	1	8	PAPOLG
GO:0072001	renal system development	biological_process	0.294703	1	8	ITGA6
GO:0019905	syntaxin binding	molecular_function	0.294703	1	8	ENSSSCG00000028341
GO:0015991	ATP hydrolysis coupled proton transport	biological_process	0.294703	1	8	ATP6V0A4
GO:0030904	retromer complex	cellular_component	0.294703	1	8	VPS26A
GO:0035869	ciliary transition zone	cellular_component	0.294703	1	8	CEP131
GO:0006352	DNA-templated transcription, initiation	biological_process	0.294703	1	8	GTF2B
GO:0070830	bicellular tight junction assembly	biological_process	0.294703	1	8	MPP7
GO:0042632	cholesterol homeostasis	biological_process	0.294703	1	8	SOAT1
GO:0000407	pre-autophagosomal structure	cellular_component	0.294703	1	8	ATG2B
GO:0005245	voltage-gated calcium channel activity	molecular_function	0.294703	1	8	RYR1
GO:0006298	mismatch repair	biological_process	0.294703	1	8	MSH3
GO:0051262	protein tetramerization	biological_process	0.294703	1	8	TRPM3
GO:0051298	centrosome duplication	biological_process	0.294703	1	8	CEP192
GO:0045860	positive regulation of protein kinase activity	biological_process	0.294703	1	8	ZP4
GO:0006839	mitochondrial transport	biological_process	0.294703	1	8	SLC25A24
GO:0006869	lipid transport	biological_process	0.294703	1	8	ENSSSCG00000007848
GO:0051017	actin filament bundle assembly	biological_process	0.294703	1	8	PCDH15
GO:0048565	digestive tract development	biological_process	0.294703	1	8	ITGA6
GO:0009953	dorsal/ventral pattern formation	biological_process	0.294703	1	8	IFT52
GO:0043197	dendritic spine	cellular_component	0.294703	1	8	NEURL1
GO:0016740	transferase activity	molecular_function	0.30132	10	192	AKT3;ART3;ENSSSCG00000001493;ENSSSCG00000011061;MAP3K15;MELK;NSUN7;PRKCH;SOAT1;WEE2
GO:0003729	mRNA binding	molecular_function	0.30521	2	26	ESRP1;PIWIL2
GO:0004004	ATP-dependent RNA helicase activity	molecular_function	0.30521	2	26	SUPV3L1;TDRD9
GO:0006915	apoptotic process	biological_process	0.321191	2	27	BIRC6;MELK
GO:0016579	protein deubiquitination	biological_process	0.321191	2	27	ENSSSCG00000008382;USP24
GO:0016323	basolateral plasma membrane	cellular_component	0.321191	2	27	ITGA6;TRPC4
GO:0070062	extracellular exosome	cellular_component	0.321278	19	395	ABCB4;ART3;ATP6V0A4;CHL1;DOPEY2;DPYS;GPLD1;HBS1L;LAMB1;LDHC;MYO5A;PAPPA2;PCOLCE2;PRKCH;RYR1;RYR2;TECTA;THSD7A;VPS26A
GO:0005623	cell	cellular_component	0.324866	1	9	VPS26A
GO:0008305	integrin complex	cellular_component	0.324866	1	9	ITGA6
GO:0030198	extracellular matrix organization	biological_process	0.324866	1	9	EGFLAM
GO:0032947	protein complex scaffold	molecular_function	0.324866	1	9	MPP7
GO:0016042	lipid catabolic process	biological_process	0.324866	1	9	ENSSSCG00000002688
GO:0007126	meiotic nuclear division	biological_process	0.324866	1	9	FKBP6
GO:0010595	positive regulation of endothelial cell migration	biological_process	0.324866	1	9	GPLD1
GO:0045070	positive regulation of viral genome replication	biological_process	0.324866	1	9	FKBP6
GO:0050680	negative regulation of epithelial cell proliferation	biological_process	0.324866	1	9	IFT52
GO:0016616	oxidoreductase activity, acting on the CH-OH group of donors, NAD or NADP as acceptor	molecular_function	0.324866	1	9	LDHC
GO:0042552	myelination	biological_process	0.324866	1	9	MYO5A
GO:0006397	mRNA processing	biological_process	0.324866	1	9	ENSSSCG00000030119
GO:0007338	single fertilization	biological_process	0.324866	1	9	ZP4
GO:0050727	regulation of inflammatory response	biological_process	0.324866	1	9	FANCD2
GO:0004888	transmembrane signaling receptor activity	molecular_function	0.324866	1	9	CALCR
GO:0006367	transcription initiation from RNA polymerase II promoter	biological_process	0.324866	1	9	GTF2F1
GO:1903146	regulation of mitophagy	biological_process	0.324866	1	9	CSNK2A2
GO:0005215	transporter activity	molecular_function	0.337084	2	28	ABCC2;ENSSSCG00000007848
GO:0003774	motor activity	molecular_function	0.337084	2	28	MYH15;MYO5A
GO:0046872	metal ion binding	molecular_function	0.350785	15	312	ASTL;ATP1A3;DCT;ENSSSCG00000001493;ENSSSCG00000027898;GTF2B;KCMF1;MMP25;PAPOLG;PDE6C;PRKCH;SHPRH;UNC13C;WEE2;ZFHX3
GO:0005815	microtubule organizing center	cellular_component	0.352867	2	29	BIRC6;CEP131
GO:0034220	ion transmembrane transport	biological_process	0.353747	1	10	TRPM3
GO:0030509	BMP signaling pathway	biological_process	0.353747	1	10	RYR2
GO:0005518	collagen binding	molecular_function	0.353747	1	10	PCOLCE2
GO:0006417	regulation of translation	biological_process	0.353747	1	10	NEURL1
GO:0043085	positive regulation of catalytic activity	biological_process	0.353747	1	10	GTF2F1
GO:0006334	nucleosome assembly	biological_process	0.353747	1	10	SHPRH
GO:0000793	condensed chromosome	cellular_component	0.353747	1	10	FANCD2
GO:0071805	potassium ion transmembrane transport	biological_process	0.353747	1	10	KCNN3
GO:0010008	endosome membrane	cellular_component	0.353747	1	10	VPS26A
GO:0007626	locomotory behavior	biological_process	0.353747	1	10	PCDH15
GO:0003151	outflow tract morphogenesis	biological_process	0.353747	1	10	RYR1
GO:0009058	biosynthetic process	biological_process	0.353747	1	10	PCYT1B
GO:0072659	protein localization to plasma membrane	biological_process	0.353747	1	10	MYO5A
GO:0030335	positive regulation of cell migration	biological_process	0.36852	2	30	ITGA6;LAMB1
GO:0001947	heart looping	biological_process	0.381402	1	11	IFT52
GO:0007229	integrin-mediated signaling pathway	biological_process	0.381402	1	11	ITGA6
GO:0051117	ATPase binding	molecular_function	0.381402	1	11	ATP6V0A4
GO:0005912	adherens junction	cellular_component	0.381402	1	11	MPP7
GO:0051225	spindle assembly	biological_process	0.381402	1	11	CEP192
GO:0042645	mitochondrial nucleoid	cellular_component	0.381402	1	11	SUPV3L1
GO:0042493	response to drug	biological_process	0.381402	1	11	ATP1A3
GO:0030018	Z disc	cellular_component	0.381402	1	11	RYR2
GO:0006310	DNA recombination	biological_process	0.381402	1	11	SUPV3L1
GO:0046854	phosphatidylinositol phosphorylation	biological_process	0.381402	1	11	ENSSSCG00000003909
GO:0061077	chaperone-mediated protein folding	biological_process	0.381402	1	11	FKBP6
GO:0035690	cellular response to drug	biological_process	0.381402	1	11	GPLD1
GO:0004553	hydrolase activity, hydrolyzing O-glycosyl compounds	molecular_function	0.381402	1	11	MGAM2
GO:0045332	phospholipid translocation	biological_process	0.381402	1	11	ABCB4
GO:0071356	cellular response to tumor necrosis factor	biological_process	0.381402	1	11	ADAMTS7
GO:0015629	actin cytoskeleton	cellular_component	0.384025	2	31	ABCB4;CORIN
GO:0006468	protein phosphorylation	biological_process	0.393678	8	163	AKT3;ALPK2;CSNK2A2;ENSSSCG00000026041;MAP3K15;MELK;PRKCH;WEE2
GO:0005975	carbohydrate metabolic process	biological_process	0.399368	2	32	LDHC;MGAM2
GO:0015630	microtubule cytoskeleton	cellular_component	0.399368	2	32	CEP131;TAF1A
GO:0016301	kinase activity	molecular_function	0.407499	5	98	AKT3;MAP3K15;MELK;PRKCH;WEE2
GO:0004674	protein serine/threonine kinase activity	molecular_function	0.407499	5	98	AKT3;ALPK2;CSNK2A2;MELK;PRKCH
GO:0000045	autophagosome assembly	biological_process	0.407882	1	12	ATG2B
GO:0005901	caveola	cellular_component	0.407882	1	12	TRPC4
GO:0017148	negative regulation of translation	biological_process	0.407882	1	12	CNOT3
GO:0019902	phosphatase binding	molecular_function	0.407882	1	12	CEP192
GO:0008536	Ran GTPase binding	molecular_function	0.407882	1	12	IPO8
GO:0009615	response to virus	biological_process	0.407882	1	12	GTF2F1
GO:0007166	cell surface receptor signaling pathway	biological_process	0.407882	1	12	CALCR
GO:1903561	extracellular vesicle	cellular_component	0.407882	1	12	ATP1A3
GO:0035091	phosphatidylinositol binding	molecular_function	0.414533	2	33	ENSSSCG00000006877;ITPR3
GO:0003924	GTPase activity	molecular_function	0.429509	2	34	HBS1L;MTIF2
GO:0030054	cell junction	cellular_component	0.429509	2	34	GTF2F1;MPP7
GO:0005769	early endosome	cellular_component	0.429509	2	34	MYO5A;VPS26A
GO:0004672	protein kinase activity	molecular_function	0.431706	7	146	AKT3;CSNK2A2;ENSSSCG00000026041;MAP3K15;MELK;PRKCH;WEE2
GO:0051092	positive regulation of NF-kappaB transcription factor activity	biological_process	0.433237	1	13	PRKCH
GO:0007224	smoothened signaling pathway	biological_process	0.433237	1	13	IFT52
GO:0043235	receptor complex	cellular_component	0.433237	1	13	ITPR3
GO:0005903	brush border	cellular_component	0.433237	1	13	ATP6V0A4
GO:0009267	cellular response to starvation	biological_process	0.433237	1	13	CADPS2
GO:0005844	polysome	cellular_component	0.433237	1	13	PIWIL2
GO:0043524	negative regulation of neuron apoptotic process	biological_process	0.433237	1	13	CHL1
GO:0030246	carbohydrate binding	molecular_function	0.433237	1	13	MGAM2
GO:0060070	canonical Wnt signaling pathway	biological_process	0.433237	1	13	RYR2
GO:0003824	catalytic activity	molecular_function	0.433287	5	101	ENSSSCG00000007733;GTF2F1;LDHC;MGAM2;PCYT1B
GO:0007165	signal transduction	biological_process	0.436624	6	124	AKT3;CALCR;ENSSSCG00000002688;PDE6C;SHD;TENM2
GO:0060271	cilium assembly	biological_process	0.444282	2	35	CEP131;IFT52
GO:0008270	zinc ion binding	molecular_function	0.448036	10	217	ADAMTS7;ASTL;ENSSSCG00000002341;GTF2B;KCMF1;MMP25;NEURL1;PAPPA2;SHPRH;ZFHX3
GO:0051301	cell division	biological_process	0.457514	1	14	CDCA2
GO:0001047	core promoter binding	molecular_function	0.457514	1	14	GTF2B
GO:0042593	glucose homeostasis	biological_process	0.457514	1	14	SLC8B1
GO:0045727	positive regulation of translation	biological_process	0.457514	1	14	PIWIL2
GO:0005923	bicellular tight junction	cellular_component	0.457514	1	14	MPP7
GO:0042733	embryonic digit morphogenesis	biological_process	0.457514	1	14	IFT52
GO:0006887	exocytosis	biological_process	0.457514	1	14	MYO5A
GO:0003743	translation initiation factor activity	molecular_function	0.457514	1	14	MTIF2
GO:0005911	cell-cell junction	cellular_component	0.458844	2	36	PRKCH;TRPC4
GO:0016310	phosphorylation	biological_process	0.458849	5	104	AKT3;MAP3K15;MELK;PRKCH;WEE2
GO:0032508	DNA duplex unwinding	biological_process	0.480758	1	15	SUPV3L1
GO:0009887	animal organ morphogenesis	biological_process	0.480758	1	15	SYCP2
GO:0008201	heparin binding	molecular_function	0.480758	1	15	PCOLCE2
GO:0005741	mitochondrial outer membrane	cellular_component	0.480758	1	15	WASF1
GO:0007015	actin filament organization	biological_process	0.480758	1	15	PCDH15
GO:0030307	positive regulation of cell growth	biological_process	0.480758	1	15	SUPV3L1
GO:0031966	mitochondrial membrane	cellular_component	0.480758	1	15	SLC9B1
GO:0006413	translational initiation	biological_process	0.480758	1	15	MTIF2
GO:0030027	lamellipodium	cellular_component	0.480758	1	15	WASF1
GO:0004713	protein tyrosine kinase activity	molecular_function	0.480758	1	15	WEE2
GO:0006486	protein glycosylation	biological_process	0.480758	1	15	ENSSSCG00000009502
GO:0045296	cadherin binding	molecular_function	0.497747	3	62	ITGA6;MPP7;TRPC4
GO:0005667	transcription factor complex	cellular_component	0.501176	2	39	ENSSSCG00000008909;ZFHX3
GO:0005765	lysosomal membrane	cellular_component	0.501176	2	39	ATP6V0A4;GPLD1
GO:0042147	retrograde transport, endosome to Golgi	biological_process	0.503014	1	16	VPS26A
GO:0009897	external side of plasma membrane	cellular_component	0.503014	1	16	ITGA6
GO:0000398	mRNA splicing, via spliceosome	biological_process	0.503014	1	16	ENSSSCG00000030119
GO:0015992	proton transport	biological_process	0.503014	1	16	ATP6V0A4
GO:0014069	postsynaptic density	cellular_component	0.503014	1	16	NEURL1
GO:0007067	mitotic nuclear division	biological_process	0.503014	1	16	WEE2
GO:0005694	chromosome	cellular_component	0.503014	1	16	CDCA2
GO:0008285	negative regulation of cell proliferation	biological_process	0.514813	2	40	GPLD1;NEURL1
GO:0000902	cell morphogenesis	biological_process	0.524322	1	17	ENSSSCG00000009337
GO:0008013	beta-catenin binding	molecular_function	0.524322	1	17	TRPC4
GO:0007411	axon guidance	biological_process	0.524322	1	17	CHL1
GO:0007059	chromosome segregation	biological_process	0.524322	1	17	CDCA2
GO:0051603	proteolysis involved in cellular protein catabolic process	biological_process	0.524322	1	17	ADAMTS7
GO:0006954	inflammatory response	biological_process	0.524322	1	17	MMP25
GO:0043066	negative regulation of apoptotic process	biological_process	0.540407	3	66	BIRC6;SUPV3L1;SYCP2
GO:0006281	DNA repair	biological_process	0.541347	2	42	FANCD2;MSH3
GO:0001764	neuron migration	biological_process	0.544724	1	18	CHL1
GO:0047485	protein N-terminus binding	molecular_function	0.544724	1	18	CSNK2A2
GO:0005764	lysosome	cellular_component	0.554236	2	43	MYO5A;VPS26A
GO:0005615	extracellular space	cellular_component	0.55831	4	92	ADAMTS7;FRMD4B;GPLD1;LAMB1
GO:0036064	ciliary basal body	cellular_component	0.564257	1	19	OFD1
GO:0045121	membrane raft	cellular_component	0.564257	1	19	TRPC4
GO:0004842	ubiquitin-protein transferase activity	molecular_function	0.571023	3	69	BIRC6;NEURL1;SHPRH
GO:0008234	cysteine-type peptidase activity	molecular_function	0.582958	1	20	SENP7
GO:0003725	double-stranded RNA binding	molecular_function	0.582958	1	20	SUPV3L1
GO:0007399	nervous system development	biological_process	0.582958	1	20	PCDH15
GO:0016746	transferase activity, transferring acyl groups	molecular_function	0.582958	1	20	SOAT1
GO:0008284	positive regulation of cell proliferation	biological_process	0.591365	2	46	BIRC6;CEP131
GO:0043234	protein complex	cellular_component	0.600368	3	72	RYR1;RYR2;TRPC4
GO:1903955	positive regulation of protein targeting to mitochondrion	NA	0.600862	1	21	CSNK2A2
GO:0035264	multicellular organism growth	biological_process	0.600862	1	21	PCDH15
GO:0006606	protein import into nucleus	biological_process	0.600862	1	21	KPNA7
GO:0000226	microtubule cytoskeleton organization	biological_process	0.600862	1	21	MELK
GO:0018105	peptidyl-serine phosphorylation	biological_process	0.603225	2	47	AKT3;PRKCH
GO:0046982	protein heterodimerization activity	molecular_function	0.614825	2	48	MPP7;SYCP2
GO:0007420	brain development	biological_process	0.618002	1	22	SPATA5
GO:0051726	regulation of cell cycle	biological_process	0.618002	1	22	CSNK2A2
GO:0003777	microtubule motor activity	molecular_function	0.618002	1	22	ENSSSCG00000015379
GO:0055037	recycling endosome	cellular_component	0.634413	1	23	MYO5A
GO:0000932	P-body	cellular_component	0.634413	1	23	CNOT3
GO:0007018	microtubule-based movement	biological_process	0.634413	1	23	ENSSSCG00000015379
GO:0004386	helicase activity	molecular_function	0.634413	1	23	TDRD9
GO:0005525	GTP binding	molecular_function	0.648077	2	51	HBS1L;MTIF2
GO:0006396	RNA processing	biological_process	0.650123	1	24	TDRD9
GO:0006974	cellular response to DNA damage stimulus	biological_process	0.658649	2	52	FANCD2;SHPRH
GO:0006511	ubiquitin-dependent protein catabolic process	biological_process	0.658649	2	52	ENSSSCG00000008382;USP24
GO:0000922	spindle pole	cellular_component	0.665163	1	25	BIRC6
GO:0043025	neuronal cell body	cellular_component	0.665163	1	25	MYO5A
GO:0005777	peroxisome	cellular_component	0.665163	1	25	MYO5A
GO:0005759	mitochondrial matrix	cellular_component	0.665163	1	25	SUPV3L1
GO:0008134	transcription factor binding	molecular_function	0.668968	2	53	GTF2B;GTF2F1
GO:0006914	autophagy	biological_process	0.679561	1	26	ATG2B
GO:0006260	DNA replication	biological_process	0.679561	1	26	ENSSSCG00000001493
GO:0005770	late endosome	cellular_component	0.679561	1	26	MYO5A
GO:0005789	endoplasmic reticulum membrane	cellular_component	0.688854	2	55	ITPR3;SOAT1
GO:0005813	centrosome	cellular_component	0.692713	4	109	CEP131;CEP192;IFT52;OFD1
GO:0046983	protein dimerization activity	molecular_function	0.693344	1	27	ENSSSCG00000008909
GO:0005856	cytoskeleton	cellular_component	0.698427	2	56	FRMD4B;WASF1
GO:0030425	dendrite	cellular_component	0.71917	1	29	CHL1
GO:0006457	protein folding	biological_process	0.71917	1	29	FKBP6
GO:0030496	midbody	cellular_component	0.71917	1	29	BIRC6
GO:0008168	methyltransferase activity	molecular_function	0.71917	1	29	NSUN7
GO:0005743	mitochondrial inner membrane	cellular_component	0.725702	2	59	SLC25A13;SLC25A24
GO:0032259	methylation	biological_process	0.731262	1	30	NSUN7
GO:0030036	actin cytoskeleton organization	biological_process	0.731262	1	30	WASF1
GO:0046777	protein autophosphorylation	biological_process	0.731262	1	30	MELK
GO:0016757	transferase activity, transferring glycosyl groups	molecular_function	0.742836	1	31	ART3
GO:0000209	protein polyubiquitination	biological_process	0.742836	1	31	SHPRH
GO:0006897	endocytosis	biological_process	0.742836	1	31	ENSSSCG00000006877
GO:0042127	regulation of cell proliferation	biological_process	0.742836	1	31	BIRC6
GO:0031410	cytoplasmic vesicle	cellular_component	0.753916	1	32	CADPS2
GO:0042803	protein homodimerization activity	molecular_function	0.754664	3	91	CEP131;SLC8B1;SUPV3L1
GO:0005737	cytoplasm	cellular_component	0.754805	29	747	ABCB4;ALPK2;ASTL;ATP1A3;BIRC6;CEP192;DCT;DPYS;ENSSSCG00000008909;ENSSSCG00000011069;FKBP6;FRMD4B;GABBR1;GPLD1;ITPR3;KCNN3;KPNA7;LDHC;MELK;MYO5A;NEURL1;PCDH15;PIWIL2;PRKCH;RYR1;SPATA5;WASF1;WEE2;ZFHX3
GO:0019904	protein domain specific binding	molecular_function	0.774673	1	34	MPP7
GO:0008283	cell proliferation	biological_process	0.784391	1	35	MELK
GO:0016192	vesicle-mediated transport	biological_process	0.793692	1	36	MYO5A
GO:0043209	myelin sheath	cellular_component	0.793692	1	36	ATP1A3
GO:0017137	Rab GTPase binding	molecular_function	0.793692	1	36	MYO5A
GO:0005925	focal adhesion	cellular_component	0.795352	2	68	ABCB4;ITGA6
GO:0003677	DNA binding	molecular_function	0.80469	7	210	ENSSSCG00000001493;ENSSSCG00000008909;GTF2B;GTF2F1;SHPRH;SUPV3L1;ZFHX3
GO:0005794	Golgi apparatus	cellular_component	0.80621	5	156	ATP1A3;BIRC6;MYO5A;NAA25;SORCS1
GO:0006886	intracellular protein transport	biological_process	0.814865	2	71	IPO8;VPS26A
GO:0006629	lipid metabolic process	biological_process	0.819273	1	39	ENSSSCG00000002688
GO:0042802	identical protein binding	molecular_function	0.819842	3	102	FKBP6;OFD1;RYR2
GO:0006412	translation	biological_process	0.834552	1	41	HBS1L
GO:0005102	receptor binding	molecular_function	0.841703	1	42	TENM2
GO:0015031	protein transport	biological_process	0.855098	1	44	KPNA7
GO:0007507	heart development	biological_process	0.867367	1	46	ENSSSCG00000015379
GO:0005783	endoplasmic reticulum	cellular_component	0.876135	4	145	ATP1A3;ITPR3;MYO5A;SOAT1
GO:0000287	magnesium ion binding	molecular_function	0.878605	1	48	WEE2
GO:0016491	oxidoreductase activity	molecular_function	0.885673	2	85	DCT;LDHC
GO:0005739	mitochondrion	cellular_component	0.898318	8	268	MTIF2;SLC25A13;SLC25A24;SLC8B1;SLC9B1;SUPV3L1;TDRD9;WASF1
GO:0003779	actin binding	molecular_function	0.902733	1	53	MYO5A
GO:0061630	ubiquitin protein ligase activity	molecular_function	0.910993	1	55	NEURL1
GO:0055114	oxidation-reduction process	biological_process	0.912882	3	126	DCT;ENSSSCG00000007733;LDHC
GO:0043565	sequence-specific DNA binding	molecular_function	0.922095	1	58	ZFHX3
GO:0031625	ubiquitin protein ligase binding	molecular_function	0.931821	1	61	SHPRH
GO:0006355	regulation of transcription, DNA-templated	biological_process	0.931979	4	166	CNOT3;ENSSSCG00000008909;GTF2B;ZFHX3
GO:0003676	nucleic acid binding	molecular_function	0.93563	5	199	ESRP1;PIWIL2;TDRD10;TDRD9;ZFHX3
GO:0019901	protein kinase binding	molecular_function	0.952255	1	69	RYR2
GO:0005654	nucleoplasm	cellular_component	0.955691	10	361	ABCB4;CADPS2;CDCA2;ESRP1;ITPR3;MPP7;MTIF2;PAPOLG;WEE2;ZFHX3
GO:0008152	metabolic process	biological_process	0.96006	1	73	DCT
GO:0006351	transcription, DNA-templated	biological_process	0.963473	1	75	ENSSSCG00000008909
GO:0003723	RNA binding	molecular_function	0.967374	7	285	GTF2F1;KIAA0907;MTIF2;MYO5A;NSUN7;PAPOLG;SUPV3L1
GO:0016567	protein ubiquitination	biological_process	0.973294	1	82	BIRC6
GO:0045893	positive regulation of transcription, DNA-templated	biological_process	0.976653	1	85	ZFHX3
GO:0000122	negative regulation of transcription from RNA polymerase II promoter	biological_process	0.981345	1	90	ZFHX3
GO:0003700	transcription factor activity, sequence-specific DNA binding	molecular_function	0.983698	1	93	ENSSSCG00000008909
GO:0005730	nucleolus	cellular_component	0.98975	2	149	FANCD2;ITPR3
GO:0045944	positive regulation of transcription from RNA polymerase II promoter	biological_process	0.990532	2	151	GTF2F1;ITGA6
GO:0043547	positive regulation of GTPase activity	biological_process	0.992425	1	110	ITGA6
GO:0005634	nucleus	cellular_component	0.99368	22	779	ATP1A3;CNOT3;CSNK2A2;ENSSSCG00000008909;ENSSSCG00000011069;ESRP1;FANCD2;GTF2B;GTF2F1;ITPR3;KIAA0907;KPNA7;LDHC;MELK;PAPOLG;SENP7;SHPRH;SUPV3L1;TAF1A;TDRD9;WEE2;ZFHX3
GO:0005829	cytosol	cellular_component	0.99604	14	573	ABCB4;CDCA2;CEP192;DCT;DOPEY1;DOPEY2;FANCD2;FKBP6;MYO5A;NAA25;PAPOLG;PRKCH;VPS26A;WEE2
