# Supplementary material for: Circular RNA profiling in the oocyte and cumulus cells reveals that circARMC4 is essential for porcine oocyte maturation
Source: Aging (Albany NY). 2019 Sep 28;11(18):8015–34. doi: 10.18632/aging.102315 (PMC6781969; doi:10.18632/aging.102315)
Supplement: Supplementary Table 7 [file aging-11-102315-s001.xlsx]

## Sheet: KEGG analysis in cumulus cell
Supplementary Table 7. KEGG analysis of host genes producing DECs in cumulus cells.
Pathway_ID	Pathway_Name	Corrected P-value	Diff Genes #	Background Genes #	Involved Genes
ssc04120	Ubiquitin mediated proteolysis	0.00152749	22	39	ANAPC7;BIRC6;BTRC;CUL1;CUL2;ENSSSCG00000008105;ENSSSCG00000015509;ENSSSCG00000022479;ENSSSCG00000022486;FBXW8;HERC1;HERC3;HUWE1;MDM2;TRIM37;UBA1;UBA3;UBE2H;UBE2K;UBE2W;UBE3B;WWP1
ssc05202	Transcriptional misregulation in cancers	0.00451855	14	23	ENSSSCG00000001709;ETV6;FUT8;H3F3A;HDAC2;JMJD1C;KDM6A;MDM2;MLLT1;MLLT3;NR4A3;PBX3;PPARG;SS18
ssc04914	Progesterone-mediated oocyte maturation	0.00579052	16	28	ADCY3;AKT3;ANAPC7;BRAF;CPEB1;CPEB2;CPEB3;CPEB4;ENSSSCG00000008105;ENSSSCG00000021203;GNAI1;MAPK1;MAPK8;PGR;RPS6KA3;RPS6KA6
ssc04320	Dorso-ventral axis formation	0.00698359	7	9	CPEB1;CPEB2;CPEB3;CPEB4;ETV6;MAPK1;SOS2
ssc05166	HTLV-I infection	0.00770088	22	43	ADCY3;AKT3;ANAPC7;CREM;DLG1;ENSSSCG00000008105;ENSSSCG00000013533;ENSSSCG00000021203;ENSSSCG00000027506;EP300;FZD3;GSK3B;IL1R1;JAK3;MAP2K4;MAP3K3;NRP1;RB1;SMAD2;SMAD4;TGFBR1;TRRAP
ssc04114	Oocyte meiosis	0.00783354	17	31	ADCY3;ANAPC7;AR;BTRC;CAMK2D;CPEB1;CPEB2;CPEB3;CPEB4;CUL1;ENSSSCG00000008105;MAPK1;PGR;PPP2R5A;RPS6KA3;RPS6KA6;YWHAQ
ssc05214	Glioma	0.0143444	9	14	AKT3;BRAF;CAMK2D;ENSSSCG00000021203;MAPK1;MDM2;PRKCA;RB1;SOS2
ssc04640	Hematopoietic cell lineage	0.0168046	7	10	CD44;IL1R1;IL4R;ITGA2;ITGA5;KIT;TFRC
ssc05219	Bladder cancer	0.0171187	6	8	BRAF;ENSSSCG00000001695;MAPK1;MDM2;RB1;THBS1
ssc04144	Endocytosis	0.0172037	17	33	ARAP2;ARFGAP3;ARFGEF2;ENSSSCG00000017712;ENSSSCG00000022486;EPS15;GBF1;KIT;MDM2;PLD1;RUFY1;SH3GLB1;SMAD2;TFRC;TGFBR1;WWP1;ZFYVE9
ssc04919	Thyroid hormone signaling pathway	0.0175865	19	38	ACTG1;AKT3;ATP1A1;ENSSSCG00000009464;ENSSSCG00000009465;ENSSSCG00000017672;ENSSSCG00000021203;EP300;ESR1;GSK3B;HDAC2;ITGAV;MAPK1;MDM2;MED14;MED27;NCOA1;NCOA3;PRKCA
ssc05220	Chronic myeloid leukemia	0.019328	11	19	AKT3;BRAF;ENSSSCG00000021203;ENSSSCG00000022486;HDAC2;MAPK1;MDM2;RB1;SMAD4;SOS2;TGFBR1
ssc05210	Colorectal cancer	0.0223383	10	17	AKT3;BRAF;ENSSSCG00000021203;GSK3B;MAPK1;MAPK8;MSH3;SMAD2;SMAD4;TGFBR1
ssc05205	Proteoglycans in cancer	0.022806	23	49	ACTG1;AKT3;ANK2;ANK3;ARHGEF12;BRAF;CAMK2D;CD44;ENSSSCG00000001695;ENSSSCG00000021203;ENSSSCG00000022486;ESR1;FZD3;ITGA2;ITGA5;ITGAV;MAPK1;MDM2;PDCD4;PRKCA;SOS2;THBS1;TIAM1
ssc05200	Pathways in cancer	0.0230154	31	70	ADCY3;AKT3;AR;ARHGEF12;BRAF;CCDC6;CUL2;ENSSSCG00000001695;ENSSSCG00000008250;ENSSSCG00000015556;ENSSSCG00000021203;ENSSSCG00000022486;EP300;FZD3;GNAI1;GSK3B;HDAC2;ITGA2;ITGAV;KIT;MAPK1;MAPK8;MDM2;MSH3;PPARG;PRKCA;RB1;SMAD2;SMAD4;SOS2;TGFBR1
ssc04015	Rap1 signaling pathway	0.0242118	19	39	ACTG1;ADCY3;AFDN;AKT3;BRAF;ENSSSCG00000001695;ENSSSCG00000021203;GNAI1;KIT;KRIT1;MAGI1;MAPK1;PRKCA;PRKD2;PRKD3;RAPGEF2;SIPA1L2;THBS1;TIAM1
ssc04530	Tight junction	0.0243344	17	34	ACTG1;AFDN;AKT3;CASK;CSNK2A2;ENSSSCG00000004199;ENSSSCG00000006508;ENSSSCG00000008250;ENSSSCG00000016543;EPB41L1;GNAI1;MAGI1;MYH10;MYH9;PRKCA;PRKCE;YBX3
ssc05223	Non-small cell lung cancer	0.0257241	9	15	AKT3;BRAF;EML4;ENSSSCG00000021203;FOXO3;MAPK1;PRKCA;RB1;SOS2
ssc04068	FoxO signaling pathway	0.0286529	16	32	AKT3;BNIP3;BRAF;ENSSSCG00000000644;ENSSSCG00000021203;EP300;FOXO3;HOMER2;MAPK1;MAPK8;MDM2;SGK1;SMAD2;SMAD4;SOS2;TGFBR1
ssc05414	Dilated cardiomyopathy(DCM)	0.0294603	8	13	ACTG1;ADCY3;CACNA2D1;CACNB1;ITGA2;ITGA5;ITGAV;RYR2
ssc04010	MAPK signaling pathway	0.0312812	21	45	AKT3;BRAF;CACNA2D1;CACNB1;ENSSSCG00000008475;ENSSSCG00000017790;IL1R1;MAP2K4;MAP3K2;MAP3K3;MAP4K4;MAPK1;MAPK8;MKNK1;NF1;PRKCA;RAPGEF2;RPS6KA3;RPS6KA6;SOS2;TGFBR1
ssc04722	Neurotrophin signaling pathway	0.0330264	13	25	AKT3;BRAF;CAMK2D;ENSSSCG00000021203;FOXO3;GSK3B;MAP3K3;MAPK1;MAPK8;PSEN1;RPS6KA3;RPS6KA6;SOS2
ssc05410	Hypertrophic cardiomyopathy(HCM)	0.0334422	7	11	ACTG1;CACNA2D1;CACNB1;ITGA2;ITGA5;ITGAV;RYR2
ssc04350	TGF-beta signaling pathway	0.0359936	10	18	ACVR1;CUL1;EP300;MAPK1;RBL1;SMAD2;SMAD4;TGFBR1;THBS1;ZFYVE9
ssc04310	Wnt signaling pathway	0.0394286	16	33	BTRC;CAMK2D;CSNK1A1L;CSNK2A2;CUL1;DAAM1;EP300;FZD3;GPC4;GSK3B;MAPK8;PRICKLE2;PRKCA;PSEN1;SENP2;SMAD4
ssc04390	Hippo signaling pathway	0.0398336	14	28	ACTG1;BTRC;DLG1;ENSSSCG00000008250;ENSSSCG00000028707;FZD3;GSK3B;MOB1B;SMAD2;SMAD4;TGFBR1;TP53BP2;YAP1;YWHAQ
ssc05412	Arrhythmogenic right ventricular cardiomyopathy(ARVC)	0.0422571	9	16	ACTG1;CACNA2D1;CACNB1;DSP;ENSSSCG00000008250;ITGA2;ITGA5;ITGAV;RYR2
ssc04917	Prolactin signaling pathway	0.0422571	9	16	AKT3;ENSSSCG00000021203;ESR1;FOXO3;GSK3B;JAK2;MAPK1;MAPK8;SOS2
ssc00562	Inositol phosphate metabolism	0.054511	10	19	ENSSSCG00000010525;ENSSSCG00000021203;ENSSSCG00000030707;INPP4B;INPP5B;INPPL1;MINPP1;MTM1;OCRL;PI4KA
ssc04550	Signaling pathways regulating pluripotency of stem cells	0.0647189	13	27	ACVR1;AKT3;ENSSSCG00000021203;FZD3;GSK3B;IL6ST;JAK2;JAK3;MAPK1;RIF1;SMAD2;SMAD4;SMARCAD1
ssc05164	Influenza A	0.0765492	12	25	ACTG1;AKT3;EIF2S1;ENSSSCG00000021203;EP300;GSK3B;JAK2;KPNA1;MAP2K4;MAPK1;MAPK8;NUP98
ssc05215	Prostate cancer	0.0783554	10	20	AKT3;AR;BRAF;ENSSSCG00000021203;EP300;GSK3B;MAPK1;MDM2;RB1;SOS2
ssc04960	Aldosterone-regulated sodium reabsorption	0.0797505	5	8	ATP1A1;ENSSSCG00000021203;MAPK1;PRKCA;SGK1
ssc04151	PI3K-Akt signaling pathway	0.0806448	21	49	AKT3;ENSSSCG00000001695;ENSSSCG00000015556;ENSSSCG00000021203;FOXO3;GSK3B;IL4R;ITGA2;ITGA5;ITGAV;JAK2;JAK3;KIT;MAPK1;MDM2;PKN2;PPP2R5A;SGK1;SOS2;THBS1;YWHAQ
ssc04630	Jak-STAT signaling pathway	0.0907075	11	23	AKT3;ENSSSCG00000021203;ENSSSCG00000022486;ENSSSCG00000026524;EP300;IL4R;IL6ST;JAK2;JAK3;SOS2;SPRED1
ssc04060	Cytokine-cytokine receptor interaction	0.0918039	7	13	ACVR1;ENSSSCG00000001695;IL1R1;IL4R;IL6ST;KIT;TGFBR1
ssc04916	Melanogenesis	0.0933377	9	18	ADCY3;CAMK2D;EP300;FZD3;GNAI1;GSK3B;KIT;MAPK1;PRKCA
ssc04912	GnRH signaling pathway	0.0933377	9	18	ADCY3;CAMK2D;MAP2K4;MAP3K2;MAP3K3;MAPK1;MAPK8;PLD1;SOS2
ssc05169	Epstein-Barr virus infection	0.101768	18	42	AKT3;CD44;CSNK2A2;ENSSSCG00000017366;ENSSSCG00000021203;EP300;GSK3B;HDAC2;JAK3;MAP2K4;MAPK8;MDM2;NUP214;PSMC6;PSMD14;RB1;VIM;YWHAQ
ssc05218	Melanoma	0.110053	6	11	AKT3;BRAF;ENSSSCG00000021203;MAPK1;MDM2;RB1
ssc04024	cAMP signaling pathway	0.111	16	37	ADCY3;AFDN;AKT3;ATP1A1;BRAF;CAMK2D;ENSSSCG00000009495;ENSSSCG00000021203;EP300;GNAI1;HTR4;MAPK1;MAPK8;PLD1;RYR2;TIAM1
ssc05213	Endometrial cancer	0.11158	8	16	AKT3;BRAF;ENSSSCG00000008250;ENSSSCG00000021203;FOXO3;GSK3B;MAPK1;SOS2
ssc05161	Hepatitis B	0.111869	13	29	AKT3;ENSSSCG00000000884;ENSSSCG00000021203;ENSSSCG00000026524;EP300;MAP2K4;MAPK1;MAPK8;PRKCA;RB1;SMAD4;TGFBR1;YWHAQ
ssc05152	Tuberculosis	0.120365	11	24	AKT3;ARHGEF12;CAMK2D;CTSS;ENSSSCG00000000884;EP300;JAK2;LAMP2;MAPK1;MAPK8;NFYC
ssc04145	Phagosome	0.120365	11	24	ACTG1;CTSS;DYNC1I2;ENSSSCG00000011114;ITGA2;ITGA5;ITGAV;LAMP2;SCARB1;TFRC;THBS1
ssc04014	Ras signaling pathway	0.12917	15	35	AFDN;AKT3;ENSSSCG00000001695;ENSSSCG00000021203;EXOC2;KIT;MAPK1;MAPK8;NF1;PLD1;PRKCA;RASA3;RGL1;SOS2;TIAM1
ssc05206	MicroRNAs in cancer	0.12917	15	35	CD44;ENSSSCG00000001695;EP300;FZD3;GLS;ITGA5;MDM2;MDM4;MMP16;PDCD4;PRKCA;PRKCE;SOS2;THBS1;VIM
ssc04110	Cell cycle	0.12917	15	35	ANAPC7;CUL1;ENSSSCG00000008105;EP300;GSK3B;HDAC2;MDM2;ORC5;PRKDC;RB1;RBL1;SMAD2;SMAD4;WEE1;YWHAQ
ssc04062	Chemokine signaling pathway	0.131526	12	27	ADCY3;AKT3;BRAF;ENSSSCG00000021203;FOXO3;GNAI1;GSK3B;JAK2;JAK3;MAPK1;SOS2;TIAM1
ssc00380	Tryptophan metabolism	0.132703	5	9	ACAT1;AOX1;HADHA;MAOB;OGDH
ssc04710	Circadian rhythm	0.132703	5	9	BTRC;CUL1;ENSSSCG00000008171;ENSSSCG00000008909;ENSSSCG00000013397
ssc04720	Long-term potentiation	0.133993	7	14	BRAF;CAMK2D;EP300;MAPK1;PRKCA;RPS6KA3;RPS6KA6
ssc05212	Pancreatic cancer	0.142524	10	22	AKT3;BRAF;ENSSSCG00000001695;ENSSSCG00000021203;MAPK1;MAPK8;RB1;SMAD2;SMAD4;TGFBR1
ssc04150	mTOR signaling pathway	0.142524	10	22	AKT3;BRAF;ENSSSCG00000001695;ENSSSCG00000021203;MAPK1;PRKCA;RICTOR;RPS6KA3;RPS6KA6;RRAGD
ssc04725	Cholinergic synapse	0.153281	8	17	ADCY3;AKT3;CAMK2D;ENSSSCG00000021203;GNAI1;JAK2;MAPK1;PRKCA
ssc04070	Phosphatidylinositol signaling system	0.154791	11	25	DGKH;ENSSSCG00000010525;ENSSSCG00000021203;ENSSSCG00000030707;INPP4B;INPP5B;INPPL1;MTM1;OCRL;PI4KA;PRKCA
ssc04012	ErbB signaling pathway	0.154791	11	25	AKT3;BRAF;CAMK2D;ENSSSCG00000021203;ENSSSCG00000022486;GSK3B;MAP2K4;MAPK1;MAPK8;PRKCA;SOS2
ssc04510	Focal adhesion	0.158221	15	36	ACTG1;AKT3;BRAF;ENSSSCG00000001695;ENSSSCG00000015556;ENSSSCG00000021203;GSK3B;ITGA2;ITGA5;ITGAV;MAPK1;MAPK8;PRKCA;SOS2;THBS1
ssc05134	Legionellosis	0.161321	4	7	BCL2L13;BNIP3;ENSSSCG00000000884;HBS1L
ssc04512	ECM-receptor interaction	0.161871	6	12	CD44;ENSSSCG00000015556;ITGA2;ITGA5;ITGAV;THBS1
ssc04664	Fc epsilon RI signaling pathway	0.161871	6	12	AKT3;ENSSSCG00000021203;MAP2K4;MAPK1;MAPK8;SOS2
ssc00640	Propanoate metabolism	0.161871	6	12	ACACA;ACACB;ACADM;ACAT1;ACSS3;HADHA
ssc05222	Small cell lung cancer	0.183934	7	15	AKT3;ENSSSCG00000000884;ENSSSCG00000015556;ENSSSCG00000021203;ITGA2;ITGAV;RB1
ssc05321	Inflammatiory bowel disease(IBD)	0.198495	3	5	ENSSSCG00000026524;IL4R;SMAD2
ssc00512	Mucin type O-glycan biosynthesis	0.198495	3	5	ENSSSCG00000015341;GALNT11;GALNT2
ssc04727	GABAergic synapse	0.201235	8	18	ADCY3;ENSSSCG00000000644;GABRA4;GLS;GNAI1;GPHN;PRKCA;SLC38A1
ssc04726	Serotonergic synapse	0.201235	8	18	BRAF;ENSSSCG00000010488;GNAI1;HTR4;MAOB;MAPK1;PRKCA;SLC6A4
ssc04662	B cell receptor signaling pathway	0.221928	6	13	AKT3;ENSSSCG00000021203;GSK3B;INPPL1;MAPK1;SOS2
ssc04540	Gap junction	0.221928	6	13	ADCY3;GNAI1;MAP3K2;MAPK1;PRKCA;SOS2
ssc05168	Herpes simplex infection	0.226681	10	24	CSNK2A2;CUL1;EIF2S1;ENSSSCG00000008909;ENSSSCG00000013397;EP300;GTF2I;JAK2;MAPK8;SRPK1
ssc04066	HIF-1 signaling pathway	0.226681	10	24	AKT3;CAMK2D;CUL2;ENSSSCG00000001695;ENSSSCG00000021203;EP300;MAPK1;MKNK1;PRKCA;TFRC
ssc05160	Hepatitis C	0.226681	10	24	AKT3;BRAF;EIF2S1;ENSSSCG00000021203;GSK3B;MAPK1;MAPK8;NR1H3;SCARB1;SOS2
ssc05162	Measles	0.240209	7	16	AKT3;CSNK2A2;EIF2S1;ENSSSCG00000021203;GSK3B;JAK2;JAK3
ssc00565	Ether lipid metabolism	0.242892	4	8	CEPT1;PAFAH1B1;PLA2G7;PLD1
ssc05216	Thyroid cancer	0.242892	4	8	BRAF;CCDC6;MAPK1;PPARG
ssc04261	Adrenergic signaling in cardiomyocytes	0.244514	12	30	ADCY3;AKT3;ATP1A1;CACNA2D1;CACNB1;CAMK2D;CREM;ENSSSCG00000021203;GNAI1;MAPK1;PPP2R5A;RYR2
ssc00130	Ubiquinone and other terpenoid-quinone biosynthesis	0.24917	2	3	COQ6;GGCX
ssc00072	Synthesis and degradation of ketone bodies	0.24917	2	3	ACAT1;FAR1
ssc04740	Olfactory transduction	0.24917	2	3	ADCY3;CAMK2D
ssc00760	Nicotinate and nicotinamide metabolism	0.24917	2	3	AOX1;NNT
ssc05211	Renal cell carcinoma	0.254292	8	19	AKT3;BRAF;CUL2;ENSSSCG00000001695;ENSSSCG00000021203;EP300;MAPK1;SOS2
ssc04724	Glutamatergic synapse	0.254292	8	19	ADCY3;GLS;GNAI1;HOMER2;MAPK1;PLD1;PRKCA;SLC38A1
ssc04750	Inflammatory mediator regulation of TRP channels	0.254292	8	19	ADCY3;CAMK2D;ENSSSCG00000010488;ENSSSCG00000021203;IL1R1;MAPK8;PRKCA;PRKCE
ssc05142	Chagas disease(American trypanosomiasis)	0.26549	9	22	AKT3;CFLAR;ENSSSCG00000021203;GNAI1;MAP2K4;MAPK1;MAPK8;SMAD2;TGFBR1
ssc04115	p53 signaling pathway	0.269713	5	11	ENSSSCG00000000884;ENSSSCG00000015509;MDM2;MDM4;THBS1
ssc04520	Adherens junction	0.274608	10	25	ACTG1;AFDN;CSNK2A2;ENSSSCG00000008250;EP300;MAPK1;NECTIN3;SMAD2;SMAD4;TGFBR1
ssc05221	Acute myeloid leukemia	0.287879	6	14	AKT3;BRAF;ENSSSCG00000021203;KIT;MAPK1;SOS2
ssc04723	Retrograde endocannabinoid signaling	0.301059	7	17	ABHD6;ADCY3;GABRA4;GNAI1;MAPK1;MAPK8;PRKCA
ssc03060	Protein export	0.304649	3	6	ENSSSCG00000011114;HSPA5;SEC63
ssc05034	Alcoholism	0.311067	8	20	BRAF;ENSSSCG00000017366;GNAI1;H3F3A;HDAC2;MAOB;MAPK1;SOS2
ssc00790	Folate biosynthesis	0.325885	1	1	GGH
ssc04130	SNARE interactions in vesicular transport	0.325885	1	1	STX17
ssc00750	Vitamin B6 metabolism	0.325885	1	1	AOX1
ssc04260	Cardiac muscle contraction	0.331043	4	9	ATP1A1;CACNA2D1;CACNB1;RYR2
ssc00620	Pyruvate metabolism	0.331043	4	9	ACACA;ACACB;ACAT1;ME1
ssc04923	Regulation of lipolysis in adipocyte	0.331043	4	9	ADCY3;AKT3;ENSSSCG00000021203;GNAI1
ssc04650	Natural killer cell mediated cytotoxicity	0.346743	5	12	BRAF;ENSSSCG00000021203;MAPK1;PRKCA;SOS2
ssc04620	Toll-like receptor signaling pathway	0.346743	5	12	AKT3;ENSSSCG00000021203;MAP2K4;MAPK1;MAPK8
ssc05145	Toxoplasmosis	0.364583	7	18	AKT3;ENSSSCG00000015556;ENSSSCG00000021203;GNAI1;JAK2;MAPK1;MAPK8
ssc04915	Estrogen signaling pathway	0.37007	8	21	ADCY3;AKT3;ENSSSCG00000001549;ENSSSCG00000021203;ESR1;GNAI1;MAPK1;SOS2
ssc03008	Ribosome biogenesis in eukaryotes	0.374257	9	24	CSNK2A2;GNL3L;HEATR1;LSG1;NOB1;SPATA5;UTP6;XRN1;XRN2
ssc05231	Choline metabolism in cancer	0.374257	9	24	AKT3;DGKH;ENSSSCG00000021203;MAPK1;MAPK8;PCYT1A;PLD1;PRKCA;SOS2
ssc04932	Non-alcoholic fatty liver disease(NAFLD)	0.374257	9	24	AKT3;EIF2S1;ENSSSCG00000021203;GSK3B;MAPK8;MLXIP;NDUFS2;NDUFV2;NR1H3
ssc04728	Dopaminergic synapse	0.380095	11	30	AKT3;CAMK2D;ENSSSCG00000008909;ENSSSCG00000013397;GNAI1;GSK3B;KIF5B;MAOB;MAPK8;PPP2R5A;PRKCA
ssc04910	Insulin signaling pathway	0.38215	12	33	ACACA;ACACB;AKT3;BRAF;ENSSSCG00000021203;ENSSSCG00000022486;GSK3B;INPPL1;MAPK1;MAPK8;MKNK1;SOS2
ssc00524	Butirosin and neomycin biosynthesis	0.394148	2	4	ACACA;ACACB
ssc05020	Prion diseases	0.394148	2	4	HSPA5;MAPK1
ssc00350	Tyrosine metabolism	0.394148	2	4	AOX1;MAOB
ssc00061	Fatty acid biosynthesis	0.394148	2	4	ACACA;ACACB
ssc04330	Notch signaling pathway	0.412145	3	7	EP300;HDAC2;PSEN1
ssc04978	Mineral absorption	0.412145	3	7	ATP1A1;HMOX2;TRPM7
ssc00830	Retinol metabolism	0.412145	3	7	AOX1;ENSSSCG00000010488;RDH11
ssc05133	Pertussis	0.420312	4	10	GNAI1;ITGA5;MAPK1;MAPK8
ssc04930	Type II diabetes mellitus	0.420312	4	10	ENSSSCG00000021203;MAPK1;MAPK8;PRKCE
ssc04514	Cell adhesion molecules(CAMs)	0.420312	4	10	ITGAV;MPZL1;NECTIN3;VCAN
ssc04961	Endocrine and other factor-regulated calcium reabsorption	0.420312	4	10	ATP1A1;ENSSSCG00000017712;ESR1;PRKCA
ssc04210	Apoptosis	0.424752	5	13	AKT3;CFLAR;ENSSSCG00000000884;ENSSSCG00000021203;IL1R1
ssc04270	Vascular smooth muscle contraction	0.427357	6	16	ADCY3;ARHGEF12;BRAF;MAPK1;PRKCA;PRKCE
ssc04380	Osteoclast differentiation	0.428919	7	19	AKT3;ENSSSCG00000021203;IL1R1;MAPK1;MAPK8;PPARG;TGFBR1
ssc05203	Viral carcinogenesis	0.429518	14	40	DLG1;DNAJA3;ENSSSCG00000003488;ENSSSCG00000017366;ENSSSCG00000021203;EP300;HDAC2;IL6ST;JAK3;MAPK1;MDM2;RB1;RBL1;YWHAQ
ssc04071	Sphingolipid signaling pathway	0.43031	9	25	AKT3;ENSSSCG00000021203;GNAI1;MAPK1;MAPK8;PLD1;PPP2R5A;PRKCA;PRKCE
ssc04611	Platelet activation	0.43031	9	25	ACTG1;ADCY3;AKT3;ARHGEF12;ENSSSCG00000021203;GNAI1;ITGA2;MAPK1;STIM1
ssc04921	Oxytocin signaling pathway	0.430488	10	28	ACTG1;ADCY3;CACNA2D1;CACNB1;CAMK2D;ENSSSCG00000021203;GNAI1;MAPK1;PRKCA;RYR2
ssc05016	Huntington's disease	0.483176	10	29	DNAH10;ENSSSCG00000000884;ENSSSCG00000015379;ENSSSCG00000017712;EP300;HDAC2;HTT;NDUFS2;NDUFV2;PPARG
ssc04660	T cell receptor signaling pathway	0.492378	7	20	AKT3;DLG1;ENSSSCG00000021203;ENSSSCG00000022486;GSK3B;MAPK1;SOS2
ssc00310	Lysine degradation	0.496247	6	17	ACAT1;ENSSSCG00000006508;HADHA;NSD3;OGDH;SETD2
ssc01212	Fatty acid metabolism	0.496247	6	17	ACACA;ACACB;ACADM;ACAT1;FADS1;HADHA
ssc04713	Circadian entrainment	0.496247	6	17	ADCY3;CAMK2D;GNAI1;MAPK1;PRKCA;RYR2
ssc04971	Gastric acid secretion	0.500793	5	14	ADCY3;ATP1A1;CAMK2D;GNAI1;PRKCA
ssc05132	Salmonella infection	0.500793	5	14	ACTG1;DYNC1I2;MAPK1;MAPK8;PKN2
ssc04370	VEGF signaling pathway	0.500793	5	14	AKT3;ENSSSCG00000001695;ENSSSCG00000021203;MAPK1;PRKCA
ssc05032	Morphine addiction	0.500793	5	14	ADCY3;GABRA4;GNAI1;PDE8A;PRKCA
ssc00330	Arginine and proline metabolism	0.500793	5	14	ALDH18A1;GLS;MAOB;P4HA2;SMS
ssc04064	NF-kappa B signaling pathway	0.506369	4	11	CFLAR;CSNK2A2;ERC1;IL1R1
ssc00410	beta-Alanine metabolism	0.513697	3	8	ACADM;HADHA;SMS
ssc00630	Glyoxylate and dicarboxylate metabolism	0.524584	2	5	ACAT1;ACO1
ssc00982	Drug metabolism - cytochrome P450	0.524584	2	5	AOX1;MAOB
ssc00140	Steroid hormone biosynthesis	0.524584	2	5	ENSSSCG00000010488;SRD5A3
ssc03410	Base excision repair	0.524584	2	5	ENSSSCG00000027506;PARP1
ssc00650	Butanoate metabolism	0.524584	2	5	ACAT1;HADHA
ssc00531	Glycosaminoglycan degradation	0.545773	1	2	HEXA
ssc00040	Pentose and glucuronate interconversions	0.545773	1	2	UGDH
ssc00603	Glycosphingolipid biosynthesis - globo series	0.545773	1	2	HEXA
ssc00532	Glycosaminoglycan biosynthesis - chondroitin sulfate / dermatan sulfate	0.545773	1	2	CHST15
ssc00053	Ascorbate and aldarate metabolism	0.545773	1	2	UGDH
ssc05143	African trypanosomiasis	0.545773	1	2	PRKCA
ssc00533	Glycosaminoglycan biosynthesis - keratan sulfate	0.545773	1	2	FUT8
ssc00471	D-Glutamine and D-glutamate metabolism	0.545773	1	2	GLS
ssc05144	Malaria	0.545773	1	2	THBS1
ssc00730	Thiamine metabolism	0.545773	1	2	TPK1
ssc05010	Alzheimer's disease	0.546348	8	24	ADAM10;ENSSSCG00000000884;ENSSSCG00000006346;GSK3B;MAPK1;NDUFS2;NDUFV2;PSEN1
ssc04666	Fc gamma R-mediated phagocytosis	0.553532	7	21	AKT3;ENSSSCG00000021203;INPPL1;MAPK1;PLD1;PRKCA;PRKCE
ssc04668	TNF signaling pathway	0.56208	6	18	AKT3;CFLAR;ENSSSCG00000021203;MAP2K4;MAPK1;MAPK8
ssc04976	Bile secretion	0.572601	5	15	ABCC2;ADCY3;ATP1A1;ENSSSCG00000009495;SCARB1
ssc02010	ABC transporters	0.586182	4	12	ABCA7;ABCC2;ABCD3;ENSSSCG00000009495
ssc00250	Alanine, aspartate and glutamate metabolism	0.605024	3	9	GLS;GPT2;PPAT
ssc04340	Hedgehog signaling pathway	0.605024	3	9	BTRC;CSNK1A1L;GSK3B
ssc04621	NOD-like receptor signaling pathway	0.605024	3	9	MAPK1;MAPK8;SUGT1
ssc00500	Starch and sucrose metabolism	0.605024	3	9	GANC;GPI;UGDH
ssc05140	Leishmaniasis	0.634551	2	6	JAK2;MAPK1
ssc04964	Proximal tubule bicarbonate reclamation	0.634551	2	6	ATP1A1;GLS
ssc04913	Ovarian Steroidogenesis	0.634551	2	6	ADCY3;SCARB1
ssc01210	2-Oxocarboxylic acid metabolism	0.634551	2	6	ACO1;GPT2
ssc04911	Insulin secretion	0.63862	5	16	ADCY3;ATP1A1;CAMK2D;PRKCA;RYR2
ssc05230	Central carbon metabolism in cancer	0.63862	5	16	AKT3;ENSSSCG00000021203;GLS;KIT;MAPK1
ssc04810	Regulation of actin cytoskeleton	0.657042	12	39	ACTG1;ARHGEF12;BRAF;CYFIP2;ENSSSCG00000021203;ITGA2;ITGA5;ITGAV;MAPK1;SOS2;SSH1;TIAM1
ssc00280	Valine, leucine and isoleucine degradation	0.657928	4	13	ACADM;ACAT1;AOX1;HADHA
ssc04360	Axon guidance	0.664754	7	23	ARHGEF12;EFNB2;ENSSSCG00000012001;GNAI1;GSK3B;MAPK1;NRP1
ssc04670	Leukocyte transendothelial migration	0.67975	6	20	ACTG1;AFDN;ENSSSCG00000008250;ENSSSCG00000021203;GNAI1;PRKCA
ssc01200	Carbon metabolism	0.686726	9	30	ACADM;ACAT1;ACO1;GPI;GPT2;HADHA;ME1;OGDH;TALDO1
ssc05033	Nicotine addiction	0.694075	1	3	GABRA4
ssc00860	Porphyrin and chlorophyll metabolism	0.694075	1	3	HMOX2
ssc00450	Selenocompound metabolism	0.694075	1	3	ENSSSCG00000025315
ssc00340	Histidine metabolism	0.694075	1	3	MAOB
ssc00260	Glycine, serine and threonine metabolism	0.694075	1	3	MAOB
ssc04975	Fat digestion and absorption	0.694075	1	3	SCARB1
ssc00360	Phenylalanine metabolism	0.694075	1	3	MAOB
ssc00604	Glycosphingolipid biosynthesis - ganglio series	0.694075	1	3	HEXA
ssc00591	Linoleic acid metabolism	0.694075	1	3	ENSSSCG00000010488
ssc05100	Bacterial invasion of epithelial cells	0.697942	5	17	ACTG1;ENSSSCG00000008250;ENSSSCG00000021203;ENSSSCG00000022486;ITGA5
ssc00240	Pyrimidine metabolism	0.697942	5	17	CTPS2;ENSSSCG00000001493;ENSSSCG00000027506;ENTPD5;POLR1A
ssc00510	N-Glycan biosynthesis	0.720783	4	14	ALG6;FUT8;MGAT4A;STT3B
ssc03450	Non-homologous end-joining	0.723513	2	7	PRKDC;XRCC5
ssc05217	Basal cell carcinoma	0.723513	2	7	FZD3;GSK3B
ssc00590	Arachidonic acid metabolism	0.723513	2	7	ENSSSCG00000010488;PTGES3
ssc00561	Glycerolipid metabolism	0.723513	2	7	DGKH;MBOAT1
ssc03430	Mismatch repair	0.723513	2	7	ENSSSCG00000027506;MSH3
ssc00230	Purine metabolism	0.7286	9	31	ADCY3;ADK;ENSSSCG00000001493;ENSSSCG00000003808;ENSSSCG00000027506;ENTPD5;PDE8A;POLR1A;PPAT
ssc03018	RNA degradation	0.730238	6	21	CNOT1;PABPC1;PAN3;SKIV2L2;XRN1;XRN2
ssc04918	Thyroid hormone synthesis	0.750197	5	18	ADCY3;ATP1A1;ENSSSCG00000015844;HSPA5;PRKCA
ssc04970	Salivary secretion	0.750868	3	11	ADCY3;ATP1A1;PRKCA
ssc04973	Carbohydrate digestion and absorption	0.750868	3	11	AKT3;ATP1A1;ENSSSCG00000021203
ssc00071	Fatty acid degradation	0.750868	3	11	ACADM;ACAT1;HADHA
ssc04974	Protein digestion and absorption	0.750868	3	11	ATP1A1;COL14A1;PRCP
ssc05031	Amphetamine addiction	0.750868	3	11	CAMK2D;MAOB;PRKCA
ssc04730	Long-term depression	0.774667	4	15	BRAF;GNAI1;MAPK1;PRKCA
ssc04972	Pancreatic secretion	0.774667	4	15	ADCY3;ATP1A1;PRKCA;RYR2
ssc01040	Biosynthesis of unsaturated fatty acids	0.793451	2	8	FADS1;HADHA
ssc03050	Proteasome	0.793451	2	8	PSMC6;PSMD14
ssc00480	Glutathione metabolism	0.793451	2	8	ENSSSCG00000015844;SMS
ssc03010	Ribosome	0.793451	2	8	RPL17;RPS10
ssc04962	Vasopressin-regulated water reabsorption	0.793451	2	8	ADCY3;DYNC1I2
ssc00020	Citrate cycle(TCA cycle)	0.793451	2	8	ACO1;OGDH
ssc05322	Systemic lupus erythematosus	0.79405	1	4	H3F3A
ssc00514	Other types of O-glycan biosynthesis	0.79405	1	4	B3GLCT
ssc05014	Amyotrophic lateral sclerosis(ALS)	0.79405	1	4	ENSSSCG00000000884
ssc04977	Vitamin digestion and absorption	0.79405	1	4	SCARB1
ssc04020	Calcium signaling pathway	0.813714	6	23	ADCY3;CAMK2D;HTR4;PRKCA;RYR2;STIM1
ssc04152	AMPK signaling pathway	0.814552	8	30	ACACA;ACACB;AKT3;ENSSSCG00000021203;FOXO3;PPARG;PPP2R5A;RAB14
ssc05146	Amoebiasis	0.820016	4	16	ENSSSCG00000015556;ENSSSCG00000021203;IL1R1;PRKCA
ssc00564	Glycerophospholipid metabolism	0.833993	5	20	CEPT1;DGKH;MBOAT1;PCYT1A;PLD1
ssc05030	Cocaine addiction	0.847288	2	9	GNAI1;MAOB
ssc00030	Pentose phosphate pathway	0.847288	2	9	GPI;TALDO1
ssc04612	Antigen processing and presentation	0.847288	2	9	CTSS;NFYC
ssc04920	Adipocytokine signaling pathway	0.850114	3	13	AKT3;JAK2;MAPK8
ssc00511	Other glycan degradation	0.861417	1	5	HEXA
ssc00563	GlycosylphosphatidylinositolGPI-anchor biosynthesis)	0.861417	1	5	PIGN
ssc00062	Fatty acid elongation	0.861417	1	5	HADHA
ssc00100	Steroid biosynthesis	0.861417	1	5	SOAT1
ssc03020	RNA polymerase	0.861417	1	5	POLR1A
ssc03015	mRNA surveillance pathway	0.866417	5	21	ENSSSCG00000017826;HBS1L;PABPC1;PCF11;PPP2R5A
ssc05012	Parkinson's disease	0.866417	5	21	ENSSSCG00000000884;GNAI1;NDUFS2;NDUFV2;UBA1
ssc04922	Glucagon signaling pathway	0.875484	6	25	ACACA;ACACB;AKT3;CAMK2D;EP300;PPP4R3B
ssc03013	RNA transport	0.879932	11	43	CYFIP2;EIF2B3;EIF2S1;ENSSSCG00000000486;ENSSSCG00000023884;NUP188;NUP214;NUP85;NUP98;PABPC1;SENP2
ssc03320	PPAR signaling pathway	0.885386	3	14	ACADM;NR1H3;PPARG
ssc04140	Regulation of autophagy	0.888063	2	10	ATG16L1;ENSSSCG00000000644
ssc03030	DNA replication	0.888063	2	10	ENSSSCG00000001493;ENSSSCG00000027506
ssc01230	Biosynthesis of amino acids	0.888256	4	18	ACO1;ALDH18A1;GPT2;TALDO1
ssc04022	cGMP - PKG signaling pathway	0.892719	8	33	ADCY3;AKT3;ATP1A1;ENSSSCG00000021203;GNAI1;GTF2I;MAPK1;PRKCE
ssc04141	Protein processing in endoplasmic reticulum	0.906545	12	48	CUL1;EIF2S1;ENSSSCG00000006346;ENSSSCG00000009502;ENSSSCG00000011114;ENSSSCG00000015857;HSPA5;MAPK8;MBTPS2;SEC63;STT3B;TRAM1
ssc05204	Chemical carcinogenesis	0.90679	1	6	ENSSSCG00000010488
ssc00520	Amino sugar and nucleotide sugar metabolism	0.913066	3	15	GPI;HEXA;UGDH
ssc03022	Basal transcription factors	0.918551	2	11	GTF2F1;GTF2I
ssc05416	Viral myocarditis	0.937337	1	7	ACTG1
ssc00270	Cysteine and methionine metabolism	0.937337	1	7	SMS
ssc00010	Glycolysis / Gluconeogenesis	0.941109	2	12	GPI;MINPP1
ssc04080	Neuroactive ligand-receptor interaction	0.941109	2	12	GABRA4;HTR4
ssc03040	Spliceosome	0.947947	5	25	AQR;DHX15;EFTUD2;ENSSSCG00000028663;PRPF40A
ssc00900	Terpenoid backbone biosynthesis	0.957892	1	8	ACAT1
ssc04146	Peroxisome	0.959526	5	26	ABCD3;CROT;FAR1;PEX14;SLC25A17
ssc04142	Lysosome	0.968645	7	35	AP1G1;AP1S2;CTSH;CTSS;HEXA;LAMP2;NPC1
ssc04622	RIG-I-like receptor signaling pathway	0.971717	1	9	MAPK8
ssc03440	Homologous recombination	0.971717	1	9	ENSSSCG00000027506
ssc00052	Galactose metabolism	0.971717	1	9	GANC
ssc00970	Aminoacyl-tRNA biosynthesis	0.985482	3	21	ENSSSCG00000008068;ENSSSCG00000025315;NARS2
ssc04721	Synaptic vesicle cycle	0.987258	1	11	ENSSSCG00000017712
ssc05323	Rheumatoid arthritis	0.987258	1	11	ENSSSCG00000001695
ssc00190	Oxidative phosphorylation	0.989164	2	17	NDUFS2;NDUFV2
ssc03420	Nucleotide excision repair	0.99616	1	14	ENSSSCG00000027506
ssc03460	Fanconi anemia pathway	0.998848	1	17	ENSSSCG00000025703

## Sheet: KEGG analysis in oocyte
KEGG analysis of host genes producing DECs in oocytes
Pathway_ID	Pathway_Name	Corrected P-value	Diff Genes #	Background Genes #	Involved Genes
ssc04020	Calcium signaling pathway	0.0024058	5	23	ENSSSCG00000002688;ENSSSCG00000027898;ITPR3;RYR1;RYR2
ssc05222	Small cell lung cancer	0.00308656	4	15	AKT3;ENSSSCG00000003909;ITGA6;LAMB1
ssc04972	Pancreatic secretion	0.00308656	4	15	ATP1A3;ENSSSCG00000027898;ITPR3;RYR2
ssc04024	cAMP signaling pathway	0.00420658	6	37	AKT3;ATP1A3;ENSSSCG00000003909;ENSSSCG00000027898;GABBR1;RYR2
ssc05145	Toxoplasmosis	0.00627838	4	18	AKT3;ENSSSCG00000003909;ITGA6;LAMB1
ssc04380	Osteoclast differentiation	0.00769947	4	19	AKT3;CALCR;ENSSSCG00000002688;ENSSSCG00000003909
ssc04261	Adrenergic signaling in cardiomyocytes	0.00808175	5	30	AKT3;ATP1A3;ENSSSCG00000003909;ENSSSCG00000027898;RYR2
ssc04970	Salivary secretion	0.010129	3	11	ATP1A3;ENSSSCG00000027898;ITPR3
ssc04973	Carbohydrate digestion and absorption	0.010129	3	11	AKT3;ATP1A3;ENSSSCG00000003909
ssc04915	Estrogen signaling pathway	0.011145	4	21	AKT3;ENSSSCG00000003909;GABBR1;ITPR3
ssc04666	Fc gamma R-mediated phagocytosis	0.011145	4	21	AKT3;ENSSSCG00000002688;ENSSSCG00000003909;WASF1
ssc04022	cGMP - PKG signaling pathway	0.01219	5	33	AKT3;ATP1A3;ENSSSCG00000003909;ENSSSCG00000027898;ITPR3
ssc04664	Fc epsilon RI signaling pathway	0.013094	3	12	AKT3;ENSSSCG00000002688;ENSSSCG00000003909
ssc04662	B cell receptor signaling pathway	0.0165047	3	13	AKT3;ENSSSCG00000002688;ENSSSCG00000003909
ssc00563	GlycosylphosphatidylinositolGPI-anchor biosynthesis)	0.0172338	2	5	ENSSSCG00000016073;GPLD1
ssc05231	Choline metabolism in cancer	0.0179632	4	24	AKT3;ENSSSCG00000003909;PCYT1B;WASF1
ssc04370	VEGF signaling pathway	0.0203683	3	14	AKT3;ENSSSCG00000002688;ENSSSCG00000003909
ssc05214	Glioma	0.0203683	3	14	AKT3;ENSSSCG00000002688;ENSSSCG00000003909
ssc04611	Platelet activation	0.0207076	4	25	AKT3;ENSSSCG00000002688;ENSSSCG00000003909;ITPR3
ssc04976	Bile secretion	0.0246887	3	15	ABCB4;ABCC2;ATP1A3
ssc05223	Non-small cell lung cancer	0.0246887	3	15	AKT3;ENSSSCG00000002688;ENSSSCG00000003909
ssc04911	Insulin secretion	0.0294667	3	16	ATP1A3;ITPR3;RYR2
ssc05162	Measles	0.0294667	3	16	AKT3;CSNK2A2;ENSSSCG00000003909
ssc04921	Oxytocin signaling pathway	0.0304382	4	28	ENSSSCG00000003909;ITPR3;RYR1;RYR2
ssc05169	Epstein-Barr virus infection	0.0324857	5	42	AKT3;CSNK2A2;ENSSSCG00000002688;ENSSSCG00000003909;GTF2B
ssc04725	Cholinergic synapse	0.0347002	3	17	AKT3;ENSSSCG00000003909;ITPR3
ssc05210	Colorectal cancer	0.0347002	3	17	AKT3;ENSSSCG00000003909;MSH3
ssc04713	Circadian entrainment	0.0347002	3	17	ITPR3;RYR1;RYR2
ssc04960	Aldosterone-regulated sodium reabsorption	0.0443609	2	8	ATP1A3;ENSSSCG00000003909
ssc04750	Inflammatory mediator regulation of TRP channels	0.046513	3	19	ENSSSCG00000002688;ENSSSCG00000003909;ITPR3
ssc04260	Cardiac muscle contraction	0.0554679	2	9	ATP1A3;RYR2
ssc04923	Regulation of lipolysis in adipocyte	0.0554679	2	9	AKT3;ENSSSCG00000003909
ssc04510	Focal adhesion	0.067826	4	36	AKT3;ENSSSCG00000003909;ITGA6;LAMB1
ssc05200	Pathways in cancer	0.0789544	6	70	AKT3;ENSSSCG00000002688;ENSSSCG00000003909;ITGA6;LAMB1;MSH3
ssc04919	Thyroid hormone signaling pathway	0.0797637	4	38	AKT3;ATP1A3;ENSSSCG00000002688;ENSSSCG00000003909
ssc03022	Basal transcription factors	0.0801701	2	11	GTF2B;GTF2F1
ssc05218	Melanoma	0.0801701	2	11	AKT3;ENSSSCG00000003909
ssc05410	Hypertrophic cardiomyopathy(HCM)	0.0801701	2	11	ITGA6;RYR2
ssc04721	Synaptic vesicle cycle	0.0801701	2	11	ATP6V0A4;UNC13C
ssc04064	NF-kappa B signaling pathway	0.0801701	2	11	CSNK2A2;ENSSSCG00000002688
ssc04066	HIF-1 signaling pathway	0.0834545	3	24	AKT3;ENSSSCG00000002688;ENSSSCG00000003909
ssc04922	Glucagon signaling pathway	0.0920109	3	25	AKT3;ITPR3;LDHC
ssc04070	Phosphatidylinositol signaling system	0.0920109	3	25	ENSSSCG00000002688;ENSSSCG00000003909;ITPR3
ssc04012	ErbB signaling pathway	0.0920109	3	25	AKT3;ENSSSCG00000002688;ENSSSCG00000003909
ssc04722	Neurotrophin signaling pathway	0.0920109	3	25	AKT3;ENSSSCG00000002688;ENSSSCG00000003909
ssc04650	Natural killer cell mediated cytotoxicity	0.0935853	2	12	ENSSSCG00000002688;ENSSSCG00000003909
ssc04080	Neuroactive ligand-receptor interaction	0.0935853	2	12	CALCR;GABBR1
ssc04512	ECM-receptor interaction	0.0935853	2	12	ITGA6;LAMB1
ssc04620	Toll-like receptor signaling pathway	0.0935853	2	12	AKT3;ENSSSCG00000003909
ssc02010	ABC transporters	0.0935853	2	12	ABCB4;ABCC2
ssc04210	Apoptosis	0.1076	2	13	AKT3;ENSSSCG00000003909
ssc05414	Dilated cardiomyopathy(DCM)	0.1076	2	13	ITGA6;RYR2
ssc04550	Signaling pathways regulating pluripotency of stem cells	0.110169	3	27	AKT3;ENSSSCG00000003909;ZFHX3
ssc04971	Gastric acid secretion	0.122139	2	14	ATP1A3;ITPR3
ssc05221	Acute myeloid leukemia	0.122139	2	14	AKT3;ENSSSCG00000003909
ssc00770	Pantothenate and CoA biosynthesis	0.125735	1	3	DPYS
ssc04742	Taste transduction	0.125735	1	3	ITPR3
ssc04730	Long-term depression	0.137131	2	15	ITPR3;RYR1
ssc04728	Dopaminergic synapse	0.139762	3	30	AKT3;ENSSSCG00000008909;ITPR3
ssc05412	Arrhythmogenic right ventricular cardiomyopathy(ARVC)	0.152511	2	16	ITGA6;RYR2
ssc05146	Amoebiasis	0.152511	2	16	ENSSSCG00000003909;LAMB1
ssc05213	Endometrial cancer	0.152511	2	16	AKT3;ENSSSCG00000003909
ssc05230	Central carbon metabolism in cancer	0.152511	2	16	AKT3;ENSSSCG00000003909
ssc04917	Prolactin signaling pathway	0.152511	2	16	AKT3;ENSSSCG00000003909
ssc04151	PI3K-Akt signaling pathway	0.161907	4	49	AKT3;ENSSSCG00000003909;ITGA6;LAMB1
ssc05205	Proteoglycans in cancer	0.161907	4	49	AKT3;ENSSSCG00000002688;ENSSSCG00000003909;ITPR3
ssc00350	Tyrosine metabolism	0.164102	1	4	DCT
ssc05100	Bacterial invasion of epithelial cells	0.16822	2	17	ENSSSCG00000003909;WASF1
ssc00240	Pyrimidine metabolism	0.16822	2	17	DPYS;ENSSSCG00000001493
ssc04530	Tight junction	0.182869	3	34	AKT3;CSNK2A2;MYH15
ssc04668	TNF signaling pathway	0.184199	2	18	AKT3;ENSSSCG00000003909
ssc04918	Thyroid hormone synthesis	0.184199	2	18	ATP1A3;ITPR3
ssc04014	Ras signaling pathway	0.194179	3	35	AKT3;ENSSSCG00000002688;ENSSSCG00000003909
ssc05211	Renal cell carcinoma	0.200397	2	19	AKT3;ENSSSCG00000003909
ssc05220	Chronic myeloid leukemia	0.200397	2	19	AKT3;ENSSSCG00000003909
ssc04966	Collecting duct acid secretion	0.200819	1	5	ATP6V0A4
ssc00100	Steroid biosynthesis	0.200819	1	5	SOAT1
ssc00983	Drug metabolism - other enzymes	0.200819	1	5	DPYS
ssc04660	T cell receptor signaling pathway	0.216766	2	20	AKT3;ENSSSCG00000003909
ssc04670	Leukocyte transendothelial migration	0.216766	2	20	ENSSSCG00000002688;ENSSSCG00000003909
ssc00564	Glycerophospholipid metabolism	0.216766	2	20	MBOAT1;PCYT1B
ssc05215	Prostate cancer	0.216766	2	20	AKT3;ENSSSCG00000003909
ssc03015	mRNA surveillance pathway	0.233261	2	21	HBS1L;PAPOLG
ssc04964	Proximal tubule bicarbonate reclamation	0.235956	1	6	ATP1A3
ssc04810	Regulation of actin cytoskeleton	0.241018	3	39	ENSSSCG00000003909;ITGA6;WASF1
ssc05142	Chagas disease(American trypanosomiasis)	0.24984	2	22	AKT3;ENSSSCG00000003909
ssc05212	Pancreatic cancer	0.24984	2	22	AKT3;ENSSSCG00000003909
ssc04150	mTOR signaling pathway	0.24984	2	22	AKT3;ENSSSCG00000003909
ssc04630	Jak-STAT signaling pathway	0.266466	2	23	AKT3;ENSSSCG00000003909
ssc00270	Cysteine and methionine metabolism	0.26958	1	7	LDHC
ssc04978	Mineral absorption	0.26958	1	7	ATP1A3
ssc05134	Legionellosis	0.26958	1	7	HBS1L
ssc00561	Glycerolipid metabolism	0.26958	1	7	MBOAT1
ssc03430	Mismatch repair	0.26958	1	7	MSH3
ssc05168	Herpes simplex infection	0.283104	2	24	CSNK2A2;ENSSSCG00000008909
ssc03008	Ribosome biogenesis in eukaryotes	0.283104	2	24	CSNK2A2;SPATA5
ssc05152	Tuberculosis	0.283104	2	24	AKT3;ATP6V0A4
ssc04932	Non-alcoholic fatty liver disease(NAFLD)	0.283104	2	24	AKT3;ENSSSCG00000003909
ssc05160	Hepatitis C	0.283104	2	24	AKT3;ENSSSCG00000003909
ssc04520	Adherens junction	0.299721	2	25	CSNK2A2;WASF1
ssc05164	Influenza A	0.299721	2	25	AKT3;ENSSSCG00000003909
ssc04071	Sphingolipid signaling pathway	0.299721	2	25	AKT3;ENSSSCG00000003909
ssc00410	beta-Alanine metabolism	0.301754	1	8	DPYS
ssc00900	Terpenoid backbone biosynthesis	0.301754	1	8	ENSSSCG00000011061
ssc00620	Pyruvate metabolism	0.332539	1	9	LDHC
ssc04710	Circadian rhythm	0.332539	1	9	ENSSSCG00000008909
ssc04320	Dorso-ventral axis formation	0.332539	1	9	PIWIL2
ssc04062	Chemokine signaling pathway	0.332777	2	27	AKT3;ENSSSCG00000003909
ssc04914	Progesterone-mediated oocyte maturation	0.349164	2	28	AKT3;ENSSSCG00000003909
ssc04640	Hematopoietic cell lineage	0.361995	1	10	ITGA6
ssc04930	Type II diabetes mellitus	0.361995	1	10	ENSSSCG00000003909
ssc04514	Cell adhesion molecules(CAMs)	0.361995	1	10	ITGA6
ssc04961	Endocrine and other factor-regulated calcium reabsorption	0.361995	1	10	ATP1A3
ssc03030	DNA replication	0.361995	1	10	ENSSSCG00000001493
ssc05161	Hepatitis B	0.365428	2	29	AKT3;ENSSSCG00000003909
ssc04152	AMPK signaling pathway	0.381547	2	30	AKT3;ENSSSCG00000003909
ssc04974	Protein digestion and absorption	0.390178	1	11	ATP1A3
ssc05323	Rheumatoid arthritis	0.390178	1	11	ATP6V0A4
ssc04068	FoxO signaling pathway	0.41328	2	32	AKT3;ENSSSCG00000003909
ssc00010	Glycolysis / Gluconeogenesis	0.417141	1	12	LDHC
ssc00640	Propanoate metabolism	0.417141	1	12	LDHC
ssc04310	Wnt signaling pathway	0.428862	2	33	CSNK2A2;ENSSSCG00000030998
ssc04910	Insulin signaling pathway	0.428862	2	33	AKT3;ENSSSCG00000003909
ssc04540	Gap junction	0.442936	1	13	ITPR3
ssc04920	Adipocytokine signaling pathway	0.442936	1	13	AKT3
ssc04720	Long-term potentiation	0.467613	1	14	ITPR3
ssc05132	Salmonella infection	0.467613	1	14	WASF1
ssc05032	Morphine addiction	0.467613	1	14	GABBR1
ssc04270	Vascular smooth muscle contraction	0.513799	1	16	ITPR3
ssc04015	Rap1 signaling pathway	0.517626	2	39	AKT3;ENSSSCG00000003909
ssc05203	Viral carcinogenesis	0.531552	2	40	ENSSSCG00000003909;GTF2B
ssc03460	Fanconi anemia pathway	0.535398	1	17	FANCD2
ssc00190	Oxidative phosphorylation	0.535398	1	17	ATP6V0A4
ssc04723	Retrograde endocannabinoid signaling	0.535398	1	17	ITPR3
ssc04916	Melanogenesis	0.556057	1	18	DCT
ssc04727	GABAergic synapse	0.556057	1	18	GABBR1
ssc04726	Serotonergic synapse	0.556057	1	18	ITPR3
ssc04912	GnRH signaling pathway	0.556057	1	18	ITPR3
ssc05166	HTLV-I infection	0.571726	2	43	AKT3;ENSSSCG00000003909
ssc04724	Glutamatergic synapse	0.575815	1	19	ITPR3
ssc00562	Inositol phosphate metabolism	0.575815	1	19	ENSSSCG00000002688
ssc03018	RNA degradation	0.612785	1	21	CNOT3
ssc05010	Alzheimer's disease	0.6624	1	24	ITPR3
ssc04145	Phagosome	0.6624	1	24	ATP6V0A4
ssc03040	Spliceosome	0.677511	1	25	ENSSSCG00000030119
ssc05016	Huntington's disease	0.73161	1	29	ENSSSCG00000015379
ssc04114	Oocyte meiosis	0.75522	1	31	ITPR3
ssc00230	Purine metabolism	0.75522	1	31	ENSSSCG00000001493
ssc04142	Lysosome	0.796503	1	35	ATP6V0A4
ssc05206	MicroRNAs in cancer	0.796503	1	35	ENSSSCG00000002688
ssc04110	Cell cycle	0.796503	1	35	WEE2
ssc04120	Ubiquitin mediated proteolysis	0.830947	1	39	BIRC6
ssc03013	RNA transport	0.859664	1	43	CEP192
ssc04010	MAPK signaling pathway	0.872173	1	45	AKT3
ssc04141	Protein processing in endoplasmic reticulum	0.888917	1	48	ENSSSCG00000009502
