# Supplementary material for: Circular RNA profiling in the oocyte and cumulus cells reveals that circARMC4 is essential for porcine oocyte maturation
Source: Aging (Albany NY). 2019 Sep 28;11(18):8015–34. doi: 10.18632/aging.102315 (PMC6781969; doi:10.18632/aging.102315)
Supplement: Supplementary Table 8 [file aging-11-102315-s009.xlsx]

## Sheet: total circRNA-miRNA interaction
Supplementary Table 8. circRNA-miRNA interaction analysis.
circRNA	chr	start	end	strand	exon Count	circType	circRNA category	isoformName	geneName	hosting gene type	flankIntron	gene Discription	GO	KEGG	miRNA	Site Type	TargetScan_score	TargetScan_score_percentile	miranda_score	miranda_Energy
ciRNA1	chr7	80963958	80964232	-	1	ciRNA	-	ENSSSCT00000002260	PPP1R3E	mRNA	chr7:80963930-80964232	protein phosphatase 1 regulatory subunit 3E [Source:HGNC Symbol;Acc:HGNC:14943]	NA	NA	ssc-miR-32	m8	-0.1755	56	143	-13.76
ciRNA1	chr7	80963958	80964232	-	1	ciRNA	-	ENSSSCT00000002260	PPP1R3E	mRNA	chr7:80963930-80964232	protein phosphatase 1 regulatory subunit 3E [Source:HGNC Symbol;Acc:HGNC:14943]	NA	NA	ssc-miR-363	m8	-0.2065	71	144	-17.88
ciRNA1	chr7	80963958	80964232	-	1	ciRNA	-	ENSSSCT00000002260	PPP1R3E	mRNA	chr7:80963930-80964232	protein phosphatase 1 regulatory subunit 3E [Source:HGNC Symbol;Acc:HGNC:14943]	NA	NA	ssc-miR-532-3p	m8	-0.222	81	163	-29.7
ciRNA1	chr7	80963958	80964232	-	1	ciRNA	-	ENSSSCT00000002260	PPP1R3E	mRNA	chr7:80963930-80964232	protein phosphatase 1 regulatory subunit 3E [Source:HGNC Symbol;Acc:HGNC:14943]	NA	NA	ssc-miR-92a	m8	-0.222	79	156	-20.31
ciRNA1	chr7	80963958	80964232	-	1	ciRNA	-	ENSSSCT00000002260	PPP1R3E	mRNA	chr7:80963930-80964232	protein phosphatase 1 regulatory subunit 3E [Source:HGNC Symbol;Acc:HGNC:14943]	NA	NA	ssc-miR-92b-3p	m8	-0.222	79	160	-21.11
ciRNA1	chr7	80963958	80964232	-	1	ciRNA	-	ENSSSCT00000002260	PPP1R3E	mRNA	chr7:80963930-80964232	protein phosphatase 1 regulatory subunit 3E [Source:HGNC Symbol;Acc:HGNC:14943]	NA	NA	ssc-miR-9805-3p	m8	-0.174	74	143	-20.5
ciRNA10	chr3	42877346	42877608	-	1	ciRNA	-	ENSSSCT00000022926	ENSSSCG00000029921	mRNA	chr3:42877343-42877608	NA	GO:0006468(protein phosphorylation);GO:0005524(ATP binding);GO:0004672(protein kinase activity)	NA	ssc-miR-103	m8	-0.246	85	144	-17.78
ciRNA10	chr3	42877346	42877608	-	1	ciRNA	-	ENSSSCT00000022926	ENSSSCG00000029921	mRNA	chr3:42877343-42877608	NA	GO:0006468(protein phosphorylation);GO:0005524(ATP binding);GO:0004672(protein kinase activity)	NA	ssc-miR-107	m8	-0.246	86	144	-16.05
ciRNA10	chr3	42877346	42877608	-	1	ciRNA	-	ENSSSCT00000022926	ENSSSCG00000029921	mRNA	chr3:42877343-42877608	NA	GO:0006468(protein phosphorylation);GO:0005524(ATP binding);GO:0004672(protein kinase activity)	NA	ssc-miR-194a	m8	-0.2645	85	146	-10.19
ciRNA10	chr3	42877346	42877608	-	1	ciRNA	-	ENSSSCT00000022926	ENSSSCG00000029921	mRNA	chr3:42877343-42877608	NA	GO:0006468(protein phosphorylation);GO:0005524(ATP binding);GO:0004672(protein kinase activity)	NA	ssc-miR-194b-5p	m8	-0.2645	85	144	-10.74
ciRNA10	chr3	42877346	42877608	-	1	ciRNA	-	ENSSSCT00000022926	ENSSSCG00000029921	mRNA	chr3:42877343-42877608	NA	GO:0006468(protein phosphorylation);GO:0005524(ATP binding);GO:0004672(protein kinase activity)	NA	ssc-miR-324	m8	-0.2105	82	145	-18.61
ciRNA10	chr3	42877346	42877608	-	1	ciRNA	-	ENSSSCT00000022926	ENSSSCG00000029921	mRNA	chr3:42877343-42877608	NA	GO:0006468(protein phosphorylation);GO:0005524(ATP binding);GO:0004672(protein kinase activity)	NA	ssc-miR-6782-3p	m8	-0.18	71	152	-22.06
ciRNA10	chr3	42877346	42877608	-	1	ciRNA	-	ENSSSCT00000022926	ENSSSCG00000029921	mRNA	chr3:42877343-42877608	NA	GO:0006468(protein phosphorylation);GO:0005524(ATP binding);GO:0004672(protein kinase activity)	NA	ssc-miR-92b-5p	m8	-0.127	61	156	-31.13
ciRNA100	chr12	1163312	1163661	+	1	ciRNA	-	ENSSSCT00000025260	ACTG1	mRNA	chr12:1163311-1163686	actin gamma 1 [Source:HGNC Symbol;Acc:HGNC:144]	GO:0097433(dense body);GO:0072562(blood microparticle);GO:0070062(extracellular exosome);GO:0043209(myelin sheath);GO:0031941(filamentous actin);GO:0031012(extracellular matrix);GO:0030016(myofibril);GO:0016020(membrane);GO:0015629(actin cytoskeleton);GO:0005925(focal adhesion);GO:0005886(plasma membrane);GO:0005856(cytoskeleton);GO:0005634(nucleus);GO:0005615(extracellular space);GO:0070527(plat…	04015(Rap1 signaling pathway);04390(Hippo signaling pathway);04145(Phagosome);04810(Regulation of actin cytoskeleton);04510(Focal adhesion);04520(Adherens junction);04530(Tight junction);04611(Platelet activation);04670(Leukocyte transendothelial migration);04921(Oxytocin signaling pathway);04919(Thyroid hormone signaling pathway);05205(Proteoglycans in cancer);05410(Hypertrophic cardiomyopathy (…	ssc-miR-9824-5p	8mer	-0.1922	76	153	-24.23
ciRNA101	chr12	1446545	1446902	+	1	ciRNA	-	ENSSSCT00000018663	CEP131	mRNA	chr12:1446544-1446925	centrosomal protein 131 [Source:HGNC Symbol;Acc:HGNC:29511]	GO:0045171(intercellular bridge);GO:0043231(intracellular membrane-bounded organelle);GO:0035869(ciliary transition zone);GO:0034451(centriolar satellite);GO:0015630(microtubule cytoskeleton);GO:0005815(microtubule organizing center);GO:0005813(centrosome);GO:0090316(positive regulation of intracellular protein transport);GO:0071539(protein localization to centrosome);GO:0060271(cilium assembly);…	NA	ssc-miR-1271	m8	-0.1375	57	148	-24.21
ciRNA101	chr12	1446545	1446902	+	1	ciRNA	-	ENSSSCT00000018663	CEP131	mRNA	chr12:1446544-1446925	centrosomal protein 131 [Source:HGNC Symbol;Acc:HGNC:29511]	GO:0045171(intercellular bridge);GO:0043231(intracellular membrane-bounded organelle);GO:0035869(ciliary transition zone);GO:0034451(centriolar satellite);GO:0015630(microtubule cytoskeleton);GO:0005815(microtubule organizing center);GO:0005813(centrosome);GO:0090316(positive regulation of intracellular protein transport);GO:0071539(protein localization to centrosome);GO:0060271(cilium assembly);…	NA	ssc-miR-9835-3p	m8	-0.14	55	162	-27.97
ciRNA102	chr12	2390290	2390447	-	1	ciRNA	-	ENSSSCT00000018680	ENSSSCG00000017156	mRNA	chr12:2390265-2390447	NA	GO:0008152(metabolic process);GO:0005975(carbohydrate metabolic process);GO:0030246(carbohydrate binding);GO:0016798(hydrolase activity, acting on glycosyl bonds);GO:0016787(hydrolase activity);GO:0004553(hydrolase activity, hydrolyzing O-glycosyl compounds);GO:0003824(catalytic activity)	00052(Galactose metabolism);00500(Starch and sucrose metabolism);04142(Lysosome)	ssc-miR-2320-5p	8mer	-0.33625	93	149	-20.45
ciRNA102	chr12	2390290	2390447	-	1	ciRNA	-	ENSSSCT00000018680	ENSSSCG00000017156	mRNA	chr12:2390265-2390447	NA	GO:0008152(metabolic process);GO:0005975(carbohydrate metabolic process);GO:0030246(carbohydrate binding);GO:0016798(hydrolase activity, acting on glycosyl bonds);GO:0016787(hydrolase activity);GO:0004553(hydrolase activity, hydrolyzing O-glycosyl compounds);GO:0003824(catalytic activity)	00052(Galactose metabolism);00500(Starch and sucrose metabolism);04142(Lysosome)	ssc-miR-361-3p	8mer	-0.2682	87	147	-30.07
ciRNA103	chr12	5008338	5008533	+	1	ciRNA	-	ENSSSCT00000032146	UBE2O	mRNA	chr12:5008337-5008556	ubiquitin conjugating enzyme E2 O [Source:HGNC Symbol;Acc:HGNC:29554]	GO:0016604(nuclear body);GO:0005829(cytosol);GO:0005737(cytoplasm);GO:0005634(nucleus);GO:0070534(protein K63-linked ubiquitination);GO:0042147(retrograde transport, endosome to Golgi);GO:0030513(positive regulation of BMP signaling pathway);GO:0006513(protein monoubiquitination);GO:0061631(ubiquitin conjugating enzyme activity);GO:0061630(ubiquitin protein ligase activity);GO:0031625(ubiquitin p…	04120(Ubiquitin mediated proteolysis)	ssc-miR-193a-3p	m8	-0.191	72	160	-20.6
ciRNA103	chr12	5008338	5008533	+	1	ciRNA	-	ENSSSCT00000032146	UBE2O	mRNA	chr12:5008337-5008556	ubiquitin conjugating enzyme E2 O [Source:HGNC Symbol;Acc:HGNC:29554]	GO:0016604(nuclear body);GO:0005829(cytosol);GO:0005737(cytoplasm);GO:0005634(nucleus);GO:0070534(protein K63-linked ubiquitination);GO:0042147(retrograde transport, endosome to Golgi);GO:0030513(positive regulation of BMP signaling pathway);GO:0006513(protein monoubiquitination);GO:0061631(ubiquitin conjugating enzyme activity);GO:0061630(ubiquitin protein ligase activity);GO:0031625(ubiquitin p…	04120(Ubiquitin mediated proteolysis)	ssc-miR-24-3p	8mer	-0.2053	79	149	-23.14
ciRNA103	chr12	5008338	5008533	+	1	ciRNA	-	ENSSSCT00000032146	UBE2O	mRNA	chr12:5008337-5008556	ubiquitin conjugating enzyme E2 O [Source:HGNC Symbol;Acc:HGNC:29554]	GO:0016604(nuclear body);GO:0005829(cytosol);GO:0005737(cytoplasm);GO:0005634(nucleus);GO:0070534(protein K63-linked ubiquitination);GO:0042147(retrograde transport, endosome to Golgi);GO:0030513(positive regulation of BMP signaling pathway);GO:0006513(protein monoubiquitination);GO:0061631(ubiquitin conjugating enzyme activity);GO:0061630(ubiquitin protein ligase activity);GO:0031625(ubiquitin p…	04120(Ubiquitin mediated proteolysis)	ssc-miR-9824-5p	8mer	-0.1293	58	151	-33.67
ciRNA104	chr12	49604113	49604271	-	1	ciRNA	-	ENSSSCT00000030204	ENSSSCG00000030707	mRNA	chr12:49604091-49604271	NA	GO:0046856(phosphatidylinositol dephosphorylation);GO:0016787(hydrolase activity)	00562(Inositol phosphate metabolism);04070(Phosphatidylinositol signaling system)	ssc-miR-326	m8	-0.1795	73	161	-25.22
ciRNA104	chr12	49604113	49604271	-	1	ciRNA	-	ENSSSCT00000030204	ENSSSCG00000030707	mRNA	chr12:49604091-49604271	NA	GO:0046856(phosphatidylinositol dephosphorylation);GO:0016787(hydrolase activity)	00562(Inositol phosphate metabolism);04070(Phosphatidylinositol signaling system)	ssc-miR-484	8mer	-0.22235	88	143	-23.64
ciRNA105	chr12	49604114	49604271	-	1	ciRNA	-	ENSSSCT00000030204	ENSSSCG00000030707	mRNA	chr12:49604091-49604271	NA	GO:0046856(phosphatidylinositol dephosphorylation);GO:0016787(hydrolase activity)	00562(Inositol phosphate metabolism);04070(Phosphatidylinositol signaling system)	ssc-miR-326	m8	-0.1805	73	161	-25.22
ciRNA105	chr12	49604114	49604271	-	1	ciRNA	-	ENSSSCT00000030204	ENSSSCG00000030707	mRNA	chr12:49604091-49604271	NA	GO:0046856(phosphatidylinositol dephosphorylation);GO:0016787(hydrolase activity)	00562(Inositol phosphate metabolism);04070(Phosphatidylinositol signaling system)	ssc-miR-484	8mer	-0.22235	88	143	-23.64
ciRNA106	chr12	56027502	56028260	-	1	ciRNA	-	ENSSSCT00000024076	RPL26	mRNA	chr12:56026758-56028260	ribosomal protein L26 [Source:HGNC Symbol;Acc:HGNC:10327]	GO:0070062(extracellular exosome);GO:0022625(cytosolic large ribosomal subunit);GO:0016020(membrane);GO:0015934(large ribosomal subunit);GO:0005840(ribosome);GO:0005622(intracellular);GO:0042273(ribosomal large subunit biogenesis);GO:0006412(translation);GO:0006364(rRNA processing);GO:0003735(structural constituent of ribosome);GO:0003723(RNA binding)	03010(Ribosome)	ssc-miR-105-1	8mer	-0.2883	86	141	-16.02
ciRNA106	chr12	56027502	56028260	-	1	ciRNA	-	ENSSSCT00000024076	RPL26	mRNA	chr12:56026758-56028260	ribosomal protein L26 [Source:HGNC Symbol;Acc:HGNC:10327]	GO:0070062(extracellular exosome);GO:0022625(cytosolic large ribosomal subunit);GO:0016020(membrane);GO:0015934(large ribosomal subunit);GO:0005840(ribosome);GO:0005622(intracellular);GO:0042273(ribosomal large subunit biogenesis);GO:0006412(translation);GO:0006364(rRNA processing);GO:0003735(structural constituent of ribosome);GO:0003723(RNA binding)	03010(Ribosome)	ssc-miR-105-2	8mer	-0.2883	86	141	-16.39
ciRNA106	chr12	56027502	56028260	-	1	ciRNA	-	ENSSSCT00000024076	RPL26	mRNA	chr12:56026758-56028260	ribosomal protein L26 [Source:HGNC Symbol;Acc:HGNC:10327]	GO:0070062(extracellular exosome);GO:0022625(cytosolic large ribosomal subunit);GO:0016020(membrane);GO:0015934(large ribosomal subunit);GO:0005840(ribosome);GO:0005622(intracellular);GO:0042273(ribosomal large subunit biogenesis);GO:0006412(translation);GO:0006364(rRNA processing);GO:0003735(structural constituent of ribosome);GO:0003723(RNA binding)	03010(Ribosome)	ssc-miR-140-3p	m8	-0.1225	51	160	-20.46
ciRNA106	chr12	56027502	56028260	-	1	ciRNA	-	ENSSSCT00000024076	RPL26	mRNA	chr12:56026758-56028260	ribosomal protein L26 [Source:HGNC Symbol;Acc:HGNC:10327]	GO:0070062(extracellular exosome);GO:0022625(cytosolic large ribosomal subunit);GO:0016020(membrane);GO:0015934(large ribosomal subunit);GO:0005840(ribosome);GO:0005622(intracellular);GO:0042273(ribosomal large subunit biogenesis);GO:0006412(translation);GO:0006364(rRNA processing);GO:0003735(structural constituent of ribosome);GO:0003723(RNA binding)	03010(Ribosome)	ssc-miR-149	m8	-0.284	90	167	-27.73
ciRNA106	chr12	56027502	56028260	-	1	ciRNA	-	ENSSSCT00000024076	RPL26	mRNA	chr12:56026758-56028260	ribosomal protein L26 [Source:HGNC Symbol;Acc:HGNC:10327]	GO:0070062(extracellular exosome);GO:0022625(cytosolic large ribosomal subunit);GO:0016020(membrane);GO:0015934(large ribosomal subunit);GO:0005840(ribosome);GO:0005622(intracellular);GO:0042273(ribosomal large subunit biogenesis);GO:0006412(translation);GO:0006364(rRNA processing);GO:0003735(structural constituent of ribosome);GO:0003723(RNA binding)	03010(Ribosome)	ssc-miR-15a	m8	-0.188	66	154	-17.65
ciRNA106	chr12	56027502	56028260	-	1	ciRNA	-	ENSSSCT00000024076	RPL26	mRNA	chr12:56026758-56028260	ribosomal protein L26 [Source:HGNC Symbol;Acc:HGNC:10327]	GO:0070062(extracellular exosome);GO:0022625(cytosolic large ribosomal subunit);GO:0016020(membrane);GO:0015934(large ribosomal subunit);GO:0005840(ribosome);GO:0005622(intracellular);GO:0042273(ribosomal large subunit biogenesis);GO:0006412(translation);GO:0006364(rRNA processing);GO:0003735(structural constituent of ribosome);GO:0003723(RNA binding)	03010(Ribosome)	ssc-miR-15b	m8	-0.2035	71	159	-17.54
ciRNA106	chr12	56027502	56028260	-	1	ciRNA	-	ENSSSCT00000024076	RPL26	mRNA	chr12:56026758-56028260	ribosomal protein L26 [Source:HGNC Symbol;Acc:HGNC:10327]	GO:0070062(extracellular exosome);GO:0022625(cytosolic large ribosomal subunit);GO:0016020(membrane);GO:0015934(large ribosomal subunit);GO:0005840(ribosome);GO:0005622(intracellular);GO:0042273(ribosomal large subunit biogenesis);GO:0006412(translation);GO:0006364(rRNA processing);GO:0003735(structural constituent of ribosome);GO:0003723(RNA binding)	03010(Ribosome)	ssc-miR-16	m8	-0.2345	80	149	-16.25
ciRNA106	chr12	56027502	56028260	-	1	ciRNA	-	ENSSSCT00000024076	RPL26	mRNA	chr12:56026758-56028260	ribosomal protein L26 [Source:HGNC Symbol;Acc:HGNC:10327]	GO:0070062(extracellular exosome);GO:0022625(cytosolic large ribosomal subunit);GO:0016020(membrane);GO:0015934(large ribosomal subunit);GO:0005840(ribosome);GO:0005622(intracellular);GO:0042273(ribosomal large subunit biogenesis);GO:0006412(translation);GO:0006364(rRNA processing);GO:0003735(structural constituent of ribosome);GO:0003723(RNA binding)	03010(Ribosome)	ssc-miR-193a-5p	8mer	-0.44135	97	150	-23.81
ciRNA106	chr12	56027502	56028260	-	1	ciRNA	-	ENSSSCT00000024076	RPL26	mRNA	chr12:56026758-56028260	ribosomal protein L26 [Source:HGNC Symbol;Acc:HGNC:10327]	GO:0070062(extracellular exosome);GO:0022625(cytosolic large ribosomal subunit);GO:0016020(membrane);GO:0015934(large ribosomal subunit);GO:0005840(ribosome);GO:0005622(intracellular);GO:0042273(ribosomal large subunit biogenesis);GO:0006412(translation);GO:0006364(rRNA processing);GO:0003735(structural constituent of ribosome);GO:0003723(RNA binding)	03010(Ribosome)	ssc-miR-195	m8	-0.2345	80	150	-15.45
ciRNA106	chr12	56027502	56028260	-	1	ciRNA	-	ENSSSCT00000024076	RPL26	mRNA	chr12:56026758-56028260	ribosomal protein L26 [Source:HGNC Symbol;Acc:HGNC:10327]	GO:0070062(extracellular exosome);GO:0022625(cytosolic large ribosomal subunit);GO:0016020(membrane);GO:0015934(large ribosomal subunit);GO:0005840(ribosome);GO:0005622(intracellular);GO:0042273(ribosomal large subunit biogenesis);GO:0006412(translation);GO:0006364(rRNA processing);GO:0003735(structural constituent of ribosome);GO:0003723(RNA binding)	03010(Ribosome)	ssc-miR-199a-5p	m8	-0.155	59	156	-21.5
ciRNA106	chr12	56027502	56028260	-	1	ciRNA	-	ENSSSCT00000024076	RPL26	mRNA	chr12:56026758-56028260	ribosomal protein L26 [Source:HGNC Symbol;Acc:HGNC:10327]	GO:0070062(extracellular exosome);GO:0022625(cytosolic large ribosomal subunit);GO:0016020(membrane);GO:0015934(large ribosomal subunit);GO:0005840(ribosome);GO:0005622(intracellular);GO:0042273(ribosomal large subunit biogenesis);GO:0006412(translation);GO:0006364(rRNA processing);GO:0003735(structural constituent of ribosome);GO:0003723(RNA binding)	03010(Ribosome)	ssc-miR-217	m8	-0.222	77	160	-18.49
ciRNA106	chr12	56027502	56028260	-	1	ciRNA	-	ENSSSCT00000024076	RPL26	mRNA	chr12:56026758-56028260	ribosomal protein L26 [Source:HGNC Symbol;Acc:HGNC:10327]	GO:0070062(extracellular exosome);GO:0022625(cytosolic large ribosomal subunit);GO:0016020(membrane);GO:0015934(large ribosomal subunit);GO:0005840(ribosome);GO:0005622(intracellular);GO:0042273(ribosomal large subunit biogenesis);GO:0006412(translation);GO:0006364(rRNA processing);GO:0003735(structural constituent of ribosome);GO:0003723(RNA binding)	03010(Ribosome)	ssc-miR-221-5p	8mer	-0.36915	94	140	-16.21
ciRNA106	chr12	56027502	56028260	-	1	ciRNA	-	ENSSSCT00000024076	RPL26	mRNA	chr12:56026758-56028260	ribosomal protein L26 [Source:HGNC Symbol;Acc:HGNC:10327]	GO:0070062(extracellular exosome);GO:0022625(cytosolic large ribosomal subunit);GO:0016020(membrane);GO:0015934(large ribosomal subunit);GO:0005840(ribosome);GO:0005622(intracellular);GO:0042273(ribosomal large subunit biogenesis);GO:0006412(translation);GO:0006364(rRNA processing);GO:0003735(structural constituent of ribosome);GO:0003723(RNA binding)	03010(Ribosome)	ssc-miR-29a	8mer	-0.3823	89	152	-15.34
ciRNA106	chr12	56027502	56028260	-	1	ciRNA	-	ENSSSCT00000024076	RPL26	mRNA	chr12:56026758-56028260	ribosomal protein L26 [Source:HGNC Symbol;Acc:HGNC:10327]	GO:0070062(extracellular exosome);GO:0022625(cytosolic large ribosomal subunit);GO:0016020(membrane);GO:0015934(large ribosomal subunit);GO:0005840(ribosome);GO:0005622(intracellular);GO:0042273(ribosomal large subunit biogenesis);GO:0006412(translation);GO:0006364(rRNA processing);GO:0003735(structural constituent of ribosome);GO:0003723(RNA binding)	03010(Ribosome)	ssc-miR-29b	8mer	-0.30825	89	140	-14.18
ciRNA106	chr12	56027502	56028260	-	1	ciRNA	-	ENSSSCT00000024076	RPL26	mRNA	chr12:56026758-56028260	ribosomal protein L26 [Source:HGNC Symbol;Acc:HGNC:10327]	GO:0070062(extracellular exosome);GO:0022625(cytosolic large ribosomal subunit);GO:0016020(membrane);GO:0015934(large ribosomal subunit);GO:0005840(ribosome);GO:0005622(intracellular);GO:0042273(ribosomal large subunit biogenesis);GO:0006412(translation);GO:0006364(rRNA processing);GO:0003735(structural constituent of ribosome);GO:0003723(RNA binding)	03010(Ribosome)	ssc-miR-29c	8mer	-0.30825	90	143	-15.1
ciRNA106	chr12	56027502	56028260	-	1	ciRNA	-	ENSSSCT00000024076	RPL26	mRNA	chr12:56026758-56028260	ribosomal protein L26 [Source:HGNC Symbol;Acc:HGNC:10327]	GO:0070062(extracellular exosome);GO:0022625(cytosolic large ribosomal subunit);GO:0016020(membrane);GO:0015934(large ribosomal subunit);GO:0005840(ribosome);GO:0005622(intracellular);GO:0042273(ribosomal large subunit biogenesis);GO:0006412(translation);GO:0006364(rRNA processing);GO:0003735(structural constituent of ribosome);GO:0003723(RNA binding)	03010(Ribosome)	ssc-miR-370	m8	-0.2545	82	146	-20.51
ciRNA106	chr12	56027502	56028260	-	1	ciRNA	-	ENSSSCT00000024076	RPL26	mRNA	chr12:56026758-56028260	ribosomal protein L26 [Source:HGNC Symbol;Acc:HGNC:10327]	GO:0070062(extracellular exosome);GO:0022625(cytosolic large ribosomal subunit);GO:0016020(membrane);GO:0015934(large ribosomal subunit);GO:0005840(ribosome);GO:0005622(intracellular);GO:0042273(ribosomal large subunit biogenesis);GO:0006412(translation);GO:0006364(rRNA processing);GO:0003735(structural constituent of ribosome);GO:0003723(RNA binding)	03010(Ribosome)	ssc-miR-424-5p	m8	-0.219	75	154	-12.87
ciRNA106	chr12	56027502	56028260	-	1	ciRNA	-	ENSSSCT00000024076	RPL26	mRNA	chr12:56026758-56028260	ribosomal protein L26 [Source:HGNC Symbol;Acc:HGNC:10327]	GO:0070062(extracellular exosome);GO:0022625(cytosolic large ribosomal subunit);GO:0016020(membrane);GO:0015934(large ribosomal subunit);GO:0005840(ribosome);GO:0005622(intracellular);GO:0042273(ribosomal large subunit biogenesis);GO:0006412(translation);GO:0006364(rRNA processing);GO:0003735(structural constituent of ribosome);GO:0003723(RNA binding)	03010(Ribosome)	ssc-miR-450b-3p	8mer	-0.5112	99	147	-12.96
ciRNA106	chr12	56027502	56028260	-	1	ciRNA	-	ENSSSCT00000024076	RPL26	mRNA	chr12:56026758-56028260	ribosomal protein L26 [Source:HGNC Symbol;Acc:HGNC:10327]	GO:0070062(extracellular exosome);GO:0022625(cytosolic large ribosomal subunit);GO:0016020(membrane);GO:0015934(large ribosomal subunit);GO:0005840(ribosome);GO:0005622(intracellular);GO:0042273(ribosomal large subunit biogenesis);GO:0006412(translation);GO:0006364(rRNA processing);GO:0003735(structural constituent of ribosome);GO:0003723(RNA binding)	03010(Ribosome)	ssc-miR-450c-3p	8mer	-0.41225	96	153	-12.16
ciRNA106	chr12	56027502	56028260	-	1	ciRNA	-	ENSSSCT00000024076	RPL26	mRNA	chr12:56026758-56028260	ribosomal protein L26 [Source:HGNC Symbol;Acc:HGNC:10327]	GO:0070062(extracellular exosome);GO:0022625(cytosolic large ribosomal subunit);GO:0016020(membrane);GO:0015934(large ribosomal subunit);GO:0005840(ribosome);GO:0005622(intracellular);GO:0042273(ribosomal large subunit biogenesis);GO:0006412(translation);GO:0006364(rRNA processing);GO:0003735(structural constituent of ribosome);GO:0003723(RNA binding)	03010(Ribosome)	ssc-miR-490-5p	8mer	-0.2082	78	144	-12.72
ciRNA106	chr12	56027502	56028260	-	1	ciRNA	-	ENSSSCT00000024076	RPL26	mRNA	chr12:56026758-56028260	ribosomal protein L26 [Source:HGNC Symbol;Acc:HGNC:10327]	GO:0070062(extracellular exosome);GO:0022625(cytosolic large ribosomal subunit);GO:0016020(membrane);GO:0015934(large ribosomal subunit);GO:0005840(ribosome);GO:0005622(intracellular);GO:0042273(ribosomal large subunit biogenesis);GO:0006412(translation);GO:0006364(rRNA processing);GO:0003735(structural constituent of ribosome);GO:0003723(RNA binding)	03010(Ribosome)	ssc-miR-497	m8	-0.219	77	162	-21.45
ciRNA106	chr12	56027502	56028260	-	1	ciRNA	-	ENSSSCT00000024076	RPL26	mRNA	chr12:56026758-56028260	ribosomal protein L26 [Source:HGNC Symbol;Acc:HGNC:10327]	GO:0070062(extracellular exosome);GO:0022625(cytosolic large ribosomal subunit);GO:0016020(membrane);GO:0015934(large ribosomal subunit);GO:0005840(ribosome);GO:0005622(intracellular);GO:0042273(ribosomal large subunit biogenesis);GO:0006412(translation);GO:0006364(rRNA processing);GO:0003735(structural constituent of ribosome);GO:0003723(RNA binding)	03010(Ribosome)	ssc-miR-500	m8	-0.1465	58	150	-20.01
ciRNA106	chr12	56027502	56028260	-	1	ciRNA	-	ENSSSCT00000024076	RPL26	mRNA	chr12:56026758-56028260	ribosomal protein L26 [Source:HGNC Symbol;Acc:HGNC:10327]	GO:0070062(extracellular exosome);GO:0022625(cytosolic large ribosomal subunit);GO:0016020(membrane);GO:0015934(large ribosomal subunit);GO:0005840(ribosome);GO:0005622(intracellular);GO:0042273(ribosomal large subunit biogenesis);GO:0006412(translation);GO:0006364(rRNA processing);GO:0003735(structural constituent of ribosome);GO:0003723(RNA binding)	03010(Ribosome)	ssc-miR-9808-3p	m8	-0.161	56	151	-26.26
ciRNA106	chr12	56027502	56028260	-	1	ciRNA	-	ENSSSCT00000024076	RPL26	mRNA	chr12:56026758-56028260	ribosomal protein L26 [Source:HGNC Symbol;Acc:HGNC:10327]	GO:0070062(extracellular exosome);GO:0022625(cytosolic large ribosomal subunit);GO:0016020(membrane);GO:0015934(large ribosomal subunit);GO:0005840(ribosome);GO:0005622(intracellular);GO:0042273(ribosomal large subunit biogenesis);GO:0006412(translation);GO:0006364(rRNA processing);GO:0003735(structural constituent of ribosome);GO:0003723(RNA binding)	03010(Ribosome)	ssc-miR-9832-3p	m8	-0.214	73	145	-10.35
ciRNA106	chr12	56027502	56028260	-	1	ciRNA	-	ENSSSCT00000024076	RPL26	mRNA	chr12:56026758-56028260	ribosomal protein L26 [Source:HGNC Symbol;Acc:HGNC:10327]	GO:0070062(extracellular exosome);GO:0022625(cytosolic large ribosomal subunit);GO:0016020(membrane);GO:0015934(large ribosomal subunit);GO:0005840(ribosome);GO:0005622(intracellular);GO:0042273(ribosomal large subunit biogenesis);GO:0006412(translation);GO:0006364(rRNA processing);GO:0003735(structural constituent of ribosome);GO:0003723(RNA binding)	03010(Ribosome)	ssc-miR-9837-5p	m8	-0.1815	74	154	-14.4
ciRNA106	chr12	56027502	56028260	-	1	ciRNA	-	ENSSSCT00000024076	RPL26	mRNA	chr12:56026758-56028260	ribosomal protein L26 [Source:HGNC Symbol;Acc:HGNC:10327]	GO:0070062(extracellular exosome);GO:0022625(cytosolic large ribosomal subunit);GO:0016020(membrane);GO:0015934(large ribosomal subunit);GO:0005840(ribosome);GO:0005622(intracellular);GO:0042273(ribosomal large subunit biogenesis);GO:0006412(translation);GO:0006364(rRNA processing);GO:0003735(structural constituent of ribosome);GO:0003723(RNA binding)	03010(Ribosome)	ssc-miR-9839-5p	m8	-0.228	84	156	-19.78
ciRNA106	chr12	56027502	56028260	-	1	ciRNA	-	ENSSSCT00000024076	RPL26	mRNA	chr12:56026758-56028260	ribosomal protein L26 [Source:HGNC Symbol;Acc:HGNC:10327]	GO:0070062(extracellular exosome);GO:0022625(cytosolic large ribosomal subunit);GO:0016020(membrane);GO:0015934(large ribosomal subunit);GO:0005840(ribosome);GO:0005622(intracellular);GO:0042273(ribosomal large subunit biogenesis);GO:0006412(translation);GO:0006364(rRNA processing);GO:0003735(structural constituent of ribosome);GO:0003723(RNA binding)	03010(Ribosome)	ssc-miR-9861-5p	8mer	-0.3633	91	158	-14.81
ciRNA107	chr17	37442546	37442682	+	1	ciRNA	-	ENSSSCT00000029302	NOP56	mRNA	chr17:37442545-37442701	NA	GO:0032040(small-subunit processome);GO:0031428(box C/D snoRNP complex);GO:0000154(rRNA modification);GO:0030515(snoRNA binding)	03008(Ribosome biogenesis in eukaryotes)	ssc-miR-423-5p	m8	-0.229	86	155	-20.57
ciRNA108	chr16	55769468	55769779	+	1	ciRNA	-	ENSSSCT00000018501	DUSP1	mRNA	chr16:55769467-55769808	dual specificity phosphatase 1 [Source:HGNC Symbol;Acc:HGNC:3064]	GO:0005737(cytoplasm);GO:0005634(nucleus);GO:0043407(negative regulation of MAP kinase activity);GO:0042981(regulation of apoptotic process);GO:0035335(peptidyl-tyrosine dephosphorylation);GO:0016311(dephosphorylation);GO:0006470(protein dephosphorylation);GO:0001706(endoderm formation);GO:0000188(inactivation of MAPK activity);GO:0017017(MAP kinase tyrosine/serine/threonine phosphatase activity)…	04010(MAPK signaling pathway)	ssc-miR-103	m8	-0.165	67	156	-14.81
ciRNA108	chr16	55769468	55769779	+	1	ciRNA	-	ENSSSCT00000018501	DUSP1	mRNA	chr16:55769467-55769808	dual specificity phosphatase 1 [Source:HGNC Symbol;Acc:HGNC:3064]	GO:0005737(cytoplasm);GO:0005634(nucleus);GO:0043407(negative regulation of MAP kinase activity);GO:0042981(regulation of apoptotic process);GO:0035335(peptidyl-tyrosine dephosphorylation);GO:0016311(dephosphorylation);GO:0006470(protein dephosphorylation);GO:0001706(endoderm formation);GO:0000188(inactivation of MAPK activity);GO:0017017(MAP kinase tyrosine/serine/threonine phosphatase activity)…	04010(MAPK signaling pathway)	ssc-miR-107	m8	-0.165	66	156	-14.19
ciRNA108	chr16	55769468	55769779	+	1	ciRNA	-	ENSSSCT00000018501	DUSP1	mRNA	chr16:55769467-55769808	dual specificity phosphatase 1 [Source:HGNC Symbol;Acc:HGNC:3064]	GO:0005737(cytoplasm);GO:0005634(nucleus);GO:0043407(negative regulation of MAP kinase activity);GO:0042981(regulation of apoptotic process);GO:0035335(peptidyl-tyrosine dephosphorylation);GO:0016311(dephosphorylation);GO:0006470(protein dephosphorylation);GO:0001706(endoderm formation);GO:0000188(inactivation of MAPK activity);GO:0017017(MAP kinase tyrosine/serine/threonine phosphatase activity)…	04010(MAPK signaling pathway)	ssc-miR-133a-5p	8mer	-0.43225	97	150	-12.92
ciRNA108	chr16	55769468	55769779	+	1	ciRNA	-	ENSSSCT00000018501	DUSP1	mRNA	chr16:55769467-55769808	dual specificity phosphatase 1 [Source:HGNC Symbol;Acc:HGNC:3064]	GO:0005737(cytoplasm);GO:0005634(nucleus);GO:0043407(negative regulation of MAP kinase activity);GO:0042981(regulation of apoptotic process);GO:0035335(peptidyl-tyrosine dephosphorylation);GO:0016311(dephosphorylation);GO:0006470(protein dephosphorylation);GO:0001706(endoderm formation);GO:0000188(inactivation of MAPK activity);GO:0017017(MAP kinase tyrosine/serine/threonine phosphatase activity)…	04010(MAPK signaling pathway)	ssc-miR-138	1a	-0.1663	64	145	-17.19
ciRNA108	chr16	55769468	55769779	+	1	ciRNA	-	ENSSSCT00000018501	DUSP1	mRNA	chr16:55769467-55769808	dual specificity phosphatase 1 [Source:HGNC Symbol;Acc:HGNC:3064]	GO:0005737(cytoplasm);GO:0005634(nucleus);GO:0043407(negative regulation of MAP kinase activity);GO:0042981(regulation of apoptotic process);GO:0035335(peptidyl-tyrosine dephosphorylation);GO:0016311(dephosphorylation);GO:0006470(protein dephosphorylation);GO:0001706(endoderm formation);GO:0000188(inactivation of MAPK activity);GO:0017017(MAP kinase tyrosine/serine/threonine phosphatase activity)…	04010(MAPK signaling pathway)	ssc-miR-155-3p	8mer	-0.45125	98	153	-17.67
ciRNA108	chr16	55769468	55769779	+	1	ciRNA	-	ENSSSCT00000018501	DUSP1	mRNA	chr16:55769467-55769808	dual specificity phosphatase 1 [Source:HGNC Symbol;Acc:HGNC:3064]	GO:0005737(cytoplasm);GO:0005634(nucleus);GO:0043407(negative regulation of MAP kinase activity);GO:0042981(regulation of apoptotic process);GO:0035335(peptidyl-tyrosine dephosphorylation);GO:0016311(dephosphorylation);GO:0006470(protein dephosphorylation);GO:0001706(endoderm formation);GO:0000188(inactivation of MAPK activity);GO:0017017(MAP kinase tyrosine/serine/threonine phosphatase activity)…	04010(MAPK signaling pathway)	ssc-miR-345-3p	m8	-0.2455	87	148	-19.79
ciRNA11	chr2	2989071	2992757	-	1	ciRNA	-	ENSSSCT00000014085	PPP6R3	mRNA	chr2:2989055-2992757	protein phosphatase 6 regulatory subunit 3 [Source:HGNC Symbol;Acc:HGNC:1173]	GO:0005886(plasma membrane);GO:0005829(cytosol);GO:0005654(nucleoplasm);GO:0043666(regulation of phosphoprotein phosphatase activity);GO:0019903(protein phosphatase binding)	NA	ssc-miR-105-1	m8	-0.177	56	145	-10.88
ciRNA11	chr2	2989071	2992757	-	1	ciRNA	-	ENSSSCT00000014085	PPP6R3	mRNA	chr2:2989055-2992757	protein phosphatase 6 regulatory subunit 3 [Source:HGNC Symbol;Acc:HGNC:1173]	GO:0005886(plasma membrane);GO:0005829(cytosol);GO:0005654(nucleoplasm);GO:0043666(regulation of phosphoprotein phosphatase activity);GO:0019903(protein phosphatase binding)	NA	ssc-miR-105-2	m8	-0.177	56	145	-10.88
ciRNA11	chr2	2989071	2992757	-	1	ciRNA	-	ENSSSCT00000014085	PPP6R3	mRNA	chr2:2989055-2992757	protein phosphatase 6 regulatory subunit 3 [Source:HGNC Symbol;Acc:HGNC:1173]	GO:0005886(plasma membrane);GO:0005829(cytosol);GO:0005654(nucleoplasm);GO:0043666(regulation of phosphoprotein phosphatase activity);GO:0019903(protein phosphatase binding)	NA	ssc-miR-125a	8mer	-0.1582	63	147	-28.46
ciRNA11	chr2	2989071	2992757	-	1	ciRNA	-	ENSSSCT00000014085	PPP6R3	mRNA	chr2:2989055-2992757	protein phosphatase 6 regulatory subunit 3 [Source:HGNC Symbol;Acc:HGNC:1173]	GO:0005886(plasma membrane);GO:0005829(cytosol);GO:0005654(nucleoplasm);GO:0043666(regulation of phosphoprotein phosphatase activity);GO:0019903(protein phosphatase binding)	NA	ssc-miR-125b	8mer	-0.1582	65	145	-19.27
ciRNA11	chr2	2989071	2992757	-	1	ciRNA	-	ENSSSCT00000014085	PPP6R3	mRNA	chr2:2989055-2992757	protein phosphatase 6 regulatory subunit 3 [Source:HGNC Symbol;Acc:HGNC:1173]	GO:0005886(plasma membrane);GO:0005829(cytosol);GO:0005654(nucleoplasm);GO:0043666(regulation of phosphoprotein phosphatase activity);GO:0019903(protein phosphatase binding)	NA	ssc-miR-1271	8mer	-0.18515	71	151	-18.9
ciRNA11	chr2	2989071	2992757	-	1	ciRNA	-	ENSSSCT00000014085	PPP6R3	mRNA	chr2:2989055-2992757	protein phosphatase 6 regulatory subunit 3 [Source:HGNC Symbol;Acc:HGNC:1173]	GO:0005886(plasma membrane);GO:0005829(cytosol);GO:0005654(nucleoplasm);GO:0043666(regulation of phosphoprotein phosphatase activity);GO:0019903(protein phosphatase binding)	NA	ssc-miR-129a-3p	m8	-0.256	88	147	-20.5
ciRNA11	chr2	2989071	2992757	-	1	ciRNA	-	ENSSSCT00000014085	PPP6R3	mRNA	chr2:2989055-2992757	protein phosphatase 6 regulatory subunit 3 [Source:HGNC Symbol;Acc:HGNC:1173]	GO:0005886(plasma membrane);GO:0005829(cytosol);GO:0005654(nucleoplasm);GO:0043666(regulation of phosphoprotein phosphatase activity);GO:0019903(protein phosphatase binding)	NA	ssc-miR-1343	8mer	-0.3023	91	140	-17.55
ciRNA11	chr2	2989071	2992757	-	1	ciRNA	-	ENSSSCT00000014085	PPP6R3	mRNA	chr2:2989055-2992757	protein phosphatase 6 regulatory subunit 3 [Source:HGNC Symbol;Acc:HGNC:1173]	GO:0005886(plasma membrane);GO:0005829(cytosol);GO:0005654(nucleoplasm);GO:0043666(regulation of phosphoprotein phosphatase activity);GO:0019903(protein phosphatase binding)	NA	ssc-miR-143-5p	8mer	-0.41815	97	158	-26.74
ciRNA11	chr2	2989071	2992757	-	1	ciRNA	-	ENSSSCT00000014085	PPP6R3	mRNA	chr2:2989055-2992757	protein phosphatase 6 regulatory subunit 3 [Source:HGNC Symbol;Acc:HGNC:1173]	GO:0005886(plasma membrane);GO:0005829(cytosol);GO:0005654(nucleoplasm);GO:0043666(regulation of phosphoprotein phosphatase activity);GO:0019903(protein phosphatase binding)	NA	ssc-miR-149	8mer	-0.2073	81	157	-33.66
ciRNA11	chr2	2989071	2992757	-	1	ciRNA	-	ENSSSCT00000014085	PPP6R3	mRNA	chr2:2989055-2992757	protein phosphatase 6 regulatory subunit 3 [Source:HGNC Symbol;Acc:HGNC:1173]	GO:0005886(plasma membrane);GO:0005829(cytosol);GO:0005654(nucleoplasm);GO:0043666(regulation of phosphoprotein phosphatase activity);GO:0019903(protein phosphatase binding)	NA	ssc-miR-17-3p	m8	-0.13	52	151	-18.8
ciRNA11	chr2	2989071	2992757	-	1	ciRNA	-	ENSSSCT00000014085	PPP6R3	mRNA	chr2:2989055-2992757	protein phosphatase 6 regulatory subunit 3 [Source:HGNC Symbol;Acc:HGNC:1173]	GO:0005886(plasma membrane);GO:0005829(cytosol);GO:0005654(nucleoplasm);GO:0043666(regulation of phosphoprotein phosphatase activity);GO:0019903(protein phosphatase binding)	NA	ssc-miR-199a-5p	8mer	-0.1452	55	160	-21.55
ciRNA11	chr2	2989071	2992757	-	1	ciRNA	-	ENSSSCT00000014085	PPP6R3	mRNA	chr2:2989055-2992757	protein phosphatase 6 regulatory subunit 3 [Source:HGNC Symbol;Acc:HGNC:1173]	GO:0005886(plasma membrane);GO:0005829(cytosol);GO:0005654(nucleoplasm);GO:0043666(regulation of phosphoprotein phosphatase activity);GO:0019903(protein phosphatase binding)	NA	ssc-miR-199b-5p	8mer	-0.1452	55	151	-19.2
ciRNA11	chr2	2989071	2992757	-	1	ciRNA	-	ENSSSCT00000014085	PPP6R3	mRNA	chr2:2989055-2992757	protein phosphatase 6 regulatory subunit 3 [Source:HGNC Symbol;Acc:HGNC:1173]	GO:0005886(plasma membrane);GO:0005829(cytosol);GO:0005654(nucleoplasm);GO:0043666(regulation of phosphoprotein phosphatase activity);GO:0019903(protein phosphatase binding)	NA	ssc-miR-202-5p	8mer	-0.4692	99	149	-11.3
ciRNA11	chr2	2989071	2992757	-	1	ciRNA	-	ENSSSCT00000014085	PPP6R3	mRNA	chr2:2989055-2992757	protein phosphatase 6 regulatory subunit 3 [Source:HGNC Symbol;Acc:HGNC:1173]	GO:0005886(plasma membrane);GO:0005829(cytosol);GO:0005654(nucleoplasm);GO:0043666(regulation of phosphoprotein phosphatase activity);GO:0019903(protein phosphatase binding)	NA	ssc-miR-204	8mer	-0.3573	93	146	-19.37
ciRNA11	chr2	2989071	2992757	-	1	ciRNA	-	ENSSSCT00000014085	PPP6R3	mRNA	chr2:2989055-2992757	protein phosphatase 6 regulatory subunit 3 [Source:HGNC Symbol;Acc:HGNC:1173]	GO:0005886(plasma membrane);GO:0005829(cytosol);GO:0005654(nucleoplasm);GO:0043666(regulation of phosphoprotein phosphatase activity);GO:0019903(protein phosphatase binding)	NA	ssc-miR-2320-5p	8mer	-0.4002	98	142	-19.89
ciRNA11	chr2	2989071	2992757	-	1	ciRNA	-	ENSSSCT00000014085	PPP6R3	mRNA	chr2:2989055-2992757	protein phosphatase 6 regulatory subunit 3 [Source:HGNC Symbol;Acc:HGNC:1173]	GO:0005886(plasma membrane);GO:0005829(cytosol);GO:0005654(nucleoplasm);GO:0043666(regulation of phosphoprotein phosphatase activity);GO:0019903(protein phosphatase binding)	NA	ssc-miR-2483	8mer	-0.4172	95	152	-18.21
ciRNA11	chr2	2989071	2992757	-	1	ciRNA	-	ENSSSCT00000014085	PPP6R3	mRNA	chr2:2989055-2992757	protein phosphatase 6 regulatory subunit 3 [Source:HGNC Symbol;Acc:HGNC:1173]	GO:0005886(plasma membrane);GO:0005829(cytosol);GO:0005654(nucleoplasm);GO:0043666(regulation of phosphoprotein phosphatase activity);GO:0019903(protein phosphatase binding)	NA	ssc-miR-296-3p	m8	-0.132	52	143	-27.65
ciRNA11	chr2	2989071	2992757	-	1	ciRNA	-	ENSSSCT00000014085	PPP6R3	mRNA	chr2:2989055-2992757	protein phosphatase 6 regulatory subunit 3 [Source:HGNC Symbol;Acc:HGNC:1173]	GO:0005886(plasma membrane);GO:0005829(cytosol);GO:0005654(nucleoplasm);GO:0043666(regulation of phosphoprotein phosphatase activity);GO:0019903(protein phosphatase binding)	NA	ssc-miR-30a-3p	8mer	-0.3112	87	159	-17.24
ciRNA11	chr2	2989071	2992757	-	1	ciRNA	-	ENSSSCT00000014085	PPP6R3	mRNA	chr2:2989055-2992757	protein phosphatase 6 regulatory subunit 3 [Source:HGNC Symbol;Acc:HGNC:1173]	GO:0005886(plasma membrane);GO:0005829(cytosol);GO:0005654(nucleoplasm);GO:0043666(regulation of phosphoprotein phosphatase activity);GO:0019903(protein phosphatase binding)	NA	ssc-miR-30c-1-3p	m8	-0.1895	77	149	-20.59
ciRNA11	chr2	2989071	2992757	-	1	ciRNA	-	ENSSSCT00000014085	PPP6R3	mRNA	chr2:2989055-2992757	protein phosphatase 6 regulatory subunit 3 [Source:HGNC Symbol;Acc:HGNC:1173]	GO:0005886(plasma membrane);GO:0005829(cytosol);GO:0005654(nucleoplasm);GO:0043666(regulation of phosphoprotein phosphatase activity);GO:0019903(protein phosphatase binding)	NA	ssc-miR-30c-3p	m8	-0.174	70	146	-18.72
ciRNA11	chr2	2989071	2992757	-	1	ciRNA	-	ENSSSCT00000014085	PPP6R3	mRNA	chr2:2989055-2992757	protein phosphatase 6 regulatory subunit 3 [Source:HGNC Symbol;Acc:HGNC:1173]	GO:0005886(plasma membrane);GO:0005829(cytosol);GO:0005654(nucleoplasm);GO:0043666(regulation of phosphoprotein phosphatase activity);GO:0019903(protein phosphatase binding)	NA	ssc-miR-30e-3p	8mer	-0.30915	86	153	-12.61
ciRNA11	chr2	2989071	2992757	-	1	ciRNA	-	ENSSSCT00000014085	PPP6R3	mRNA	chr2:2989055-2992757	protein phosphatase 6 regulatory subunit 3 [Source:HGNC Symbol;Acc:HGNC:1173]	GO:0005886(plasma membrane);GO:0005829(cytosol);GO:0005654(nucleoplasm);GO:0043666(regulation of phosphoprotein phosphatase activity);GO:0019903(protein phosphatase binding)	NA	ssc-miR-383	8mer	-0.2372	84	166	-25.04
ciRNA11	chr2	2989071	2992757	-	1	ciRNA	-	ENSSSCT00000014085	PPP6R3	mRNA	chr2:2989055-2992757	protein phosphatase 6 regulatory subunit 3 [Source:HGNC Symbol;Acc:HGNC:1173]	GO:0005886(plasma membrane);GO:0005829(cytosol);GO:0005654(nucleoplasm);GO:0043666(regulation of phosphoprotein phosphatase activity);GO:0019903(protein phosphatase binding)	NA	ssc-miR-450b-3p	m8	-0.155	67	149	-15.5
ciRNA11	chr2	2989071	2992757	-	1	ciRNA	-	ENSSSCT00000014085	PPP6R3	mRNA	chr2:2989055-2992757	protein phosphatase 6 regulatory subunit 3 [Source:HGNC Symbol;Acc:HGNC:1173]	GO:0005886(plasma membrane);GO:0005829(cytosol);GO:0005654(nucleoplasm);GO:0043666(regulation of phosphoprotein phosphatase activity);GO:0019903(protein phosphatase binding)	NA	ssc-miR-486	m8	-0.193	71	144	-26.8
ciRNA11	chr2	2989071	2992757	-	1	ciRNA	-	ENSSSCT00000014085	PPP6R3	mRNA	chr2:2989055-2992757	protein phosphatase 6 regulatory subunit 3 [Source:HGNC Symbol;Acc:HGNC:1173]	GO:0005886(plasma membrane);GO:0005829(cytosol);GO:0005654(nucleoplasm);GO:0043666(regulation of phosphoprotein phosphatase activity);GO:0019903(protein phosphatase binding)	NA	ssc-miR-490-5p	8mer	-0.2483	84	152	-18.68
ciRNA11	chr2	2989071	2992757	-	1	ciRNA	-	ENSSSCT00000014085	PPP6R3	mRNA	chr2:2989055-2992757	protein phosphatase 6 regulatory subunit 3 [Source:HGNC Symbol;Acc:HGNC:1173]	GO:0005886(plasma membrane);GO:0005829(cytosol);GO:0005654(nucleoplasm);GO:0043666(regulation of phosphoprotein phosphatase activity);GO:0019903(protein phosphatase binding)	NA	ssc-miR-491	8mer	-0.12825	53	152	-22.14
ciRNA11	chr2	2989071	2992757	-	1	ciRNA	-	ENSSSCT00000014085	PPP6R3	mRNA	chr2:2989055-2992757	protein phosphatase 6 regulatory subunit 3 [Source:HGNC Symbol;Acc:HGNC:1173]	GO:0005886(plasma membrane);GO:0005829(cytosol);GO:0005654(nucleoplasm);GO:0043666(regulation of phosphoprotein phosphatase activity);GO:0019903(protein phosphatase binding)	NA	ssc-miR-505	8mer	-0.2542	83	144	-17.22
ciRNA11	chr2	2989071	2992757	-	1	ciRNA	-	ENSSSCT00000014085	PPP6R3	mRNA	chr2:2989055-2992757	protein phosphatase 6 regulatory subunit 3 [Source:HGNC Symbol;Acc:HGNC:1173]	GO:0005886(plasma membrane);GO:0005829(cytosol);GO:0005654(nucleoplasm);GO:0043666(regulation of phosphoprotein phosphatase activity);GO:0019903(protein phosphatase binding)	NA	ssc-miR-545-5p	8mer	-0.27515	82	146	-15.26
ciRNA11	chr2	2989071	2992757	-	1	ciRNA	-	ENSSSCT00000014085	PPP6R3	mRNA	chr2:2989055-2992757	protein phosphatase 6 regulatory subunit 3 [Source:HGNC Symbol;Acc:HGNC:1173]	GO:0005886(plasma membrane);GO:0005829(cytosol);GO:0005654(nucleoplasm);GO:0043666(regulation of phosphoprotein phosphatase activity);GO:0019903(protein phosphatase binding)	NA	ssc-miR-615	8mer	-0.1222	52	143	-34.2
ciRNA11	chr2	2989071	2992757	-	1	ciRNA	-	ENSSSCT00000014085	PPP6R3	mRNA	chr2:2989055-2992757	protein phosphatase 6 regulatory subunit 3 [Source:HGNC Symbol;Acc:HGNC:1173]	GO:0005886(plasma membrane);GO:0005829(cytosol);GO:0005654(nucleoplasm);GO:0043666(regulation of phosphoprotein phosphatase activity);GO:0019903(protein phosphatase binding)	NA	ssc-miR-676-5p	m8	-0.1645	54	143	-12.89
ciRNA11	chr2	2989071	2992757	-	1	ciRNA	-	ENSSSCT00000014085	PPP6R3	mRNA	chr2:2989055-2992757	protein phosphatase 6 regulatory subunit 3 [Source:HGNC Symbol;Acc:HGNC:1173]	GO:0005886(plasma membrane);GO:0005829(cytosol);GO:0005654(nucleoplasm);GO:0043666(regulation of phosphoprotein phosphatase activity);GO:0019903(protein phosphatase binding)	NA	ssc-miR-7137-3p	8mer	-0.31415	90	147	-27.07
ciRNA11	chr2	2989071	2992757	-	1	ciRNA	-	ENSSSCT00000014085	PPP6R3	mRNA	chr2:2989055-2992757	protein phosphatase 6 regulatory subunit 3 [Source:HGNC Symbol;Acc:HGNC:1173]	GO:0005886(plasma membrane);GO:0005829(cytosol);GO:0005654(nucleoplasm);GO:0043666(regulation of phosphoprotein phosphatase activity);GO:0019903(protein phosphatase binding)	NA	ssc-miR-7142-5p	8mer	-0.1432	67	154	-23.91
ciRNA11	chr2	2989071	2992757	-	1	ciRNA	-	ENSSSCT00000014085	PPP6R3	mRNA	chr2:2989055-2992757	protein phosphatase 6 regulatory subunit 3 [Source:HGNC Symbol;Acc:HGNC:1173]	GO:0005886(plasma membrane);GO:0005829(cytosol);GO:0005654(nucleoplasm);GO:0043666(regulation of phosphoprotein phosphatase activity);GO:0019903(protein phosphatase binding)	NA	ssc-miR-9830-5p	8mer	-0.2331	79	143	-15.39
ciRNA11	chr2	2989071	2992757	-	1	ciRNA	-	ENSSSCT00000014085	PPP6R3	mRNA	chr2:2989055-2992757	protein phosphatase 6 regulatory subunit 3 [Source:HGNC Symbol;Acc:HGNC:1173]	GO:0005886(plasma membrane);GO:0005829(cytosol);GO:0005654(nucleoplasm);GO:0043666(regulation of phosphoprotein phosphatase activity);GO:0019903(protein phosphatase binding)	NA	ssc-miR-9835-3p	8mer	-0.12625	50	154	-24.87
ciRNA11	chr2	2989071	2992757	-	1	ciRNA	-	ENSSSCT00000014085	PPP6R3	mRNA	chr2:2989055-2992757	protein phosphatase 6 regulatory subunit 3 [Source:HGNC Symbol;Acc:HGNC:1173]	GO:0005886(plasma membrane);GO:0005829(cytosol);GO:0005654(nucleoplasm);GO:0043666(regulation of phosphoprotein phosphatase activity);GO:0019903(protein phosphatase binding)	NA	ssc-miR-9840-3p	8mer	-0.2394	83	157	-25.61
ciRNA110	chr14	120438333	120438864	+	1	ciRNA	-	ENSSSCT00000011534	ABCC2	mRNA	chr14:120438332-120438899	ATP binding cassette subfamily C member 2 [Source:HGNC Symbol;Acc:HGNC:53]	GO:0046581(intercellular canaliculus);GO:0016324(apical plasma membrane);GO:0016021(integral component of membrane);GO:0016020(membrane);GO:0009986(cell surface);GO:0005887(integral component of plasma membrane);GO:0055085(transmembrane transport);GO:0032870(cellular response to hormone stimulus);GO:0015711(organic anion transport);GO:0006810(transport);GO:0042626(ATPase activity, coupled to tran…	02010(ABC transporters);04976(Bile secretion)	ssc-miR-103	m8	-0.167	68	140	-14.22
ciRNA110	chr14	120438333	120438864	+	1	ciRNA	-	ENSSSCT00000011534	ABCC2	mRNA	chr14:120438332-120438899	ATP binding cassette subfamily C member 2 [Source:HGNC Symbol;Acc:HGNC:53]	GO:0046581(intercellular canaliculus);GO:0016324(apical plasma membrane);GO:0016021(integral component of membrane);GO:0016020(membrane);GO:0009986(cell surface);GO:0005887(integral component of plasma membrane);GO:0055085(transmembrane transport);GO:0032870(cellular response to hormone stimulus);GO:0015711(organic anion transport);GO:0006810(transport);GO:0042626(ATPase activity, coupled to tran…	02010(ABC transporters);04976(Bile secretion)	ssc-miR-107	m8	-0.167	68	140	-14.22
ciRNA110	chr14	120438333	120438864	+	1	ciRNA	-	ENSSSCT00000011534	ABCC2	mRNA	chr14:120438332-120438899	ATP binding cassette subfamily C member 2 [Source:HGNC Symbol;Acc:HGNC:53]	GO:0046581(intercellular canaliculus);GO:0016324(apical plasma membrane);GO:0016021(integral component of membrane);GO:0016020(membrane);GO:0009986(cell surface);GO:0005887(integral component of plasma membrane);GO:0055085(transmembrane transport);GO:0032870(cellular response to hormone stimulus);GO:0015711(organic anion transport);GO:0006810(transport);GO:0042626(ATPase activity, coupled to tran…	02010(ABC transporters);04976(Bile secretion)	ssc-miR-15a	m8	-0.2165	75	148	-12.49
ciRNA110	chr14	120438333	120438864	+	1	ciRNA	-	ENSSSCT00000011534	ABCC2	mRNA	chr14:120438332-120438899	ATP binding cassette subfamily C member 2 [Source:HGNC Symbol;Acc:HGNC:53]	GO:0046581(intercellular canaliculus);GO:0016324(apical plasma membrane);GO:0016021(integral component of membrane);GO:0016020(membrane);GO:0009986(cell surface);GO:0005887(integral component of plasma membrane);GO:0055085(transmembrane transport);GO:0032870(cellular response to hormone stimulus);GO:0015711(organic anion transport);GO:0006810(transport);GO:0042626(ATPase activity, coupled to tran…	02010(ABC transporters);04976(Bile secretion)	ssc-miR-16	m8	-0.232	79	158	-13.03
ciRNA110	chr14	120438333	120438864	+	1	ciRNA	-	ENSSSCT00000011534	ABCC2	mRNA	chr14:120438332-120438899	ATP binding cassette subfamily C member 2 [Source:HGNC Symbol;Acc:HGNC:53]	GO:0046581(intercellular canaliculus);GO:0016324(apical plasma membrane);GO:0016021(integral component of membrane);GO:0016020(membrane);GO:0009986(cell surface);GO:0005887(integral component of plasma membrane);GO:0055085(transmembrane transport);GO:0032870(cellular response to hormone stimulus);GO:0015711(organic anion transport);GO:0006810(transport);GO:0042626(ATPase activity, coupled to tran…	02010(ABC transporters);04976(Bile secretion)	ssc-miR-195	m8	-0.232	80	153	-13.66
ciRNA110	chr14	120438333	120438864	+	1	ciRNA	-	ENSSSCT00000011534	ABCC2	mRNA	chr14:120438332-120438899	ATP binding cassette subfamily C member 2 [Source:HGNC Symbol;Acc:HGNC:53]	GO:0046581(intercellular canaliculus);GO:0016324(apical plasma membrane);GO:0016021(integral component of membrane);GO:0016020(membrane);GO:0009986(cell surface);GO:0005887(integral component of plasma membrane);GO:0055085(transmembrane transport);GO:0032870(cellular response to hormone stimulus);GO:0015711(organic anion transport);GO:0006810(transport);GO:0042626(ATPase activity, coupled to tran…	02010(ABC transporters);04976(Bile secretion)	ssc-miR-217	m8	-0.2085	74	147	-17.28
ciRNA110	chr14	120438333	120438864	+	1	ciRNA	-	ENSSSCT00000011534	ABCC2	mRNA	chr14:120438332-120438899	ATP binding cassette subfamily C member 2 [Source:HGNC Symbol;Acc:HGNC:53]	GO:0046581(intercellular canaliculus);GO:0016324(apical plasma membrane);GO:0016021(integral component of membrane);GO:0016020(membrane);GO:0009986(cell surface);GO:0005887(integral component of plasma membrane);GO:0055085(transmembrane transport);GO:0032870(cellular response to hormone stimulus);GO:0015711(organic anion transport);GO:0006810(transport);GO:0042626(ATPase activity, coupled to tran…	02010(ABC transporters);04976(Bile secretion)	ssc-miR-27a	m8	-0.27	81	144	-11.69
ciRNA110	chr14	120438333	120438864	+	1	ciRNA	-	ENSSSCT00000011534	ABCC2	mRNA	chr14:120438332-120438899	ATP binding cassette subfamily C member 2 [Source:HGNC Symbol;Acc:HGNC:53]	GO:0046581(intercellular canaliculus);GO:0016324(apical plasma membrane);GO:0016021(integral component of membrane);GO:0016020(membrane);GO:0009986(cell surface);GO:0005887(integral component of plasma membrane);GO:0055085(transmembrane transport);GO:0032870(cellular response to hormone stimulus);GO:0015711(organic anion transport);GO:0006810(transport);GO:0042626(ATPase activity, coupled to tran…	02010(ABC transporters);04976(Bile secretion)	ssc-miR-27b-3p	m8	-0.27	81	144	-13.37
ciRNA110	chr14	120438333	120438864	+	1	ciRNA	-	ENSSSCT00000011534	ABCC2	mRNA	chr14:120438332-120438899	ATP binding cassette subfamily C member 2 [Source:HGNC Symbol;Acc:HGNC:53]	GO:0046581(intercellular canaliculus);GO:0016324(apical plasma membrane);GO:0016021(integral component of membrane);GO:0016020(membrane);GO:0009986(cell surface);GO:0005887(integral component of plasma membrane);GO:0055085(transmembrane transport);GO:0032870(cellular response to hormone stimulus);GO:0015711(organic anion transport);GO:0006810(transport);GO:0042626(ATPase activity, coupled to tran…	02010(ABC transporters);04976(Bile secretion)	ssc-miR-28-3p	m8	-0.1835	67	153	-14.04
ciRNA110	chr14	120438333	120438864	+	1	ciRNA	-	ENSSSCT00000011534	ABCC2	mRNA	chr14:120438332-120438899	ATP binding cassette subfamily C member 2 [Source:HGNC Symbol;Acc:HGNC:53]	GO:0046581(intercellular canaliculus);GO:0016324(apical plasma membrane);GO:0016021(integral component of membrane);GO:0016020(membrane);GO:0009986(cell surface);GO:0005887(integral component of plasma membrane);GO:0055085(transmembrane transport);GO:0032870(cellular response to hormone stimulus);GO:0015711(organic anion transport);GO:0006810(transport);GO:0042626(ATPase activity, coupled to tran…	02010(ABC transporters);04976(Bile secretion)	ssc-miR-326	m8	-0.143	58	141	-22.42
ciRNA110	chr14	120438333	120438864	+	1	ciRNA	-	ENSSSCT00000011534	ABCC2	mRNA	chr14:120438332-120438899	ATP binding cassette subfamily C member 2 [Source:HGNC Symbol;Acc:HGNC:53]	GO:0046581(intercellular canaliculus);GO:0016324(apical plasma membrane);GO:0016021(integral component of membrane);GO:0016020(membrane);GO:0009986(cell surface);GO:0005887(integral component of plasma membrane);GO:0055085(transmembrane transport);GO:0032870(cellular response to hormone stimulus);GO:0015711(organic anion transport);GO:0006810(transport);GO:0042626(ATPase activity, coupled to tran…	02010(ABC transporters);04976(Bile secretion)	ssc-miR-331-3p	m8	-0.1615	69	145	-18
ciRNA110	chr14	120438333	120438864	+	1	ciRNA	-	ENSSSCT00000011534	ABCC2	mRNA	chr14:120438332-120438899	ATP binding cassette subfamily C member 2 [Source:HGNC Symbol;Acc:HGNC:53]	GO:0046581(intercellular canaliculus);GO:0016324(apical plasma membrane);GO:0016021(integral component of membrane);GO:0016020(membrane);GO:0009986(cell surface);GO:0005887(integral component of plasma membrane);GO:0055085(transmembrane transport);GO:0032870(cellular response to hormone stimulus);GO:0015711(organic anion transport);GO:0006810(transport);GO:0042626(ATPase activity, coupled to tran…	02010(ABC transporters);04976(Bile secretion)	ssc-miR-361-3p	8mer	-0.24915	84	143	-19.63
ciRNA110	chr14	120438333	120438864	+	1	ciRNA	-	ENSSSCT00000011534	ABCC2	mRNA	chr14:120438332-120438899	ATP binding cassette subfamily C member 2 [Source:HGNC Symbol;Acc:HGNC:53]	GO:0046581(intercellular canaliculus);GO:0016324(apical plasma membrane);GO:0016021(integral component of membrane);GO:0016020(membrane);GO:0009986(cell surface);GO:0005887(integral component of plasma membrane);GO:0055085(transmembrane transport);GO:0032870(cellular response to hormone stimulus);GO:0015711(organic anion transport);GO:0006810(transport);GO:0042626(ATPase activity, coupled to tran…	02010(ABC transporters);04976(Bile secretion)	ssc-miR-371-5p	8mer	-0.33705	90	142	-12.56
ciRNA110	chr14	120438333	120438864	+	1	ciRNA	-	ENSSSCT00000011534	ABCC2	mRNA	chr14:120438332-120438899	ATP binding cassette subfamily C member 2 [Source:HGNC Symbol;Acc:HGNC:53]	GO:0046581(intercellular canaliculus);GO:0016324(apical plasma membrane);GO:0016021(integral component of membrane);GO:0016020(membrane);GO:0009986(cell surface);GO:0005887(integral component of plasma membrane);GO:0055085(transmembrane transport);GO:0032870(cellular response to hormone stimulus);GO:0015711(organic anion transport);GO:0006810(transport);GO:0042626(ATPase activity, coupled to tran…	02010(ABC transporters);04976(Bile secretion)	ssc-miR-424-5p	m8	-0.2165	74	149	-11.48
ciRNA110	chr14	120438333	120438864	+	1	ciRNA	-	ENSSSCT00000011534	ABCC2	mRNA	chr14:120438332-120438899	ATP binding cassette subfamily C member 2 [Source:HGNC Symbol;Acc:HGNC:53]	GO:0046581(intercellular canaliculus);GO:0016324(apical plasma membrane);GO:0016021(integral component of membrane);GO:0016020(membrane);GO:0009986(cell surface);GO:0005887(integral component of plasma membrane);GO:0055085(transmembrane transport);GO:0032870(cellular response to hormone stimulus);GO:0015711(organic anion transport);GO:0006810(transport);GO:0042626(ATPase activity, coupled to tran…	02010(ABC transporters);04976(Bile secretion)	ssc-miR-497	m8	-0.201	71	143	-11.96
ciRNA110	chr14	120438333	120438864	+	1	ciRNA	-	ENSSSCT00000011534	ABCC2	mRNA	chr14:120438332-120438899	ATP binding cassette subfamily C member 2 [Source:HGNC Symbol;Acc:HGNC:53]	GO:0046581(intercellular canaliculus);GO:0016324(apical plasma membrane);GO:0016021(integral component of membrane);GO:0016020(membrane);GO:0009986(cell surface);GO:0005887(integral component of plasma membrane);GO:0055085(transmembrane transport);GO:0032870(cellular response to hormone stimulus);GO:0015711(organic anion transport);GO:0006810(transport);GO:0042626(ATPase activity, coupled to tran…	02010(ABC transporters);04976(Bile secretion)	ssc-miR-532-3p	m8	-0.209	77	153	-26.8
ciRNA110	chr14	120438333	120438864	+	1	ciRNA	-	ENSSSCT00000011534	ABCC2	mRNA	chr14:120438332-120438899	ATP binding cassette subfamily C member 2 [Source:HGNC Symbol;Acc:HGNC:53]	GO:0046581(intercellular canaliculus);GO:0016324(apical plasma membrane);GO:0016021(integral component of membrane);GO:0016020(membrane);GO:0009986(cell surface);GO:0005887(integral component of plasma membrane);GO:0055085(transmembrane transport);GO:0032870(cellular response to hormone stimulus);GO:0015711(organic anion transport);GO:0006810(transport);GO:0042626(ATPase activity, coupled to tran…	02010(ABC transporters);04976(Bile secretion)	ssc-miR-769-3p	m8	-0.211	82	156	-29.98
ciRNA110	chr14	120438333	120438864	+	1	ciRNA	-	ENSSSCT00000011534	ABCC2	mRNA	chr14:120438332-120438899	ATP binding cassette subfamily C member 2 [Source:HGNC Symbol;Acc:HGNC:53]	GO:0046581(intercellular canaliculus);GO:0016324(apical plasma membrane);GO:0016021(integral component of membrane);GO:0016020(membrane);GO:0009986(cell surface);GO:0005887(integral component of plasma membrane);GO:0055085(transmembrane transport);GO:0032870(cellular response to hormone stimulus);GO:0015711(organic anion transport);GO:0006810(transport);GO:0042626(ATPase activity, coupled to tran…	02010(ABC transporters);04976(Bile secretion)	ssc-miR-769-5p	m8	-0.156	60	154	-20.77
ciRNA110	chr14	120438333	120438864	+	1	ciRNA	-	ENSSSCT00000011534	ABCC2	mRNA	chr14:120438332-120438899	ATP binding cassette subfamily C member 2 [Source:HGNC Symbol;Acc:HGNC:53]	GO:0046581(intercellular canaliculus);GO:0016324(apical plasma membrane);GO:0016021(integral component of membrane);GO:0016020(membrane);GO:0009986(cell surface);GO:0005887(integral component of plasma membrane);GO:0055085(transmembrane transport);GO:0032870(cellular response to hormone stimulus);GO:0015711(organic anion transport);GO:0006810(transport);GO:0042626(ATPase activity, coupled to tran…	02010(ABC transporters);04976(Bile secretion)	ssc-miR-9793-5p	m8	-0.1795	68	158	-21.36
ciRNA110	chr14	120438333	120438864	+	1	ciRNA	-	ENSSSCT00000011534	ABCC2	mRNA	chr14:120438332-120438899	ATP binding cassette subfamily C member 2 [Source:HGNC Symbol;Acc:HGNC:53]	GO:0046581(intercellular canaliculus);GO:0016324(apical plasma membrane);GO:0016021(integral component of membrane);GO:0016020(membrane);GO:0009986(cell surface);GO:0005887(integral component of plasma membrane);GO:0055085(transmembrane transport);GO:0032870(cellular response to hormone stimulus);GO:0015711(organic anion transport);GO:0006810(transport);GO:0042626(ATPase activity, coupled to tran…	02010(ABC transporters);04976(Bile secretion)	ssc-miR-9820-5p	m8	-0.198	76	163	-25.2
ciRNA111	chrX	65862801	65863160	-	1	ciRNA	-	ENSSSCT00000013564	RPS4X	mRNA	chrX:65862800-65863160	ribosomal protein S4, X-linked [Source:HGNC Symbol;Acc:HGNC:10424]	GO:0070062(extracellular exosome);GO:0036464(cytoplasmic ribonucleoprotein granule);GO:0031012(extracellular matrix);GO:0030529(intracellular ribonucleoprotein complex);GO:0022627(cytosolic small ribosomal subunit);GO:0016020(membrane);GO:0015935(small ribosomal subunit);GO:0005925(focal adhesion);GO:0005844(polysome);GO:0005840(ribosome);GO:0005622(intracellular);GO:0045727(positive regulation o…	03010(Ribosome)	ssc-miR-146a-5p	m8	-0.282	85	164	-20.14
ciRNA111	chrX	65862801	65863160	-	1	ciRNA	-	ENSSSCT00000013564	RPS4X	mRNA	chrX:65862800-65863160	ribosomal protein S4, X-linked [Source:HGNC Symbol;Acc:HGNC:10424]	GO:0070062(extracellular exosome);GO:0036464(cytoplasmic ribonucleoprotein granule);GO:0031012(extracellular matrix);GO:0030529(intracellular ribonucleoprotein complex);GO:0022627(cytosolic small ribosomal subunit);GO:0016020(membrane);GO:0015935(small ribosomal subunit);GO:0005925(focal adhesion);GO:0005844(polysome);GO:0005840(ribosome);GO:0005622(intracellular);GO:0045727(positive regulation o…	03010(Ribosome)	ssc-miR-146b	m8	-0.282	85	162	-17.45
ciRNA111	chrX	65862801	65863160	-	1	ciRNA	-	ENSSSCT00000013564	RPS4X	mRNA	chrX:65862800-65863160	ribosomal protein S4, X-linked [Source:HGNC Symbol;Acc:HGNC:10424]	GO:0070062(extracellular exosome);GO:0036464(cytoplasmic ribonucleoprotein granule);GO:0031012(extracellular matrix);GO:0030529(intracellular ribonucleoprotein complex);GO:0022627(cytosolic small ribosomal subunit);GO:0016020(membrane);GO:0015935(small ribosomal subunit);GO:0005925(focal adhesion);GO:0005844(polysome);GO:0005840(ribosome);GO:0005622(intracellular);GO:0045727(positive regulation o…	03010(Ribosome)	ssc-miR-92b-5p	m8	-0.1785	83	148	-24.85
ciRNA111	chrX	65862801	65863160	-	1	ciRNA	-	ENSSSCT00000013564	RPS4X	mRNA	chrX:65862800-65863160	ribosomal protein S4, X-linked [Source:HGNC Symbol;Acc:HGNC:10424]	GO:0070062(extracellular exosome);GO:0036464(cytoplasmic ribonucleoprotein granule);GO:0031012(extracellular matrix);GO:0030529(intracellular ribonucleoprotein complex);GO:0022627(cytosolic small ribosomal subunit);GO:0016020(membrane);GO:0015935(small ribosomal subunit);GO:0005925(focal adhesion);GO:0005844(polysome);GO:0005840(ribosome);GO:0005622(intracellular);GO:0045727(positive regulation o…	03010(Ribosome)	ssc-miR-9832-3p	m8	-0.314	89	151	-20.18
ciRNA112	chr7	53460776	53461060	+	1	ciRNA	-	ENSSSCT00000001974	ADAMTS7	mRNA	chr7:53460775-53461085	ADAM metallopeptidase with thrombospondin type 1 motif 7 [Source:HGNC Symbol;Acc:HGNC:223]	GO:0031012(extracellular matrix);GO:0009986(cell surface);GO:0005615(extracellular space);GO:0005578(proteinaceous extracellular matrix);GO:0071773(cellular response to BMP stimulus);GO:0071356(cellular response to tumor necrosis factor);GO:0071347(cellular response to interleukin-1);GO:0051603(proteolysis involved in cellular protein catabolic process);GO:0032331(negative regulation of chondrocy…	NA	ssc-miR-221-5p	m8	-0.128	51	154	-20.15
ciRNA112	chr7	53460776	53461060	+	1	ciRNA	-	ENSSSCT00000001974	ADAMTS7	mRNA	chr7:53460775-53461085	ADAM metallopeptidase with thrombospondin type 1 motif 7 [Source:HGNC Symbol;Acc:HGNC:223]	GO:0031012(extracellular matrix);GO:0009986(cell surface);GO:0005615(extracellular space);GO:0005578(proteinaceous extracellular matrix);GO:0071773(cellular response to BMP stimulus);GO:0071356(cellular response to tumor necrosis factor);GO:0071347(cellular response to interleukin-1);GO:0051603(proteolysis involved in cellular protein catabolic process);GO:0032331(negative regulation of chondrocy…	NA	ssc-miR-328	m8	-0.178	79	143	-20.87
ciRNA112	chr7	53460776	53461060	+	1	ciRNA	-	ENSSSCT00000001974	ADAMTS7	mRNA	chr7:53460775-53461085	ADAM metallopeptidase with thrombospondin type 1 motif 7 [Source:HGNC Symbol;Acc:HGNC:223]	GO:0031012(extracellular matrix);GO:0009986(cell surface);GO:0005615(extracellular space);GO:0005578(proteinaceous extracellular matrix);GO:0071773(cellular response to BMP stimulus);GO:0071356(cellular response to tumor necrosis factor);GO:0071347(cellular response to interleukin-1);GO:0051603(proteolysis involved in cellular protein catabolic process);GO:0032331(negative regulation of chondrocy…	NA	ssc-miR-455-5p	m8	-0.154	53	140	-14.87
ciRNA113	chr6	181324	181551	+	1	ciRNA	-	ENSSSCT00000027926	ENSSSCG00000029761	mRNA	chr6:181323-181573	NA	GO:0005739(mitochondrion);GO:0006144(purine nucleobase metabolic process);GO:0033971(hydroxyisourate hydrolase activity);GO:0016787(hydrolase activity)	00230(Purine metabolism)	ssc-miR-361-3p	8mer	-0.2582	85	153	-19.93
ciRNA113	chr6	181324	181551	+	1	ciRNA	-	ENSSSCT00000027926	ENSSSCG00000029761	mRNA	chr6:181323-181573	NA	GO:0005739(mitochondrion);GO:0006144(purine nucleobase metabolic process);GO:0033971(hydroxyisourate hydrolase activity);GO:0016787(hydrolase activity)	00230(Purine metabolism)	ssc-miR-9854-5p	m8	-0.11	54	151	-12.45
ciRNA114	chr6	397293	397517	+	1	ciRNA	-	ENSSSCT00000031647	FANCA	mRNA	chr6:397292-397543	Fanconi anemia complementation group A [Source:HGNC Symbol;Acc:HGNC:3582]	GO:0043240(Fanconi anaemia nuclear complex);GO:0005634(nucleus);GO:2000348(regulation of CD40 signaling pathway);GO:0051090(regulation of sequence-specific DNA binding transcription factor activity);GO:0050727(regulation of inflammatory response);GO:0045589(regulation of regulatory T cell differentiation);GO:0042127(regulation of cell proliferation);GO:0008585(female gonad development);GO:0008584…	03460(Fanconi anemia pathway)	ssc-miR-9805-3p	8mer	-0.28115	89	154	-24.47
ciRNA114	chr6	397293	397517	+	1	ciRNA	-	ENSSSCT00000031647	FANCA	mRNA	chr6:397292-397543	Fanconi anemia complementation group A [Source:HGNC Symbol;Acc:HGNC:3582]	GO:0043240(Fanconi anaemia nuclear complex);GO:0005634(nucleus);GO:2000348(regulation of CD40 signaling pathway);GO:0051090(regulation of sequence-specific DNA binding transcription factor activity);GO:0050727(regulation of inflammatory response);GO:0045589(regulation of regulatory T cell differentiation);GO:0042127(regulation of cell proliferation);GO:0008585(female gonad development);GO:0008584…	03460(Fanconi anemia pathway)	ssc-miR-9824-5p	m8	-0.16	66	147	-22.8
ciRNA116	chr6	47654993	47655273	+	1	ciRNA	-	ENSSSCT00000003437	PPP5C	mRNA	chr6:47654992-47655293	protein phosphatase 5 catalytic subunit [Source:HGNC Symbol;Acc:HGNC:9322]	GO:0043234(protein complex);GO:0043231(intracellular membrane-bounded organelle);GO:0005829(cytosol);GO:0043278(response to morphine);GO:0043123(positive regulation of I-kappaB kinase/NF-kappaB signaling);GO:0007165(signal transduction);GO:0006470(protein dephosphorylation);GO:0043531(ADP binding);GO:0042802(identical protein binding);GO:0016787(hydrolase activity);GO:0005524(ATP binding);GO:0004…	04010(MAPK signaling pathway)	ssc-miR-2320-5p	m8	-0.169	64	143	-20.05
ciRNA116	chr6	47654993	47655273	+	1	ciRNA	-	ENSSSCT00000003437	PPP5C	mRNA	chr6:47654992-47655293	protein phosphatase 5 catalytic subunit [Source:HGNC Symbol;Acc:HGNC:9322]	GO:0043234(protein complex);GO:0043231(intracellular membrane-bounded organelle);GO:0005829(cytosol);GO:0043278(response to morphine);GO:0043123(positive regulation of I-kappaB kinase/NF-kappaB signaling);GO:0007165(signal transduction);GO:0006470(protein dephosphorylation);GO:0043531(ADP binding);GO:0042802(identical protein binding);GO:0016787(hydrolase activity);GO:0005524(ATP binding);GO:0004…	04010(MAPK signaling pathway)	ssc-miR-423-5p	m8	-0.124	62	171	-30.86
ciRNA116	chr6	47654993	47655273	+	1	ciRNA	-	ENSSSCT00000003437	PPP5C	mRNA	chr6:47654992-47655293	protein phosphatase 5 catalytic subunit [Source:HGNC Symbol;Acc:HGNC:9322]	GO:0043234(protein complex);GO:0043231(intracellular membrane-bounded organelle);GO:0005829(cytosol);GO:0043278(response to morphine);GO:0043123(positive regulation of I-kappaB kinase/NF-kappaB signaling);GO:0007165(signal transduction);GO:0006470(protein dephosphorylation);GO:0043531(ADP binding);GO:0042802(identical protein binding);GO:0016787(hydrolase activity);GO:0005524(ATP binding);GO:0004…	04010(MAPK signaling pathway)	ssc-miR-491	8mer	-0.19215	71	140	-18.99
ciRNA117	chr5	19138887	19139082	-	1	ciRNA	-	ENSSSCT00000000295	MAP3K12	mRNA	chr5:19138881-19139082	mitogen-activated protein kinase kinase kinase 12 [Source:HGNC Symbol;Acc:HGNC:6851]	GO:0030426(growth cone);GO:0030424(axon);GO:0005886(plasma membrane);GO:0005829(cytosol);GO:0005737(cytoplasm);GO:2000672(negative regulation of motor neuron apoptotic process);GO:0046777(protein autophosphorylation);GO:0018107(peptidyl-threonine phosphorylation);GO:0018105(peptidyl-serine phosphorylation);GO:0016572(histone phosphorylation);GO:0016310(phosphorylation);GO:0007254(JNK cascade);GO:…	04010(MAPK signaling pathway)	ssc-miR-185	8mer	-0.2202	77	140	-16.46
ciRNA117	chr5	19138887	19139082	-	1	ciRNA	-	ENSSSCT00000000295	MAP3K12	mRNA	chr5:19138881-19139082	mitogen-activated protein kinase kinase kinase 12 [Source:HGNC Symbol;Acc:HGNC:6851]	GO:0030426(growth cone);GO:0030424(axon);GO:0005886(plasma membrane);GO:0005829(cytosol);GO:0005737(cytoplasm);GO:2000672(negative regulation of motor neuron apoptotic process);GO:0046777(protein autophosphorylation);GO:0018107(peptidyl-threonine phosphorylation);GO:0018105(peptidyl-serine phosphorylation);GO:0016572(histone phosphorylation);GO:0016310(phosphorylation);GO:0007254(JNK cascade);GO:…	04010(MAPK signaling pathway)	ssc-miR-2411	8mer	-0.35215	92	147	-19.52
ciRNA117	chr5	19138887	19139082	-	1	ciRNA	-	ENSSSCT00000000295	MAP3K12	mRNA	chr5:19138881-19139082	mitogen-activated protein kinase kinase kinase 12 [Source:HGNC Symbol;Acc:HGNC:6851]	GO:0030426(growth cone);GO:0030424(axon);GO:0005886(plasma membrane);GO:0005829(cytosol);GO:0005737(cytoplasm);GO:2000672(negative regulation of motor neuron apoptotic process);GO:0046777(protein autophosphorylation);GO:0018107(peptidyl-threonine phosphorylation);GO:0018105(peptidyl-serine phosphorylation);GO:0016572(histone phosphorylation);GO:0016310(phosphorylation);GO:0007254(JNK cascade);GO:…	04010(MAPK signaling pathway)	ssc-miR-450b-5p	m8	-0.203	70	146	-12.3
ciRNA117	chr5	19138887	19139082	-	1	ciRNA	-	ENSSSCT00000000295	MAP3K12	mRNA	chr5:19138881-19139082	mitogen-activated protein kinase kinase kinase 12 [Source:HGNC Symbol;Acc:HGNC:6851]	GO:0030426(growth cone);GO:0030424(axon);GO:0005886(plasma membrane);GO:0005829(cytosol);GO:0005737(cytoplasm);GO:2000672(negative regulation of motor neuron apoptotic process);GO:0046777(protein autophosphorylation);GO:0018107(peptidyl-threonine phosphorylation);GO:0018105(peptidyl-serine phosphorylation);GO:0016572(histone phosphorylation);GO:0016310(phosphorylation);GO:0007254(JNK cascade);GO:…	04010(MAPK signaling pathway)	ssc-miR-671-5p	m8	-0.187	72	164	-29.9
ciRNA118	chr5	69619846	69620144	+	1	ciRNA	-	ENSSSCT00000000809	ENSSSCG00000000745	mRNA	chr5:69619845-69620167	NA	GO:0005634(nucleus);GO:0006139(nucleobase-containing compound metabolic process);GO:0016818(hydrolase activity, acting on acid anhydrides, in phosphorus-containing anhydrides);GO:0016787(hydrolase activity);GO:0008026(ATP-dependent helicase activity);GO:0005524(ATP binding);GO:0004386(helicase activity);GO:0004003(ATP-dependent DNA helicase activity);GO:0003677(DNA binding);GO:0003676(nucleic aci…	NA	ssc-miR-532-3p	1a	-0.1535	59	148	-30.43
ciRNA119	chr5	81690837	81691534	+	1	ciRNA	-	ENSSSCT00000029955	PFKM	mRNA	chr5:81690836-81691571	phosphofructokinase, muscle [Source:HGNC Symbol;Acc:HGNC:8877]	GO:0097228(sperm principal piece);GO:0070062(extracellular exosome);GO:0016324(apical plasma membrane);GO:0005945(6-phosphofructokinase complex);GO:0005829(cytosol);GO:0005737(cytoplasm);GO:0093001(glycolysis from storage polysaccharide through glucose-1-phosphate);GO:0061621(canonical glycolysis);GO:0061615(glycolytic process through fructose-6-phosphate);GO:0051259(protein oligomerization);GO:0…	01200(Carbon metabolism);01230(Biosynthesis of amino acids);00010(Glycolysis / Gluconeogenesis);00030(Pentose phosphate pathway);00051(Fructose and mannose metabolism);00052(Galactose metabolism);03018(RNA degradation);04152(AMPK signaling pathway);05230(Central carbon metabolism in cancer)	ssc-miR-146a-5p	m8	-0.2115	77	162	-25.36
ciRNA119	chr5	81690837	81691534	+	1	ciRNA	-	ENSSSCT00000029955	PFKM	mRNA	chr5:81690836-81691571	phosphofructokinase, muscle [Source:HGNC Symbol;Acc:HGNC:8877]	GO:0097228(sperm principal piece);GO:0070062(extracellular exosome);GO:0016324(apical plasma membrane);GO:0005945(6-phosphofructokinase complex);GO:0005829(cytosol);GO:0005737(cytoplasm);GO:0093001(glycolysis from storage polysaccharide through glucose-1-phosphate);GO:0061621(canonical glycolysis);GO:0061615(glycolytic process through fructose-6-phosphate);GO:0051259(protein oligomerization);GO:0…	01200(Carbon metabolism);01230(Biosynthesis of amino acids);00010(Glycolysis / Gluconeogenesis);00030(Pentose phosphate pathway);00051(Fructose and mannose metabolism);00052(Galactose metabolism);03018(RNA degradation);04152(AMPK signaling pathway);05230(Central carbon metabolism in cancer)	ssc-miR-146b	m8	-0.165	59	149	-17.63
ciRNA119	chr5	81690837	81691534	+	1	ciRNA	-	ENSSSCT00000029955	PFKM	mRNA	chr5:81690836-81691571	phosphofructokinase, muscle [Source:HGNC Symbol;Acc:HGNC:8877]	GO:0097228(sperm principal piece);GO:0070062(extracellular exosome);GO:0016324(apical plasma membrane);GO:0005945(6-phosphofructokinase complex);GO:0005829(cytosol);GO:0005737(cytoplasm);GO:0093001(glycolysis from storage polysaccharide through glucose-1-phosphate);GO:0061621(canonical glycolysis);GO:0061615(glycolytic process through fructose-6-phosphate);GO:0051259(protein oligomerization);GO:0…	01200(Carbon metabolism);01230(Biosynthesis of amino acids);00010(Glycolysis / Gluconeogenesis);00030(Pentose phosphate pathway);00051(Fructose and mannose metabolism);00052(Galactose metabolism);03018(RNA degradation);04152(AMPK signaling pathway);05230(Central carbon metabolism in cancer)	ssc-miR-193a-5p	m8	-0.144	64	142	-18.57
ciRNA119	chr5	81690837	81691534	+	1	ciRNA	-	ENSSSCT00000029955	PFKM	mRNA	chr5:81690836-81691571	phosphofructokinase, muscle [Source:HGNC Symbol;Acc:HGNC:8877]	GO:0097228(sperm principal piece);GO:0070062(extracellular exosome);GO:0016324(apical plasma membrane);GO:0005945(6-phosphofructokinase complex);GO:0005829(cytosol);GO:0005737(cytoplasm);GO:0093001(glycolysis from storage polysaccharide through glucose-1-phosphate);GO:0061621(canonical glycolysis);GO:0061615(glycolytic process through fructose-6-phosphate);GO:0051259(protein oligomerization);GO:0…	01200(Carbon metabolism);01230(Biosynthesis of amino acids);00010(Glycolysis / Gluconeogenesis);00030(Pentose phosphate pathway);00051(Fructose and mannose metabolism);00052(Galactose metabolism);03018(RNA degradation);04152(AMPK signaling pathway);05230(Central carbon metabolism in cancer)	ssc-miR-196b-3p	8mer	-0.2072	69	159	-25.07
ciRNA119	chr5	81690837	81691534	+	1	ciRNA	-	ENSSSCT00000029955	PFKM	mRNA	chr5:81690836-81691571	phosphofructokinase, muscle [Source:HGNC Symbol;Acc:HGNC:8877]	GO:0097228(sperm principal piece);GO:0070062(extracellular exosome);GO:0016324(apical plasma membrane);GO:0005945(6-phosphofructokinase complex);GO:0005829(cytosol);GO:0005737(cytoplasm);GO:0093001(glycolysis from storage polysaccharide through glucose-1-phosphate);GO:0061621(canonical glycolysis);GO:0061615(glycolytic process through fructose-6-phosphate);GO:0051259(protein oligomerization);GO:0…	01200(Carbon metabolism);01230(Biosynthesis of amino acids);00010(Glycolysis / Gluconeogenesis);00030(Pentose phosphate pathway);00051(Fructose and mannose metabolism);00052(Galactose metabolism);03018(RNA degradation);04152(AMPK signaling pathway);05230(Central carbon metabolism in cancer)	ssc-miR-214	m8	-0.226	82	145	-16.28
ciRNA119	chr5	81690837	81691534	+	1	ciRNA	-	ENSSSCT00000029955	PFKM	mRNA	chr5:81690836-81691571	phosphofructokinase, muscle [Source:HGNC Symbol;Acc:HGNC:8877]	GO:0097228(sperm principal piece);GO:0070062(extracellular exosome);GO:0016324(apical plasma membrane);GO:0005945(6-phosphofructokinase complex);GO:0005829(cytosol);GO:0005737(cytoplasm);GO:0093001(glycolysis from storage polysaccharide through glucose-1-phosphate);GO:0061621(canonical glycolysis);GO:0061615(glycolytic process through fructose-6-phosphate);GO:0051259(protein oligomerization);GO:0…	01200(Carbon metabolism);01230(Biosynthesis of amino acids);00010(Glycolysis / Gluconeogenesis);00030(Pentose phosphate pathway);00051(Fructose and mannose metabolism);00052(Galactose metabolism);03018(RNA degradation);04152(AMPK signaling pathway);05230(Central carbon metabolism in cancer)	ssc-miR-2411	m8	-0.2115	79	153	-23.99
ciRNA119	chr5	81690837	81691534	+	1	ciRNA	-	ENSSSCT00000029955	PFKM	mRNA	chr5:81690836-81691571	phosphofructokinase, muscle [Source:HGNC Symbol;Acc:HGNC:8877]	GO:0097228(sperm principal piece);GO:0070062(extracellular exosome);GO:0016324(apical plasma membrane);GO:0005945(6-phosphofructokinase complex);GO:0005829(cytosol);GO:0005737(cytoplasm);GO:0093001(glycolysis from storage polysaccharide through glucose-1-phosphate);GO:0061621(canonical glycolysis);GO:0061615(glycolytic process through fructose-6-phosphate);GO:0051259(protein oligomerization);GO:0…	01200(Carbon metabolism);01230(Biosynthesis of amino acids);00010(Glycolysis / Gluconeogenesis);00030(Pentose phosphate pathway);00051(Fructose and mannose metabolism);00052(Galactose metabolism);03018(RNA degradation);04152(AMPK signaling pathway);05230(Central carbon metabolism in cancer)	ssc-miR-29b	m8	-0.248	80	152	-21.98
ciRNA119	chr5	81690837	81691534	+	1	ciRNA	-	ENSSSCT00000029955	PFKM	mRNA	chr5:81690836-81691571	phosphofructokinase, muscle [Source:HGNC Symbol;Acc:HGNC:8877]	GO:0097228(sperm principal piece);GO:0070062(extracellular exosome);GO:0016324(apical plasma membrane);GO:0005945(6-phosphofructokinase complex);GO:0005829(cytosol);GO:0005737(cytoplasm);GO:0093001(glycolysis from storage polysaccharide through glucose-1-phosphate);GO:0061621(canonical glycolysis);GO:0061615(glycolytic process through fructose-6-phosphate);GO:0051259(protein oligomerization);GO:0…	01200(Carbon metabolism);01230(Biosynthesis of amino acids);00010(Glycolysis / Gluconeogenesis);00030(Pentose phosphate pathway);00051(Fructose and mannose metabolism);00052(Galactose metabolism);03018(RNA degradation);04152(AMPK signaling pathway);05230(Central carbon metabolism in cancer)	ssc-miR-29c	m8	-0.248	80	147	-18.64
ciRNA119	chr5	81690837	81691534	+	1	ciRNA	-	ENSSSCT00000029955	PFKM	mRNA	chr5:81690836-81691571	phosphofructokinase, muscle [Source:HGNC Symbol;Acc:HGNC:8877]	GO:0097228(sperm principal piece);GO:0070062(extracellular exosome);GO:0016324(apical plasma membrane);GO:0005945(6-phosphofructokinase complex);GO:0005829(cytosol);GO:0005737(cytoplasm);GO:0093001(glycolysis from storage polysaccharide through glucose-1-phosphate);GO:0061621(canonical glycolysis);GO:0061615(glycolytic process through fructose-6-phosphate);GO:0051259(protein oligomerization);GO:0…	01200(Carbon metabolism);01230(Biosynthesis of amino acids);00010(Glycolysis / Gluconeogenesis);00030(Pentose phosphate pathway);00051(Fructose and mannose metabolism);00052(Galactose metabolism);03018(RNA degradation);04152(AMPK signaling pathway);05230(Central carbon metabolism in cancer)	ssc-miR-31	8mer	-0.28025	86	150	-15.42
ciRNA119	chr5	81690837	81691534	+	1	ciRNA	-	ENSSSCT00000029955	PFKM	mRNA	chr5:81690836-81691571	phosphofructokinase, muscle [Source:HGNC Symbol;Acc:HGNC:8877]	GO:0097228(sperm principal piece);GO:0070062(extracellular exosome);GO:0016324(apical plasma membrane);GO:0005945(6-phosphofructokinase complex);GO:0005829(cytosol);GO:0005737(cytoplasm);GO:0093001(glycolysis from storage polysaccharide through glucose-1-phosphate);GO:0061621(canonical glycolysis);GO:0061615(glycolytic process through fructose-6-phosphate);GO:0051259(protein oligomerization);GO:0…	01200(Carbon metabolism);01230(Biosynthesis of amino acids);00010(Glycolysis / Gluconeogenesis);00030(Pentose phosphate pathway);00051(Fructose and mannose metabolism);00052(Galactose metabolism);03018(RNA degradation);04152(AMPK signaling pathway);05230(Central carbon metabolism in cancer)	ssc-miR-320	m8	-0.165	52	153	-16.49
ciRNA119	chr5	81690837	81691534	+	1	ciRNA	-	ENSSSCT00000029955	PFKM	mRNA	chr5:81690836-81691571	phosphofructokinase, muscle [Source:HGNC Symbol;Acc:HGNC:8877]	GO:0097228(sperm principal piece);GO:0070062(extracellular exosome);GO:0016324(apical plasma membrane);GO:0005945(6-phosphofructokinase complex);GO:0005829(cytosol);GO:0005737(cytoplasm);GO:0093001(glycolysis from storage polysaccharide through glucose-1-phosphate);GO:0061621(canonical glycolysis);GO:0061615(glycolytic process through fructose-6-phosphate);GO:0051259(protein oligomerization);GO:0…	01200(Carbon metabolism);01230(Biosynthesis of amino acids);00010(Glycolysis / Gluconeogenesis);00030(Pentose phosphate pathway);00051(Fructose and mannose metabolism);00052(Galactose metabolism);03018(RNA degradation);04152(AMPK signaling pathway);05230(Central carbon metabolism in cancer)	ssc-miR-34a	m8	-0.1545	56	154	-22.55
ciRNA119	chr5	81690837	81691534	+	1	ciRNA	-	ENSSSCT00000029955	PFKM	mRNA	chr5:81690836-81691571	phosphofructokinase, muscle [Source:HGNC Symbol;Acc:HGNC:8877]	GO:0097228(sperm principal piece);GO:0070062(extracellular exosome);GO:0016324(apical plasma membrane);GO:0005945(6-phosphofructokinase complex);GO:0005829(cytosol);GO:0005737(cytoplasm);GO:0093001(glycolysis from storage polysaccharide through glucose-1-phosphate);GO:0061621(canonical glycolysis);GO:0061615(glycolytic process through fructose-6-phosphate);GO:0051259(protein oligomerization);GO:0…	01200(Carbon metabolism);01230(Biosynthesis of amino acids);00010(Glycolysis / Gluconeogenesis);00030(Pentose phosphate pathway);00051(Fructose and mannose metabolism);00052(Galactose metabolism);03018(RNA degradation);04152(AMPK signaling pathway);05230(Central carbon metabolism in cancer)	ssc-miR-34c	m8	-0.1545	57	154	-18.13
ciRNA119	chr5	81690837	81691534	+	1	ciRNA	-	ENSSSCT00000029955	PFKM	mRNA	chr5:81690836-81691571	phosphofructokinase, muscle [Source:HGNC Symbol;Acc:HGNC:8877]	GO:0097228(sperm principal piece);GO:0070062(extracellular exosome);GO:0016324(apical plasma membrane);GO:0005945(6-phosphofructokinase complex);GO:0005829(cytosol);GO:0005737(cytoplasm);GO:0093001(glycolysis from storage polysaccharide through glucose-1-phosphate);GO:0061621(canonical glycolysis);GO:0061615(glycolytic process through fructose-6-phosphate);GO:0051259(protein oligomerization);GO:0…	01200(Carbon metabolism);01230(Biosynthesis of amino acids);00010(Glycolysis / Gluconeogenesis);00030(Pentose phosphate pathway);00051(Fructose and mannose metabolism);00052(Galactose metabolism);03018(RNA degradation);04152(AMPK signaling pathway);05230(Central carbon metabolism in cancer)	ssc-miR-369	m8	-0.2425	78	153	-14.47
ciRNA119	chr5	81690837	81691534	+	1	ciRNA	-	ENSSSCT00000029955	PFKM	mRNA	chr5:81690836-81691571	phosphofructokinase, muscle [Source:HGNC Symbol;Acc:HGNC:8877]	GO:0097228(sperm principal piece);GO:0070062(extracellular exosome);GO:0016324(apical plasma membrane);GO:0005945(6-phosphofructokinase complex);GO:0005829(cytosol);GO:0005737(cytoplasm);GO:0093001(glycolysis from storage polysaccharide through glucose-1-phosphate);GO:0061621(canonical glycolysis);GO:0061615(glycolytic process through fructose-6-phosphate);GO:0051259(protein oligomerization);GO:0…	01200(Carbon metabolism);01230(Biosynthesis of amino acids);00010(Glycolysis / Gluconeogenesis);00030(Pentose phosphate pathway);00051(Fructose and mannose metabolism);00052(Galactose metabolism);03018(RNA degradation);04152(AMPK signaling pathway);05230(Central carbon metabolism in cancer)	ssc-miR-4331	m8	-0.198	77	156	-18.57
ciRNA119	chr5	81690837	81691534	+	1	ciRNA	-	ENSSSCT00000029955	PFKM	mRNA	chr5:81690836-81691571	phosphofructokinase, muscle [Source:HGNC Symbol;Acc:HGNC:8877]	GO:0097228(sperm principal piece);GO:0070062(extracellular exosome);GO:0016324(apical plasma membrane);GO:0005945(6-phosphofructokinase complex);GO:0005829(cytosol);GO:0005737(cytoplasm);GO:0093001(glycolysis from storage polysaccharide through glucose-1-phosphate);GO:0061621(canonical glycolysis);GO:0061615(glycolytic process through fructose-6-phosphate);GO:0051259(protein oligomerization);GO:0…	01200(Carbon metabolism);01230(Biosynthesis of amino acids);00010(Glycolysis / Gluconeogenesis);00030(Pentose phosphate pathway);00051(Fructose and mannose metabolism);00052(Galactose metabolism);03018(RNA degradation);04152(AMPK signaling pathway);05230(Central carbon metabolism in cancer)	ssc-miR-4339	m8	-0.1555	62	148	-22.99
ciRNA119	chr5	81690837	81691534	+	1	ciRNA	-	ENSSSCT00000029955	PFKM	mRNA	chr5:81690836-81691571	phosphofructokinase, muscle [Source:HGNC Symbol;Acc:HGNC:8877]	GO:0097228(sperm principal piece);GO:0070062(extracellular exosome);GO:0016324(apical plasma membrane);GO:0005945(6-phosphofructokinase complex);GO:0005829(cytosol);GO:0005737(cytoplasm);GO:0093001(glycolysis from storage polysaccharide through glucose-1-phosphate);GO:0061621(canonical glycolysis);GO:0061615(glycolytic process through fructose-6-phosphate);GO:0051259(protein oligomerization);GO:0…	01200(Carbon metabolism);01230(Biosynthesis of amino acids);00010(Glycolysis / Gluconeogenesis);00030(Pentose phosphate pathway);00051(Fructose and mannose metabolism);00052(Galactose metabolism);03018(RNA degradation);04152(AMPK signaling pathway);05230(Central carbon metabolism in cancer)	ssc-miR-455-3p	8mer	-0.2472	82	141	-17.77
ciRNA119	chr5	81690837	81691534	+	1	ciRNA	-	ENSSSCT00000029955	PFKM	mRNA	chr5:81690836-81691571	phosphofructokinase, muscle [Source:HGNC Symbol;Acc:HGNC:8877]	GO:0097228(sperm principal piece);GO:0070062(extracellular exosome);GO:0016324(apical plasma membrane);GO:0005945(6-phosphofructokinase complex);GO:0005829(cytosol);GO:0005737(cytoplasm);GO:0093001(glycolysis from storage polysaccharide through glucose-1-phosphate);GO:0061621(canonical glycolysis);GO:0061615(glycolytic process through fructose-6-phosphate);GO:0051259(protein oligomerization);GO:0…	01200(Carbon metabolism);01230(Biosynthesis of amino acids);00010(Glycolysis / Gluconeogenesis);00030(Pentose phosphate pathway);00051(Fructose and mannose metabolism);00052(Galactose metabolism);03018(RNA degradation);04152(AMPK signaling pathway);05230(Central carbon metabolism in cancer)	ssc-miR-484	m8	-0.126	62	148	-28.61
ciRNA119	chr5	81690837	81691534	+	1	ciRNA	-	ENSSSCT00000029955	PFKM	mRNA	chr5:81690836-81691571	phosphofructokinase, muscle [Source:HGNC Symbol;Acc:HGNC:8877]	GO:0097228(sperm principal piece);GO:0070062(extracellular exosome);GO:0016324(apical plasma membrane);GO:0005945(6-phosphofructokinase complex);GO:0005829(cytosol);GO:0005737(cytoplasm);GO:0093001(glycolysis from storage polysaccharide through glucose-1-phosphate);GO:0061621(canonical glycolysis);GO:0061615(glycolytic process through fructose-6-phosphate);GO:0051259(protein oligomerization);GO:0…	01200(Carbon metabolism);01230(Biosynthesis of amino acids);00010(Glycolysis / Gluconeogenesis);00030(Pentose phosphate pathway);00051(Fructose and mannose metabolism);00052(Galactose metabolism);03018(RNA degradation);04152(AMPK signaling pathway);05230(Central carbon metabolism in cancer)	ssc-miR-7135-5p	m8	-0.14	51	146	-19.04
ciRNA119	chr5	81690837	81691534	+	1	ciRNA	-	ENSSSCT00000029955	PFKM	mRNA	chr5:81690836-81691571	phosphofructokinase, muscle [Source:HGNC Symbol;Acc:HGNC:8877]	GO:0097228(sperm principal piece);GO:0070062(extracellular exosome);GO:0016324(apical plasma membrane);GO:0005945(6-phosphofructokinase complex);GO:0005829(cytosol);GO:0005737(cytoplasm);GO:0093001(glycolysis from storage polysaccharide through glucose-1-phosphate);GO:0061621(canonical glycolysis);GO:0061615(glycolytic process through fructose-6-phosphate);GO:0051259(protein oligomerization);GO:0…	01200(Carbon metabolism);01230(Biosynthesis of amino acids);00010(Glycolysis / Gluconeogenesis);00030(Pentose phosphate pathway);00051(Fructose and mannose metabolism);00052(Galactose metabolism);03018(RNA degradation);04152(AMPK signaling pathway);05230(Central carbon metabolism in cancer)	ssc-miR-7139-3p	m8	-0.192	74	159	-24.43
ciRNA119	chr5	81690837	81691534	+	1	ciRNA	-	ENSSSCT00000029955	PFKM	mRNA	chr5:81690836-81691571	phosphofructokinase, muscle [Source:HGNC Symbol;Acc:HGNC:8877]	GO:0097228(sperm principal piece);GO:0070062(extracellular exosome);GO:0016324(apical plasma membrane);GO:0005945(6-phosphofructokinase complex);GO:0005829(cytosol);GO:0005737(cytoplasm);GO:0093001(glycolysis from storage polysaccharide through glucose-1-phosphate);GO:0061621(canonical glycolysis);GO:0061615(glycolytic process through fructose-6-phosphate);GO:0051259(protein oligomerization);GO:0…	01200(Carbon metabolism);01230(Biosynthesis of amino acids);00010(Glycolysis / Gluconeogenesis);00030(Pentose phosphate pathway);00051(Fructose and mannose metabolism);00052(Galactose metabolism);03018(RNA degradation);04152(AMPK signaling pathway);05230(Central carbon metabolism in cancer)	ssc-miR-7144-5p	8mer	-0.3763	94	151	-24.31
ciRNA119	chr5	81690837	81691534	+	1	ciRNA	-	ENSSSCT00000029955	PFKM	mRNA	chr5:81690836-81691571	phosphofructokinase, muscle [Source:HGNC Symbol;Acc:HGNC:8877]	GO:0097228(sperm principal piece);GO:0070062(extracellular exosome);GO:0016324(apical plasma membrane);GO:0005945(6-phosphofructokinase complex);GO:0005829(cytosol);GO:0005737(cytoplasm);GO:0093001(glycolysis from storage polysaccharide through glucose-1-phosphate);GO:0061621(canonical glycolysis);GO:0061615(glycolytic process through fructose-6-phosphate);GO:0051259(protein oligomerization);GO:0…	01200(Carbon metabolism);01230(Biosynthesis of amino acids);00010(Glycolysis / Gluconeogenesis);00030(Pentose phosphate pathway);00051(Fructose and mannose metabolism);00052(Galactose metabolism);03018(RNA degradation);04152(AMPK signaling pathway);05230(Central carbon metabolism in cancer)	ssc-miR-9793-5p	m8	-0.243	88	142	-17.31
ciRNA119	chr5	81690837	81691534	+	1	ciRNA	-	ENSSSCT00000029955	PFKM	mRNA	chr5:81690836-81691571	phosphofructokinase, muscle [Source:HGNC Symbol;Acc:HGNC:8877]	GO:0097228(sperm principal piece);GO:0070062(extracellular exosome);GO:0016324(apical plasma membrane);GO:0005945(6-phosphofructokinase complex);GO:0005829(cytosol);GO:0005737(cytoplasm);GO:0093001(glycolysis from storage polysaccharide through glucose-1-phosphate);GO:0061621(canonical glycolysis);GO:0061615(glycolytic process through fructose-6-phosphate);GO:0051259(protein oligomerization);GO:0…	01200(Carbon metabolism);01230(Biosynthesis of amino acids);00010(Glycolysis / Gluconeogenesis);00030(Pentose phosphate pathway);00051(Fructose and mannose metabolism);00052(Galactose metabolism);03018(RNA degradation);04152(AMPK signaling pathway);05230(Central carbon metabolism in cancer)	ssc-miR-9835-3p	m8	-0.2085	83	154	-22.46
ciRNA119	chr5	81690837	81691534	+	1	ciRNA	-	ENSSSCT00000029955	PFKM	mRNA	chr5:81690836-81691571	phosphofructokinase, muscle [Source:HGNC Symbol;Acc:HGNC:8877]	GO:0097228(sperm principal piece);GO:0070062(extracellular exosome);GO:0016324(apical plasma membrane);GO:0005945(6-phosphofructokinase complex);GO:0005829(cytosol);GO:0005737(cytoplasm);GO:0093001(glycolysis from storage polysaccharide through glucose-1-phosphate);GO:0061621(canonical glycolysis);GO:0061615(glycolytic process through fructose-6-phosphate);GO:0051259(protein oligomerization);GO:0…	01200(Carbon metabolism);01230(Biosynthesis of amino acids);00010(Glycolysis / Gluconeogenesis);00030(Pentose phosphate pathway);00051(Fructose and mannose metabolism);00052(Galactose metabolism);03018(RNA degradation);04152(AMPK signaling pathway);05230(Central carbon metabolism in cancer)	ssc-miR-9842-5p	m8	-0.163	66	146	-19.43
ciRNA12	chr2	9251570	9251773	-	1	ciRNA	-	ENSSSCT00000014288	FADS1	mRNA	chr2:9251549-9251773	fatty acid desaturase 1 [Source:RefSeq peptide;Acc:NP_001106512]	GO:0016021(integral component of membrane);GO:0016020(membrane);GO:0055114(oxidation-reduction process);GO:0006629(lipid metabolic process);GO:0016491(oxidoreductase activity)	01212(Fatty acid metabolism);01040(Biosynthesis of unsaturated fatty acids)	ssc-miR-185	m8	-0.145	60	145	-15.68
ciRNA12	chr2	9251570	9251773	-	1	ciRNA	-	ENSSSCT00000014288	FADS1	mRNA	chr2:9251549-9251773	fatty acid desaturase 1 [Source:RefSeq peptide;Acc:NP_001106512]	GO:0016021(integral component of membrane);GO:0016020(membrane);GO:0055114(oxidation-reduction process);GO:0006629(lipid metabolic process);GO:0016491(oxidoreductase activity)	01212(Fatty acid metabolism);01040(Biosynthesis of unsaturated fatty acids)	ssc-miR-31	m8	-0.202	72	147	-17.63
ciRNA12	chr2	9251570	9251773	-	1	ciRNA	-	ENSSSCT00000014288	FADS1	mRNA	chr2:9251549-9251773	fatty acid desaturase 1 [Source:RefSeq peptide;Acc:NP_001106512]	GO:0016021(integral component of membrane);GO:0016020(membrane);GO:0055114(oxidation-reduction process);GO:0006629(lipid metabolic process);GO:0016491(oxidoreductase activity)	01212(Fatty acid metabolism);01040(Biosynthesis of unsaturated fatty acids)	ssc-miR-326	m8	-0.1295	51	140	-14.44
ciRNA12	chr2	9251570	9251773	-	1	ciRNA	-	ENSSSCT00000014288	FADS1	mRNA	chr2:9251549-9251773	fatty acid desaturase 1 [Source:RefSeq peptide;Acc:NP_001106512]	GO:0016021(integral component of membrane);GO:0016020(membrane);GO:0055114(oxidation-reduction process);GO:0006629(lipid metabolic process);GO:0016491(oxidoreductase activity)	01212(Fatty acid metabolism);01040(Biosynthesis of unsaturated fatty acids)	ssc-miR-4335	m8	-0.184	73	150	-22.56
ciRNA12	chr2	9251570	9251773	-	1	ciRNA	-	ENSSSCT00000014288	FADS1	mRNA	chr2:9251549-9251773	fatty acid desaturase 1 [Source:RefSeq peptide;Acc:NP_001106512]	GO:0016021(integral component of membrane);GO:0016020(membrane);GO:0055114(oxidation-reduction process);GO:0006629(lipid metabolic process);GO:0016491(oxidoreductase activity)	01212(Fatty acid metabolism);01040(Biosynthesis of unsaturated fatty acids)	ssc-miR-9807-5p	8mer	-0.3442	92	153	-17.09
ciRNA120	chr3	19641068	19641293	+	1	ciRNA	-	ENSSSCT00000008564	GTF3C1	mRNA	chr3:19641067-19641312	general transcription factor IIIC subunit 1 [Source:HGNC Symbol;Acc:HGNC:4664]	GO:0030529(intracellular ribonucleoprotein complex);GO:0016020(membrane);GO:0005730(nucleolus);GO:0005634(nucleus);GO:0000127(transcription factor TFIIIC complex);GO:0042791(5S class rRNA transcription from RNA polymerase III type 1 promoter);GO:0009304(tRNA transcription);GO:0006384(transcription initiation from RNA polymerase III promoter);GO:0006359(regulation of transcription from RNA polymer…	NA	ssc-miR-196b-3p	m8	-0.18	62	147	-18.81
ciRNA120	chr3	19641068	19641293	+	1	ciRNA	-	ENSSSCT00000008564	GTF3C1	mRNA	chr3:19641067-19641312	general transcription factor IIIC subunit 1 [Source:HGNC Symbol;Acc:HGNC:4664]	GO:0030529(intracellular ribonucleoprotein complex);GO:0016020(membrane);GO:0005730(nucleolus);GO:0005634(nucleus);GO:0000127(transcription factor TFIIIC complex);GO:0042791(5S class rRNA transcription from RNA polymerase III type 1 promoter);GO:0009304(tRNA transcription);GO:0006384(transcription initiation from RNA polymerase III promoter);GO:0006359(regulation of transcription from RNA polymer…	NA	ssc-miR-671-5p	m8	-0.2255	80	153	-34.66
ciRNA120	chr3	19641068	19641293	+	1	ciRNA	-	ENSSSCT00000008564	GTF3C1	mRNA	chr3:19641067-19641312	general transcription factor IIIC subunit 1 [Source:HGNC Symbol;Acc:HGNC:4664]	GO:0030529(intracellular ribonucleoprotein complex);GO:0016020(membrane);GO:0005730(nucleolus);GO:0005634(nucleus);GO:0000127(transcription factor TFIIIC complex);GO:0042791(5S class rRNA transcription from RNA polymerase III type 1 promoter);GO:0009304(tRNA transcription);GO:0006384(transcription initiation from RNA polymerase III promoter);GO:0006359(regulation of transcription from RNA polymer…	NA	ssc-miR-9829-5p	m8	-0.1325	50	162	-23.38
ciRNA121	chr3	19849723	19851270	-	1	ciRNA	-	ENSSSCT00000008566	IL4R	mRNA	chr3:19849701-19851270	interleukin-4 receptor subunit alpha precursor [Source:RefSeq peptide;Acc:NP_999505]	GO:0016021(integral component of membrane);GO:0016020(membrane);GO:0019221(cytokine-mediated signaling pathway);GO:0002532(production of molecular mediator involved in inflammatory response);GO:0004896(cytokine receptor activity);GO:0043235(receptor complex);GO:1901741(positive regulation of myoblast fusion);GO:0090197(positive regulation of chemokine secretion);GO:0045630(positive regulation of …	04630(Jak-STAT signaling pathway);04151(PI3K-Akt signaling pathway);04060(Cytokine-cytokine receptor interaction);04640(Hematopoietic cell lineage);05321(Inflammatiory bowel disease (IBD))	ssc-miR-127	m8	-0.168	76	147	-23.12
ciRNA121	chr3	19849723	19851270	-	1	ciRNA	-	ENSSSCT00000008566	IL4R	mRNA	chr3:19849701-19851270	interleukin-4 receptor subunit alpha precursor [Source:RefSeq peptide;Acc:NP_999505]	GO:0016021(integral component of membrane);GO:0016020(membrane);GO:0019221(cytokine-mediated signaling pathway);GO:0002532(production of molecular mediator involved in inflammatory response);GO:0004896(cytokine receptor activity);GO:0043235(receptor complex);GO:1901741(positive regulation of myoblast fusion);GO:0090197(positive regulation of chemokine secretion);GO:0045630(positive regulation of …	04630(Jak-STAT signaling pathway);04151(PI3K-Akt signaling pathway);04060(Cytokine-cytokine receptor interaction);04640(Hematopoietic cell lineage);05321(Inflammatiory bowel disease (IBD))	ssc-miR-1296-5p	1a	-0.1242	51	145	-21.57
ciRNA121	chr3	19849723	19851270	-	1	ciRNA	-	ENSSSCT00000008566	IL4R	mRNA	chr3:19849701-19851270	interleukin-4 receptor subunit alpha precursor [Source:RefSeq peptide;Acc:NP_999505]	GO:0016021(integral component of membrane);GO:0016020(membrane);GO:0019221(cytokine-mediated signaling pathway);GO:0002532(production of molecular mediator involved in inflammatory response);GO:0004896(cytokine receptor activity);GO:0043235(receptor complex);GO:1901741(positive regulation of myoblast fusion);GO:0090197(positive regulation of chemokine secretion);GO:0045630(positive regulation of …	04630(Jak-STAT signaling pathway);04151(PI3K-Akt signaling pathway);04060(Cytokine-cytokine receptor interaction);04640(Hematopoietic cell lineage);05321(Inflammatiory bowel disease (IBD))	ssc-miR-129a-5p	m8	-0.17	59	148	-20.58
ciRNA121	chr3	19849723	19851270	-	1	ciRNA	-	ENSSSCT00000008566	IL4R	mRNA	chr3:19849701-19851270	interleukin-4 receptor subunit alpha precursor [Source:RefSeq peptide;Acc:NP_999505]	GO:0016021(integral component of membrane);GO:0016020(membrane);GO:0019221(cytokine-mediated signaling pathway);GO:0002532(production of molecular mediator involved in inflammatory response);GO:0004896(cytokine receptor activity);GO:0043235(receptor complex);GO:1901741(positive regulation of myoblast fusion);GO:0090197(positive regulation of chemokine secretion);GO:0045630(positive regulation of …	04630(Jak-STAT signaling pathway);04151(PI3K-Akt signaling pathway);04060(Cytokine-cytokine receptor interaction);04640(Hematopoietic cell lineage);05321(Inflammatiory bowel disease (IBD))	ssc-miR-129b	m8	-0.17	59	148	-20.58
ciRNA121	chr3	19849723	19851270	-	1	ciRNA	-	ENSSSCT00000008566	IL4R	mRNA	chr3:19849701-19851270	interleukin-4 receptor subunit alpha precursor [Source:RefSeq peptide;Acc:NP_999505]	GO:0016021(integral component of membrane);GO:0016020(membrane);GO:0019221(cytokine-mediated signaling pathway);GO:0002532(production of molecular mediator involved in inflammatory response);GO:0004896(cytokine receptor activity);GO:0043235(receptor complex);GO:1901741(positive regulation of myoblast fusion);GO:0090197(positive regulation of chemokine secretion);GO:0045630(positive regulation of …	04630(Jak-STAT signaling pathway);04151(PI3K-Akt signaling pathway);04060(Cytokine-cytokine receptor interaction);04640(Hematopoietic cell lineage);05321(Inflammatiory bowel disease (IBD))	ssc-miR-140-3p	m8	-0.168	69	152	-19.59
ciRNA121	chr3	19849723	19851270	-	1	ciRNA	-	ENSSSCT00000008566	IL4R	mRNA	chr3:19849701-19851270	interleukin-4 receptor subunit alpha precursor [Source:RefSeq peptide;Acc:NP_999505]	GO:0016021(integral component of membrane);GO:0016020(membrane);GO:0019221(cytokine-mediated signaling pathway);GO:0002532(production of molecular mediator involved in inflammatory response);GO:0004896(cytokine receptor activity);GO:0043235(receptor complex);GO:1901741(positive regulation of myoblast fusion);GO:0090197(positive regulation of chemokine secretion);GO:0045630(positive regulation of …	04630(Jak-STAT signaling pathway);04151(PI3K-Akt signaling pathway);04060(Cytokine-cytokine receptor interaction);04640(Hematopoietic cell lineage);05321(Inflammatiory bowel disease (IBD))	ssc-miR-140-5p	m8	-0.15	53	141	-13.41
ciRNA121	chr3	19849723	19851270	-	1	ciRNA	-	ENSSSCT00000008566	IL4R	mRNA	chr3:19849701-19851270	interleukin-4 receptor subunit alpha precursor [Source:RefSeq peptide;Acc:NP_999505]	GO:0016021(integral component of membrane);GO:0016020(membrane);GO:0019221(cytokine-mediated signaling pathway);GO:0002532(production of molecular mediator involved in inflammatory response);GO:0004896(cytokine receptor activity);GO:0043235(receptor complex);GO:1901741(positive regulation of myoblast fusion);GO:0090197(positive regulation of chemokine secretion);GO:0045630(positive regulation of …	04630(Jak-STAT signaling pathway);04151(PI3K-Akt signaling pathway);04060(Cytokine-cytokine receptor interaction);04640(Hematopoietic cell lineage);05321(Inflammatiory bowel disease (IBD))	ssc-miR-146a-5p	m8	-0.1445	51	146	-18.68
ciRNA121	chr3	19849723	19851270	-	1	ciRNA	-	ENSSSCT00000008566	IL4R	mRNA	chr3:19849701-19851270	interleukin-4 receptor subunit alpha precursor [Source:RefSeq peptide;Acc:NP_999505]	GO:0016021(integral component of membrane);GO:0016020(membrane);GO:0019221(cytokine-mediated signaling pathway);GO:0002532(production of molecular mediator involved in inflammatory response);GO:0004896(cytokine receptor activity);GO:0043235(receptor complex);GO:1901741(positive regulation of myoblast fusion);GO:0090197(positive regulation of chemokine secretion);GO:0045630(positive regulation of …	04630(Jak-STAT signaling pathway);04151(PI3K-Akt signaling pathway);04060(Cytokine-cytokine receptor interaction);04640(Hematopoietic cell lineage);05321(Inflammatiory bowel disease (IBD))	ssc-miR-146b	m8	-0.1445	51	148	-19.3
ciRNA121	chr3	19849723	19851270	-	1	ciRNA	-	ENSSSCT00000008566	IL4R	mRNA	chr3:19849701-19851270	interleukin-4 receptor subunit alpha precursor [Source:RefSeq peptide;Acc:NP_999505]	GO:0016021(integral component of membrane);GO:0016020(membrane);GO:0019221(cytokine-mediated signaling pathway);GO:0002532(production of molecular mediator involved in inflammatory response);GO:0004896(cytokine receptor activity);GO:0043235(receptor complex);GO:1901741(positive regulation of myoblast fusion);GO:0090197(positive regulation of chemokine secretion);GO:0045630(positive regulation of …	04630(Jak-STAT signaling pathway);04151(PI3K-Akt signaling pathway);04060(Cytokine-cytokine receptor interaction);04640(Hematopoietic cell lineage);05321(Inflammatiory bowel disease (IBD))	ssc-miR-150	m8	-0.1605	65	148	-20.47
ciRNA121	chr3	19849723	19851270	-	1	ciRNA	-	ENSSSCT00000008566	IL4R	mRNA	chr3:19849701-19851270	interleukin-4 receptor subunit alpha precursor [Source:RefSeq peptide;Acc:NP_999505]	GO:0016021(integral component of membrane);GO:0016020(membrane);GO:0019221(cytokine-mediated signaling pathway);GO:0002532(production of molecular mediator involved in inflammatory response);GO:0004896(cytokine receptor activity);GO:0043235(receptor complex);GO:1901741(positive regulation of myoblast fusion);GO:0090197(positive regulation of chemokine secretion);GO:0045630(positive regulation of …	04630(Jak-STAT signaling pathway);04151(PI3K-Akt signaling pathway);04060(Cytokine-cytokine receptor interaction);04640(Hematopoietic cell lineage);05321(Inflammatiory bowel disease (IBD))	ssc-miR-217	m8	-0.1865	65	157	-25.47
ciRNA121	chr3	19849723	19851270	-	1	ciRNA	-	ENSSSCT00000008566	IL4R	mRNA	chr3:19849701-19851270	interleukin-4 receptor subunit alpha precursor [Source:RefSeq peptide;Acc:NP_999505]	GO:0016021(integral component of membrane);GO:0016020(membrane);GO:0019221(cytokine-mediated signaling pathway);GO:0002532(production of molecular mediator involved in inflammatory response);GO:0004896(cytokine receptor activity);GO:0043235(receptor complex);GO:1901741(positive regulation of myoblast fusion);GO:0090197(positive regulation of chemokine secretion);GO:0045630(positive regulation of …	04630(Jak-STAT signaling pathway);04151(PI3K-Akt signaling pathway);04060(Cytokine-cytokine receptor interaction);04640(Hematopoietic cell lineage);05321(Inflammatiory bowel disease (IBD))	ssc-miR-221-5p	m8	-0.1355	54	156	-21.21
ciRNA121	chr3	19849723	19851270	-	1	ciRNA	-	ENSSSCT00000008566	IL4R	mRNA	chr3:19849701-19851270	interleukin-4 receptor subunit alpha precursor [Source:RefSeq peptide;Acc:NP_999505]	GO:0016021(integral component of membrane);GO:0016020(membrane);GO:0019221(cytokine-mediated signaling pathway);GO:0002532(production of molecular mediator involved in inflammatory response);GO:0004896(cytokine receptor activity);GO:0043235(receptor complex);GO:1901741(positive regulation of myoblast fusion);GO:0090197(positive regulation of chemokine secretion);GO:0045630(positive regulation of …	04630(Jak-STAT signaling pathway);04151(PI3K-Akt signaling pathway);04060(Cytokine-cytokine receptor interaction);04640(Hematopoietic cell lineage);05321(Inflammatiory bowel disease (IBD))	ssc-miR-2320-5p	8mer	-0.13815	51	150	-26.88
ciRNA121	chr3	19849723	19851270	-	1	ciRNA	-	ENSSSCT00000008566	IL4R	mRNA	chr3:19849701-19851270	interleukin-4 receptor subunit alpha precursor [Source:RefSeq peptide;Acc:NP_999505]	GO:0016021(integral component of membrane);GO:0016020(membrane);GO:0019221(cytokine-mediated signaling pathway);GO:0002532(production of molecular mediator involved in inflammatory response);GO:0004896(cytokine receptor activity);GO:0043235(receptor complex);GO:1901741(positive regulation of myoblast fusion);GO:0090197(positive regulation of chemokine secretion);GO:0045630(positive regulation of …	04630(Jak-STAT signaling pathway);04151(PI3K-Akt signaling pathway);04060(Cytokine-cytokine receptor interaction);04640(Hematopoietic cell lineage);05321(Inflammatiory bowel disease (IBD))	ssc-miR-24-3p	8mer	-0.38915	97	147	-24.89
ciRNA121	chr3	19849723	19851270	-	1	ciRNA	-	ENSSSCT00000008566	IL4R	mRNA	chr3:19849701-19851270	interleukin-4 receptor subunit alpha precursor [Source:RefSeq peptide;Acc:NP_999505]	GO:0016021(integral component of membrane);GO:0016020(membrane);GO:0019221(cytokine-mediated signaling pathway);GO:0002532(production of molecular mediator involved in inflammatory response);GO:0004896(cytokine receptor activity);GO:0043235(receptor complex);GO:1901741(positive regulation of myoblast fusion);GO:0090197(positive regulation of chemokine secretion);GO:0045630(positive regulation of …	04630(Jak-STAT signaling pathway);04151(PI3K-Akt signaling pathway);04060(Cytokine-cytokine receptor interaction);04640(Hematopoietic cell lineage);05321(Inflammatiory bowel disease (IBD))	ssc-miR-2411	m8	-0.188	72	142	-17.69
ciRNA121	chr3	19849723	19851270	-	1	ciRNA	-	ENSSSCT00000008566	IL4R	mRNA	chr3:19849701-19851270	interleukin-4 receptor subunit alpha precursor [Source:RefSeq peptide;Acc:NP_999505]	GO:0016021(integral component of membrane);GO:0016020(membrane);GO:0019221(cytokine-mediated signaling pathway);GO:0002532(production of molecular mediator involved in inflammatory response);GO:0004896(cytokine receptor activity);GO:0043235(receptor complex);GO:1901741(positive regulation of myoblast fusion);GO:0090197(positive regulation of chemokine secretion);GO:0045630(positive regulation of …	04630(Jak-STAT signaling pathway);04151(PI3K-Akt signaling pathway);04060(Cytokine-cytokine receptor interaction);04640(Hematopoietic cell lineage);05321(Inflammatiory bowel disease (IBD))	ssc-miR-331-3p	m8	-0.1405	58	148	-25.91
ciRNA121	chr3	19849723	19851270	-	1	ciRNA	-	ENSSSCT00000008566	IL4R	mRNA	chr3:19849701-19851270	interleukin-4 receptor subunit alpha precursor [Source:RefSeq peptide;Acc:NP_999505]	GO:0016021(integral component of membrane);GO:0016020(membrane);GO:0019221(cytokine-mediated signaling pathway);GO:0002532(production of molecular mediator involved in inflammatory response);GO:0004896(cytokine receptor activity);GO:0043235(receptor complex);GO:1901741(positive regulation of myoblast fusion);GO:0090197(positive regulation of chemokine secretion);GO:0045630(positive regulation of …	04630(Jak-STAT signaling pathway);04151(PI3K-Akt signaling pathway);04060(Cytokine-cytokine receptor interaction);04640(Hematopoietic cell lineage);05321(Inflammatiory bowel disease (IBD))	ssc-miR-34a	m8	-0.2	72	172	-26.26
ciRNA121	chr3	19849723	19851270	-	1	ciRNA	-	ENSSSCT00000008566	IL4R	mRNA	chr3:19849701-19851270	interleukin-4 receptor subunit alpha precursor [Source:RefSeq peptide;Acc:NP_999505]	GO:0016021(integral component of membrane);GO:0016020(membrane);GO:0019221(cytokine-mediated signaling pathway);GO:0002532(production of molecular mediator involved in inflammatory response);GO:0004896(cytokine receptor activity);GO:0043235(receptor complex);GO:1901741(positive regulation of myoblast fusion);GO:0090197(positive regulation of chemokine secretion);GO:0045630(positive regulation of …	04630(Jak-STAT signaling pathway);04151(PI3K-Akt signaling pathway);04060(Cytokine-cytokine receptor interaction);04640(Hematopoietic cell lineage);05321(Inflammatiory bowel disease (IBD))	ssc-miR-34c	m8	-0.2	72	159	-22.17
ciRNA121	chr3	19849723	19851270	-	1	ciRNA	-	ENSSSCT00000008566	IL4R	mRNA	chr3:19849701-19851270	interleukin-4 receptor subunit alpha precursor [Source:RefSeq peptide;Acc:NP_999505]	GO:0016021(integral component of membrane);GO:0016020(membrane);GO:0019221(cytokine-mediated signaling pathway);GO:0002532(production of molecular mediator involved in inflammatory response);GO:0004896(cytokine receptor activity);GO:0043235(receptor complex);GO:1901741(positive regulation of myoblast fusion);GO:0090197(positive regulation of chemokine secretion);GO:0045630(positive regulation of …	04630(Jak-STAT signaling pathway);04151(PI3K-Akt signaling pathway);04060(Cytokine-cytokine receptor interaction);04640(Hematopoietic cell lineage);05321(Inflammatiory bowel disease (IBD))	ssc-miR-361-3p	8mer	-0.24125	83	154	-21.02
ciRNA121	chr3	19849723	19851270	-	1	ciRNA	-	ENSSSCT00000008566	IL4R	mRNA	chr3:19849701-19851270	interleukin-4 receptor subunit alpha precursor [Source:RefSeq peptide;Acc:NP_999505]	GO:0016021(integral component of membrane);GO:0016020(membrane);GO:0019221(cytokine-mediated signaling pathway);GO:0002532(production of molecular mediator involved in inflammatory response);GO:0004896(cytokine receptor activity);GO:0043235(receptor complex);GO:1901741(positive regulation of myoblast fusion);GO:0090197(positive regulation of chemokine secretion);GO:0045630(positive regulation of …	04630(Jak-STAT signaling pathway);04151(PI3K-Akt signaling pathway);04060(Cytokine-cytokine receptor interaction);04640(Hematopoietic cell lineage);05321(Inflammatiory bowel disease (IBD))	ssc-miR-383	8mer	-0.2242	82	162	-26.41
ciRNA121	chr3	19849723	19851270	-	1	ciRNA	-	ENSSSCT00000008566	IL4R	mRNA	chr3:19849701-19851270	interleukin-4 receptor subunit alpha precursor [Source:RefSeq peptide;Acc:NP_999505]	GO:0016021(integral component of membrane);GO:0016020(membrane);GO:0019221(cytokine-mediated signaling pathway);GO:0002532(production of molecular mediator involved in inflammatory response);GO:0004896(cytokine receptor activity);GO:0043235(receptor complex);GO:1901741(positive regulation of myoblast fusion);GO:0090197(positive regulation of chemokine secretion);GO:0045630(positive regulation of …	04630(Jak-STAT signaling pathway);04151(PI3K-Akt signaling pathway);04060(Cytokine-cytokine receptor interaction);04640(Hematopoietic cell lineage);05321(Inflammatiory bowel disease (IBD))	ssc-miR-425-5p	m8	-0.2565	87	146	-16.97
ciRNA121	chr3	19849723	19851270	-	1	ciRNA	-	ENSSSCT00000008566	IL4R	mRNA	chr3:19849701-19851270	interleukin-4 receptor subunit alpha precursor [Source:RefSeq peptide;Acc:NP_999505]	GO:0016021(integral component of membrane);GO:0016020(membrane);GO:0019221(cytokine-mediated signaling pathway);GO:0002532(production of molecular mediator involved in inflammatory response);GO:0004896(cytokine receptor activity);GO:0043235(receptor complex);GO:1901741(positive regulation of myoblast fusion);GO:0090197(positive regulation of chemokine secretion);GO:0045630(positive regulation of …	04630(Jak-STAT signaling pathway);04151(PI3K-Akt signaling pathway);04060(Cytokine-cytokine receptor interaction);04640(Hematopoietic cell lineage);05321(Inflammatiory bowel disease (IBD))	ssc-miR-615	8mer	-0.2783	86	147	-21.44
ciRNA121	chr3	19849723	19851270	-	1	ciRNA	-	ENSSSCT00000008566	IL4R	mRNA	chr3:19849701-19851270	interleukin-4 receptor subunit alpha precursor [Source:RefSeq peptide;Acc:NP_999505]	GO:0016021(integral component of membrane);GO:0016020(membrane);GO:0019221(cytokine-mediated signaling pathway);GO:0002532(production of molecular mediator involved in inflammatory response);GO:0004896(cytokine receptor activity);GO:0043235(receptor complex);GO:1901741(positive regulation of myoblast fusion);GO:0090197(positive regulation of chemokine secretion);GO:0045630(positive regulation of …	04630(Jak-STAT signaling pathway);04151(PI3K-Akt signaling pathway);04060(Cytokine-cytokine receptor interaction);04640(Hematopoietic cell lineage);05321(Inflammatiory bowel disease (IBD))	ssc-miR-7136-3p	m8	-0.1795	72	155	-22.01
ciRNA121	chr3	19849723	19851270	-	1	ciRNA	-	ENSSSCT00000008566	IL4R	mRNA	chr3:19849701-19851270	interleukin-4 receptor subunit alpha precursor [Source:RefSeq peptide;Acc:NP_999505]	GO:0016021(integral component of membrane);GO:0016020(membrane);GO:0019221(cytokine-mediated signaling pathway);GO:0002532(production of molecular mediator involved in inflammatory response);GO:0004896(cytokine receptor activity);GO:0043235(receptor complex);GO:1901741(positive regulation of myoblast fusion);GO:0090197(positive regulation of chemokine secretion);GO:0045630(positive regulation of …	04630(Jak-STAT signaling pathway);04151(PI3K-Akt signaling pathway);04060(Cytokine-cytokine receptor interaction);04640(Hematopoietic cell lineage);05321(Inflammatiory bowel disease (IBD))	ssc-miR-7137-3p	m8	-0.132	50	155	-22.32
ciRNA121	chr3	19849723	19851270	-	1	ciRNA	-	ENSSSCT00000008566	IL4R	mRNA	chr3:19849701-19851270	interleukin-4 receptor subunit alpha precursor [Source:RefSeq peptide;Acc:NP_999505]	GO:0016021(integral component of membrane);GO:0016020(membrane);GO:0019221(cytokine-mediated signaling pathway);GO:0002532(production of molecular mediator involved in inflammatory response);GO:0004896(cytokine receptor activity);GO:0043235(receptor complex);GO:1901741(positive regulation of myoblast fusion);GO:0090197(positive regulation of chemokine secretion);GO:0045630(positive regulation of …	04630(Jak-STAT signaling pathway);04151(PI3K-Akt signaling pathway);04060(Cytokine-cytokine receptor interaction);04640(Hematopoietic cell lineage);05321(Inflammatiory bowel disease (IBD))	ssc-miR-7139-3p	m8	-0.1925	75	145	-16.19
ciRNA121	chr3	19849723	19851270	-	1	ciRNA	-	ENSSSCT00000008566	IL4R	mRNA	chr3:19849701-19851270	interleukin-4 receptor subunit alpha precursor [Source:RefSeq peptide;Acc:NP_999505]	GO:0016021(integral component of membrane);GO:0016020(membrane);GO:0019221(cytokine-mediated signaling pathway);GO:0002532(production of molecular mediator involved in inflammatory response);GO:0004896(cytokine receptor activity);GO:0043235(receptor complex);GO:1901741(positive regulation of myoblast fusion);GO:0090197(positive regulation of chemokine secretion);GO:0045630(positive regulation of …	04630(Jak-STAT signaling pathway);04151(PI3K-Akt signaling pathway);04060(Cytokine-cytokine receptor interaction);04640(Hematopoietic cell lineage);05321(Inflammatiory bowel disease (IBD))	ssc-miR-9825-5p	8mer	-0.27125	84	153	-19.03
ciRNA121	chr3	19849723	19851270	-	1	ciRNA	-	ENSSSCT00000008566	IL4R	mRNA	chr3:19849701-19851270	interleukin-4 receptor subunit alpha precursor [Source:RefSeq peptide;Acc:NP_999505]	GO:0016021(integral component of membrane);GO:0016020(membrane);GO:0019221(cytokine-mediated signaling pathway);GO:0002532(production of molecular mediator involved in inflammatory response);GO:0004896(cytokine receptor activity);GO:0043235(receptor complex);GO:1901741(positive regulation of myoblast fusion);GO:0090197(positive regulation of chemokine secretion);GO:0045630(positive regulation of …	04630(Jak-STAT signaling pathway);04151(PI3K-Akt signaling pathway);04060(Cytokine-cytokine receptor interaction);04640(Hematopoietic cell lineage);05321(Inflammatiory bowel disease (IBD))	ssc-miR-9833-5p	m8	-0.1455	50	157	-14.12
ciRNA121	chr3	19849723	19851270	-	1	ciRNA	-	ENSSSCT00000008566	IL4R	mRNA	chr3:19849701-19851270	interleukin-4 receptor subunit alpha precursor [Source:RefSeq peptide;Acc:NP_999505]	GO:0016021(integral component of membrane);GO:0016020(membrane);GO:0019221(cytokine-mediated signaling pathway);GO:0002532(production of molecular mediator involved in inflammatory response);GO:0004896(cytokine receptor activity);GO:0043235(receptor complex);GO:1901741(positive regulation of myoblast fusion);GO:0090197(positive regulation of chemokine secretion);GO:0045630(positive regulation of …	04630(Jak-STAT signaling pathway);04151(PI3K-Akt signaling pathway);04060(Cytokine-cytokine receptor interaction);04640(Hematopoietic cell lineage);05321(Inflammatiory bowel disease (IBD))	ssc-miR-9845-5p	m8	-0.164	64	148	-19.84
ciRNA121	chr3	19849723	19851270	-	1	ciRNA	-	ENSSSCT00000008566	IL4R	mRNA	chr3:19849701-19851270	interleukin-4 receptor subunit alpha precursor [Source:RefSeq peptide;Acc:NP_999505]	GO:0016021(integral component of membrane);GO:0016020(membrane);GO:0019221(cytokine-mediated signaling pathway);GO:0002532(production of molecular mediator involved in inflammatory response);GO:0004896(cytokine receptor activity);GO:0043235(receptor complex);GO:1901741(positive regulation of myoblast fusion);GO:0090197(positive regulation of chemokine secretion);GO:0045630(positive regulation of …	04630(Jak-STAT signaling pathway);04151(PI3K-Akt signaling pathway);04060(Cytokine-cytokine receptor interaction);04640(Hematopoietic cell lineage);05321(Inflammatiory bowel disease (IBD))	ssc-miR-9847-3p	8mer	-0.17215	69	141	-18.85
ciRNA121	chr3	19849723	19851270	-	1	ciRNA	-	ENSSSCT00000008566	IL4R	mRNA	chr3:19849701-19851270	interleukin-4 receptor subunit alpha precursor [Source:RefSeq peptide;Acc:NP_999505]	GO:0016021(integral component of membrane);GO:0016020(membrane);GO:0019221(cytokine-mediated signaling pathway);GO:0002532(production of molecular mediator involved in inflammatory response);GO:0004896(cytokine receptor activity);GO:0043235(receptor complex);GO:1901741(positive regulation of myoblast fusion);GO:0090197(positive regulation of chemokine secretion);GO:0045630(positive regulation of …	04630(Jak-STAT signaling pathway);04151(PI3K-Akt signaling pathway);04060(Cytokine-cytokine receptor interaction);04640(Hematopoietic cell lineage);05321(Inflammatiory bowel disease (IBD))	ssc-miR-9852-3p	m8	-0.122	65	148	-21.36
ciRNA121	chr3	19849723	19851270	-	1	ciRNA	-	ENSSSCT00000008566	IL4R	mRNA	chr3:19849701-19851270	interleukin-4 receptor subunit alpha precursor [Source:RefSeq peptide;Acc:NP_999505]	GO:0016021(integral component of membrane);GO:0016020(membrane);GO:0019221(cytokine-mediated signaling pathway);GO:0002532(production of molecular mediator involved in inflammatory response);GO:0004896(cytokine receptor activity);GO:0043235(receptor complex);GO:1901741(positive regulation of myoblast fusion);GO:0090197(positive regulation of chemokine secretion);GO:0045630(positive regulation of …	04630(Jak-STAT signaling pathway);04151(PI3K-Akt signaling pathway);04060(Cytokine-cytokine receptor interaction);04640(Hematopoietic cell lineage);05321(Inflammatiory bowel disease (IBD))	ssc-miR-9854-5p	1a	-0.1492	74	148	-16.49
ciRNA122	chr9	49624390	49624582	+	1	ciRNA	-	ENSSSCT00000016440	SIDT2	mRNA	chr9:49624389-49624602	SID1 transmembrane family member 2 [Source:HGNC Symbol;Acc:HGNC:24272]	GO:0016021(integral component of membrane);GO:0016020(membrane);GO:0005765(lysosomal membrane);GO:0061178(regulation of insulin secretion involved in cellular response to glucose stimulus);GO:0044342(type B pancreatic cell proliferation);GO:0042593(glucose homeostasis);GO:0033227(dsRNA transport);GO:0009749(response to glucose);GO:0003323(type B pancreatic cell development);GO:0000902(cell morpho…	NA	ssc-miR-30b-3p	8mer	-0.1982	76	147	-16.2
ciRNA122	chr9	49624390	49624582	+	1	ciRNA	-	ENSSSCT00000016440	SIDT2	mRNA	chr9:49624389-49624602	SID1 transmembrane family member 2 [Source:HGNC Symbol;Acc:HGNC:24272]	GO:0016021(integral component of membrane);GO:0016020(membrane);GO:0005765(lysosomal membrane);GO:0061178(regulation of insulin secretion involved in cellular response to glucose stimulus);GO:0044342(type B pancreatic cell proliferation);GO:0042593(glucose homeostasis);GO:0033227(dsRNA transport);GO:0009749(response to glucose);GO:0003323(type B pancreatic cell development);GO:0000902(cell morpho…	NA	ssc-miR-30c-1-3p	8mer	-0.2633	89	153	-21.46
ciRNA122	chr9	49624390	49624582	+	1	ciRNA	-	ENSSSCT00000016440	SIDT2	mRNA	chr9:49624389-49624602	SID1 transmembrane family member 2 [Source:HGNC Symbol;Acc:HGNC:24272]	GO:0016021(integral component of membrane);GO:0016020(membrane);GO:0005765(lysosomal membrane);GO:0061178(regulation of insulin secretion involved in cellular response to glucose stimulus);GO:0044342(type B pancreatic cell proliferation);GO:0042593(glucose homeostasis);GO:0033227(dsRNA transport);GO:0009749(response to glucose);GO:0003323(type B pancreatic cell development);GO:0000902(cell morpho…	NA	ssc-miR-30c-3p	8mer	-0.2633	89	149	-17.63
ciRNA122	chr9	49624390	49624582	+	1	ciRNA	-	ENSSSCT00000016440	SIDT2	mRNA	chr9:49624389-49624602	SID1 transmembrane family member 2 [Source:HGNC Symbol;Acc:HGNC:24272]	GO:0016021(integral component of membrane);GO:0016020(membrane);GO:0005765(lysosomal membrane);GO:0061178(regulation of insulin secretion involved in cellular response to glucose stimulus);GO:0044342(type B pancreatic cell proliferation);GO:0042593(glucose homeostasis);GO:0033227(dsRNA transport);GO:0009749(response to glucose);GO:0003323(type B pancreatic cell development);GO:0000902(cell morpho…	NA	ssc-miR-9829-5p	8mer	-0.2052	78	146	-18.25
ciRNA123	chr9	50267294	50267828	-	1	ciRNA	-	ENSSSCT00000016449	FXYD6	mRNA	chr9:50267268-50267828	FXYD domain containing ion transport regulator 6 [Source:HGNC Symbol;Acc:HGNC:4030]	GO:0016021(integral component of membrane);GO:0016020(membrane);GO:0005887(integral component of plasma membrane);GO:0005886(plasma membrane);GO:2000649(regulation of sodium ion transmembrane transporter activity);GO:0034220(ion transmembrane transport);GO:0006811(ion transport);GO:0017080(sodium channel regulator activity);GO:0005216(ion channel activity)	NA	ssc-miR-1343	m8	-0.1545	67	156	-27.41
ciRNA123	chr9	50267294	50267828	-	1	ciRNA	-	ENSSSCT00000016449	FXYD6	mRNA	chr9:50267268-50267828	FXYD domain containing ion transport regulator 6 [Source:HGNC Symbol;Acc:HGNC:4030]	GO:0016021(integral component of membrane);GO:0016020(membrane);GO:0005887(integral component of plasma membrane);GO:0005886(plasma membrane);GO:2000649(regulation of sodium ion transmembrane transporter activity);GO:0034220(ion transmembrane transport);GO:0006811(ion transport);GO:0017080(sodium channel regulator activity);GO:0005216(ion channel activity)	NA	ssc-miR-148a-3p	m8	-0.177	68	147	-12.11
ciRNA123	chr9	50267294	50267828	-	1	ciRNA	-	ENSSSCT00000016449	FXYD6	mRNA	chr9:50267268-50267828	FXYD domain containing ion transport regulator 6 [Source:HGNC Symbol;Acc:HGNC:4030]	GO:0016021(integral component of membrane);GO:0016020(membrane);GO:0005887(integral component of plasma membrane);GO:0005886(plasma membrane);GO:2000649(regulation of sodium ion transmembrane transporter activity);GO:0034220(ion transmembrane transport);GO:0006811(ion transport);GO:0017080(sodium channel regulator activity);GO:0005216(ion channel activity)	NA	ssc-miR-148b-3p	m8	-0.177	69	147	-13.4
ciRNA123	chr9	50267294	50267828	-	1	ciRNA	-	ENSSSCT00000016449	FXYD6	mRNA	chr9:50267268-50267828	FXYD domain containing ion transport regulator 6 [Source:HGNC Symbol;Acc:HGNC:4030]	GO:0016021(integral component of membrane);GO:0016020(membrane);GO:0005887(integral component of plasma membrane);GO:0005886(plasma membrane);GO:2000649(regulation of sodium ion transmembrane transporter activity);GO:0034220(ion transmembrane transport);GO:0006811(ion transport);GO:0017080(sodium channel regulator activity);GO:0005216(ion channel activity)	NA	ssc-miR-152	m8	-0.177	68	147	-21.45
ciRNA123	chr9	50267294	50267828	-	1	ciRNA	-	ENSSSCT00000016449	FXYD6	mRNA	chr9:50267268-50267828	FXYD domain containing ion transport regulator 6 [Source:HGNC Symbol;Acc:HGNC:4030]	GO:0016021(integral component of membrane);GO:0016020(membrane);GO:0005887(integral component of plasma membrane);GO:0005886(plasma membrane);GO:2000649(regulation of sodium ion transmembrane transporter activity);GO:0034220(ion transmembrane transport);GO:0006811(ion transport);GO:0017080(sodium channel regulator activity);GO:0005216(ion channel activity)	NA	ssc-miR-383	m8	-0.146	57	155	-22.04
ciRNA123	chr9	50267294	50267828	-	1	ciRNA	-	ENSSSCT00000016449	FXYD6	mRNA	chr9:50267268-50267828	FXYD domain containing ion transport regulator 6 [Source:HGNC Symbol;Acc:HGNC:4030]	GO:0016021(integral component of membrane);GO:0016020(membrane);GO:0005887(integral component of plasma membrane);GO:0005886(plasma membrane);GO:2000649(regulation of sodium ion transmembrane transporter activity);GO:0034220(ion transmembrane transport);GO:0006811(ion transport);GO:0017080(sodium channel regulator activity);GO:0005216(ion channel activity)	NA	ssc-miR-432-5p	m8	-0.1545	54	149	-18.96
ciRNA123	chr9	50267294	50267828	-	1	ciRNA	-	ENSSSCT00000016449	FXYD6	mRNA	chr9:50267268-50267828	FXYD domain containing ion transport regulator 6 [Source:HGNC Symbol;Acc:HGNC:4030]	GO:0016021(integral component of membrane);GO:0016020(membrane);GO:0005887(integral component of plasma membrane);GO:0005886(plasma membrane);GO:2000649(regulation of sodium ion transmembrane transporter activity);GO:0034220(ion transmembrane transport);GO:0006811(ion transport);GO:0017080(sodium channel regulator activity);GO:0005216(ion channel activity)	NA	ssc-miR-4331	8mer	-0.2732	88	162	-28.9
ciRNA123	chr9	50267294	50267828	-	1	ciRNA	-	ENSSSCT00000016449	FXYD6	mRNA	chr9:50267268-50267828	FXYD domain containing ion transport regulator 6 [Source:HGNC Symbol;Acc:HGNC:4030]	GO:0016021(integral component of membrane);GO:0016020(membrane);GO:0005887(integral component of plasma membrane);GO:0005886(plasma membrane);GO:2000649(regulation of sodium ion transmembrane transporter activity);GO:0034220(ion transmembrane transport);GO:0006811(ion transport);GO:0017080(sodium channel regulator activity);GO:0005216(ion channel activity)	NA	ssc-miR-532-3p	8mer	-0.2031	76	144	-18.8
ciRNA123	chr9	50267294	50267828	-	1	ciRNA	-	ENSSSCT00000016449	FXYD6	mRNA	chr9:50267268-50267828	FXYD domain containing ion transport regulator 6 [Source:HGNC Symbol;Acc:HGNC:4030]	GO:0016021(integral component of membrane);GO:0016020(membrane);GO:0005887(integral component of plasma membrane);GO:0005886(plasma membrane);GO:2000649(regulation of sodium ion transmembrane transporter activity);GO:0034220(ion transmembrane transport);GO:0006811(ion transport);GO:0017080(sodium channel regulator activity);GO:0005216(ion channel activity)	NA	ssc-miR-652	m8	-0.17	71	159	-23.78
ciRNA123	chr9	50267294	50267828	-	1	ciRNA	-	ENSSSCT00000016449	FXYD6	mRNA	chr9:50267268-50267828	FXYD domain containing ion transport regulator 6 [Source:HGNC Symbol;Acc:HGNC:4030]	GO:0016021(integral component of membrane);GO:0016020(membrane);GO:0005887(integral component of plasma membrane);GO:0005886(plasma membrane);GO:2000649(regulation of sodium ion transmembrane transporter activity);GO:0034220(ion transmembrane transport);GO:0006811(ion transport);GO:0017080(sodium channel regulator activity);GO:0005216(ion channel activity)	NA	ssc-miR-7143-3p	m8	-0.144	55	161	-19.23
ciRNA123	chr9	50267294	50267828	-	1	ciRNA	-	ENSSSCT00000016449	FXYD6	mRNA	chr9:50267268-50267828	FXYD domain containing ion transport regulator 6 [Source:HGNC Symbol;Acc:HGNC:4030]	GO:0016021(integral component of membrane);GO:0016020(membrane);GO:0005887(integral component of plasma membrane);GO:0005886(plasma membrane);GO:2000649(regulation of sodium ion transmembrane transporter activity);GO:0034220(ion transmembrane transport);GO:0006811(ion transport);GO:0017080(sodium channel regulator activity);GO:0005216(ion channel activity)	NA	ssc-miR-885-3p	m8	-0.105	54	140	-16.63
ciRNA124	chr12	90272	93074	+	1	ciRNA	-	ENSSSCT00000018644	NARF	mRNA	chr12:90271-93101	nuclear prelamin A recognition factor [Source:HGNC Symbol;Acc:HGNC:29916]	GO:0031981(nuclear lumen);GO:0005730(nucleolus);GO:0005638(lamin filament);GO:0005634(nucleus);GO:0005521(lamin binding)	NA	ssc-miR-103	8mer	-0.1743	71	154	-21.26
ciRNA124	chr12	90272	93074	+	1	ciRNA	-	ENSSSCT00000018644	NARF	mRNA	chr12:90271-93101	nuclear prelamin A recognition factor [Source:HGNC Symbol;Acc:HGNC:29916]	GO:0031981(nuclear lumen);GO:0005730(nucleolus);GO:0005638(lamin filament);GO:0005634(nucleus);GO:0005521(lamin binding)	NA	ssc-miR-107	8mer	-0.1743	71	154	-21.26
ciRNA124	chr12	90272	93074	+	1	ciRNA	-	ENSSSCT00000018644	NARF	mRNA	chr12:90271-93101	nuclear prelamin A recognition factor [Source:HGNC Symbol;Acc:HGNC:29916]	GO:0031981(nuclear lumen);GO:0005730(nucleolus);GO:0005638(lamin filament);GO:0005634(nucleus);GO:0005521(lamin binding)	NA	ssc-miR-127	8mer	-0.13525	57	151	-26.01
ciRNA124	chr12	90272	93074	+	1	ciRNA	-	ENSSSCT00000018644	NARF	mRNA	chr12:90271-93101	nuclear prelamin A recognition factor [Source:HGNC Symbol;Acc:HGNC:29916]	GO:0031981(nuclear lumen);GO:0005730(nucleolus);GO:0005638(lamin filament);GO:0005634(nucleus);GO:0005521(lamin binding)	NA	ssc-miR-129a-5p	m8	-0.256	83	152	-29.23
ciRNA124	chr12	90272	93074	+	1	ciRNA	-	ENSSSCT00000018644	NARF	mRNA	chr12:90271-93101	nuclear prelamin A recognition factor [Source:HGNC Symbol;Acc:HGNC:29916]	GO:0031981(nuclear lumen);GO:0005730(nucleolus);GO:0005638(lamin filament);GO:0005634(nucleus);GO:0005521(lamin binding)	NA	ssc-miR-129b	m8	-0.256	83	152	-29.23
ciRNA124	chr12	90272	93074	+	1	ciRNA	-	ENSSSCT00000018644	NARF	mRNA	chr12:90271-93101	nuclear prelamin A recognition factor [Source:HGNC Symbol;Acc:HGNC:29916]	GO:0031981(nuclear lumen);GO:0005730(nucleolus);GO:0005638(lamin filament);GO:0005634(nucleus);GO:0005521(lamin binding)	NA	ssc-miR-1306-5p	8mer	-0.20315	72	152	-17.8
ciRNA124	chr12	90272	93074	+	1	ciRNA	-	ENSSSCT00000018644	NARF	mRNA	chr12:90271-93101	nuclear prelamin A recognition factor [Source:HGNC Symbol;Acc:HGNC:29916]	GO:0031981(nuclear lumen);GO:0005730(nucleolus);GO:0005638(lamin filament);GO:0005634(nucleus);GO:0005521(lamin binding)	NA	ssc-miR-136	8mer	-0.4552	98	148	-11.51
ciRNA124	chr12	90272	93074	+	1	ciRNA	-	ENSSSCT00000018644	NARF	mRNA	chr12:90271-93101	nuclear prelamin A recognition factor [Source:HGNC Symbol;Acc:HGNC:29916]	GO:0031981(nuclear lumen);GO:0005730(nucleolus);GO:0005638(lamin filament);GO:0005634(nucleus);GO:0005521(lamin binding)	NA	ssc-miR-139-3p	m8	-0.189	78	154	-27.62
ciRNA124	chr12	90272	93074	+	1	ciRNA	-	ENSSSCT00000018644	NARF	mRNA	chr12:90271-93101	nuclear prelamin A recognition factor [Source:HGNC Symbol;Acc:HGNC:29916]	GO:0031981(nuclear lumen);GO:0005730(nucleolus);GO:0005638(lamin filament);GO:0005634(nucleus);GO:0005521(lamin binding)	NA	ssc-miR-148a-5p	m8	-0.2375	77	150	-12.99
ciRNA124	chr12	90272	93074	+	1	ciRNA	-	ENSSSCT00000018644	NARF	mRNA	chr12:90271-93101	nuclear prelamin A recognition factor [Source:HGNC Symbol;Acc:HGNC:29916]	GO:0031981(nuclear lumen);GO:0005730(nucleolus);GO:0005638(lamin filament);GO:0005634(nucleus);GO:0005521(lamin binding)	NA	ssc-miR-148b-5p	m8	-0.2685	85	152	-16.58
ciRNA124	chr12	90272	93074	+	1	ciRNA	-	ENSSSCT00000018644	NARF	mRNA	chr12:90271-93101	nuclear prelamin A recognition factor [Source:HGNC Symbol;Acc:HGNC:29916]	GO:0031981(nuclear lumen);GO:0005730(nucleolus);GO:0005638(lamin filament);GO:0005634(nucleus);GO:0005521(lamin binding)	NA	ssc-miR-187	1a	-0.15905	60	148	-25.28
ciRNA124	chr12	90272	93074	+	1	ciRNA	-	ENSSSCT00000018644	NARF	mRNA	chr12:90271-93101	nuclear prelamin A recognition factor [Source:HGNC Symbol;Acc:HGNC:29916]	GO:0031981(nuclear lumen);GO:0005730(nucleolus);GO:0005638(lamin filament);GO:0005634(nucleus);GO:0005521(lamin binding)	NA	ssc-miR-18a	m8	-0.15	53	153	-19.06
ciRNA124	chr12	90272	93074	+	1	ciRNA	-	ENSSSCT00000018644	NARF	mRNA	chr12:90271-93101	nuclear prelamin A recognition factor [Source:HGNC Symbol;Acc:HGNC:29916]	GO:0031981(nuclear lumen);GO:0005730(nucleolus);GO:0005638(lamin filament);GO:0005634(nucleus);GO:0005521(lamin binding)	NA	ssc-miR-18b	m8	-0.15	53	152	-20.69
ciRNA124	chr12	90272	93074	+	1	ciRNA	-	ENSSSCT00000018644	NARF	mRNA	chr12:90271-93101	nuclear prelamin A recognition factor [Source:HGNC Symbol;Acc:HGNC:29916]	GO:0031981(nuclear lumen);GO:0005730(nucleolus);GO:0005638(lamin filament);GO:0005634(nucleus);GO:0005521(lamin binding)	NA	ssc-miR-24-3p	8mer	-0.27515	90	142	-18.66
ciRNA124	chr12	90272	93074	+	1	ciRNA	-	ENSSSCT00000018644	NARF	mRNA	chr12:90271-93101	nuclear prelamin A recognition factor [Source:HGNC Symbol;Acc:HGNC:29916]	GO:0031981(nuclear lumen);GO:0005730(nucleolus);GO:0005638(lamin filament);GO:0005634(nucleus);GO:0005521(lamin binding)	NA	ssc-miR-328	1a	-0.17965	80	140	-18.24
ciRNA124	chr12	90272	93074	+	1	ciRNA	-	ENSSSCT00000018644	NARF	mRNA	chr12:90271-93101	nuclear prelamin A recognition factor [Source:HGNC Symbol;Acc:HGNC:29916]	GO:0031981(nuclear lumen);GO:0005730(nucleolus);GO:0005638(lamin filament);GO:0005634(nucleus);GO:0005521(lamin binding)	NA	ssc-miR-4335	m8	-0.17	69	152	-26.78
ciRNA124	chr12	90272	93074	+	1	ciRNA	-	ENSSSCT00000018644	NARF	mRNA	chr12:90271-93101	nuclear prelamin A recognition factor [Source:HGNC Symbol;Acc:HGNC:29916]	GO:0031981(nuclear lumen);GO:0005730(nucleolus);GO:0005638(lamin filament);GO:0005634(nucleus);GO:0005521(lamin binding)	NA	ssc-miR-500	m8	-0.177	69	155	-22.21
ciRNA124	chr12	90272	93074	+	1	ciRNA	-	ENSSSCT00000018644	NARF	mRNA	chr12:90271-93101	nuclear prelamin A recognition factor [Source:HGNC Symbol;Acc:HGNC:29916]	GO:0031981(nuclear lumen);GO:0005730(nucleolus);GO:0005638(lamin filament);GO:0005634(nucleus);GO:0005521(lamin binding)	NA	ssc-miR-503	m8	-0.127	51	157	-30.84
ciRNA124	chr12	90272	93074	+	1	ciRNA	-	ENSSSCT00000018644	NARF	mRNA	chr12:90271-93101	nuclear prelamin A recognition factor [Source:HGNC Symbol;Acc:HGNC:29916]	GO:0031981(nuclear lumen);GO:0005730(nucleolus);GO:0005638(lamin filament);GO:0005634(nucleus);GO:0005521(lamin binding)	NA	ssc-miR-615	8mer	-0.12335	53	151	-23.17
ciRNA124	chr12	90272	93074	+	1	ciRNA	-	ENSSSCT00000018644	NARF	mRNA	chr12:90271-93101	nuclear prelamin A recognition factor [Source:HGNC Symbol;Acc:HGNC:29916]	GO:0031981(nuclear lumen);GO:0005730(nucleolus);GO:0005638(lamin filament);GO:0005634(nucleus);GO:0005521(lamin binding)	NA	ssc-miR-7137-3p	1a	-0.13695	53	147	-32.81
ciRNA124	chr12	90272	93074	+	1	ciRNA	-	ENSSSCT00000018644	NARF	mRNA	chr12:90271-93101	nuclear prelamin A recognition factor [Source:HGNC Symbol;Acc:HGNC:29916]	GO:0031981(nuclear lumen);GO:0005730(nucleolus);GO:0005638(lamin filament);GO:0005634(nucleus);GO:0005521(lamin binding)	NA	ssc-miR-7143-3p	m8	-0.207	79	163	-21.97
ciRNA124	chr12	90272	93074	+	1	ciRNA	-	ENSSSCT00000018644	NARF	mRNA	chr12:90271-93101	nuclear prelamin A recognition factor [Source:HGNC Symbol;Acc:HGNC:29916]	GO:0031981(nuclear lumen);GO:0005730(nucleolus);GO:0005638(lamin filament);GO:0005634(nucleus);GO:0005521(lamin binding)	NA	ssc-miR-9787-3p	m8	-0.1805	73	162	-21.08
ciRNA124	chr12	90272	93074	+	1	ciRNA	-	ENSSSCT00000018644	NARF	mRNA	chr12:90271-93101	nuclear prelamin A recognition factor [Source:HGNC Symbol;Acc:HGNC:29916]	GO:0031981(nuclear lumen);GO:0005730(nucleolus);GO:0005638(lamin filament);GO:0005634(nucleus);GO:0005521(lamin binding)	NA	ssc-miR-9788-3p	m8	-0.145	59	147	-18.65
ciRNA124	chr12	90272	93074	+	1	ciRNA	-	ENSSSCT00000018644	NARF	mRNA	chr12:90271-93101	nuclear prelamin A recognition factor [Source:HGNC Symbol;Acc:HGNC:29916]	GO:0031981(nuclear lumen);GO:0005730(nucleolus);GO:0005638(lamin filament);GO:0005634(nucleus);GO:0005521(lamin binding)	NA	ssc-miR-9804-5p	1a	-0.13195	58	143	-23.57
ciRNA124	chr12	90272	93074	+	1	ciRNA	-	ENSSSCT00000018644	NARF	mRNA	chr12:90271-93101	nuclear prelamin A recognition factor [Source:HGNC Symbol;Acc:HGNC:29916]	GO:0031981(nuclear lumen);GO:0005730(nucleolus);GO:0005638(lamin filament);GO:0005634(nucleus);GO:0005521(lamin binding)	NA	ssc-miR-9810-3p	m8	-0.1315	61	142	-23.56
ciRNA124	chr12	90272	93074	+	1	ciRNA	-	ENSSSCT00000018644	NARF	mRNA	chr12:90271-93101	nuclear prelamin A recognition factor [Source:HGNC Symbol;Acc:HGNC:29916]	GO:0031981(nuclear lumen);GO:0005730(nucleolus);GO:0005638(lamin filament);GO:0005634(nucleus);GO:0005521(lamin binding)	NA	ssc-miR-9857-5p	m8	-0.148	59	164	-23.62
ciRNA124	chr12	90272	93074	+	1	ciRNA	-	ENSSSCT00000018644	NARF	mRNA	chr12:90271-93101	nuclear prelamin A recognition factor [Source:HGNC Symbol;Acc:HGNC:29916]	GO:0031981(nuclear lumen);GO:0005730(nucleolus);GO:0005638(lamin filament);GO:0005634(nucleus);GO:0005521(lamin binding)	NA	ssc-miR-9859-3p	m8	-0.303	89	140	-16.6
ciRNA125	chr12	1203729	1205761	-	1	ciRNA	-	ENSSSCT00000023942	BAHCC1	mRNA	chr12:1203708-1205761	BAH domain and coiled-coil containing 1 [Source:HGNC Symbol;Acc:HGNC:29279]	GO:0005677(chromatin silencing complex);GO:0000785(chromatin);GO:0031507(heterochromatin assembly);GO:0006342(chromatin silencing);GO:0003682(chromatin binding);GO:0000976(transcription regulatory region sequence-specific DNA binding)	NA	ssc-miR-125a	m8	-0.288	87	145	-15.5
ciRNA125	chr12	1203729	1205761	-	1	ciRNA	-	ENSSSCT00000023942	BAHCC1	mRNA	chr12:1203708-1205761	BAH domain and coiled-coil containing 1 [Source:HGNC Symbol;Acc:HGNC:29279]	GO:0005677(chromatin silencing complex);GO:0000785(chromatin);GO:0031507(heterochromatin assembly);GO:0006342(chromatin silencing);GO:0003682(chromatin binding);GO:0000976(transcription regulatory region sequence-specific DNA binding)	NA	ssc-miR-125b	m8	-0.288	86	153	-15.07
ciRNA125	chr12	1203729	1205761	-	1	ciRNA	-	ENSSSCT00000023942	BAHCC1	mRNA	chr12:1203708-1205761	BAH domain and coiled-coil containing 1 [Source:HGNC Symbol;Acc:HGNC:29279]	GO:0005677(chromatin silencing complex);GO:0000785(chromatin);GO:0031507(heterochromatin assembly);GO:0006342(chromatin silencing);GO:0003682(chromatin binding);GO:0000976(transcription regulatory region sequence-specific DNA binding)	NA	ssc-miR-129a-3p	8mer	-0.2581	88	140	-10.54
ciRNA125	chr12	1203729	1205761	-	1	ciRNA	-	ENSSSCT00000023942	BAHCC1	mRNA	chr12:1203708-1205761	BAH domain and coiled-coil containing 1 [Source:HGNC Symbol;Acc:HGNC:29279]	GO:0005677(chromatin silencing complex);GO:0000785(chromatin);GO:0031507(heterochromatin assembly);GO:0006342(chromatin silencing);GO:0003682(chromatin binding);GO:0000976(transcription regulatory region sequence-specific DNA binding)	NA	ssc-miR-129a-5p	8mer	-0.3003	88	151	-13.05
ciRNA125	chr12	1203729	1205761	-	1	ciRNA	-	ENSSSCT00000023942	BAHCC1	mRNA	chr12:1203708-1205761	BAH domain and coiled-coil containing 1 [Source:HGNC Symbol;Acc:HGNC:29279]	GO:0005677(chromatin silencing complex);GO:0000785(chromatin);GO:0031507(heterochromatin assembly);GO:0006342(chromatin silencing);GO:0003682(chromatin binding);GO:0000976(transcription regulatory region sequence-specific DNA binding)	NA	ssc-miR-129b	8mer	-0.3003	88	151	-13.05
ciRNA125	chr12	1203729	1205761	-	1	ciRNA	-	ENSSSCT00000023942	BAHCC1	mRNA	chr12:1203708-1205761	BAH domain and coiled-coil containing 1 [Source:HGNC Symbol;Acc:HGNC:29279]	GO:0005677(chromatin silencing complex);GO:0000785(chromatin);GO:0031507(heterochromatin assembly);GO:0006342(chromatin silencing);GO:0003682(chromatin binding);GO:0000976(transcription regulatory region sequence-specific DNA binding)	NA	ssc-miR-148b-3p	m8	-0.1325	51	151	-18.78
ciRNA125	chr12	1203729	1205761	-	1	ciRNA	-	ENSSSCT00000023942	BAHCC1	mRNA	chr12:1203708-1205761	BAH domain and coiled-coil containing 1 [Source:HGNC Symbol;Acc:HGNC:29279]	GO:0005677(chromatin silencing complex);GO:0000785(chromatin);GO:0031507(heterochromatin assembly);GO:0006342(chromatin silencing);GO:0003682(chromatin binding);GO:0000976(transcription regulatory region sequence-specific DNA binding)	NA	ssc-miR-328	m8	-0.1235	59	164	-33.42
ciRNA125	chr12	1203729	1205761	-	1	ciRNA	-	ENSSSCT00000023942	BAHCC1	mRNA	chr12:1203708-1205761	BAH domain and coiled-coil containing 1 [Source:HGNC Symbol;Acc:HGNC:29279]	GO:0005677(chromatin silencing complex);GO:0000785(chromatin);GO:0031507(heterochromatin assembly);GO:0006342(chromatin silencing);GO:0003682(chromatin binding);GO:0000976(transcription regulatory region sequence-specific DNA binding)	NA	ssc-miR-484	m8	-0.11	54	151	-32.44
ciRNA125	chr12	1203729	1205761	-	1	ciRNA	-	ENSSSCT00000023942	BAHCC1	mRNA	chr12:1203708-1205761	BAH domain and coiled-coil containing 1 [Source:HGNC Symbol;Acc:HGNC:29279]	GO:0005677(chromatin silencing complex);GO:0000785(chromatin);GO:0031507(heterochromatin assembly);GO:0006342(chromatin silencing);GO:0003682(chromatin binding);GO:0000976(transcription regulatory region sequence-specific DNA binding)	NA	ssc-miR-7	8mer	-0.2142	81	151	-21.52
ciRNA125	chr12	1203729	1205761	-	1	ciRNA	-	ENSSSCT00000023942	BAHCC1	mRNA	chr12:1203708-1205761	BAH domain and coiled-coil containing 1 [Source:HGNC Symbol;Acc:HGNC:29279]	GO:0005677(chromatin silencing complex);GO:0000785(chromatin);GO:0031507(heterochromatin assembly);GO:0006342(chromatin silencing);GO:0003682(chromatin binding);GO:0000976(transcription regulatory region sequence-specific DNA binding)	NA	ssc-miR-7135-3p	m8	-0.1865	61	140	-14.26
ciRNA125	chr12	1203729	1205761	-	1	ciRNA	-	ENSSSCT00000023942	BAHCC1	mRNA	chr12:1203708-1205761	BAH domain and coiled-coil containing 1 [Source:HGNC Symbol;Acc:HGNC:29279]	GO:0005677(chromatin silencing complex);GO:0000785(chromatin);GO:0031507(heterochromatin assembly);GO:0006342(chromatin silencing);GO:0003682(chromatin binding);GO:0000976(transcription regulatory region sequence-specific DNA binding)	NA	ssc-miR-7137-3p	8mer	-0.19525	72	158	-35.48
ciRNA125	chr12	1203729	1205761	-	1	ciRNA	-	ENSSSCT00000023942	BAHCC1	mRNA	chr12:1203708-1205761	BAH domain and coiled-coil containing 1 [Source:HGNC Symbol;Acc:HGNC:29279]	GO:0005677(chromatin silencing complex);GO:0000785(chromatin);GO:0031507(heterochromatin assembly);GO:0006342(chromatin silencing);GO:0003682(chromatin binding);GO:0000976(transcription regulatory region sequence-specific DNA binding)	NA	ssc-miR-758	8mer	-0.3752	94	150	-16.85
ciRNA125	chr12	1203729	1205761	-	1	ciRNA	-	ENSSSCT00000023942	BAHCC1	mRNA	chr12:1203708-1205761	BAH domain and coiled-coil containing 1 [Source:HGNC Symbol;Acc:HGNC:29279]	GO:0005677(chromatin silencing complex);GO:0000785(chromatin);GO:0031507(heterochromatin assembly);GO:0006342(chromatin silencing);GO:0003682(chromatin binding);GO:0000976(transcription regulatory region sequence-specific DNA binding)	NA	ssc-miR-9847-3p	8mer	-0.2183	79	155	-27.91
ciRNA125	chr12	1203729	1205761	-	1	ciRNA	-	ENSSSCT00000023942	BAHCC1	mRNA	chr12:1203708-1205761	BAH domain and coiled-coil containing 1 [Source:HGNC Symbol;Acc:HGNC:29279]	GO:0005677(chromatin silencing complex);GO:0000785(chromatin);GO:0031507(heterochromatin assembly);GO:0006342(chromatin silencing);GO:0003682(chromatin binding);GO:0000976(transcription regulatory region sequence-specific DNA binding)	NA	ssc-miR-9848-3p	m8	-0.153	68	140	-14.67
ciRNA126	chr12	5578854	5579323	+	1	ciRNA	-	ENSSSCT00000018727	H3F3A	mRNA	chr12:5578853-5579323	H3 histone family member 3A [Source:HGNC Symbol;Acc:HGNC:4764]	GO:0070062(extracellular exosome);GO:0043234(protein complex);GO:0005694(chromosome);GO:0005634(nucleus);GO:0001740(Barr body);GO:0000788(nuclear nucleosome);GO:0000786(nucleosome);GO:0000784(nuclear chromosome, telomeric region);GO:0000228(nuclear chromosome);GO:1902340(negative regulation of chromosome condensation);GO:0090230(regulation of centromere complex assembly);GO:0048477(oogenesis);GO:…	05202(Transcriptional misregulation in cancers);05322(Systemic lupus erythematosus);05034(Alcoholism)	ssc-miR-331-3p	8mer	-0.153	67	145	-20.34
ciRNA126	chr12	5578854	5579323	+	1	ciRNA	-	ENSSSCT00000018727	H3F3A	mRNA	chr12:5578853-5579323	H3 histone family member 3A [Source:HGNC Symbol;Acc:HGNC:4764]	GO:0070062(extracellular exosome);GO:0043234(protein complex);GO:0005694(chromosome);GO:0005634(nucleus);GO:0001740(Barr body);GO:0000788(nuclear nucleosome);GO:0000786(nucleosome);GO:0000784(nuclear chromosome, telomeric region);GO:0000228(nuclear chromosome);GO:1902340(negative regulation of chromosome condensation);GO:0090230(regulation of centromere complex assembly);GO:0048477(oogenesis);GO:…	05202(Transcriptional misregulation in cancers);05322(Systemic lupus erythematosus);05034(Alcoholism)	ssc-miR-4332	m8	-0.1145	60	154	-25.24
ciRNA127	chr12	22891428	22891761	+	1	ciRNA	-	ENSSSCT00000029526	ENSSSCG00000021018	mRNA	chr12:22891427-22891797	NA	NA	NA	ssc-miR-150	m8	-0.1985	76	154	-18.24
ciRNA128	chrX	58591315	58591543	+	1	ciRNA	-	ENSSSCT00000013522	MSN	mRNA	chrX:58591314-58591572	moesin [Source:HGNC Symbol;Acc:HGNC:7373]	GO:0072562(blood microparticle);GO:0071944(cell periphery);GO:0070062(extracellular exosome);GO:0048471(perinuclear region of cytoplasm);GO:0045177(apical part of cell);GO:0043209(myelin sheath);GO:0031982(vesicle);GO:0031143(pseudopodium);GO:0030175(filopodium);GO:0019898(extrinsic component of membrane);GO:0016324(apical plasma membrane);GO:0016323(basolateral plasma membrane);GO:0005925(focal …	04810(Regulation of actin cytoskeleton);04670(Leukocyte transendothelial migration);05205(Proteoglycans in cancer);05162(Measles)	ssc-miR-2320-5p	m8	-0.1535	58	140	-16.89
ciRNA128	chrX	58591315	58591543	+	1	ciRNA	-	ENSSSCT00000013522	MSN	mRNA	chrX:58591314-58591572	moesin [Source:HGNC Symbol;Acc:HGNC:7373]	GO:0072562(blood microparticle);GO:0071944(cell periphery);GO:0070062(extracellular exosome);GO:0048471(perinuclear region of cytoplasm);GO:0045177(apical part of cell);GO:0043209(myelin sheath);GO:0031982(vesicle);GO:0031143(pseudopodium);GO:0030175(filopodium);GO:0019898(extrinsic component of membrane);GO:0016324(apical plasma membrane);GO:0016323(basolateral plasma membrane);GO:0005925(focal …	04810(Regulation of actin cytoskeleton);04670(Leukocyte transendothelial migration);05205(Proteoglycans in cancer);05162(Measles)	ssc-miR-326	m8	-0.2235	82	148	-26.01
ciRNA128	chrX	58591315	58591543	+	1	ciRNA	-	ENSSSCT00000013522	MSN	mRNA	chrX:58591314-58591572	moesin [Source:HGNC Symbol;Acc:HGNC:7373]	GO:0072562(blood microparticle);GO:0071944(cell periphery);GO:0070062(extracellular exosome);GO:0048471(perinuclear region of cytoplasm);GO:0045177(apical part of cell);GO:0043209(myelin sheath);GO:0031982(vesicle);GO:0031143(pseudopodium);GO:0030175(filopodium);GO:0019898(extrinsic component of membrane);GO:0016324(apical plasma membrane);GO:0016323(basolateral plasma membrane);GO:0005925(focal …	04810(Regulation of actin cytoskeleton);04670(Leukocyte transendothelial migration);05205(Proteoglycans in cancer);05162(Measles)	ssc-miR-331-5p	8mer	-0.29325	95	147	-19.21
ciRNA128	chrX	58591315	58591543	+	1	ciRNA	-	ENSSSCT00000013522	MSN	mRNA	chrX:58591314-58591572	moesin [Source:HGNC Symbol;Acc:HGNC:7373]	GO:0072562(blood microparticle);GO:0071944(cell periphery);GO:0070062(extracellular exosome);GO:0048471(perinuclear region of cytoplasm);GO:0045177(apical part of cell);GO:0043209(myelin sheath);GO:0031982(vesicle);GO:0031143(pseudopodium);GO:0030175(filopodium);GO:0019898(extrinsic component of membrane);GO:0016324(apical plasma membrane);GO:0016323(basolateral plasma membrane);GO:0005925(focal …	04810(Regulation of actin cytoskeleton);04670(Leukocyte transendothelial migration);05205(Proteoglycans in cancer);05162(Measles)	ssc-miR-7135-3p	m8	-0.1825	60	178	-30.63
ciRNA128	chrX	58591315	58591543	+	1	ciRNA	-	ENSSSCT00000013522	MSN	mRNA	chrX:58591314-58591572	moesin [Source:HGNC Symbol;Acc:HGNC:7373]	GO:0072562(blood microparticle);GO:0071944(cell periphery);GO:0070062(extracellular exosome);GO:0048471(perinuclear region of cytoplasm);GO:0045177(apical part of cell);GO:0043209(myelin sheath);GO:0031982(vesicle);GO:0031143(pseudopodium);GO:0030175(filopodium);GO:0019898(extrinsic component of membrane);GO:0016324(apical plasma membrane);GO:0016323(basolateral plasma membrane);GO:0005925(focal …	04810(Regulation of actin cytoskeleton);04670(Leukocyte transendothelial migration);05205(Proteoglycans in cancer);05162(Measles)	ssc-miR-7139-3p	m8	-0.193	75	162	-29.16
ciRNA128	chrX	58591315	58591543	+	1	ciRNA	-	ENSSSCT00000013522	MSN	mRNA	chrX:58591314-58591572	moesin [Source:HGNC Symbol;Acc:HGNC:7373]	GO:0072562(blood microparticle);GO:0071944(cell periphery);GO:0070062(extracellular exosome);GO:0048471(perinuclear region of cytoplasm);GO:0045177(apical part of cell);GO:0043209(myelin sheath);GO:0031982(vesicle);GO:0031143(pseudopodium);GO:0030175(filopodium);GO:0019898(extrinsic component of membrane);GO:0016324(apical plasma membrane);GO:0016323(basolateral plasma membrane);GO:0005925(focal …	04810(Regulation of actin cytoskeleton);04670(Leukocyte transendothelial migration);05205(Proteoglycans in cancer);05162(Measles)	ssc-miR-9830-5p	m8	-0.227	78	145	-18.23
ciRNA129	chrX	140190024	140190344	-	1	ciRNA	-	ENSSSCT00000013934	ENSSSCG00000012745	mRNA	chrX:140189996-140190344	NA	GO:0005634(nucleus);GO:0032392(DNA geometric change);GO:0008301(DNA binding, bending);GO:0003677(DNA binding);GO:0000400(four-way junction DNA binding)	NA	ssc-miR-150	8mer	-0.2753	89	143	-21.93
ciRNA129	chrX	140190024	140190344	-	1	ciRNA	-	ENSSSCT00000013934	ENSSSCG00000012745	mRNA	chrX:140189996-140190344	NA	GO:0005634(nucleus);GO:0032392(DNA geometric change);GO:0008301(DNA binding, bending);GO:0003677(DNA binding);GO:0000400(four-way junction DNA binding)	NA	ssc-miR-296-5p	m8	-0.144	69	140	-26.61
ciRNA129	chrX	140190024	140190344	-	1	ciRNA	-	ENSSSCT00000013934	ENSSSCG00000012745	mRNA	chrX:140189996-140190344	NA	GO:0005634(nucleus);GO:0032392(DNA geometric change);GO:0008301(DNA binding, bending);GO:0003677(DNA binding);GO:0000400(four-way junction DNA binding)	NA	ssc-miR-335	8mer	-0.1852	67	145	-14.13
ciRNA129	chrX	140190024	140190344	-	1	ciRNA	-	ENSSSCT00000013934	ENSSSCG00000012745	mRNA	chrX:140189996-140190344	NA	GO:0005634(nucleus);GO:0032392(DNA geometric change);GO:0008301(DNA binding, bending);GO:0003677(DNA binding);GO:0000400(four-way junction DNA binding)	NA	ssc-miR-484	m8	-0.1375	67	158	-28.84
ciRNA13	chr2	149484428	149484720	-	1	ciRNA	-	ENSSSCT00000015725	HDAC3	mRNA	chr2:149484408-149484720	histone deacetylase 3 [Source:HGNC Symbol;Acc:HGNC:4854]	GO:0017053(transcriptional repressor complex);GO:0005886(plasma membrane);GO:0005876(spindle microtubule);GO:0005829(cytosol);GO:0005794(Golgi apparatus);GO:0005737(cytoplasm);GO:0005654(nucleoplasm);GO:0005634(nucleus);GO:0071498(cellular response to fluid shear stress);GO:0070932(histone H3 deacetylation);GO:0051225(spindle assembly);GO:0046329(negative regulation of JNK cascade);GO:0045944(pos…	04919(Thyroid hormone signaling pathway);05203(Viral carcinogenesis);05034(Alcoholism)	ssc-miR-331-3p	8mer	-0.3582	95	157	-26.65
ciRNA130	chr7	43555334	43555548	-	1	ciRNA	-	ENSSSCT00000001847	CUL7	mRNA	chr7:43555275-43555548	cullin 7 [Source:HGNC Symbol;Acc:HGNC:21024]	GO:1990393(3M complex);GO:0048471(perinuclear region of cytoplasm);GO:0031467(Cul7-RING ubiquitin ligase complex);GO:0005813(centrosome);GO:0005794(Golgi apparatus);GO:0005737(cytoplasm);GO:0050775(positive regulation of dendrite morphogenesis);GO:0016567(protein ubiquitination);GO:0007088(regulation of mitotic nuclear division);GO:0006511(ubiquitin-dependent protein catabolic process);GO:0001890…	NA	ssc-miR-129a-3p	m8	-0.1745	74	152	-22.42
ciRNA130	chr7	43555334	43555548	-	1	ciRNA	-	ENSSSCT00000001847	CUL7	mRNA	chr7:43555275-43555548	cullin 7 [Source:HGNC Symbol;Acc:HGNC:21024]	GO:1990393(3M complex);GO:0048471(perinuclear region of cytoplasm);GO:0031467(Cul7-RING ubiquitin ligase complex);GO:0005813(centrosome);GO:0005794(Golgi apparatus);GO:0005737(cytoplasm);GO:0050775(positive regulation of dendrite morphogenesis);GO:0016567(protein ubiquitination);GO:0007088(regulation of mitotic nuclear division);GO:0006511(ubiquitin-dependent protein catabolic process);GO:0001890…	NA	ssc-miR-7144-5p	m8	-0.162	60	160	-24.76
ciRNA130	chr7	43555334	43555548	-	1	ciRNA	-	ENSSSCT00000001847	CUL7	mRNA	chr7:43555275-43555548	cullin 7 [Source:HGNC Symbol;Acc:HGNC:21024]	GO:1990393(3M complex);GO:0048471(perinuclear region of cytoplasm);GO:0031467(Cul7-RING ubiquitin ligase complex);GO:0005813(centrosome);GO:0005794(Golgi apparatus);GO:0005737(cytoplasm);GO:0050775(positive regulation of dendrite morphogenesis);GO:0016567(protein ubiquitination);GO:0007088(regulation of mitotic nuclear division);GO:0006511(ubiquitin-dependent protein catabolic process);GO:0001890…	NA	ssc-miR-9845-5p	8mer	-0.31035	90	150	-21.89
ciRNA130	chr7	43555334	43555548	-	1	ciRNA	-	ENSSSCT00000001847	CUL7	mRNA	chr7:43555275-43555548	cullin 7 [Source:HGNC Symbol;Acc:HGNC:21024]	GO:1990393(3M complex);GO:0048471(perinuclear region of cytoplasm);GO:0031467(Cul7-RING ubiquitin ligase complex);GO:0005813(centrosome);GO:0005794(Golgi apparatus);GO:0005737(cytoplasm);GO:0050775(positive regulation of dendrite morphogenesis);GO:0016567(protein ubiquitination);GO:0007088(regulation of mitotic nuclear division);GO:0006511(ubiquitin-dependent protein catabolic process);GO:0001890…	NA	ssc-miR-9847-3p	8mer	-0.34935	94	145	-20.77
ciRNA131	chr7	80355331	80355659	+	1	ciRNA	-	ENSSSCT00000002235	ENSSSCG00000001997	mRNA	chr7:80355330-80355659	NA	GO:0016311(dephosphorylation);GO:0016791(phosphatase activity)	NA	ssc-miR-124a	m8	-0.2285	80	154	-17.79
ciRNA131	chr7	80355331	80355659	+	1	ciRNA	-	ENSSSCT00000002235	ENSSSCG00000001997	mRNA	chr7:80355330-80355659	NA	GO:0016311(dephosphorylation);GO:0016791(phosphatase activity)	NA	ssc-miR-144	m8	-0.183	63	148	-12.84
ciRNA131	chr7	80355331	80355659	+	1	ciRNA	-	ENSSSCT00000002235	ENSSSCG00000001997	mRNA	chr7:80355330-80355659	NA	GO:0016311(dephosphorylation);GO:0016791(phosphatase activity)	NA	ssc-miR-212	m8	-0.198	73	151	-17.66
ciRNA131	chr7	80355331	80355659	+	1	ciRNA	-	ENSSSCT00000002235	ENSSSCG00000001997	mRNA	chr7:80355330-80355659	NA	GO:0016311(dephosphorylation);GO:0016791(phosphatase activity)	NA	ssc-miR-2320-5p	m8	-0.169	64	146	-18.59
ciRNA131	chr7	80355331	80355659	+	1	ciRNA	-	ENSSSCT00000002235	ENSSSCG00000001997	mRNA	chr7:80355330-80355659	NA	GO:0016311(dephosphorylation);GO:0016791(phosphatase activity)	NA	ssc-miR-30a-5p	m8	-0.181	63	144	-12.05
ciRNA131	chr7	80355331	80355659	+	1	ciRNA	-	ENSSSCT00000002235	ENSSSCG00000001997	mRNA	chr7:80355330-80355659	NA	GO:0016311(dephosphorylation);GO:0016791(phosphatase activity)	NA	ssc-miR-30b-5p	m8	-0.212	70	140	-10.82
ciRNA131	chr7	80355331	80355659	+	1	ciRNA	-	ENSSSCT00000002235	ENSSSCG00000001997	mRNA	chr7:80355330-80355659	NA	GO:0016311(dephosphorylation);GO:0016791(phosphatase activity)	NA	ssc-miR-30c-5p	m8	-0.212	69	140	-10.42
ciRNA131	chr7	80355331	80355659	+	1	ciRNA	-	ENSSSCT00000002235	ENSSSCG00000001997	mRNA	chr7:80355330-80355659	NA	GO:0016311(dephosphorylation);GO:0016791(phosphatase activity)	NA	ssc-miR-30d	m8	-0.181	64	144	-12.32
ciRNA131	chr7	80355331	80355659	+	1	ciRNA	-	ENSSSCT00000002235	ENSSSCG00000001997	mRNA	chr7:80355330-80355659	NA	GO:0016311(dephosphorylation);GO:0016791(phosphatase activity)	NA	ssc-miR-30e-5p	m8	-0.181	61	144	-12.32
ciRNA131	chr7	80355331	80355659	+	1	ciRNA	-	ENSSSCT00000002235	ENSSSCG00000001997	mRNA	chr7:80355330-80355659	NA	GO:0016311(dephosphorylation);GO:0016791(phosphatase activity)	NA	ssc-miR-338	8mer	-0.3002	90	150	-18.64
ciRNA131	chr7	80355331	80355659	+	1	ciRNA	-	ENSSSCT00000002235	ENSSSCG00000001997	mRNA	chr7:80355330-80355659	NA	GO:0016311(dephosphorylation);GO:0016791(phosphatase activity)	NA	ssc-miR-490	8mer	-0.29225	86	154	-19.04
ciRNA131	chr7	80355331	80355659	+	1	ciRNA	-	ENSSSCT00000002235	ENSSSCG00000001997	mRNA	chr7:80355330-80355659	NA	GO:0016311(dephosphorylation);GO:0016791(phosphatase activity)	NA	ssc-miR-490-3p	8mer	-0.29225	86	154	-19.04
ciRNA131	chr7	80355331	80355659	+	1	ciRNA	-	ENSSSCT00000002235	ENSSSCG00000001997	mRNA	chr7:80355330-80355659	NA	GO:0016311(dephosphorylation);GO:0016791(phosphatase activity)	NA	ssc-miR-7137-5p	8mer	-0.3812	98	141	-17.38
ciRNA131	chr7	80355331	80355659	+	1	ciRNA	-	ENSSSCT00000002235	ENSSSCG00000001997	mRNA	chr7:80355330-80355659	NA	GO:0016311(dephosphorylation);GO:0016791(phosphatase activity)	NA	ssc-miR-769-3p	m8	-0.159	66	148	-21.14
ciRNA131	chr7	80355331	80355659	+	1	ciRNA	-	ENSSSCT00000002235	ENSSSCG00000001997	mRNA	chr7:80355330-80355659	NA	GO:0016311(dephosphorylation);GO:0016791(phosphatase activity)	NA	ssc-miR-9816-3p	m8	-0.133	51	148	-18.32
ciRNA134	chr6	55510628	55511150	+	1	ciRNA	-	ENSSSCT00000003679	NLRP8	mRNA	chr6:55510627-55511176	NLR family pyrin domain containing 8 [Source:HGNC Symbol;Acc:HGNC:22940]	GO:0070997(neuron death);GO:0005524(ATP binding);GO:0000166(nucleotide binding)	NA	ssc-miR-185	m8	-0.1235	50	149	-14.5
ciRNA134	chr6	55510628	55511150	+	1	ciRNA	-	ENSSSCT00000003679	NLRP8	mRNA	chr6:55510627-55511176	NLR family pyrin domain containing 8 [Source:HGNC Symbol;Acc:HGNC:22940]	GO:0070997(neuron death);GO:0005524(ATP binding);GO:0000166(nucleotide binding)	NA	ssc-miR-22-5p	m8	-0.2155	65	156	-11.12
ciRNA134	chr6	55510628	55511150	+	1	ciRNA	-	ENSSSCT00000003679	NLRP8	mRNA	chr6:55510627-55511176	NLR family pyrin domain containing 8 [Source:HGNC Symbol;Acc:HGNC:22940]	GO:0070997(neuron death);GO:0005524(ATP binding);GO:0000166(nucleotide binding)	NA	ssc-miR-2411	8mer	-0.2043	76	146	-22.04
ciRNA134	chr6	55510628	55511150	+	1	ciRNA	-	ENSSSCT00000003679	NLRP8	mRNA	chr6:55510627-55511176	NLR family pyrin domain containing 8 [Source:HGNC Symbol;Acc:HGNC:22940]	GO:0070997(neuron death);GO:0005524(ATP binding);GO:0000166(nucleotide binding)	NA	ssc-miR-3613	8mer	-0.3292	87	150	-13.61
ciRNA134	chr6	55510628	55511150	+	1	ciRNA	-	ENSSSCT00000003679	NLRP8	mRNA	chr6:55510627-55511176	NLR family pyrin domain containing 8 [Source:HGNC Symbol;Acc:HGNC:22940]	GO:0070997(neuron death);GO:0005524(ATP binding);GO:0000166(nucleotide binding)	NA	ssc-miR-362	m8	-0.1715	60	153	-20.72
ciRNA134	chr6	55510628	55511150	+	1	ciRNA	-	ENSSSCT00000003679	NLRP8	mRNA	chr6:55510627-55511176	NLR family pyrin domain containing 8 [Source:HGNC Symbol;Acc:HGNC:22940]	GO:0070997(neuron death);GO:0005524(ATP binding);GO:0000166(nucleotide binding)	NA	ssc-miR-484	8mer	-0.3813	96	141	-19.31
ciRNA134	chr6	55510628	55511150	+	1	ciRNA	-	ENSSSCT00000003679	NLRP8	mRNA	chr6:55510627-55511176	NLR family pyrin domain containing 8 [Source:HGNC Symbol;Acc:HGNC:22940]	GO:0070997(neuron death);GO:0005524(ATP binding);GO:0000166(nucleotide binding)	NA	ssc-miR-758	m8	-0.17	65	144	-13.02
ciRNA134	chr6	55510628	55511150	+	1	ciRNA	-	ENSSSCT00000003679	NLRP8	mRNA	chr6:55510627-55511176	NLR family pyrin domain containing 8 [Source:HGNC Symbol;Acc:HGNC:22940]	GO:0070997(neuron death);GO:0005524(ATP binding);GO:0000166(nucleotide binding)	NA	ssc-miR-9790-3p	8mer	-0.2412	86	162	-16.39
ciRNA134	chr6	55510628	55511150	+	1	ciRNA	-	ENSSSCT00000003679	NLRP8	mRNA	chr6:55510627-55511176	NLR family pyrin domain containing 8 [Source:HGNC Symbol;Acc:HGNC:22940]	GO:0070997(neuron death);GO:0005524(ATP binding);GO:0000166(nucleotide binding)	NA	ssc-miR-9807-5p	8mer	-0.39825	95	148	-14.19
ciRNA135	chr6	58097466	58097898	-	1	ciRNA	-	ENSSSCT00000003708	INTS11	mRNA	chr6:58097431-58097898	integrator complex subunit 11 [Source:HGNC Symbol;Acc:HGNC:26052]	GO:0072562(blood microparticle);GO:0032039(integrator complex);GO:0005829(cytosol);GO:0005654(nucleoplasm);GO:0016180(snRNA processing)	NA	ssc-miR-370	8mer	-0.2962	87	145	-22.75
ciRNA135	chr6	58097466	58097898	-	1	ciRNA	-	ENSSSCT00000003708	INTS11	mRNA	chr6:58097431-58097898	integrator complex subunit 11 [Source:HGNC Symbol;Acc:HGNC:26052]	GO:0072562(blood microparticle);GO:0032039(integrator complex);GO:0005829(cytosol);GO:0005654(nucleoplasm);GO:0016180(snRNA processing)	NA	ssc-miR-9810-3p	8mer	-0.1911	82	140	-17.21
ciRNA136	chr6	96884311	96884483	-	1	ciRNA	-	ENSSSCT00000025549	ENSSSCG00000023052	mRNA	chr6:96881580-96884483	NA	GO:0005694(chromosome);GO:0051276(chromosome organization);GO:0005524(ATP binding)	NA	ssc-miR-9789-3p	1a	-0.2433	81	152	-14.1
ciRNA137	chr5	23515660	23515958	+	1	ciRNA	-	ENSSSCT00000000434	RBMS2	mRNA	chr5:23515659-23515990	RNA binding motif single stranded interacting protein 2 [Source:HGNC Symbol;Acc:HGNC:9909]	GO:0003723(RNA binding);GO:0003676(nucleic acid binding);GO:0000166(nucleotide binding)	NA	ssc-miR-129a-3p	m8	-0.194	78	146	-11.25
ciRNA137	chr5	23515660	23515958	+	1	ciRNA	-	ENSSSCT00000000434	RBMS2	mRNA	chr5:23515659-23515990	RNA binding motif single stranded interacting protein 2 [Source:HGNC Symbol;Acc:HGNC:9909]	GO:0003723(RNA binding);GO:0003676(nucleic acid binding);GO:0000166(nucleotide binding)	NA	ssc-miR-338	m8	-0.129	55	147	-15.19
ciRNA137	chr5	23515660	23515958	+	1	ciRNA	-	ENSSSCT00000000434	RBMS2	mRNA	chr5:23515659-23515990	RNA binding motif single stranded interacting protein 2 [Source:HGNC Symbol;Acc:HGNC:9909]	GO:0003723(RNA binding);GO:0003676(nucleic acid binding);GO:0000166(nucleotide binding)	NA	ssc-miR-9801-5p	m8	-0.211	73	156	-12.51
ciRNA138	chr5	84017100	84017351	-	1	ciRNA	-	ENSSSCT00000000926	HSP90B1	mRNA	chr5:84017083-84017351	endoplasmin precursor [Source:RefSeq peptide;Acc:NP_999268]	GO:0070062(extracellular exosome);GO:0048471(perinuclear region of cytoplasm);GO:0034663(endoplasmic reticulum chaperone complex);GO:0031012(extracellular matrix);GO:0030496(midbody);GO:0016020(membrane);GO:0005925(focal adhesion);GO:0005886(plasma membrane);GO:0005829(cytosol);GO:0005789(endoplasmic reticulum membrane);GO:0005788(endoplasmic reticulum lumen);GO:0005783(endoplasmic reticulum);GO:…	NA	ssc-miR-181a	m8	-0.164	52	156	-16.25
ciRNA138	chr5	84017100	84017351	-	1	ciRNA	-	ENSSSCT00000000926	HSP90B1	mRNA	chr5:84017083-84017351	endoplasmin precursor [Source:RefSeq peptide;Acc:NP_999268]	GO:0070062(extracellular exosome);GO:0048471(perinuclear region of cytoplasm);GO:0034663(endoplasmic reticulum chaperone complex);GO:0031012(extracellular matrix);GO:0030496(midbody);GO:0016020(membrane);GO:0005925(focal adhesion);GO:0005886(plasma membrane);GO:0005829(cytosol);GO:0005789(endoplasmic reticulum membrane);GO:0005788(endoplasmic reticulum lumen);GO:0005783(endoplasmic reticulum);GO:…	NA	ssc-miR-181c	m8	-0.164	54	154	-11.65
ciRNA138	chr5	84017100	84017351	-	1	ciRNA	-	ENSSSCT00000000926	HSP90B1	mRNA	chr5:84017083-84017351	endoplasmin precursor [Source:RefSeq peptide;Acc:NP_999268]	GO:0070062(extracellular exosome);GO:0048471(perinuclear region of cytoplasm);GO:0034663(endoplasmic reticulum chaperone complex);GO:0031012(extracellular matrix);GO:0030496(midbody);GO:0016020(membrane);GO:0005925(focal adhesion);GO:0005886(plasma membrane);GO:0005829(cytosol);GO:0005789(endoplasmic reticulum membrane);GO:0005788(endoplasmic reticulum lumen);GO:0005783(endoplasmic reticulum);GO:…	NA	ssc-miR-299	m8	-0.231	86	142	-10.65
ciRNA138	chr5	84017100	84017351	-	1	ciRNA	-	ENSSSCT00000000926	HSP90B1	mRNA	chr5:84017083-84017351	endoplasmin precursor [Source:RefSeq peptide;Acc:NP_999268]	GO:0070062(extracellular exosome);GO:0048471(perinuclear region of cytoplasm);GO:0034663(endoplasmic reticulum chaperone complex);GO:0031012(extracellular matrix);GO:0030496(midbody);GO:0016020(membrane);GO:0005925(focal adhesion);GO:0005886(plasma membrane);GO:0005829(cytosol);GO:0005789(endoplasmic reticulum membrane);GO:0005788(endoplasmic reticulum lumen);GO:0005783(endoplasmic reticulum);GO:…	NA	ssc-miR-378	1a	-0.1973	70	140	-20.8
ciRNA138	chr5	84017100	84017351	-	1	ciRNA	-	ENSSSCT00000000926	HSP90B1	mRNA	chr5:84017083-84017351	endoplasmin precursor [Source:RefSeq peptide;Acc:NP_999268]	GO:0070062(extracellular exosome);GO:0048471(perinuclear region of cytoplasm);GO:0034663(endoplasmic reticulum chaperone complex);GO:0031012(extracellular matrix);GO:0030496(midbody);GO:0016020(membrane);GO:0005925(focal adhesion);GO:0005886(plasma membrane);GO:0005829(cytosol);GO:0005789(endoplasmic reticulum membrane);GO:0005788(endoplasmic reticulum lumen);GO:0005783(endoplasmic reticulum);GO:…	NA	ssc-miR-378b-3p	1a	-0.1973	70	140	-19.32
ciRNA138	chr5	84017100	84017351	-	1	ciRNA	-	ENSSSCT00000000926	HSP90B1	mRNA	chr5:84017083-84017351	endoplasmin precursor [Source:RefSeq peptide;Acc:NP_999268]	GO:0070062(extracellular exosome);GO:0048471(perinuclear region of cytoplasm);GO:0034663(endoplasmic reticulum chaperone complex);GO:0031012(extracellular matrix);GO:0030496(midbody);GO:0016020(membrane);GO:0005925(focal adhesion);GO:0005886(plasma membrane);GO:0005829(cytosol);GO:0005789(endoplasmic reticulum membrane);GO:0005788(endoplasmic reticulum lumen);GO:0005783(endoplasmic reticulum);GO:…	NA	ssc-miR-421-5p	8mer	-0.48225	99	162	-11.31
ciRNA138	chr5	84017100	84017351	-	1	ciRNA	-	ENSSSCT00000000926	HSP90B1	mRNA	chr5:84017083-84017351	endoplasmin precursor [Source:RefSeq peptide;Acc:NP_999268]	GO:0070062(extracellular exosome);GO:0048471(perinuclear region of cytoplasm);GO:0034663(endoplasmic reticulum chaperone complex);GO:0031012(extracellular matrix);GO:0030496(midbody);GO:0016020(membrane);GO:0005925(focal adhesion);GO:0005886(plasma membrane);GO:0005829(cytosol);GO:0005789(endoplasmic reticulum membrane);GO:0005788(endoplasmic reticulum lumen);GO:0005783(endoplasmic reticulum);GO:…	NA	ssc-miR-425-5p	m8	-0.197	70	151	-13.53
ciRNA138	chr5	84017100	84017351	-	1	ciRNA	-	ENSSSCT00000000926	HSP90B1	mRNA	chr5:84017083-84017351	endoplasmin precursor [Source:RefSeq peptide;Acc:NP_999268]	GO:0070062(extracellular exosome);GO:0048471(perinuclear region of cytoplasm);GO:0034663(endoplasmic reticulum chaperone complex);GO:0031012(extracellular matrix);GO:0030496(midbody);GO:0016020(membrane);GO:0005925(focal adhesion);GO:0005886(plasma membrane);GO:0005829(cytosol);GO:0005789(endoplasmic reticulum membrane);GO:0005788(endoplasmic reticulum lumen);GO:0005783(endoplasmic reticulum);GO:…	NA	ssc-miR-7137-5p	m8	-0.298	93	145	-13.86
ciRNA139	chr4	121285503	121285766	+	1	ciRNA	-	ENSSSCT00000007482	SORT1	mRNA	chr4:121285502-121285791	sortilin 1 [Source:HGNC Symbol;Acc:HGNC:11186]	GO:0048471(perinuclear region of cytoplasm);GO:0031410(cytoplasmic vesicle);GO:0030659(cytoplasmic vesicle membrane);GO:0030140(trans-Golgi network transport vesicle);GO:0030136(clathrin-coated vesicle);GO:0016021(integral component of membrane);GO:0016020(membrane);GO:0009986(cell surface);GO:0005905(clathrin-coated pit);GO:0005886(plasma membrane);GO:0005829(cytosol);GO:0005794(Golgi apparatus)…	NA	ssc-miR-133a-5p	m8	-0.1245	56	140	-13.92
ciRNA139	chr4	121285503	121285766	+	1	ciRNA	-	ENSSSCT00000007482	SORT1	mRNA	chr4:121285502-121285791	sortilin 1 [Source:HGNC Symbol;Acc:HGNC:11186]	GO:0048471(perinuclear region of cytoplasm);GO:0031410(cytoplasmic vesicle);GO:0030659(cytoplasmic vesicle membrane);GO:0030140(trans-Golgi network transport vesicle);GO:0030136(clathrin-coated vesicle);GO:0016021(integral component of membrane);GO:0016020(membrane);GO:0009986(cell surface);GO:0005905(clathrin-coated pit);GO:0005886(plasma membrane);GO:0005829(cytosol);GO:0005794(Golgi apparatus)…	NA	ssc-miR-148b-5p	m8	-0.1795	57	144	-16.05
ciRNA139	chr4	121285503	121285766	+	1	ciRNA	-	ENSSSCT00000007482	SORT1	mRNA	chr4:121285502-121285791	sortilin 1 [Source:HGNC Symbol;Acc:HGNC:11186]	GO:0048471(perinuclear region of cytoplasm);GO:0031410(cytoplasmic vesicle);GO:0030659(cytoplasmic vesicle membrane);GO:0030140(trans-Golgi network transport vesicle);GO:0030136(clathrin-coated vesicle);GO:0016021(integral component of membrane);GO:0016020(membrane);GO:0009986(cell surface);GO:0005905(clathrin-coated pit);GO:0005886(plasma membrane);GO:0005829(cytosol);GO:0005794(Golgi apparatus)…	NA	ssc-miR-331-3p	8mer	-0.3511	95	140	-17.16
ciRNA139	chr4	121285503	121285766	+	1	ciRNA	-	ENSSSCT00000007482	SORT1	mRNA	chr4:121285502-121285791	sortilin 1 [Source:HGNC Symbol;Acc:HGNC:11186]	GO:0048471(perinuclear region of cytoplasm);GO:0031410(cytoplasmic vesicle);GO:0030659(cytoplasmic vesicle membrane);GO:0030140(trans-Golgi network transport vesicle);GO:0030136(clathrin-coated vesicle);GO:0016021(integral component of membrane);GO:0016020(membrane);GO:0009986(cell surface);GO:0005905(clathrin-coated pit);GO:0005886(plasma membrane);GO:0005829(cytosol);GO:0005794(Golgi apparatus)…	NA	ssc-miR-339-3p	8mer	-0.3793	96	145	-21.09
ciRNA139	chr4	121285503	121285766	+	1	ciRNA	-	ENSSSCT00000007482	SORT1	mRNA	chr4:121285502-121285791	sortilin 1 [Source:HGNC Symbol;Acc:HGNC:11186]	GO:0048471(perinuclear region of cytoplasm);GO:0031410(cytoplasmic vesicle);GO:0030659(cytoplasmic vesicle membrane);GO:0030140(trans-Golgi network transport vesicle);GO:0030136(clathrin-coated vesicle);GO:0016021(integral component of membrane);GO:0016020(membrane);GO:0009986(cell surface);GO:0005905(clathrin-coated pit);GO:0005886(plasma membrane);GO:0005829(cytosol);GO:0005794(Golgi apparatus)…	NA	ssc-miR-542-3p	8mer	-0.34925	91	143	-18.11
ciRNA139	chr4	121285503	121285766	+	1	ciRNA	-	ENSSSCT00000007482	SORT1	mRNA	chr4:121285502-121285791	sortilin 1 [Source:HGNC Symbol;Acc:HGNC:11186]	GO:0048471(perinuclear region of cytoplasm);GO:0031410(cytoplasmic vesicle);GO:0030659(cytoplasmic vesicle membrane);GO:0030140(trans-Golgi network transport vesicle);GO:0030136(clathrin-coated vesicle);GO:0016021(integral component of membrane);GO:0016020(membrane);GO:0009986(cell surface);GO:0005905(clathrin-coated pit);GO:0005886(plasma membrane);GO:0005829(cytosol);GO:0005794(Golgi apparatus)…	NA	ssc-miR-7139-3p	m8	-0.259	90	147	-18.83
ciRNA14	chr1	146922224	146922456	-	1	ciRNA	-	ENSSSCT00000005288	THBS1	mRNA	chr1:146922197-146922456	thrombospondin 1 [Source:HGNC Symbol;Acc:HGNC:11785]	GO:0070062(extracellular exosome);GO:0031091(platelet alpha granule);GO:0031012(extracellular matrix);GO:0030141(secretory granule);GO:0009986(cell surface);GO:0009897(external side of plasma membrane);GO:0005615(extracellular space);GO:0005577(fibrinogen complex);GO:0005576(extracellular region);GO:2001027(negative regulation of endothelial cell chemotaxis);GO:2000379(positive regulation of reac…	04015(Rap1 signaling pathway);04350(TGF-beta signaling pathway);04151(PI3K-Akt signaling pathway);04512(ECM-receptor interaction);04145(Phagosome);04115(p53 signaling pathway);04510(Focal adhesion);05206(MicroRNAs in cancer);05205(Proteoglycans in cancer);05219(Bladder cancer);05144(Malaria)	ssc-miR-9835-3p	m8	-0.1315	52	147	-21.25
ciRNA14	chr1	146922224	146922456	-	1	ciRNA	-	ENSSSCT00000005288	THBS1	mRNA	chr1:146922197-146922456	thrombospondin 1 [Source:HGNC Symbol;Acc:HGNC:11785]	GO:0070062(extracellular exosome);GO:0031091(platelet alpha granule);GO:0031012(extracellular matrix);GO:0030141(secretory granule);GO:0009986(cell surface);GO:0009897(external side of plasma membrane);GO:0005615(extracellular space);GO:0005577(fibrinogen complex);GO:0005576(extracellular region);GO:2001027(negative regulation of endothelial cell chemotaxis);GO:2000379(positive regulation of reac…	04015(Rap1 signaling pathway);04350(TGF-beta signaling pathway);04151(PI3K-Akt signaling pathway);04512(ECM-receptor interaction);04145(Phagosome);04115(p53 signaling pathway);04510(Focal adhesion);05206(MicroRNAs in cancer);05205(Proteoglycans in cancer);05219(Bladder cancer);05144(Malaria)	ssc-miR-9858-5p	m8	-0.147	53	157	-25.73
ciRNA140	chr3	16408486	16409119	+	1	ciRNA	-	ENSSSCT00000008477	SBDS	mRNA	chr3:16408485-16409126	Shwachman-Bodian-Diamond syndrome [Source:HGNC Symbol;Acc:HGNC:19440]	GO:0005829(cytosol);GO:0005737(cytoplasm);GO:0005730(nucleolus);GO:0005634(nucleus);GO:0000922(spindle pole);GO:0048539(bone marrow development);GO:0042256(mature ribosome assembly);GO:0042254(ribosome biogenesis);GO:0030595(leukocyte chemotaxis);GO:0030282(bone mineralization);GO:0008283(cell proliferation);GO:0007052(mitotic spindle organization);GO:0006364(rRNA processing);GO:0001833(inner cel…	03008(Ribosome biogenesis in eukaryotes)	ssc-miR-136	m8	-0.256	78	168	-17.28
ciRNA140	chr3	16408486	16409119	+	1	ciRNA	-	ENSSSCT00000008477	SBDS	mRNA	chr3:16408485-16409126	Shwachman-Bodian-Diamond syndrome [Source:HGNC Symbol;Acc:HGNC:19440]	GO:0005829(cytosol);GO:0005737(cytoplasm);GO:0005730(nucleolus);GO:0005634(nucleus);GO:0000922(spindle pole);GO:0048539(bone marrow development);GO:0042256(mature ribosome assembly);GO:0042254(ribosome biogenesis);GO:0030595(leukocyte chemotaxis);GO:0030282(bone mineralization);GO:0008283(cell proliferation);GO:0007052(mitotic spindle organization);GO:0006364(rRNA processing);GO:0001833(inner cel…	03008(Ribosome biogenesis in eukaryotes)	ssc-miR-146a-5p	8mer	-0.3522	94	149	-17.57
ciRNA140	chr3	16408486	16409119	+	1	ciRNA	-	ENSSSCT00000008477	SBDS	mRNA	chr3:16408485-16409126	Shwachman-Bodian-Diamond syndrome [Source:HGNC Symbol;Acc:HGNC:19440]	GO:0005829(cytosol);GO:0005737(cytoplasm);GO:0005730(nucleolus);GO:0005634(nucleus);GO:0000922(spindle pole);GO:0048539(bone marrow development);GO:0042256(mature ribosome assembly);GO:0042254(ribosome biogenesis);GO:0030595(leukocyte chemotaxis);GO:0030282(bone mineralization);GO:0008283(cell proliferation);GO:0007052(mitotic spindle organization);GO:0006364(rRNA processing);GO:0001833(inner cel…	03008(Ribosome biogenesis in eukaryotes)	ssc-miR-146b	8mer	-0.3522	94	149	-15.87
ciRNA140	chr3	16408486	16409119	+	1	ciRNA	-	ENSSSCT00000008477	SBDS	mRNA	chr3:16408485-16409126	Shwachman-Bodian-Diamond syndrome [Source:HGNC Symbol;Acc:HGNC:19440]	GO:0005829(cytosol);GO:0005737(cytoplasm);GO:0005730(nucleolus);GO:0005634(nucleus);GO:0000922(spindle pole);GO:0048539(bone marrow development);GO:0042256(mature ribosome assembly);GO:0042254(ribosome biogenesis);GO:0030595(leukocyte chemotaxis);GO:0030282(bone mineralization);GO:0008283(cell proliferation);GO:0007052(mitotic spindle organization);GO:0006364(rRNA processing);GO:0001833(inner cel…	03008(Ribosome biogenesis in eukaryotes)	ssc-miR-185	m8	-0.281	88	157	-21.49
ciRNA140	chr3	16408486	16409119	+	1	ciRNA	-	ENSSSCT00000008477	SBDS	mRNA	chr3:16408485-16409126	Shwachman-Bodian-Diamond syndrome [Source:HGNC Symbol;Acc:HGNC:19440]	GO:0005829(cytosol);GO:0005737(cytoplasm);GO:0005730(nucleolus);GO:0005634(nucleus);GO:0000922(spindle pole);GO:0048539(bone marrow development);GO:0042256(mature ribosome assembly);GO:0042254(ribosome biogenesis);GO:0030595(leukocyte chemotaxis);GO:0030282(bone mineralization);GO:0008283(cell proliferation);GO:0007052(mitotic spindle organization);GO:0006364(rRNA processing);GO:0001833(inner cel…	03008(Ribosome biogenesis in eukaryotes)	ssc-miR-214	m8	-0.177	69	147	-15.42
ciRNA140	chr3	16408486	16409119	+	1	ciRNA	-	ENSSSCT00000008477	SBDS	mRNA	chr3:16408485-16409126	Shwachman-Bodian-Diamond syndrome [Source:HGNC Symbol;Acc:HGNC:19440]	GO:0005829(cytosol);GO:0005737(cytoplasm);GO:0005730(nucleolus);GO:0005634(nucleus);GO:0000922(spindle pole);GO:0048539(bone marrow development);GO:0042256(mature ribosome assembly);GO:0042254(ribosome biogenesis);GO:0030595(leukocyte chemotaxis);GO:0030282(bone mineralization);GO:0008283(cell proliferation);GO:0007052(mitotic spindle organization);GO:0006364(rRNA processing);GO:0001833(inner cel…	03008(Ribosome biogenesis in eukaryotes)	ssc-miR-23a	8mer	-0.43925	96	141	-13.16
ciRNA140	chr3	16408486	16409119	+	1	ciRNA	-	ENSSSCT00000008477	SBDS	mRNA	chr3:16408485-16409126	Shwachman-Bodian-Diamond syndrome [Source:HGNC Symbol;Acc:HGNC:19440]	GO:0005829(cytosol);GO:0005737(cytoplasm);GO:0005730(nucleolus);GO:0005634(nucleus);GO:0000922(spindle pole);GO:0048539(bone marrow development);GO:0042256(mature ribosome assembly);GO:0042254(ribosome biogenesis);GO:0030595(leukocyte chemotaxis);GO:0030282(bone mineralization);GO:0008283(cell proliferation);GO:0007052(mitotic spindle organization);GO:0006364(rRNA processing);GO:0001833(inner cel…	03008(Ribosome biogenesis in eukaryotes)	ssc-miR-23b	8mer	-0.43925	96	141	-14.42
ciRNA140	chr3	16408486	16409119	+	1	ciRNA	-	ENSSSCT00000008477	SBDS	mRNA	chr3:16408485-16409126	Shwachman-Bodian-Diamond syndrome [Source:HGNC Symbol;Acc:HGNC:19440]	GO:0005829(cytosol);GO:0005737(cytoplasm);GO:0005730(nucleolus);GO:0005634(nucleus);GO:0000922(spindle pole);GO:0048539(bone marrow development);GO:0042256(mature ribosome assembly);GO:0042254(ribosome biogenesis);GO:0030595(leukocyte chemotaxis);GO:0030282(bone mineralization);GO:0008283(cell proliferation);GO:0007052(mitotic spindle organization);GO:0006364(rRNA processing);GO:0001833(inner cel…	03008(Ribosome biogenesis in eukaryotes)	ssc-miR-450b-5p	8mer	-0.39825	94	148	-10.07
ciRNA140	chr3	16408486	16409119	+	1	ciRNA	-	ENSSSCT00000008477	SBDS	mRNA	chr3:16408485-16409126	Shwachman-Bodian-Diamond syndrome [Source:HGNC Symbol;Acc:HGNC:19440]	GO:0005829(cytosol);GO:0005737(cytoplasm);GO:0005730(nucleolus);GO:0005634(nucleus);GO:0000922(spindle pole);GO:0048539(bone marrow development);GO:0042256(mature ribosome assembly);GO:0042254(ribosome biogenesis);GO:0030595(leukocyte chemotaxis);GO:0030282(bone mineralization);GO:0008283(cell proliferation);GO:0007052(mitotic spindle organization);GO:0006364(rRNA processing);GO:0001833(inner cel…	03008(Ribosome biogenesis in eukaryotes)	ssc-miR-489	8mer	-0.2993	89	157	-15.84
ciRNA140	chr3	16408486	16409119	+	1	ciRNA	-	ENSSSCT00000008477	SBDS	mRNA	chr3:16408485-16409126	Shwachman-Bodian-Diamond syndrome [Source:HGNC Symbol;Acc:HGNC:19440]	GO:0005829(cytosol);GO:0005737(cytoplasm);GO:0005730(nucleolus);GO:0005634(nucleus);GO:0000922(spindle pole);GO:0048539(bone marrow development);GO:0042256(mature ribosome assembly);GO:0042254(ribosome biogenesis);GO:0030595(leukocyte chemotaxis);GO:0030282(bone mineralization);GO:0008283(cell proliferation);GO:0007052(mitotic spindle organization);GO:0006364(rRNA processing);GO:0001833(inner cel…	03008(Ribosome biogenesis in eukaryotes)	ssc-miR-7	8mer	-0.36325	95	166	-24.14
ciRNA140	chr3	16408486	16409119	+	1	ciRNA	-	ENSSSCT00000008477	SBDS	mRNA	chr3:16408485-16409126	Shwachman-Bodian-Diamond syndrome [Source:HGNC Symbol;Acc:HGNC:19440]	GO:0005829(cytosol);GO:0005737(cytoplasm);GO:0005730(nucleolus);GO:0005634(nucleus);GO:0000922(spindle pole);GO:0048539(bone marrow development);GO:0042256(mature ribosome assembly);GO:0042254(ribosome biogenesis);GO:0030595(leukocyte chemotaxis);GO:0030282(bone mineralization);GO:0008283(cell proliferation);GO:0007052(mitotic spindle organization);GO:0006364(rRNA processing);GO:0001833(inner cel…	03008(Ribosome biogenesis in eukaryotes)	ssc-miR-7138-5p	m8	-0.181	66	151	-16.6
ciRNA140	chr3	16408486	16409119	+	1	ciRNA	-	ENSSSCT00000008477	SBDS	mRNA	chr3:16408485-16409126	Shwachman-Bodian-Diamond syndrome [Source:HGNC Symbol;Acc:HGNC:19440]	GO:0005829(cytosol);GO:0005737(cytoplasm);GO:0005730(nucleolus);GO:0005634(nucleus);GO:0000922(spindle pole);GO:0048539(bone marrow development);GO:0042256(mature ribosome assembly);GO:0042254(ribosome biogenesis);GO:0030595(leukocyte chemotaxis);GO:0030282(bone mineralization);GO:0008283(cell proliferation);GO:0007052(mitotic spindle organization);GO:0006364(rRNA processing);GO:0001833(inner cel…	03008(Ribosome biogenesis in eukaryotes)	ssc-miR-885-3p	1a	-0.1112	59	140	-17.21
ciRNA140	chr3	16408486	16409119	+	1	ciRNA	-	ENSSSCT00000008477	SBDS	mRNA	chr3:16408485-16409126	Shwachman-Bodian-Diamond syndrome [Source:HGNC Symbol;Acc:HGNC:19440]	GO:0005829(cytosol);GO:0005737(cytoplasm);GO:0005730(nucleolus);GO:0005634(nucleus);GO:0000922(spindle pole);GO:0048539(bone marrow development);GO:0042256(mature ribosome assembly);GO:0042254(ribosome biogenesis);GO:0030595(leukocyte chemotaxis);GO:0030282(bone mineralization);GO:0008283(cell proliferation);GO:0007052(mitotic spindle organization);GO:0006364(rRNA processing);GO:0001833(inner cel…	03008(Ribosome biogenesis in eukaryotes)	ssc-miR-9787-3p	m8	-0.205	76	142	-17.69
ciRNA140	chr3	16408486	16409119	+	1	ciRNA	-	ENSSSCT00000008477	SBDS	mRNA	chr3:16408485-16409126	Shwachman-Bodian-Diamond syndrome [Source:HGNC Symbol;Acc:HGNC:19440]	GO:0005829(cytosol);GO:0005737(cytoplasm);GO:0005730(nucleolus);GO:0005634(nucleus);GO:0000922(spindle pole);GO:0048539(bone marrow development);GO:0042256(mature ribosome assembly);GO:0042254(ribosome biogenesis);GO:0030595(leukocyte chemotaxis);GO:0030282(bone mineralization);GO:0008283(cell proliferation);GO:0007052(mitotic spindle organization);GO:0006364(rRNA processing);GO:0001833(inner cel…	03008(Ribosome biogenesis in eukaryotes)	ssc-miR-9817-5p	m8	-0.1845	54	157	-10.58
ciRNA140	chr3	16408486	16409119	+	1	ciRNA	-	ENSSSCT00000008477	SBDS	mRNA	chr3:16408485-16409126	Shwachman-Bodian-Diamond syndrome [Source:HGNC Symbol;Acc:HGNC:19440]	GO:0005829(cytosol);GO:0005737(cytoplasm);GO:0005730(nucleolus);GO:0005634(nucleus);GO:0000922(spindle pole);GO:0048539(bone marrow development);GO:0042256(mature ribosome assembly);GO:0042254(ribosome biogenesis);GO:0030595(leukocyte chemotaxis);GO:0030282(bone mineralization);GO:0008283(cell proliferation);GO:0007052(mitotic spindle organization);GO:0006364(rRNA processing);GO:0001833(inner cel…	03008(Ribosome biogenesis in eukaryotes)	ssc-miR-9852-3p	m8	-0.104	56	149	-24.22
ciRNA141	chr3	58279371	58279606	-	1	ciRNA	-	ENSSSCT00000008969	INPP4A	mRNA	chr3:58279329-58279606	type I inositol-3,4-bisphosphate 4-phosphatase [Source:RefSeq peptide;Acc:NP_001137402]	GO:0005737(cytoplasm);GO:0036092(phosphatidylinositol-3-phosphate biosynthetic process);GO:0007165(signal transduction);GO:0016316(phosphatidylinositol-3,4-bisphosphate 4-phosphatase activity)	00562(Inositol phosphate metabolism);04070(Phosphatidylinositol signaling system)	ssc-miR-328	m8	-0.112	50	154	-28.97
ciRNA141	chr3	58279371	58279606	-	1	ciRNA	-	ENSSSCT00000008969	INPP4A	mRNA	chr3:58279329-58279606	type I inositol-3,4-bisphosphate 4-phosphatase [Source:RefSeq peptide;Acc:NP_001137402]	GO:0005737(cytoplasm);GO:0036092(phosphatidylinositol-3-phosphate biosynthetic process);GO:0007165(signal transduction);GO:0016316(phosphatidylinositol-3,4-bisphosphate 4-phosphatase activity)	00562(Inositol phosphate metabolism);04070(Phosphatidylinositol signaling system)	ssc-miR-9854-5p	m8	-0.151	75	148	-15.16
ciRNA142	chr2	2781912	2782117	+	1	ciRNA	-	ENSSSCT00000014077	MRPL21	mRNA	chr2:2781911-2784123	mitochondrial ribosomal protein L21 [Source:HGNC Symbol;Acc:HGNC:14479]	GO:0005840(ribosome);GO:0005762(mitochondrial large ribosomal subunit);GO:0005739(mitochondrion);GO:0005622(intracellular);GO:0006412(translation);GO:0003735(structural constituent of ribosome);GO:0003723(RNA binding)	NA	ssc-miR-504	8mer	-0.14425	54	146	-17.94
ciRNA142	chr2	2781912	2782117	+	1	ciRNA	-	ENSSSCT00000014077	MRPL21	mRNA	chr2:2781911-2784123	mitochondrial ribosomal protein L21 [Source:HGNC Symbol;Acc:HGNC:14479]	GO:0005840(ribosome);GO:0005762(mitochondrial large ribosomal subunit);GO:0005739(mitochondrion);GO:0005622(intracellular);GO:0006412(translation);GO:0003735(structural constituent of ribosome);GO:0003723(RNA binding)	NA	ssc-miR-744	m8	-0.1855	86	172	-35.17
ciRNA143	chr2	8279617	8279769	+	1	ciRNA	-	ENSSSCT00000027556	WDR74	mRNA	chr2:8279616-8280525	WD repeat domain 74 [Source:HGNC Symbol;Acc:HGNC:25529]	GO:0030687(preribosome, large subunit precursor);GO:0005730(nucleolus);GO:0005634(nucleus);GO:0042273(ribosomal large subunit biogenesis)	NA	ssc-miR-150	8mer	-0.28425	90	147	-18.77
ciRNA143	chr2	8279617	8279769	+	1	ciRNA	-	ENSSSCT00000027556	WDR74	mRNA	chr2:8279616-8280525	WD repeat domain 74 [Source:HGNC Symbol;Acc:HGNC:25529]	GO:0030687(preribosome, large subunit precursor);GO:0005730(nucleolus);GO:0005634(nucleus);GO:0042273(ribosomal large subunit biogenesis)	NA	ssc-miR-320	m8	-0.2015	67	147	-18.47
ciRNA143	chr2	8279617	8279769	+	1	ciRNA	-	ENSSSCT00000027556	WDR74	mRNA	chr2:8279616-8280525	WD repeat domain 74 [Source:HGNC Symbol;Acc:HGNC:25529]	GO:0030687(preribosome, large subunit precursor);GO:0005730(nucleolus);GO:0005634(nucleus);GO:0042273(ribosomal large subunit biogenesis)	NA	ssc-miR-383	m8	-0.286	89	152	-15.5
ciRNA143	chr2	8279617	8279769	+	1	ciRNA	-	ENSSSCT00000027556	WDR74	mRNA	chr2:8279616-8280525	WD repeat domain 74 [Source:HGNC Symbol;Acc:HGNC:25529]	GO:0030687(preribosome, large subunit precursor);GO:0005730(nucleolus);GO:0005634(nucleus);GO:0042273(ribosomal large subunit biogenesis)	NA	ssc-miR-9835-3p	m8	-0.167	67	161	-24.27
ciRNA144	chr2	16501299	16501843	+	1	ciRNA	-	ENSSSCT00000029405	ENSSSCG00000025402	mRNA	chr2:16501298-16502143	NA	GO:0043547(positive regulation of GTPase activity);GO:0017112(Rab guanyl-nucleotide exchange factor activity)	NA	ssc-miR-138	m8	-0.204	75	140	-12.94
ciRNA144	chr2	16501299	16501843	+	1	ciRNA	-	ENSSSCT00000029405	ENSSSCG00000025402	mRNA	chr2:16501298-16502143	NA	GO:0043547(positive regulation of GTPase activity);GO:0017112(Rab guanyl-nucleotide exchange factor activity)	NA	ssc-miR-193a-5p	m8	-0.178	76	165	-23.97
ciRNA144	chr2	16501299	16501843	+	1	ciRNA	-	ENSSSCT00000029405	ENSSSCG00000025402	mRNA	chr2:16501298-16502143	NA	GO:0043547(positive regulation of GTPase activity);GO:0017112(Rab guanyl-nucleotide exchange factor activity)	NA	ssc-miR-214	8mer	-0.3362	93	145	-17.11
ciRNA144	chr2	16501299	16501843	+	1	ciRNA	-	ENSSSCT00000029405	ENSSSCG00000025402	mRNA	chr2:16501298-16502143	NA	GO:0043547(positive regulation of GTPase activity);GO:0017112(Rab guanyl-nucleotide exchange factor activity)	NA	ssc-miR-224	8mer	-0.47725	99	152	-11.21
ciRNA144	chr2	16501299	16501843	+	1	ciRNA	-	ENSSSCT00000029405	ENSSSCG00000025402	mRNA	chr2:16501298-16502143	NA	GO:0043547(positive regulation of GTPase activity);GO:0017112(Rab guanyl-nucleotide exchange factor activity)	NA	ssc-miR-24-3p	m8	-0.15	65	149	-17.34
ciRNA144	chr2	16501299	16501843	+	1	ciRNA	-	ENSSSCT00000029405	ENSSSCG00000025402	mRNA	chr2:16501298-16502143	NA	GO:0043547(positive regulation of GTPase activity);GO:0017112(Rab guanyl-nucleotide exchange factor activity)	NA	ssc-miR-365-3p	m8	-0.28	90	153	-17.5
ciRNA144	chr2	16501299	16501843	+	1	ciRNA	-	ENSSSCT00000029405	ENSSSCG00000025402	mRNA	chr2:16501298-16502143	NA	GO:0043547(positive regulation of GTPase activity);GO:0017112(Rab guanyl-nucleotide exchange factor activity)	NA	ssc-miR-4331	8mer	-0.28245	88	188	-42.64
ciRNA144	chr2	16501299	16501843	+	1	ciRNA	-	ENSSSCT00000029405	ENSSSCG00000025402	mRNA	chr2:16501298-16502143	NA	GO:0043547(positive regulation of GTPase activity);GO:0017112(Rab guanyl-nucleotide exchange factor activity)	NA	ssc-miR-450b-3p	8mer	-0.39125	96	153	-19.1
ciRNA144	chr2	16501299	16501843	+	1	ciRNA	-	ENSSSCT00000029405	ENSSSCG00000025402	mRNA	chr2:16501298-16502143	NA	GO:0043547(positive regulation of GTPase activity);GO:0017112(Rab guanyl-nucleotide exchange factor activity)	NA	ssc-miR-450c-3p	m8	-0.1485	53	158	-18.34
ciRNA144	chr2	16501299	16501843	+	1	ciRNA	-	ENSSSCT00000029405	ENSSSCG00000025402	mRNA	chr2:16501298-16502143	NA	GO:0043547(positive regulation of GTPase activity);GO:0017112(Rab guanyl-nucleotide exchange factor activity)	NA	ssc-miR-7	m8	-0.279	89	144	-14.13
ciRNA144	chr2	16501299	16501843	+	1	ciRNA	-	ENSSSCT00000029405	ENSSSCG00000025402	mRNA	chr2:16501298-16502143	NA	GO:0043547(positive regulation of GTPase activity);GO:0017112(Rab guanyl-nucleotide exchange factor activity)	NA	ssc-miR-9794-3p	m8	-0.2825	86	154	-15.92
ciRNA144	chr2	16501299	16501843	+	1	ciRNA	-	ENSSSCT00000029405	ENSSSCG00000025402	mRNA	chr2:16501298-16502143	NA	GO:0043547(positive regulation of GTPase activity);GO:0017112(Rab guanyl-nucleotide exchange factor activity)	NA	ssc-miR-9805-3p	8mer	-0.2962	90	140	-17.76
ciRNA144	chr2	16501299	16501843	+	1	ciRNA	-	ENSSSCT00000029405	ENSSSCG00000025402	mRNA	chr2:16501298-16502143	NA	GO:0043547(positive regulation of GTPase activity);GO:0017112(Rab guanyl-nucleotide exchange factor activity)	NA	ssc-miR-9820-5p	m8	-0.1845	72	156	-27.27
ciRNA144	chr2	16501299	16501843	+	1	ciRNA	-	ENSSSCT00000029405	ENSSSCG00000025402	mRNA	chr2:16501298-16502143	NA	GO:0043547(positive regulation of GTPase activity);GO:0017112(Rab guanyl-nucleotide exchange factor activity)	NA	ssc-miR-9836-3p	8mer	-0.43215	95	146	-11.12
ciRNA145	chr2	59462696	59463334	-	1	ciRNA	-	ENSSSCT00000015175	RPL18A	mRNA	chr2:59462692-59463334	ribosomal protein L18a [Source:HGNC Symbol;Acc:HGNC:10311]	GO:0022625(cytosolic large ribosomal subunit);GO:0016020(membrane);GO:0005840(ribosome);GO:0006412(translation);GO:0003735(structural constituent of ribosome);GO:0003723(RNA binding)	NA	ssc-miR-122	m8	-0.181	70	141	-13.94
ciRNA145	chr2	59462696	59463334	-	1	ciRNA	-	ENSSSCT00000015175	RPL18A	mRNA	chr2:59462692-59463334	ribosomal protein L18a [Source:HGNC Symbol;Acc:HGNC:10311]	GO:0022625(cytosolic large ribosomal subunit);GO:0016020(membrane);GO:0005840(ribosome);GO:0006412(translation);GO:0003735(structural constituent of ribosome);GO:0003723(RNA binding)	NA	ssc-miR-17-3p	m8	-0.182	74	140	-12.74
ciRNA145	chr2	59462696	59463334	-	1	ciRNA	-	ENSSSCT00000015175	RPL18A	mRNA	chr2:59462692-59463334	ribosomal protein L18a [Source:HGNC Symbol;Acc:HGNC:10311]	GO:0022625(cytosolic large ribosomal subunit);GO:0016020(membrane);GO:0005840(ribosome);GO:0006412(translation);GO:0003735(structural constituent of ribosome);GO:0003723(RNA binding)	NA	ssc-miR-221-5p	8mer	-0.2182	77	141	-20.4
ciRNA145	chr2	59462696	59463334	-	1	ciRNA	-	ENSSSCT00000015175	RPL18A	mRNA	chr2:59462692-59463334	ribosomal protein L18a [Source:HGNC Symbol;Acc:HGNC:10311]	GO:0022625(cytosolic large ribosomal subunit);GO:0016020(membrane);GO:0005840(ribosome);GO:0006412(translation);GO:0003735(structural constituent of ribosome);GO:0003723(RNA binding)	NA	ssc-miR-29a	8mer	-0.4302	94	152	-15.53
ciRNA145	chr2	59462696	59463334	-	1	ciRNA	-	ENSSSCT00000015175	RPL18A	mRNA	chr2:59462692-59463334	ribosomal protein L18a [Source:HGNC Symbol;Acc:HGNC:10311]	GO:0022625(cytosolic large ribosomal subunit);GO:0016020(membrane);GO:0005840(ribosome);GO:0006412(translation);GO:0003735(structural constituent of ribosome);GO:0003723(RNA binding)	NA	ssc-miR-30d	m8	-0.152	54	164	-23.51
ciRNA145	chr2	59462696	59463334	-	1	ciRNA	-	ENSSSCT00000015175	RPL18A	mRNA	chr2:59462692-59463334	ribosomal protein L18a [Source:HGNC Symbol;Acc:HGNC:10311]	GO:0022625(cytosolic large ribosomal subunit);GO:0016020(membrane);GO:0005840(ribosome);GO:0006412(translation);GO:0003735(structural constituent of ribosome);GO:0003723(RNA binding)	NA	ssc-miR-370	m8	-0.176	70	148	-22.25
ciRNA145	chr2	59462696	59463334	-	1	ciRNA	-	ENSSSCT00000015175	RPL18A	mRNA	chr2:59462692-59463334	ribosomal protein L18a [Source:HGNC Symbol;Acc:HGNC:10311]	GO:0022625(cytosolic large ribosomal subunit);GO:0016020(membrane);GO:0005840(ribosome);GO:0006412(translation);GO:0003735(structural constituent of ribosome);GO:0003723(RNA binding)	NA	ssc-miR-505	8mer	-0.2023	73	153	-17.83
ciRNA145	chr2	59462696	59463334	-	1	ciRNA	-	ENSSSCT00000015175	RPL18A	mRNA	chr2:59462692-59463334	ribosomal protein L18a [Source:HGNC Symbol;Acc:HGNC:10311]	GO:0022625(cytosolic large ribosomal subunit);GO:0016020(membrane);GO:0005840(ribosome);GO:0006412(translation);GO:0003735(structural constituent of ribosome);GO:0003723(RNA binding)	NA	ssc-miR-7139-3p	m8	-0.165	63	156	-21.44
ciRNA145	chr2	59462696	59463334	-	1	ciRNA	-	ENSSSCT00000015175	RPL18A	mRNA	chr2:59462692-59463334	ribosomal protein L18a [Source:HGNC Symbol;Acc:HGNC:10311]	GO:0022625(cytosolic large ribosomal subunit);GO:0016020(membrane);GO:0005840(ribosome);GO:0006412(translation);GO:0003735(structural constituent of ribosome);GO:0003723(RNA binding)	NA	ssc-miR-874	8mer	-0.2931	94	149	-25.43
ciRNA145	chr2	59462696	59463334	-	1	ciRNA	-	ENSSSCT00000015175	RPL18A	mRNA	chr2:59462692-59463334	ribosomal protein L18a [Source:HGNC Symbol;Acc:HGNC:10311]	GO:0022625(cytosolic large ribosomal subunit);GO:0016020(membrane);GO:0005840(ribosome);GO:0006412(translation);GO:0003735(structural constituent of ribosome);GO:0003723(RNA binding)	NA	ssc-miR-9835-3p	m8	-0.151	60	142	-17.29
ciRNA145	chr2	59462696	59463334	-	1	ciRNA	-	ENSSSCT00000015175	RPL18A	mRNA	chr2:59462692-59463334	ribosomal protein L18a [Source:HGNC Symbol;Acc:HGNC:10311]	GO:0022625(cytosolic large ribosomal subunit);GO:0016020(membrane);GO:0005840(ribosome);GO:0006412(translation);GO:0003735(structural constituent of ribosome);GO:0003723(RNA binding)	NA	ssc-miR-9841-3p	8mer	-0.3202	92	143	-21.43
ciRNA146	chr2	60664230	60664462	+	1	ciRNA	-	ENSSSCT00000015139	CHERP	mRNA	chr2:60664229-60664508	calcium homeostasis endoplasmic reticulum protein [Source:HGNC Symbol;Acc:HGNC:16930]	GO:0048471(perinuclear region of cytoplasm);GO:0016020(membrane);GO:0005737(cytoplasm);GO:0051533(positive regulation of NFAT protein import into nucleus);GO:0051209(release of sequestered calcium ion into cytosol);GO:0008285(negative regulation of cell proliferation);GO:0006874(cellular calcium ion homeostasis);GO:0006396(RNA processing);GO:0044325(ion channel binding);GO:0003723(RNA binding);GO…	NA	ssc-miR-133b	8mer	-0.3762	91	145	-13.38
ciRNA146	chr2	60664230	60664462	+	1	ciRNA	-	ENSSSCT00000015139	CHERP	mRNA	chr2:60664229-60664508	calcium homeostasis endoplasmic reticulum protein [Source:HGNC Symbol;Acc:HGNC:16930]	GO:0048471(perinuclear region of cytoplasm);GO:0016020(membrane);GO:0005737(cytoplasm);GO:0051533(positive regulation of NFAT protein import into nucleus);GO:0051209(release of sequestered calcium ion into cytosol);GO:0008285(negative regulation of cell proliferation);GO:0006874(cellular calcium ion homeostasis);GO:0006396(RNA processing);GO:0044325(ion channel binding);GO:0003723(RNA binding);GO…	NA	ssc-miR-345-5p	8mer	-0.3033	91	150	-23.38
ciRNA146	chr2	60664230	60664462	+	1	ciRNA	-	ENSSSCT00000015139	CHERP	mRNA	chr2:60664229-60664508	calcium homeostasis endoplasmic reticulum protein [Source:HGNC Symbol;Acc:HGNC:16930]	GO:0048471(perinuclear region of cytoplasm);GO:0016020(membrane);GO:0005737(cytoplasm);GO:0051533(positive regulation of NFAT protein import into nucleus);GO:0051209(release of sequestered calcium ion into cytosol);GO:0008285(negative regulation of cell proliferation);GO:0006874(cellular calcium ion homeostasis);GO:0006396(RNA processing);GO:0044325(ion channel binding);GO:0003723(RNA binding);GO…	NA	ssc-miR-452	m8	-0.168	57	145	-10.95
ciRNA146	chr2	60664230	60664462	+	1	ciRNA	-	ENSSSCT00000015139	CHERP	mRNA	chr2:60664229-60664508	calcium homeostasis endoplasmic reticulum protein [Source:HGNC Symbol;Acc:HGNC:16930]	GO:0048471(perinuclear region of cytoplasm);GO:0016020(membrane);GO:0005737(cytoplasm);GO:0051533(positive regulation of NFAT protein import into nucleus);GO:0051209(release of sequestered calcium ion into cytosol);GO:0008285(negative regulation of cell proliferation);GO:0006874(cellular calcium ion homeostasis);GO:0006396(RNA processing);GO:0044325(ion channel binding);GO:0003723(RNA binding);GO…	NA	ssc-miR-491	8mer	-0.26525	81	142	-20.22
ciRNA146	chr2	60664230	60664462	+	1	ciRNA	-	ENSSSCT00000015139	CHERP	mRNA	chr2:60664229-60664508	calcium homeostasis endoplasmic reticulum protein [Source:HGNC Symbol;Acc:HGNC:16930]	GO:0048471(perinuclear region of cytoplasm);GO:0016020(membrane);GO:0005737(cytoplasm);GO:0051533(positive regulation of NFAT protein import into nucleus);GO:0051209(release of sequestered calcium ion into cytosol);GO:0008285(negative regulation of cell proliferation);GO:0006874(cellular calcium ion homeostasis);GO:0006396(RNA processing);GO:0044325(ion channel binding);GO:0003723(RNA binding);GO…	NA	ssc-miR-499-5p	m8	-0.2415	78	147	-11.44
ciRNA146	chr2	60664230	60664462	+	1	ciRNA	-	ENSSSCT00000015139	CHERP	mRNA	chr2:60664229-60664508	calcium homeostasis endoplasmic reticulum protein [Source:HGNC Symbol;Acc:HGNC:16930]	GO:0048471(perinuclear region of cytoplasm);GO:0016020(membrane);GO:0005737(cytoplasm);GO:0051533(positive regulation of NFAT protein import into nucleus);GO:0051209(release of sequestered calcium ion into cytosol);GO:0008285(negative regulation of cell proliferation);GO:0006874(cellular calcium ion homeostasis);GO:0006396(RNA processing);GO:0044325(ion channel binding);GO:0003723(RNA binding);GO…	NA	ssc-miR-9840-3p	8mer	-0.3842	93	141	-19.01
ciRNA147	chr1	9361455	9361743	-	1	ciRNA	-	ENSSSCT00000004474	PNLDC1	mRNA	chr1:9361435-9361743	PARN like, ribonuclease domain containing 1 [Source:HGNC Symbol;Acc:HGNC:21185]	GO:0005783(endoplasmic reticulum);GO:0090503(RNA phosphodiester bond hydrolysis, exonucleolytic);GO:0000289(nuclear-transcribed mRNA poly(A) tail shortening);GO:0004535(poly(A)-specific ribonuclease activity);GO:0003676(nucleic acid binding)	NA	ssc-miR-221-5p	8mer	-0.27515	85	149	-16.21
ciRNA148	chr1	264044238	264044422	+	1	ciRNA	-	ENSSSCT00000005846	RUSC2	mRNA	chr1:264044237-264044447	RUN and SH3 domain containing 2 [Source:HGNC Symbol;Acc:HGNC:23625]	GO:0070062(extracellular exosome);GO:0031410(cytoplasmic vesicle);GO:0017137(Rab GTPase binding)	NA	ssc-miR-133b	m8	-0.156	52	148	-17.52
ciRNA148	chr1	264044238	264044422	+	1	ciRNA	-	ENSSSCT00000005846	RUSC2	mRNA	chr1:264044237-264044447	RUN and SH3 domain containing 2 [Source:HGNC Symbol;Acc:HGNC:23625]	GO:0070062(extracellular exosome);GO:0031410(cytoplasmic vesicle);GO:0017137(Rab GTPase binding)	NA	ssc-miR-136	m8	-0.1875	65	177	-20.5
ciRNA148	chr1	264044238	264044422	+	1	ciRNA	-	ENSSSCT00000005846	RUSC2	mRNA	chr1:264044237-264044447	RUN and SH3 domain containing 2 [Source:HGNC Symbol;Acc:HGNC:23625]	GO:0070062(extracellular exosome);GO:0031410(cytoplasmic vesicle);GO:0017137(Rab GTPase binding)	NA	ssc-miR-149	8mer	-0.35345	95	165	-26.16
ciRNA148	chr1	264044238	264044422	+	1	ciRNA	-	ENSSSCT00000005846	RUSC2	mRNA	chr1:264044237-264044447	RUN and SH3 domain containing 2 [Source:HGNC Symbol;Acc:HGNC:23625]	GO:0070062(extracellular exosome);GO:0031410(cytoplasmic vesicle);GO:0017137(Rab GTPase binding)	NA	ssc-miR-214	8mer	-0.39325	96	143	-18.81
ciRNA148	chr1	264044238	264044422	+	1	ciRNA	-	ENSSSCT00000005846	RUSC2	mRNA	chr1:264044237-264044447	RUN and SH3 domain containing 2 [Source:HGNC Symbol;Acc:HGNC:23625]	GO:0070062(extracellular exosome);GO:0031410(cytoplasmic vesicle);GO:0017137(Rab GTPase binding)	NA	ssc-miR-4339	m8	-0.152	61	150	-16.79
ciRNA148	chr1	264044238	264044422	+	1	ciRNA	-	ENSSSCT00000005846	RUSC2	mRNA	chr1:264044237-264044447	RUN and SH3 domain containing 2 [Source:HGNC Symbol;Acc:HGNC:23625]	GO:0070062(extracellular exosome);GO:0031410(cytoplasmic vesicle);GO:0017137(Rab GTPase binding)	NA	ssc-miR-493-3p	m8	-0.144	51	142	-14.66
ciRNA148	chr1	264044238	264044422	+	1	ciRNA	-	ENSSSCT00000005846	RUSC2	mRNA	chr1:264044237-264044447	RUN and SH3 domain containing 2 [Source:HGNC Symbol;Acc:HGNC:23625]	GO:0070062(extracellular exosome);GO:0031410(cytoplasmic vesicle);GO:0017137(Rab GTPase binding)	NA	ssc-miR-7135-5p	m8	-0.1675	63	157	-17.41
ciRNA148	chr1	264044238	264044422	+	1	ciRNA	-	ENSSSCT00000005846	RUSC2	mRNA	chr1:264044237-264044447	RUN and SH3 domain containing 2 [Source:HGNC Symbol;Acc:HGNC:23625]	GO:0070062(extracellular exosome);GO:0031410(cytoplasmic vesicle);GO:0017137(Rab GTPase binding)	NA	ssc-miR-7143-5p	m8	-0.2165	80	148	-18.59
ciRNA148	chr1	264044238	264044422	+	1	ciRNA	-	ENSSSCT00000005846	RUSC2	mRNA	chr1:264044237-264044447	RUN and SH3 domain containing 2 [Source:HGNC Symbol;Acc:HGNC:23625]	GO:0070062(extracellular exosome);GO:0031410(cytoplasmic vesicle);GO:0017137(Rab GTPase binding)	NA	ssc-miR-9813-5p	m8	-0.1275	54	160	-23.2
ciRNA149	chr1	264111965	264112200	-	1	ciRNA	-	ENSSSCT00000005852	ARHGEF39	mRNA	chr1:264111930-264112200	Rho guanine nucleotide exchange factor 39 [Source:HGNC Symbol;Acc:HGNC:25909]	GO:0005886(plasma membrane);GO:0043547(positive regulation of GTPase activity);GO:0035023(regulation of Rho protein signal transduction);GO:0030335(positive regulation of cell migration);GO:0005089(Rho guanyl-nucleotide exchange factor activity)	NA	ssc-let-7a	m8	-0.184	67	152	-15.41
ciRNA149	chr1	264111965	264112200	-	1	ciRNA	-	ENSSSCT00000005852	ARHGEF39	mRNA	chr1:264111930-264112200	Rho guanine nucleotide exchange factor 39 [Source:HGNC Symbol;Acc:HGNC:25909]	GO:0005886(plasma membrane);GO:0043547(positive regulation of GTPase activity);GO:0035023(regulation of Rho protein signal transduction);GO:0030335(positive regulation of cell migration);GO:0005089(Rho guanyl-nucleotide exchange factor activity)	NA	ssc-let-7c	m8	-0.184	67	152	-15.94
ciRNA149	chr1	264111965	264112200	-	1	ciRNA	-	ENSSSCT00000005852	ARHGEF39	mRNA	chr1:264111930-264112200	Rho guanine nucleotide exchange factor 39 [Source:HGNC Symbol;Acc:HGNC:25909]	GO:0005886(plasma membrane);GO:0043547(positive regulation of GTPase activity);GO:0035023(regulation of Rho protein signal transduction);GO:0030335(positive regulation of cell migration);GO:0005089(Rho guanyl-nucleotide exchange factor activity)	NA	ssc-let-7d-5p	m8	-0.184	67	145	-16.05
ciRNA149	chr1	264111965	264112200	-	1	ciRNA	-	ENSSSCT00000005852	ARHGEF39	mRNA	chr1:264111930-264112200	Rho guanine nucleotide exchange factor 39 [Source:HGNC Symbol;Acc:HGNC:25909]	GO:0005886(plasma membrane);GO:0043547(positive regulation of GTPase activity);GO:0035023(regulation of Rho protein signal transduction);GO:0030335(positive regulation of cell migration);GO:0005089(Rho guanyl-nucleotide exchange factor activity)	NA	ssc-let-7e	m8	-0.184	67	147	-17.66
ciRNA149	chr1	264111965	264112200	-	1	ciRNA	-	ENSSSCT00000005852	ARHGEF39	mRNA	chr1:264111930-264112200	Rho guanine nucleotide exchange factor 39 [Source:HGNC Symbol;Acc:HGNC:25909]	GO:0005886(plasma membrane);GO:0043547(positive regulation of GTPase activity);GO:0035023(regulation of Rho protein signal transduction);GO:0030335(positive regulation of cell migration);GO:0005089(Rho guanyl-nucleotide exchange factor activity)	NA	ssc-let-7f	m8	-0.1995	71	152	-15.69
ciRNA149	chr1	264111965	264112200	-	1	ciRNA	-	ENSSSCT00000005852	ARHGEF39	mRNA	chr1:264111930-264112200	Rho guanine nucleotide exchange factor 39 [Source:HGNC Symbol;Acc:HGNC:25909]	GO:0005886(plasma membrane);GO:0043547(positive regulation of GTPase activity);GO:0035023(regulation of Rho protein signal transduction);GO:0030335(positive regulation of cell migration);GO:0005089(Rho guanyl-nucleotide exchange factor activity)	NA	ssc-let-7g	m8	-0.184	68	155	-15.49
ciRNA149	chr1	264111965	264112200	-	1	ciRNA	-	ENSSSCT00000005852	ARHGEF39	mRNA	chr1:264111930-264112200	Rho guanine nucleotide exchange factor 39 [Source:HGNC Symbol;Acc:HGNC:25909]	GO:0005886(plasma membrane);GO:0043547(positive regulation of GTPase activity);GO:0035023(regulation of Rho protein signal transduction);GO:0030335(positive regulation of cell migration);GO:0005089(Rho guanyl-nucleotide exchange factor activity)	NA	ssc-let-7i	m8	-0.184	68	151	-15.41
ciRNA149	chr1	264111965	264112200	-	1	ciRNA	-	ENSSSCT00000005852	ARHGEF39	mRNA	chr1:264111930-264112200	Rho guanine nucleotide exchange factor 39 [Source:HGNC Symbol;Acc:HGNC:25909]	GO:0005886(plasma membrane);GO:0043547(positive regulation of GTPase activity);GO:0035023(regulation of Rho protein signal transduction);GO:0030335(positive regulation of cell migration);GO:0005089(Rho guanyl-nucleotide exchange factor activity)	NA	ssc-miR-124a	8mer	-0.3132	93	155	-22.26
ciRNA149	chr1	264111965	264112200	-	1	ciRNA	-	ENSSSCT00000005852	ARHGEF39	mRNA	chr1:264111930-264112200	Rho guanine nucleotide exchange factor 39 [Source:HGNC Symbol;Acc:HGNC:25909]	GO:0005886(plasma membrane);GO:0043547(positive regulation of GTPase activity);GO:0035023(regulation of Rho protein signal transduction);GO:0030335(positive regulation of cell migration);GO:0005089(Rho guanyl-nucleotide exchange factor activity)	NA	ssc-miR-140-3p	m8	-0.1765	72	167	-26.58
ciRNA149	chr1	264111965	264112200	-	1	ciRNA	-	ENSSSCT00000005852	ARHGEF39	mRNA	chr1:264111930-264112200	Rho guanine nucleotide exchange factor 39 [Source:HGNC Symbol;Acc:HGNC:25909]	GO:0005886(plasma membrane);GO:0043547(positive regulation of GTPase activity);GO:0035023(regulation of Rho protein signal transduction);GO:0030335(positive regulation of cell migration);GO:0005089(Rho guanyl-nucleotide exchange factor activity)	NA	ssc-miR-29b	m8	-0.159	52	147	-16.17
ciRNA149	chr1	264111965	264112200	-	1	ciRNA	-	ENSSSCT00000005852	ARHGEF39	mRNA	chr1:264111930-264112200	Rho guanine nucleotide exchange factor 39 [Source:HGNC Symbol;Acc:HGNC:25909]	GO:0005886(plasma membrane);GO:0043547(positive regulation of GTPase activity);GO:0035023(regulation of Rho protein signal transduction);GO:0030335(positive regulation of cell migration);GO:0005089(Rho guanyl-nucleotide exchange factor activity)	NA	ssc-miR-29c	m8	-0.159	53	147	-15.8
ciRNA149	chr1	264111965	264112200	-	1	ciRNA	-	ENSSSCT00000005852	ARHGEF39	mRNA	chr1:264111930-264112200	Rho guanine nucleotide exchange factor 39 [Source:HGNC Symbol;Acc:HGNC:25909]	GO:0005886(plasma membrane);GO:0043547(positive regulation of GTPase activity);GO:0035023(regulation of Rho protein signal transduction);GO:0030335(positive regulation of cell migration);GO:0005089(Rho guanyl-nucleotide exchange factor activity)	NA	ssc-miR-421-5p	m8	-0.18	63	145	-16.82
ciRNA149	chr1	264111965	264112200	-	1	ciRNA	-	ENSSSCT00000005852	ARHGEF39	mRNA	chr1:264111930-264112200	Rho guanine nucleotide exchange factor 39 [Source:HGNC Symbol;Acc:HGNC:25909]	GO:0005886(plasma membrane);GO:0043547(positive regulation of GTPase activity);GO:0035023(regulation of Rho protein signal transduction);GO:0030335(positive regulation of cell migration);GO:0005089(Rho guanyl-nucleotide exchange factor activity)	NA	ssc-miR-98	m8	-0.184	67	151	-18.95
ciRNA149	chr1	264111965	264112200	-	1	ciRNA	-	ENSSSCT00000005852	ARHGEF39	mRNA	chr1:264111930-264112200	Rho guanine nucleotide exchange factor 39 [Source:HGNC Symbol;Acc:HGNC:25909]	GO:0005886(plasma membrane);GO:0043547(positive regulation of GTPase activity);GO:0035023(regulation of Rho protein signal transduction);GO:0030335(positive regulation of cell migration);GO:0005089(Rho guanyl-nucleotide exchange factor activity)	NA	ssc-miR-9823-5p	m8	-0.1465	59	155	-25.48
ciRNA15	chr1	205491657	205492026	+	1	ciRNA	-	ENSSSCT00000005577	KTN1	mRNA	chr1:205491656-205492066	kinectin 1 (kinesin receptor) [Source:RefSeq peptide;Acc:NP_001245232]	GO:0016021(integral component of membrane);GO:0016020(membrane);GO:0005783(endoplasmic reticulum);GO:0007018(microtubule-based movement);GO:0045296(cadherin binding);GO:0019894(kinesin binding);GO:0003723(RNA binding)	NA	ssc-miR-124a	m8	-0.324	93	147	-15.77
ciRNA15	chr1	205491657	205492026	+	1	ciRNA	-	ENSSSCT00000005577	KTN1	mRNA	chr1:205491656-205492066	kinectin 1 (kinesin receptor) [Source:RefSeq peptide;Acc:NP_001245232]	GO:0016021(integral component of membrane);GO:0016020(membrane);GO:0005783(endoplasmic reticulum);GO:0007018(microtubule-based movement);GO:0045296(cadherin binding);GO:0019894(kinesin binding);GO:0003723(RNA binding)	NA	ssc-miR-1839-5p	m8	-0.1885	70	143	-14.67
ciRNA15	chr1	205491657	205492026	+	1	ciRNA	-	ENSSSCT00000005577	KTN1	mRNA	chr1:205491656-205492066	kinectin 1 (kinesin receptor) [Source:RefSeq peptide;Acc:NP_001245232]	GO:0016021(integral component of membrane);GO:0016020(membrane);GO:0005783(endoplasmic reticulum);GO:0007018(microtubule-based movement);GO:0045296(cadherin binding);GO:0019894(kinesin binding);GO:0003723(RNA binding)	NA	ssc-miR-374b-5p	m8	-0.249	83	163	-12.87
ciRNA15	chr1	205491657	205492026	+	1	ciRNA	-	ENSSSCT00000005577	KTN1	mRNA	chr1:205491656-205492066	kinectin 1 (kinesin receptor) [Source:RefSeq peptide;Acc:NP_001245232]	GO:0016021(integral component of membrane);GO:0016020(membrane);GO:0005783(endoplasmic reticulum);GO:0007018(microtubule-based movement);GO:0045296(cadherin binding);GO:0019894(kinesin binding);GO:0003723(RNA binding)	NA	ssc-miR-664-3p	1a	-0.18185	64	141	-15
ciRNA151	chr14	42036538	42036754	+	1	ciRNA	-	ENSSSCT00000010835	ENSSSCG00000009885	mRNA	chr14:42036537-42036777	NA	GO:0016567(protein ubiquitination);GO:0016740(transferase activity);GO:0004842(ubiquitin-protein transferase activity)	NA	ssc-miR-326	m8	-0.1575	65	155	-26.05
ciRNA151	chr14	42036538	42036754	+	1	ciRNA	-	ENSSSCT00000010835	ENSSSCG00000009885	mRNA	chr14:42036537-42036777	NA	GO:0016567(protein ubiquitination);GO:0016740(transferase activity);GO:0004842(ubiquitin-protein transferase activity)	NA	ssc-miR-331-3p	m8	-0.128	52	140	-18.6
ciRNA151	chr14	42036538	42036754	+	1	ciRNA	-	ENSSSCT00000010835	ENSSSCG00000009885	mRNA	chr14:42036537-42036777	NA	GO:0016567(protein ubiquitination);GO:0016740(transferase activity);GO:0004842(ubiquitin-protein transferase activity)	NA	ssc-miR-9821-5p	m8	-0.221	81	145	-24.58
ciRNA151	chr14	42036538	42036754	+	1	ciRNA	-	ENSSSCT00000010835	ENSSSCG00000009885	mRNA	chr14:42036537-42036777	NA	GO:0016567(protein ubiquitination);GO:0016740(transferase activity);GO:0004842(ubiquitin-protein transferase activity)	NA	ssc-miR-9822-3p	m8	-0.1435	57	140	-18.79
ciRNA152	chr14	80636711	80636995	-	1	ciRNA	-	ENSSSCT00000011253	PSAP	mRNA	chr14:80636688-80636995	prosaposin [Source:HGNC Symbol;Acc:HGNC:9498]	GO:0070062(extracellular exosome);GO:0043231(intracellular membrane-bounded organelle);GO:0005764(lysosome);GO:0005739(mitochondrion);GO:0005615(extracellular space);GO:1903206(negative regulation of hydrogen peroxide-induced cell death);GO:0071310(cellular response to organic substance);GO:0060742(epithelial cell differentiation involved in prostate gland development);GO:0060736(prostate gland g…	04142(Lysosome)	ssc-miR-335	m8	-0.187	68	144	-12.5
ciRNA152	chr14	80636711	80636995	-	1	ciRNA	-	ENSSSCT00000011253	PSAP	mRNA	chr14:80636688-80636995	prosaposin [Source:HGNC Symbol;Acc:HGNC:9498]	GO:0070062(extracellular exosome);GO:0043231(intracellular membrane-bounded organelle);GO:0005764(lysosome);GO:0005739(mitochondrion);GO:0005615(extracellular space);GO:1903206(negative regulation of hydrogen peroxide-induced cell death);GO:0071310(cellular response to organic substance);GO:0060742(epithelial cell differentiation involved in prostate gland development);GO:0060736(prostate gland g…	04142(Lysosome)	ssc-miR-361-3p	m8	-0.187	75	154	-25.26
ciRNA152	chr14	80636711	80636995	-	1	ciRNA	-	ENSSSCT00000011253	PSAP	mRNA	chr14:80636688-80636995	prosaposin [Source:HGNC Symbol;Acc:HGNC:9498]	GO:0070062(extracellular exosome);GO:0043231(intracellular membrane-bounded organelle);GO:0005764(lysosome);GO:0005739(mitochondrion);GO:0005615(extracellular space);GO:1903206(negative regulation of hydrogen peroxide-induced cell death);GO:0071310(cellular response to organic substance);GO:0060742(epithelial cell differentiation involved in prostate gland development);GO:0060736(prostate gland g…	04142(Lysosome)	ssc-miR-532-3p	m8	-0.2535	85	147	-18.52
ciRNA152	chr14	80636711	80636995	-	1	ciRNA	-	ENSSSCT00000011253	PSAP	mRNA	chr14:80636688-80636995	prosaposin [Source:HGNC Symbol;Acc:HGNC:9498]	GO:0070062(extracellular exosome);GO:0043231(intracellular membrane-bounded organelle);GO:0005764(lysosome);GO:0005739(mitochondrion);GO:0005615(extracellular space);GO:1903206(negative regulation of hydrogen peroxide-induced cell death);GO:0071310(cellular response to organic substance);GO:0060742(epithelial cell differentiation involved in prostate gland development);GO:0060736(prostate gland g…	04142(Lysosome)	ssc-miR-9856-3p	m8	-0.179	72	151	-21.1
ciRNA153	chr6	25085762	25085987	-	1	ciRNA	-	ENSSSCT00000033715	HSF4	mRNA	chr6:25085761-25085987	heat shock transcription factor 4 [Source:HGNC Symbol;Acc:HGNC:5227]	GO:0005634(nucleus);GO:0006357(regulation of transcription from RNA polymerase II promoter);GO:0006355(regulation of transcription, DNA-templated);GO:0043565(sequence-specific DNA binding);GO:0003700(transcription factor activity, sequence-specific DNA binding);GO:0003677(DNA binding);GO:0016607(nuclear speck);GO:0070207(protein homotrimerization);GO:0048468(cell development);GO:0045944(positive …	NA	ssc-miR-129a-3p	m8	-0.116	52	158	-18.18
ciRNA153	chr6	25085762	25085987	-	1	ciRNA	-	ENSSSCT00000033715	HSF4	mRNA	chr6:25085761-25085987	heat shock transcription factor 4 [Source:HGNC Symbol;Acc:HGNC:5227]	GO:0005634(nucleus);GO:0006357(regulation of transcription from RNA polymerase II promoter);GO:0006355(regulation of transcription, DNA-templated);GO:0043565(sequence-specific DNA binding);GO:0003700(transcription factor activity, sequence-specific DNA binding);GO:0003677(DNA binding);GO:0016607(nuclear speck);GO:0070207(protein homotrimerization);GO:0048468(cell development);GO:0045944(positive …	NA	ssc-miR-224	m8	-0.171	60	147	-21.14
ciRNA153	chr6	25085762	25085987	-	1	ciRNA	-	ENSSSCT00000033715	HSF4	mRNA	chr6:25085761-25085987	heat shock transcription factor 4 [Source:HGNC Symbol;Acc:HGNC:5227]	GO:0005634(nucleus);GO:0006357(regulation of transcription from RNA polymerase II promoter);GO:0006355(regulation of transcription, DNA-templated);GO:0043565(sequence-specific DNA binding);GO:0003700(transcription factor activity, sequence-specific DNA binding);GO:0003677(DNA binding);GO:0016607(nuclear speck);GO:0070207(protein homotrimerization);GO:0048468(cell development);GO:0045944(positive …	NA	ssc-miR-7137-5p	8mer	-0.4412	99	140	-15.47
ciRNA153	chr6	25085762	25085987	-	1	ciRNA	-	ENSSSCT00000033715	HSF4	mRNA	chr6:25085761-25085987	heat shock transcription factor 4 [Source:HGNC Symbol;Acc:HGNC:5227]	GO:0005634(nucleus);GO:0006357(regulation of transcription from RNA polymerase II promoter);GO:0006355(regulation of transcription, DNA-templated);GO:0043565(sequence-specific DNA binding);GO:0003700(transcription factor activity, sequence-specific DNA binding);GO:0003677(DNA binding);GO:0016607(nuclear speck);GO:0070207(protein homotrimerization);GO:0048468(cell development);GO:0045944(positive …	NA	ssc-miR-9845-5p	m8	-0.18	69	162	-25.24
ciRNA154	chr6	45235479	45236048	-	1	ciRNA	-	ENSSSCT00000003340	ENSSSCG00000003007	mRNA	chr6:45235453-45236048	NA	GO:0055114(oxidation-reduction process);GO:0008152(metabolic process);GO:0016624(oxidoreductase activity, acting on the aldehyde or oxo group of donors, disulfide as acceptor)	NA	ssc-miR-1224	8mer	-0.19925	74	149	-24.61
ciRNA154	chr6	45235479	45236048	-	1	ciRNA	-	ENSSSCT00000003340	ENSSSCG00000003007	mRNA	chr6:45235453-45236048	NA	GO:0055114(oxidation-reduction process);GO:0008152(metabolic process);GO:0016624(oxidoreductase activity, acting on the aldehyde or oxo group of donors, disulfide as acceptor)	NA	ssc-miR-1296-5p	m8	-0.177	70	145	-19.69
ciRNA154	chr6	45235479	45236048	-	1	ciRNA	-	ENSSSCT00000003340	ENSSSCG00000003007	mRNA	chr6:45235453-45236048	NA	GO:0055114(oxidation-reduction process);GO:0008152(metabolic process);GO:0016624(oxidoreductase activity, acting on the aldehyde or oxo group of donors, disulfide as acceptor)	NA	ssc-miR-16	m8	-0.15	54	146	-18.15
ciRNA154	chr6	45235479	45236048	-	1	ciRNA	-	ENSSSCT00000003340	ENSSSCG00000003007	mRNA	chr6:45235453-45236048	NA	GO:0055114(oxidation-reduction process);GO:0008152(metabolic process);GO:0016624(oxidoreductase activity, acting on the aldehyde or oxo group of donors, disulfide as acceptor)	NA	ssc-miR-195	m8	-0.15	54	149	-14.56
ciRNA154	chr6	45235479	45236048	-	1	ciRNA	-	ENSSSCT00000003340	ENSSSCG00000003007	mRNA	chr6:45235453-45236048	NA	GO:0055114(oxidation-reduction process);GO:0008152(metabolic process);GO:0016624(oxidoreductase activity, acting on the aldehyde or oxo group of donors, disulfide as acceptor)	NA	ssc-miR-214	m8	-0.15	58	153	-19.18
ciRNA154	chr6	45235479	45236048	-	1	ciRNA	-	ENSSSCT00000003340	ENSSSCG00000003007	mRNA	chr6:45235453-45236048	NA	GO:0055114(oxidation-reduction process);GO:0008152(metabolic process);GO:0016624(oxidoreductase activity, acting on the aldehyde or oxo group of donors, disulfide as acceptor)	NA	ssc-miR-221-5p	8mer	-0.31115	89	150	-18.03
ciRNA154	chr6	45235479	45236048	-	1	ciRNA	-	ENSSSCT00000003340	ENSSSCG00000003007	mRNA	chr6:45235453-45236048	NA	GO:0055114(oxidation-reduction process);GO:0008152(metabolic process);GO:0016624(oxidoreductase activity, acting on the aldehyde or oxo group of donors, disulfide as acceptor)	NA	ssc-miR-224	8mer	-0.31815	96	147	-13.49
ciRNA154	chr6	45235479	45236048	-	1	ciRNA	-	ENSSSCT00000003340	ENSSSCG00000003007	mRNA	chr6:45235453-45236048	NA	GO:0055114(oxidation-reduction process);GO:0008152(metabolic process);GO:0016624(oxidoreductase activity, acting on the aldehyde or oxo group of donors, disulfide as acceptor)	NA	ssc-miR-296-5p	m8	-0.111	55	140	-14.25
ciRNA154	chr6	45235479	45236048	-	1	ciRNA	-	ENSSSCT00000003340	ENSSSCG00000003007	mRNA	chr6:45235453-45236048	NA	GO:0055114(oxidation-reduction process);GO:0008152(metabolic process);GO:0016624(oxidoreductase activity, acting on the aldehyde or oxo group of donors, disulfide as acceptor)	NA	ssc-miR-326	m8	-0.148	60	140	-20.63
ciRNA154	chr6	45235479	45236048	-	1	ciRNA	-	ENSSSCT00000003340	ENSSSCG00000003007	mRNA	chr6:45235453-45236048	NA	GO:0055114(oxidation-reduction process);GO:0008152(metabolic process);GO:0016624(oxidoreductase activity, acting on the aldehyde or oxo group of donors, disulfide as acceptor)	NA	ssc-miR-383	8mer	-0.2962	90	145	-14.27
ciRNA154	chr6	45235479	45236048	-	1	ciRNA	-	ENSSSCT00000003340	ENSSSCG00000003007	mRNA	chr6:45235453-45236048	NA	GO:0055114(oxidation-reduction process);GO:0008152(metabolic process);GO:0016624(oxidoreductase activity, acting on the aldehyde or oxo group of donors, disulfide as acceptor)	NA	ssc-miR-424-5p	m8	-0.15	52	147	-19.07
ciRNA154	chr6	45235479	45236048	-	1	ciRNA	-	ENSSSCT00000003340	ENSSSCG00000003007	mRNA	chr6:45235453-45236048	NA	GO:0055114(oxidation-reduction process);GO:0008152(metabolic process);GO:0016624(oxidoreductase activity, acting on the aldehyde or oxo group of donors, disulfide as acceptor)	NA	ssc-miR-484	m8	-0.1435	70	154	-31.45
ciRNA154	chr6	45235479	45236048	-	1	ciRNA	-	ENSSSCT00000003340	ENSSSCG00000003007	mRNA	chr6:45235453-45236048	NA	GO:0055114(oxidation-reduction process);GO:0008152(metabolic process);GO:0016624(oxidoreductase activity, acting on the aldehyde or oxo group of donors, disulfide as acceptor)	NA	ssc-miR-497	m8	-0.15	54	140	-19.13
ciRNA154	chr6	45235479	45236048	-	1	ciRNA	-	ENSSSCT00000003340	ENSSSCG00000003007	mRNA	chr6:45235453-45236048	NA	GO:0055114(oxidation-reduction process);GO:0008152(metabolic process);GO:0016624(oxidoreductase activity, acting on the aldehyde or oxo group of donors, disulfide as acceptor)	NA	ssc-miR-615	m8	-0.158	64	155	-26.94
ciRNA154	chr6	45235479	45236048	-	1	ciRNA	-	ENSSSCT00000003340	ENSSSCG00000003007	mRNA	chr6:45235453-45236048	NA	GO:0055114(oxidation-reduction process);GO:0008152(metabolic process);GO:0016624(oxidoreductase activity, acting on the aldehyde or oxo group of donors, disulfide as acceptor)	NA	ssc-miR-9797-3p	8mer	-0.22525	90	146	-16.2
ciRNA155	chr6	50096548	50096877	-	1	ciRNA	-	ENSSSCT00000003500	FTL	mRNA	chr6:50096523-50096877	NA	GO:0005623(cell);GO:0006879(cellular iron ion homeostasis);GO:0006826(iron ion transport);GO:0046872(metal ion binding);GO:0008199(ferric iron binding)	04978(Mineral absorption)	ssc-miR-27b-5p	m8	-0.2795	94	151	-17.59
ciRNA155	chr6	50096548	50096877	-	1	ciRNA	-	ENSSSCT00000003500	FTL	mRNA	chr6:50096523-50096877	NA	GO:0005623(cell);GO:0006879(cellular iron ion homeostasis);GO:0006826(iron ion transport);GO:0046872(metal ion binding);GO:0008199(ferric iron binding)	04978(Mineral absorption)	ssc-miR-345-3p	m8	-0.178	75	147	-20.81
ciRNA155	chr6	50096548	50096877	-	1	ciRNA	-	ENSSSCT00000003500	FTL	mRNA	chr6:50096523-50096877	NA	GO:0005623(cell);GO:0006879(cellular iron ion homeostasis);GO:0006826(iron ion transport);GO:0046872(metal ion binding);GO:0008199(ferric iron binding)	04978(Mineral absorption)	ssc-miR-424-3p	m8	-0.213	73	151	-12.27
ciRNA155	chr6	50096548	50096877	-	1	ciRNA	-	ENSSSCT00000003500	FTL	mRNA	chr6:50096523-50096877	NA	GO:0005623(cell);GO:0006879(cellular iron ion homeostasis);GO:0006826(iron ion transport);GO:0046872(metal ion binding);GO:0008199(ferric iron binding)	04978(Mineral absorption)	ssc-miR-7136-3p	m8	-0.244	84	155	-21.09
ciRNA155	chr6	50096548	50096877	-	1	ciRNA	-	ENSSSCT00000003500	FTL	mRNA	chr6:50096523-50096877	NA	GO:0005623(cell);GO:0006879(cellular iron ion homeostasis);GO:0006826(iron ion transport);GO:0046872(metal ion binding);GO:0008199(ferric iron binding)	04978(Mineral absorption)	ssc-miR-7137-5p	8mer	-0.23615	90	150	-24.8
ciRNA155	chr6	50096548	50096877	-	1	ciRNA	-	ENSSSCT00000003500	FTL	mRNA	chr6:50096523-50096877	NA	GO:0005623(cell);GO:0006879(cellular iron ion homeostasis);GO:0006826(iron ion transport);GO:0046872(metal ion binding);GO:0008199(ferric iron binding)	04978(Mineral absorption)	ssc-miR-9804-5p	8mer	-0.29215	89	148	-18.02
ciRNA156	chr6	155191396	155191683	-	1	ciRNA	-	ENSSSCT00000004359	SZT2	mRNA	chr6:155191249-155191683	seizure threshold 2 homolog (mouse) [Source:HGNC Symbol;Acc:HGNC:29040]	GO:0070062(extracellular exosome);GO:0005777(peroxisome);GO:0021540(corpus callosum morphogenesis)	NA	ssc-miR-22-3p	m8	-0.1795	66	149	-15.91
ciRNA156	chr6	155191396	155191683	-	1	ciRNA	-	ENSSSCT00000004359	SZT2	mRNA	chr6:155191249-155191683	seizure threshold 2 homolog (mouse) [Source:HGNC Symbol;Acc:HGNC:29040]	GO:0070062(extracellular exosome);GO:0005777(peroxisome);GO:0021540(corpus callosum morphogenesis)	NA	ssc-miR-31	m8	-0.1805	64	147	-17.97
ciRNA156	chr6	155191396	155191683	-	1	ciRNA	-	ENSSSCT00000004359	SZT2	mRNA	chr6:155191249-155191683	seizure threshold 2 homolog (mouse) [Source:HGNC Symbol;Acc:HGNC:29040]	GO:0070062(extracellular exosome);GO:0005777(peroxisome);GO:0021540(corpus callosum morphogenesis)	NA	ssc-miR-450b-3p	m8	-0.158	68	155	-11.11
ciRNA156	chr6	155191396	155191683	-	1	ciRNA	-	ENSSSCT00000004359	SZT2	mRNA	chr6:155191249-155191683	seizure threshold 2 homolog (mouse) [Source:HGNC Symbol;Acc:HGNC:29040]	GO:0070062(extracellular exosome);GO:0005777(peroxisome);GO:0021540(corpus callosum morphogenesis)	NA	ssc-miR-9824-5p	m8	-0.121	54	145	-28.26
ciRNA156	chr6	155191396	155191683	-	1	ciRNA	-	ENSSSCT00000004359	SZT2	mRNA	chr6:155191249-155191683	seizure threshold 2 homolog (mouse) [Source:HGNC Symbol;Acc:HGNC:29040]	GO:0070062(extracellular exosome);GO:0005777(peroxisome);GO:0021540(corpus callosum morphogenesis)	NA	ssc-miR-9838-5p	m8	-0.197	75	148	-14.74
ciRNA157	chr5	24347487	24347971	+	1	ciRNA	-	ENSSSCT00000000457	ENSSSCG00000000423	mRNA	chr5:24347486-24347990	NA	GO:0016021(integral component of membrane);GO:0016020(membrane);GO:0005509(calcium ion binding)	NA	ssc-miR-1296-5p	m8	-0.191	77	164	-27.69
ciRNA157	chr5	24347487	24347971	+	1	ciRNA	-	ENSSSCT00000000457	ENSSSCG00000000423	mRNA	chr5:24347486-24347990	NA	GO:0016021(integral component of membrane);GO:0016020(membrane);GO:0005509(calcium ion binding)	NA	ssc-miR-331-3p	m8	-0.141	59	145	-18.78
ciRNA157	chr5	24347487	24347971	+	1	ciRNA	-	ENSSSCT00000000457	ENSSSCG00000000423	mRNA	chr5:24347486-24347990	NA	GO:0016021(integral component of membrane);GO:0016020(membrane);GO:0005509(calcium ion binding)	NA	ssc-miR-4335	m8	-0.138	54	152	-21.26
ciRNA157	chr5	24347487	24347971	+	1	ciRNA	-	ENSSSCT00000000457	ENSSSCG00000000423	mRNA	chr5:24347486-24347990	NA	GO:0016021(integral component of membrane);GO:0016020(membrane);GO:0005509(calcium ion binding)	NA	ssc-miR-532-3p	m8	-0.137	51	141	-14.43
ciRNA157	chr5	24347487	24347971	+	1	ciRNA	-	ENSSSCT00000000457	ENSSSCG00000000423	mRNA	chr5:24347486-24347990	NA	GO:0016021(integral component of membrane);GO:0016020(membrane);GO:0005509(calcium ion binding)	NA	ssc-miR-7	8mer	-0.21725	82	152	-17.3
ciRNA157	chr5	24347487	24347971	+	1	ciRNA	-	ENSSSCT00000000457	ENSSSCG00000000423	mRNA	chr5:24347486-24347990	NA	GO:0016021(integral component of membrane);GO:0016020(membrane);GO:0005509(calcium ion binding)	NA	ssc-miR-7137-3p	m8	-0.1805	69	166	-29.46
ciRNA157	chr5	24347487	24347971	+	1	ciRNA	-	ENSSSCT00000000457	ENSSSCG00000000423	mRNA	chr5:24347486-24347990	NA	GO:0016021(integral component of membrane);GO:0016020(membrane);GO:0005509(calcium ion binding)	NA	ssc-miR-885-3p	m8	-0.099	52	146	-23.33
ciRNA157	chr5	24347487	24347971	+	1	ciRNA	-	ENSSSCT00000000457	ENSSSCG00000000423	mRNA	chr5:24347486-24347990	NA	GO:0016021(integral component of membrane);GO:0016020(membrane);GO:0005509(calcium ion binding)	NA	ssc-miR-9824-5p	m8	-0.123	56	144	-23
ciRNA157	chr5	24347487	24347971	+	1	ciRNA	-	ENSSSCT00000000457	ENSSSCG00000000423	mRNA	chr5:24347486-24347990	NA	GO:0016021(integral component of membrane);GO:0016020(membrane);GO:0005509(calcium ion binding)	NA	ssc-miR-9849-5p	8mer	-0.3852	92	144	-17.57
ciRNA158	chr5	69626783	69627085	+	1	ciRNA	-	ENSSSCT00000000809	ENSSSCG00000000745	mRNA	chr5:69626782-69627109	NA	GO:0005634(nucleus);GO:0006139(nucleobase-containing compound metabolic process);GO:0016818(hydrolase activity, acting on acid anhydrides, in phosphorus-containing anhydrides);GO:0016787(hydrolase activity);GO:0008026(ATP-dependent helicase activity);GO:0005524(ATP binding);GO:0004386(helicase activity);GO:0004003(ATP-dependent DNA helicase activity);GO:0003677(DNA binding);GO:0003676(nucleic aci…	NA	ssc-miR-212	m8	-0.2895	85	168	-28.91
ciRNA158	chr5	69626783	69627085	+	1	ciRNA	-	ENSSSCT00000000809	ENSSSCG00000000745	mRNA	chr5:69626782-69627109	NA	GO:0005634(nucleus);GO:0006139(nucleobase-containing compound metabolic process);GO:0016818(hydrolase activity, acting on acid anhydrides, in phosphorus-containing anhydrides);GO:0016787(hydrolase activity);GO:0008026(ATP-dependent helicase activity);GO:0005524(ATP binding);GO:0004386(helicase activity);GO:0004003(ATP-dependent DNA helicase activity);GO:0003677(DNA binding);GO:0003676(nucleic aci…	NA	ssc-miR-378	m8	-0.1715	59	151	-23.94
ciRNA158	chr5	69626783	69627085	+	1	ciRNA	-	ENSSSCT00000000809	ENSSSCG00000000745	mRNA	chr5:69626782-69627109	NA	GO:0005634(nucleus);GO:0006139(nucleobase-containing compound metabolic process);GO:0016818(hydrolase activity, acting on acid anhydrides, in phosphorus-containing anhydrides);GO:0016787(hydrolase activity);GO:0008026(ATP-dependent helicase activity);GO:0005524(ATP binding);GO:0004386(helicase activity);GO:0004003(ATP-dependent DNA helicase activity);GO:0003677(DNA binding);GO:0003676(nucleic aci…	NA	ssc-miR-378b-3p	m8	-0.1715	59	148	-19.37
ciRNA158	chr5	69626783	69627085	+	1	ciRNA	-	ENSSSCT00000000809	ENSSSCG00000000745	mRNA	chr5:69626782-69627109	NA	GO:0005634(nucleus);GO:0006139(nucleobase-containing compound metabolic process);GO:0016818(hydrolase activity, acting on acid anhydrides, in phosphorus-containing anhydrides);GO:0016787(hydrolase activity);GO:0008026(ATP-dependent helicase activity);GO:0005524(ATP binding);GO:0004386(helicase activity);GO:0004003(ATP-dependent DNA helicase activity);GO:0003677(DNA binding);GO:0003676(nucleic aci…	NA	ssc-miR-383	m8	-0.276	88	149	-21.08
ciRNA158	chr5	69626783	69627085	+	1	ciRNA	-	ENSSSCT00000000809	ENSSSCG00000000745	mRNA	chr5:69626782-69627109	NA	GO:0005634(nucleus);GO:0006139(nucleobase-containing compound metabolic process);GO:0016818(hydrolase activity, acting on acid anhydrides, in phosphorus-containing anhydrides);GO:0016787(hydrolase activity);GO:0008026(ATP-dependent helicase activity);GO:0005524(ATP binding);GO:0004386(helicase activity);GO:0004003(ATP-dependent DNA helicase activity);GO:0003677(DNA binding);GO:0003676(nucleic aci…	NA	ssc-miR-4334-5p	m8	-0.1765	75	146	-20.91
ciRNA158	chr5	69626783	69627085	+	1	ciRNA	-	ENSSSCT00000000809	ENSSSCG00000000745	mRNA	chr5:69626782-69627109	NA	GO:0005634(nucleus);GO:0006139(nucleobase-containing compound metabolic process);GO:0016818(hydrolase activity, acting on acid anhydrides, in phosphorus-containing anhydrides);GO:0016787(hydrolase activity);GO:0008026(ATP-dependent helicase activity);GO:0005524(ATP binding);GO:0004386(helicase activity);GO:0004003(ATP-dependent DNA helicase activity);GO:0003677(DNA binding);GO:0003676(nucleic aci…	NA	ssc-miR-490	m8	-0.168	53	154	-21.32
ciRNA158	chr5	69626783	69627085	+	1	ciRNA	-	ENSSSCT00000000809	ENSSSCG00000000745	mRNA	chr5:69626782-69627109	NA	GO:0005634(nucleus);GO:0006139(nucleobase-containing compound metabolic process);GO:0016818(hydrolase activity, acting on acid anhydrides, in phosphorus-containing anhydrides);GO:0016787(hydrolase activity);GO:0008026(ATP-dependent helicase activity);GO:0005524(ATP binding);GO:0004386(helicase activity);GO:0004003(ATP-dependent DNA helicase activity);GO:0003677(DNA binding);GO:0003676(nucleic aci…	NA	ssc-miR-490-3p	m8	-0.168	53	154	-21.32
ciRNA158	chr5	69626783	69627085	+	1	ciRNA	-	ENSSSCT00000000809	ENSSSCG00000000745	mRNA	chr5:69626782-69627109	NA	GO:0005634(nucleus);GO:0006139(nucleobase-containing compound metabolic process);GO:0016818(hydrolase activity, acting on acid anhydrides, in phosphorus-containing anhydrides);GO:0016787(hydrolase activity);GO:0008026(ATP-dependent helicase activity);GO:0005524(ATP binding);GO:0004386(helicase activity);GO:0004003(ATP-dependent DNA helicase activity);GO:0003677(DNA binding);GO:0003676(nucleic aci…	NA	ssc-miR-9848-3p	8mer	-0.24815	87	143	-19.14
ciRNA159	chr5	84082909	84083870	-	1	ciRNA	-	ENSSSCT00000000926	HSP90B1	mRNA	chr5:84082879-84083870	endoplasmin precursor [Source:RefSeq peptide;Acc:NP_999268]	GO:0070062(extracellular exosome);GO:0048471(perinuclear region of cytoplasm);GO:0034663(endoplasmic reticulum chaperone complex);GO:0031012(extracellular matrix);GO:0030496(midbody);GO:0016020(membrane);GO:0005925(focal adhesion);GO:0005886(plasma membrane);GO:0005829(cytosol);GO:0005789(endoplasmic reticulum membrane);GO:0005788(endoplasmic reticulum lumen);GO:0005783(endoplasmic reticulum);GO:…	NA	ssc-miR-136	m8	-0.209	70	150	-13.76
ciRNA159	chr5	84082909	84083870	-	1	ciRNA	-	ENSSSCT00000000926	HSP90B1	mRNA	chr5:84082879-84083870	endoplasmin precursor [Source:RefSeq peptide;Acc:NP_999268]	GO:0070062(extracellular exosome);GO:0048471(perinuclear region of cytoplasm);GO:0034663(endoplasmic reticulum chaperone complex);GO:0031012(extracellular matrix);GO:0030496(midbody);GO:0016020(membrane);GO:0005925(focal adhesion);GO:0005886(plasma membrane);GO:0005829(cytosol);GO:0005789(endoplasmic reticulum membrane);GO:0005788(endoplasmic reticulum lumen);GO:0005783(endoplasmic reticulum);GO:…	NA	ssc-miR-181a	8mer	-0.1993	66	157	-17.69
ciRNA159	chr5	84082909	84083870	-	1	ciRNA	-	ENSSSCT00000000926	HSP90B1	mRNA	chr5:84082879-84083870	endoplasmin precursor [Source:RefSeq peptide;Acc:NP_999268]	GO:0070062(extracellular exosome);GO:0048471(perinuclear region of cytoplasm);GO:0034663(endoplasmic reticulum chaperone complex);GO:0031012(extracellular matrix);GO:0030496(midbody);GO:0016020(membrane);GO:0005925(focal adhesion);GO:0005886(plasma membrane);GO:0005829(cytosol);GO:0005789(endoplasmic reticulum membrane);GO:0005788(endoplasmic reticulum lumen);GO:0005783(endoplasmic reticulum);GO:…	NA	ssc-miR-181b	8mer	-0.1993	67	153	-19
ciRNA159	chr5	84082909	84083870	-	1	ciRNA	-	ENSSSCT00000000926	HSP90B1	mRNA	chr5:84082879-84083870	endoplasmin precursor [Source:RefSeq peptide;Acc:NP_999268]	GO:0070062(extracellular exosome);GO:0048471(perinuclear region of cytoplasm);GO:0034663(endoplasmic reticulum chaperone complex);GO:0031012(extracellular matrix);GO:0030496(midbody);GO:0016020(membrane);GO:0005925(focal adhesion);GO:0005886(plasma membrane);GO:0005829(cytosol);GO:0005789(endoplasmic reticulum membrane);GO:0005788(endoplasmic reticulum lumen);GO:0005783(endoplasmic reticulum);GO:…	NA	ssc-miR-181c	8mer	-0.19725	68	157	-14.4
ciRNA159	chr5	84082909	84083870	-	1	ciRNA	-	ENSSSCT00000000926	HSP90B1	mRNA	chr5:84082879-84083870	endoplasmin precursor [Source:RefSeq peptide;Acc:NP_999268]	GO:0070062(extracellular exosome);GO:0048471(perinuclear region of cytoplasm);GO:0034663(endoplasmic reticulum chaperone complex);GO:0031012(extracellular matrix);GO:0030496(midbody);GO:0016020(membrane);GO:0005925(focal adhesion);GO:0005886(plasma membrane);GO:0005829(cytosol);GO:0005789(endoplasmic reticulum membrane);GO:0005788(endoplasmic reticulum lumen);GO:0005783(endoplasmic reticulum);GO:…	NA	ssc-miR-181d-5p	8mer	-0.1993	66	161	-22.04
ciRNA159	chr5	84082909	84083870	-	1	ciRNA	-	ENSSSCT00000000926	HSP90B1	mRNA	chr5:84082879-84083870	endoplasmin precursor [Source:RefSeq peptide;Acc:NP_999268]	GO:0070062(extracellular exosome);GO:0048471(perinuclear region of cytoplasm);GO:0034663(endoplasmic reticulum chaperone complex);GO:0031012(extracellular matrix);GO:0030496(midbody);GO:0016020(membrane);GO:0005925(focal adhesion);GO:0005886(plasma membrane);GO:0005829(cytosol);GO:0005789(endoplasmic reticulum membrane);GO:0005788(endoplasmic reticulum lumen);GO:0005783(endoplasmic reticulum);GO:…	NA	ssc-miR-186	m8	-0.1445	55	147	-14.31
ciRNA159	chr5	84082909	84083870	-	1	ciRNA	-	ENSSSCT00000000926	HSP90B1	mRNA	chr5:84082879-84083870	endoplasmin precursor [Source:RefSeq peptide;Acc:NP_999268]	GO:0070062(extracellular exosome);GO:0048471(perinuclear region of cytoplasm);GO:0034663(endoplasmic reticulum chaperone complex);GO:0031012(extracellular matrix);GO:0030496(midbody);GO:0016020(membrane);GO:0005925(focal adhesion);GO:0005886(plasma membrane);GO:0005829(cytosol);GO:0005789(endoplasmic reticulum membrane);GO:0005788(endoplasmic reticulum lumen);GO:0005783(endoplasmic reticulum);GO:…	NA	ssc-miR-194b-3p	m8	-0.202	79	144	-21.51
ciRNA159	chr5	84082909	84083870	-	1	ciRNA	-	ENSSSCT00000000926	HSP90B1	mRNA	chr5:84082879-84083870	endoplasmin precursor [Source:RefSeq peptide;Acc:NP_999268]	GO:0070062(extracellular exosome);GO:0048471(perinuclear region of cytoplasm);GO:0034663(endoplasmic reticulum chaperone complex);GO:0031012(extracellular matrix);GO:0030496(midbody);GO:0016020(membrane);GO:0005925(focal adhesion);GO:0005886(plasma membrane);GO:0005829(cytosol);GO:0005789(endoplasmic reticulum membrane);GO:0005788(endoplasmic reticulum lumen);GO:0005783(endoplasmic reticulum);GO:…	NA	ssc-miR-27a	8mer	-0.15625	62	142	-14.79
ciRNA159	chr5	84082909	84083870	-	1	ciRNA	-	ENSSSCT00000000926	HSP90B1	mRNA	chr5:84082879-84083870	endoplasmin precursor [Source:RefSeq peptide;Acc:NP_999268]	GO:0070062(extracellular exosome);GO:0048471(perinuclear region of cytoplasm);GO:0034663(endoplasmic reticulum chaperone complex);GO:0031012(extracellular matrix);GO:0030496(midbody);GO:0016020(membrane);GO:0005925(focal adhesion);GO:0005886(plasma membrane);GO:0005829(cytosol);GO:0005789(endoplasmic reticulum membrane);GO:0005788(endoplasmic reticulum lumen);GO:0005783(endoplasmic reticulum);GO:…	NA	ssc-miR-27b-3p	8mer	-0.15625	62	141	-15.37
ciRNA159	chr5	84082909	84083870	-	1	ciRNA	-	ENSSSCT00000000926	HSP90B1	mRNA	chr5:84082879-84083870	endoplasmin precursor [Source:RefSeq peptide;Acc:NP_999268]	GO:0070062(extracellular exosome);GO:0048471(perinuclear region of cytoplasm);GO:0034663(endoplasmic reticulum chaperone complex);GO:0031012(extracellular matrix);GO:0030496(midbody);GO:0016020(membrane);GO:0005925(focal adhesion);GO:0005886(plasma membrane);GO:0005829(cytosol);GO:0005789(endoplasmic reticulum membrane);GO:0005788(endoplasmic reticulum lumen);GO:0005783(endoplasmic reticulum);GO:…	NA	ssc-miR-30b-3p	m8	-0.2925	88	157	-21.8
ciRNA159	chr5	84082909	84083870	-	1	ciRNA	-	ENSSSCT00000000926	HSP90B1	mRNA	chr5:84082879-84083870	endoplasmin precursor [Source:RefSeq peptide;Acc:NP_999268]	GO:0070062(extracellular exosome);GO:0048471(perinuclear region of cytoplasm);GO:0034663(endoplasmic reticulum chaperone complex);GO:0031012(extracellular matrix);GO:0030496(midbody);GO:0016020(membrane);GO:0005925(focal adhesion);GO:0005886(plasma membrane);GO:0005829(cytosol);GO:0005789(endoplasmic reticulum membrane);GO:0005788(endoplasmic reticulum lumen);GO:0005783(endoplasmic reticulum);GO:…	NA	ssc-miR-331-3p	1a	-0.1492	64	142	-23.21
ciRNA159	chr5	84082909	84083870	-	1	ciRNA	-	ENSSSCT00000000926	HSP90B1	mRNA	chr5:84082879-84083870	endoplasmin precursor [Source:RefSeq peptide;Acc:NP_999268]	GO:0070062(extracellular exosome);GO:0048471(perinuclear region of cytoplasm);GO:0034663(endoplasmic reticulum chaperone complex);GO:0031012(extracellular matrix);GO:0030496(midbody);GO:0016020(membrane);GO:0005925(focal adhesion);GO:0005886(plasma membrane);GO:0005829(cytosol);GO:0005789(endoplasmic reticulum membrane);GO:0005788(endoplasmic reticulum lumen);GO:0005783(endoplasmic reticulum);GO:…	NA	ssc-miR-345-3p	m8	-0.156	66	141	-20.46
ciRNA159	chr5	84082909	84083870	-	1	ciRNA	-	ENSSSCT00000000926	HSP90B1	mRNA	chr5:84082879-84083870	endoplasmin precursor [Source:RefSeq peptide;Acc:NP_999268]	GO:0070062(extracellular exosome);GO:0048471(perinuclear region of cytoplasm);GO:0034663(endoplasmic reticulum chaperone complex);GO:0031012(extracellular matrix);GO:0030496(midbody);GO:0016020(membrane);GO:0005925(focal adhesion);GO:0005886(plasma membrane);GO:0005829(cytosol);GO:0005789(endoplasmic reticulum membrane);GO:0005788(endoplasmic reticulum lumen);GO:0005783(endoplasmic reticulum);GO:…	NA	ssc-miR-371-5p	m8	-0.178	69	157	-21.1
ciRNA159	chr5	84082909	84083870	-	1	ciRNA	-	ENSSSCT00000000926	HSP90B1	mRNA	chr5:84082879-84083870	endoplasmin precursor [Source:RefSeq peptide;Acc:NP_999268]	GO:0070062(extracellular exosome);GO:0048471(perinuclear region of cytoplasm);GO:0034663(endoplasmic reticulum chaperone complex);GO:0031012(extracellular matrix);GO:0030496(midbody);GO:0016020(membrane);GO:0005925(focal adhesion);GO:0005886(plasma membrane);GO:0005829(cytosol);GO:0005789(endoplasmic reticulum membrane);GO:0005788(endoplasmic reticulum lumen);GO:0005783(endoplasmic reticulum);GO:…	NA	ssc-miR-484	8mer	-0.3333	94	148	-40.49
ciRNA159	chr5	84082909	84083870	-	1	ciRNA	-	ENSSSCT00000000926	HSP90B1	mRNA	chr5:84082879-84083870	endoplasmin precursor [Source:RefSeq peptide;Acc:NP_999268]	GO:0070062(extracellular exosome);GO:0048471(perinuclear region of cytoplasm);GO:0034663(endoplasmic reticulum chaperone complex);GO:0031012(extracellular matrix);GO:0030496(midbody);GO:0016020(membrane);GO:0005925(focal adhesion);GO:0005886(plasma membrane);GO:0005829(cytosol);GO:0005789(endoplasmic reticulum membrane);GO:0005788(endoplasmic reticulum lumen);GO:0005783(endoplasmic reticulum);GO:…	NA	ssc-miR-491	m8	-0.2045	72	140	-16.04
ciRNA159	chr5	84082909	84083870	-	1	ciRNA	-	ENSSSCT00000000926	HSP90B1	mRNA	chr5:84082879-84083870	endoplasmin precursor [Source:RefSeq peptide;Acc:NP_999268]	GO:0070062(extracellular exosome);GO:0048471(perinuclear region of cytoplasm);GO:0034663(endoplasmic reticulum chaperone complex);GO:0031012(extracellular matrix);GO:0030496(midbody);GO:0016020(membrane);GO:0005925(focal adhesion);GO:0005886(plasma membrane);GO:0005829(cytosol);GO:0005789(endoplasmic reticulum membrane);GO:0005788(endoplasmic reticulum lumen);GO:0005783(endoplasmic reticulum);GO:…	NA	ssc-miR-7144-5p	1a	-0.14365	50	146	-23.99
ciRNA159	chr5	84082909	84083870	-	1	ciRNA	-	ENSSSCT00000000926	HSP90B1	mRNA	chr5:84082879-84083870	endoplasmin precursor [Source:RefSeq peptide;Acc:NP_999268]	GO:0070062(extracellular exosome);GO:0048471(perinuclear region of cytoplasm);GO:0034663(endoplasmic reticulum chaperone complex);GO:0031012(extracellular matrix);GO:0030496(midbody);GO:0016020(membrane);GO:0005925(focal adhesion);GO:0005886(plasma membrane);GO:0005829(cytosol);GO:0005789(endoplasmic reticulum membrane);GO:0005788(endoplasmic reticulum lumen);GO:0005783(endoplasmic reticulum);GO:…	NA	ssc-miR-9790-3p	m8	-0.129	50	152	-15.54
ciRNA159	chr5	84082909	84083870	-	1	ciRNA	-	ENSSSCT00000000926	HSP90B1	mRNA	chr5:84082879-84083870	endoplasmin precursor [Source:RefSeq peptide;Acc:NP_999268]	GO:0070062(extracellular exosome);GO:0048471(perinuclear region of cytoplasm);GO:0034663(endoplasmic reticulum chaperone complex);GO:0031012(extracellular matrix);GO:0030496(midbody);GO:0016020(membrane);GO:0005925(focal adhesion);GO:0005886(plasma membrane);GO:0005829(cytosol);GO:0005789(endoplasmic reticulum membrane);GO:0005788(endoplasmic reticulum lumen);GO:0005783(endoplasmic reticulum);GO:…	NA	ssc-miR-9795-3p	m8	-0.223	81	145	-10.75
ciRNA159	chr5	84082909	84083870	-	1	ciRNA	-	ENSSSCT00000000926	HSP90B1	mRNA	chr5:84082879-84083870	endoplasmin precursor [Source:RefSeq peptide;Acc:NP_999268]	GO:0070062(extracellular exosome);GO:0048471(perinuclear region of cytoplasm);GO:0034663(endoplasmic reticulum chaperone complex);GO:0031012(extracellular matrix);GO:0030496(midbody);GO:0016020(membrane);GO:0005925(focal adhesion);GO:0005886(plasma membrane);GO:0005829(cytosol);GO:0005789(endoplasmic reticulum membrane);GO:0005788(endoplasmic reticulum lumen);GO:0005783(endoplasmic reticulum);GO:…	NA	ssc-miR-9798-3p	m8	-0.1575	61	146	-16.5
ciRNA159	chr5	84082909	84083870	-	1	ciRNA	-	ENSSSCT00000000926	HSP90B1	mRNA	chr5:84082879-84083870	endoplasmin precursor [Source:RefSeq peptide;Acc:NP_999268]	GO:0070062(extracellular exosome);GO:0048471(perinuclear region of cytoplasm);GO:0034663(endoplasmic reticulum chaperone complex);GO:0031012(extracellular matrix);GO:0030496(midbody);GO:0016020(membrane);GO:0005925(focal adhesion);GO:0005886(plasma membrane);GO:0005829(cytosol);GO:0005789(endoplasmic reticulum membrane);GO:0005788(endoplasmic reticulum lumen);GO:0005783(endoplasmic reticulum);GO:…	NA	ssc-miR-9802-3p	m8	-0.2755	91	159	-21.6
ciRNA159	chr5	84082909	84083870	-	1	ciRNA	-	ENSSSCT00000000926	HSP90B1	mRNA	chr5:84082879-84083870	endoplasmin precursor [Source:RefSeq peptide;Acc:NP_999268]	GO:0070062(extracellular exosome);GO:0048471(perinuclear region of cytoplasm);GO:0034663(endoplasmic reticulum chaperone complex);GO:0031012(extracellular matrix);GO:0030496(midbody);GO:0016020(membrane);GO:0005925(focal adhesion);GO:0005886(plasma membrane);GO:0005829(cytosol);GO:0005789(endoplasmic reticulum membrane);GO:0005788(endoplasmic reticulum lumen);GO:0005783(endoplasmic reticulum);GO:…	NA	ssc-miR-9826-5p	m8	-0.174	62	148	-16.12
ciRNA159	chr5	84082909	84083870	-	1	ciRNA	-	ENSSSCT00000000926	HSP90B1	mRNA	chr5:84082879-84083870	endoplasmin precursor [Source:RefSeq peptide;Acc:NP_999268]	GO:0070062(extracellular exosome);GO:0048471(perinuclear region of cytoplasm);GO:0034663(endoplasmic reticulum chaperone complex);GO:0031012(extracellular matrix);GO:0030496(midbody);GO:0016020(membrane);GO:0005925(focal adhesion);GO:0005886(plasma membrane);GO:0005829(cytosol);GO:0005789(endoplasmic reticulum membrane);GO:0005788(endoplasmic reticulum lumen);GO:0005783(endoplasmic reticulum);GO:…	NA	ssc-miR-9832-3p	m8	-0.3035	87	148	-15.88
ciRNA160	chr5	110741792	110742168	-	1	ciRNA	-	ENSSSCT00000001066	MOV10L1	mRNA	chr5:110741769-110742168	Mov10 RISC complex RNA helicase like 1 [Source:HGNC Symbol;Acc:HGNC:7201]	GO:0007283(spermatogenesis);GO:0007281(germ cell development)	NA	ssc-miR-339-3p	m8	-0.138	51	154	-29.38
ciRNA160	chr5	110741792	110742168	-	1	ciRNA	-	ENSSSCT00000001066	MOV10L1	mRNA	chr5:110741769-110742168	Mov10 RISC complex RNA helicase like 1 [Source:HGNC Symbol;Acc:HGNC:7201]	GO:0007283(spermatogenesis);GO:0007281(germ cell development)	NA	ssc-miR-484	8mer	-0.1863	83	152	-29.79
ciRNA160	chr5	110741792	110742168	-	1	ciRNA	-	ENSSSCT00000001066	MOV10L1	mRNA	chr5:110741769-110742168	Mov10 RISC complex RNA helicase like 1 [Source:HGNC Symbol;Acc:HGNC:7201]	GO:0007283(spermatogenesis);GO:0007281(germ cell development)	NA	ssc-miR-7137-3p	m8	-0.159	60	156	-24.12
ciRNA160	chr5	110741792	110742168	-	1	ciRNA	-	ENSSSCT00000001066	MOV10L1	mRNA	chr5:110741769-110742168	Mov10 RISC complex RNA helicase like 1 [Source:HGNC Symbol;Acc:HGNC:7201]	GO:0007283(spermatogenesis);GO:0007281(germ cell development)	NA	ssc-miR-744	m8	-0.0875	62	152	-26.02
ciRNA160	chr5	110741792	110742168	-	1	ciRNA	-	ENSSSCT00000001066	MOV10L1	mRNA	chr5:110741769-110742168	Mov10 RISC complex RNA helicase like 1 [Source:HGNC Symbol;Acc:HGNC:7201]	GO:0007283(spermatogenesis);GO:0007281(germ cell development)	NA	ssc-miR-9846-3p	8mer	-0.2432	84	149	-21.82
ciRNA161	chr4	106522183	106522354	-	1	ciRNA	-	ENSSSCT00000024550	ENSSSCG00000026844	mRNA	chr4:106521783-106522354	NA	NA	NA	ssc-miR-27a	1a	-0.1553	61	147	-21.62
ciRNA161	chr4	106522183	106522354	-	1	ciRNA	-	ENSSSCT00000024550	ENSSSCG00000026844	mRNA	chr4:106521783-106522354	NA	NA	NA	ssc-miR-27b-3p	1a	-0.1553	61	143	-18.76
ciRNA161	chr4	106522183	106522354	-	1	ciRNA	-	ENSSSCT00000024550	ENSSSCG00000026844	mRNA	chr4:106521783-106522354	NA	NA	NA	ssc-miR-505	8mer	-0.37625	94	161	-24.36
ciRNA161	chr4	106522183	106522354	-	1	ciRNA	-	ENSSSCT00000024550	ENSSSCG00000026844	mRNA	chr4:106521783-106522354	NA	NA	NA	ssc-miR-7135-3p	m8	-0.1965	65	152	-20.3
ciRNA161	chr4	106522183	106522354	-	1	ciRNA	-	ENSSSCT00000024550	ENSSSCG00000026844	mRNA	chr4:106521783-106522354	NA	NA	NA	ssc-miR-7140-5p	m8	-0.188	59	141	-10.66
ciRNA162	chr2	3972239	3972409	-	1	ciRNA	-	ENSSSCT00000026537	SSH3	mRNA	chr2:3972216-3972409	slingshot protein phosphatase 3 [Source:HGNC Symbol;Acc:HGNC:30581]	GO:0005856(cytoskeleton);GO:0005737(cytoplasm);GO:0050770(regulation of axonogenesis);GO:0035335(peptidyl-tyrosine dephosphorylation);GO:0016311(dephosphorylation);GO:0010591(regulation of lamellipodium assembly);GO:0008064(regulation of actin polymerization or depolymerization);GO:0006470(protein dephosphorylation);GO:0016791(phosphatase activity);GO:0008138(protein tyrosine/serine/threonine pho…	NA	ssc-miR-296-5p	m8	-0.1	51	151	-27.63
ciRNA162	chr2	3972239	3972409	-	1	ciRNA	-	ENSSSCT00000026537	SSH3	mRNA	chr2:3972216-3972409	slingshot protein phosphatase 3 [Source:HGNC Symbol;Acc:HGNC:30581]	GO:0005856(cytoskeleton);GO:0005737(cytoplasm);GO:0050770(regulation of axonogenesis);GO:0035335(peptidyl-tyrosine dephosphorylation);GO:0016311(dephosphorylation);GO:0010591(regulation of lamellipodium assembly);GO:0008064(regulation of actin polymerization or depolymerization);GO:0006470(protein dephosphorylation);GO:0016791(phosphatase activity);GO:0008138(protein tyrosine/serine/threonine pho…	NA	ssc-miR-320	8mer	-0.22315	75	146	-18.95
ciRNA162	chr2	3972239	3972409	-	1	ciRNA	-	ENSSSCT00000026537	SSH3	mRNA	chr2:3972216-3972409	slingshot protein phosphatase 3 [Source:HGNC Symbol;Acc:HGNC:30581]	GO:0005856(cytoskeleton);GO:0005737(cytoplasm);GO:0050770(regulation of axonogenesis);GO:0035335(peptidyl-tyrosine dephosphorylation);GO:0016311(dephosphorylation);GO:0010591(regulation of lamellipodium assembly);GO:0008064(regulation of actin polymerization or depolymerization);GO:0006470(protein dephosphorylation);GO:0016791(phosphatase activity);GO:0008138(protein tyrosine/serine/threonine pho…	NA	ssc-miR-381	8mer	-0.2272	80	159	-22.27
ciRNA163	chr2	69312926	69313265	-	1	ciRNA	-	ENSSSCT00000014923	DNMT1	mRNA	chr2:69312895-69313265	DNA methyltransferase 1 [Source:HGNC Symbol;Acc:HGNC:2976]	GO:0005721(pericentric heterochromatin);GO:0005657(replication fork);GO:0005634(nucleus);GO:0000792(heterochromatin);GO:0090309(positive regulation of methylation-dependent chromatin silencing);GO:0090116(C-5 methylation of cytosine);GO:0071230(cellular response to amino acid stimulus);GO:0051573(negative regulation of histone H3-K9 methylation);GO:0051571(positive regulation of histone H3-K4 met…	00270(Cysteine and methionine metabolism);05206(MicroRNAs in cancer)	ssc-miR-1343	m8	-0.134	57	150	-25.55
ciRNA163	chr2	69312926	69313265	-	1	ciRNA	-	ENSSSCT00000014923	DNMT1	mRNA	chr2:69312895-69313265	DNA methyltransferase 1 [Source:HGNC Symbol;Acc:HGNC:2976]	GO:0005721(pericentric heterochromatin);GO:0005657(replication fork);GO:0005634(nucleus);GO:0000792(heterochromatin);GO:0090309(positive regulation of methylation-dependent chromatin silencing);GO:0090116(C-5 methylation of cytosine);GO:0071230(cellular response to amino acid stimulus);GO:0051573(negative regulation of histone H3-K9 methylation);GO:0051571(positive regulation of histone H3-K4 met…	00270(Cysteine and methionine metabolism);05206(MicroRNAs in cancer)	ssc-miR-196b-3p	8mer	-0.26215	80	144	-11.42
ciRNA163	chr2	69312926	69313265	-	1	ciRNA	-	ENSSSCT00000014923	DNMT1	mRNA	chr2:69312895-69313265	DNA methyltransferase 1 [Source:HGNC Symbol;Acc:HGNC:2976]	GO:0005721(pericentric heterochromatin);GO:0005657(replication fork);GO:0005634(nucleus);GO:0000792(heterochromatin);GO:0090309(positive regulation of methylation-dependent chromatin silencing);GO:0090116(C-5 methylation of cytosine);GO:0071230(cellular response to amino acid stimulus);GO:0051573(negative regulation of histone H3-K9 methylation);GO:0051571(positive regulation of histone H3-K4 met…	00270(Cysteine and methionine metabolism);05206(MicroRNAs in cancer)	ssc-miR-212	8mer	-0.32735	88	169	-28.04
ciRNA163	chr2	69312926	69313265	-	1	ciRNA	-	ENSSSCT00000014923	DNMT1	mRNA	chr2:69312895-69313265	DNA methyltransferase 1 [Source:HGNC Symbol;Acc:HGNC:2976]	GO:0005721(pericentric heterochromatin);GO:0005657(replication fork);GO:0005634(nucleus);GO:0000792(heterochromatin);GO:0090309(positive regulation of methylation-dependent chromatin silencing);GO:0090116(C-5 methylation of cytosine);GO:0071230(cellular response to amino acid stimulus);GO:0051573(negative regulation of histone H3-K9 methylation);GO:0051571(positive regulation of histone H3-K4 met…	00270(Cysteine and methionine metabolism);05206(MicroRNAs in cancer)	ssc-miR-24-3p	8mer	-0.3292	94	144	-22.02
ciRNA163	chr2	69312926	69313265	-	1	ciRNA	-	ENSSSCT00000014923	DNMT1	mRNA	chr2:69312895-69313265	DNA methyltransferase 1 [Source:HGNC Symbol;Acc:HGNC:2976]	GO:0005721(pericentric heterochromatin);GO:0005657(replication fork);GO:0005634(nucleus);GO:0000792(heterochromatin);GO:0090309(positive regulation of methylation-dependent chromatin silencing);GO:0090116(C-5 methylation of cytosine);GO:0071230(cellular response to amino acid stimulus);GO:0051573(negative regulation of histone H3-K9 methylation);GO:0051571(positive regulation of histone H3-K4 met…	00270(Cysteine and methionine metabolism);05206(MicroRNAs in cancer)	ssc-miR-34a	m8	-0.151	54	151	-24.21
ciRNA163	chr2	69312926	69313265	-	1	ciRNA	-	ENSSSCT00000014923	DNMT1	mRNA	chr2:69312895-69313265	DNA methyltransferase 1 [Source:HGNC Symbol;Acc:HGNC:2976]	GO:0005721(pericentric heterochromatin);GO:0005657(replication fork);GO:0005634(nucleus);GO:0000792(heterochromatin);GO:0090309(positive regulation of methylation-dependent chromatin silencing);GO:0090116(C-5 methylation of cytosine);GO:0071230(cellular response to amino acid stimulus);GO:0051573(negative regulation of histone H3-K9 methylation);GO:0051571(positive regulation of histone H3-K4 met…	00270(Cysteine and methionine metabolism);05206(MicroRNAs in cancer)	ssc-miR-423-5p	8mer	-0.32215	94	151	-24.03
ciRNA163	chr2	69312926	69313265	-	1	ciRNA	-	ENSSSCT00000014923	DNMT1	mRNA	chr2:69312895-69313265	DNA methyltransferase 1 [Source:HGNC Symbol;Acc:HGNC:2976]	GO:0005721(pericentric heterochromatin);GO:0005657(replication fork);GO:0005634(nucleus);GO:0000792(heterochromatin);GO:0090309(positive regulation of methylation-dependent chromatin silencing);GO:0090116(C-5 methylation of cytosine);GO:0071230(cellular response to amino acid stimulus);GO:0051573(negative regulation of histone H3-K9 methylation);GO:0051571(positive regulation of histone H3-K4 met…	00270(Cysteine and methionine metabolism);05206(MicroRNAs in cancer)	ssc-miR-4335	m8	-0.193	76	159	-28.66
ciRNA163	chr2	69312926	69313265	-	1	ciRNA	-	ENSSSCT00000014923	DNMT1	mRNA	chr2:69312895-69313265	DNA methyltransferase 1 [Source:HGNC Symbol;Acc:HGNC:2976]	GO:0005721(pericentric heterochromatin);GO:0005657(replication fork);GO:0005634(nucleus);GO:0000792(heterochromatin);GO:0090309(positive regulation of methylation-dependent chromatin silencing);GO:0090116(C-5 methylation of cytosine);GO:0071230(cellular response to amino acid stimulus);GO:0051573(negative regulation of histone H3-K9 methylation);GO:0051571(positive regulation of histone H3-K4 met…	00270(Cysteine and methionine metabolism);05206(MicroRNAs in cancer)	ssc-miR-6782-3p	m8	-0.15	62	144	-19.91
ciRNA163	chr2	69312926	69313265	-	1	ciRNA	-	ENSSSCT00000014923	DNMT1	mRNA	chr2:69312895-69313265	DNA methyltransferase 1 [Source:HGNC Symbol;Acc:HGNC:2976]	GO:0005721(pericentric heterochromatin);GO:0005657(replication fork);GO:0005634(nucleus);GO:0000792(heterochromatin);GO:0090309(positive regulation of methylation-dependent chromatin silencing);GO:0090116(C-5 methylation of cytosine);GO:0071230(cellular response to amino acid stimulus);GO:0051573(negative regulation of histone H3-K9 methylation);GO:0051571(positive regulation of histone H3-K4 met…	00270(Cysteine and methionine metabolism);05206(MicroRNAs in cancer)	ssc-miR-7139-3p	m8	-0.1445	54	155	-28.76
ciRNA163	chr2	69312926	69313265	-	1	ciRNA	-	ENSSSCT00000014923	DNMT1	mRNA	chr2:69312895-69313265	DNA methyltransferase 1 [Source:HGNC Symbol;Acc:HGNC:2976]	GO:0005721(pericentric heterochromatin);GO:0005657(replication fork);GO:0005634(nucleus);GO:0000792(heterochromatin);GO:0090309(positive regulation of methylation-dependent chromatin silencing);GO:0090116(C-5 methylation of cytosine);GO:0071230(cellular response to amino acid stimulus);GO:0051573(negative regulation of histone H3-K9 methylation);GO:0051571(positive regulation of histone H3-K4 met…	00270(Cysteine and methionine metabolism);05206(MicroRNAs in cancer)	ssc-miR-7144-3p	m8	-0.157	63	162	-23
ciRNA163	chr2	69312926	69313265	-	1	ciRNA	-	ENSSSCT00000014923	DNMT1	mRNA	chr2:69312895-69313265	DNA methyltransferase 1 [Source:HGNC Symbol;Acc:HGNC:2976]	GO:0005721(pericentric heterochromatin);GO:0005657(replication fork);GO:0005634(nucleus);GO:0000792(heterochromatin);GO:0090309(positive regulation of methylation-dependent chromatin silencing);GO:0090116(C-5 methylation of cytosine);GO:0071230(cellular response to amino acid stimulus);GO:0051573(negative regulation of histone H3-K9 methylation);GO:0051571(positive regulation of histone H3-K4 met…	00270(Cysteine and methionine metabolism);05206(MicroRNAs in cancer)	ssc-miR-9840-3p	m8	-0.144	59	158	-29.01
ciRNA164	chr1	9361463	9361743	-	1	ciRNA	-	ENSSSCT00000004474	PNLDC1	mRNA	chr1:9361435-9361743	PARN like, ribonuclease domain containing 1 [Source:HGNC Symbol;Acc:HGNC:21185]	GO:0005783(endoplasmic reticulum);GO:0090503(RNA phosphodiester bond hydrolysis, exonucleolytic);GO:0000289(nuclear-transcribed mRNA poly(A) tail shortening);GO:0004535(poly(A)-specific ribonuclease activity);GO:0003676(nucleic acid binding)	NA	ssc-miR-221-5p	8mer	-0.27615	85	149	-16.21
ciRNA165	chr1	118506275	118506495	-	1	ciRNA	-	ENSSSCT00000005031	ENSSSCG00000004554	mRNA	chr1:118506246-118506495	NA	GO:0051726(regulation of cell cycle);GO:0006974(cellular response to DNA damage stimulus)	NA	ssc-miR-491	8mer	-0.1452	59	154	-22.67
ciRNA165	chr1	118506275	118506495	-	1	ciRNA	-	ENSSSCT00000005031	ENSSSCG00000004554	mRNA	chr1:118506246-118506495	NA	GO:0051726(regulation of cell cycle);GO:0006974(cellular response to DNA damage stimulus)	NA	ssc-miR-9816-3p	m8	-0.136	52	145	-22.44
ciRNA166	chr8	297603	298048	-	1	ciRNA	-	ENSSSCT00000009494	TACC3	mRNA	chr8:297567-298048	transforming acidic coiled-coil containing protein 3 [Source:HGNC Symbol;Acc:HGNC:11524]	GO:0015630(microtubule cytoskeleton);GO:0005737(cytoplasm);GO:1902850(microtubule cytoskeleton organization involved in mitosis);GO:0060236(regulation of mitotic spindle organization);GO:0021987(cerebral cortex development);GO:0008283(cell proliferation);GO:0007091(metaphase/anaphase transition of mitotic cell cycle);GO:0000226(microtubule cytoskeleton organization)	03013(RNA transport)	ssc-miR-4332	m8	-0.0935	51	143	-31.24
ciRNA167	chr13	38423823	38424975	-	1	ciRNA	-	ENSSSCT00000025213	TKT	mRNA	chr13:38423786-38424975	transketolase [Source:HGNC Symbol;Acc:HGNC:11834]	GO:0070062(extracellular exosome);GO:0043209(myelin sheath);GO:0031982(vesicle);GO:0016607(nuclear speck);GO:0016604(nuclear body);GO:0005654(nucleoplasm);GO:0046166(glyceraldehyde-3-phosphate biosynthetic process);GO:0040008(regulation of growth);GO:0008152(metabolic process);GO:0048037(cofactor binding);GO:0046872(metal ion binding);GO:0042803(protein homodimerization activity);GO:0016740(trans…	01200(Carbon metabolism);01230(Biosynthesis of amino acids);00030(Pentose phosphate pathway);00900(Terpenoid backbone biosynthesis)	ssc-miR-1296-3p	m8	-0.174	71	166	-26.59
ciRNA167	chr13	38423823	38424975	-	1	ciRNA	-	ENSSSCT00000025213	TKT	mRNA	chr13:38423786-38424975	transketolase [Source:HGNC Symbol;Acc:HGNC:11834]	GO:0070062(extracellular exosome);GO:0043209(myelin sheath);GO:0031982(vesicle);GO:0016607(nuclear speck);GO:0016604(nuclear body);GO:0005654(nucleoplasm);GO:0046166(glyceraldehyde-3-phosphate biosynthetic process);GO:0040008(regulation of growth);GO:0008152(metabolic process);GO:0048037(cofactor binding);GO:0046872(metal ion binding);GO:0042803(protein homodimerization activity);GO:0016740(trans…	01200(Carbon metabolism);01230(Biosynthesis of amino acids);00030(Pentose phosphate pathway);00900(Terpenoid backbone biosynthesis)	ssc-miR-185	8mer	-0.1822	69	155	-23.7
ciRNA167	chr13	38423823	38424975	-	1	ciRNA	-	ENSSSCT00000025213	TKT	mRNA	chr13:38423786-38424975	transketolase [Source:HGNC Symbol;Acc:HGNC:11834]	GO:0070062(extracellular exosome);GO:0043209(myelin sheath);GO:0031982(vesicle);GO:0016607(nuclear speck);GO:0016604(nuclear body);GO:0005654(nucleoplasm);GO:0046166(glyceraldehyde-3-phosphate biosynthetic process);GO:0040008(regulation of growth);GO:0008152(metabolic process);GO:0048037(cofactor binding);GO:0046872(metal ion binding);GO:0042803(protein homodimerization activity);GO:0016740(trans…	01200(Carbon metabolism);01230(Biosynthesis of amino acids);00030(Pentose phosphate pathway);00900(Terpenoid backbone biosynthesis)	ssc-miR-2320-5p	m8	-0.144	55	163	-26.07
ciRNA167	chr13	38423823	38424975	-	1	ciRNA	-	ENSSSCT00000025213	TKT	mRNA	chr13:38423786-38424975	transketolase [Source:HGNC Symbol;Acc:HGNC:11834]	GO:0070062(extracellular exosome);GO:0043209(myelin sheath);GO:0031982(vesicle);GO:0016607(nuclear speck);GO:0016604(nuclear body);GO:0005654(nucleoplasm);GO:0046166(glyceraldehyde-3-phosphate biosynthetic process);GO:0040008(regulation of growth);GO:0008152(metabolic process);GO:0048037(cofactor binding);GO:0046872(metal ion binding);GO:0042803(protein homodimerization activity);GO:0016740(trans…	01200(Carbon metabolism);01230(Biosynthesis of amino acids);00030(Pentose phosphate pathway);00900(Terpenoid backbone biosynthesis)	ssc-miR-24-3p	8mer	-0.2062	80	148	-22
ciRNA167	chr13	38423823	38424975	-	1	ciRNA	-	ENSSSCT00000025213	TKT	mRNA	chr13:38423786-38424975	transketolase [Source:HGNC Symbol;Acc:HGNC:11834]	GO:0070062(extracellular exosome);GO:0043209(myelin sheath);GO:0031982(vesicle);GO:0016607(nuclear speck);GO:0016604(nuclear body);GO:0005654(nucleoplasm);GO:0046166(glyceraldehyde-3-phosphate biosynthetic process);GO:0040008(regulation of growth);GO:0008152(metabolic process);GO:0048037(cofactor binding);GO:0046872(metal ion binding);GO:0042803(protein homodimerization activity);GO:0016740(trans…	01200(Carbon metabolism);01230(Biosynthesis of amino acids);00030(Pentose phosphate pathway);00900(Terpenoid backbone biosynthesis)	ssc-miR-30b-3p	8mer	-0.1692	69	146	-19.63
ciRNA167	chr13	38423823	38424975	-	1	ciRNA	-	ENSSSCT00000025213	TKT	mRNA	chr13:38423786-38424975	transketolase [Source:HGNC Symbol;Acc:HGNC:11834]	GO:0070062(extracellular exosome);GO:0043209(myelin sheath);GO:0031982(vesicle);GO:0016607(nuclear speck);GO:0016604(nuclear body);GO:0005654(nucleoplasm);GO:0046166(glyceraldehyde-3-phosphate biosynthetic process);GO:0040008(regulation of growth);GO:0008152(metabolic process);GO:0048037(cofactor binding);GO:0046872(metal ion binding);GO:0042803(protein homodimerization activity);GO:0016740(trans…	01200(Carbon metabolism);01230(Biosynthesis of amino acids);00030(Pentose phosphate pathway);00900(Terpenoid backbone biosynthesis)	ssc-miR-4334-5p	m8	-0.134	60	156	-24.29
ciRNA167	chr13	38423823	38424975	-	1	ciRNA	-	ENSSSCT00000025213	TKT	mRNA	chr13:38423786-38424975	transketolase [Source:HGNC Symbol;Acc:HGNC:11834]	GO:0070062(extracellular exosome);GO:0043209(myelin sheath);GO:0031982(vesicle);GO:0016607(nuclear speck);GO:0016604(nuclear body);GO:0005654(nucleoplasm);GO:0046166(glyceraldehyde-3-phosphate biosynthetic process);GO:0040008(regulation of growth);GO:0008152(metabolic process);GO:0048037(cofactor binding);GO:0046872(metal ion binding);GO:0042803(protein homodimerization activity);GO:0016740(trans…	01200(Carbon metabolism);01230(Biosynthesis of amino acids);00030(Pentose phosphate pathway);00900(Terpenoid backbone biosynthesis)	ssc-miR-4339	m8	-0.1615	64	155	-19.84
ciRNA167	chr13	38423823	38424975	-	1	ciRNA	-	ENSSSCT00000025213	TKT	mRNA	chr13:38423786-38424975	transketolase [Source:HGNC Symbol;Acc:HGNC:11834]	GO:0070062(extracellular exosome);GO:0043209(myelin sheath);GO:0031982(vesicle);GO:0016607(nuclear speck);GO:0016604(nuclear body);GO:0005654(nucleoplasm);GO:0046166(glyceraldehyde-3-phosphate biosynthetic process);GO:0040008(regulation of growth);GO:0008152(metabolic process);GO:0048037(cofactor binding);GO:0046872(metal ion binding);GO:0042803(protein homodimerization activity);GO:0016740(trans…	01200(Carbon metabolism);01230(Biosynthesis of amino acids);00030(Pentose phosphate pathway);00900(Terpenoid backbone biosynthesis)	ssc-miR-490-5p	8mer	-0.3062	92	148	-15.81
ciRNA167	chr13	38423823	38424975	-	1	ciRNA	-	ENSSSCT00000025213	TKT	mRNA	chr13:38423786-38424975	transketolase [Source:HGNC Symbol;Acc:HGNC:11834]	GO:0070062(extracellular exosome);GO:0043209(myelin sheath);GO:0031982(vesicle);GO:0016607(nuclear speck);GO:0016604(nuclear body);GO:0005654(nucleoplasm);GO:0046166(glyceraldehyde-3-phosphate biosynthetic process);GO:0040008(regulation of growth);GO:0008152(metabolic process);GO:0048037(cofactor binding);GO:0046872(metal ion binding);GO:0042803(protein homodimerization activity);GO:0016740(trans…	01200(Carbon metabolism);01230(Biosynthesis of amino acids);00030(Pentose phosphate pathway);00900(Terpenoid backbone biosynthesis)	ssc-miR-491	8mer	-0.21215	74	149	-25.2
ciRNA167	chr13	38423823	38424975	-	1	ciRNA	-	ENSSSCT00000025213	TKT	mRNA	chr13:38423786-38424975	transketolase [Source:HGNC Symbol;Acc:HGNC:11834]	GO:0070062(extracellular exosome);GO:0043209(myelin sheath);GO:0031982(vesicle);GO:0016607(nuclear speck);GO:0016604(nuclear body);GO:0005654(nucleoplasm);GO:0046166(glyceraldehyde-3-phosphate biosynthetic process);GO:0040008(regulation of growth);GO:0008152(metabolic process);GO:0048037(cofactor binding);GO:0046872(metal ion binding);GO:0042803(protein homodimerization activity);GO:0016740(trans…	01200(Carbon metabolism);01230(Biosynthesis of amino acids);00030(Pentose phosphate pathway);00900(Terpenoid backbone biosynthesis)	ssc-miR-671-5p	8mer	-0.21005	76	161	-38.73
ciRNA167	chr13	38423823	38424975	-	1	ciRNA	-	ENSSSCT00000025213	TKT	mRNA	chr13:38423786-38424975	transketolase [Source:HGNC Symbol;Acc:HGNC:11834]	GO:0070062(extracellular exosome);GO:0043209(myelin sheath);GO:0031982(vesicle);GO:0016607(nuclear speck);GO:0016604(nuclear body);GO:0005654(nucleoplasm);GO:0046166(glyceraldehyde-3-phosphate biosynthetic process);GO:0040008(regulation of growth);GO:0008152(metabolic process);GO:0048037(cofactor binding);GO:0046872(metal ion binding);GO:0042803(protein homodimerization activity);GO:0016740(trans…	01200(Carbon metabolism);01230(Biosynthesis of amino acids);00030(Pentose phosphate pathway);00900(Terpenoid backbone biosynthesis)	ssc-miR-7139-3p	m8	-0.179	70	157	-28.07
ciRNA167	chr13	38423823	38424975	-	1	ciRNA	-	ENSSSCT00000025213	TKT	mRNA	chr13:38423786-38424975	transketolase [Source:HGNC Symbol;Acc:HGNC:11834]	GO:0070062(extracellular exosome);GO:0043209(myelin sheath);GO:0031982(vesicle);GO:0016607(nuclear speck);GO:0016604(nuclear body);GO:0005654(nucleoplasm);GO:0046166(glyceraldehyde-3-phosphate biosynthetic process);GO:0040008(regulation of growth);GO:0008152(metabolic process);GO:0048037(cofactor binding);GO:0046872(metal ion binding);GO:0042803(protein homodimerization activity);GO:0016740(trans…	01200(Carbon metabolism);01230(Biosynthesis of amino acids);00030(Pentose phosphate pathway);00900(Terpenoid backbone biosynthesis)	ssc-miR-7144-5p	8mer	-0.29215	91	146	-18
ciRNA167	chr13	38423823	38424975	-	1	ciRNA	-	ENSSSCT00000025213	TKT	mRNA	chr13:38423786-38424975	transketolase [Source:HGNC Symbol;Acc:HGNC:11834]	GO:0070062(extracellular exosome);GO:0043209(myelin sheath);GO:0031982(vesicle);GO:0016607(nuclear speck);GO:0016604(nuclear body);GO:0005654(nucleoplasm);GO:0046166(glyceraldehyde-3-phosphate biosynthetic process);GO:0040008(regulation of growth);GO:0008152(metabolic process);GO:0048037(cofactor binding);GO:0046872(metal ion binding);GO:0042803(protein homodimerization activity);GO:0016740(trans…	01200(Carbon metabolism);01230(Biosynthesis of amino acids);00030(Pentose phosphate pathway);00900(Terpenoid backbone biosynthesis)	ssc-miR-9788-3p	m8	-0.188	73	166	-23.58
ciRNA167	chr13	38423823	38424975	-	1	ciRNA	-	ENSSSCT00000025213	TKT	mRNA	chr13:38423786-38424975	transketolase [Source:HGNC Symbol;Acc:HGNC:11834]	GO:0070062(extracellular exosome);GO:0043209(myelin sheath);GO:0031982(vesicle);GO:0016607(nuclear speck);GO:0016604(nuclear body);GO:0005654(nucleoplasm);GO:0046166(glyceraldehyde-3-phosphate biosynthetic process);GO:0040008(regulation of growth);GO:0008152(metabolic process);GO:0048037(cofactor binding);GO:0046872(metal ion binding);GO:0042803(protein homodimerization activity);GO:0016740(trans…	01200(Carbon metabolism);01230(Biosynthesis of amino acids);00030(Pentose phosphate pathway);00900(Terpenoid backbone biosynthesis)	ssc-miR-9820-5p	8mer	-0.2793	92	147	-21.83
ciRNA167	chr13	38423823	38424975	-	1	ciRNA	-	ENSSSCT00000025213	TKT	mRNA	chr13:38423786-38424975	transketolase [Source:HGNC Symbol;Acc:HGNC:11834]	GO:0070062(extracellular exosome);GO:0043209(myelin sheath);GO:0031982(vesicle);GO:0016607(nuclear speck);GO:0016604(nuclear body);GO:0005654(nucleoplasm);GO:0046166(glyceraldehyde-3-phosphate biosynthetic process);GO:0040008(regulation of growth);GO:0008152(metabolic process);GO:0048037(cofactor binding);GO:0046872(metal ion binding);GO:0042803(protein homodimerization activity);GO:0016740(trans…	01200(Carbon metabolism);01230(Biosynthesis of amino acids);00030(Pentose phosphate pathway);00900(Terpenoid backbone biosynthesis)	ssc-miR-9842-5p	8mer	-0.27215	85	146	-19.69
ciRNA167	chr13	38423823	38424975	-	1	ciRNA	-	ENSSSCT00000025213	TKT	mRNA	chr13:38423786-38424975	transketolase [Source:HGNC Symbol;Acc:HGNC:11834]	GO:0070062(extracellular exosome);GO:0043209(myelin sheath);GO:0031982(vesicle);GO:0016607(nuclear speck);GO:0016604(nuclear body);GO:0005654(nucleoplasm);GO:0046166(glyceraldehyde-3-phosphate biosynthetic process);GO:0040008(regulation of growth);GO:0008152(metabolic process);GO:0048037(cofactor binding);GO:0046872(metal ion binding);GO:0042803(protein homodimerization activity);GO:0016740(trans…	01200(Carbon metabolism);01230(Biosynthesis of amino acids);00030(Pentose phosphate pathway);00900(Terpenoid backbone biosynthesis)	ssc-miR-9846-3p	m8	-0.1495	61	160	-24.5
ciRNA168	chr13	78380412	78380595	+	1	ciRNA	-	ENSSSCT00000024978	ENSSSCG00000028031	mRNA	chr13:78380411-78380623	NA	GO:0016787(hydrolase activity)	NA	ssc-miR-361-3p	m8	-0.221	82	150	-23.11
ciRNA168	chr13	78380412	78380595	+	1	ciRNA	-	ENSSSCT00000024978	ENSSSCG00000028031	mRNA	chr13:78380411-78380623	NA	GO:0016787(hydrolase activity)	NA	ssc-miR-9847-3p	m8	-0.122	52	154	-30.37
ciRNA169	chr13	78560499	78560682	-	1	ciRNA	-	ENSSSCT00000012705	ENSSSCG00000011608	mRNA	chr13:78560470-78560682	NA	GO:0016787(hydrolase activity)	NA	ssc-miR-361-3p	m8	-0.221	82	150	-23.11
ciRNA169	chr13	78560499	78560682	-	1	ciRNA	-	ENSSSCT00000012705	ENSSSCG00000011608	mRNA	chr13:78560470-78560682	NA	GO:0016787(hydrolase activity)	NA	ssc-miR-9847-3p	m8	-0.122	52	154	-30.37
ciRNA17	chr9	7355578	7356055	-	1	ciRNA	-	ENSSSCT00000016153	NUMA1	mRNA	chr9:7355557-7356055	nuclear mitotic apparatus protein 1 [Source:HGNC Symbol;Acc:HGNC:8059]	GO:0097431(mitotic spindle pole);GO:0072686(mitotic spindle);GO:0070062(extracellular exosome);GO:0061673(mitotic spindle astral microtubule);GO:0045177(apical part of cell);GO:0016363(nuclear matrix);GO:0005938(cell cortex);GO:0005876(spindle microtubule);GO:0005829(cytosol);GO:0005813(centrosome);GO:0005654(nucleoplasm);GO:0005634(nucleus);GO:0000922(spindle pole);GO:0000139(Golgi membrane);GO:…	NA	ssc-miR-196b-3p	8mer	-0.1742	61	140	-16.04
ciRNA17	chr9	7355578	7356055	-	1	ciRNA	-	ENSSSCT00000016153	NUMA1	mRNA	chr9:7355557-7356055	nuclear mitotic apparatus protein 1 [Source:HGNC Symbol;Acc:HGNC:8059]	GO:0097431(mitotic spindle pole);GO:0072686(mitotic spindle);GO:0070062(extracellular exosome);GO:0061673(mitotic spindle astral microtubule);GO:0045177(apical part of cell);GO:0016363(nuclear matrix);GO:0005938(cell cortex);GO:0005876(spindle microtubule);GO:0005829(cytosol);GO:0005813(centrosome);GO:0005654(nucleoplasm);GO:0005634(nucleus);GO:0000922(spindle pole);GO:0000139(Golgi membrane);GO:…	NA	ssc-miR-342	m8	-0.1405	60	145	-19.73
ciRNA17	chr9	7355578	7356055	-	1	ciRNA	-	ENSSSCT00000016153	NUMA1	mRNA	chr9:7355557-7356055	nuclear mitotic apparatus protein 1 [Source:HGNC Symbol;Acc:HGNC:8059]	GO:0097431(mitotic spindle pole);GO:0072686(mitotic spindle);GO:0070062(extracellular exosome);GO:0061673(mitotic spindle astral microtubule);GO:0045177(apical part of cell);GO:0016363(nuclear matrix);GO:0005938(cell cortex);GO:0005876(spindle microtubule);GO:0005829(cytosol);GO:0005813(centrosome);GO:0005654(nucleoplasm);GO:0005634(nucleus);GO:0000922(spindle pole);GO:0000139(Golgi membrane);GO:…	NA	ssc-miR-423-5p	m8	-0.115	59	151	-20.74
ciRNA17	chr9	7355578	7356055	-	1	ciRNA	-	ENSSSCT00000016153	NUMA1	mRNA	chr9:7355557-7356055	nuclear mitotic apparatus protein 1 [Source:HGNC Symbol;Acc:HGNC:8059]	GO:0097431(mitotic spindle pole);GO:0072686(mitotic spindle);GO:0070062(extracellular exosome);GO:0061673(mitotic spindle astral microtubule);GO:0045177(apical part of cell);GO:0016363(nuclear matrix);GO:0005938(cell cortex);GO:0005876(spindle microtubule);GO:0005829(cytosol);GO:0005813(centrosome);GO:0005654(nucleoplasm);GO:0005634(nucleus);GO:0000922(spindle pole);GO:0000139(Golgi membrane);GO:…	NA	ssc-miR-7136-3p	m8	-0.128	54	159	-24.7
ciRNA17	chr9	7355578	7356055	-	1	ciRNA	-	ENSSSCT00000016153	NUMA1	mRNA	chr9:7355557-7356055	nuclear mitotic apparatus protein 1 [Source:HGNC Symbol;Acc:HGNC:8059]	GO:0097431(mitotic spindle pole);GO:0072686(mitotic spindle);GO:0070062(extracellular exosome);GO:0061673(mitotic spindle astral microtubule);GO:0045177(apical part of cell);GO:0016363(nuclear matrix);GO:0005938(cell cortex);GO:0005876(spindle microtubule);GO:0005829(cytosol);GO:0005813(centrosome);GO:0005654(nucleoplasm);GO:0005634(nucleus);GO:0000922(spindle pole);GO:0000139(Golgi membrane);GO:…	NA	ssc-miR-92b-5p	m8	-0.108	54	151	-26.86
ciRNA170	chr12	5514638	5516107	+	1	ciRNA	-	ENSSSCT00000030348	WBP2	mRNA	chr12:5514637-5516134	WW domain binding protein 2 [Source:HGNC Symbol;Acc:HGNC:12738]	GO:0000790(nuclear chromatin);GO:0071442(positive regulation of histone H3-K14 acetylation);GO:0071391(cellular response to estrogen stimulus);GO:0045944(positive regulation of transcription from RNA polymerase II promoter);GO:0045815(positive regulation of gene expression, epigenetic);GO:0045184(establishment of protein localization);GO:0031490(chromatin DNA binding);GO:0001105(RNA polymerase II…	NA	ssc-miR-124a	m8	-0.179	66	149	-16.72
ciRNA170	chr12	5514638	5516107	+	1	ciRNA	-	ENSSSCT00000030348	WBP2	mRNA	chr12:5514637-5516134	WW domain binding protein 2 [Source:HGNC Symbol;Acc:HGNC:12738]	GO:0000790(nuclear chromatin);GO:0071442(positive regulation of histone H3-K14 acetylation);GO:0071391(cellular response to estrogen stimulus);GO:0045944(positive regulation of transcription from RNA polymerase II promoter);GO:0045815(positive regulation of gene expression, epigenetic);GO:0045184(establishment of protein localization);GO:0031490(chromatin DNA binding);GO:0001105(RNA polymerase II…	NA	ssc-miR-128	8mer	-0.18315	69	140	-19.16
ciRNA170	chr12	5514638	5516107	+	1	ciRNA	-	ENSSSCT00000030348	WBP2	mRNA	chr12:5514637-5516134	WW domain binding protein 2 [Source:HGNC Symbol;Acc:HGNC:12738]	GO:0000790(nuclear chromatin);GO:0071442(positive regulation of histone H3-K14 acetylation);GO:0071391(cellular response to estrogen stimulus);GO:0045944(positive regulation of transcription from RNA polymerase II promoter);GO:0045815(positive regulation of gene expression, epigenetic);GO:0045184(establishment of protein localization);GO:0031490(chromatin DNA binding);GO:0001105(RNA polymerase II…	NA	ssc-miR-129a-5p	8mer	-0.2352	79	140	-10.53
ciRNA170	chr12	5514638	5516107	+	1	ciRNA	-	ENSSSCT00000030348	WBP2	mRNA	chr12:5514637-5516134	WW domain binding protein 2 [Source:HGNC Symbol;Acc:HGNC:12738]	GO:0000790(nuclear chromatin);GO:0071442(positive regulation of histone H3-K14 acetylation);GO:0071391(cellular response to estrogen stimulus);GO:0045944(positive regulation of transcription from RNA polymerase II promoter);GO:0045815(positive regulation of gene expression, epigenetic);GO:0045184(establishment of protein localization);GO:0031490(chromatin DNA binding);GO:0001105(RNA polymerase II…	NA	ssc-miR-129b	8mer	-0.2352	79	140	-10.53
ciRNA170	chr12	5514638	5516107	+	1	ciRNA	-	ENSSSCT00000030348	WBP2	mRNA	chr12:5514637-5516134	WW domain binding protein 2 [Source:HGNC Symbol;Acc:HGNC:12738]	GO:0000790(nuclear chromatin);GO:0071442(positive regulation of histone H3-K14 acetylation);GO:0071391(cellular response to estrogen stimulus);GO:0045944(positive regulation of transcription from RNA polymerase II promoter);GO:0045815(positive regulation of gene expression, epigenetic);GO:0045184(establishment of protein localization);GO:0031490(chromatin DNA binding);GO:0001105(RNA polymerase II…	NA	ssc-miR-1343	8mer	-0.2661	89	153	-26.36
ciRNA170	chr12	5514638	5516107	+	1	ciRNA	-	ENSSSCT00000030348	WBP2	mRNA	chr12:5514637-5516134	WW domain binding protein 2 [Source:HGNC Symbol;Acc:HGNC:12738]	GO:0000790(nuclear chromatin);GO:0071442(positive regulation of histone H3-K14 acetylation);GO:0071391(cellular response to estrogen stimulus);GO:0045944(positive regulation of transcription from RNA polymerase II promoter);GO:0045815(positive regulation of gene expression, epigenetic);GO:0045184(establishment of protein localization);GO:0031490(chromatin DNA binding);GO:0001105(RNA polymerase II…	NA	ssc-miR-17-3p	8mer	-0.22135	82	154	-18.57
ciRNA170	chr12	5514638	5516107	+	1	ciRNA	-	ENSSSCT00000030348	WBP2	mRNA	chr12:5514637-5516134	WW domain binding protein 2 [Source:HGNC Symbol;Acc:HGNC:12738]	GO:0000790(nuclear chromatin);GO:0071442(positive regulation of histone H3-K14 acetylation);GO:0071391(cellular response to estrogen stimulus);GO:0045944(positive regulation of transcription from RNA polymerase II promoter);GO:0045815(positive regulation of gene expression, epigenetic);GO:0045184(establishment of protein localization);GO:0031490(chromatin DNA binding);GO:0001105(RNA polymerase II…	NA	ssc-miR-193a-3p	m8	-0.1665	62	140	-15.77
ciRNA170	chr12	5514638	5516107	+	1	ciRNA	-	ENSSSCT00000030348	WBP2	mRNA	chr12:5514637-5516134	WW domain binding protein 2 [Source:HGNC Symbol;Acc:HGNC:12738]	GO:0000790(nuclear chromatin);GO:0071442(positive regulation of histone H3-K14 acetylation);GO:0071391(cellular response to estrogen stimulus);GO:0045944(positive regulation of transcription from RNA polymerase II promoter);GO:0045815(positive regulation of gene expression, epigenetic);GO:0045184(establishment of protein localization);GO:0031490(chromatin DNA binding);GO:0001105(RNA polymerase II…	NA	ssc-miR-30c-1-3p	m8	-0.1245	53	166	-22.12
ciRNA170	chr12	5514638	5516107	+	1	ciRNA	-	ENSSSCT00000030348	WBP2	mRNA	chr12:5514637-5516134	WW domain binding protein 2 [Source:HGNC Symbol;Acc:HGNC:12738]	GO:0000790(nuclear chromatin);GO:0071442(positive regulation of histone H3-K14 acetylation);GO:0071391(cellular response to estrogen stimulus);GO:0045944(positive regulation of transcription from RNA polymerase II promoter);GO:0045815(positive regulation of gene expression, epigenetic);GO:0045184(establishment of protein localization);GO:0031490(chromatin DNA binding);GO:0001105(RNA polymerase II…	NA	ssc-miR-30c-3p	m8	-0.127	50	162	-19.58
ciRNA170	chr12	5514638	5516107	+	1	ciRNA	-	ENSSSCT00000030348	WBP2	mRNA	chr12:5514637-5516134	WW domain binding protein 2 [Source:HGNC Symbol;Acc:HGNC:12738]	GO:0000790(nuclear chromatin);GO:0071442(positive regulation of histone H3-K14 acetylation);GO:0071391(cellular response to estrogen stimulus);GO:0045944(positive regulation of transcription from RNA polymerase II promoter);GO:0045815(positive regulation of gene expression, epigenetic);GO:0045184(establishment of protein localization);GO:0031490(chromatin DNA binding);GO:0001105(RNA polymerase II…	NA	ssc-miR-383	8mer	-0.2724	87	158	-22.65
ciRNA170	chr12	5514638	5516107	+	1	ciRNA	-	ENSSSCT00000030348	WBP2	mRNA	chr12:5514637-5516134	WW domain binding protein 2 [Source:HGNC Symbol;Acc:HGNC:12738]	GO:0000790(nuclear chromatin);GO:0071442(positive regulation of histone H3-K14 acetylation);GO:0071391(cellular response to estrogen stimulus);GO:0045944(positive regulation of transcription from RNA polymerase II promoter);GO:0045815(positive regulation of gene expression, epigenetic);GO:0045184(establishment of protein localization);GO:0031490(chromatin DNA binding);GO:0001105(RNA polymerase II…	NA	ssc-miR-4335	8mer	-0.39125	97	156	-28.82
ciRNA170	chr12	5514638	5516107	+	1	ciRNA	-	ENSSSCT00000030348	WBP2	mRNA	chr12:5514637-5516134	WW domain binding protein 2 [Source:HGNC Symbol;Acc:HGNC:12738]	GO:0000790(nuclear chromatin);GO:0071442(positive regulation of histone H3-K14 acetylation);GO:0071391(cellular response to estrogen stimulus);GO:0045944(positive regulation of transcription from RNA polymerase II promoter);GO:0045815(positive regulation of gene expression, epigenetic);GO:0045184(establishment of protein localization);GO:0031490(chromatin DNA binding);GO:0001105(RNA polymerase II…	NA	ssc-miR-4339	8mer	-0.2813	88	156	-23.46
ciRNA170	chr12	5514638	5516107	+	1	ciRNA	-	ENSSSCT00000030348	WBP2	mRNA	chr12:5514637-5516134	WW domain binding protein 2 [Source:HGNC Symbol;Acc:HGNC:12738]	GO:0000790(nuclear chromatin);GO:0071442(positive regulation of histone H3-K14 acetylation);GO:0071391(cellular response to estrogen stimulus);GO:0045944(positive regulation of transcription from RNA polymerase II promoter);GO:0045815(positive regulation of gene expression, epigenetic);GO:0045184(establishment of protein localization);GO:0031490(chromatin DNA binding);GO:0001105(RNA polymerase II…	NA	ssc-miR-484	8mer	-0.2002	86	157	-23.92
ciRNA170	chr12	5514638	5516107	+	1	ciRNA	-	ENSSSCT00000030348	WBP2	mRNA	chr12:5514637-5516134	WW domain binding protein 2 [Source:HGNC Symbol;Acc:HGNC:12738]	GO:0000790(nuclear chromatin);GO:0071442(positive regulation of histone H3-K14 acetylation);GO:0071391(cellular response to estrogen stimulus);GO:0045944(positive regulation of transcription from RNA polymerase II promoter);GO:0045815(positive regulation of gene expression, epigenetic);GO:0045184(establishment of protein localization);GO:0031490(chromatin DNA binding);GO:0001105(RNA polymerase II…	NA	ssc-miR-490-5p	8mer	-0.2933	90	160	-24.39
ciRNA170	chr12	5514638	5516107	+	1	ciRNA	-	ENSSSCT00000030348	WBP2	mRNA	chr12:5514637-5516134	WW domain binding protein 2 [Source:HGNC Symbol;Acc:HGNC:12738]	GO:0000790(nuclear chromatin);GO:0071442(positive regulation of histone H3-K14 acetylation);GO:0071391(cellular response to estrogen stimulus);GO:0045944(positive regulation of transcription from RNA polymerase II promoter);GO:0045815(positive regulation of gene expression, epigenetic);GO:0045184(establishment of protein localization);GO:0031490(chromatin DNA binding);GO:0001105(RNA polymerase II…	NA	ssc-miR-542-3p	8mer	-0.3312	90	146	-19.05
ciRNA170	chr12	5514638	5516107	+	1	ciRNA	-	ENSSSCT00000030348	WBP2	mRNA	chr12:5514637-5516134	WW domain binding protein 2 [Source:HGNC Symbol;Acc:HGNC:12738]	GO:0000790(nuclear chromatin);GO:0071442(positive regulation of histone H3-K14 acetylation);GO:0071391(cellular response to estrogen stimulus);GO:0045944(positive regulation of transcription from RNA polymerase II promoter);GO:0045815(positive regulation of gene expression, epigenetic);GO:0045184(establishment of protein localization);GO:0031490(chromatin DNA binding);GO:0001105(RNA polymerase II…	NA	ssc-miR-7135-5p	8mer	-0.27925	88	143	-23.22
ciRNA170	chr12	5514638	5516107	+	1	ciRNA	-	ENSSSCT00000030348	WBP2	mRNA	chr12:5514637-5516134	WW domain binding protein 2 [Source:HGNC Symbol;Acc:HGNC:12738]	GO:0000790(nuclear chromatin);GO:0071442(positive regulation of histone H3-K14 acetylation);GO:0071391(cellular response to estrogen stimulus);GO:0045944(positive regulation of transcription from RNA polymerase II promoter);GO:0045815(positive regulation of gene expression, epigenetic);GO:0045184(establishment of protein localization);GO:0031490(chromatin DNA binding);GO:0001105(RNA polymerase II…	NA	ssc-miR-885-3p	m8	-0.1285	70	144	-18.53
ciRNA170	chr12	5514638	5516107	+	1	ciRNA	-	ENSSSCT00000030348	WBP2	mRNA	chr12:5514637-5516134	WW domain binding protein 2 [Source:HGNC Symbol;Acc:HGNC:12738]	GO:0000790(nuclear chromatin);GO:0071442(positive regulation of histone H3-K14 acetylation);GO:0071391(cellular response to estrogen stimulus);GO:0045944(positive regulation of transcription from RNA polymerase II promoter);GO:0045815(positive regulation of gene expression, epigenetic);GO:0045184(establishment of protein localization);GO:0031490(chromatin DNA binding);GO:0001105(RNA polymerase II…	NA	ssc-miR-9830-5p	m8	-0.1785	65	148	-17.63
ciRNA170	chr12	5514638	5516107	+	1	ciRNA	-	ENSSSCT00000030348	WBP2	mRNA	chr12:5514637-5516134	WW domain binding protein 2 [Source:HGNC Symbol;Acc:HGNC:12738]	GO:0000790(nuclear chromatin);GO:0071442(positive regulation of histone H3-K14 acetylation);GO:0071391(cellular response to estrogen stimulus);GO:0045944(positive regulation of transcription from RNA polymerase II promoter);GO:0045815(positive regulation of gene expression, epigenetic);GO:0045184(establishment of protein localization);GO:0031490(chromatin DNA binding);GO:0001105(RNA polymerase II…	NA	ssc-miR-9832-3p	8mer	-0.27525	83	158	-17.45
ciRNA171	chr12	55842947	55843124	-	1	ciRNA	-	ENSSSCT00000019569	PER1	mRNA	chr12:55842922-55843124	period circadian clock 1 [Source:HGNC Symbol;Acc:HGNC:8845]	GO:0005829(cytosol);GO:0005737(cytoplasm);GO:0005654(nucleoplasm);GO:0005634(nucleus);GO:2000323(negative regulation of glucocorticoid receptor signaling pathway);GO:0097167(circadian regulation of translation);GO:0070932(histone H3 deacetylation);GO:0051591(response to cAMP);GO:0045944(positive regulation of transcription from RNA polymerase II promoter);GO:0045892(negative regulation of transcr…	04710(Circadian rhythm);04713(Circadian entrainment);05168(Herpes simplex infection)	ssc-miR-885-3p	m8	-0.137	72	144	-18.28
ciRNA172	chr11	7646780	7646983	-	1	ciRNA	-	ENSSSCT00000010229	HSPH1	mRNA	chr11:7646751-7646983	heat shock protein 105 kDa [Source:RefSeq peptide;Acc:NP_001090973]	GO:0070062(extracellular exosome);GO:0005874(microtubule);GO:0005829(cytosol);GO:0005737(cytoplasm);GO:0005654(nucleoplasm);GO:0005634(nucleus);GO:2001234(negative regulation of apoptotic signaling pathway);GO:1903753(negative regulation of p38MAPK cascade);GO:1903751(negative regulation of intrinsic apoptotic signaling pathway in response to hydrogen peroxide);GO:1903748(negative regulation of e…	04141(Protein processing in endoplasmic reticulum)	ssc-miR-144	8mer	-0.44015	97	143	-11.62
ciRNA172	chr11	7646780	7646983	-	1	ciRNA	-	ENSSSCT00000010229	HSPH1	mRNA	chr11:7646751-7646983	heat shock protein 105 kDa [Source:RefSeq peptide;Acc:NP_001090973]	GO:0070062(extracellular exosome);GO:0005874(microtubule);GO:0005829(cytosol);GO:0005737(cytoplasm);GO:0005654(nucleoplasm);GO:0005634(nucleus);GO:2001234(negative regulation of apoptotic signaling pathway);GO:1903753(negative regulation of p38MAPK cascade);GO:1903751(negative regulation of intrinsic apoptotic signaling pathway in response to hydrogen peroxide);GO:1903748(negative regulation of e…	04141(Protein processing in endoplasmic reticulum)	ssc-miR-376b	8mer	-0.4212	95	145	-11.64
ciRNA172	chr11	7646780	7646983	-	1	ciRNA	-	ENSSSCT00000010229	HSPH1	mRNA	chr11:7646751-7646983	heat shock protein 105 kDa [Source:RefSeq peptide;Acc:NP_001090973]	GO:0070062(extracellular exosome);GO:0005874(microtubule);GO:0005829(cytosol);GO:0005737(cytoplasm);GO:0005654(nucleoplasm);GO:0005634(nucleus);GO:2001234(negative regulation of apoptotic signaling pathway);GO:1903753(negative regulation of p38MAPK cascade);GO:1903751(negative regulation of intrinsic apoptotic signaling pathway in response to hydrogen peroxide);GO:1903748(negative regulation of e…	04141(Protein processing in endoplasmic reticulum)	ssc-miR-383	m8	-0.1475	58	144	-13.25
ciRNA173	chr14	6719476	6720305	+	1	ciRNA	-	ENSSSCT00000010534	XPO7	mRNA	chr14:6719475-6720332	exportin 7 [Source:HGNC Symbol;Acc:HGNC:14108]	GO:0005737(cytoplasm);GO:0005643(nuclear pore);GO:0005634(nucleus);GO:0006886(intracellular protein transport);GO:0006611(protein export from nucleus);GO:0008536(Ran GTPase binding);GO:0005049(nuclear export signal receptor activity);GO:0005622(intracellular)	NA	ssc-miR-1296-3p	m8	-0.143	62	145	-18.36
ciRNA173	chr14	6719476	6720305	+	1	ciRNA	-	ENSSSCT00000010534	XPO7	mRNA	chr14:6719475-6720332	exportin 7 [Source:HGNC Symbol;Acc:HGNC:14108]	GO:0005737(cytoplasm);GO:0005643(nuclear pore);GO:0005634(nucleus);GO:0006886(intracellular protein transport);GO:0006611(protein export from nucleus);GO:0008536(Ran GTPase binding);GO:0005049(nuclear export signal receptor activity);GO:0005622(intracellular)	NA	ssc-miR-135	8mer	-0.4174	98	165	-17
ciRNA173	chr14	6719476	6720305	+	1	ciRNA	-	ENSSSCT00000010534	XPO7	mRNA	chr14:6719475-6720332	exportin 7 [Source:HGNC Symbol;Acc:HGNC:14108]	GO:0005737(cytoplasm);GO:0005643(nuclear pore);GO:0005634(nucleus);GO:0006886(intracellular protein transport);GO:0006611(protein export from nucleus);GO:0008536(Ran GTPase binding);GO:0005049(nuclear export signal receptor activity);GO:0005622(intracellular)	NA	ssc-miR-136	8mer	-0.54015	99	146	-12.8
ciRNA173	chr14	6719476	6720305	+	1	ciRNA	-	ENSSSCT00000010534	XPO7	mRNA	chr14:6719475-6720332	exportin 7 [Source:HGNC Symbol;Acc:HGNC:14108]	GO:0005737(cytoplasm);GO:0005643(nuclear pore);GO:0005634(nucleus);GO:0006886(intracellular protein transport);GO:0006611(protein export from nucleus);GO:0008536(Ran GTPase binding);GO:0005049(nuclear export signal receptor activity);GO:0005622(intracellular)	NA	ssc-miR-186	m8	-0.264	87	143	-13.73
ciRNA173	chr14	6719476	6720305	+	1	ciRNA	-	ENSSSCT00000010534	XPO7	mRNA	chr14:6719475-6720332	exportin 7 [Source:HGNC Symbol;Acc:HGNC:14108]	GO:0005737(cytoplasm);GO:0005643(nuclear pore);GO:0005634(nucleus);GO:0006886(intracellular protein transport);GO:0006611(protein export from nucleus);GO:0008536(Ran GTPase binding);GO:0005049(nuclear export signal receptor activity);GO:0005622(intracellular)	NA	ssc-miR-217	m8	-0.189	66	155	-16.64
ciRNA173	chr14	6719476	6720305	+	1	ciRNA	-	ENSSSCT00000010534	XPO7	mRNA	chr14:6719475-6720332	exportin 7 [Source:HGNC Symbol;Acc:HGNC:14108]	GO:0005737(cytoplasm);GO:0005643(nuclear pore);GO:0005634(nucleus);GO:0006886(intracellular protein transport);GO:0006611(protein export from nucleus);GO:0008536(Ran GTPase binding);GO:0005049(nuclear export signal receptor activity);GO:0005622(intracellular)	NA	ssc-miR-335	m8	-0.2305	79	148	-16.3
ciRNA173	chr14	6719476	6720305	+	1	ciRNA	-	ENSSSCT00000010534	XPO7	mRNA	chr14:6719475-6720332	exportin 7 [Source:HGNC Symbol;Acc:HGNC:14108]	GO:0005737(cytoplasm);GO:0005643(nuclear pore);GO:0005634(nucleus);GO:0006886(intracellular protein transport);GO:0006611(protein export from nucleus);GO:0008536(Ran GTPase binding);GO:0005049(nuclear export signal receptor activity);GO:0005622(intracellular)	NA	ssc-miR-4331	8mer	-0.34615	94	157	-19.09
ciRNA173	chr14	6719476	6720305	+	1	ciRNA	-	ENSSSCT00000010534	XPO7	mRNA	chr14:6719475-6720332	exportin 7 [Source:HGNC Symbol;Acc:HGNC:14108]	GO:0005737(cytoplasm);GO:0005643(nuclear pore);GO:0005634(nucleus);GO:0006886(intracellular protein transport);GO:0006611(protein export from nucleus);GO:0008536(Ran GTPase binding);GO:0005049(nuclear export signal receptor activity);GO:0005622(intracellular)	NA	ssc-miR-499-5p	m8	-0.2025	71	147	-13.04
ciRNA173	chr14	6719476	6720305	+	1	ciRNA	-	ENSSSCT00000010534	XPO7	mRNA	chr14:6719475-6720332	exportin 7 [Source:HGNC Symbol;Acc:HGNC:14108]	GO:0005737(cytoplasm);GO:0005643(nuclear pore);GO:0005634(nucleus);GO:0006886(intracellular protein transport);GO:0006611(protein export from nucleus);GO:0008536(Ran GTPase binding);GO:0005049(nuclear export signal receptor activity);GO:0005622(intracellular)	NA	ssc-miR-500	m8	-0.271	86	144	-13.6
ciRNA173	chr14	6719476	6720305	+	1	ciRNA	-	ENSSSCT00000010534	XPO7	mRNA	chr14:6719475-6720332	exportin 7 [Source:HGNC Symbol;Acc:HGNC:14108]	GO:0005737(cytoplasm);GO:0005643(nuclear pore);GO:0005634(nucleus);GO:0006886(intracellular protein transport);GO:0006611(protein export from nucleus);GO:0008536(Ran GTPase binding);GO:0005049(nuclear export signal receptor activity);GO:0005622(intracellular)	NA	ssc-miR-708-3p	m8	-0.228	75	146	-12.48
ciRNA173	chr14	6719476	6720305	+	1	ciRNA	-	ENSSSCT00000010534	XPO7	mRNA	chr14:6719475-6720332	exportin 7 [Source:HGNC Symbol;Acc:HGNC:14108]	GO:0005737(cytoplasm);GO:0005643(nuclear pore);GO:0005634(nucleus);GO:0006886(intracellular protein transport);GO:0006611(protein export from nucleus);GO:0008536(Ran GTPase binding);GO:0005049(nuclear export signal receptor activity);GO:0005622(intracellular)	NA	ssc-miR-7136-3p	m8	-0.2485	85	150	-15.35
ciRNA173	chr14	6719476	6720305	+	1	ciRNA	-	ENSSSCT00000010534	XPO7	mRNA	chr14:6719475-6720332	exportin 7 [Source:HGNC Symbol;Acc:HGNC:14108]	GO:0005737(cytoplasm);GO:0005643(nuclear pore);GO:0005634(nucleus);GO:0006886(intracellular protein transport);GO:0006611(protein export from nucleus);GO:0008536(Ran GTPase binding);GO:0005049(nuclear export signal receptor activity);GO:0005622(intracellular)	NA	ssc-miR-9785-5p	8mer	-0.4382	98	147	-16.87
ciRNA173	chr14	6719476	6720305	+	1	ciRNA	-	ENSSSCT00000010534	XPO7	mRNA	chr14:6719475-6720332	exportin 7 [Source:HGNC Symbol;Acc:HGNC:14108]	GO:0005737(cytoplasm);GO:0005643(nuclear pore);GO:0005634(nucleus);GO:0006886(intracellular protein transport);GO:0006611(protein export from nucleus);GO:0008536(Ran GTPase binding);GO:0005049(nuclear export signal receptor activity);GO:0005622(intracellular)	NA	ssc-miR-9789-3p	8mer	-0.3652	93	168	-17.12
ciRNA173	chr14	6719476	6720305	+	1	ciRNA	-	ENSSSCT00000010534	XPO7	mRNA	chr14:6719475-6720332	exportin 7 [Source:HGNC Symbol;Acc:HGNC:14108]	GO:0005737(cytoplasm);GO:0005643(nuclear pore);GO:0005634(nucleus);GO:0006886(intracellular protein transport);GO:0006611(protein export from nucleus);GO:0008536(Ran GTPase binding);GO:0005049(nuclear export signal receptor activity);GO:0005622(intracellular)	NA	ssc-miR-9801-5p	8mer	-0.5011	99	145	-11.51
ciRNA173	chr14	6719476	6720305	+	1	ciRNA	-	ENSSSCT00000010534	XPO7	mRNA	chr14:6719475-6720332	exportin 7 [Source:HGNC Symbol;Acc:HGNC:14108]	GO:0005737(cytoplasm);GO:0005643(nuclear pore);GO:0005634(nucleus);GO:0006886(intracellular protein transport);GO:0006611(protein export from nucleus);GO:0008536(Ran GTPase binding);GO:0005049(nuclear export signal receptor activity);GO:0005622(intracellular)	NA	ssc-miR-9809-3p	m8	-0.2155	73	154	-10.18
ciRNA173	chr14	6719476	6720305	+	1	ciRNA	-	ENSSSCT00000010534	XPO7	mRNA	chr14:6719475-6720332	exportin 7 [Source:HGNC Symbol;Acc:HGNC:14108]	GO:0005737(cytoplasm);GO:0005643(nuclear pore);GO:0005634(nucleus);GO:0006886(intracellular protein transport);GO:0006611(protein export from nucleus);GO:0008536(Ran GTPase binding);GO:0005049(nuclear export signal receptor activity);GO:0005622(intracellular)	NA	ssc-miR-9813-5p	8mer	-0.38105	97	145	-24.63
ciRNA173	chr14	6719476	6720305	+	1	ciRNA	-	ENSSSCT00000010534	XPO7	mRNA	chr14:6719475-6720332	exportin 7 [Source:HGNC Symbol;Acc:HGNC:14108]	GO:0005737(cytoplasm);GO:0005643(nuclear pore);GO:0005634(nucleus);GO:0006886(intracellular protein transport);GO:0006611(protein export from nucleus);GO:0008536(Ran GTPase binding);GO:0005049(nuclear export signal receptor activity);GO:0005622(intracellular)	NA	ssc-miR-9816-3p	m8	-0.187	75	142	-12.46
ciRNA173	chr14	6719476	6720305	+	1	ciRNA	-	ENSSSCT00000010534	XPO7	mRNA	chr14:6719475-6720332	exportin 7 [Source:HGNC Symbol;Acc:HGNC:14108]	GO:0005737(cytoplasm);GO:0005643(nuclear pore);GO:0005634(nucleus);GO:0006886(intracellular protein transport);GO:0006611(protein export from nucleus);GO:0008536(Ran GTPase binding);GO:0005049(nuclear export signal receptor activity);GO:0005622(intracellular)	NA	ssc-miR-9859-3p	1a	-0.14685	51	149	-12.58
ciRNA174	chr14	60202438	60202768	+	1	ciRNA	-	ENSSSCT00000011121	RBM34	mRNA	chr14:60202437-60206126	RNA binding motif protein 34 [Source:HGNC Symbol;Acc:HGNC:28965]	GO:0005730(nucleolus);GO:0005634(nucleus);GO:0003723(RNA binding);GO:0003676(nucleic acid binding);GO:0000166(nucleotide binding)	NA	ssc-miR-145-3p	1a	-0.23685	79	140	-20.11
ciRNA174	chr14	60202438	60202768	+	1	ciRNA	-	ENSSSCT00000011121	RBM34	mRNA	chr14:60202437-60206126	RNA binding motif protein 34 [Source:HGNC Symbol;Acc:HGNC:28965]	GO:0005730(nucleolus);GO:0005634(nucleus);GO:0003723(RNA binding);GO:0003676(nucleic acid binding);GO:0000166(nucleotide binding)	NA	ssc-miR-421-5p	m8	-0.357	89	172	-13.4
ciRNA174	chr14	60202438	60202768	+	1	ciRNA	-	ENSSSCT00000011121	RBM34	mRNA	chr14:60202437-60206126	RNA binding motif protein 34 [Source:HGNC Symbol;Acc:HGNC:28965]	GO:0005730(nucleolus);GO:0005634(nucleus);GO:0003723(RNA binding);GO:0003676(nucleic acid binding);GO:0000166(nucleotide binding)	NA	ssc-miR-9801-5p	m8	-0.218	74	171	-17.66
ciRNA174	chr14	60202438	60202768	+	1	ciRNA	-	ENSSSCT00000011121	RBM34	mRNA	chr14:60202437-60206126	RNA binding motif protein 34 [Source:HGNC Symbol;Acc:HGNC:28965]	GO:0005730(nucleolus);GO:0005634(nucleus);GO:0003723(RNA binding);GO:0003676(nucleic acid binding);GO:0000166(nucleotide binding)	NA	ssc-miR-9802-3p	m8	-0.245	87	147	-24.33
ciRNA174	chr14	60202438	60202768	+	1	ciRNA	-	ENSSSCT00000011121	RBM34	mRNA	chr14:60202437-60206126	RNA binding motif protein 34 [Source:HGNC Symbol;Acc:HGNC:28965]	GO:0005730(nucleolus);GO:0005634(nucleus);GO:0003723(RNA binding);GO:0003676(nucleic acid binding);GO:0000166(nucleotide binding)	NA	ssc-miR-9839-5p	m8	-0.249	86	160	-20.16
ciRNA175	chr14	80636716	80636995	-	1	ciRNA	-	ENSSSCT00000011253	PSAP	mRNA	chr14:80636688-80636995	prosaposin [Source:HGNC Symbol;Acc:HGNC:9498]	GO:0070062(extracellular exosome);GO:0043231(intracellular membrane-bounded organelle);GO:0005764(lysosome);GO:0005739(mitochondrion);GO:0005615(extracellular space);GO:1903206(negative regulation of hydrogen peroxide-induced cell death);GO:0071310(cellular response to organic substance);GO:0060742(epithelial cell differentiation involved in prostate gland development);GO:0060736(prostate gland g…	04142(Lysosome)	ssc-miR-335	m8	-0.189	69	144	-12.5
ciRNA175	chr14	80636716	80636995	-	1	ciRNA	-	ENSSSCT00000011253	PSAP	mRNA	chr14:80636688-80636995	prosaposin [Source:HGNC Symbol;Acc:HGNC:9498]	GO:0070062(extracellular exosome);GO:0043231(intracellular membrane-bounded organelle);GO:0005764(lysosome);GO:0005739(mitochondrion);GO:0005615(extracellular space);GO:1903206(negative regulation of hydrogen peroxide-induced cell death);GO:0071310(cellular response to organic substance);GO:0060742(epithelial cell differentiation involved in prostate gland development);GO:0060736(prostate gland g…	04142(Lysosome)	ssc-miR-361-3p	m8	-0.187	75	154	-25.26
ciRNA175	chr14	80636716	80636995	-	1	ciRNA	-	ENSSSCT00000011253	PSAP	mRNA	chr14:80636688-80636995	prosaposin [Source:HGNC Symbol;Acc:HGNC:9498]	GO:0070062(extracellular exosome);GO:0043231(intracellular membrane-bounded organelle);GO:0005764(lysosome);GO:0005739(mitochondrion);GO:0005615(extracellular space);GO:1903206(negative regulation of hydrogen peroxide-induced cell death);GO:0071310(cellular response to organic substance);GO:0060742(epithelial cell differentiation involved in prostate gland development);GO:0060736(prostate gland g…	04142(Lysosome)	ssc-miR-532-3p	m8	-0.2575	86	147	-18.52
ciRNA175	chr14	80636716	80636995	-	1	ciRNA	-	ENSSSCT00000011253	PSAP	mRNA	chr14:80636688-80636995	prosaposin [Source:HGNC Symbol;Acc:HGNC:9498]	GO:0070062(extracellular exosome);GO:0043231(intracellular membrane-bounded organelle);GO:0005764(lysosome);GO:0005739(mitochondrion);GO:0005615(extracellular space);GO:1903206(negative regulation of hydrogen peroxide-induced cell death);GO:0071310(cellular response to organic substance);GO:0060742(epithelial cell differentiation involved in prostate gland development);GO:0060736(prostate gland g…	04142(Lysosome)	ssc-miR-9856-3p	m8	-0.179	72	151	-21.1
ciRNA176	chrX	50891350	50891578	+	1	ciRNA	-	ENSSSCT00000013470	MAGED4B	mRNA	chrX:50891349-50891761	NA	NA	NA	ssc-miR-361-3p	8mer	-0.2102	80	143	-20.15
ciRNA176	chrX	50891350	50891578	+	1	ciRNA	-	ENSSSCT00000013470	MAGED4B	mRNA	chrX:50891349-50891761	NA	NA	NA	ssc-miR-671-3p	m8	-0.152	58	154	-20.77
ciRNA176	chrX	50891350	50891578	+	1	ciRNA	-	ENSSSCT00000013470	MAGED4B	mRNA	chrX:50891349-50891761	NA	NA	NA	ssc-miR-7141-5p	m8	-0.167	54	140	-10.13
ciRNA177	chr7	25235699	25236366	+	1	ciRNA	-	ENSSSCT00000034718	GABBR1	mRNA	chr7:25235698-25236384	gamma-aminobutyric acid type B receptor subunit 1 [Source:HGNC Symbol;Acc:HGNC:4070]	GO:0098793(presynapse);GO:0045211(postsynaptic membrane);GO:0042734(presynaptic membrane);GO:0038039(G-protein coupled receptor heterodimeric complex);GO:0038037(G-protein coupled receptor dimeric complex);GO:0016021(integral component of membrane);GO:0016020(membrane);GO:0005887(integral component of plasma membrane);GO:0005737(cytoplasm);GO:0007214(gamma-aminobutyric acid signaling pathway);GO:…	04024(cAMP signaling pathway);04080(Neuroactive ligand-receptor interaction);04915(Estrogen signaling pathway);04727(GABAergic synapse);05032(Morphine addiction)	ssc-miR-1306-5p	m8	-0.151	54	148	-27.63
ciRNA177	chr7	25235699	25236366	+	1	ciRNA	-	ENSSSCT00000034718	GABBR1	mRNA	chr7:25235698-25236384	gamma-aminobutyric acid type B receptor subunit 1 [Source:HGNC Symbol;Acc:HGNC:4070]	GO:0098793(presynapse);GO:0045211(postsynaptic membrane);GO:0042734(presynaptic membrane);GO:0038039(G-protein coupled receptor heterodimeric complex);GO:0038037(G-protein coupled receptor dimeric complex);GO:0016021(integral component of membrane);GO:0016020(membrane);GO:0005887(integral component of plasma membrane);GO:0005737(cytoplasm);GO:0007214(gamma-aminobutyric acid signaling pathway);GO:…	04024(cAMP signaling pathway);04080(Neuroactive ligand-receptor interaction);04915(Estrogen signaling pathway);04727(GABAergic synapse);05032(Morphine addiction)	ssc-miR-133a-3p	m8	-0.1985	78	156	-26.97
ciRNA177	chr7	25235699	25236366	+	1	ciRNA	-	ENSSSCT00000034718	GABBR1	mRNA	chr7:25235698-25236384	gamma-aminobutyric acid type B receptor subunit 1 [Source:HGNC Symbol;Acc:HGNC:4070]	GO:0098793(presynapse);GO:0045211(postsynaptic membrane);GO:0042734(presynaptic membrane);GO:0038039(G-protein coupled receptor heterodimeric complex);GO:0038037(G-protein coupled receptor dimeric complex);GO:0016021(integral component of membrane);GO:0016020(membrane);GO:0005887(integral component of plasma membrane);GO:0005737(cytoplasm);GO:0007214(gamma-aminobutyric acid signaling pathway);GO:…	04024(cAMP signaling pathway);04080(Neuroactive ligand-receptor interaction);04915(Estrogen signaling pathway);04727(GABAergic synapse);05032(Morphine addiction)	ssc-miR-139-3p	8mer	-0.2851	89	147	-21.65
ciRNA177	chr7	25235699	25236366	+	1	ciRNA	-	ENSSSCT00000034718	GABBR1	mRNA	chr7:25235698-25236384	gamma-aminobutyric acid type B receptor subunit 1 [Source:HGNC Symbol;Acc:HGNC:4070]	GO:0098793(presynapse);GO:0045211(postsynaptic membrane);GO:0042734(presynaptic membrane);GO:0038039(G-protein coupled receptor heterodimeric complex);GO:0038037(G-protein coupled receptor dimeric complex);GO:0016021(integral component of membrane);GO:0016020(membrane);GO:0005887(integral component of plasma membrane);GO:0005737(cytoplasm);GO:0007214(gamma-aminobutyric acid signaling pathway);GO:…	04024(cAMP signaling pathway);04080(Neuroactive ligand-receptor interaction);04915(Estrogen signaling pathway);04727(GABAergic synapse);05032(Morphine addiction)	ssc-miR-143-5p	m8	-0.177	75	146	-14.9
ciRNA177	chr7	25235699	25236366	+	1	ciRNA	-	ENSSSCT00000034718	GABBR1	mRNA	chr7:25235698-25236384	gamma-aminobutyric acid type B receptor subunit 1 [Source:HGNC Symbol;Acc:HGNC:4070]	GO:0098793(presynapse);GO:0045211(postsynaptic membrane);GO:0042734(presynaptic membrane);GO:0038039(G-protein coupled receptor heterodimeric complex);GO:0038037(G-protein coupled receptor dimeric complex);GO:0016021(integral component of membrane);GO:0016020(membrane);GO:0005887(integral component of plasma membrane);GO:0005737(cytoplasm);GO:0007214(gamma-aminobutyric acid signaling pathway);GO:…	04024(cAMP signaling pathway);04080(Neuroactive ligand-receptor interaction);04915(Estrogen signaling pathway);04727(GABAergic synapse);05032(Morphine addiction)	ssc-miR-1839-3p	m8	-0.192	78	166	-23.34
ciRNA177	chr7	25235699	25236366	+	1	ciRNA	-	ENSSSCT00000034718	GABBR1	mRNA	chr7:25235698-25236384	gamma-aminobutyric acid type B receptor subunit 1 [Source:HGNC Symbol;Acc:HGNC:4070]	GO:0098793(presynapse);GO:0045211(postsynaptic membrane);GO:0042734(presynaptic membrane);GO:0038039(G-protein coupled receptor heterodimeric complex);GO:0038037(G-protein coupled receptor dimeric complex);GO:0016021(integral component of membrane);GO:0016020(membrane);GO:0005887(integral component of plasma membrane);GO:0005737(cytoplasm);GO:0007214(gamma-aminobutyric acid signaling pathway);GO:…	04024(cAMP signaling pathway);04080(Neuroactive ligand-receptor interaction);04915(Estrogen signaling pathway);04727(GABAergic synapse);05032(Morphine addiction)	ssc-miR-193a-5p	8mer	-0.2752	86	153	-26.24
ciRNA177	chr7	25235699	25236366	+	1	ciRNA	-	ENSSSCT00000034718	GABBR1	mRNA	chr7:25235698-25236384	gamma-aminobutyric acid type B receptor subunit 1 [Source:HGNC Symbol;Acc:HGNC:4070]	GO:0098793(presynapse);GO:0045211(postsynaptic membrane);GO:0042734(presynaptic membrane);GO:0038039(G-protein coupled receptor heterodimeric complex);GO:0038037(G-protein coupled receptor dimeric complex);GO:0016021(integral component of membrane);GO:0016020(membrane);GO:0005887(integral component of plasma membrane);GO:0005737(cytoplasm);GO:0007214(gamma-aminobutyric acid signaling pathway);GO:…	04024(cAMP signaling pathway);04080(Neuroactive ligand-receptor interaction);04915(Estrogen signaling pathway);04727(GABAergic synapse);05032(Morphine addiction)	ssc-miR-383	8mer	-0.3782	95	145	-17.49
ciRNA177	chr7	25235699	25236366	+	1	ciRNA	-	ENSSSCT00000034718	GABBR1	mRNA	chr7:25235698-25236384	gamma-aminobutyric acid type B receptor subunit 1 [Source:HGNC Symbol;Acc:HGNC:4070]	GO:0098793(presynapse);GO:0045211(postsynaptic membrane);GO:0042734(presynaptic membrane);GO:0038039(G-protein coupled receptor heterodimeric complex);GO:0038037(G-protein coupled receptor dimeric complex);GO:0016021(integral component of membrane);GO:0016020(membrane);GO:0005887(integral component of plasma membrane);GO:0005737(cytoplasm);GO:0007214(gamma-aminobutyric acid signaling pathway);GO:…	04024(cAMP signaling pathway);04080(Neuroactive ligand-receptor interaction);04915(Estrogen signaling pathway);04727(GABAergic synapse);05032(Morphine addiction)	ssc-miR-744	m8	-0.166	83	151	-27.33
ciRNA178	chr7	34501973	34502319	+	1	ciRNA	-	ENSSSCT00000001691	ITPR3	mRNA	chr7:34501972-34502345	inositol 1,4,5-trisphosphate receptor type 3 [Source:HGNC Symbol;Acc:HGNC:6182]	GO:0043235(receptor complex);GO:0016021(integral component of membrane);GO:0016020(membrane);GO:0005887(integral component of plasma membrane);GO:0005886(plasma membrane);GO:0005789(endoplasmic reticulum membrane);GO:0005783(endoplasmic reticulum);GO:0005737(cytoplasm);GO:0005730(nucleolus);GO:0005654(nucleoplasm);GO:0005634(nucleus);GO:0070588(calcium ion transmembrane transport);GO:0060402(calc…	04020(Calcium signaling pathway);04070(Phosphatidylinositol signaling system);04022(cGMP - PKG signaling pathway);04114(Oocyte meiosis);04540(Gap junction);04611(Platelet activation);04911(Insulin secretion);04922(Glucagon signaling pathway);04912(GnRH signaling pathway);04915(Estrogen signaling pathway);04921(Oxytocin signaling pathway);04918(Thyroid hormone synthesis);04270(Vascular smooth musc…	ssc-miR-133a-3p	m8	-0.1505	63	146	-19.56
ciRNA178	chr7	34501973	34502319	+	1	ciRNA	-	ENSSSCT00000001691	ITPR3	mRNA	chr7:34501972-34502345	inositol 1,4,5-trisphosphate receptor type 3 [Source:HGNC Symbol;Acc:HGNC:6182]	GO:0043235(receptor complex);GO:0016021(integral component of membrane);GO:0016020(membrane);GO:0005887(integral component of plasma membrane);GO:0005886(plasma membrane);GO:0005789(endoplasmic reticulum membrane);GO:0005783(endoplasmic reticulum);GO:0005737(cytoplasm);GO:0005730(nucleolus);GO:0005654(nucleoplasm);GO:0005634(nucleus);GO:0070588(calcium ion transmembrane transport);GO:0060402(calc…	04020(Calcium signaling pathway);04070(Phosphatidylinositol signaling system);04022(cGMP - PKG signaling pathway);04114(Oocyte meiosis);04540(Gap junction);04611(Platelet activation);04911(Insulin secretion);04922(Glucagon signaling pathway);04912(GnRH signaling pathway);04915(Estrogen signaling pathway);04921(Oxytocin signaling pathway);04918(Thyroid hormone synthesis);04270(Vascular smooth musc…	ssc-miR-361-3p	8mer	-0.3682	96	161	-29.74
ciRNA178	chr7	34501973	34502319	+	1	ciRNA	-	ENSSSCT00000001691	ITPR3	mRNA	chr7:34501972-34502345	inositol 1,4,5-trisphosphate receptor type 3 [Source:HGNC Symbol;Acc:HGNC:6182]	GO:0043235(receptor complex);GO:0016021(integral component of membrane);GO:0016020(membrane);GO:0005887(integral component of plasma membrane);GO:0005886(plasma membrane);GO:0005789(endoplasmic reticulum membrane);GO:0005783(endoplasmic reticulum);GO:0005737(cytoplasm);GO:0005730(nucleolus);GO:0005654(nucleoplasm);GO:0005634(nucleus);GO:0070588(calcium ion transmembrane transport);GO:0060402(calc…	04020(Calcium signaling pathway);04070(Phosphatidylinositol signaling system);04022(cGMP - PKG signaling pathway);04114(Oocyte meiosis);04540(Gap junction);04611(Platelet activation);04911(Insulin secretion);04922(Glucagon signaling pathway);04912(GnRH signaling pathway);04915(Estrogen signaling pathway);04921(Oxytocin signaling pathway);04918(Thyroid hormone synthesis);04270(Vascular smooth musc…	ssc-miR-370	m8	-0.165	66	146	-26.24
ciRNA178	chr7	34501973	34502319	+	1	ciRNA	-	ENSSSCT00000001691	ITPR3	mRNA	chr7:34501972-34502345	inositol 1,4,5-trisphosphate receptor type 3 [Source:HGNC Symbol;Acc:HGNC:6182]	GO:0043235(receptor complex);GO:0016021(integral component of membrane);GO:0016020(membrane);GO:0005887(integral component of plasma membrane);GO:0005886(plasma membrane);GO:0005789(endoplasmic reticulum membrane);GO:0005783(endoplasmic reticulum);GO:0005737(cytoplasm);GO:0005730(nucleolus);GO:0005654(nucleoplasm);GO:0005634(nucleus);GO:0070588(calcium ion transmembrane transport);GO:0060402(calc…	04020(Calcium signaling pathway);04070(Phosphatidylinositol signaling system);04022(cGMP - PKG signaling pathway);04114(Oocyte meiosis);04540(Gap junction);04611(Platelet activation);04911(Insulin secretion);04922(Glucagon signaling pathway);04912(GnRH signaling pathway);04915(Estrogen signaling pathway);04921(Oxytocin signaling pathway);04918(Thyroid hormone synthesis);04270(Vascular smooth musc…	ssc-miR-378	m8	-0.15	50	142	-16.81
ciRNA178	chr7	34501973	34502319	+	1	ciRNA	-	ENSSSCT00000001691	ITPR3	mRNA	chr7:34501972-34502345	inositol 1,4,5-trisphosphate receptor type 3 [Source:HGNC Symbol;Acc:HGNC:6182]	GO:0043235(receptor complex);GO:0016021(integral component of membrane);GO:0016020(membrane);GO:0005887(integral component of plasma membrane);GO:0005886(plasma membrane);GO:0005789(endoplasmic reticulum membrane);GO:0005783(endoplasmic reticulum);GO:0005737(cytoplasm);GO:0005730(nucleolus);GO:0005654(nucleoplasm);GO:0005634(nucleus);GO:0070588(calcium ion transmembrane transport);GO:0060402(calc…	04020(Calcium signaling pathway);04070(Phosphatidylinositol signaling system);04022(cGMP - PKG signaling pathway);04114(Oocyte meiosis);04540(Gap junction);04611(Platelet activation);04911(Insulin secretion);04922(Glucagon signaling pathway);04912(GnRH signaling pathway);04915(Estrogen signaling pathway);04921(Oxytocin signaling pathway);04918(Thyroid hormone synthesis);04270(Vascular smooth musc…	ssc-miR-378b-3p	m8	-0.15	50	142	-16.81
ciRNA178	chr7	34501973	34502319	+	1	ciRNA	-	ENSSSCT00000001691	ITPR3	mRNA	chr7:34501972-34502345	inositol 1,4,5-trisphosphate receptor type 3 [Source:HGNC Symbol;Acc:HGNC:6182]	GO:0043235(receptor complex);GO:0016021(integral component of membrane);GO:0016020(membrane);GO:0005887(integral component of plasma membrane);GO:0005886(plasma membrane);GO:0005789(endoplasmic reticulum membrane);GO:0005783(endoplasmic reticulum);GO:0005737(cytoplasm);GO:0005730(nucleolus);GO:0005654(nucleoplasm);GO:0005634(nucleus);GO:0070588(calcium ion transmembrane transport);GO:0060402(calc…	04020(Calcium signaling pathway);04070(Phosphatidylinositol signaling system);04022(cGMP - PKG signaling pathway);04114(Oocyte meiosis);04540(Gap junction);04611(Platelet activation);04911(Insulin secretion);04922(Glucagon signaling pathway);04912(GnRH signaling pathway);04915(Estrogen signaling pathway);04921(Oxytocin signaling pathway);04918(Thyroid hormone synthesis);04270(Vascular smooth musc…	ssc-miR-504	m8	-0.1685	64	154	-21.78
ciRNA178	chr7	34501973	34502319	+	1	ciRNA	-	ENSSSCT00000001691	ITPR3	mRNA	chr7:34501972-34502345	inositol 1,4,5-trisphosphate receptor type 3 [Source:HGNC Symbol;Acc:HGNC:6182]	GO:0043235(receptor complex);GO:0016021(integral component of membrane);GO:0016020(membrane);GO:0005887(integral component of plasma membrane);GO:0005886(plasma membrane);GO:0005789(endoplasmic reticulum membrane);GO:0005783(endoplasmic reticulum);GO:0005737(cytoplasm);GO:0005730(nucleolus);GO:0005654(nucleoplasm);GO:0005634(nucleus);GO:0070588(calcium ion transmembrane transport);GO:0060402(calc…	04020(Calcium signaling pathway);04070(Phosphatidylinositol signaling system);04022(cGMP - PKG signaling pathway);04114(Oocyte meiosis);04540(Gap junction);04611(Platelet activation);04911(Insulin secretion);04922(Glucagon signaling pathway);04912(GnRH signaling pathway);04915(Estrogen signaling pathway);04921(Oxytocin signaling pathway);04918(Thyroid hormone synthesis);04270(Vascular smooth musc…	ssc-miR-7144-5p	m8	-0.222	81	159	-23.33
ciRNA179	chr7	43762209	43762489	+	1	ciRNA	-	ENSSSCT00000030706	CUL9	mRNA	chr7:43762208-43762515	cullin 9 [Source:HGNC Symbol;Acc:HGNC:15982]	GO:0031461(cullin-RING ubiquitin ligase complex);GO:0005829(cytosol);GO:0016567(protein ubiquitination);GO:0007088(regulation of mitotic nuclear division);GO:0006511(ubiquitin-dependent protein catabolic process);GO:0000226(microtubule cytoskeleton organization);GO:0046872(metal ion binding);GO:0031625(ubiquitin protein ligase binding);GO:0008270(zinc ion binding)	NA	ssc-miR-151-5p	m8	-0.148	62	150	-18.18
ciRNA179	chr7	43762209	43762489	+	1	ciRNA	-	ENSSSCT00000030706	CUL9	mRNA	chr7:43762208-43762515	cullin 9 [Source:HGNC Symbol;Acc:HGNC:15982]	GO:0031461(cullin-RING ubiquitin ligase complex);GO:0005829(cytosol);GO:0016567(protein ubiquitination);GO:0007088(regulation of mitotic nuclear division);GO:0006511(ubiquitin-dependent protein catabolic process);GO:0000226(microtubule cytoskeleton organization);GO:0046872(metal ion binding);GO:0031625(ubiquitin protein ligase binding);GO:0008270(zinc ion binding)	NA	ssc-miR-2366	8mer	-0.1991	79	140	-17.41
ciRNA179	chr7	43762209	43762489	+	1	ciRNA	-	ENSSSCT00000030706	CUL9	mRNA	chr7:43762208-43762515	cullin 9 [Source:HGNC Symbol;Acc:HGNC:15982]	GO:0031461(cullin-RING ubiquitin ligase complex);GO:0005829(cytosol);GO:0016567(protein ubiquitination);GO:0007088(regulation of mitotic nuclear division);GO:0006511(ubiquitin-dependent protein catabolic process);GO:0000226(microtubule cytoskeleton organization);GO:0046872(metal ion binding);GO:0031625(ubiquitin protein ligase binding);GO:0008270(zinc ion binding)	NA	ssc-miR-28-5p	m8	-0.136	59	142	-12.25
ciRNA179	chr7	43762209	43762489	+	1	ciRNA	-	ENSSSCT00000030706	CUL9	mRNA	chr7:43762208-43762515	cullin 9 [Source:HGNC Symbol;Acc:HGNC:15982]	GO:0031461(cullin-RING ubiquitin ligase complex);GO:0005829(cytosol);GO:0016567(protein ubiquitination);GO:0007088(regulation of mitotic nuclear division);GO:0006511(ubiquitin-dependent protein catabolic process);GO:0000226(microtubule cytoskeleton organization);GO:0046872(metal ion binding);GO:0031625(ubiquitin protein ligase binding);GO:0008270(zinc ion binding)	NA	ssc-miR-371-5p	m8	-0.2275	81	148	-17.75
ciRNA179	chr7	43762209	43762489	+	1	ciRNA	-	ENSSSCT00000030706	CUL9	mRNA	chr7:43762208-43762515	cullin 9 [Source:HGNC Symbol;Acc:HGNC:15982]	GO:0031461(cullin-RING ubiquitin ligase complex);GO:0005829(cytosol);GO:0016567(protein ubiquitination);GO:0007088(regulation of mitotic nuclear division);GO:0006511(ubiquitin-dependent protein catabolic process);GO:0000226(microtubule cytoskeleton organization);GO:0046872(metal ion binding);GO:0031625(ubiquitin protein ligase binding);GO:0008270(zinc ion binding)	NA	ssc-miR-423-5p	8mer	-0.2853	91	159	-27.19
ciRNA179	chr7	43762209	43762489	+	1	ciRNA	-	ENSSSCT00000030706	CUL9	mRNA	chr7:43762208-43762515	cullin 9 [Source:HGNC Symbol;Acc:HGNC:15982]	GO:0031461(cullin-RING ubiquitin ligase complex);GO:0005829(cytosol);GO:0016567(protein ubiquitination);GO:0007088(regulation of mitotic nuclear division);GO:0006511(ubiquitin-dependent protein catabolic process);GO:0000226(microtubule cytoskeleton organization);GO:0046872(metal ion binding);GO:0031625(ubiquitin protein ligase binding);GO:0008270(zinc ion binding)	NA	ssc-miR-432-3p	m8	-0.1995	70	147	-14.06
ciRNA179	chr7	43762209	43762489	+	1	ciRNA	-	ENSSSCT00000030706	CUL9	mRNA	chr7:43762208-43762515	cullin 9 [Source:HGNC Symbol;Acc:HGNC:15982]	GO:0031461(cullin-RING ubiquitin ligase complex);GO:0005829(cytosol);GO:0016567(protein ubiquitination);GO:0007088(regulation of mitotic nuclear division);GO:0006511(ubiquitin-dependent protein catabolic process);GO:0000226(microtubule cytoskeleton organization);GO:0046872(metal ion binding);GO:0031625(ubiquitin protein ligase binding);GO:0008270(zinc ion binding)	NA	ssc-miR-484	8mer	-0.31315	94	141	-19.45
ciRNA179	chr7	43762209	43762489	+	1	ciRNA	-	ENSSSCT00000030706	CUL9	mRNA	chr7:43762208-43762515	cullin 9 [Source:HGNC Symbol;Acc:HGNC:15982]	GO:0031461(cullin-RING ubiquitin ligase complex);GO:0005829(cytosol);GO:0016567(protein ubiquitination);GO:0007088(regulation of mitotic nuclear division);GO:0006511(ubiquitin-dependent protein catabolic process);GO:0000226(microtubule cytoskeleton organization);GO:0046872(metal ion binding);GO:0031625(ubiquitin protein ligase binding);GO:0008270(zinc ion binding)	NA	ssc-miR-708-5p	m8	-0.136	59	146	-11.83
ciRNA179	chr7	43762209	43762489	+	1	ciRNA	-	ENSSSCT00000030706	CUL9	mRNA	chr7:43762208-43762515	cullin 9 [Source:HGNC Symbol;Acc:HGNC:15982]	GO:0031461(cullin-RING ubiquitin ligase complex);GO:0005829(cytosol);GO:0016567(protein ubiquitination);GO:0007088(regulation of mitotic nuclear division);GO:0006511(ubiquitin-dependent protein catabolic process);GO:0000226(microtubule cytoskeleton organization);GO:0046872(metal ion binding);GO:0031625(ubiquitin protein ligase binding);GO:0008270(zinc ion binding)	NA	ssc-miR-9821-5p	8mer	-0.22525	82	148	-20.01
ciRNA179	chr7	43762209	43762489	+	1	ciRNA	-	ENSSSCT00000030706	CUL9	mRNA	chr7:43762208-43762515	cullin 9 [Source:HGNC Symbol;Acc:HGNC:15982]	GO:0031461(cullin-RING ubiquitin ligase complex);GO:0005829(cytosol);GO:0016567(protein ubiquitination);GO:0007088(regulation of mitotic nuclear division);GO:0006511(ubiquitin-dependent protein catabolic process);GO:0000226(microtubule cytoskeleton organization);GO:0046872(metal ion binding);GO:0031625(ubiquitin protein ligase binding);GO:0008270(zinc ion binding)	NA	ssc-miR-9822-3p	8mer	-0.22115	80	151	-24.34
ciRNA18	chr13	100731326	100731796	+	1	ciRNA	-	ENSSSCT00000012830	MBNL1	mRNA	chr13:100731325-100732013	muscleblind like splicing regulator 1 [Source:HGNC Symbol;Acc:HGNC:6923]	GO:0010494(cytoplasmic stress granule);GO:0005829(cytosol);GO:0005813(centrosome);GO:0005737(cytoplasm);GO:0005654(nucleoplasm);GO:0005634(nucleus);GO:0043484(regulation of RNA splicing);GO:0008380(RNA splicing);GO:0046872(metal ion binding);GO:0003725(double-stranded RNA binding);GO:0003723(RNA binding)	NA	ssc-miR-181a	m8	-0.2865	88	156	-12.98
ciRNA18	chr13	100731326	100731796	+	1	ciRNA	-	ENSSSCT00000012830	MBNL1	mRNA	chr13:100731325-100732013	muscleblind like splicing regulator 1 [Source:HGNC Symbol;Acc:HGNC:6923]	GO:0010494(cytoplasmic stress granule);GO:0005829(cytosol);GO:0005813(centrosome);GO:0005737(cytoplasm);GO:0005654(nucleoplasm);GO:0005634(nucleus);GO:0043484(regulation of RNA splicing);GO:0008380(RNA splicing);GO:0046872(metal ion binding);GO:0003725(double-stranded RNA binding);GO:0003723(RNA binding)	NA	ssc-miR-181b	m8	-0.2865	88	145	-12.94
ciRNA18	chr13	100731326	100731796	+	1	ciRNA	-	ENSSSCT00000012830	MBNL1	mRNA	chr13:100731325-100732013	muscleblind like splicing regulator 1 [Source:HGNC Symbol;Acc:HGNC:6923]	GO:0010494(cytoplasmic stress granule);GO:0005829(cytosol);GO:0005813(centrosome);GO:0005737(cytoplasm);GO:0005654(nucleoplasm);GO:0005634(nucleus);GO:0043484(regulation of RNA splicing);GO:0008380(RNA splicing);GO:0046872(metal ion binding);GO:0003725(double-stranded RNA binding);GO:0003723(RNA binding)	NA	ssc-miR-181c	m8	-0.271	88	152	-15.55
ciRNA18	chr13	100731326	100731796	+	1	ciRNA	-	ENSSSCT00000012830	MBNL1	mRNA	chr13:100731325-100732013	muscleblind like splicing regulator 1 [Source:HGNC Symbol;Acc:HGNC:6923]	GO:0010494(cytoplasmic stress granule);GO:0005829(cytosol);GO:0005813(centrosome);GO:0005737(cytoplasm);GO:0005654(nucleoplasm);GO:0005634(nucleus);GO:0043484(regulation of RNA splicing);GO:0008380(RNA splicing);GO:0046872(metal ion binding);GO:0003725(double-stranded RNA binding);GO:0003723(RNA binding)	NA	ssc-miR-181d-5p	m8	-0.2865	87	141	-10.95
ciRNA18	chr13	100731326	100731796	+	1	ciRNA	-	ENSSSCT00000012830	MBNL1	mRNA	chr13:100731325-100732013	muscleblind like splicing regulator 1 [Source:HGNC Symbol;Acc:HGNC:6923]	GO:0010494(cytoplasmic stress granule);GO:0005829(cytosol);GO:0005813(centrosome);GO:0005737(cytoplasm);GO:0005654(nucleoplasm);GO:0005634(nucleus);GO:0043484(regulation of RNA splicing);GO:0008380(RNA splicing);GO:0046872(metal ion binding);GO:0003725(double-stranded RNA binding);GO:0003723(RNA binding)	NA	ssc-miR-194b-3p	m8	-0.2515	86	140	-15.57
ciRNA18	chr13	100731326	100731796	+	1	ciRNA	-	ENSSSCT00000012830	MBNL1	mRNA	chr13:100731325-100732013	muscleblind like splicing regulator 1 [Source:HGNC Symbol;Acc:HGNC:6923]	GO:0010494(cytoplasmic stress granule);GO:0005829(cytosol);GO:0005813(centrosome);GO:0005737(cytoplasm);GO:0005654(nucleoplasm);GO:0005634(nucleus);GO:0043484(regulation of RNA splicing);GO:0008380(RNA splicing);GO:0046872(metal ion binding);GO:0003725(double-stranded RNA binding);GO:0003723(RNA binding)	NA	ssc-miR-301	8mer	-0.4252	97	163	-18.3
ciRNA18	chr13	100731326	100731796	+	1	ciRNA	-	ENSSSCT00000012830	MBNL1	mRNA	chr13:100731325-100732013	muscleblind like splicing regulator 1 [Source:HGNC Symbol;Acc:HGNC:6923]	GO:0010494(cytoplasmic stress granule);GO:0005829(cytosol);GO:0005813(centrosome);GO:0005737(cytoplasm);GO:0005654(nucleoplasm);GO:0005634(nucleus);GO:0043484(regulation of RNA splicing);GO:0008380(RNA splicing);GO:0046872(metal ion binding);GO:0003725(double-stranded RNA binding);GO:0003723(RNA binding)	NA	ssc-miR-423-5p	8mer	-0.42625	99	154	-22.14
ciRNA18	chr13	100731326	100731796	+	1	ciRNA	-	ENSSSCT00000012830	MBNL1	mRNA	chr13:100731325-100732013	muscleblind like splicing regulator 1 [Source:HGNC Symbol;Acc:HGNC:6923]	GO:0010494(cytoplasmic stress granule);GO:0005829(cytosol);GO:0005813(centrosome);GO:0005737(cytoplasm);GO:0005654(nucleoplasm);GO:0005634(nucleus);GO:0043484(regulation of RNA splicing);GO:0008380(RNA splicing);GO:0046872(metal ion binding);GO:0003725(double-stranded RNA binding);GO:0003723(RNA binding)	NA	ssc-miR-9798-3p	m8	-0.201	80	140	-21.25
ciRNA18	chr13	100731326	100731796	+	1	ciRNA	-	ENSSSCT00000012830	MBNL1	mRNA	chr13:100731325-100732013	muscleblind like splicing regulator 1 [Source:HGNC Symbol;Acc:HGNC:6923]	GO:0010494(cytoplasmic stress granule);GO:0005829(cytosol);GO:0005813(centrosome);GO:0005737(cytoplasm);GO:0005654(nucleoplasm);GO:0005634(nucleus);GO:0043484(regulation of RNA splicing);GO:0008380(RNA splicing);GO:0046872(metal ion binding);GO:0003725(double-stranded RNA binding);GO:0003723(RNA binding)	NA	ssc-miR-9862-3p	m8	-0.2445	82	153	-11.11
ciRNA180	chr7	52538634	52540035	-	1	ciRNA	-	ENSSSCT00000031013	MCM3	mRNA	chr7:52538602-52540035	minichromosome maintenance complex component 3 [Source:HGNC Symbol;Acc:HGNC:6945]	GO:0048471(perinuclear region of cytoplasm);GO:0042555(MCM complex);GO:0016020(membrane);GO:0005813(centrosome);GO:0005737(cytoplasm);GO:0005654(nucleoplasm);GO:0005634(nucleus);GO:0000784(nuclear chromosome, telomeric region);GO:0032508(DNA duplex unwinding);GO:0006270(DNA replication initiation);GO:0006260(DNA replication);GO:0016787(hydrolase activity);GO:0005524(ATP binding);GO:0004386(helica…	03030(DNA replication);04110(Cell cycle)	ssc-miR-128	m8	-0.149	57	143	-14.31
ciRNA180	chr7	52538634	52540035	-	1	ciRNA	-	ENSSSCT00000031013	MCM3	mRNA	chr7:52538602-52540035	minichromosome maintenance complex component 3 [Source:HGNC Symbol;Acc:HGNC:6945]	GO:0048471(perinuclear region of cytoplasm);GO:0042555(MCM complex);GO:0016020(membrane);GO:0005813(centrosome);GO:0005737(cytoplasm);GO:0005654(nucleoplasm);GO:0005634(nucleus);GO:0000784(nuclear chromosome, telomeric region);GO:0032508(DNA duplex unwinding);GO:0006270(DNA replication initiation);GO:0006260(DNA replication);GO:0016787(hydrolase activity);GO:0005524(ATP binding);GO:0004386(helica…	03030(DNA replication);04110(Cell cycle)	ssc-miR-151-5p	m8	-0.15	63	140	-16.34
ciRNA180	chr7	52538634	52540035	-	1	ciRNA	-	ENSSSCT00000031013	MCM3	mRNA	chr7:52538602-52540035	minichromosome maintenance complex component 3 [Source:HGNC Symbol;Acc:HGNC:6945]	GO:0048471(perinuclear region of cytoplasm);GO:0042555(MCM complex);GO:0016020(membrane);GO:0005813(centrosome);GO:0005737(cytoplasm);GO:0005654(nucleoplasm);GO:0005634(nucleus);GO:0000784(nuclear chromosome, telomeric region);GO:0032508(DNA duplex unwinding);GO:0006270(DNA replication initiation);GO:0006260(DNA replication);GO:0016787(hydrolase activity);GO:0005524(ATP binding);GO:0004386(helica…	03030(DNA replication);04110(Cell cycle)	ssc-miR-17-3p	8mer	-0.17925	72	151	-24.8
ciRNA180	chr7	52538634	52540035	-	1	ciRNA	-	ENSSSCT00000031013	MCM3	mRNA	chr7:52538602-52540035	minichromosome maintenance complex component 3 [Source:HGNC Symbol;Acc:HGNC:6945]	GO:0048471(perinuclear region of cytoplasm);GO:0042555(MCM complex);GO:0016020(membrane);GO:0005813(centrosome);GO:0005737(cytoplasm);GO:0005654(nucleoplasm);GO:0005634(nucleus);GO:0000784(nuclear chromosome, telomeric region);GO:0032508(DNA duplex unwinding);GO:0006270(DNA replication initiation);GO:0006260(DNA replication);GO:0016787(hydrolase activity);GO:0005524(ATP binding);GO:0004386(helica…	03030(DNA replication);04110(Cell cycle)	ssc-miR-18a	m8	-0.217	78	146	-14.88
ciRNA180	chr7	52538634	52540035	-	1	ciRNA	-	ENSSSCT00000031013	MCM3	mRNA	chr7:52538602-52540035	minichromosome maintenance complex component 3 [Source:HGNC Symbol;Acc:HGNC:6945]	GO:0048471(perinuclear region of cytoplasm);GO:0042555(MCM complex);GO:0016020(membrane);GO:0005813(centrosome);GO:0005737(cytoplasm);GO:0005654(nucleoplasm);GO:0005634(nucleus);GO:0000784(nuclear chromosome, telomeric region);GO:0032508(DNA duplex unwinding);GO:0006270(DNA replication initiation);GO:0006260(DNA replication);GO:0016787(hydrolase activity);GO:0005524(ATP binding);GO:0004386(helica…	03030(DNA replication);04110(Cell cycle)	ssc-miR-18b	m8	-0.217	78	155	-14.88
ciRNA180	chr7	52538634	52540035	-	1	ciRNA	-	ENSSSCT00000031013	MCM3	mRNA	chr7:52538602-52540035	minichromosome maintenance complex component 3 [Source:HGNC Symbol;Acc:HGNC:6945]	GO:0048471(perinuclear region of cytoplasm);GO:0042555(MCM complex);GO:0016020(membrane);GO:0005813(centrosome);GO:0005737(cytoplasm);GO:0005654(nucleoplasm);GO:0005634(nucleus);GO:0000784(nuclear chromosome, telomeric region);GO:0032508(DNA duplex unwinding);GO:0006270(DNA replication initiation);GO:0006260(DNA replication);GO:0016787(hydrolase activity);GO:0005524(ATP binding);GO:0004386(helica…	03030(DNA replication);04110(Cell cycle)	ssc-miR-192	m8	-0.1195	53	140	-11.48
ciRNA180	chr7	52538634	52540035	-	1	ciRNA	-	ENSSSCT00000031013	MCM3	mRNA	chr7:52538602-52540035	minichromosome maintenance complex component 3 [Source:HGNC Symbol;Acc:HGNC:6945]	GO:0048471(perinuclear region of cytoplasm);GO:0042555(MCM complex);GO:0016020(membrane);GO:0005813(centrosome);GO:0005737(cytoplasm);GO:0005654(nucleoplasm);GO:0005634(nucleus);GO:0000784(nuclear chromosome, telomeric region);GO:0032508(DNA duplex unwinding);GO:0006270(DNA replication initiation);GO:0006260(DNA replication);GO:0016787(hydrolase activity);GO:0005524(ATP binding);GO:0004386(helica…	03030(DNA replication);04110(Cell cycle)	ssc-miR-212	1a	-0.13075	52	143	-20.25
ciRNA180	chr7	52538634	52540035	-	1	ciRNA	-	ENSSSCT00000031013	MCM3	mRNA	chr7:52538602-52540035	minichromosome maintenance complex component 3 [Source:HGNC Symbol;Acc:HGNC:6945]	GO:0048471(perinuclear region of cytoplasm);GO:0042555(MCM complex);GO:0016020(membrane);GO:0005813(centrosome);GO:0005737(cytoplasm);GO:0005654(nucleoplasm);GO:0005634(nucleus);GO:0000784(nuclear chromosome, telomeric region);GO:0032508(DNA duplex unwinding);GO:0006270(DNA replication initiation);GO:0006260(DNA replication);GO:0016787(hydrolase activity);GO:0005524(ATP binding);GO:0004386(helica…	03030(DNA replication);04110(Cell cycle)	ssc-miR-215	m8	-0.1195	54	140	-11.41
ciRNA180	chr7	52538634	52540035	-	1	ciRNA	-	ENSSSCT00000031013	MCM3	mRNA	chr7:52538602-52540035	minichromosome maintenance complex component 3 [Source:HGNC Symbol;Acc:HGNC:6945]	GO:0048471(perinuclear region of cytoplasm);GO:0042555(MCM complex);GO:0016020(membrane);GO:0005813(centrosome);GO:0005737(cytoplasm);GO:0005654(nucleoplasm);GO:0005634(nucleus);GO:0000784(nuclear chromosome, telomeric region);GO:0032508(DNA duplex unwinding);GO:0006270(DNA replication initiation);GO:0006260(DNA replication);GO:0016787(hydrolase activity);GO:0005524(ATP binding);GO:0004386(helica…	03030(DNA replication);04110(Cell cycle)	ssc-miR-2320-5p	m8	-0.304	91	165	-25.34
ciRNA180	chr7	52538634	52540035	-	1	ciRNA	-	ENSSSCT00000031013	MCM3	mRNA	chr7:52538602-52540035	minichromosome maintenance complex component 3 [Source:HGNC Symbol;Acc:HGNC:6945]	GO:0048471(perinuclear region of cytoplasm);GO:0042555(MCM complex);GO:0016020(membrane);GO:0005813(centrosome);GO:0005737(cytoplasm);GO:0005654(nucleoplasm);GO:0005634(nucleus);GO:0000784(nuclear chromosome, telomeric region);GO:0032508(DNA duplex unwinding);GO:0006270(DNA replication initiation);GO:0006260(DNA replication);GO:0016787(hydrolase activity);GO:0005524(ATP binding);GO:0004386(helica…	03030(DNA replication);04110(Cell cycle)	ssc-miR-24-3p	8mer	-0.31815	93	140	-18.87
ciRNA180	chr7	52538634	52540035	-	1	ciRNA	-	ENSSSCT00000031013	MCM3	mRNA	chr7:52538602-52540035	minichromosome maintenance complex component 3 [Source:HGNC Symbol;Acc:HGNC:6945]	GO:0048471(perinuclear region of cytoplasm);GO:0042555(MCM complex);GO:0016020(membrane);GO:0005813(centrosome);GO:0005737(cytoplasm);GO:0005654(nucleoplasm);GO:0005634(nucleus);GO:0000784(nuclear chromosome, telomeric region);GO:0032508(DNA duplex unwinding);GO:0006270(DNA replication initiation);GO:0006260(DNA replication);GO:0016787(hydrolase activity);GO:0005524(ATP binding);GO:0004386(helica…	03030(DNA replication);04110(Cell cycle)	ssc-miR-30c-1-3p	m8	-0.1845	76	160	-24.2
ciRNA180	chr7	52538634	52540035	-	1	ciRNA	-	ENSSSCT00000031013	MCM3	mRNA	chr7:52538602-52540035	minichromosome maintenance complex component 3 [Source:HGNC Symbol;Acc:HGNC:6945]	GO:0048471(perinuclear region of cytoplasm);GO:0042555(MCM complex);GO:0016020(membrane);GO:0005813(centrosome);GO:0005737(cytoplasm);GO:0005654(nucleoplasm);GO:0005634(nucleus);GO:0000784(nuclear chromosome, telomeric region);GO:0032508(DNA duplex unwinding);GO:0006270(DNA replication initiation);GO:0006260(DNA replication);GO:0016787(hydrolase activity);GO:0005524(ATP binding);GO:0004386(helica…	03030(DNA replication);04110(Cell cycle)	ssc-miR-30c-3p	m8	-0.1845	75	165	-24.28
ciRNA180	chr7	52538634	52540035	-	1	ciRNA	-	ENSSSCT00000031013	MCM3	mRNA	chr7:52538602-52540035	minichromosome maintenance complex component 3 [Source:HGNC Symbol;Acc:HGNC:6945]	GO:0048471(perinuclear region of cytoplasm);GO:0042555(MCM complex);GO:0016020(membrane);GO:0005813(centrosome);GO:0005737(cytoplasm);GO:0005654(nucleoplasm);GO:0005634(nucleus);GO:0000784(nuclear chromosome, telomeric region);GO:0032508(DNA duplex unwinding);GO:0006270(DNA replication initiation);GO:0006260(DNA replication);GO:0016787(hydrolase activity);GO:0005524(ATP binding);GO:0004386(helica…	03030(DNA replication);04110(Cell cycle)	ssc-miR-31	m8	-0.1615	59	157	-21.79
ciRNA180	chr7	52538634	52540035	-	1	ciRNA	-	ENSSSCT00000031013	MCM3	mRNA	chr7:52538602-52540035	minichromosome maintenance complex component 3 [Source:HGNC Symbol;Acc:HGNC:6945]	GO:0048471(perinuclear region of cytoplasm);GO:0042555(MCM complex);GO:0016020(membrane);GO:0005813(centrosome);GO:0005737(cytoplasm);GO:0005654(nucleoplasm);GO:0005634(nucleus);GO:0000784(nuclear chromosome, telomeric region);GO:0032508(DNA duplex unwinding);GO:0006270(DNA replication initiation);GO:0006260(DNA replication);GO:0016787(hydrolase activity);GO:0005524(ATP binding);GO:0004386(helica…	03030(DNA replication);04110(Cell cycle)	ssc-miR-320	m8	-0.173	56	146	-13.87
ciRNA180	chr7	52538634	52540035	-	1	ciRNA	-	ENSSSCT00000031013	MCM3	mRNA	chr7:52538602-52540035	minichromosome maintenance complex component 3 [Source:HGNC Symbol;Acc:HGNC:6945]	GO:0048471(perinuclear region of cytoplasm);GO:0042555(MCM complex);GO:0016020(membrane);GO:0005813(centrosome);GO:0005737(cytoplasm);GO:0005654(nucleoplasm);GO:0005634(nucleus);GO:0000784(nuclear chromosome, telomeric region);GO:0032508(DNA duplex unwinding);GO:0006270(DNA replication initiation);GO:0006260(DNA replication);GO:0016787(hydrolase activity);GO:0005524(ATP binding);GO:0004386(helica…	03030(DNA replication);04110(Cell cycle)	ssc-miR-324	m8	-0.1665	72	153	-19.94
ciRNA180	chr7	52538634	52540035	-	1	ciRNA	-	ENSSSCT00000031013	MCM3	mRNA	chr7:52538602-52540035	minichromosome maintenance complex component 3 [Source:HGNC Symbol;Acc:HGNC:6945]	GO:0048471(perinuclear region of cytoplasm);GO:0042555(MCM complex);GO:0016020(membrane);GO:0005813(centrosome);GO:0005737(cytoplasm);GO:0005654(nucleoplasm);GO:0005634(nucleus);GO:0000784(nuclear chromosome, telomeric region);GO:0032508(DNA duplex unwinding);GO:0006270(DNA replication initiation);GO:0006260(DNA replication);GO:0016787(hydrolase activity);GO:0005524(ATP binding);GO:0004386(helica…	03030(DNA replication);04110(Cell cycle)	ssc-miR-338	8mer	-0.27715	87	152	-19.89
ciRNA180	chr7	52538634	52540035	-	1	ciRNA	-	ENSSSCT00000031013	MCM3	mRNA	chr7:52538602-52540035	minichromosome maintenance complex component 3 [Source:HGNC Symbol;Acc:HGNC:6945]	GO:0048471(perinuclear region of cytoplasm);GO:0042555(MCM complex);GO:0016020(membrane);GO:0005813(centrosome);GO:0005737(cytoplasm);GO:0005654(nucleoplasm);GO:0005634(nucleus);GO:0000784(nuclear chromosome, telomeric region);GO:0032508(DNA duplex unwinding);GO:0006270(DNA replication initiation);GO:0006260(DNA replication);GO:0016787(hydrolase activity);GO:0005524(ATP binding);GO:0004386(helica…	03030(DNA replication);04110(Cell cycle)	ssc-miR-340	8mer	-0.3752	94	158	-17.11
ciRNA180	chr7	52538634	52540035	-	1	ciRNA	-	ENSSSCT00000031013	MCM3	mRNA	chr7:52538602-52540035	minichromosome maintenance complex component 3 [Source:HGNC Symbol;Acc:HGNC:6945]	GO:0048471(perinuclear region of cytoplasm);GO:0042555(MCM complex);GO:0016020(membrane);GO:0005813(centrosome);GO:0005737(cytoplasm);GO:0005654(nucleoplasm);GO:0005634(nucleus);GO:0000784(nuclear chromosome, telomeric region);GO:0032508(DNA duplex unwinding);GO:0006270(DNA replication initiation);GO:0006260(DNA replication);GO:0016787(hydrolase activity);GO:0005524(ATP binding);GO:0004386(helica…	03030(DNA replication);04110(Cell cycle)	ssc-miR-371-5p	m8	-0.2065	76	149	-14.47
ciRNA180	chr7	52538634	52540035	-	1	ciRNA	-	ENSSSCT00000031013	MCM3	mRNA	chr7:52538602-52540035	minichromosome maintenance complex component 3 [Source:HGNC Symbol;Acc:HGNC:6945]	GO:0048471(perinuclear region of cytoplasm);GO:0042555(MCM complex);GO:0016020(membrane);GO:0005813(centrosome);GO:0005737(cytoplasm);GO:0005654(nucleoplasm);GO:0005634(nucleus);GO:0000784(nuclear chromosome, telomeric region);GO:0032508(DNA duplex unwinding);GO:0006270(DNA replication initiation);GO:0006260(DNA replication);GO:0016787(hydrolase activity);GO:0005524(ATP binding);GO:0004386(helica…	03030(DNA replication);04110(Cell cycle)	ssc-miR-383	8mer	-0.26625	87	144	-15.71
ciRNA180	chr7	52538634	52540035	-	1	ciRNA	-	ENSSSCT00000031013	MCM3	mRNA	chr7:52538602-52540035	minichromosome maintenance complex component 3 [Source:HGNC Symbol;Acc:HGNC:6945]	GO:0048471(perinuclear region of cytoplasm);GO:0042555(MCM complex);GO:0016020(membrane);GO:0005813(centrosome);GO:0005737(cytoplasm);GO:0005654(nucleoplasm);GO:0005634(nucleus);GO:0000784(nuclear chromosome, telomeric region);GO:0032508(DNA duplex unwinding);GO:0006270(DNA replication initiation);GO:0006260(DNA replication);GO:0016787(hydrolase activity);GO:0005524(ATP binding);GO:0004386(helica…	03030(DNA replication);04110(Cell cycle)	ssc-miR-4331	8mer	-0.26075	86	195	-44.19
ciRNA180	chr7	52538634	52540035	-	1	ciRNA	-	ENSSSCT00000031013	MCM3	mRNA	chr7:52538602-52540035	minichromosome maintenance complex component 3 [Source:HGNC Symbol;Acc:HGNC:6945]	GO:0048471(perinuclear region of cytoplasm);GO:0042555(MCM complex);GO:0016020(membrane);GO:0005813(centrosome);GO:0005737(cytoplasm);GO:0005654(nucleoplasm);GO:0005634(nucleus);GO:0000784(nuclear chromosome, telomeric region);GO:0032508(DNA duplex unwinding);GO:0006270(DNA replication initiation);GO:0006260(DNA replication);GO:0016787(hydrolase activity);GO:0005524(ATP binding);GO:0004386(helica…	03030(DNA replication);04110(Cell cycle)	ssc-miR-450c-3p	m8	-0.169	60	148	-15.11
ciRNA180	chr7	52538634	52540035	-	1	ciRNA	-	ENSSSCT00000031013	MCM3	mRNA	chr7:52538602-52540035	minichromosome maintenance complex component 3 [Source:HGNC Symbol;Acc:HGNC:6945]	GO:0048471(perinuclear region of cytoplasm);GO:0042555(MCM complex);GO:0016020(membrane);GO:0005813(centrosome);GO:0005737(cytoplasm);GO:0005654(nucleoplasm);GO:0005634(nucleus);GO:0000784(nuclear chromosome, telomeric region);GO:0032508(DNA duplex unwinding);GO:0006270(DNA replication initiation);GO:0006260(DNA replication);GO:0016787(hydrolase activity);GO:0005524(ATP binding);GO:0004386(helica…	03030(DNA replication);04110(Cell cycle)	ssc-miR-493-3p	m8	-0.182	68	150	-17.38
ciRNA180	chr7	52538634	52540035	-	1	ciRNA	-	ENSSSCT00000031013	MCM3	mRNA	chr7:52538602-52540035	minichromosome maintenance complex component 3 [Source:HGNC Symbol;Acc:HGNC:6945]	GO:0048471(perinuclear region of cytoplasm);GO:0042555(MCM complex);GO:0016020(membrane);GO:0005813(centrosome);GO:0005737(cytoplasm);GO:0005654(nucleoplasm);GO:0005634(nucleus);GO:0000784(nuclear chromosome, telomeric region);GO:0032508(DNA duplex unwinding);GO:0006270(DNA replication initiation);GO:0006260(DNA replication);GO:0016787(hydrolase activity);GO:0005524(ATP binding);GO:0004386(helica…	03030(DNA replication);04110(Cell cycle)	ssc-miR-551a	m8	-0.181	64	147	-18.97
ciRNA180	chr7	52538634	52540035	-	1	ciRNA	-	ENSSSCT00000031013	MCM3	mRNA	chr7:52538602-52540035	minichromosome maintenance complex component 3 [Source:HGNC Symbol;Acc:HGNC:6945]	GO:0048471(perinuclear region of cytoplasm);GO:0042555(MCM complex);GO:0016020(membrane);GO:0005813(centrosome);GO:0005737(cytoplasm);GO:0005654(nucleoplasm);GO:0005634(nucleus);GO:0000784(nuclear chromosome, telomeric region);GO:0032508(DNA duplex unwinding);GO:0006270(DNA replication initiation);GO:0006260(DNA replication);GO:0016787(hydrolase activity);GO:0005524(ATP binding);GO:0004386(helica…	03030(DNA replication);04110(Cell cycle)	ssc-miR-7136-5p	m8	-0.1515	50	141	-16.33
ciRNA180	chr7	52538634	52540035	-	1	ciRNA	-	ENSSSCT00000031013	MCM3	mRNA	chr7:52538602-52540035	minichromosome maintenance complex component 3 [Source:HGNC Symbol;Acc:HGNC:6945]	GO:0048471(perinuclear region of cytoplasm);GO:0042555(MCM complex);GO:0016020(membrane);GO:0005813(centrosome);GO:0005737(cytoplasm);GO:0005654(nucleoplasm);GO:0005634(nucleus);GO:0000784(nuclear chromosome, telomeric region);GO:0032508(DNA duplex unwinding);GO:0006270(DNA replication initiation);GO:0006260(DNA replication);GO:0016787(hydrolase activity);GO:0005524(ATP binding);GO:0004386(helica…	03030(DNA replication);04110(Cell cycle)	ssc-miR-7138-3p	m8	-0.1545	56	145	-22.32
ciRNA180	chr7	52538634	52540035	-	1	ciRNA	-	ENSSSCT00000031013	MCM3	mRNA	chr7:52538602-52540035	minichromosome maintenance complex component 3 [Source:HGNC Symbol;Acc:HGNC:6945]	GO:0048471(perinuclear region of cytoplasm);GO:0042555(MCM complex);GO:0016020(membrane);GO:0005813(centrosome);GO:0005737(cytoplasm);GO:0005654(nucleoplasm);GO:0005634(nucleus);GO:0000784(nuclear chromosome, telomeric region);GO:0032508(DNA duplex unwinding);GO:0006270(DNA replication initiation);GO:0006260(DNA replication);GO:0016787(hydrolase activity);GO:0005524(ATP binding);GO:0004386(helica…	03030(DNA replication);04110(Cell cycle)	ssc-miR-9792-5p	8mer	-0.4272	98	153	-13.75
ciRNA180	chr7	52538634	52540035	-	1	ciRNA	-	ENSSSCT00000031013	MCM3	mRNA	chr7:52538602-52540035	minichromosome maintenance complex component 3 [Source:HGNC Symbol;Acc:HGNC:6945]	GO:0048471(perinuclear region of cytoplasm);GO:0042555(MCM complex);GO:0016020(membrane);GO:0005813(centrosome);GO:0005737(cytoplasm);GO:0005654(nucleoplasm);GO:0005634(nucleus);GO:0000784(nuclear chromosome, telomeric region);GO:0032508(DNA duplex unwinding);GO:0006270(DNA replication initiation);GO:0006260(DNA replication);GO:0016787(hydrolase activity);GO:0005524(ATP binding);GO:0004386(helica…	03030(DNA replication);04110(Cell cycle)	ssc-miR-9794-3p	8mer	-0.2623	84	161	-19.41
ciRNA180	chr7	52538634	52540035	-	1	ciRNA	-	ENSSSCT00000031013	MCM3	mRNA	chr7:52538602-52540035	minichromosome maintenance complex component 3 [Source:HGNC Symbol;Acc:HGNC:6945]	GO:0048471(perinuclear region of cytoplasm);GO:0042555(MCM complex);GO:0016020(membrane);GO:0005813(centrosome);GO:0005737(cytoplasm);GO:0005654(nucleoplasm);GO:0005634(nucleus);GO:0000784(nuclear chromosome, telomeric region);GO:0032508(DNA duplex unwinding);GO:0006270(DNA replication initiation);GO:0006260(DNA replication);GO:0016787(hydrolase activity);GO:0005524(ATP binding);GO:0004386(helica…	03030(DNA replication);04110(Cell cycle)	ssc-miR-9847-3p	m8	-0.196	76	153	-22.61
ciRNA180	chr7	52538634	52540035	-	1	ciRNA	-	ENSSSCT00000031013	MCM3	mRNA	chr7:52538602-52540035	minichromosome maintenance complex component 3 [Source:HGNC Symbol;Acc:HGNC:6945]	GO:0048471(perinuclear region of cytoplasm);GO:0042555(MCM complex);GO:0016020(membrane);GO:0005813(centrosome);GO:0005737(cytoplasm);GO:0005654(nucleoplasm);GO:0005634(nucleus);GO:0000784(nuclear chromosome, telomeric region);GO:0032508(DNA duplex unwinding);GO:0006270(DNA replication initiation);GO:0006260(DNA replication);GO:0016787(hydrolase activity);GO:0005524(ATP binding);GO:0004386(helica…	03030(DNA replication);04110(Cell cycle)	ssc-miR-9849-5p	m8	-0.1535	57	154	-19.51
ciRNA180	chr7	52538634	52540035	-	1	ciRNA	-	ENSSSCT00000031013	MCM3	mRNA	chr7:52538602-52540035	minichromosome maintenance complex component 3 [Source:HGNC Symbol;Acc:HGNC:6945]	GO:0048471(perinuclear region of cytoplasm);GO:0042555(MCM complex);GO:0016020(membrane);GO:0005813(centrosome);GO:0005737(cytoplasm);GO:0005654(nucleoplasm);GO:0005634(nucleus);GO:0000784(nuclear chromosome, telomeric region);GO:0032508(DNA duplex unwinding);GO:0006270(DNA replication initiation);GO:0006260(DNA replication);GO:0016787(hydrolase activity);GO:0005524(ATP binding);GO:0004386(helica…	03030(DNA replication);04110(Cell cycle)	ssc-miR-9857-5p	m8	-0.1945	70	144	-22.43
ciRNA181	chr7	58511854	58512098	+	1	ciRNA	-	ENSSSCT00000002037	FES	mRNA	chr7:58511853-58512180	FES proto-oncogene, tyrosine kinase [Source:HGNC Symbol;Acc:HGNC:3657]	GO:0031410(cytoplasmic vesicle);GO:0031234(extrinsic component of cytoplasmic side of plasma membrane);GO:0015630(microtubule cytoskeleton);GO:0005925(focal adhesion);GO:0005856(cytoskeleton);GO:0005737(cytoplasm);GO:2000251(positive regulation of actin cytoskeleton reorganization);GO:2000145(regulation of cell motility);GO:0051297(centrosome organization);GO:0046777(protein autophosphorylation);…	04360(Axon guidance)	ssc-miR-124a	m8	-0.1615	55	144	-19.69
ciRNA181	chr7	58511854	58512098	+	1	ciRNA	-	ENSSSCT00000002037	FES	mRNA	chr7:58511853-58512180	FES proto-oncogene, tyrosine kinase [Source:HGNC Symbol;Acc:HGNC:3657]	GO:0031410(cytoplasmic vesicle);GO:0031234(extrinsic component of cytoplasmic side of plasma membrane);GO:0015630(microtubule cytoskeleton);GO:0005925(focal adhesion);GO:0005856(cytoskeleton);GO:0005737(cytoplasm);GO:2000251(positive regulation of actin cytoskeleton reorganization);GO:2000145(regulation of cell motility);GO:0051297(centrosome organization);GO:0046777(protein autophosphorylation);…	04360(Axon guidance)	ssc-miR-339-3p	m8	-0.196	72	140	-19.1
ciRNA181	chr7	58511854	58512098	+	1	ciRNA	-	ENSSSCT00000002037	FES	mRNA	chr7:58511853-58512180	FES proto-oncogene, tyrosine kinase [Source:HGNC Symbol;Acc:HGNC:3657]	GO:0031410(cytoplasmic vesicle);GO:0031234(extrinsic component of cytoplasmic side of plasma membrane);GO:0015630(microtubule cytoskeleton);GO:0005925(focal adhesion);GO:0005856(cytoskeleton);GO:0005737(cytoplasm);GO:2000251(positive regulation of actin cytoskeleton reorganization);GO:2000145(regulation of cell motility);GO:0051297(centrosome organization);GO:0046777(protein autophosphorylation);…	04360(Axon guidance)	ssc-miR-9803-5p	8mer	-0.3692	91	150	-17.25
ciRNA182	chr7	65565442	65566128	+	1	ciRNA	-	ENSSSCT00000002159	PKM	mRNA	chr7:65565441-65566155	pyruvate kinase, muscle [Source:HGNC Symbol;Acc:HGNC:9021]	GO:1903561(extracellular vesicle);GO:0070062(extracellular exosome);GO:0043209(myelin sheath);GO:0031982(vesicle);GO:0031012(extracellular matrix);GO:0005929(cilium);GO:0005829(cytosol);GO:0005739(mitochondrion);GO:0005737(cytoplasm);GO:0005634(nucleus);GO:0032869(cellular response to insulin stimulus);GO:0016310(phosphorylation);GO:0012501(programmed cell death);GO:0006096(glycolytic process);GO…	01200(Carbon metabolism);01230(Biosynthesis of amino acids);00010(Glycolysis / Gluconeogenesis);00620(Pyruvate metabolism);00230(Purine metabolism);04922(Glucagon signaling pathway);05230(Central carbon metabolism in cancer);05203(Viral carcinogenesis);04930(Type II diabetes mellitus)	ssc-miR-196b-3p	8mer	-0.2132	73	150	-17.59
ciRNA182	chr7	65565442	65566128	+	1	ciRNA	-	ENSSSCT00000002159	PKM	mRNA	chr7:65565441-65566155	pyruvate kinase, muscle [Source:HGNC Symbol;Acc:HGNC:9021]	GO:1903561(extracellular vesicle);GO:0070062(extracellular exosome);GO:0043209(myelin sheath);GO:0031982(vesicle);GO:0031012(extracellular matrix);GO:0005929(cilium);GO:0005829(cytosol);GO:0005739(mitochondrion);GO:0005737(cytoplasm);GO:0005634(nucleus);GO:0032869(cellular response to insulin stimulus);GO:0016310(phosphorylation);GO:0012501(programmed cell death);GO:0006096(glycolytic process);GO…	01200(Carbon metabolism);01230(Biosynthesis of amino acids);00010(Glycolysis / Gluconeogenesis);00620(Pyruvate metabolism);00230(Purine metabolism);04922(Glucagon signaling pathway);05230(Central carbon metabolism in cancer);05203(Viral carcinogenesis);04930(Type II diabetes mellitus)	ssc-miR-22-3p	m8	-0.186	68	147	-19.27
ciRNA182	chr7	65565442	65566128	+	1	ciRNA	-	ENSSSCT00000002159	PKM	mRNA	chr7:65565441-65566155	pyruvate kinase, muscle [Source:HGNC Symbol;Acc:HGNC:9021]	GO:1903561(extracellular vesicle);GO:0070062(extracellular exosome);GO:0043209(myelin sheath);GO:0031982(vesicle);GO:0031012(extracellular matrix);GO:0005929(cilium);GO:0005829(cytosol);GO:0005739(mitochondrion);GO:0005737(cytoplasm);GO:0005634(nucleus);GO:0032869(cellular response to insulin stimulus);GO:0016310(phosphorylation);GO:0012501(programmed cell death);GO:0006096(glycolytic process);GO…	01200(Carbon metabolism);01230(Biosynthesis of amino acids);00010(Glycolysis / Gluconeogenesis);00620(Pyruvate metabolism);00230(Purine metabolism);04922(Glucagon signaling pathway);05230(Central carbon metabolism in cancer);05203(Viral carcinogenesis);04930(Type II diabetes mellitus)	ssc-miR-221-5p	m8	-0.229	78	161	-19.36
ciRNA182	chr7	65565442	65566128	+	1	ciRNA	-	ENSSSCT00000002159	PKM	mRNA	chr7:65565441-65566155	pyruvate kinase, muscle [Source:HGNC Symbol;Acc:HGNC:9021]	GO:1903561(extracellular vesicle);GO:0070062(extracellular exosome);GO:0043209(myelin sheath);GO:0031982(vesicle);GO:0031012(extracellular matrix);GO:0005929(cilium);GO:0005829(cytosol);GO:0005739(mitochondrion);GO:0005737(cytoplasm);GO:0005634(nucleus);GO:0032869(cellular response to insulin stimulus);GO:0016310(phosphorylation);GO:0012501(programmed cell death);GO:0006096(glycolytic process);GO…	01200(Carbon metabolism);01230(Biosynthesis of amino acids);00010(Glycolysis / Gluconeogenesis);00620(Pyruvate metabolism);00230(Purine metabolism);04922(Glucagon signaling pathway);05230(Central carbon metabolism in cancer);05203(Viral carcinogenesis);04930(Type II diabetes mellitus)	ssc-miR-361-3p	8mer	-0.35525	96	143	-20.14
ciRNA182	chr7	65565442	65566128	+	1	ciRNA	-	ENSSSCT00000002159	PKM	mRNA	chr7:65565441-65566155	pyruvate kinase, muscle [Source:HGNC Symbol;Acc:HGNC:9021]	GO:1903561(extracellular vesicle);GO:0070062(extracellular exosome);GO:0043209(myelin sheath);GO:0031982(vesicle);GO:0031012(extracellular matrix);GO:0005929(cilium);GO:0005829(cytosol);GO:0005739(mitochondrion);GO:0005737(cytoplasm);GO:0005634(nucleus);GO:0032869(cellular response to insulin stimulus);GO:0016310(phosphorylation);GO:0012501(programmed cell death);GO:0006096(glycolytic process);GO…	01200(Carbon metabolism);01230(Biosynthesis of amino acids);00010(Glycolysis / Gluconeogenesis);00620(Pyruvate metabolism);00230(Purine metabolism);04922(Glucagon signaling pathway);05230(Central carbon metabolism in cancer);05203(Viral carcinogenesis);04930(Type II diabetes mellitus)	ssc-miR-490	8mer	-0.2982	89	142	-14.69
ciRNA182	chr7	65565442	65566128	+	1	ciRNA	-	ENSSSCT00000002159	PKM	mRNA	chr7:65565441-65566155	pyruvate kinase, muscle [Source:HGNC Symbol;Acc:HGNC:9021]	GO:1903561(extracellular vesicle);GO:0070062(extracellular exosome);GO:0043209(myelin sheath);GO:0031982(vesicle);GO:0031012(extracellular matrix);GO:0005929(cilium);GO:0005829(cytosol);GO:0005739(mitochondrion);GO:0005737(cytoplasm);GO:0005634(nucleus);GO:0032869(cellular response to insulin stimulus);GO:0016310(phosphorylation);GO:0012501(programmed cell death);GO:0006096(glycolytic process);GO…	01200(Carbon metabolism);01230(Biosynthesis of amino acids);00010(Glycolysis / Gluconeogenesis);00620(Pyruvate metabolism);00230(Purine metabolism);04922(Glucagon signaling pathway);05230(Central carbon metabolism in cancer);05203(Viral carcinogenesis);04930(Type II diabetes mellitus)	ssc-miR-490-3p	8mer	-0.2982	89	142	-14.69
ciRNA182	chr7	65565442	65566128	+	1	ciRNA	-	ENSSSCT00000002159	PKM	mRNA	chr7:65565441-65566155	pyruvate kinase, muscle [Source:HGNC Symbol;Acc:HGNC:9021]	GO:1903561(extracellular vesicle);GO:0070062(extracellular exosome);GO:0043209(myelin sheath);GO:0031982(vesicle);GO:0031012(extracellular matrix);GO:0005929(cilium);GO:0005829(cytosol);GO:0005739(mitochondrion);GO:0005737(cytoplasm);GO:0005634(nucleus);GO:0032869(cellular response to insulin stimulus);GO:0016310(phosphorylation);GO:0012501(programmed cell death);GO:0006096(glycolytic process);GO…	01200(Carbon metabolism);01230(Biosynthesis of amino acids);00010(Glycolysis / Gluconeogenesis);00620(Pyruvate metabolism);00230(Purine metabolism);04922(Glucagon signaling pathway);05230(Central carbon metabolism in cancer);05203(Viral carcinogenesis);04930(Type II diabetes mellitus)	ssc-miR-490-5p	m8	-0.1965	76	142	-13
ciRNA182	chr7	65565442	65566128	+	1	ciRNA	-	ENSSSCT00000002159	PKM	mRNA	chr7:65565441-65566155	pyruvate kinase, muscle [Source:HGNC Symbol;Acc:HGNC:9021]	GO:1903561(extracellular vesicle);GO:0070062(extracellular exosome);GO:0043209(myelin sheath);GO:0031982(vesicle);GO:0031012(extracellular matrix);GO:0005929(cilium);GO:0005829(cytosol);GO:0005739(mitochondrion);GO:0005737(cytoplasm);GO:0005634(nucleus);GO:0032869(cellular response to insulin stimulus);GO:0016310(phosphorylation);GO:0012501(programmed cell death);GO:0006096(glycolytic process);GO…	01200(Carbon metabolism);01230(Biosynthesis of amino acids);00010(Glycolysis / Gluconeogenesis);00620(Pyruvate metabolism);00230(Purine metabolism);04922(Glucagon signaling pathway);05230(Central carbon metabolism in cancer);05203(Viral carcinogenesis);04930(Type II diabetes mellitus)	ssc-miR-504	m8	-0.188	68	159	-21.76
ciRNA182	chr7	65565442	65566128	+	1	ciRNA	-	ENSSSCT00000002159	PKM	mRNA	chr7:65565441-65566155	pyruvate kinase, muscle [Source:HGNC Symbol;Acc:HGNC:9021]	GO:1903561(extracellular vesicle);GO:0070062(extracellular exosome);GO:0043209(myelin sheath);GO:0031982(vesicle);GO:0031012(extracellular matrix);GO:0005929(cilium);GO:0005829(cytosol);GO:0005739(mitochondrion);GO:0005737(cytoplasm);GO:0005634(nucleus);GO:0032869(cellular response to insulin stimulus);GO:0016310(phosphorylation);GO:0012501(programmed cell death);GO:0006096(glycolytic process);GO…	01200(Carbon metabolism);01230(Biosynthesis of amino acids);00010(Glycolysis / Gluconeogenesis);00620(Pyruvate metabolism);00230(Purine metabolism);04922(Glucagon signaling pathway);05230(Central carbon metabolism in cancer);05203(Viral carcinogenesis);04930(Type II diabetes mellitus)	ssc-miR-9788-3p	m8	-0.197	76	142	-16.85
ciRNA182	chr7	65565442	65566128	+	1	ciRNA	-	ENSSSCT00000002159	PKM	mRNA	chr7:65565441-65566155	pyruvate kinase, muscle [Source:HGNC Symbol;Acc:HGNC:9021]	GO:1903561(extracellular vesicle);GO:0070062(extracellular exosome);GO:0043209(myelin sheath);GO:0031982(vesicle);GO:0031012(extracellular matrix);GO:0005929(cilium);GO:0005829(cytosol);GO:0005739(mitochondrion);GO:0005737(cytoplasm);GO:0005634(nucleus);GO:0032869(cellular response to insulin stimulus);GO:0016310(phosphorylation);GO:0012501(programmed cell death);GO:0006096(glycolytic process);GO…	01200(Carbon metabolism);01230(Biosynthesis of amino acids);00010(Glycolysis / Gluconeogenesis);00620(Pyruvate metabolism);00230(Purine metabolism);04922(Glucagon signaling pathway);05230(Central carbon metabolism in cancer);05203(Viral carcinogenesis);04930(Type II diabetes mellitus)	ssc-miR-9834-5p	m8	-0.156	64	156	-19.68
ciRNA182	chr7	65565442	65566128	+	1	ciRNA	-	ENSSSCT00000002159	PKM	mRNA	chr7:65565441-65566155	pyruvate kinase, muscle [Source:HGNC Symbol;Acc:HGNC:9021]	GO:1903561(extracellular vesicle);GO:0070062(extracellular exosome);GO:0043209(myelin sheath);GO:0031982(vesicle);GO:0031012(extracellular matrix);GO:0005929(cilium);GO:0005829(cytosol);GO:0005739(mitochondrion);GO:0005737(cytoplasm);GO:0005634(nucleus);GO:0032869(cellular response to insulin stimulus);GO:0016310(phosphorylation);GO:0012501(programmed cell death);GO:0006096(glycolytic process);GO…	01200(Carbon metabolism);01230(Biosynthesis of amino acids);00010(Glycolysis / Gluconeogenesis);00620(Pyruvate metabolism);00230(Purine metabolism);04922(Glucagon signaling pathway);05230(Central carbon metabolism in cancer);05203(Viral carcinogenesis);04930(Type II diabetes mellitus)	ssc-miR-9858-5p	8mer	-0.38325	93	146	-18.73
ciRNA183	chr7	65565442	65566131	+	1	ciRNA	-	ENSSSCT00000002159	PKM	mRNA	chr7:65565441-65566155	pyruvate kinase, muscle [Source:HGNC Symbol;Acc:HGNC:9021]	GO:1903561(extracellular vesicle);GO:0070062(extracellular exosome);GO:0043209(myelin sheath);GO:0031982(vesicle);GO:0031012(extracellular matrix);GO:0005929(cilium);GO:0005829(cytosol);GO:0005739(mitochondrion);GO:0005737(cytoplasm);GO:0005634(nucleus);GO:0032869(cellular response to insulin stimulus);GO:0016310(phosphorylation);GO:0012501(programmed cell death);GO:0006096(glycolytic process);GO…	01200(Carbon metabolism);01230(Biosynthesis of amino acids);00010(Glycolysis / Gluconeogenesis);00620(Pyruvate metabolism);00230(Purine metabolism);04922(Glucagon signaling pathway);05230(Central carbon metabolism in cancer);05203(Viral carcinogenesis);04930(Type II diabetes mellitus)	ssc-miR-196b-3p	8mer	-0.2122	72	150	-17.59
ciRNA183	chr7	65565442	65566131	+	1	ciRNA	-	ENSSSCT00000002159	PKM	mRNA	chr7:65565441-65566155	pyruvate kinase, muscle [Source:HGNC Symbol;Acc:HGNC:9021]	GO:1903561(extracellular vesicle);GO:0070062(extracellular exosome);GO:0043209(myelin sheath);GO:0031982(vesicle);GO:0031012(extracellular matrix);GO:0005929(cilium);GO:0005829(cytosol);GO:0005739(mitochondrion);GO:0005737(cytoplasm);GO:0005634(nucleus);GO:0032869(cellular response to insulin stimulus);GO:0016310(phosphorylation);GO:0012501(programmed cell death);GO:0006096(glycolytic process);GO…	01200(Carbon metabolism);01230(Biosynthesis of amino acids);00010(Glycolysis / Gluconeogenesis);00620(Pyruvate metabolism);00230(Purine metabolism);04922(Glucagon signaling pathway);05230(Central carbon metabolism in cancer);05203(Viral carcinogenesis);04930(Type II diabetes mellitus)	ssc-miR-22-3p	m8	-0.186	68	147	-19.27
ciRNA183	chr7	65565442	65566131	+	1	ciRNA	-	ENSSSCT00000002159	PKM	mRNA	chr7:65565441-65566155	pyruvate kinase, muscle [Source:HGNC Symbol;Acc:HGNC:9021]	GO:1903561(extracellular vesicle);GO:0070062(extracellular exosome);GO:0043209(myelin sheath);GO:0031982(vesicle);GO:0031012(extracellular matrix);GO:0005929(cilium);GO:0005829(cytosol);GO:0005739(mitochondrion);GO:0005737(cytoplasm);GO:0005634(nucleus);GO:0032869(cellular response to insulin stimulus);GO:0016310(phosphorylation);GO:0012501(programmed cell death);GO:0006096(glycolytic process);GO…	01200(Carbon metabolism);01230(Biosynthesis of amino acids);00010(Glycolysis / Gluconeogenesis);00620(Pyruvate metabolism);00230(Purine metabolism);04922(Glucagon signaling pathway);05230(Central carbon metabolism in cancer);05203(Viral carcinogenesis);04930(Type II diabetes mellitus)	ssc-miR-221-5p	m8	-0.229	78	161	-19.36
ciRNA183	chr7	65565442	65566131	+	1	ciRNA	-	ENSSSCT00000002159	PKM	mRNA	chr7:65565441-65566155	pyruvate kinase, muscle [Source:HGNC Symbol;Acc:HGNC:9021]	GO:1903561(extracellular vesicle);GO:0070062(extracellular exosome);GO:0043209(myelin sheath);GO:0031982(vesicle);GO:0031012(extracellular matrix);GO:0005929(cilium);GO:0005829(cytosol);GO:0005739(mitochondrion);GO:0005737(cytoplasm);GO:0005634(nucleus);GO:0032869(cellular response to insulin stimulus);GO:0016310(phosphorylation);GO:0012501(programmed cell death);GO:0006096(glycolytic process);GO…	01200(Carbon metabolism);01230(Biosynthesis of amino acids);00010(Glycolysis / Gluconeogenesis);00620(Pyruvate metabolism);00230(Purine metabolism);04922(Glucagon signaling pathway);05230(Central carbon metabolism in cancer);05203(Viral carcinogenesis);04930(Type II diabetes mellitus)	ssc-miR-361-3p	8mer	-0.34825	95	143	-20.14
ciRNA183	chr7	65565442	65566131	+	1	ciRNA	-	ENSSSCT00000002159	PKM	mRNA	chr7:65565441-65566155	pyruvate kinase, muscle [Source:HGNC Symbol;Acc:HGNC:9021]	GO:1903561(extracellular vesicle);GO:0070062(extracellular exosome);GO:0043209(myelin sheath);GO:0031982(vesicle);GO:0031012(extracellular matrix);GO:0005929(cilium);GO:0005829(cytosol);GO:0005739(mitochondrion);GO:0005737(cytoplasm);GO:0005634(nucleus);GO:0032869(cellular response to insulin stimulus);GO:0016310(phosphorylation);GO:0012501(programmed cell death);GO:0006096(glycolytic process);GO…	01200(Carbon metabolism);01230(Biosynthesis of amino acids);00010(Glycolysis / Gluconeogenesis);00620(Pyruvate metabolism);00230(Purine metabolism);04922(Glucagon signaling pathway);05230(Central carbon metabolism in cancer);05203(Viral carcinogenesis);04930(Type II diabetes mellitus)	ssc-miR-490	8mer	-0.2972	89	142	-14.69
ciRNA183	chr7	65565442	65566131	+	1	ciRNA	-	ENSSSCT00000002159	PKM	mRNA	chr7:65565441-65566155	pyruvate kinase, muscle [Source:HGNC Symbol;Acc:HGNC:9021]	GO:1903561(extracellular vesicle);GO:0070062(extracellular exosome);GO:0043209(myelin sheath);GO:0031982(vesicle);GO:0031012(extracellular matrix);GO:0005929(cilium);GO:0005829(cytosol);GO:0005739(mitochondrion);GO:0005737(cytoplasm);GO:0005634(nucleus);GO:0032869(cellular response to insulin stimulus);GO:0016310(phosphorylation);GO:0012501(programmed cell death);GO:0006096(glycolytic process);GO…	01200(Carbon metabolism);01230(Biosynthesis of amino acids);00010(Glycolysis / Gluconeogenesis);00620(Pyruvate metabolism);00230(Purine metabolism);04922(Glucagon signaling pathway);05230(Central carbon metabolism in cancer);05203(Viral carcinogenesis);04930(Type II diabetes mellitus)	ssc-miR-490-3p	8mer	-0.2972	89	142	-14.69
ciRNA183	chr7	65565442	65566131	+	1	ciRNA	-	ENSSSCT00000002159	PKM	mRNA	chr7:65565441-65566155	pyruvate kinase, muscle [Source:HGNC Symbol;Acc:HGNC:9021]	GO:1903561(extracellular vesicle);GO:0070062(extracellular exosome);GO:0043209(myelin sheath);GO:0031982(vesicle);GO:0031012(extracellular matrix);GO:0005929(cilium);GO:0005829(cytosol);GO:0005739(mitochondrion);GO:0005737(cytoplasm);GO:0005634(nucleus);GO:0032869(cellular response to insulin stimulus);GO:0016310(phosphorylation);GO:0012501(programmed cell death);GO:0006096(glycolytic process);GO…	01200(Carbon metabolism);01230(Biosynthesis of amino acids);00010(Glycolysis / Gluconeogenesis);00620(Pyruvate metabolism);00230(Purine metabolism);04922(Glucagon signaling pathway);05230(Central carbon metabolism in cancer);05203(Viral carcinogenesis);04930(Type II diabetes mellitus)	ssc-miR-490-5p	m8	-0.1965	76	142	-13
ciRNA183	chr7	65565442	65566131	+	1	ciRNA	-	ENSSSCT00000002159	PKM	mRNA	chr7:65565441-65566155	pyruvate kinase, muscle [Source:HGNC Symbol;Acc:HGNC:9021]	GO:1903561(extracellular vesicle);GO:0070062(extracellular exosome);GO:0043209(myelin sheath);GO:0031982(vesicle);GO:0031012(extracellular matrix);GO:0005929(cilium);GO:0005829(cytosol);GO:0005739(mitochondrion);GO:0005737(cytoplasm);GO:0005634(nucleus);GO:0032869(cellular response to insulin stimulus);GO:0016310(phosphorylation);GO:0012501(programmed cell death);GO:0006096(glycolytic process);GO…	01200(Carbon metabolism);01230(Biosynthesis of amino acids);00010(Glycolysis / Gluconeogenesis);00620(Pyruvate metabolism);00230(Purine metabolism);04922(Glucagon signaling pathway);05230(Central carbon metabolism in cancer);05203(Viral carcinogenesis);04930(Type II diabetes mellitus)	ssc-miR-9788-3p	m8	-0.197	76	142	-16.85
ciRNA183	chr7	65565442	65566131	+	1	ciRNA	-	ENSSSCT00000002159	PKM	mRNA	chr7:65565441-65566155	pyruvate kinase, muscle [Source:HGNC Symbol;Acc:HGNC:9021]	GO:1903561(extracellular vesicle);GO:0070062(extracellular exosome);GO:0043209(myelin sheath);GO:0031982(vesicle);GO:0031012(extracellular matrix);GO:0005929(cilium);GO:0005829(cytosol);GO:0005739(mitochondrion);GO:0005737(cytoplasm);GO:0005634(nucleus);GO:0032869(cellular response to insulin stimulus);GO:0016310(phosphorylation);GO:0012501(programmed cell death);GO:0006096(glycolytic process);GO…	01200(Carbon metabolism);01230(Biosynthesis of amino acids);00010(Glycolysis / Gluconeogenesis);00620(Pyruvate metabolism);00230(Purine metabolism);04922(Glucagon signaling pathway);05230(Central carbon metabolism in cancer);05203(Viral carcinogenesis);04930(Type II diabetes mellitus)	ssc-miR-9858-5p	8mer	-0.38325	93	146	-18.73
ciRNA184	chr6	4217613	4218077	-	1	ciRNA	-	ENSSSCT00000002958	ZDHHC7	mRNA	chr6:4217588-4218077	zinc finger DHHC-type containing 7 [Source:HGNC Symbol;Acc:HGNC:18459]	GO:0016021(integral component of membrane);GO:0016020(membrane);GO:0005794(Golgi apparatus);GO:0018345(protein palmitoylation);GO:0018230(peptidyl-L-cysteine S-palmitoylation);GO:0019706(protein-cysteine S-palmitoyltransferase activity);GO:0016746(transferase activity, transferring acyl groups);GO:0016740(transferase activity);GO:0016409(palmitoyltransferase activity);GO:0008270(zinc ion binding)	NA	ssc-miR-2320-5p	8mer	-0.2354	80	153	-26.2
ciRNA184	chr6	4217613	4218077	-	1	ciRNA	-	ENSSSCT00000002958	ZDHHC7	mRNA	chr6:4217588-4218077	zinc finger DHHC-type containing 7 [Source:HGNC Symbol;Acc:HGNC:18459]	GO:0016021(integral component of membrane);GO:0016020(membrane);GO:0005794(Golgi apparatus);GO:0018345(protein palmitoylation);GO:0018230(peptidyl-L-cysteine S-palmitoylation);GO:0019706(protein-cysteine S-palmitoyltransferase activity);GO:0016746(transferase activity, transferring acyl groups);GO:0016740(transferase activity);GO:0016409(palmitoyltransferase activity);GO:0008270(zinc ion binding)	NA	ssc-miR-744	8mer	-0.2512	94	145	-25.51
ciRNA184	chr6	4217613	4218077	-	1	ciRNA	-	ENSSSCT00000002958	ZDHHC7	mRNA	chr6:4217588-4218077	zinc finger DHHC-type containing 7 [Source:HGNC Symbol;Acc:HGNC:18459]	GO:0016021(integral component of membrane);GO:0016020(membrane);GO:0005794(Golgi apparatus);GO:0018345(protein palmitoylation);GO:0018230(peptidyl-L-cysteine S-palmitoylation);GO:0019706(protein-cysteine S-palmitoyltransferase activity);GO:0016746(transferase activity, transferring acyl groups);GO:0016740(transferase activity);GO:0016409(palmitoyltransferase activity);GO:0008270(zinc ion binding)	NA	ssc-miR-9851-3p	m8	-0.148	55	146	-25.27
ciRNA185	chr6	18440544	18440726	+	1	ciRNA	-	ENSSSCT00000003099	CNOT1	mRNA	chr6:18440543-18440767	CCR4-NOT transcription complex subunit 1 [Source:HGNC Symbol;Acc:HGNC:7877]	GO:0030015(CCR4-NOT core complex);GO:0030014(CCR4-NOT complex);GO:0016020(membrane);GO:0005829(cytosol);GO:0005615(extracellular space);GO:0000932(P-body);GO:2000036(regulation of stem cell population maintenance);GO:1900153(positive regulation of nuclear-transcribed mRNA catabolic process, deadenylation-dependent decay);GO:0090503(RNA phosphodiester bond hydrolysis, exonucleolytic);GO:0061014(po…	03018(RNA degradation)	ssc-miR-7139-5p	m8	-0.2305	74	146	-12.02
ciRNA186	chr6	26420926	26421204	+	1	ciRNA	-	ENSSSCT00000029059	MT2A	mRNA	chr6:26420925-26421204	metallothionein 2A [Source:HGNC Symbol;Acc:HGNC:7406]	GO:0048471(perinuclear region of cytoplasm);GO:0005737(cytoplasm);GO:0005634(nucleus);GO:0071294(cellular response to zinc ion);GO:0045926(negative regulation of growth);GO:0036018(cellular response to erythropoietin);GO:0036016(cellular response to interleukin-3);GO:0035690(cellular response to drug);GO:0046872(metal ion binding);GO:0008270(zinc ion binding);GO:0008144(drug binding)	04978(Mineral absorption)	ssc-miR-1296-3p	m8	-0.251	92	141	-14.53
ciRNA186	chr6	26420926	26421204	+	1	ciRNA	-	ENSSSCT00000029059	MT2A	mRNA	chr6:26420925-26421204	metallothionein 2A [Source:HGNC Symbol;Acc:HGNC:7406]	GO:0048471(perinuclear region of cytoplasm);GO:0005737(cytoplasm);GO:0005634(nucleus);GO:0071294(cellular response to zinc ion);GO:0045926(negative regulation of growth);GO:0036018(cellular response to erythropoietin);GO:0036016(cellular response to interleukin-3);GO:0035690(cellular response to drug);GO:0046872(metal ion binding);GO:0008270(zinc ion binding);GO:0008144(drug binding)	04978(Mineral absorption)	ssc-miR-345-3p	m8	-0.195	80	147	-24.98
ciRNA186	chr6	26420926	26421204	+	1	ciRNA	-	ENSSSCT00000029059	MT2A	mRNA	chr6:26420925-26421204	metallothionein 2A [Source:HGNC Symbol;Acc:HGNC:7406]	GO:0048471(perinuclear region of cytoplasm);GO:0005737(cytoplasm);GO:0005634(nucleus);GO:0071294(cellular response to zinc ion);GO:0045926(negative regulation of growth);GO:0036018(cellular response to erythropoietin);GO:0036016(cellular response to interleukin-3);GO:0035690(cellular response to drug);GO:0046872(metal ion binding);GO:0008270(zinc ion binding);GO:0008144(drug binding)	04978(Mineral absorption)	ssc-miR-4334-5p	m8	-0.1265	56	151	-30.32
ciRNA186	chr6	26420926	26421204	+	1	ciRNA	-	ENSSSCT00000029059	MT2A	mRNA	chr6:26420925-26421204	metallothionein 2A [Source:HGNC Symbol;Acc:HGNC:7406]	GO:0048471(perinuclear region of cytoplasm);GO:0005737(cytoplasm);GO:0005634(nucleus);GO:0071294(cellular response to zinc ion);GO:0045926(negative regulation of growth);GO:0036018(cellular response to erythropoietin);GO:0036016(cellular response to interleukin-3);GO:0035690(cellular response to drug);GO:0046872(metal ion binding);GO:0008270(zinc ion binding);GO:0008144(drug binding)	04978(Mineral absorption)	ssc-miR-491	m8	-0.185	68	140	-17.14
ciRNA186	chr6	26420926	26421204	+	1	ciRNA	-	ENSSSCT00000029059	MT2A	mRNA	chr6:26420925-26421204	metallothionein 2A [Source:HGNC Symbol;Acc:HGNC:7406]	GO:0048471(perinuclear region of cytoplasm);GO:0005737(cytoplasm);GO:0005634(nucleus);GO:0071294(cellular response to zinc ion);GO:0045926(negative regulation of growth);GO:0036018(cellular response to erythropoietin);GO:0036016(cellular response to interleukin-3);GO:0035690(cellular response to drug);GO:0046872(metal ion binding);GO:0008270(zinc ion binding);GO:0008144(drug binding)	04978(Mineral absorption)	ssc-miR-769-3p	m8	-0.167	69	148	-21.02
ciRNA186	chr6	26420926	26421204	+	1	ciRNA	-	ENSSSCT00000029059	MT2A	mRNA	chr6:26420925-26421204	metallothionein 2A [Source:HGNC Symbol;Acc:HGNC:7406]	GO:0048471(perinuclear region of cytoplasm);GO:0005737(cytoplasm);GO:0005634(nucleus);GO:0071294(cellular response to zinc ion);GO:0045926(negative regulation of growth);GO:0036018(cellular response to erythropoietin);GO:0036016(cellular response to interleukin-3);GO:0035690(cellular response to drug);GO:0046872(metal ion binding);GO:0008270(zinc ion binding);GO:0008144(drug binding)	04978(Mineral absorption)	ssc-miR-9787-3p	m8	-0.133	55	151	-15.43
ciRNA186	chr6	26420926	26421204	+	1	ciRNA	-	ENSSSCT00000029059	MT2A	mRNA	chr6:26420925-26421204	metallothionein 2A [Source:HGNC Symbol;Acc:HGNC:7406]	GO:0048471(perinuclear region of cytoplasm);GO:0005737(cytoplasm);GO:0005634(nucleus);GO:0071294(cellular response to zinc ion);GO:0045926(negative regulation of growth);GO:0036018(cellular response to erythropoietin);GO:0036016(cellular response to interleukin-3);GO:0035690(cellular response to drug);GO:0046872(metal ion binding);GO:0008270(zinc ion binding);GO:0008144(drug binding)	04978(Mineral absorption)	ssc-miR-9799-3p	m8	-0.1625	51	145	-12.77
ciRNA186	chr6	26420926	26421204	+	1	ciRNA	-	ENSSSCT00000029059	MT2A	mRNA	chr6:26420925-26421204	metallothionein 2A [Source:HGNC Symbol;Acc:HGNC:7406]	GO:0048471(perinuclear region of cytoplasm);GO:0005737(cytoplasm);GO:0005634(nucleus);GO:0071294(cellular response to zinc ion);GO:0045926(negative regulation of growth);GO:0036018(cellular response to erythropoietin);GO:0036016(cellular response to interleukin-3);GO:0035690(cellular response to drug);GO:0046872(metal ion binding);GO:0008270(zinc ion binding);GO:0008144(drug binding)	04978(Mineral absorption)	ssc-miR-9842-5p	m8	-0.182	72	143	-18.63
ciRNA186	chr6	26420926	26421204	+	1	ciRNA	-	ENSSSCT00000029059	MT2A	mRNA	chr6:26420925-26421204	metallothionein 2A [Source:HGNC Symbol;Acc:HGNC:7406]	GO:0048471(perinuclear region of cytoplasm);GO:0005737(cytoplasm);GO:0005634(nucleus);GO:0071294(cellular response to zinc ion);GO:0045926(negative regulation of growth);GO:0036018(cellular response to erythropoietin);GO:0036016(cellular response to interleukin-3);GO:0035690(cellular response to drug);GO:0046872(metal ion binding);GO:0008270(zinc ion binding);GO:0008144(drug binding)	04978(Mineral absorption)	ssc-miR-9852-3p	8mer	-0.3802	98	140	-22.24
ciRNA187	chr6	47217616	47217902	+	1	ciRNA	-	ENSSSCT00000003429	NECTIN2	mRNA	chr6:47217615-47227821	nectin cell adhesion molecule 2 [Source:HGNC Symbol;Acc:HGNC:9707]	GO:0016021(integral component of membrane);GO:0016020(membrane);GO:0005911(cell-cell junction);GO:0046718(viral entry into host cell);GO:0007286(spermatid development);GO:0007155(cell adhesion);GO:0050839(cell adhesion molecule binding);GO:0046982(protein heterodimerization activity);GO:0042803(protein homodimerization activity);GO:0070062(extracellular exosome);GO:0044291(cell-cell contact zone)…	04514(Cell adhesion molecules (CAMs));04520(Adherens junction);05168(Herpes simplex infection)	ssc-miR-149	8mer	-0.2032	79	176	-31.95
ciRNA187	chr6	47217616	47217902	+	1	ciRNA	-	ENSSSCT00000003429	NECTIN2	mRNA	chr6:47217615-47227821	nectin cell adhesion molecule 2 [Source:HGNC Symbol;Acc:HGNC:9707]	GO:0016021(integral component of membrane);GO:0016020(membrane);GO:0005911(cell-cell junction);GO:0046718(viral entry into host cell);GO:0007286(spermatid development);GO:0007155(cell adhesion);GO:0050839(cell adhesion molecule binding);GO:0046982(protein heterodimerization activity);GO:0042803(protein homodimerization activity);GO:0070062(extracellular exosome);GO:0044291(cell-cell contact zone)…	04514(Cell adhesion molecules (CAMs));04520(Adherens junction);05168(Herpes simplex infection)	ssc-miR-328	8mer	-0.27935	93	146	-22.45
ciRNA187	chr6	47217616	47217902	+	1	ciRNA	-	ENSSSCT00000003429	NECTIN2	mRNA	chr6:47217615-47227821	nectin cell adhesion molecule 2 [Source:HGNC Symbol;Acc:HGNC:9707]	GO:0016021(integral component of membrane);GO:0016020(membrane);GO:0005911(cell-cell junction);GO:0046718(viral entry into host cell);GO:0007286(spermatid development);GO:0007155(cell adhesion);GO:0050839(cell adhesion molecule binding);GO:0046982(protein heterodimerization activity);GO:0042803(protein homodimerization activity);GO:0070062(extracellular exosome);GO:0044291(cell-cell contact zone)…	04514(Cell adhesion molecules (CAMs));04520(Adherens junction);05168(Herpes simplex infection)	ssc-miR-361-3p	8mer	-0.2942	90	157	-25.43
ciRNA188	chr6	52416041	52416292	-	1	ciRNA	-	ENSSSCT00000003610	ENSSSCG00000003250	mRNA	chr6:52416019-52416292	NA	GO:0016021(integral component of membrane);GO:0016020(membrane);GO:0006865(amino acid transport);GO:0003333(amino acid transmembrane transport);GO:0015171(amino acid transmembrane transporter activity)	NA	ssc-miR-296-5p	m8	-0.1515	70	142	-14.64
ciRNA188	chr6	52416041	52416292	-	1	ciRNA	-	ENSSSCT00000003610	ENSSSCG00000003250	mRNA	chr6:52416019-52416292	NA	GO:0016021(integral component of membrane);GO:0016020(membrane);GO:0006865(amino acid transport);GO:0003333(amino acid transmembrane transport);GO:0015171(amino acid transmembrane transporter activity)	NA	ssc-miR-345-3p	m8	-0.132	52	150	-22.38
ciRNA188	chr6	52416041	52416292	-	1	ciRNA	-	ENSSSCT00000003610	ENSSSCG00000003250	mRNA	chr6:52416019-52416292	NA	GO:0016021(integral component of membrane);GO:0016020(membrane);GO:0006865(amino acid transport);GO:0003333(amino acid transmembrane transport);GO:0015171(amino acid transmembrane transporter activity)	NA	ssc-miR-9845-5p	m8	-0.1695	67	162	-26.98
ciRNA189	chr5	23614832	23615314	-	1	ciRNA	-	ENSSSCT00000032195	BAZ2A	mRNA	chr5:23614688-23615314	bromodomain adjacent to zinc finger domain 2A [Source:HGNC Symbol;Acc:HGNC:962]	GO:0016607(nuclear speck);GO:0005829(cytosol);GO:0005634(nucleus);GO:0046872(metal ion binding);GO:0042393(histone binding);GO:0008270(zinc ion binding);GO:0003677(DNA binding);GO:0001164(RNA polymerase I CORE element sequence-specific DNA binding)	NA	ssc-miR-133a-5p	m8	-0.234	83	162	-19.49
ciRNA189	chr5	23614832	23615314	-	1	ciRNA	-	ENSSSCT00000032195	BAZ2A	mRNA	chr5:23614688-23615314	bromodomain adjacent to zinc finger domain 2A [Source:HGNC Symbol;Acc:HGNC:962]	GO:0016607(nuclear speck);GO:0005829(cytosol);GO:0005634(nucleus);GO:0046872(metal ion binding);GO:0042393(histone binding);GO:0008270(zinc ion binding);GO:0003677(DNA binding);GO:0001164(RNA polymerase I CORE element sequence-specific DNA binding)	NA	ssc-miR-136	m8	-0.351	91	157	-15.49
ciRNA189	chr5	23614832	23615314	-	1	ciRNA	-	ENSSSCT00000032195	BAZ2A	mRNA	chr5:23614688-23615314	bromodomain adjacent to zinc finger domain 2A [Source:HGNC Symbol;Acc:HGNC:962]	GO:0016607(nuclear speck);GO:0005829(cytosol);GO:0005634(nucleus);GO:0046872(metal ion binding);GO:0042393(histone binding);GO:0008270(zinc ion binding);GO:0003677(DNA binding);GO:0001164(RNA polymerase I CORE element sequence-specific DNA binding)	NA	ssc-miR-142-5p	m8	-0.201	68	156	-13.33
ciRNA189	chr5	23614832	23615314	-	1	ciRNA	-	ENSSSCT00000032195	BAZ2A	mRNA	chr5:23614688-23615314	bromodomain adjacent to zinc finger domain 2A [Source:HGNC Symbol;Acc:HGNC:962]	GO:0016607(nuclear speck);GO:0005829(cytosol);GO:0005634(nucleus);GO:0046872(metal ion binding);GO:0042393(histone binding);GO:0008270(zinc ion binding);GO:0003677(DNA binding);GO:0001164(RNA polymerase I CORE element sequence-specific DNA binding)	NA	ssc-miR-153	m8	-0.266	85	144	-11.15
ciRNA189	chr5	23614832	23615314	-	1	ciRNA	-	ENSSSCT00000032195	BAZ2A	mRNA	chr5:23614688-23615314	bromodomain adjacent to zinc finger domain 2A [Source:HGNC Symbol;Acc:HGNC:962]	GO:0016607(nuclear speck);GO:0005829(cytosol);GO:0005634(nucleus);GO:0046872(metal ion binding);GO:0042393(histone binding);GO:0008270(zinc ion binding);GO:0003677(DNA binding);GO:0001164(RNA polymerase I CORE element sequence-specific DNA binding)	NA	ssc-miR-421-3p	m8	-0.185	65	151	-13.78
ciRNA189	chr5	23614832	23615314	-	1	ciRNA	-	ENSSSCT00000032195	BAZ2A	mRNA	chr5:23614688-23615314	bromodomain adjacent to zinc finger domain 2A [Source:HGNC Symbol;Acc:HGNC:962]	GO:0016607(nuclear speck);GO:0005829(cytosol);GO:0005634(nucleus);GO:0046872(metal ion binding);GO:0042393(histone binding);GO:0008270(zinc ion binding);GO:0003677(DNA binding);GO:0001164(RNA polymerase I CORE element sequence-specific DNA binding)	NA	ssc-miR-9789-3p	m8	-0.266	84	147	-13.51
ciRNA189	chr5	23614832	23615314	-	1	ciRNA	-	ENSSSCT00000032195	BAZ2A	mRNA	chr5:23614688-23615314	bromodomain adjacent to zinc finger domain 2A [Source:HGNC Symbol;Acc:HGNC:962]	GO:0016607(nuclear speck);GO:0005829(cytosol);GO:0005634(nucleus);GO:0046872(metal ion binding);GO:0042393(histone binding);GO:0008270(zinc ion binding);GO:0003677(DNA binding);GO:0001164(RNA polymerase I CORE element sequence-specific DNA binding)	NA	ssc-miR-9801-5p	m8	-0.1755	61	141	-10.24
ciRNA189	chr5	23614832	23615314	-	1	ciRNA	-	ENSSSCT00000032195	BAZ2A	mRNA	chr5:23614688-23615314	bromodomain adjacent to zinc finger domain 2A [Source:HGNC Symbol;Acc:HGNC:962]	GO:0016607(nuclear speck);GO:0005829(cytosol);GO:0005634(nucleus);GO:0046872(metal ion binding);GO:0042393(histone binding);GO:0008270(zinc ion binding);GO:0003677(DNA binding);GO:0001164(RNA polymerase I CORE element sequence-specific DNA binding)	NA	ssc-miR-9820-5p	m8	-0.376	97	163	-22.25
ciRNA189	chr5	23614832	23615314	-	1	ciRNA	-	ENSSSCT00000032195	BAZ2A	mRNA	chr5:23614688-23615314	bromodomain adjacent to zinc finger domain 2A [Source:HGNC Symbol;Acc:HGNC:962]	GO:0016607(nuclear speck);GO:0005829(cytosol);GO:0005634(nucleus);GO:0046872(metal ion binding);GO:0042393(histone binding);GO:0008270(zinc ion binding);GO:0003677(DNA binding);GO:0001164(RNA polymerase I CORE element sequence-specific DNA binding)	NA	ssc-miR-9859-3p	m8	-0.2485	82	152	-12.02
ciRNA19	chr12	1163312	1163659	+	1	ciRNA	-	ENSSSCT00000025260	ACTG1	mRNA	chr12:1163311-1163686	actin gamma 1 [Source:HGNC Symbol;Acc:HGNC:144]	GO:0097433(dense body);GO:0072562(blood microparticle);GO:0070062(extracellular exosome);GO:0043209(myelin sheath);GO:0031941(filamentous actin);GO:0031012(extracellular matrix);GO:0030016(myofibril);GO:0016020(membrane);GO:0015629(actin cytoskeleton);GO:0005925(focal adhesion);GO:0005886(plasma membrane);GO:0005856(cytoskeleton);GO:0005634(nucleus);GO:0005615(extracellular space);GO:0070527(plat…	04015(Rap1 signaling pathway);04390(Hippo signaling pathway);04145(Phagosome);04810(Regulation of actin cytoskeleton);04510(Focal adhesion);04520(Adherens junction);04530(Tight junction);04611(Platelet activation);04670(Leukocyte transendothelial migration);04921(Oxytocin signaling pathway);04919(Thyroid hormone signaling pathway);05205(Proteoglycans in cancer);05410(Hypertrophic cardiomyopathy (…	ssc-miR-9824-5p	8mer	-0.1922	76	153	-24.23
ciRNA190	chr5	23664661	23664881	-	1	ciRNA	-	ENSSSCT00000033906	ATP5B	mRNA	chr5:23664610-23664881	ATP synthase, H+ transporting, mitochondrial F1 complex, beta polypeptide [Source:HGNC Symbol;Acc:HGNC:830]	GO:0045261(proton-transporting ATP synthase complex, catalytic core F(1));GO:0099132(ATP hydrolysis coupled cation transmembrane transport);GO:0046034(ATP metabolic process);GO:0015992(proton transport);GO:0015986(ATP synthesis coupled proton transport);GO:0006754(ATP biosynthetic process);GO:0046933(proton-transporting ATP synthase activity, rotational mechanism);GO:0005524(ATP binding);GO:00001…	00190(Oxidative phosphorylation);05010(Alzheimer's disease);05012(Parkinson's disease);05016(Huntington's disease)	ssc-miR-371-5p	8mer	-0.47115	98	143	-14.24
ciRNA191	chr4	103701956	103702336	+	1	ciRNA	-	ENSSSCT00000007166	KCNN3	mRNA	chr4:103701955-103752545	potassium calcium-activated channel subfamily N member 3 [Source:HGNC Symbol;Acc:HGNC:6292]	GO:0016021(integral component of membrane);GO:0016020(membrane);GO:0005886(plasma membrane);GO:0005737(cytoplasm);GO:0071805(potassium ion transmembrane transport);GO:0006813(potassium ion transport);GO:0016286(small conductance calcium-activated potassium channel activity);GO:0015269(calcium-activated potassium channel activity);GO:0005516(calmodulin binding)	NA	ssc-miR-155-3p	m8	-0.257	83	150	-13.42
ciRNA191	chr4	103701956	103702336	+	1	ciRNA	-	ENSSSCT00000007166	KCNN3	mRNA	chr4:103701955-103752545	potassium calcium-activated channel subfamily N member 3 [Source:HGNC Symbol;Acc:HGNC:6292]	GO:0016021(integral component of membrane);GO:0016020(membrane);GO:0005886(plasma membrane);GO:0005737(cytoplasm);GO:0071805(potassium ion transmembrane transport);GO:0006813(potassium ion transport);GO:0016286(small conductance calcium-activated potassium channel activity);GO:0015269(calcium-activated potassium channel activity);GO:0005516(calmodulin binding)	NA	ssc-miR-340	m8	-0.159	55	154	-14.19
ciRNA191	chr4	103701956	103702336	+	1	ciRNA	-	ENSSSCT00000007166	KCNN3	mRNA	chr4:103701955-103752545	potassium calcium-activated channel subfamily N member 3 [Source:HGNC Symbol;Acc:HGNC:6292]	GO:0016021(integral component of membrane);GO:0016020(membrane);GO:0005886(plasma membrane);GO:0005737(cytoplasm);GO:0071805(potassium ion transmembrane transport);GO:0006813(potassium ion transport);GO:0016286(small conductance calcium-activated potassium channel activity);GO:0015269(calcium-activated potassium channel activity);GO:0005516(calmodulin binding)	NA	ssc-miR-532-5p	8mer	-0.45925	98	153	-15.74
ciRNA191	chr4	103701956	103702336	+	1	ciRNA	-	ENSSSCT00000007166	KCNN3	mRNA	chr4:103701955-103752545	potassium calcium-activated channel subfamily N member 3 [Source:HGNC Symbol;Acc:HGNC:6292]	GO:0016021(integral component of membrane);GO:0016020(membrane);GO:0005886(plasma membrane);GO:0005737(cytoplasm);GO:0071805(potassium ion transmembrane transport);GO:0006813(potassium ion transport);GO:0016286(small conductance calcium-activated potassium channel activity);GO:0015269(calcium-activated potassium channel activity);GO:0005516(calmodulin binding)	NA	ssc-miR-9786-3p	8mer	-0.2583	83	140	-12.53
ciRNA191	chr4	103701956	103702336	+	1	ciRNA	-	ENSSSCT00000007166	KCNN3	mRNA	chr4:103701955-103752545	potassium calcium-activated channel subfamily N member 3 [Source:HGNC Symbol;Acc:HGNC:6292]	GO:0016021(integral component of membrane);GO:0016020(membrane);GO:0005886(plasma membrane);GO:0005737(cytoplasm);GO:0071805(potassium ion transmembrane transport);GO:0006813(potassium ion transport);GO:0016286(small conductance calcium-activated potassium channel activity);GO:0015269(calcium-activated potassium channel activity);GO:0005516(calmodulin binding)	NA	ssc-miR-9804-5p	m8	-0.2705	87	153	-21.26
ciRNA192	chr4	116705836	116706128	-	1	ciRNA	-	ENSSSCT00000007404	OLFML3	mRNA	chr4:116705804-116706128	olfactomedin like 3 [Source:HGNC Symbol;Acc:HGNC:24956]	GO:1903561(extracellular vesicle);GO:0055114(oxidation-reduction process);GO:0006086(acetyl-CoA biosynthetic process from pyruvate);GO:0019164(pyruvate synthase activity);GO:0016491(oxidoreductase activity)	NA	ssc-miR-140-3p	m8	-0.2135	83	148	-23.22
ciRNA193	chr4	121299446	121299769	-	1	ciRNA	-	ENSSSCT00000007483	PSRC1	mRNA	chr4:121299416-121299769	proline and serine rich coiled-coil 1 [Source:HGNC Symbol;Acc:HGNC:24472]	GO:0030496(midbody);GO:0015630(microtubule cytoskeleton);GO:0005876(spindle microtubule);GO:0005829(cytosol);GO:0005819(spindle);GO:0005737(cytoplasm);GO:0005654(nucleoplasm);GO:0000922(spindle pole);GO:0060236(regulation of mitotic spindle organization);GO:0045893(positive regulation of transcription, DNA-templated);GO:0045737(positive regulation of cyclin-dependent protein serine/threonine kina…	NA	ssc-let-7a	8mer	-0.50625	99	150	-14.75
ciRNA193	chr4	121299446	121299769	-	1	ciRNA	-	ENSSSCT00000007483	PSRC1	mRNA	chr4:121299416-121299769	proline and serine rich coiled-coil 1 [Source:HGNC Symbol;Acc:HGNC:24472]	GO:0030496(midbody);GO:0015630(microtubule cytoskeleton);GO:0005876(spindle microtubule);GO:0005829(cytosol);GO:0005819(spindle);GO:0005737(cytoplasm);GO:0005654(nucleoplasm);GO:0000922(spindle pole);GO:0060236(regulation of mitotic spindle organization);GO:0045893(positive regulation of transcription, DNA-templated);GO:0045737(positive regulation of cyclin-dependent protein serine/threonine kina…	NA	ssc-let-7c	8mer	-0.50625	99	150	-15.18
ciRNA193	chr4	121299446	121299769	-	1	ciRNA	-	ENSSSCT00000007483	PSRC1	mRNA	chr4:121299416-121299769	proline and serine rich coiled-coil 1 [Source:HGNC Symbol;Acc:HGNC:24472]	GO:0030496(midbody);GO:0015630(microtubule cytoskeleton);GO:0005876(spindle microtubule);GO:0005829(cytosol);GO:0005819(spindle);GO:0005737(cytoplasm);GO:0005654(nucleoplasm);GO:0000922(spindle pole);GO:0060236(regulation of mitotic spindle organization);GO:0045893(positive regulation of transcription, DNA-templated);GO:0045737(positive regulation of cyclin-dependent protein serine/threonine kina…	NA	ssc-let-7d-5p	8mer	-0.5042	99	154	-13.58
ciRNA193	chr4	121299446	121299769	-	1	ciRNA	-	ENSSSCT00000007483	PSRC1	mRNA	chr4:121299416-121299769	proline and serine rich coiled-coil 1 [Source:HGNC Symbol;Acc:HGNC:24472]	GO:0030496(midbody);GO:0015630(microtubule cytoskeleton);GO:0005876(spindle microtubule);GO:0005829(cytosol);GO:0005819(spindle);GO:0005737(cytoplasm);GO:0005654(nucleoplasm);GO:0000922(spindle pole);GO:0060236(regulation of mitotic spindle organization);GO:0045893(positive regulation of transcription, DNA-templated);GO:0045737(positive regulation of cyclin-dependent protein serine/threonine kina…	NA	ssc-let-7e	8mer	-0.50625	99	154	-16.54
ciRNA193	chr4	121299446	121299769	-	1	ciRNA	-	ENSSSCT00000007483	PSRC1	mRNA	chr4:121299416-121299769	proline and serine rich coiled-coil 1 [Source:HGNC Symbol;Acc:HGNC:24472]	GO:0030496(midbody);GO:0015630(microtubule cytoskeleton);GO:0005876(spindle microtubule);GO:0005829(cytosol);GO:0005819(spindle);GO:0005737(cytoplasm);GO:0005654(nucleoplasm);GO:0000922(spindle pole);GO:0060236(regulation of mitotic spindle organization);GO:0045893(positive regulation of transcription, DNA-templated);GO:0045737(positive regulation of cyclin-dependent protein serine/threonine kina…	NA	ssc-let-7f	8mer	-0.50625	99	144	-16.26
ciRNA193	chr4	121299446	121299769	-	1	ciRNA	-	ENSSSCT00000007483	PSRC1	mRNA	chr4:121299416-121299769	proline and serine rich coiled-coil 1 [Source:HGNC Symbol;Acc:HGNC:24472]	GO:0030496(midbody);GO:0015630(microtubule cytoskeleton);GO:0005876(spindle microtubule);GO:0005829(cytosol);GO:0005819(spindle);GO:0005737(cytoplasm);GO:0005654(nucleoplasm);GO:0000922(spindle pole);GO:0060236(regulation of mitotic spindle organization);GO:0045893(positive regulation of transcription, DNA-templated);GO:0045737(positive regulation of cyclin-dependent protein serine/threonine kina…	NA	ssc-let-7g	8mer	-0.50625	99	150	-16.74
ciRNA193	chr4	121299446	121299769	-	1	ciRNA	-	ENSSSCT00000007483	PSRC1	mRNA	chr4:121299416-121299769	proline and serine rich coiled-coil 1 [Source:HGNC Symbol;Acc:HGNC:24472]	GO:0030496(midbody);GO:0015630(microtubule cytoskeleton);GO:0005876(spindle microtubule);GO:0005829(cytosol);GO:0005819(spindle);GO:0005737(cytoplasm);GO:0005654(nucleoplasm);GO:0000922(spindle pole);GO:0060236(regulation of mitotic spindle organization);GO:0045893(positive regulation of transcription, DNA-templated);GO:0045737(positive regulation of cyclin-dependent protein serine/threonine kina…	NA	ssc-let-7i	8mer	-0.5083	99	149	-18.39
ciRNA193	chr4	121299446	121299769	-	1	ciRNA	-	ENSSSCT00000007483	PSRC1	mRNA	chr4:121299416-121299769	proline and serine rich coiled-coil 1 [Source:HGNC Symbol;Acc:HGNC:24472]	GO:0030496(midbody);GO:0015630(microtubule cytoskeleton);GO:0005876(spindle microtubule);GO:0005829(cytosol);GO:0005819(spindle);GO:0005737(cytoplasm);GO:0005654(nucleoplasm);GO:0000922(spindle pole);GO:0060236(regulation of mitotic spindle organization);GO:0045893(positive regulation of transcription, DNA-templated);GO:0045737(positive regulation of cyclin-dependent protein serine/threonine kina…	NA	ssc-miR-1839-5p	m8	-0.273	88	140	-10.22
ciRNA193	chr4	121299446	121299769	-	1	ciRNA	-	ENSSSCT00000007483	PSRC1	mRNA	chr4:121299416-121299769	proline and serine rich coiled-coil 1 [Source:HGNC Symbol;Acc:HGNC:24472]	GO:0030496(midbody);GO:0015630(microtubule cytoskeleton);GO:0005876(spindle microtubule);GO:0005829(cytosol);GO:0005819(spindle);GO:0005737(cytoplasm);GO:0005654(nucleoplasm);GO:0000922(spindle pole);GO:0060236(regulation of mitotic spindle organization);GO:0045893(positive regulation of transcription, DNA-templated);GO:0045737(positive regulation of cyclin-dependent protein serine/threonine kina…	NA	ssc-miR-21	m8	-0.2295	76	165	-17.29
ciRNA193	chr4	121299446	121299769	-	1	ciRNA	-	ENSSSCT00000007483	PSRC1	mRNA	chr4:121299416-121299769	proline and serine rich coiled-coil 1 [Source:HGNC Symbol;Acc:HGNC:24472]	GO:0030496(midbody);GO:0015630(microtubule cytoskeleton);GO:0005876(spindle microtubule);GO:0005829(cytosol);GO:0005819(spindle);GO:0005737(cytoplasm);GO:0005654(nucleoplasm);GO:0000922(spindle pole);GO:0060236(regulation of mitotic spindle organization);GO:0045893(positive regulation of transcription, DNA-templated);GO:0045737(positive regulation of cyclin-dependent protein serine/threonine kina…	NA	ssc-miR-22-3p	8mer	-0.39205	97	147	-18.64
ciRNA193	chr4	121299446	121299769	-	1	ciRNA	-	ENSSSCT00000007483	PSRC1	mRNA	chr4:121299416-121299769	proline and serine rich coiled-coil 1 [Source:HGNC Symbol;Acc:HGNC:24472]	GO:0030496(midbody);GO:0015630(microtubule cytoskeleton);GO:0005876(spindle microtubule);GO:0005829(cytosol);GO:0005819(spindle);GO:0005737(cytoplasm);GO:0005654(nucleoplasm);GO:0000922(spindle pole);GO:0060236(regulation of mitotic spindle organization);GO:0045893(positive regulation of transcription, DNA-templated);GO:0045737(positive regulation of cyclin-dependent protein serine/threonine kina…	NA	ssc-miR-27b-5p	m8	-0.2215	91	144	-15.17
ciRNA193	chr4	121299446	121299769	-	1	ciRNA	-	ENSSSCT00000007483	PSRC1	mRNA	chr4:121299416-121299769	proline and serine rich coiled-coil 1 [Source:HGNC Symbol;Acc:HGNC:24472]	GO:0030496(midbody);GO:0015630(microtubule cytoskeleton);GO:0005876(spindle microtubule);GO:0005829(cytosol);GO:0005819(spindle);GO:0005737(cytoplasm);GO:0005654(nucleoplasm);GO:0000922(spindle pole);GO:0060236(regulation of mitotic spindle organization);GO:0045893(positive regulation of transcription, DNA-templated);GO:0045737(positive regulation of cyclin-dependent protein serine/threonine kina…	NA	ssc-miR-484	m8	-0.1775	81	144	-19.16
ciRNA193	chr4	121299446	121299769	-	1	ciRNA	-	ENSSSCT00000007483	PSRC1	mRNA	chr4:121299416-121299769	proline and serine rich coiled-coil 1 [Source:HGNC Symbol;Acc:HGNC:24472]	GO:0030496(midbody);GO:0015630(microtubule cytoskeleton);GO:0005876(spindle microtubule);GO:0005829(cytosol);GO:0005819(spindle);GO:0005737(cytoplasm);GO:0005654(nucleoplasm);GO:0000922(spindle pole);GO:0060236(regulation of mitotic spindle organization);GO:0045893(positive regulation of transcription, DNA-templated);GO:0045737(positive regulation of cyclin-dependent protein serine/threonine kina…	NA	ssc-miR-486	m8	-0.218	77	160	-22.32
ciRNA193	chr4	121299446	121299769	-	1	ciRNA	-	ENSSSCT00000007483	PSRC1	mRNA	chr4:121299416-121299769	proline and serine rich coiled-coil 1 [Source:HGNC Symbol;Acc:HGNC:24472]	GO:0030496(midbody);GO:0015630(microtubule cytoskeleton);GO:0005876(spindle microtubule);GO:0005829(cytosol);GO:0005819(spindle);GO:0005737(cytoplasm);GO:0005654(nucleoplasm);GO:0000922(spindle pole);GO:0060236(regulation of mitotic spindle organization);GO:0045893(positive regulation of transcription, DNA-templated);GO:0045737(positive regulation of cyclin-dependent protein serine/threonine kina…	NA	ssc-miR-98	8mer	-0.50625	99	151	-14.95
ciRNA193	chr4	121299446	121299769	-	1	ciRNA	-	ENSSSCT00000007483	PSRC1	mRNA	chr4:121299416-121299769	proline and serine rich coiled-coil 1 [Source:HGNC Symbol;Acc:HGNC:24472]	GO:0030496(midbody);GO:0015630(microtubule cytoskeleton);GO:0005876(spindle microtubule);GO:0005829(cytosol);GO:0005819(spindle);GO:0005737(cytoplasm);GO:0005654(nucleoplasm);GO:0000922(spindle pole);GO:0060236(regulation of mitotic spindle organization);GO:0045893(positive regulation of transcription, DNA-templated);GO:0045737(positive regulation of cyclin-dependent protein serine/threonine kina…	NA	ssc-miR-9852-3p	m8	-0.257	93	158	-23.3
ciRNA194	chr3	38522514	38522714	-	1	ciRNA	-	ENSSSCT00000008685	ENSSSCG00000007924	mRNA	chr3:38522458-38522714	NA	GO:0005634(nucleus);GO:0006325(chromatin organization)	NA	ssc-miR-133a-3p	8mer	-0.17625	72	152	-26.99
ciRNA194	chr3	38522514	38522714	-	1	ciRNA	-	ENSSSCT00000008685	ENSSSCG00000007924	mRNA	chr3:38522458-38522714	NA	GO:0005634(nucleus);GO:0006325(chromatin organization)	NA	ssc-miR-30b-3p	m8	-0.1355	57	144	-16.21
ciRNA194	chr3	38522514	38522714	-	1	ciRNA	-	ENSSSCT00000008685	ENSSSCG00000007924	mRNA	chr3:38522458-38522714	NA	GO:0005634(nucleus);GO:0006325(chromatin organization)	NA	ssc-miR-361-3p	m8	-0.118	51	160	-24.65
ciRNA194	chr3	38522514	38522714	-	1	ciRNA	-	ENSSSCT00000008685	ENSSSCG00000007924	mRNA	chr3:38522458-38522714	NA	GO:0005634(nucleus);GO:0006325(chromatin organization)	NA	ssc-miR-9845-5p	m8	-0.1335	55	141	-16.59
ciRNA195	chr3	40567011	40567283	+	1	ciRNA	-	ENSSSCT00000032217	MMP25	mRNA	chr3:40567010-40567317	matrix metallopeptidase 25 [Source:HGNC Symbol;Acc:HGNC:14246]	GO:0031012(extracellular matrix);GO:0016021(integral component of membrane);GO:0005886(plasma membrane);GO:0060022(hard palate development);GO:0006954(inflammatory response);GO:0006508(proteolysis);GO:0046872(metal ion binding);GO:0016787(hydrolase activity);GO:0008270(zinc ion binding);GO:0008237(metallopeptidase activity);GO:0008233(peptidase activity);GO:0005509(calcium ion binding);GO:0004222…	NA	ssc-miR-125a	m8	-0.149	60	140	-17.7
ciRNA195	chr3	40567011	40567283	+	1	ciRNA	-	ENSSSCT00000032217	MMP25	mRNA	chr3:40567010-40567317	matrix metallopeptidase 25 [Source:HGNC Symbol;Acc:HGNC:14246]	GO:0031012(extracellular matrix);GO:0016021(integral component of membrane);GO:0005886(plasma membrane);GO:0060022(hard palate development);GO:0006954(inflammatory response);GO:0006508(proteolysis);GO:0046872(metal ion binding);GO:0016787(hydrolase activity);GO:0008270(zinc ion binding);GO:0008237(metallopeptidase activity);GO:0008233(peptidase activity);GO:0005509(calcium ion binding);GO:0004222…	NA	ssc-miR-125b	m8	-0.149	61	140	-15.31
ciRNA195	chr3	40567011	40567283	+	1	ciRNA	-	ENSSSCT00000032217	MMP25	mRNA	chr3:40567010-40567317	matrix metallopeptidase 25 [Source:HGNC Symbol;Acc:HGNC:14246]	GO:0031012(extracellular matrix);GO:0016021(integral component of membrane);GO:0005886(plasma membrane);GO:0060022(hard palate development);GO:0006954(inflammatory response);GO:0006508(proteolysis);GO:0046872(metal ion binding);GO:0016787(hydrolase activity);GO:0008270(zinc ion binding);GO:0008237(metallopeptidase activity);GO:0008233(peptidase activity);GO:0005509(calcium ion binding);GO:0004222…	NA	ssc-miR-1271	m8	-0.2375	82	153	-18.41
ciRNA195	chr3	40567011	40567283	+	1	ciRNA	-	ENSSSCT00000032217	MMP25	mRNA	chr3:40567010-40567317	matrix metallopeptidase 25 [Source:HGNC Symbol;Acc:HGNC:14246]	GO:0031012(extracellular matrix);GO:0016021(integral component of membrane);GO:0005886(plasma membrane);GO:0060022(hard palate development);GO:0006954(inflammatory response);GO:0006508(proteolysis);GO:0046872(metal ion binding);GO:0016787(hydrolase activity);GO:0008270(zinc ion binding);GO:0008237(metallopeptidase activity);GO:0008233(peptidase activity);GO:0005509(calcium ion binding);GO:0004222…	NA	ssc-miR-129a-3p	8mer	-0.3912	98	145	-17.54
ciRNA195	chr3	40567011	40567283	+	1	ciRNA	-	ENSSSCT00000032217	MMP25	mRNA	chr3:40567010-40567317	matrix metallopeptidase 25 [Source:HGNC Symbol;Acc:HGNC:14246]	GO:0031012(extracellular matrix);GO:0016021(integral component of membrane);GO:0005886(plasma membrane);GO:0060022(hard palate development);GO:0006954(inflammatory response);GO:0006508(proteolysis);GO:0046872(metal ion binding);GO:0016787(hydrolase activity);GO:0008270(zinc ion binding);GO:0008237(metallopeptidase activity);GO:0008233(peptidase activity);GO:0005509(calcium ion binding);GO:0004222…	NA	ssc-miR-324	m8	-0.1405	61	153	-24.95
ciRNA195	chr3	40567011	40567283	+	1	ciRNA	-	ENSSSCT00000032217	MMP25	mRNA	chr3:40567010-40567317	matrix metallopeptidase 25 [Source:HGNC Symbol;Acc:HGNC:14246]	GO:0031012(extracellular matrix);GO:0016021(integral component of membrane);GO:0005886(plasma membrane);GO:0060022(hard palate development);GO:0006954(inflammatory response);GO:0006508(proteolysis);GO:0046872(metal ion binding);GO:0016787(hydrolase activity);GO:0008270(zinc ion binding);GO:0008237(metallopeptidase activity);GO:0008233(peptidase activity);GO:0005509(calcium ion binding);GO:0004222…	NA	ssc-miR-326	m8	-0.1405	56	140	-16.01
ciRNA195	chr3	40567011	40567283	+	1	ciRNA	-	ENSSSCT00000032217	MMP25	mRNA	chr3:40567010-40567317	matrix metallopeptidase 25 [Source:HGNC Symbol;Acc:HGNC:14246]	GO:0031012(extracellular matrix);GO:0016021(integral component of membrane);GO:0005886(plasma membrane);GO:0060022(hard palate development);GO:0006954(inflammatory response);GO:0006508(proteolysis);GO:0046872(metal ion binding);GO:0016787(hydrolase activity);GO:0008270(zinc ion binding);GO:0008237(metallopeptidase activity);GO:0008233(peptidase activity);GO:0005509(calcium ion binding);GO:0004222…	NA	ssc-miR-671-5p	m8	-0.223	79	151	-28.64
ciRNA195	chr3	40567011	40567283	+	1	ciRNA	-	ENSSSCT00000032217	MMP25	mRNA	chr3:40567010-40567317	matrix metallopeptidase 25 [Source:HGNC Symbol;Acc:HGNC:14246]	GO:0031012(extracellular matrix);GO:0016021(integral component of membrane);GO:0005886(plasma membrane);GO:0060022(hard palate development);GO:0006954(inflammatory response);GO:0006508(proteolysis);GO:0046872(metal ion binding);GO:0016787(hydrolase activity);GO:0008270(zinc ion binding);GO:0008237(metallopeptidase activity);GO:0008233(peptidase activity);GO:0005509(calcium ion binding);GO:0004222…	NA	ssc-miR-7136-5p	m8	-0.165	57	151	-18.76
ciRNA195	chr3	40567011	40567283	+	1	ciRNA	-	ENSSSCT00000032217	MMP25	mRNA	chr3:40567010-40567317	matrix metallopeptidase 25 [Source:HGNC Symbol;Acc:HGNC:14246]	GO:0031012(extracellular matrix);GO:0016021(integral component of membrane);GO:0005886(plasma membrane);GO:0060022(hard palate development);GO:0006954(inflammatory response);GO:0006508(proteolysis);GO:0046872(metal ion binding);GO:0016787(hydrolase activity);GO:0008270(zinc ion binding);GO:0008237(metallopeptidase activity);GO:0008233(peptidase activity);GO:0005509(calcium ion binding);GO:0004222…	NA	ssc-miR-7137-3p	m8	-0.1965	72	174	-33.21
ciRNA195	chr3	40567011	40567283	+	1	ciRNA	-	ENSSSCT00000032217	MMP25	mRNA	chr3:40567010-40567317	matrix metallopeptidase 25 [Source:HGNC Symbol;Acc:HGNC:14246]	GO:0031012(extracellular matrix);GO:0016021(integral component of membrane);GO:0005886(plasma membrane);GO:0060022(hard palate development);GO:0006954(inflammatory response);GO:0006508(proteolysis);GO:0046872(metal ion binding);GO:0016787(hydrolase activity);GO:0008270(zinc ion binding);GO:0008237(metallopeptidase activity);GO:0008233(peptidase activity);GO:0005509(calcium ion binding);GO:0004222…	NA	ssc-miR-9802-3p	8mer	-0.1762	72	152	-18.57
ciRNA195	chr3	40567011	40567283	+	1	ciRNA	-	ENSSSCT00000032217	MMP25	mRNA	chr3:40567010-40567317	matrix metallopeptidase 25 [Source:HGNC Symbol;Acc:HGNC:14246]	GO:0031012(extracellular matrix);GO:0016021(integral component of membrane);GO:0005886(plasma membrane);GO:0060022(hard palate development);GO:0006954(inflammatory response);GO:0006508(proteolysis);GO:0046872(metal ion binding);GO:0016787(hydrolase activity);GO:0008270(zinc ion binding);GO:0008237(metallopeptidase activity);GO:0008233(peptidase activity);GO:0005509(calcium ion binding);GO:0004222…	NA	ssc-miR-9854-5p	8mer	-0.2091	87	140	-14.06
ciRNA196	chr3	42313196	42313459	-	1	ciRNA	-	ENSSSCT00000008812	PKD1	mRNA	chr3:42313165-42313459	polycystin 1, transient receptor potential channel interacting [Source:HGNC Symbol;Acc:HGNC:9008]	GO:0070062(extracellular exosome);GO:0031514(motile cilium);GO:0016323(basolateral plasma membrane);GO:0016021(integral component of membrane);GO:0016020(membrane);GO:0009986(cell surface);GO:0005929(cilium);GO:0005886(plasma membrane);GO:0005737(cytoplasm);GO:0005634(nucleus);GO:0002133(polycystin complex);GO:0072287(metanephric distal tubule morphogenesis);GO:0072237(metanephric proximal tubule…	NA	ssc-miR-184	m8	-0.0885	50	149	-21.68
ciRNA196	chr3	42313196	42313459	-	1	ciRNA	-	ENSSSCT00000008812	PKD1	mRNA	chr3:42313165-42313459	polycystin 1, transient receptor potential channel interacting [Source:HGNC Symbol;Acc:HGNC:9008]	GO:0070062(extracellular exosome);GO:0031514(motile cilium);GO:0016323(basolateral plasma membrane);GO:0016021(integral component of membrane);GO:0016020(membrane);GO:0009986(cell surface);GO:0005929(cilium);GO:0005886(plasma membrane);GO:0005737(cytoplasm);GO:0005634(nucleus);GO:0002133(polycystin complex);GO:0072287(metanephric distal tubule morphogenesis);GO:0072237(metanephric proximal tubule…	NA	ssc-miR-484	m8	-0.117	58	150	-31.54
ciRNA196	chr3	42313196	42313459	-	1	ciRNA	-	ENSSSCT00000008812	PKD1	mRNA	chr3:42313165-42313459	polycystin 1, transient receptor potential channel interacting [Source:HGNC Symbol;Acc:HGNC:9008]	GO:0070062(extracellular exosome);GO:0031514(motile cilium);GO:0016323(basolateral plasma membrane);GO:0016021(integral component of membrane);GO:0016020(membrane);GO:0009986(cell surface);GO:0005929(cilium);GO:0005886(plasma membrane);GO:0005737(cytoplasm);GO:0005634(nucleus);GO:0002133(polycystin complex);GO:0072287(metanephric distal tubule morphogenesis);GO:0072237(metanephric proximal tubule…	NA	ssc-miR-7138-5p	m8	-0.144	56	152	-20.99
[truncated: 75,022 more rows]
